# Supplementary material for: Activation of PPARγ by a Natural Flavonoid Modulator, Apigenin Ameliorates Obesity-Related Inflammation Via Regulation of Macrophage Polarization
Source: PubMed Central journal article supplement — eBioMedicine. 2016 Jun 15;9:61–76. doi: 10.1016/j.ebiom.2016.06.017 (PMC4972579; doi:10.1016/j.ebiom.2016.06.017), 2016-06-15
Supplement: mmc1.pdf [file mmc1.pdf]

**Activation of PPAR $\gamma$  by a natural flavonoid modulator, apigenin ameliorates obesity-related inflammation via regulation of macrophage polarization**

Xiujing Feng<sup>1</sup>, Dan Weng<sup>3</sup>, Feifei Zhou<sup>1</sup>, Young D. Owen<sup>4</sup>, Haohan Qin<sup>1</sup>, Jingfa Zhao<sup>1</sup>, Wen Yu<sup>1</sup>, Yahong Huang<sup>1</sup>, Jiajia Chen<sup>1</sup>, Haijian Fu<sup>5</sup>, Nanfei Yang<sup>1</sup>, Dianhua Chen<sup>1</sup>, Jianxin Li<sup>5</sup>, Renxiang Tan<sup>1</sup>, Pingping Shen <sup>\*1,2</sup>

1. State Key Laboratory of Pharmaceutical Biotechnology, School of life sciences, Nanjing University, Nanjing, China, 210046

2. MOE Key Laboratory of Model Animal for Disease Study, Model Animal Research Center, Nanjing Biomedical Research Institute, Nanjing Biomedical Research Institute, Nanjing University, Nanjing, China, 210046

3. Center for Molecular Metabolism, Nanjing University of Science and Technology, Nanjing, China, 210094

4. Graduate Medical Education, Virginia Mason Medical Center, Seattle, WA, USA, 98101

5. Key Lab of Analytical Chemistry for Life Science, School of Chemistry and Chemical Engineering, Nanjing University, Nanjing, China, 210046

\*Correspondence: [ppshen@nju.edu.cn](mailto:ppshen@nju.edu.cn)

Email: [ppshen@nju.edu.cn](mailto:ppshen@nju.edu.cn)

Phone: (86)-25-89686635

Fax: (86)-25-89684060

## Supplementary DATA

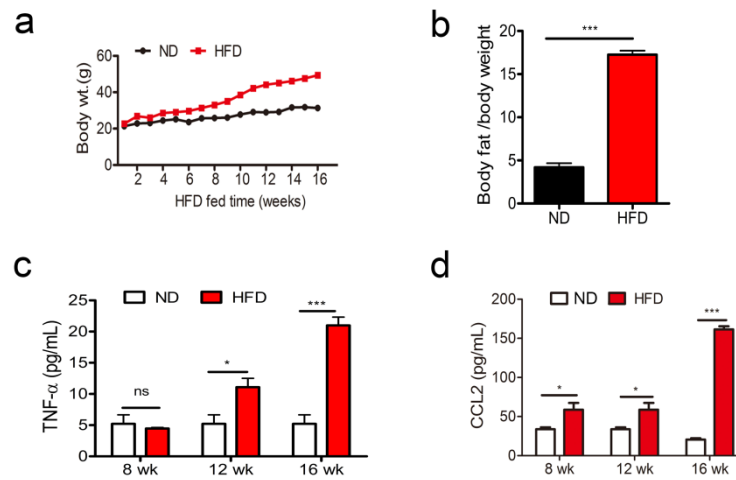

**Figure S1. The progression of inflammation along with the obesity**

**a.** The body weight of mice fed by a HFD for 16 weeks.  $n=9$ .

**b.** The fat/body weight index of mice fed by a HFD for 12 weeks.  $n=9$ . All values are expressed as mean  $\pm$  SEM. Statistical analysis is based on the Student's t-test. \*\*\* $P < 0.001$  compared with ND.

**c.** TNF- $\alpha$  was obviously increased in the serum of HFD mice at the indicated age.  $n=9$ . All values are expressed as mean  $\pm$  SEM. Statistical analysis is based on the Student's t-test. \* $P < 0.05$ , \*\*\* $P < 0.001$  compared with ND.

**d.** CCL2 was obviously regulated in serum of HFD mice at the indicated time fed by HFD.  $n=9$ . All values are expressed as mean  $\pm$  SEM. Statistical analysis is based on the Student's t-test. \* $P < 0.05$ , \*\*\* $P < 0.001$  compared with ND.

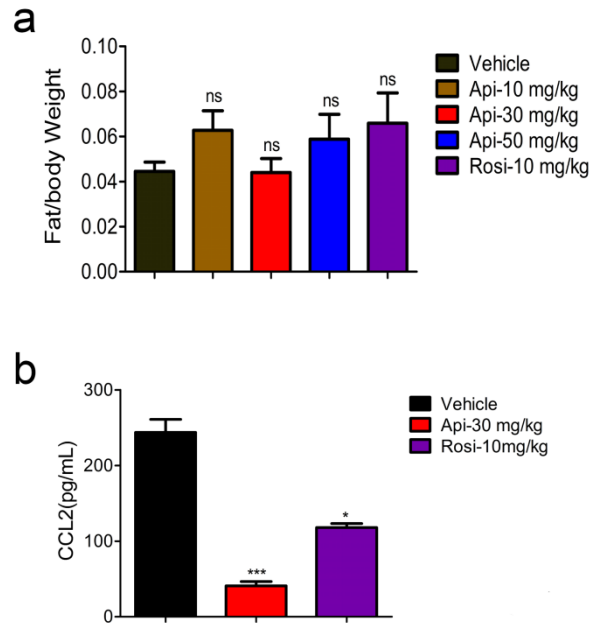

**Figure S2. The fat/body weight index and the level of CCL2 in the serum of mice affected by Api and Rosi**

**a.** The fat/body weight index of 16 weeks HFD-fed mice affected by Api or Rosi treated for 21 days. All values are expressed as mean  $\pm$  SEM.  $n=9$ . Statistical analysis is based on one-way ANOVA followed by a Dunnett's test. \*\*\* $P < 0.001$  compared with vehicle.

**b.** The level of CCL2 in the serum of 16 weeks HFD-fed mice treated with vehicle, 30mg/kg Api or 10mg/kg Rosi for 21 days.  $n=9$ . All values are expressed as mean  $\pm$  SEM. Statistical analysis is based on one-way ANOVA followed by a Dunnett's test.

\* $P < 0.05$ , \*\*\* $P < 0.001$  compared with vehicle.

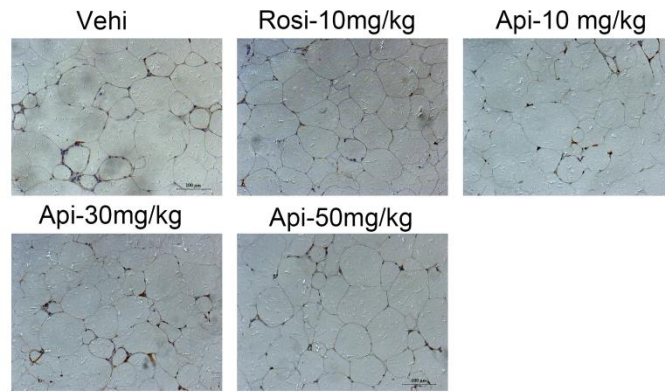

**Figure S3. IHC detection the macrophage marker CD68 in the adipose tissue of the HFD mice treated with vehicle, Api or Rosi for 21 days.**

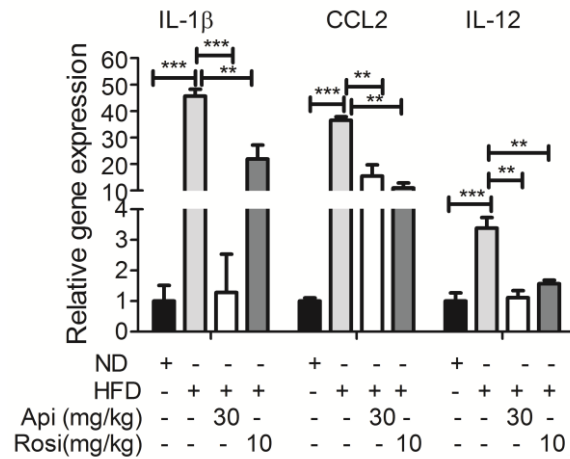

**Figure S4. The effect of Api on the expression of IL-12, CCL2 as well as IL-1 $\beta$  in the adipose tissue of HFD mice assayed by using qRT-PCR and normalized to ND group and the level of  $\beta$ -actin. All values are expressed as mean  $\pm$  SEM. Statistical analysis is based on one-way ANOVA followed by a Dunnett's test (n=9). \*\* $P < 0.01$ , \*\*\* $P < 0.001$ , HFD compared with ND, Api and Rosi compared with HFD, separately.**



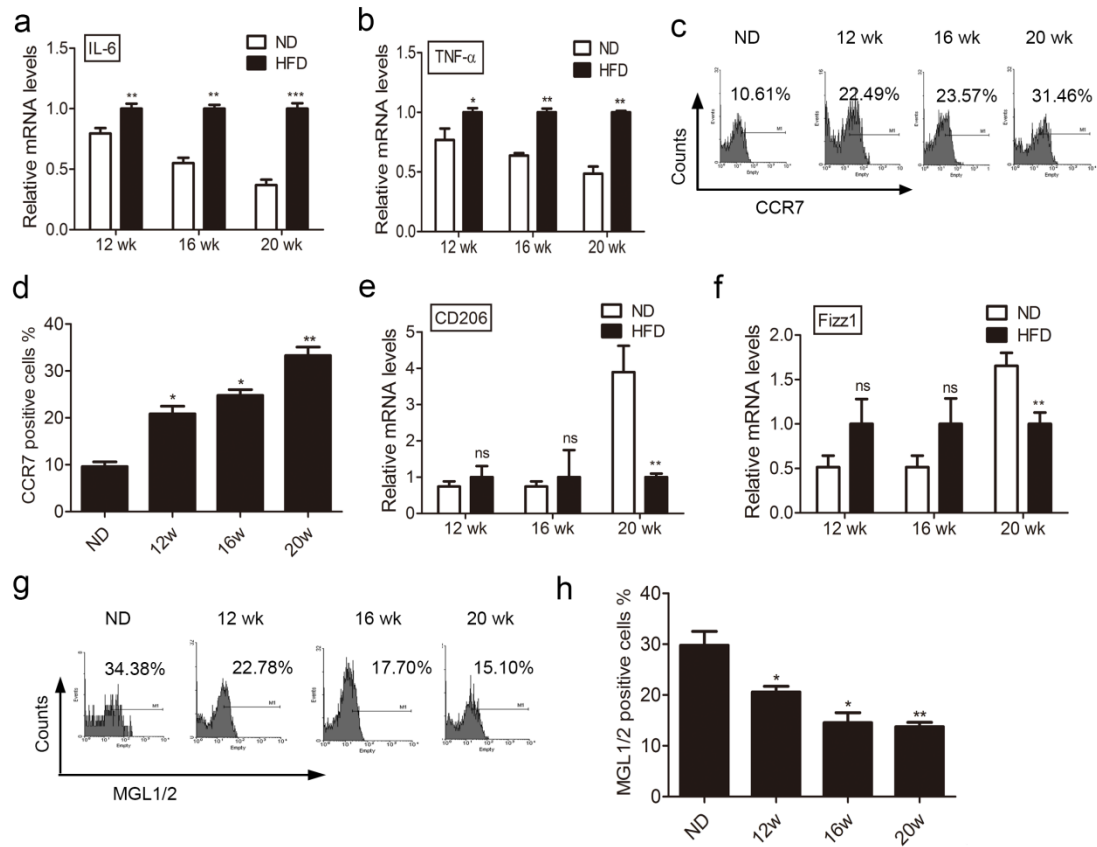

**Figure S5. The M1/M2 status of macrophages is imbalanced in the obese progression of HFD mice.**

**a-b, e-f.** cDNA of primary peritoneal macrophages in 12, 16 and 20 weeks old HFD mice were analyzed by qRT-PCR with indicated probes. Data indicate fold induction (normalized by  $\beta$ -actin signal) compared to corresponding signals in ND.  $n=9$ . All values are expressed as mean  $\pm$  SEM. Statistical analysis is based on the Student's t-test. Ns: no significant difference,  $*P < 0.05$ ,  $**P < 0.01$ ,  $***P < 0.001$  compared with ND.

**c.** Representative flow cytometry images of mice primary peritoneal macrophages hybridized with fluorescent antibodies specific for mice CCR7.

**d.** The quantification of the percent of CCR7 positive cells.  $n=9$ . All values are expressed as mean  $\pm$  SEM. Statistical analysis is based on one-way ANOVA followed

by a Dunnett's test. \* $P < 0.05$ , \*\* $P < 0.01$  compared with ND.

**g.** Representative flow cytometry images of mice primary peritoneal macrophages hybridized with fluorescent antibodies specific for mice MGL1/2.

**h.** The quantification of the percent of MGL1/2 positive cells.  $n=9$ . All values are expressed as mean  $\pm$  SEM. Statistical analysis is based on one-way ANOVA followed by a Dunnett's test. \* $P < 0.05$ , \*\* $P < 0.01$  compared with ND.

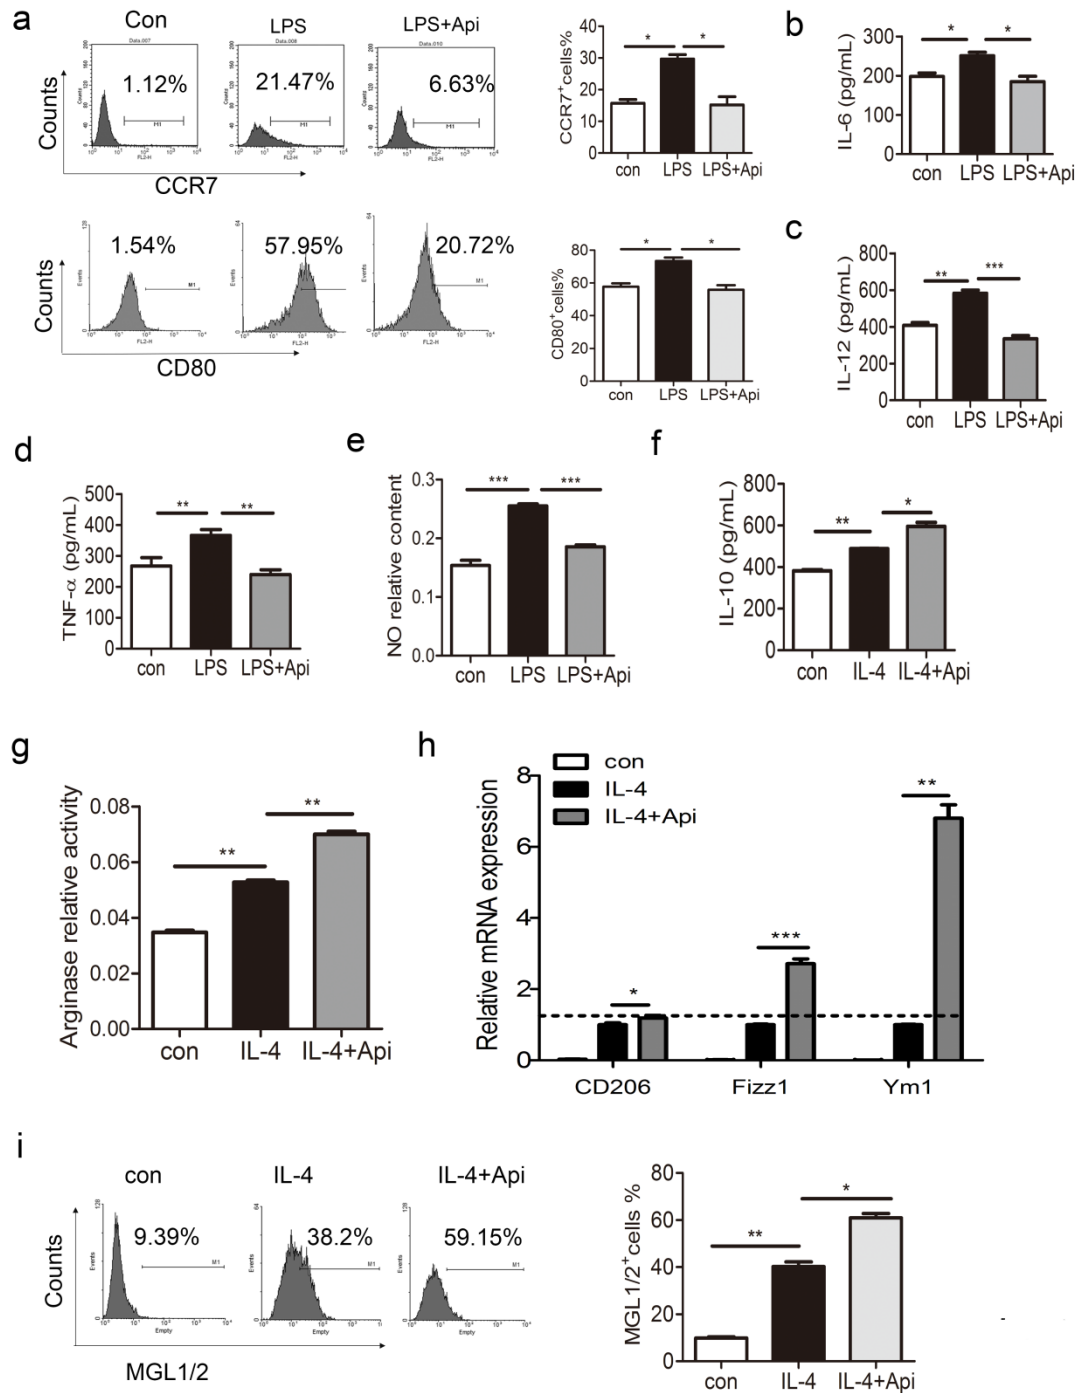

**Figure S6. Api regulates M1/M2 status of macrophages in M1 and M2 cell models.**

**a.** ANA-1 macrophage cells were treated with 500 ng/ml LPS, or 500ng/ml LPS Plus 7.5  $\mu$ M Api simultaneously for 24hours. The surface markers of macrophage, CCR7 and CD80, were analyzed by FACS (left) and significant assay (right). And **b-d**:

Pro-inflammatory cytokine IL-6, IL-12 and TNF- $\alpha$  release in treated macrophage cell culture supernatant were analyzed by ELISA assay. All values are expressed as mean  $\pm$  SEM. Statistical analysis is based on one-way ANOVA followed by a Dunnett's test. \* $P < 0.05$ , \*\* $P < 0.01$ , \*\*\* $P < 0.001$ , LPS compared with con, LPS+Api compared with LPS.

**e.** The NO release in the cell supernatant was assayed by a standard Griess reaction. All values are expressed as mean  $\pm$  SEM. Statistical analysis is based on one-way ANOVA followed by a Dunnett's test. \*\*\* $P < 0.001$ , LPS compared with con, LPS+Api compared with LPS.

**f.** ANA-1 macrophage cells were treated with 10 ng/ml IL-4, or 10ng/ml IL-4 Plus 7.5  $\mu$ M Api simultaneously for 24 hours. Levels of cytokine IL-10 in cell culture supernatant were assayed by ELISA assay. All values are expressed as mean  $\pm$  SEM. Statistical analysis is based on one-way ANOVA followed by a Dunnett's test. \* $p < 0.05$  for IL-4 versus control and \*\* $p < 0.01$  versus IL-4+Api.

**g.** ANA-1 macrophage cells were treated with 10 ng/ml IL-4, or 10ng/ml IL-4 Plus 7.5  $\mu$ M Api simultaneously for 24 hours. The relative activity of arginase was examined. All values are expressed as mean  $\pm$  SEM. Statistical analysis is based on one-way ANOVA followed by a Dunnett's test. \*\*  $P < 0.01$ , IL-4 compared with con, IL-4+Api compared with IL-4.

**h.** ANA-1 macrophage cells were treated with 10 ng/ml IL-4, or 10ng/ml IL-4 Plus 7.5  $\mu$ M Api simultaneously for 24 hours. The mRNA level of CD206, Fizz1 and Ym1 was assayed by qRT-PCR. Data indicate fold induction (normalized by  $\beta$ -actin signal)

compared to control. All values are expressed as mean  $\pm$  SEM. Statistical analysis is based on one-way ANOVA followed by a Dunnett's test. \* $P < 0.05$ , \*\* $P < 0.01$ , \*\*\* $P < 0.001$ . IL-4 compared with con, IL-4+Api compared with IL-4.

**i.** ANA-1 macrophage cells were treated with 10 ng/ml IL-4, or 10ng/ml IL-4 Plus 7.5  $\mu$ M Api simultaneously for 24hours. Then, the surface marker of macrophage, MGL1/2, was assayed by FACS (left). All values are expressed as mean  $\pm$  SEM. Statistical analysis (right) is based on one-way ANOVA followed by a Dunnett's test. \* $P < 0.05$ , \*\*  $P < 0.01$ , IL-4 compared with con, IL-4+Api compared with LPS.

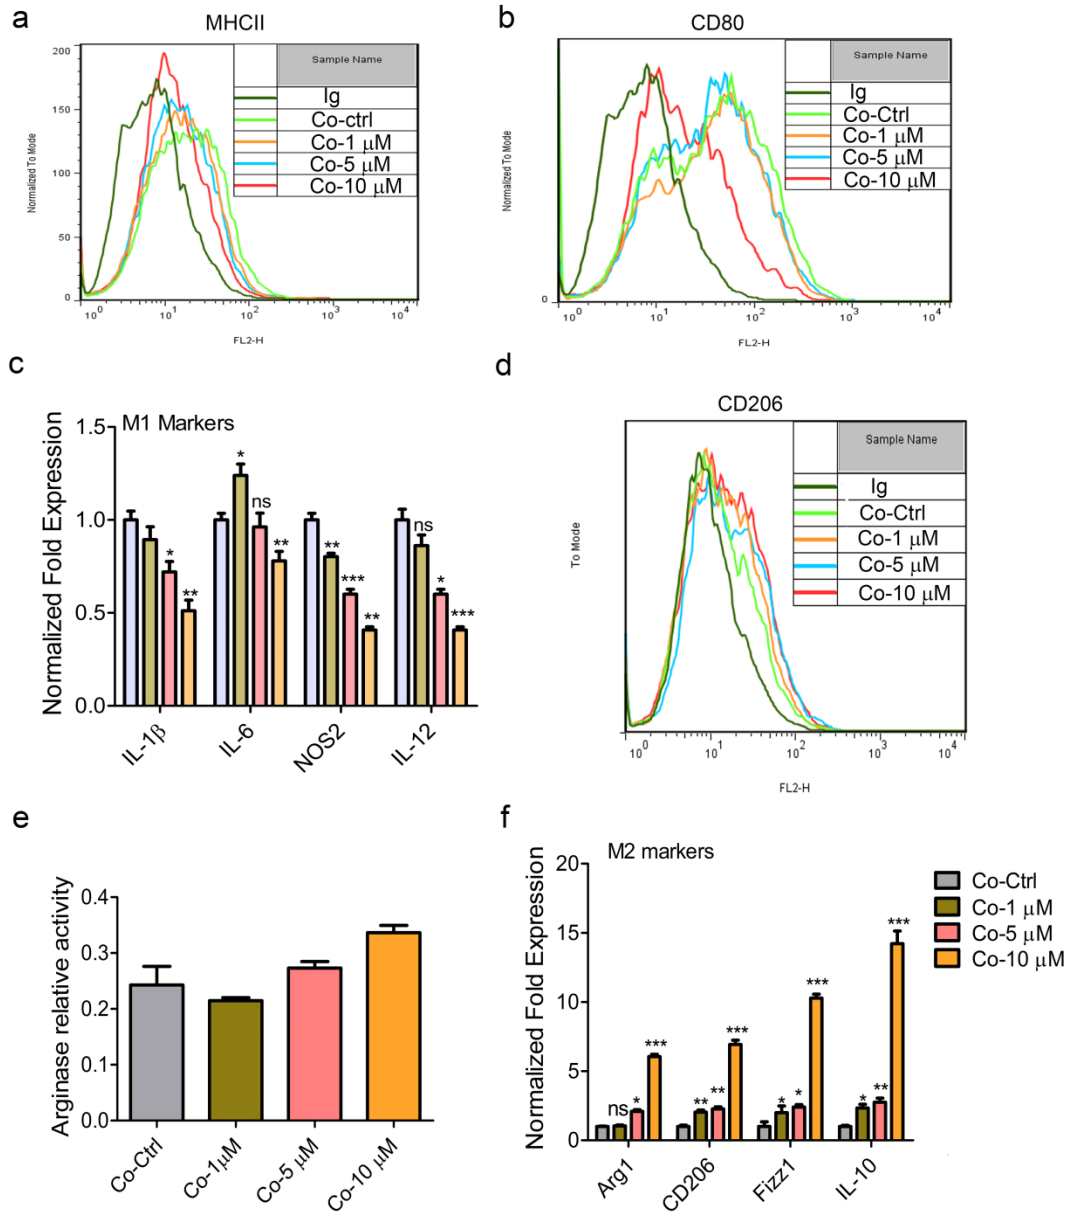

**Figure S7. Api regulates the macrophage M1/M2 status in macrophage/adipocyte co-culture cell model.**

**a-b, d.** 100, 000 ANA-1 cells were co-incubated with differentiated 3T3-L1 adipocytes for 2 days. Cultures were stimulated with Api (1 μM, 5 μM, 10 μM) for 24 hours, and then the expression of surface markers of macrophages was measured by flow cytometry. Representative flow cytometry images of macrophage hybridized with fluorescent antibody specific for mice MHCII, CD80 and CD206.

e. The relative activity of arginase in the cultures was examined. All values are expressed as mean  $\pm$  SEM. Statistical analysis is based on one-way ANOVA followed by a Dunnett's test.

**c and f.** Relative mRNA expressions of IL-1 $\beta$ , IL-6, NOS2, IL-12 (M1 markers) and Arg1, CD206, Fizz1, IL-10(M2 markers) in the cultural macrophages were measured by using qRT-PCR, and normalized to Co-Ctrl group and the level of  $\beta$ -actin. All values are expressed as mean  $\pm$  SEM. Statistical analysis is based on one-way ANOVA followed by a Dunnett's test. \* $P < 0.05$ , \*\* $P < 0.01$ , \*\*\* $P < 0.001$  compared with co-ctrl.

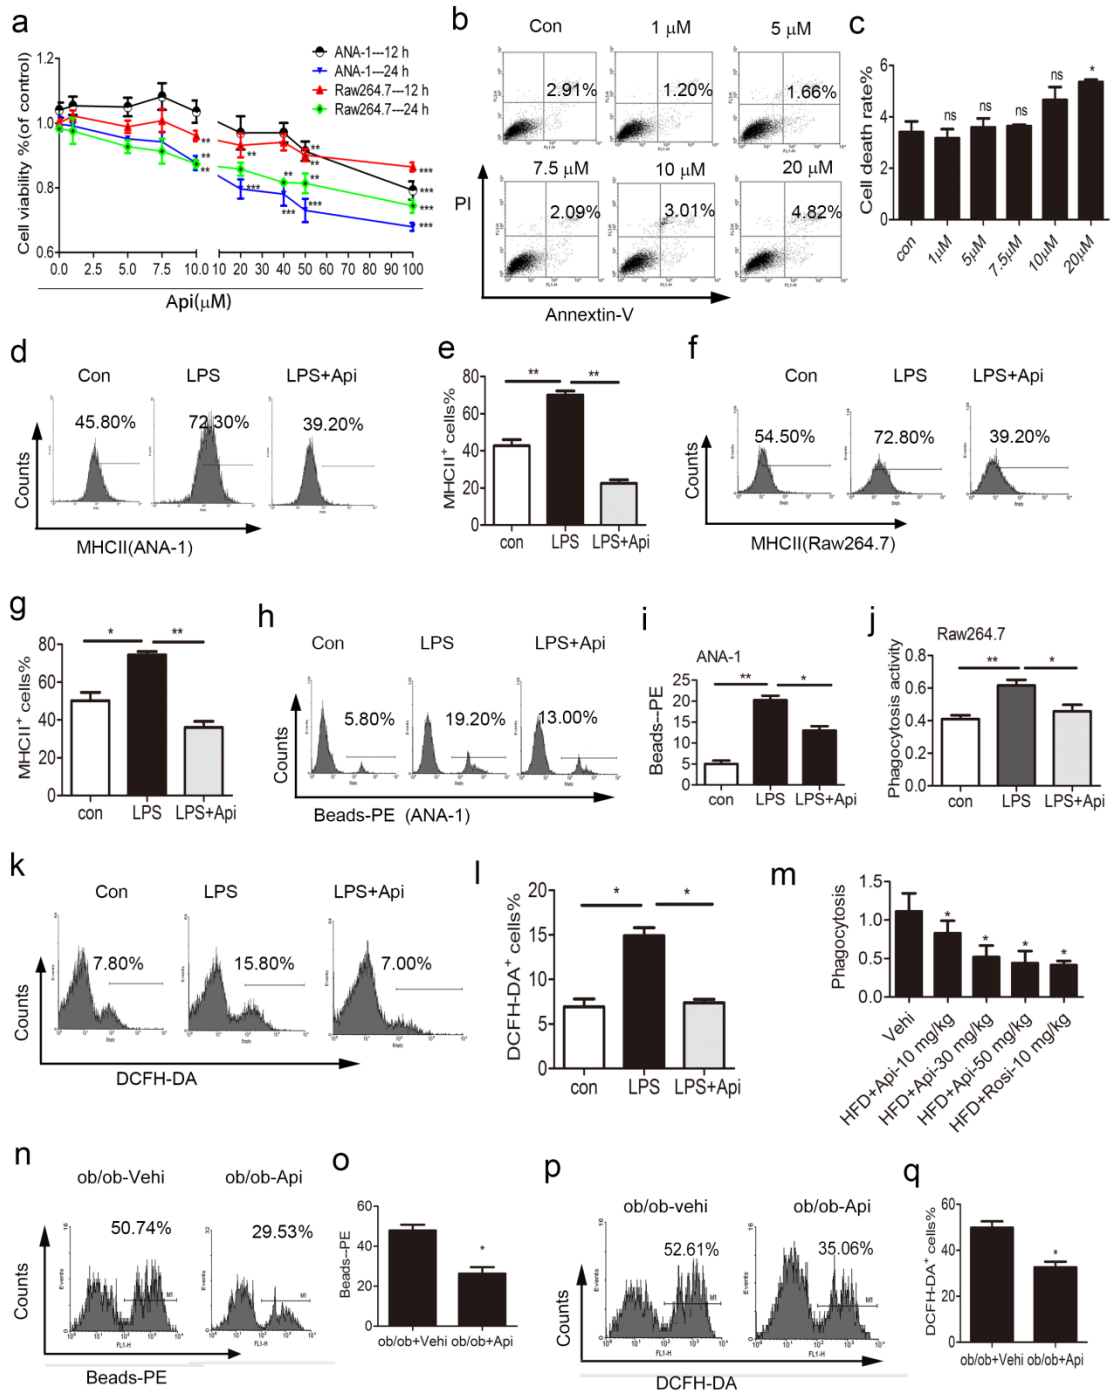

**Figure S8. Api affected the biological functions of macrophages in vitro and in vivo.**

**a.** The effect of various concentrations of Api (1-100  $\mu\text{M}$ ) on the viability of macrophages assayed by MTT method.

**b.** The apoptotic assay of macrophages affected by Api assayed by FITC-Annex and



PI staining.

c. The quantification of the FACS analysis. All values are expressed as mean  $\pm$  SEM.

Statistical analysis is based on one-way ANOVA followed by a Dunnett's test. \* $P < 0.05$ , ns, no significant difference, compared with con.

**d-g.** The expression of MHCII in ANA-1(D-E) and Raw264.7 cells assayed by FACS and (F-G) the quantification of the flow data. All values are expressed as mean  $\pm$  SEM. Statistical analysis is based on one-way ANOVA followed by a Dunnett's test. \*\*\* $P < 0.001$ , LPS compared with con, LPS+Api compared with LPS.

**h.** The phagocytosis of ANA-1 cells examined by the uptake of microspheres and **(i)** the quantification of FACS analysis. All values are expressed as mean  $\pm$  SEM. Statistical analysis is based one-way ANOVA followed by a Dunnett's test.  $p^* < 0.05$ , \*\* $P < 0.01$ , LPS compared with con, LPS+Api compared with LPS.

**j.** Raw264.7 cells by differential uptake of neutral red. All values are expressed as mean  $\pm$  SEM. Statistical analysis is based one-way ANOVA followed by a Dunnett's test.  $P^* < 0.05$ , \*\* $P < 0.01$ , LPS compared with con, LPS+Api compared with LPS.

**K.** FACS analysis intracellular ROS levels of these macrophages and **(L)** the quantification of FACS analysis. All values are expressed as mean  $\pm$  SEM. Statistical analysis is based on one-way ANOVA followed by a Dunnett's test.  $P^* < 0.05$ , \*\* $P < 0.01$ , LPS compared with con, LPS+Api compared with LPS.

**m.** The phagocytosis capability was detected by the differential uptake of neutral red by ATM from the indicated groups in the HFD mice. All values are expressed as mean  $\pm$  SEM. Statistical analysis is based on one-way ANOVA followed by a Dunnett's test.

\* $P < 0.05$ , ns, no significant difference, compared with con.

**n.** The phagocytosis of ATM of ob/ob mice examined by the uptake of microspheres and (O) the quantification of FACS analysis.  $n=9$  or 6 per group. All values are expressed as mean  $\pm$  SEM. Statistical analysis is based on one-way ANOVA followed by a Dunnett's test.  $p^* < 0.05$  compared with vehicle.

**p.** FACS analysis intracellular ROS levels in the primary macrophages of ob/ob mice and (q) the quantification of FACS analysis by GraphPad prism 5.0.  $n=9$  or 6 per group. All values are expressed as mean  $\pm$  SEM. Statistical analysis is based on the Student's t-test.  $p^* < 0.05$  compared with vehicle.

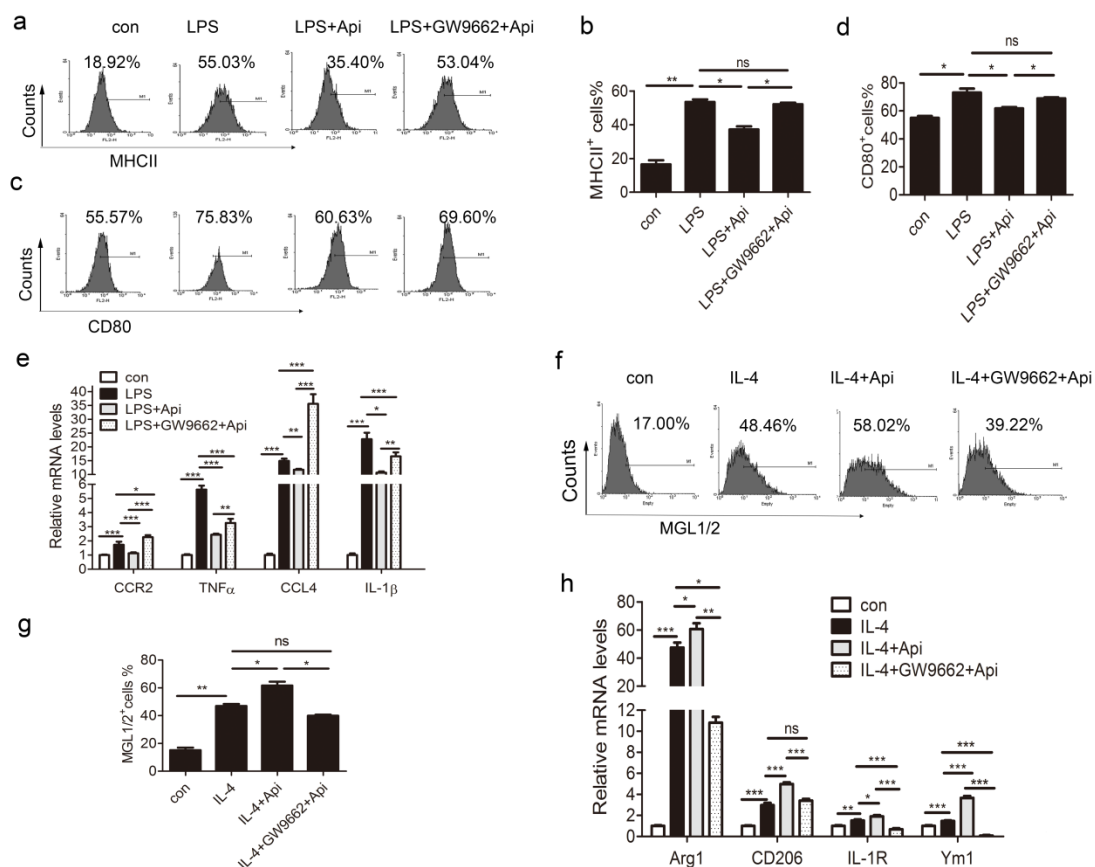

**Figure S9. Api regulates M1/M2 status through activating PPAR $\gamma$ .**

**a-b.** ANA-1 cells were pre-incubated with 10  $\mu$ M GW9662 for 24 hours and then added the 7.5  $\mu$ M Api for another 24 hours, the non pre-incubated cells were normally

cultured or stimulated with 500ng/ml LPS at the presence or absence of 7.5  $\mu$ M Api for 24 hours as control groups. Surface expression of MHCII was assayed by FACS and quantified by GraphPad prism 5.0. All values are expressed as mean  $\pm$  SEM. Statistical analysis is based on one-way ANOVA followed by a Dunnett's test. \* $P$  < 0.05, \*\* $P$ <0.01, ns, no significant difference, compared with con.

**c-d.** ANA-1 cells were pre-incubate with 10  $\mu$ M GW9662 for 24 hours and then added the 7.5  $\mu$ M Api for another 24 hours, the non pre-incubated cells were normally cultured or stimulated with LPS at the presence or absence of 7.5  $\mu$ M Api for 24 hours as control groups. All values are expressed as mean  $\pm$  SEM. Surface expression of CD80 was assayed by FACS and quantified by GraphPad prism 5.0. Statistical analysis is based on one-way ANOVA followed by a Dunnett's test. \* $P$  < 0.05, \*\* $P$  <0.01, ns, no significant difference, compared with con.

**e.** Relative mRNA levels of CCR2, ITNF- $\alpha$ , CCL4 and L-1 $\beta$  were measured by quantitative real-time RT-PCR and normalized to Con group and the level of  $\beta$ -actin. All values are expressed as mean  $\pm$  SEM. All values are expressed as mean  $\pm$  SEM. Statistical analysis is based on one-way ANOVA followed by a Dunnett's test. \* $P$  < 0.05, \*\* $P$  <0.01, ns, no significant difference, compared with con.

**f-g.** ANA-1 cells were pre-incubate with GW9662 for 24 hours and then added the Api for another 24 hrs, the non pre-incubated cells were normally cultured or stimulated with IL-4 at the presence or absence of Api for 24 hours as control groups. Surface expression of MGL1/2 was assayed by FACS and quantified by GraphPad prism 5.0. All values are expressed as mean  $\pm$  SEM. Statistical analysis is based on

one-way ANOVA followed by a Dunnett's test. \* $P < 0.05$ , \*\* $P < 0.01$ , ns, no significant difference, compared with con.

**h.** Relative mRNA levels of surface markers, CD206, Arg1, Ym1 and IL-1r were measured by quantitative real-time PCR as described above and normalized to Con group and the level of  $\beta$ -actin. All values are expressed as mean  $\pm$  SEM. Statistical analysis is based on one-way ANOVA followed by a Dunnett's test. \* $P < 0.05$ , \*\* $P < 0.01$ , \*\*\* $P < 0.001$ , ns, no significant difference, compared with con.

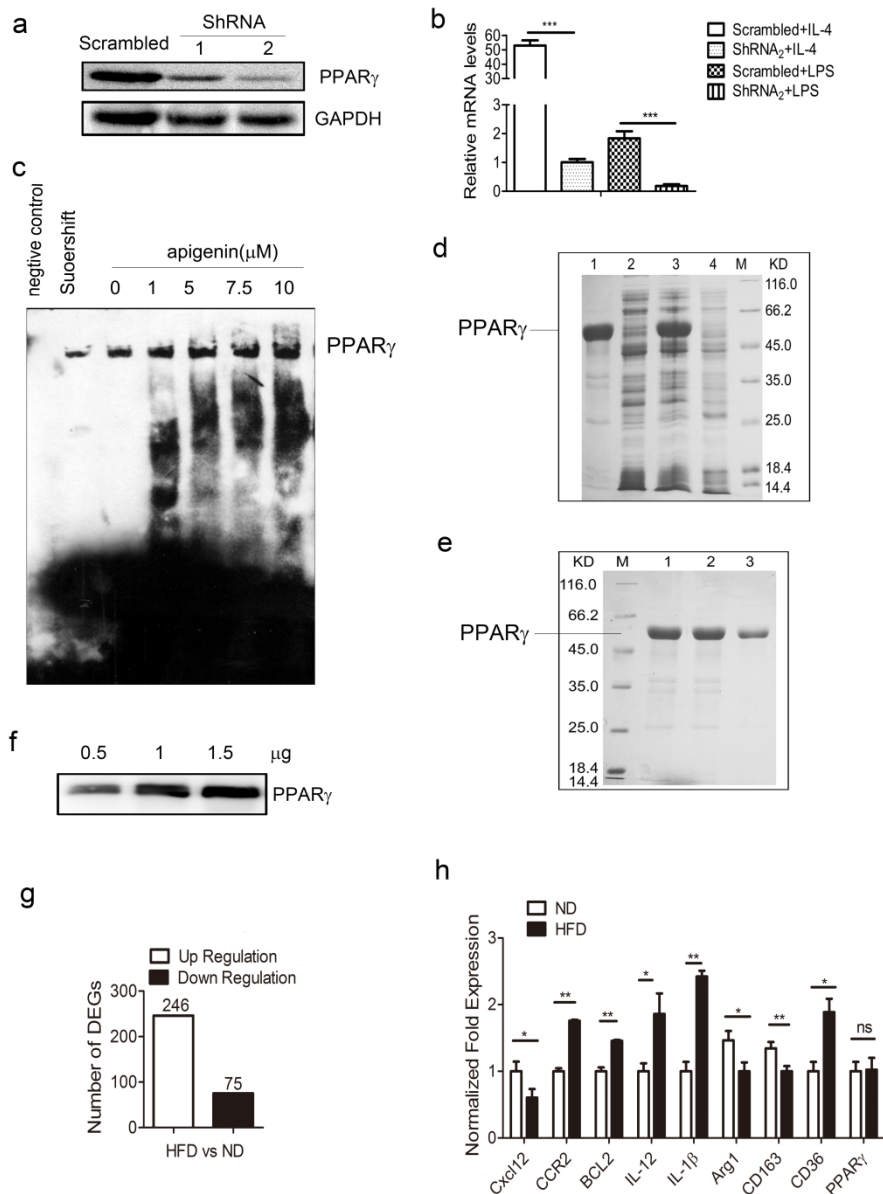

**Figure S10. Identification of PPAR $\gamma$  knock down, Api activates transcriptional activation of PPAR $\gamma$ , the expression and identification of PPAR $\gamma$  protein in bacteria and identification of RNA-Seq.**

**a.** Western blotting assay.

**b.** qRT-PCR identifies the effect of PPAR $\gamma$  shRNA knock down. All values are expressed as mean  $\pm$  SEM. Statistical analysis is based on one-way ANOVA followed by a Dunnett's test. \*\*\* $P < 0.001$ , Compared with scrambled.

**c.** Api increases the transcriptional activation of PPAR $\gamma$  assayed by EMSA.

**d.** The expression of PPAR $\gamma$ -his in bacteria was staining with coomassie brilliant blue.

Lane M: Protein Marker, Lane 1: precipitate of 37 degree induction with 0.5mM IPTG, Lane 2: supernatant of 37 degree induction with 0.5mM IPTG, Lane 3: induced, Lane 4: un-induced.

**e.** The purification of PPAR $\gamma$ -his and the identification assay by using coomassie brilliant blue staining, Lane M: protein marker, Lane 1: unpurified, Lane 2: Flow, Lane 3: Elution.

**f.** The identification of PPAR $\gamma$ -his by using western blotting.

**g.** The differential genes in the peritoneal macrophages between HFD and ND mice.

**h.** qRT-PCR assay confirms the data of sequencing and the data was normalized to ND and the level of  $\beta$ -actin. All values are expressed as mean  $\pm$  SEM. Statistical analysis is based on the Student's t-test. \* $P < 0.05$ , ns, no significant difference, HFD compared with ND.

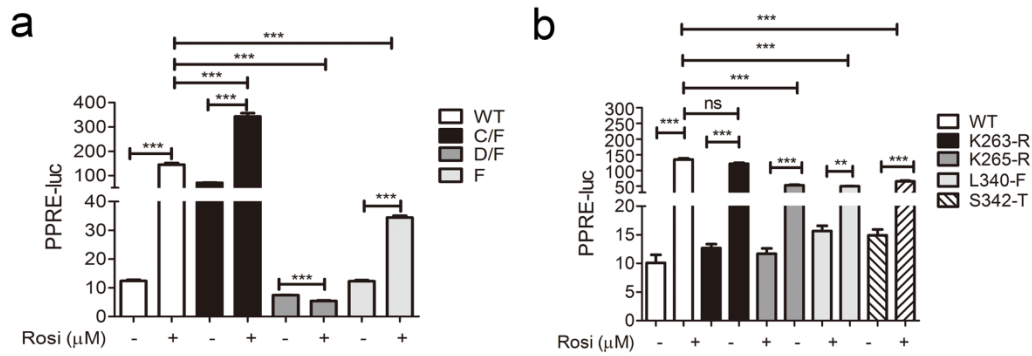

**Figure S11. The effect of PPAR $\gamma$  mutants on the Rosi activating PPAR $\gamma$**

HER293T cells were transfected with pIRES-mPPAR $\gamma$  truncated mutants/PPRE and pRL-control using Lipofectamine 2000. Then cells were pre-treated with 10  $\mu$ M Rosi for 24 hours. Luciferase activities were measured by using the Dual-Luciferase reporter assay system. All values are expressed as mean  $\pm$  SEM. Statistical analysis is based on one-way ANOVA followed by a Dunnett's test. \* $P < 0.05$ , \*\* $P < 0.01$ , \*\*\* $P < 0.001$  compared with 0 group.

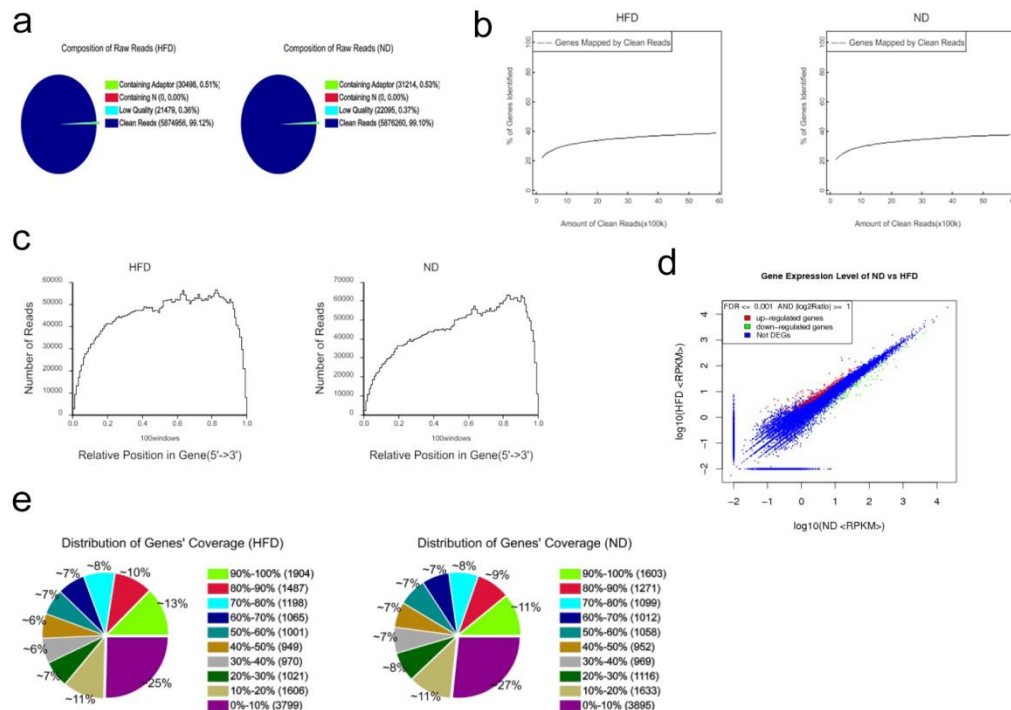

**Figure S12. The number of reads, threshold, reproducibility and number of repeats**

a. Composition of raw reads of ND and HFD sample

b. The amount of clean reads

c. The number of reads,

d. The gene expression level

e. The distribution of gene coverage

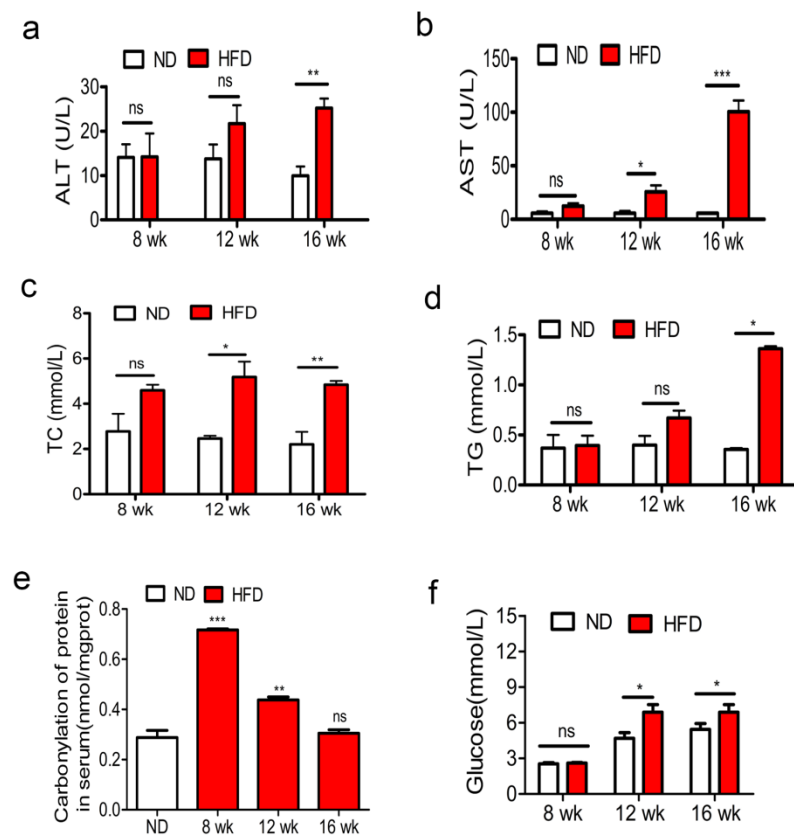

**Figure S13. The progression of metabolic disorders along with the obesity.**

**a.** ALT in the serum of HFD mice was significantly reduced with the development of obesity.  $n=9$ . All values are expressed as mean  $\pm$  SEM. Statistical analysis is based on the Student's t-test. \*\*  $P < 0.01$  HFD compared with ND.

**b.** AST in the serum of HFD mice was significantly reduced with the development of obesity.  $n=9$ . All values are expressed as mean  $\pm$  SEM. Statistical analysis is based on the Student's t-test. \* $P < 0.05$ , \*\*\* $P < 0.001$ , ns, no significant difference, HFD

compared with ND.

c. TC in serum of HFD mice was significantly increased with the development of obesity. n=9. All values are expressed as mean  $\pm$  SEM. Statistical analysis is based on the Student's t-test. \* $P < 0.05$ , \*\* $P < 0.01$ , ns, no significant difference, HFD compared with ND.

d. TG in serum of HFD mice was significantly increased with the development of obesity. n=8 per group. All values are expressed as mean  $\pm$  SEM. Statistical analysis is based on the Student's t-test. \* $P < 0.05$ , ns, no significant difference, HFD compared with ND.

e. Carbonylation of protein in serum was significantly increased followed by the development of obesity. n=9. All values are expressed as mean  $\pm$  SEM. Statistical analysis is based on one-way ANOVA followed by a Dunnett's test. \*\* $P < 0.01$ , \*\*\* $P < 0.001$ , ns, no significant difference, HFD compared with ND.

f. Glucose in serum of HFD mice was significantly increased followed by the progression of obesity. n=9. All values are expressed as mean  $\pm$  SEM. Statistical analysis is based on the Student's t-test. \* $P < 0.05$ , ns, no significant difference, HFD compared with ND.

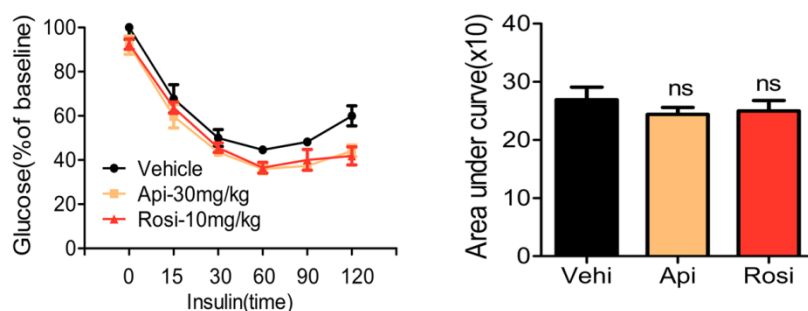

**Figure S14. Insulin resistance test and the total area under the curve (AUC) in**



**HFD mice treated with vehicle, Api or rosiglatazone.** n=8 per group. Statistical analysis is based on one-way ANOVA followed by a Dunnett's test. Ns, no significant difference, \* $p < 0.05$  compared with vehicle group.

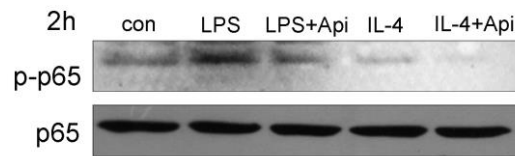

**Figure S15. The effect of Api on the p65 phosphorylation in macrophage**

ANA-1 macrophages were treated with 500ng/ml LPS, 10ng/ml IL-4, 500ng/ml LPS plus 7.5 $\mu$ M Api simultaneously or 10ng/ml IL-4 plus 7.5 $\mu$ M Api for 2 hr. The nuclei and cytoplasm proteins were lysed and subjected to western blotting.

**Table s1: The genes associated with the growth and survival of cells**

|          |          |          |    |          |          |          |                                   |
|----------|----------|----------|----|----------|----------|----------|-----------------------------------|
| 1.17044  | 3.702244 | 1.661349 | Up | 3.16E-09 | 8.30E-08 | Bcl2     | B-cell<br>leukemia/lymphoma 2     |
| 4.884421 | 17.67829 | 1.855719 | Up | 3.71E-28 | 3.98E-26 | Fchsd2   | FCH and double SH3<br>domains 2   |
| 0.701365 | 2.478977 | 1.821506 | Up | 1.24E-05 | 0.000165 | Gpr174   | G protein-coupled<br>receptor 174 |
| 1.812134 | 6.378468 | 1.81552  | Up | 2.79E-08 | 6.22E-07 | Gata2    | GATA binding<br>protein 2         |
| 2.359214 | 8.117085 | 1.782655 | Up | 5.34E-07 | 9.50E-06 | Gimap3   | GTPase, IMAP<br>family member 3   |
| 2.887522 | 9.046182 | 1.647477 | Up | 5.50E-07 | 9.74E-06 | Traf3ip3 | TRAF3 interacting<br>protein 3    |
| 17.02403 | 46.52074 | 1.450302 | Up | 3.16E-27 | 3.22E-25 | Cpeb4    | cytoplasmic<br>polyadenylation    |

---

|          |          |          |    |          |          |        |                         |
|----------|----------|----------|----|----------|----------|--------|-------------------------|
|          |          |          |    |          |          |        | element binding         |
|          |          |          |    |          |          |        | protein 4               |
| 7.81391  | 19.15081 | 1.293289 | Up | 6.15E-15 | 3.13E-13 | Mdm4   | transformed mouse       |
|          |          |          |    |          |          |        | 3T3 cell double         |
|          |          |          |    |          |          |        | minute 4                |
| 3.159698 | 7.633507 | 1.272559 | Up | 3.77E-07 | 6.91E-06 | Gng2   | guanine nucleotide      |
|          |          |          |    |          |          |        | binding protein (G      |
|          |          |          |    |          |          |        | protein), gamma 2       |
| 25.81388 | 60.66084 | 1.232618 | Up | 7.61E-40 | 1.25E-37 | Vcam1  | vascular cell adhesion  |
|          |          |          |    |          |          |        | molecule 1              |
| 9.20679  | 21.43515 | 1.219208 | Up | 5.24E-33 | 6.59E-31 | Eif2c2 | eukaryotic translation  |
|          |          |          |    |          |          |        | initiation factor 2C, 2 |
| 28.47223 | 66.1097  | 1.215307 | Up | 1.74E-19 | 1.26E-17 | Faim3  | Fas apoptotic           |
|          |          |          |    |          |          |        | inhibitory molecule 3   |
| 59.91064 | 137.1471 | 1.19484  | Up | 1.32E-52 | 2.63E-50 | Fos    | FBJ osteosarcoma        |
|          |          |          |    |          |          |        | oncogene                |
| 1.151441 | 2.464612 | 1.09792  | Up | 5.63E-06 | 8.10E-05 | Atm    | ataxia telangiectasia   |
|          |          |          |    |          |          |        | mutated homolog         |
|          |          |          |    |          |          |        | (human)                 |
| 7.505227 | 15.68213 | 1.063154 | Up | 5.95E-10 | 1.73E-08 | Elk4   | ELK4, member of         |
|          |          |          |    |          |          |        | ETS oncogene family     |
| 2.888211 | 6.015486 | 1.058505 | Up | 2.08E-05 | 0.000263 | Pou6f1 | POU domain, class 6,    |
|          |          |          |    |          |          |        | transcription factor 1  |
| 3.365392 | 6.917189 | 1.039411 | Up | 1.17E-05 | 0.000157 | Rrp12  | ribosomal RNA           |
|          |          |          |    |          |          |        | processing 12           |
|          |          |          |    |          |          |        | homolog (S.             |
|          |          |          |    |          |          |        | cerevisiae)             |
| 4.509674 | 9.228989 | 1.03315  | Up | 4.42E-08 | 9.48E-07 | Topbp1 | topoisomerase (DNA)     |
|          |          |          |    |          |          |        | II binding protein 1    |

---

**Table s2:** The genes associated with insulin resistance

---

|          |          |          |    |          |          |          |                                                                    |
|----------|----------|----------|----|----------|----------|----------|--------------------------------------------------------------------|
| 1.90423  | 6.325584 | 1.731991 | Up | 2.38E-26 | 2.31E-24 | Cacna1e  | calcium channel,<br>voltage-dependent, R type, alpha<br>1E subunit |
| 2.46296  | 7.742404 | 1.652388 | Up | 3.72E-10 | 1.11E-08 | Lars2    | leucyl-tRNA synthetase,<br>mitochondrial                           |
| 1.077649 | 3.292649 | 1.611361 | Up | 1.96E-05 | 0.000249 | Plcg1    | phospholipase C, gamma 1                                           |
| 1.885036 | 4.303831 | 1.191029 | Up | 2.39E-05 | 0.000299 | Eif2ak4  | eukaryotic translation initiation<br>factor 2 alpha kinase 4       |
| 3.583933 | 7.955381 | 1.150387 | Up | 5.65E-09 | 1.42E-07 | Dennd4c  | DENN/MADD domain containing<br>4C                                  |
| 3.353668 | 7.210831 | 1.104426 | Up | 5.16E-07 | 9.19E-06 | Med23    | mediator complex subunit 23                                        |
| 3.533878 | 7.396029 | 1.065498 | Up | 6.63E-07 | 1.16E-05 | Inpp11   | inositol polyphosphate<br>phosphatase-like 1                       |
| 3.563935 | 7.393734 | 1.052832 | Up | 8.56E-06 | 0.000118 | Arrdc3   | arrestin domain containing 3                                       |
| 5.310088 | 10.66187 | 1.005652 | Up | 1.58E-16 | 9.03E-15 | Arhgef12 | Rho guanine nucleotide exchange<br>factor (GEF) 12                 |

---

**Table s3:** The genes associated with the activation of T cells

---

|          |          |          |    |          |          |        |                                                                           |
|----------|----------|----------|----|----------|----------|--------|---------------------------------------------------------------------------|
| 0.089821 | 2.243011 | 4.64224  | Up | 4.23E-07 | 7.70E-06 | Cd8a   | CD8 antigen, alpha chain                                                  |
| 0.39709  | 4.958068 | 3.64224  | Up | 3.07E-06 | 4.73E-05 | Cd8b1  | CD8 antigen, beta chain 1                                                 |
| 0.262502 | 2.949842 | 3.490237 | Up | 4.57E-10 | 1.36E-08 | Itk    | IL2-inducible T-cell kinase                                               |
| 0.66938  | 5.12617  | 2.936984 | Up | 4.98E-05 | 0.000573 | Lat    | linker for activation of T cells                                          |
| 0.391559 | 5.084575 | 3.698824 | Up | 1.65E-06 | 2.66E-05 | Cd3e   | CD3 antigen, epsilon polypeptide                                          |
| 1.57817  | 5.930279 | 1.909848 | Up | 2.82E-09 | 7.51E-08 | Spn    | sialophorin                                                               |
| 0.590984 | 1.8553   | 1.650461 | Up | 6.65E-05 | 0.000741 | Nfatc2 | nuclear factor of activated T-cells, cytoplasmic, calcineurin-dependent 2 |
| 5.107078 | 11.95319 | 1.226826 | Up | 6.32E-14 | 2.95E-12 | Fam65b | family with sequence similarity 65, member B                              |
| 2.308749 | 5.007672 | 1.117029 | Up | 9.20E-05 | 0.000987 | Nkap   | NFKB activating protein                                                   |

---

**Table s4:** The genes associated with inflammation

---

|          |          |          |      |          |          |          |                                                                |
|----------|----------|----------|------|----------|----------|----------|----------------------------------------------------------------|
| 5.750768 | 13.99675 | 1.283265 | Up   | 3.95E-11 | 1.30E-09 | Tlr9     | toll-like receptor 9                                           |
| 59.91064 | 137.1471 | 1.19484  | Up   | 1.32E-52 | 2.63E-50 | Fos      | FBJ osteosarcoma oncogene                                      |
| 2.308749 | 5.007672 | 1.117029 | Up   | 9.20E-05 | 0.000987 | Nkap     | NFKB activating protein                                        |
| 9.374794 | 19.14479 | 1.030093 | Up   | 1.10E-08 | 2.63E-07 | Map4k1   | mitogen-activated protein<br>kinase kinase kinase kinase 1     |
| 45.20528 | 90.77327 | 1.005776 | Up   | 1.19E-23 | 1.04E-21 | Klf2     | Kruppel-like factor 2 (lung)                                   |
| 1411.941 | 547.0281 | -1.36799 | Down | 0        | 0        | Il10     | interleukin 10                                                 |
| 623.7515 | 87.24827 | -2.83777 | Down | 0        | 0        | Tnf      | tumor necrosis factor                                          |
| 226.6596 | 28.974   | -2.9677  | Down | 0        | 0        | Serpine1 | serine (or cysteine) peptidase<br>inhibitor, clade E, member 1 |
| 23.18139 | 6.615839 | -1.80897 | Down | 8.98E-14 | 4.08E-12 | Ifi205   | interferon activated gene 205                                  |
| 1.884181 | 0.54481  | -1.79011 | Down | 8.88E-05 | 0.000958 | Cxcl12   | chemokine (C-X-C motif)<br>ligand 12                           |

---

**Table s5:** The primers used in this paper

|                  |                                       |
|------------------|---------------------------------------|
| CD206-F          | 5'-GCA GGT GGT TTA TGG G AT GT-3';    |
| CD206-R          | 5'-GGG TTC AGG AGT TGT TGTGG-3';      |
| Ym1-F            | 5'-AGA AGG GAG TTT CAA ACC TGG T-3';  |
| Ym1-R            | 5'-GTC TTG CTC ATG TGT GTA AGT GA-3'; |
| $\beta$ -Actin-F | 5'-GCT CTG GCT CCT AGC ACC-3';        |
| $\beta$ -Actin-R | 5'-CCA CTA TCC ACA CAG AGT ACT TG-3'; |
| Arg1-F           | 5'-AAG ACA GCA GAG GAG GTG-3';        |
| Arg1-R           | 5'-AGT CAG TCC CTG GCT TAT-3';        |
| CCL3-F           | 5'-TGA GAG TCT TGG AGG CAG CGA-3';    |
| CCL3-R           | 5'-TGTGGCTACTTGGCAGCAAACA-3'          |
| IL-12 $\beta$ -F | 5'-GAAAGACCCTGACCATCACT -3';          |
| IL-12 $\beta$ -R | 5'-CTT CTC TGC AGA CAG AGAC-3'        |
| CD36-F           | 5'-AAG CTA TTG CGA CAT GATT-3';       |
| CD36-R           | 5'-GAT CCG AAC ACA GCG TAG AT-3'      |
| PPAR $\gamma$ -F | 5'-GGAAGACCACTCGCATTCCTT-3'           |
| PPAR $\gamma$ -R | 5'-TCGCACTTTGGTATTCTTGGAG-3'          |
| CCR2-F           | 5'-ATGCAAGTTCAGCTGCCTGC-3'            |
| CCR2-R           | 5'-ATGCCGTGGATGAACTGAGG-3'            |
| Ym1-F            | 5':GGGCATACCTTTATCCTGAG-3'            |
| Ym1-R            | 5':CCACTGAAGTCATCCATGTC-3'            |
| NOS2-F           | 5':GCTTCTGGTCGATGTCATGAG-3'           |
| NOS2-R           | 5':TCCACCAGGAGATGTTGAAC-3'            |
| IL-1 $\beta$ -F  | 5':GTGTGGATCCAAAGCAATAC-3'            |
| IL-1 $\beta$ -R  | 5':GTCTGCTCATTCATGACAAG-3'            |
| CD163-F          | 5':GAGCATGAATGAAGTGTC-3'              |
| CD163-R          | 5':TGCTGAAGTTGTCGTCACAC-3'            |
| MMP9-F           | 5':TGAATCAGCTGGCTTTTGTG-3'            |

|                 |                                                |
|-----------------|------------------------------------------------|
| MMP9-R          | 5':GTGGATAGCTCGGTGGTGT-3'                      |
| TNF $\alpha$ -F | 5'-AATGGCCTCCCTCTCATCAGTT-3'                   |
| TNF $\alpha$ -R | 5'-CCACTTGGTGGTTTGCTACGA-3'                    |
| IL-6-F          | 5'-GATGCTACCAAAGTGGATATAATC-3'                 |
| IL-6-R          | 5'-GGTCCTTAGCCACTCCTTCTGTG-3'                  |
| Bcl2 F          | 5'-GATGACTTCTCTCGTCGCTACC-3'                   |
| BCL2 R          | 5'-CATCCCTGAAGAGTTCCTCCAC-3'                   |
| CXCL10-F        | 5'-TCTGAGTCCTCGCTCAAGTG-3'                     |
| CXCL10-R        | 5'-CCTTGGGAAGATGGTGGTTA-3'                     |
| CXCL12-F        | 5'-GCTCTGCATCAGTGACGGTA-3'                     |
| CXCL12-R        | 5'-TAATTACGGGTCAATGCACA-3'                     |
| IL-10-F         | 5'-CGGGAAGACAATAACTG-3'                        |
| IL-10-R         | 5'-CATTTCCGATAAGGCTTGG-3'                      |
| IL-1r-F         | 5'-AAGGATGTGGTGAAGGGTAAC-3'                    |
| IL-1r-R         | 5'-CTCACAGTGGGATGCGTTTC-3'                     |
| CCL4-F          | 5'-AACACCATGAAGCTCTGCGT-3'                     |
| CCL4-R          | 5'-AGAAACAGCAGGAAGTGGGA-3'                     |
| K263R F         | 5'GATGGGAGAAGATAAAATCCGGTTCAAACACATCACCCCC 3'  |
| K263R R         | 5'GGGGGTGATGTGTTTGAACCGGATTTTATCTTCTCCCATC 3'  |
| K265R F         | 5'GAAGATAAAATCAAGTTCGACACATCACCCCCCTGCAG 3'    |
| K265R R         | 5'CTGCAGGGGGGTGATGTGTCGGAACCTTGATTTTATCTTC 3'  |
| L340F F         | 5' GATGAATAAAGATGGGGTTTTTCATATCCGAGGGCCAAGG 3' |
| L340F R         | 5' CCTTGGCCCTCGGATATGAAAACCCCATCTTTATTCATC 3'  |
| S342T F         | 5' GATGGGGTTCTCATAACCGAGGGCCAAGGC 3'           |
| S342T R         | 5' GCCTTGGCCCTCGGTTATGAGAACCCCATC 3'           |
| L340F-342F      | 5' GATGGGGTTTTTCATAACCGAGGGCCAAGGC 3'          |
| L340F-342R      | 5' GCCTTGGCCCTCGGTTATGAAAACCCCATC 3'           |
| L340F-263 F     | 5' GATGGGAGAAGATAAAATCCGGTTCAAACACATCACCCCC 3' |
| L340F-263 R     | 5' GGGGGTGTGTTTGAACCGGATTTTATCTTCTCCCATC 3'    |

|                             |                                                                                                  |
|-----------------------------|--------------------------------------------------------------------------------------------------|
| L340F-265 F                 | 5' GAAGATAAAATCAAGTTCCGACACATCACCCCCCTGCAG 3'                                                    |
| L340F-265 R                 | 5' CTGCAGGGGGGTGATGTGTCGGAACCTTGATTTTATCTTC 3'                                                   |
| S342T-263 F                 | 5' GATGGGAGAAGATAAAATCCGGTTCAAACACATCACCCCC 3'                                                   |
| S342T-263 R                 | 5' GGGGGTGATGTGTTTGAACCGGATTTTATCTTCTCCCATC 3'                                                   |
| S342T-265 F                 | 5'GAAGATAAAATCAAGTTCCGACACATCACCCCCCTGCAG 3'                                                     |
| S342T-265 R                 | 5'CTGCAGGGGGGTGATGTGTCGGAACCTTGATTTTATCTTC 3'                                                    |
| L263R-265 F                 | 5'GAAGATAAAATCCGGTTCCGACACATCACCCCCCTGC 3'                                                       |
| L263R-265 R                 | 5'GCAGGGGGGTGATGTGTCGGAACCGGATTTTATCTTC 3'                                                       |
| LL/RR-340 F                 | 5'GATGAATAAAGATGGGGTTTTTCATATCCGAGGGCCAAG 3'                                                     |
| LL/RR-340 R                 | 5'CTTGGCCCTCGGATATGAAAACCCCATCTTTATTCATC 3'                                                      |
| LL/RR-342 F                 | 5' GATGGGGTTCTCATAACCGAGGGCCAAGGC 3'                                                             |
| LL/RR-342 R                 | 5' GCCTTGGCCCTCGGTTATGAGAACCCCATC 3'                                                             |
| LS/FT-263 F                 | 5'GATGGGAGAAGATAAAATCCGGTTCAAACACATCACCCCC 3'                                                    |
| LS/FT-263 R                 | 5'GGGGGTGATGTGTTTGAACCGGATTTTATCTTCTCCCATC 3'                                                    |
| LS/FT-265 F                 | 5'GAAGATAAAATCAAGTTCCGACACATCACCCCCCTGCAG 3'                                                     |
| LS/FT-265 R                 | 5'CTGCAGGGGGGTGATGTGTCGGAACCTTGATTTTATCTTC 3'                                                    |
| KKL/RRF F                   | 5' GATGGGGTTTTTCATAACCGAGGGCCAAGGC 3'                                                            |
| KKL/RRF R                   | 5' GCCTTGGCCCTCGGTTATGAAAACCCCATC 3'                                                             |
| IL-6-F                      | 5'-GAT GCT ACC AAA CTG GAT ATA ATC-3' ;                                                          |
| IL-6-R                      | 5'-GGT CCT TAG CCA CTC CTT CTG TG-3' ;                                                           |
| PPAR $\gamma$ 2-F           | 5'-GCC CTC GAG ATG TAC CCA TAC GAC GTC CCA GAC TAC GCT ATG GGT<br>GAA ACT CTG GG-3' ;            |
| PPAR $\gamma$ 2-R           | 5'-CCC GGT ACC CTA ATA CAA GTC CTT GTA GAT CTC C-3' ;                                            |
| PPAR $\gamma$ 2-DBD-AF2F    | 5'-GCC CTC GAG ATG TAC CCA TAC GAC GTC CCA GAC TAC GCT GAG TGC<br>CGA GTC TGT GGG GAT AAA G-3' ; |
| PPAR $\gamma$ 2-DBD-AF2-R   | 5'-CCC GGT ACC CTA ATA CAA GTC CTT GTA GAT CTC C-3' ;                                            |
| PPAR $\gamma$ 2-hinge-AF2-F | 5'-GCC CTC GAG ATG TAC CCA TAC GAC GTC CCA GAC TAC GCT GGG CGG<br>ATG CCA CAG GCC GAG AAG G-3' ; |
| PPAR $\gamma$ 2-hinge-AF2-R | 5'-CCC GGT ACC CTA ATA CAA GTC CTT GTA GAT CTC C-3' ;                                            |



---

|                       |                                                                        |
|-----------------------|------------------------------------------------------------------------|
| PPAR $\gamma$ 2-LBD-F | 5'-GCCCTCGAGATGTACCCATACGACGTCCCAGACTACGCTGCCGTGCAAG<br>AGA TCA C-3' ; |
| PPAR $\gamma$ 2-LBD-R | 5'-CCC GGT ACC CTA ATA CAA GTC CTT GTA GAT CTC C-3'                    |

---

**Table s6** : All genes in the RNA Seq

| GeneID                       | Length | HFD_Uniq_reads_num(3560937) | HFD_Coverage | HFD_RPKM | ND_Uniq_reads_num(3556951) | ND_Coverage | ND_RPKM  | Symbol  |
|------------------------------|--------|-----------------------------|--------------|----------|----------------------------|-------------|----------|---------|
| 14268                        | 8312   | 126089                      | 97.92%       | 4259.978 | 122628                     | 97.32%      | 4147.689 | Fn1     |
| 17105                        | 1057   | 68187                       | 95.65%       | 18116    | 78277                      | 95.65%      | 20820.03 | Lyz2    |
| 96875                        | 4278   | 52701                       | 90.98%       | 3459.504 | 64931                      | 92.03%      | 4267.106 | Prg4    |
| 18788                        | 2007   | 33126                       | 99.70%       | 4635.081 | 55120                      | 99.65%      | 7721.185 | Serpib2 |
| 11816                        | 1266   | 26943                       | 98.42%       | 5976.514 | 32634                      | 96.76%      | 7247.008 | Apoe    |
| 236598                       | 4730   | 26030                       | 94.31%       | 1545.428 | 8112                       | 91.99%      | 482.1575 | Rn28s1  |
| 14319                        | 866    | 25353                       | 99.19%       | 8221.426 | 30360                      | 99.65%      | 9856.12  | Fth1    |
| 21825                        | 5802   | 24302                       | 37.04%       | 1176.251 | 18944                      | 37.07%      | 917.9438 | Thbs1   |
| 56193                        | 4117   | 20938                       | 99.37%       | 1428.203 | 27091                      | 99.37%      | 1849.977 | Plek    |
| 20568                        | 894    | 17800                       | 81.43%       | 5591.37  | 14500                      | 81.43%      | 4559.871 | Slpi    |
| 18412                        | 2000   | 15118                       | 99.60%       | 2122.756 | 12820                      | 99.60%      | 1802.105 | Sqstm1  |
| gi 118131153 ref NM_007798.2 | 4738   | 14973                       | 83.39%       | 887.4614 | 16407                      | 83.41%      | 973.5455 | -       |
| 56619                        | 2519   | 14596                       | 99.05%       | 1627.202 | 16632                      | 99.29%      | 1856.258 | Clec4e  |
| 12475                        | 1497   | 14189                       | 99.73%       | 2661.74  | 18423                      | 99.53%      | 3459.877 | Cd14    |
| 17110                        | 1282   | 14084                       | 96.41%       | 3085.132 | 19583                      | 97.04%      | 4294.507 | Lyz1    |
| 16149                        | 1431   | 13005                       | 99.58%       | 2552.151 | 10131                      | 99.37%      | 1990.375 | Cd74    |
| 19225                        | 4150   | 12940                       | 99.98%       | 875.6325 | 15149                      | 99.98%      | 1026.261 | Ptgs2   |
| 16181                        | 2480   | 12208                       | 98.87%       | 1382.384 | 11325                      | 99.64%      | 1283.833 | Il1rn   |
| 16409                        | 4682   | 11938                       | 99.25%       | 716.0377 | 12947                      | 99.34%      | 777.4274 | Itgam   |
| 13058                        | 4752   | 11720                       | 99.56%       | 692.607  | 12342                      | 98.91%      | 730.1822 | Cybb    |
| 13629                        | 3126   | 11414                       | 97.63%       | 1025.3   | 9810                       | 97.63%      | 882.2    | Eef2    |

|        |       |       |        |              |       |        |              |                   |
|--------|-------|-------|--------|--------------|-------|--------|--------------|-------------------|
|        |       |       |        | 79           |       |        | 713          |                   |
| 13627  | 1790  | 11389 | 53.80% | 1786.7<br>68 | 11475 | 54.64% | 1802.<br>278 | Eef1a1            |
| 19156  | 2676  | 11241 | 97.94% | 1179.6<br>54 | 9706  | 97.46% | 1019.<br>709 | Psap              |
| 286940 | 9083  | 10726 | 99.24% | 331.62<br>27 | 10650 | 98.87% | 329.6<br>419 | Flnb              |
| 11687  | 2414  | 10431 | 99.96% | 1213.4<br>57 | 15934 | 99.67% | 1855.<br>708 | Alox15            |
| 20210  | 531   | 10109 | 99.81% | 5346.2<br>52 | 15795 | 99.81% | 8362.<br>714 | Saa3              |
| 16414  | 2862  | 9567  | 99.69% | 938.73<br>25 | 10753 | 99.30% | 1056.<br>287 | Itgb2             |
| 13601  | 1900  | 9466  | 98.63% | 1399.1       | 12586 | 99.26% | 1862.<br>328 | Ecm1              |
| 319269 | 3365  | 9412  | 70.70% | 785.47<br>53 | 10665 | 70.85% | 891.0<br>415 | A130040<br>M12Rik |
| 11461  | 1889  | 9243  | 98.04% | 1374.0<br>95 | 10068 | 98.15% | 1498.<br>419 | Actb              |
| 11303  | 10260 | 8993  | 99.80% | 246.14<br>61 | 5614  | 98.67% | 153.8<br>322 | Abca1             |
| 14964  | 1736  | 8944  | 83.76% | 1446.8<br>31 | 9689  | 83.81% | 1569.<br>103 | H2-D1             |
| 13033  | 1979  | 8943  | 98.74% | 1269.0<br>34 | 9684  | 99.49% | 1375.<br>723 | Ctsd              |
| 12010  | 858   | 8777  | 98.37% | 2872.7<br>28 | 9376  | 98.14% | 3072.<br>221 | B2m               |
| 18636  | 1524  | 8656  | 99.41% | 1595.0<br>27 | 10042 | 99.41% | 1852.<br>496 | Cfp               |
| 20310  | 1083  | 8258  | 98.34% | 2141.3<br>23 | 18691 | 98.52% | 4852.<br>06  | Cxcl2             |
| 19073  | 938   | 7723  | 99.89% | 2312.1<br>65 | 10094 | 99.89% | 3025.<br>398 | Srgn              |
| 16175  | 1974  | 7598  | 99.24% | 1080.9<br>06 | 16782 | 99.34% | 2390.<br>114 | Il1a              |
| 17159  | 4326  | 7564  | 80.17% | 491.02<br>17 | 7771  | 83.84% | 505.0<br>246 | Man2b1            |
| 22041  | 2332  | 7442  | 99.87% | 896.18<br>33 | 9724  | 99.66% | 1172.<br>299 | Trf               |
| 14325  | 986   | 7419  | 36.31% | 2113.0<br>23 | 8637  | 37.83% | 2462.<br>681 | Ft11              |
| 14824  | 2348  | 7215  | 97.06% | 862.92<br>68 | 7203  | 92.72% | 862.4<br>57  | Grn               |

|       |       |      |        |              |       |        |              |              |
|-------|-------|------|--------|--------------|-------|--------|--------------|--------------|
| 18458 | 2842  | 7106 | 98.56% | 702.16<br>12 | 7428  | 98.94% | 734.8<br>013 | Pabpc1       |
| 11988 | 7731  | 6864 | 98.69% | 249.33<br>16 | 5449  | 98.23% | 198.1<br>542 | Slc7a2       |
| 22352 | 1834  | 6854 | 99.45% | 1049.4<br>95 | 7759  | 98.85% | 1189.<br>402 | Vim          |
| 14828 | 2616  | 6324 | 99.39% | 678.87<br>5  | 6931  | 97.06% | 744.8<br>696 | Hspa5        |
| 16792 | 2402  | 6317 | 62.95% | 738.53<br>93 | 7787  | 63.24% | 911.4<br>215 | Laptm5       |
| 12491 | 3566  | 6266 | 91.33% | 493.45<br>18 | 5776  | 92.51% | 455.3<br>737 | Cd36         |
| 16412 | 4194  | 6070 | 94.49% | 406.43<br>96 | 6146  | 94.47% | 411.9<br>896 | Itgb1        |
| 14825 | 964   | 6002 | 98.03% | 1748.4<br>56 | 13594 | 99.38% | 3964.<br>536 | Cxcl1        |
| 12260 | 1062  | 5951 | 99.72% | 1573.6<br>25 | 8585  | 99.72% | 2272.<br>678 | C1qb         |
| 23849 | 4217  | 5922 | 97.42% | 394.36<br>7  | 9096  | 99.26% | 606.4<br>136 | Klf6         |
| 1E+08 | 2774  | 5830 | 48.99% | 590.19<br>81 | 8327  | 50.97% | 843.9<br>257 | Gm2251       |
| 12262 | 1063  | 5791 | 99.34% | 1529.8<br>75 | 7909  | 99.25% | 2091.<br>753 | C1qc         |
| 13733 | 3245  | 5707 | 99.41% | 493.88<br>85 | 6222  | 99.04% | 539.0<br>604 | Emr1         |
| 20308 | 3008  | 5661 | 98.17% | 528.50<br>74 | 5018  | 97.44% | 469.0<br>023 | Ccl9         |
| 72289 | 6982  | 5486 | 97.26% | 220.65<br>39 | 5479  | 97.05% | 220.6<br>193 | Malat1       |
| 12259 | 1082  | 5466 | 97.60% | 1418.6<br>59 | 8015  | 99.08% | 2082.<br>564 | C1qa         |
| 12702 | 2742  | 5411 | 94.16% | 554.17<br>35 | 9669  | 97.52% | 991.3<br>71  | Socs3        |
| 15516 | 2507  | 5366 | 99.60% | 601.07<br>97 | 5612  | 99.56% | 629.3<br>402 | Hsp90ab<br>1 |
| 26943 | 3694  | 5285 | 95.99% | 401.77<br>58 | 4597  | 96.81% | 349.8<br>644 | Serinc3      |
| 66395 | 18099 | 5268 | 81.36% | 81.738<br>54 | 5752  | 71.96% | 89.34<br>832 | Ahnak        |
| 67760 | 4645  | 5258 | 99.70% | 317.88<br>54 | 5025  | 99.33% | 304.1<br>392 | Slc38a2      |
| 15982 | 1836  | 5216 | 98.31% | 797.81<br>21 | 6988  | 99.07% | 1070.<br>046 | Ifrd1        |

|                                 |       |      |        |              |      |        |              |         |
|---------------------------------|-------|------|--------|--------------|------|--------|--------------|---------|
| 17474                           | 1336  | 5178 | 97.60% | 1088.4<br>07 | 6326 | 98.35% | 1331.<br>205 | Clec4d  |
| 15481                           | 2104  | 5072 | 91.87% | 676.96<br>97 | 5442 | 91.54% | 727.1<br>683 | Hspa8   |
| 14728                           | 1420  | 5001 | 83.73% | 989.01<br>81 | 6775 | 85.99% | 1341.<br>353 | Lilrb4  |
| 14972                           | 1669  | 4946 | 94.67% | 832.21<br>11 | 5236 | 95.93% | 881.9<br>936 | H2-K1   |
| 246707                          | 3910  | 4847 | 99.77% | 348.12<br>24 | 6244 | 99.85% | 448.9<br>606 | Emilin2 |
| 103784                          | 3431  | 4846 | 40.31% | 396.64<br>17 | 8987 | 27.51% | 736.4<br>04  | Wdr92   |
| 18033                           | 4128  | 4790 | 92.66% | 325.86<br>04 | 5438 | 90.41% | 370.3<br>579 | Nfkb1   |
| 16783                           | 2265  | 4741 | 93.20% | 587.81<br>07 | 4965 | 97.22% | 616.2<br>73  | Lamp1   |
| gi 47271503 ref N<br>M_007471.2 | 3140  | 4736 | 99.04% | 423.56<br>27 | 5284 | 99.24% | 473.1<br>025 | -       |
| 29875                           | 7377  | 4714 | 99.24% | 179.45<br>08 | 2966 | 98.29% | 113.0<br>351 | Iqgap1  |
| 67891                           | 1422  | 4701 | 91.42% | 928.38<br>13 | 5100 | 93.95% | 1008.<br>307 | Rpl4    |
| 24136                           | 9113  | 4691 | 95.82% | 144.55<br>72 | 4118 | 95.86% | 127.0<br>419 | Zeb2    |
| 14694                           | 1254  | 4620 | 97.05% | 1034.6<br>18 | 4694 | 95.06% | 1052.<br>368 | Gnb2l1  |
| 13040                           | 1373  | 4475 | 96.80% | 915.28<br>89 | 5257 | 98.54% | 1076.<br>439 | Ctss    |
| 12317                           | 1943  | 4457 | 96.19% | 644.17<br>75 | 4830 | 96.24% | 698.8<br>701 | Calr    |
| 20363                           | 2096  | 4451 | 92.51% | 596.35<br>11 | 3702 | 92.51% | 496.5<br>549 | Sepp1   |
| 22228                           | 4133  | 4444 | 65.50% | 301.95<br>65 | 4455 | 61.72% | 303.0<br>431 | Ucp2    |
| 53378                           | 2553  | 4367 | 98.82% | 480.36<br>14 | 4324 | 99.22% | 476.1<br>645 | Sdcbp   |
| gi 21450276 ref N<br>M_144900.1 | 3686  | 4366 | 97.23% | 332.63<br>21 | 3945 | 96.42% | 300.8<br>942 | -       |
| 17698                           | 3840  | 4338 | 99.64% | 317.24<br>44 | 3737 | 99.61% | 273.5<br>987 | Msn     |
| 75547                           | 12543 | 4305 | 84.28% | 96.384<br>55 | 3853 | 74.61% | 86.36<br>141 | Akap13  |
| 12508                           | 2802  | 4283 | 87.37% | 429.25<br>53 | 4539 | 85.76% | 455.4<br>222 | Cd53    |

|        |      |      |        |              |      |        |              |          |
|--------|------|------|--------|--------------|------|--------|--------------|----------|
| 22695  | 1765 | 4196 | 99.83% | 667.61<br>56 | 5067 | 99.83% | 807.1<br>018 | Zfp36    |
| 13690  | 7760 | 4181 | 80.91% | 151.30<br>53 | 3740 | 76.11% | 135.4<br>977 | Eif4g2   |
| 12983  | 4776 | 4165 | 91.69% | 244.89<br>87 | 3212 | 91.50% | 189.0<br>747 | Csf2rb   |
| 20305  | 1436 | 4140 | 99.30% | 809.62<br>07 | 3197 | 94.78% | 625.9<br>077 | Ccl6     |
| 18858  | 1801 | 4140 | 99.28% | 645.53<br>88 | 4654 | 99.28% | 726.4<br>986 | Pmp22    |
| 12978  | 3875 | 4125 | 95.64% | 298.94<br>27 | 4539 | 95.95% | 329.3<br>143 | Csf1r    |
| 14960  | 1084 | 4034 | 98.43% | 1045.0<br>63 | 3135 | 98.80% | 813.0<br>746 | H2-Aa    |
| 15368  | 1634 | 4025 | 94.55% | 691.75<br>06 | 3694 | 97%    | 635.5<br>752 | Hmox1    |
| 16432  | 1773 | 3980 | 99.21% | 630.39<br>11 | 4601 | 98.98% | 729.5<br>677 | Itm2b    |
| 320207 | 4363 | 3956 | 99.43% | 254.62<br>84 | 3766 | 98.35% | 242.6<br>706 | Pik3r5   |
| 108078 | 3581 | 3933 | 99.02% | 308.42<br>91 | 6208 | 99.11% | 487.3<br>82  | Olr1     |
| 13207  | 3520 | 3924 | 89.12% | 313.05<br>6  | 4405 | 88.92% | 351.8<br>239 | Ddx5     |
| 21938  | 4913 | 3899 | 99.55% | 222.86<br>52 | 4109 | 99.67% | 235.1<br>319 | Tnfrsf1b |
| 20970  | 4972 | 3887 | 98.41% | 219.54<br>28 | 3873 | 98.89% | 218.9<br>972 | Sdc3     |
| 13618  | 3989 | 3864 | 98.42% | 272.02<br>5  | 3893 | 98.45% | 274.3<br>737 | Ednrb    |
| 24088  | 2874 | 3852 | 97.98% | 376.38<br>75 | 6200 | 99.13% | 606.4<br>947 | Tlr2     |
| 17254  | 2813 | 3847 | 78.53% | 384.05<br>03 | 4178 | 76.79% | 417.5<br>619 | Slc3a2   |
| 20442  | 5784 | 3843 | 97.96% | 186.58<br>55 | 3576 | 99%    | 173.8<br>166 | St3gal1  |
| 12505  | 5654 | 3776 | 92.55% | 187.54<br>78 | 3970 | 94.39% | 197.4<br>044 | Cd44     |
| 102442 | 8655 | 3754 | 96.63% | 121.80<br>44 | 2964 | 97.33% | 96.27<br>937 | Dennd4a  |
| 11801  | 2037 | 3729 | 98.92% | 514.08<br>75 | 4464 | 98.97% | 616.1<br>058 | Cd51     |
| 19025  | 3674 | 3723 | 73.24% | 284.57<br>03 | 3815 | 70.96% | 291.9<br>292 | Ctsa     |

|                              |      |      |        |              |      |        |              |              |
|------------------------------|------|------|--------|--------------|------|--------|--------------|--------------|
| 15519                        | 2850 | 3713 | 94.18% | 365.86<br>07 | 4786 | 96.11% | 472.1<br>173 | Hsp90aa<br>1 |
| 21894                        | 8560 | 3693 | 96.95% | 121.15<br>5  | 3983 | 96.33% | 130.8<br>153 | Tln1         |
| 67972                        | 7130 | 3680 | 97.87% | 144.94<br>19 | 3042 | 97%    | 119.9<br>477 | Atp2b1       |
| 21346                        | 1382 | 3653 | 98.55% | 742.29<br>64 | 4276 | 98.12% | 869.8<br>648 | Tagln2       |
| 21452                        | 2061 | 3625 | 94.47% | 493.93<br>04 | 4043 | 94.76% | 551.5<br>03  | Tcn2         |
| 21817                        | 3549 | 3607 | 99.18% | 285.41<br>44 | 3093 | 98.48% | 245.0<br>169 | Tgm2         |
| 67300                        | 6178 | 3578 | 99.26% | 162.64<br>03 | 3068 | 99.35% | 139.6<br>142 | Cltc         |
| 21929                        | 4437 | 3577 | 96.89% | 226.39<br>42 | 5026 | 98.69% | 318.4<br>602 | Tnfaip3      |
| gi 110625993 ref NM_007972.3 | 2043 | 3521 | 99.90% | 483.98<br>66 | 4976 | 98.83% | 684.7<br>533 | -            |
| gi 255918222 ref NM_008416.2 | 1807 | 3442 | 97.73% | 534.91<br>95 | 5490 | 99.23% | 854.1<br>543 | -            |
| 56722                        | 2240 | 3439 | 98.35% | 431.14<br>15 | 3736 | 98.21% | 468.9<br>008 | Litaf        |
| 13681                        | 1897 | 3431 | 91.72% | 507.91<br>27 | 4571 | 91.67% | 677.4<br>325 | Eif4a1       |
| 18453                        | 2538 | 3423 | 99.61% | 378.74<br>86 | 3514 | 97.12% | 389.2<br>533 | P4hb         |
| 12522                        | 2163 | 3414 | 96.72% | 443.24<br>38 | 2503 | 95.15% | 325.3<br>317 | Cd83         |
| 21928                        | 3590 | 3411 | 97.83% | 266.82<br>28 | 4002 | 99.25% | 313.4<br>042 | Tnfaip2      |
| 20963                        | 5148 | 3393 | 98.83% | 185.08<br>92 | 2500 | 98.47% | 136.5<br>286 | Syk          |
| 60533                        | 3653 | 3366 | 98.25% | 258.76<br>18 | 2507 | 97.92% | 192.9<br>42  | Cd274        |
| 20620                        | 2802 | 3279 | 99.25% | 328.63<br>14 | 3235 | 98.97% | 324.5<br>849 | Plk2         |
| 16176                        | 1328 | 3277 | 99.77% | 692.96<br>94 | 5903 | 99.77% | 1249.<br>674 | Il1b         |
| 1E+08                        | 485  | 3275 | 98.35% | 1896.2<br>92 | 4469 | 98.56% | 2590.<br>543 | Wfdc17       |
| 13730                        | 2721 | 3273 | 98.35% | 337.79<br>5  | 3571 | 92.91% | 368.9<br>635 | Emp1         |
| 29876                        | 4065 | 3267 | 97.66% | 225.69<br>62 | 3186 | 97.66% | 220.3<br>471 | Clic4        |

|                              |       |      |        |          |      |        |          |         |
|------------------------------|-------|------|--------|----------|------|--------|----------|---------|
| 13010                        | 748   | 3253 | 99.20% | 1221.288 | 4289 | 99.47% | 1612.043 | Cst3    |
| 20302                        | 804   | 3229 | 96.14% | 1127.841 | 5218 | 97.76% | 1824.61  | Ccl3    |
| gi 120444899 ref NR_003278.1 | 1870  | 3223 | 87.33% | 484.0101 | 885  | 87.06% | 133.0527 | -       |
| 26570                        | 9227  | 3215 | 97.54% | 97.84895 | 2605 | 97.86% | 79.37237 | Slc7a11 |
| 20288                        | 3643  | 3195 | 97.56% | 246.2904 | 3410 | 97.94% | 263.1585 | Msr1    |
| 11911                        | 1749  | 3187 | 88.11% | 511.7148 | 4059 | 85.93% | 652.4562 | Atf4    |
| 57319                        | 1791  | 3182 | 97.26% | 498.9308 | 3347 | 98.05% | 525.3905 | Smpd3a  |
| 17246                        | 3027  | 3170 | 97.36% | 294.0916 | 4947 | 97.69% | 459.4641 | Mdm2    |
| 20397                        | 4133  | 3152 | 97.94% | 214.169  | 2640 | 97.56% | 179.5811 | Sgp11   |
| 235442                       | 4751  | 3100 | 98.04% | 183.2367 | 3608 | 97.92% | 213.5028 | Rab8b   |
| 16971                        | 14907 | 3094 | 93.93% | 58.2862  | 2945 | 86.93% | 55.54144 | Lrp1    |
| 14827                        | 2658  | 3091 | 75.77% | 326.5726 | 3299 | 76.19% | 348.939  | Pdia3   |
| 18830                        | 1806  | 3083 | 85.16% | 479.3928 | 2558 | 84.88% | 398.2034 | Pltp    |
| 21858                        | 3635  | 3081 | 96.45% | 238.0252 | 3482 | 96.23% | 269.3063 | Timp2   |
| 18035                        | 1592  | 3068 | 95.67% | 541.1878 | 6579 | 95.67% | 1161.82  | Nfkbia  |
| gi 6755455 ref NM_011347.1   | 3075  | 3065 | 83.48% | 279.9117 | 4250 | 83.54% | 388.567  | -       |
| 23872                        | 3560  | 3041 | 98.88% | 239.8845 | 3717 | 99.07% | 293.5382 | Ets2    |
| 232341                       | 10575 | 3014 | 92.37% | 80.03843 | 2243 | 88.66% | 59.63085 | Wnk1    |
| 17476                        | 4348  | 3013 | 98.16% | 194.6011 | 2956 | 98.53% | 191.1336 | Mpeg1   |
| 18712                        | 1769  | 2957 | 98.36% | 469.4174 | 3819 | 99.21% | 606.9375 | Pim1    |
| 55985                        | 1162  | 2944 | 99.57% | 711.4877 | 3353 | 98.54% | 811.2403 | Cxcl13  |
| 192176                       | 8371  | 2914 | 98.06% | 97.75701 | 2385 | 94.91% | 80.10012 | Flna    |



|        |      |      |        |              |      |        |              |              |
|--------|------|------|--------|--------------|------|--------|--------------|--------------|
| 11837  | 1360 | 2895 | 63.97% | 597.78<br>55 | 2990 | 61.54% | 618.0<br>938 | Rplp0        |
| 17158  | 6091 | 2889 | 99.16% | 133.19<br>71 | 2998 | 97.77% | 138.3<br>774 | Man2a1       |
| 14727  | 1305 | 2883 | 82.38% | 620.39<br>72 | 3669 | 82.38% | 790.4<br>225 | Gp49a        |
| 18024  | 2469 | 2880 | 94.29% | 327.57<br>23 | 2814 | 93.97% | 320.4<br>241 | Nfe212       |
| 13039  | 1971 | 2864 | 95.54% | 408.05<br>82 | 2740 | 90.36% | 390.8<br>283 | Cts1         |
| 50778  | 1343 | 2857 | 95.38% | 597.40<br>65 | 3120 | 97.24% | 653.1<br>316 | Rgs1         |
| 26364  | 3253 | 2828 | 94.10% | 244.13<br>56 | 2715 | 94.13% | 234.6<br>432 | Cd97         |
| 80719  | 2133 | 2816 | 99.81% | 370.74<br>69 | 3773 | 99.86% | 497.2<br>996 | Igsf6        |
| 20556  | 1684 | 2811 | 98.28% | 468.76<br>42 | 4618 | 99.64% | 770.9<br>638 | Slfn2        |
| 75612  | 3855 | 2807 | 98.70% | 204.48<br>14 | 2035 | 97.54% | 148.4<br>097 | Gns          |
| 16451  | 5299 | 2776 | 91.26% | 147.11<br>65 | 2197 | 90.77% | 116.5<br>623 | Jak1         |
| 22027  | 2759 | 2770 | 99.42% | 281.94<br>46 | 2713 | 99.35% | 276.4<br>523 | Hsp90b1      |
| 19141  | 1874 | 2766 | 99.79% | 414.49<br>4  | 2278 | 99.89% | 341.7<br>482 | Lgmn         |
| 16784  | 3603 | 2763 | 97.95% | 215.35<br>37 | 3040 | 98.64% | 237.2<br>092 | Lamp2        |
| 216799 | 4021 | 2748 | 96.72% | 191.91<br>92 | 4374 | 97.56% | 305.8<br>207 | Nlrp3        |
| 17069  | 2281 | 2740 | 70.14% | 337.33<br>47 | 2529 | 66.07% | 311.7<br>064 | Ly6e         |
| 20020  | 5799 | 2729 | 99.59% | 132.15<br>58 | 2027 | 96.74% | 98.27<br>041 | Polr2a       |
| 20658  | 8451 | 2708 | 99.07% | 89.986<br>27 | 2412 | 99.03% | 80.24<br>007 | Son          |
| 15211  | 1865 | 2703 | 98.61% | 407.00<br>8  | 3053 | 99.14% | 460.2<br>249 | Hexa         |
| 19261  | 4007 | 2701 | 98.43% | 189.29<br>58 | 2102 | 95.26% | 147.4<br>808 | Sirpa        |
| 17164  | 2586 | 2661 | 98.18% | 288.96<br>95 | 2948 | 98.99% | 320.4<br>949 | Mapkapk<br>2 |
| 329679 | 7095 | 2635 | 96.25% | 104.29<br>51 | 2389 | 97.45% | 94.66<br>422 | Fnip2        |

|                                 |       |      |        |              |      |        |              |         |
|---------------------------------|-------|------|--------|--------------|------|--------|--------------|---------|
| 105727                          | 7752  | 2631 | 96.36% | 95.310<br>95 | 2224 | 94.13% | 80.65<br>72  | Slc38a1 |
| 353310                          | 3320  | 2629 | 99.58% | 222.37<br>62 | 3114 | 99.55% | 263.6<br>955 | Zfp703  |
| 14182                           | 5008  | 2606 | 97.44% | 146.13<br>22 | 2945 | 98.32% | 165.3<br>267 | Fgfr1   |
| 17210                           | 3498  | 2600 | 50.20% | 208.73<br>21 | 3414 | 50.31% | 274.3<br>885 | Mcl1    |
| 54446                           | 13451 | 2596 | 97.08% | 54.198<br>32 | 1730 | 90.98% | 36.15<br>877 | Nfat5   |
| 19271                           | 7634  | 2574 | 85.29% | 94.687<br>38 | 2444 | 83.93% | 90.00<br>594 | Ptprj   |
| 12514                           | 1008  | 2565 | 97.72% | 714.59<br>92 | 3096 | 99.70% | 863.5<br>004 | Cd68    |
| gi 133892386 ref NM_009438.4    | 803   | 2559 | 98.75% | 894.93<br>29 | 2477 | 98.75% | 867.2<br>266 | -       |
| 70834                           | 7365  | 2552 | 97.34% | 97.306<br>9  | 2464 | 95.47% | 94.05<br>677 | Spag9   |
| 12524                           | 2539  | 2547 | 97.48% | 281.70<br>98 | 2197 | 97.76% | 243.2<br>705 | Cd86    |
| 16153                           | 1306  | 2544 | 98.47% | 547.02<br>81 | 6559 | 98.55% | 1411.<br>941 | Il10    |
| 65221                           | 2345  | 2543 | 96.89% | 304.53<br>64 | 2687 | 97.10% | 322.1<br>417 | Slc15a3 |
| 240354                          | 5008  | 2538 | 99%    | 142.31<br>9  | 1714 | 97.86% | 96.22<br>072 | Malt1   |
| 52120                           | 2679  | 2511 | 99.03% | 263.21<br>44 | 2470 | 97.76% | 259.2<br>068 | Hgsnat  |
| 11669                           | 2207  | 2503 | 90.17% | 318.48<br>88 | 2958 | 92.03% | 376.8<br>061 | Aldh2   |
| 12768                           | 2831  | 2464 | 99.36% | 244.41<br>99 | 3396 | 99.58% | 337.2<br>484 | Ccr1    |
| gi 124487032 ref NM_001081379.1 | 8996  | 2464 | 97.95% | 76.917<br>82 | 2376 | 97.22% | 74.25<br>387 | -       |
| 12313                           | 4001  | 2460 | 91.83% | 172.66<br>42 | 2726 | 92.43% | 191.5<br>488 | Calm1   |
| gi 229577448 ref NM_030701.2    | 1938  | 2457 | 99.38% | 356.03<br>04 | 3147 | 99.38% | 456.5<br>255 | -       |
| 12330                           | 4292  | 2446 | 96.04% | 160.04<br>14 | 2459 | 96.32% | 161.0<br>723 | Canx    |
| 12633                           | 6926  | 2445 | 83.28% | 99.136<br>16 | 4062 | 85.88% | 164.8<br>844 | Cflar   |
| 15526                           | 3067  | 2421 | 97%    | 221.67<br>5  | 2310 | 97.62% | 211.7<br>485 | Hspa9   |

|        |       |      |        |              |      |        |              |         |
|--------|-------|------|--------|--------------|------|--------|--------------|---------|
| 67963  | 3278  | 2417 | 93.08% | 207.06<br>34 | 2733 | 91.92% | 234.3<br>974 | Npc2    |
| 99929  | 4154  | 2410 | 92.90% | 162.92<br>44 | 3880 | 91.41% | 262.5<br>955 | Tiparp  |
| 94176  | 6291  | 2407 | 99.62% | 107.44<br>65 | 1949 | 98.24% | 87.09<br>922 | Dock2   |
| 17975  | 8257  | 2397 | 90.34% | 81.523<br>25 | 2354 | 87.72% | 80.15<br>051 | Ncl     |
| 107932 | 6438  | 2395 | 97.95% | 104.46<br>97 | 2192 | 98.62% | 95.72<br>198 | Chd4    |
| 27050  | 1879  | 2388 | 84.78% | 356.89<br>73 | 2367 | 75.73% | 354.1<br>552 | Rps3    |
| 20848  | 4487  | 2381 | 74.35% | 149.01<br>81 | 2330 | 73.72% | 145.9<br>896 | Stat3   |
| 80752  | 3001  | 2381 | 99.83% | 222.80<br>71 | 2207 | 99.47% | 206.7<br>562 | Fam20c  |
| 12267  | 4299  | 2377 | 98.30% | 155.27<br>35 | 2704 | 98.05% | 176.8<br>322 | C3ar1   |
| 64138  | 1393  | 2363 | 98.78% | 476.37<br>43 | 2631 | 97.70% | 530.9<br>967 | Ctsz    |
| 20103  | 768   | 2350 | 97.79% | 859.29<br>51 | 2774 | 96.22% | 1015.<br>471 | Rps5    |
| 11426  | 17637 | 2336 | 81.27% | 37.194<br>94 | 1652 | 60.91% | 26.33<br>343 | Macf1   |
| 12984  | 4619  | 2336 | 91.06% | 142.02<br>36 | 2119 | 90%    | 128.9<br>749 | Csf2rb2 |
| 18301  | 1144  | 2326 | 90.03% | 570.97<br>8  | 3037 | 93.18% | 746.3<br>472 | Fxyd5   |
| 14961  | 1193  | 2325 | 96.81% | 547.29<br>09 | 1822 | 95.89% | 429.3<br>684 | H2-Ab1  |
| 18220  | 2639  | 2320 | 94.16% | 246.87<br>91 | 2624 | 95.11% | 279.5<br>417 | Nucb1   |
| 11964  | 3946  | 2309 | 99.65% | 164.32<br>46 | 1840 | 98.94% | 131.0<br>94  | Atp6v1a |
| 15081  | 1993  | 2305 | 73.16% | 324.78<br>75 | 3206 | 77.07% | 452.2<br>498 | H3f3b   |
| 20656  | 3824  | 2296 | 98.12% | 168.61<br>25 | 3158 | 98.33% | 232.1<br>755 | Sod2    |
| 50493  | 3634  | 2296 | 94.88% | 177.42<br>82 | 2730 | 95.62% | 211.2<br>029 | Txnrd1  |
| 12192  | 2984  | 2286 | 98.76% | 215.13<br>6  | 2443 | 99.03% | 230.1<br>69  | Zfp361l |
| 14969  | 1669  | 2284 | 87.84% | 384.30<br>45 | 1729 | 88.56% | 291.2<br>465 | H2-Eb1  |

|                              |       |      |        |              |      |        |              |         |
|------------------------------|-------|------|--------|--------------|------|--------|--------------|---------|
| 216161                       | 4679  | 2277 | 97.91% | 136.66<br>13 | 3004 | 97.97% | 180.4<br>966 | Sbno2   |
| 28146                        | 2457  | 2277 | 92.88% | 260.25<br>17 | 2035 | 93.28% | 232.8<br>528 | Serp1   |
| 20893                        | 3113  | 2248 | 92.77% | 202.79<br>3  | 2917 | 96.40% | 263.4<br>386 | Bhlhe40 |
| 15937                        | 1090  | 2219 | 99.72% | 571.69<br>78 | 3100 | 99.91% | 799.5<br>715 | Ier3    |
| 17355                        | 8323  | 2206 | 98.07% | 74.432<br>28 | 1912 | 96.43% | 64.58<br>477 | Aff1    |
| 12013                        | 5858  | 2202 | 98.82% | 105.56<br>1  | 2355 | 97.99% | 113.0<br>222 | Bach1   |
| 110213                       | 2612  | 2190 | 94.41% | 235.45<br>43 | 2302 | 92.11% | 247.7<br>732 | Tmbim6  |
| 11987                        | 7195  | 2189 | 97.67% | 85.437<br>92 | 1442 | 94.02% | 56.34<br>516 | Slc7a1  |
| 56744                        | 615   | 2180 | 91.54% | 995.44<br>46 | 3099 | 92.03% | 1416.<br>67  | Pf4     |
| 227737                       | 3693  | 2177 | 97.32% | 165.54<br>45 | 2376 | 97.48% | 180.8<br>795 | Fam129b |
| 59027                        | 4547  | 2166 | 94.02% | 133.77<br>32 | 2364 | 97.05% | 146.1<br>654 | Nampt   |
| gi 118130633 ref NM_008879.3 | 3714  | 2165 | 91.84% | 163.70<br>11 | 1594 | 92.35% | 120.6<br>614 | -       |
| gi 40254524 ref NM_022314.2  | 1906  | 2164 | 82.74% | 318.83<br>8  | 2429 | 82.90% | 358.2<br>834 | -       |
| 239217                       | 6076  | 2160 | 96.99% | 99.832<br>44 | 2933 | 96.87% | 135.7<br>114 | Kctd12  |
| 229663                       | 4201  | 2152 | 95.93% | 143.85<br>51 | 2346 | 95.93% | 156.9<br>992 | Csde1   |
| 102595                       | 3327  | 2137 | 98.26% | 180.37<br>96 | 1987 | 98.56% | 167.9<br>064 | Plekho2 |
| 56726                        | 2856  | 2124 | 96.78% | 208.84<br>88 | 1914 | 96.81% | 188.4<br>108 | Sh3bgrl |
| gi 118130220 ref NM_146194.3 | 3659  | 2119 | 96.58% | 162.63<br>13 | 2372 | 96.37% | 182.2<br>529 | -       |
| 192662                       | 2732  | 2115 | 67.97% | 217.40<br>29 | 2090 | 75.77% | 215.0<br>739 | Arhgdia |
| 104831                       | 5384  | 2114 | 98.18% | 110.26<br>45 | 2240 | 98.55% | 116.9<br>675 | Ptpn23  |
| 18129                        | 10506 | 2103 | 95.41% | 56.213<br>11 | 1864 | 91.26% | 49.88<br>048 | Notch2  |
| 70223                        | 2663  | 2097 | 97.78% | 221.13<br>78 | 2133 | 97.63% | 225.1<br>862 | Nars    |

|                              |       |      |        |              |      |        |              |              |
|------------------------------|-------|------|--------|--------------|------|--------|--------------|--------------|
| gi 164519064 ref NM_009861.2 | 2129  | 2077 | 97.79% | 273.96<br>59 | 2216 | 97.75% | 292.6<br>282 | -            |
| 14645                        | 2782  | 2072 | 96.33% | 209.15<br>5  | 2681 | 96.30% | 270.9<br>329 | Glul         |
| 59026                        | 14637 | 2067 | 90.30% | 39.657<br>39 | 1357 | 74.11% | 26.06<br>453 | Huwei1       |
| 72042                        | 1642  | 2059 | 97.81% | 352.14<br>29 | 2408 | 96.71% | 412.2<br>925 | Cotl1        |
| 19039                        | 2168  | 2055 | 99.77% | 266.18<br>79 | 2248 | 99.86% | 291.5<br>138 | Lgals3bp     |
| 16822                        | 3348  | 2037 | 97.73% | 170.86<br>03 | 2128 | 96.65% | 178.6<br>933 | Lcp2         |
| 14674                        | 6217  | 2036 | 97.62% | 91.967<br>13 | 1911 | 97.89% | 86.41<br>755 | Gna13        |
| 12575                        | 1936  | 2029 | 93.54% | 294.31<br>5  | 2851 | 93.70% | 414.0<br>13  | Cdkn1a       |
| 17872                        | 2345  | 2021 | 90.49% | 242.02<br>44 | 2213 | 90.28% | 265.3<br>143 | Ppp1r15<br>a |
| 11674                        | 1597  | 2016 | 98.06% | 354.50<br>41 | 1935 | 96.99% | 340.6<br>42  | Aldoa        |
| 21803                        | 2094  | 2016 | 98.90% | 270.36<br>44 | 1926 | 97.18% | 258.5<br>84  | Tgfb1        |
| 50790                        | 5280  | 2014 | 95.89% | 107.11<br>77 | 1598 | 95.85% | 85.08<br>734 | Acsl4        |
| 20452                        | 5437  | 2012 | 98.69% | 103.92<br>12 | 1288 | 96.87% | 66.60<br>068 | St8sia4      |
| 20014                        | 2716  | 1981 | 91.09% | 204.82<br>85 | 2039 | 90.68% | 211.0<br>618 | Rpn2         |
| 67702                        | 2440  | 1975 | 98.57% | 227.30<br>71 | 2454 | 97.30% | 282.7<br>528 | Rnf149       |
| 18550                        | 4286  | 1961 | 97.32% | 128.48<br>76 | 1969 | 96.62% | 129.1<br>563 | Furin        |
| 19205                        | 2949  | 1952 | 92.98% | 185.88<br>35 | 2163 | 92.78% | 206.2<br>072 | Ptbp1        |
| 11605                        | 3032  | 1947 | 95.05% | 180.33<br>19 | 1770 | 96.41% | 164.1<br>218 | Gla          |
| 18578                        | 4371  | 1939 | 79.78% | 124.57<br>55 | 2832 | 79.89% | 182.1<br>523 | Pde4b        |
| 13669                        | 5176  | 1925 | 96.52% | 104.44<br>13 | 1984 | 95.48% | 107.7<br>63  | Eif3a        |
| 53872                        | 6181  | 1925 | 70.34% | 87.459<br>64 | 1456 | 66.56% | 66.22<br>542 | Caprin1      |
| 230257                       | 6880  | 1917 | 94.53% | 78.247<br>3  | 1763 | 95.15% | 72.04<br>204 | Rod1         |

|                                 |       |      |        |              |      |        |              |              |
|---------------------------------|-------|------|--------|--------------|------|--------|--------------|--------------|
| 110611                          | 6238  | 1914 | 99.21% | 86.165<br>27 | 1666 | 97.96% | 75.08<br>475 | Hdlbp        |
| gi 23956221 ref N<br>M_023735.1 | 2525  | 1906 | 98.53% | 211.98<br>11 | 1893 | 99.13% | 210.7<br>712 | -            |
| 11938                           | 5763  | 1888 | 95.04% | 92.000<br>27 | 1621 | 92.38% | 79.07<br>815 | Atp2a2       |
| 26949                           | 2732  | 1878 | 99.60% | 193.04<br>15 | 1609 | 98.90% | 165.5<br>76  | Vat1         |
| 17155                           | 3889  | 1863 | 95.76% | 134.52<br>74 | 1411 | 95.68% | 102.0<br>026 | Man1a        |
| 22339                           | 3547  | 1857 | 97.46% | 147.02<br>34 | 1244 | 95.24% | 98.60<br>1   | Vegfa        |
| 76709                           | 1597  | 1857 | 96.74% | 326.54<br>47 | 2004 | 98.56% | 352.7<br>889 | Arpc2        |
| 81898                           | 6192  | 1852 | 86.27% | 83.993<br>51 | 2056 | 86.60% | 93.34<br>999 | Sf3b1        |
| 56336                           | 4205  | 1838 | 94.48% | 122.74<br>82 | 2283 | 95.39% | 152.6<br>378 | B4galt5      |
| 59079                           | 6602  | 1836 | 93.99% | 78.096<br>73 | 1654 | 93.59% | 70.43<br>396 | Erbp2ip      |
| 66054                           | 2152  | 1828 | 94.05% | 238.54<br>46 | 2002 | 95.03% | 261.5<br>435 | Cndp2        |
| gi 92110036 ref N<br>M_020027.2 | 6772  | 1825 | 97.40% | 75.680<br>09 | 1402 | 96.74% | 58.20<br>405 | -            |
| 22177                           | 586   | 1822 | 99.83% | 873.14<br>52 | 2282 | 97.78% | 1094.<br>813 | Tyrobp       |
| 93736                           | 10165 | 1813 | 93.18% | 50.087<br>13 | 1312 | 87.47% | 36.28<br>679 | Aff4         |
| 13660                           | 3182  | 1804 | 99.06% | 159.21<br>06 | 2244 | 98.71% | 198.2<br>644 | Ehd1         |
| 60595                           | 3859  | 1803 | 92.74% | 131.20<br>69 | 1800 | 90.93% | 131.1<br>354 | Actn4        |
| 11933                           | 1833  | 1802 | 98.53% | 276.07<br>56 | 1911 | 99.40% | 293.1<br>031 | Atp1b3       |
| 11966                           | 2742  | 1798 | 98.29% | 184.14<br>42 | 1692 | 98.40% | 173.4<br>822 | Atp6v1b<br>2 |
| 216850                          | 6654  | 1790 | 97.43% | 75.545<br>04 | 2827 | 97.29% | 119.4<br>442 | Kdm6b        |
| 56040                           | 468   | 1788 | 66.24% | 1072.8<br>95 | 1848 | 66.24% | 1110.<br>141 | Rplp1        |
| 26961                           | 862   | 1787 | 62.30% | 582.17<br>43 | 2058 | 62.06% | 671.2<br>128 | Rpl8         |
| 11947                           | 1879  | 1786 | 93.13% | 266.92<br>57 | 1966 | 95.90% | 294.1<br>568 | Atp5b        |

|                                 |      |      |        |              |      |        |              |              |
|---------------------------------|------|------|--------|--------------|------|--------|--------------|--------------|
| 233871                          | 3764 | 1785 | 95.64% | 133.17<br>55 | 1459 | 95.43% | 108.9<br>752 | Atxn2l       |
| 67437                           | 2885 | 1781 | 96.60% | 173.36<br>2  | 1725 | 97.57% | 168.0<br>991 | Ssr3         |
| 74617                           | 2087 | 1769 | 96.89% | 238.03<br>52 | 1773 | 97.17% | 238.8<br>407 | Scepl        |
| 21969                           | 3859 | 1765 | 99.51% | 128.44<br>16 | 2745 | 99.61% | 199.9<br>814 | Top1         |
| 75705                           | 3871 | 1759 | 95.04% | 127.60<br>81 | 1493 | 94.68% | 108.4<br>323 | Eif4b        |
| 212943                          | 5479 | 1741 | 97.21% | 89.234<br>58 | 1294 | 96.81% | 66.39<br>801 | Fam46a       |
| gi 31981561 ref N<br>M_011099.2 | 2212 | 1740 | 82.82% | 220.90<br>21 | 1840 | 83.14% | 233.8<br>594 | -            |
| 74440                           | 4539 | 1739 | 94.27% | 107.59<br>08 | 1810 | 94.78% | 112.1<br>09  | Cmip         |
| 14569                           | 2681 | 1738 | 90.82% | 182.04<br>92 | 1648 | 88.96% | 172.8<br>154 | Gdi2         |
| 11973                           | 1219 | 1736 | 98.61% | 399.92<br>79 | 2065 | 98.69% | 476.2<br>538 | Atp6v1e<br>1 |
| 54519                           | 2540 | 1723 | 98.54% | 190.49<br>66 | 1798 | 98.94% | 199.0<br>115 | Apbb1ip      |
| 54199                           | 2110 | 1721 | 99.91% | 229.05<br>2  | 3014 | 99.29% | 401.5<br>9   | Ccr12        |
| 74383                           | 4073 | 1720 | 96.02% | 118.59<br>05 | 1395 | 96.07% | 96.29<br>016 | Ubp2l        |
| 69710                           | 5837 | 1719 | 93.27% | 82.703<br>12 | 1423 | 94.67% | 68.53<br>893 | Arap1        |
| 19730                           | 3777 | 1718 | 88.14% | 127.73<br>56 | 1593 | 89.38% | 118.5<br>744 | Ralgds       |
| 21810                           | 2678 | 1702 | 99.55% | 178.47<br>8  | 2217 | 99.55% | 232.7<br>433 | Tgfb1        |
| 14067                           | 7406 | 1688 | 15.92% | 64.006<br>55 | 2100 | 16.08% | 79.71<br>824 | F5           |
| 16828                           | 1854 | 1686 | 85.17% | 255.37<br>8  | 2004 | 87.49% | 303.8<br>856 | Ldha         |
| 11857                           | 1100 | 1685 | 98.73% | 430.17<br>28 | 1888 | 99.55% | 482.5<br>379 | Arhgdib      |
| 210293                          | 7303 | 1684 | 96.06% | 64.755<br>48 | 988  | 93.91% | 38.03<br>45  | Dock10       |
| 18173                           | 2304 | 1678 | 97.74% | 204.52<br>44 | 1815 | 98.22% | 221.4<br>707 | Slc11a1      |
| 16543                           | 3435 | 1668 | 99.33% | 136.36<br>57 | 1179 | 95.66% | 96.49<br>597 | Mdfic        |

|        |       |      |        |              |      |        |              |              |
|--------|-------|------|--------|--------------|------|--------|--------------|--------------|
| 13209  | 6065  | 1668 | 94.91% | 77.232<br>65 | 1480 | 93.77% | 68.60<br>457 | Ddx6         |
| 19252  | 1952  | 1667 | 98.41% | 239.82<br>34 | 1270 | 98.31% | 182.9<br>136 | Dusp1        |
| 237542 | 7152  | 1666 | 98.11% | 65.415<br>88 | 1171 | 97.12% | 46.03<br>112 | Osbpl8       |
| 53599  | 2830  | 1665 | 98.66% | 165.22<br>03 | 1537 | 99.33% | 152.6<br>896 | Cd164        |
| 12331  | 2393  | 1661 | 99.79% | 194.92<br>28 | 1426 | 99.12% | 167.5<br>325 | Cap1         |
| 216238 | 7836  | 1641 | 96.29% | 58.809<br>82 | 1289 | 91.59% | 46.24<br>668 | Eea1         |
| 21366  | 6169  | 1638 | 98.59% | 74.564<br>97 | 1384 | 97.52% | 63.07<br>299 | Slc6a6       |
| 56758  | 5580  | 1637 | 77.08% | 82.385<br>39 | 1316 | 78.12% | 66.30<br>462 | Mbnl1        |
| 56486  | 1122  | 1625 | 78.61% | 406.72<br>06 | 1711 | 78.52% | 428.7<br>255 | Gabarap      |
| 11658  | 4979  | 1622 | 96%    | 91.483<br>85 | 1274 | 94.34% | 71.93<br>652 | Alcam        |
| 234734 | 4891  | 1622 | 78.16% | 93.129<br>85 | 1491 | 74.30% | 85.70<br>42  | Aars         |
| 57261  | 5948  | 1620 | 97.76% | 76.485<br>62 | 1452 | 98.50% | 68.63<br>06  | Brd4         |
| 108954 | 5588  | 1618 | 95.85% | 81.312<br>6  | 1652 | 95.28% | 83.11<br>43  | Ppp1r15<br>b |
| 54445  | 2277  | 1617 | 97.10% | 199.42<br>64 | 1436 | 96.71% | 177.3<br>02  | Unc93b1      |
| 15950  | 3633  | 1607 | 69.94% | 124.21<br>85 | 2375 | 69.50% | 183.7<br>893 | Ifi203       |
| 225363 | 3718  | 1606 | 95.62% | 121.30<br>31 | 2012 | 97.01% | 152.1<br>391 | Etf1         |
| 15186  | 2378  | 1604 | 99.24% | 189.42<br>1  | 1164 | 99.16% | 137.6<br>142 | Hdc          |
| 22154  | 2645  | 1601 | 97.09% | 169.98<br>14 | 1306 | 96.11% | 138.8<br>16  | Tubb5        |
| 20249  | 4844  | 1597 | 96.74% | 92.584<br>12 | 847  | 93.64% | 49.15<br>881 | Scd1         |
| 56378  | 879   | 1595 | 96.13% | 509.57<br>43 | 1625 | 88.74% | 519.7<br>406 | Arpc3        |
| 13424  | 14398 | 1576 | 88.13% | 30.739       | 1028 | 67.87% | 20.07<br>304 | Dync1h1      |
| 19052  | 1930  | 1571 | 98.55% | 228.58<br>86 | 1663 | 98.81% | 242.2<br>462 | Ppp2ca       |



|       |       |      |        |              |      |        |              |               |
|-------|-------|------|--------|--------------|------|--------|--------------|---------------|
| 16401 | 9833  | 1569 | 91.44% | 44.809<br>76 | 1174 | 86.07% | 33.56<br>635 | Itga4         |
| 67951 | 1807  | 1568 | 95.96% | 243.68<br>21 | 2466 | 96.46% | 383.6<br>693 | Tubb6         |
| 11867 | 1555  | 1568 | 91.45% | 283.17<br>27 | 1704 | 91.70% | 308.0<br>784 | Arpc1b        |
| 65972 | 997   | 1559 | 97.09% | 439.12<br>35 | 1614 | 97.29% | 455.1<br>248 | Ifi30         |
| 16410 | 7054  | 1549 | 97.15% | 61.666<br>84 | 939  | 91.41% | 37.42<br>418 | Itgav         |
| 23994 | 1860  | 1548 | 89.57% | 233.71<br>88 | 1493 | 88.92% | 225.6<br>675 | Dazap2        |
| 18985 | 2566  | 1548 | 99.42% | 169.41<br>43 | 994  | 98.71% | 108.9<br>06  | Pou2af1       |
| 73158 | 6617  | 1548 | 92.07% | 65.697       | 1273 | 92.69% | 54.08<br>656 | Larp1         |
| 12484 | 1825  | 1545 | 98.74% | 237.73<br>95 | 2589 | 98.96% | 398.8<br>332 | Cd24a         |
| 66222 | 1931  | 1543 | 96.89% | 224.39<br>82 | 1480 | 96.89% | 215.4<br>773 | Serpinb1<br>a |
| 11910 | 1981  | 1542 | 97.58% | 218.59<br>27 | 1361 | 95.41% | 193.1<br>505 | Atf3          |
| 67434 | 7498  | 1540 | 96.57% | 57.678<br>11 | 1303 | 96.19% | 48.85<br>636 | Ankrd33<br>b  |
| 14679 | 3211  | 1530 | 97.51% | 133.80<br>95 | 1692 | 97.79% | 148.1<br>434 | Gnai3         |
| 14897 | 9632  | 1529 | 93.18% | 44.578<br>63 | 1102 | 90.92% | 32.16<br>527 | Trip12        |
| 69188 | 7258  | 1526 | 86.83% | 59.043<br>66 | 1069 | 82.24% | 41.40<br>787 | Mll5          |
| 18810 | 15455 | 1524 | 81.05% | 27.691<br>83 | 993  | 59.33% | 18.06<br>352 | Plec          |
| 12226 | 5010  | 1523 | 73.07% | 85.368<br>55 | 1168 | 72.53% | 65.54<br>314 | Btg1          |
| 19084 | 3323  | 1523 | 98.71% | 128.70<br>79 | 1331 | 99.10% | 112.6<br>082 | Prkar1a       |
| 15894 | 2540  | 1520 | 98.54% | 168.05<br>27 | 2836 | 97.09% | 313.9<br>024 | Icam1         |
| 11690 | 872   | 1517 | 98.05% | 488.54<br>53 | 1970 | 98.05% | 635.1<br>435 | Alox5ap       |
| 14127 | 683   | 1517 | 93.27% | 623.73<br>57 | 1893 | 94.73% | 779.2<br>055 | Fcer1g        |
| 70599 | 5109  | 1513 | 99.08% | 83.164<br>64 | 1167 | 97.10% | 64.21<br>804 | Ssfa2         |

|                             |       |      |        |              |      |        |              |                 |
|-----------------------------|-------|------|--------|--------------|------|--------|--------------|-----------------|
| 13032                       | 2472  | 1511 | 97.33% | 171.65<br>31 | 1746 | 97.73% | 198.5<br>719 | Ctsc            |
| 13830                       | 2816  | 1509 | 97.94% | 150.48<br>47 | 1306 | 97.94% | 130.3<br>865 | Stom            |
| 56644                       | 2277  | 1508 | 80.98% | 185.98<br>33 | 2333 | 81.38% | 288.0<br>539 | Clec7a          |
| 233789                      | 15553 | 1505 | 85.81% | 27.174<br>28 | 920  | 60.91% | 16.63<br>013 | Smg1            |
| 17748                       | 583   | 1503 | 84.73% | 723.97<br>93 | 2548 | 90.74% | 1228.<br>72  | Mt1             |
| 216742                      | 6281  | 1493 | 95.89% | 66.752<br>38 | 1308 | 95%    | 58.54<br>652 | Fnip1           |
| 226562                      | 10444 | 1489 | 95.73% | 40.037<br>19 | 1069 | 91.18% | 28.77<br>617 | Prrc2c          |
| 71795                       | 6350  | 1486 | 99.10% | 65.717<br>46 | 1515 | 98.72% | 67.07<br>505 | Pitpnc1         |
| 105559                      | 4579  | 1485 | 95.37% | 91.073<br>39 | 1467 | 94.78% | 90.07<br>03  | Mbnl2           |
| 327987                      | 11787 | 1476 | 85.18% | 35.165<br>66 | 1570 | 84.41% | 37.44<br>713 | Med13           |
| 26373                       | 4063  | 1474 | 98.33% | 101.87<br>94 | 1254 | 97%    | 86.77<br>065 | Cln7            |
| 18145                       | 5209  | 1470 | 96.66% | 79.249<br>89 | 1256 | 94.87% | 67.78<br>871 | Npc1            |
| 12631                       | 1196  | 1465 | 49%    | 343.98<br>71 | 1757 | 53.09% | 413.0<br>12  | Cfl1            |
| gi 40254106 ref NM_134037.2 | 4316  | 1459 | 97.34% | 94.931<br>33 | 1615 | 98.26% | 105.1<br>994 | -               |
| 12193                       | 3537  | 1453 | 95.45% | 115.36<br>29 | 1039 | 95.14% | 82.58<br>527 | Zfp36l2         |
| 22134                       | 5025  | 1452 | 85.81% | 81.145<br>84 | 1298 | 83.92% | 72.62<br>075 | Tgoln1          |
| 20742                       | 9049  | 1451 | 76.33% | 45.030<br>06 | 1386 | 70.95% | 43.06<br>106 | Spnb2           |
| 14688                       | 3143  | 1449 | 96.82% | 129.46<br>72 | 1590 | 97.20% | 142.2<br>246 | Gnb1            |
| 70579                       | 4395  | 1446 | 96.72% | 92.394<br>29 | 1522 | 94.95% | 97.35<br>94  | Zc3h11a         |
| 210998                      | 5621  | 1444 | 95.80% | 72.142<br>19 | 1130 | 95.45% | 56.51<br>802 | D15Ert<br>d621e |
| 12493                       | 1226  | 1444 | 97.72% | 330.75<br>96 | 1360 | 98.69% | 311.8<br>678 | Cd37            |
| 16658                       | 3389  | 1438 | 96.75% | 119.15<br>8  | 2454 | 96.72% | 203.5<br>753 | Ma1b            |

|                             |       |      |        |              |      |        |              |               |
|-----------------------------|-------|------|--------|--------------|------|--------|--------------|---------------|
| 18034                       | 3205  | 1437 | 98.25% | 125.91<br>12 | 1546 | 97.94% | 135.6<br>137 | Nfkb2         |
| 69116                       | 15901 | 1437 | 85.04% | 25.378<br>62 | 926  | 58.93% | 16.37<br>226 | Ubr4          |
| 68652                       | 4278  | 1434 | 92.36% | 94.133<br>47 | 1093 | 91.14% | 71.82<br>928 | Tab2          |
| 22631                       | 3801  | 1430 | 50.64% | 105.65<br>11 | 1506 | 50.57% | 111.3<br>908 | Ywhaz         |
| 20402                       | 9100  | 1421 | 95.31% | 43.851<br>9  | 915  | 88.07% | 28.26<br>844 | Zfp106        |
| 18081                       | 1132  | 1421 | 99.47% | 352.51<br>97 | 1728 | 99.82% | 429.1<br>602 | Ninj1         |
| 13132                       | 4520  | 1417 | 97.85% | 88.037<br>38 | 1354 | 98.27% | 84.21<br>75  | Dab2          |
| 17886                       | 7371  | 1417 | 96.59% | 53.985<br>75 | 1064 | 91.26% | 40.58<br>236 | Myh9          |
| 75767                       | 7965  | 1416 | 99.17% | 49.924<br>44 | 1372 | 96.74% | 48.42<br>732 | Rab11fip<br>1 |
| 19246                       | 4213  | 1416 | 98.62% | 94.385<br>98 | 1302 | 98.46% | 86.88<br>437 | Ptpn1         |
| 14133                       | 1317  | 1412 | 98.79% | 301.08<br>19 | 2709 | 99.09% | 578.2<br>896 | Fcna          |
| gi 31581563 ref NM_178682.3 | 5011  | 1409 | 97.15% | 78.962<br>76 | 1245 | 97.05% | 69.85<br>011 | -             |
| 20168                       | 5030  | 1398 | 69.17% | 78.050<br>36 | 989  | 64.61% | 55.27<br>776 | Rtn3          |
| 21353                       | 2227  | 1397 | 92.95% | 176.16<br>19 | 1071 | 90.93% | 135.2<br>046 | Tank          |
| 12387                       | 3640  | 1396 | 96.29% | 107.70<br>1  | 1199 | 95.80% | 92.60<br>617 | Ctnnb1        |
| 11804                       | 3658  | 1396 | 99.59% | 107.17<br>1  | 1372 | 98.77% | 105.4<br>466 | Aplp2         |
| 70719                       | 3928  | 1395 | 98.63% | 99.732<br>9  | 875  | 97.96% | 62.62<br>658 | Hmha1         |
| 20740                       | 8042  | 1385 | 94.19% | 48.363<br>91 | 1225 | 90.01% | 42.82<br>468 | Spna2         |
| 67448                       | 3205  | 1384 | 98.16% | 121.26<br>73 | 2135 | 98.53% | 187.2<br>802 | Plxdc2        |
| 22627                       | 2078  | 1384 | 95.14% | 187.03<br>65 | 1511 | 96.44% | 204.4<br>283 | Ywhae         |
| 16452                       | 5030  | 1384 | 95.41% | 77.268<br>74 | 1310 | 91.67% | 73.21<br>928 | Jak2          |
| 18643                       | 883   | 1377 | 92.87% | 437.93<br>43 | 1372 | 89.92% | 436.8<br>331 | Pfn1          |

|                              |      |      |        |              |      |        |              |                   |
|------------------------------|------|------|--------|--------------|------|--------|--------------|-------------------|
| 11717                        | 4098 | 1373 | 95.58% | 94.088<br>01 | 1304 | 95.41% | 89.45<br>977 | Ampd3             |
| 170791                       | 2812 | 1371 | 97.69% | 136.91<br>71 | 1330 | 96.44% | 132.9<br>715 | Rbm39             |
| 11946                        | 2443 | 1370 | 89.93% | 157.48<br>27 | 1247 | 90.09% | 143.5<br>044 | Atp5a1            |
| 231549                       | 3944 | 1370 | 92.24% | 97.548<br>22 | 1017 | 92.17% | 72.49<br>468 | Lrrc8d            |
| 17064                        | 6638 | 1368 | 97.92% | 57.874<br>14 | 1793 | 96.19% | 75.93<br>905 | Cd93              |
| 17357                        | 1611 | 1366 | 89.08% | 238.11<br>73 | 2324 | 90.01% | 405.5<br>671 | Marcks11          |
| 20515                        | 3316 | 1364 | 94.03% | 115.51<br>42 | 1461 | 94.03% | 123.8<br>676 | Slc20a1           |
| gi 145275166 ref NM_008160.5 | 847  | 1362 | 97.99% | 451.57<br>45 | 1627 | 97.99% | 540.0<br>404 | -                 |
| 11747                        | 1738 | 1362 | 86.48% | 220.07<br>11 | 1232 | 85.79% | 199.2<br>889 | Anxa5             |
| 11848                        | 2126 | 1362 | 81.33% | 179.90<br>76 | 1498 | 80.15% | 198.0<br>937 | Rhoa              |
| 67945                        | 459  | 1354 | 83.88% | 828.40<br>3  | 1600 | 81.26% | 980.0<br>075 | Rpl41             |
| 66940                        | 1792 | 1352 | 99%    | 211.87<br>24 | 1238 | 98.83% | 194.2<br>248 | Shisa5            |
| 67039                        | 4244 | 1351 | 95.88% | 89.395<br>51 | 1605 | 96.25% | 106.3<br>217 | Rbm25             |
| 52398                        | 5123 | 1345 | 96.10% | 73.728<br>2  | 1096 | 95.86% | 60.14<br>622 | 11-Sep            |
| 11308                        | 3504 | 1341 | 91.24% | 107.47<br>33 | 1504 | 90.84% | 120.6<br>718 | Abi1              |
| 64292                        | 3647 | 1340 | 98.03% | 103.18<br>22 | 2335 | 98.33% | 180.0<br>003 | Ptges             |
| 22187                        | 1165 | 1336 | 39.66% | 322.04<br>48 | 1544 | 40.52% | 372.6<br>005 | Ubb               |
| 547150                       | 4659 | 1334 | 80.83% | 80.407<br>92 | 978  | 78.39% | 59.01<br>58  | 6820431<br>F20Rik |
| 69207                        | 3103 | 1334 | 92.49% | 120.72<br>85 | 1664 | 95.71% | 150.7<br>626 | Srsf11            |
| 384783                       | 4015 | 1333 | 98.93% | 93.235<br>29 | 852  | 98.73% | 59.65<br>903 | Irs2              |
| 78889                        | 2490 | 1331 | 97.99% | 150.11<br>17 | 1603 | 98.67% | 180.9<br>907 | Wsb1              |
| 17113                        | 2258 | 1324 | 97.39% | 164.66<br>44 | 1073 | 97.30% | 133.5<br>974 | M6pr              |

|        |      |      |        |              |      |        |              |         |
|--------|------|------|--------|--------------|------|--------|--------------|---------|
| 22234  | 3719 | 1318 | 96.56% | 99.523<br>34 | 1317 | 96.85% | 99.55<br>927 | Ugcg    |
| 18793  | 1396 | 1316 | 99.79% | 264.73<br>18 | 2351 | 99.79% | 473.4<br>666 | Plaur   |
| 21813  | 4803 | 1315 | 98.79% | 76.886<br>28 | 915  | 92.98% | 53.55<br>877 | Tgfbr2  |
| 17119  | 4662 | 1315 | 97.04% | 79.211<br>67 | 1018 | 97%    | 61.39        | Mxd1    |
| 66713  | 3688 | 1314 | 94.28% | 100.05<br>53 | 1199 | 95.15% | 91.40<br>088 | Actr2   |
| 14190  | 3769 | 1311 | 97.11% | 97.681<br>49 | 930  | 95.94% | 69.37<br>116 | Fgl2    |
| 105855 | 4717 | 1310 | 99.55% | 77.990<br>4  | 1085 | 98.03% | 64.66<br>749 | Nckap11 |
| 81910  | 5193 | 1310 | 86.92% | 70.841<br>65 | 1462 | 87.62% | 79.15<br>005 | Rrbp1   |
| 74178  | 3877 | 1307 | 92.80% | 94.670<br>68 | 1512 | 90.35% | 109.6<br>423 | Stk40   |
| 208643 | 5481 | 1303 | 95.46% | 66.760<br>61 | 971  | 94.27% | 49.80<br>599 | Eif4g1  |
| 21808  | 4725 | 1299 | 97.10% | 77.204<br>58 | 1694 | 98.58% | 100.7<br>938 | Tgfb2   |
| 22668  | 4361 | 1296 | 93.33% | 83.455<br>43 | 1362 | 94.84% | 87.80<br>376 | Sf1     |
| 18263  | 2547 | 1296 | 65.14% | 142.89<br>33 | 984  | 63.37% | 108.6<br>146 | Odc1    |
| 19664  | 5541 | 1296 | 96.12% | 65.682<br>94 | 1189 | 94.37% | 60.32<br>757 | Rbpj    |
| 16854  | 1406 | 1292 | 89.76% | 258.05<br>54 | 1237 | 88.98% | 247.3<br>469 | Lgals3  |
| 80859  | 3855 | 1291 | 95.18% | 94.045<br>4  | 2686 | 98.39% | 195.8<br>862 | Nfkbiz  |
| 20932  | 2863 | 1288 | 93.47% | 126.33<br>69 | 1226 | 93.54% | 120.3<br>902 | Surf4   |
| 17347  | 3070 | 1288 | 98.40% | 117.81<br>84 | 1106 | 99.58% | 101.2<br>835 | Mknk2   |
| 106585 | 8991 | 1287 | 85.16% | 40.198<br>17 | 1229 | 78.50% | 38.42<br>961 | Ankrd12 |
| 215418 | 2890 | 1283 | 99%    | 124.67<br>07 | 1862 | 99.13% | 181.1<br>357 | Csrnp1  |
| 76846  | 703  | 1281 | 69.70% | 511.71<br>66 | 1419 | 69.70% | 567.4<br>782 | Rps9    |
| 14579  | 2257 | 1281 | 98.09% | 159.38<br>71 | 1156 | 99.16% | 143.9<br>953 | Gem     |

|                              |      |      |        |              |      |        |              |         |
|------------------------------|------|------|--------|--------------|------|--------|--------------|---------|
| 98267                        | 3298 | 1278 | 98%    | 108.82<br>18 | 897  | 96.85% | 76.46<br>521 | Stk17b  |
| 22201                        | 3949 | 1276 | 91.42% | 90.740<br>1  | 1204 | 91.72% | 85.71<br>592 | Uba1    |
| 14544                        | 5417 | 1274 | 96.44% | 66.045<br>97 | 1567 | 96.36% | 81.32<br>654 | Gda     |
| 55949                        | 1933 | 1273 | 53.03% | 184.94<br>06 | 1258 | 53.34% | 182.9<br>662 | Eef1b2  |
| 26921                        | 5620 | 1271 | 94.40% | 63.510<br>41 | 827  | 92.86% | 41.37<br>055 | Map4k4  |
| 12215                        | 1752 | 1267 | 82.08% | 203.08<br>52 | 1598 | 77%    | 256.4<br>276 | Bsg     |
| 19353                        | 2284 | 1266 | 98.34% | 155.65<br>87 | 1246 | 96.50% | 153.3<br>713 | Rac1    |
| 12847                        | 4629 | 1265 | 92.57% | 76.743<br>05 | 1090 | 92.98% | 66.20<br>053 | Copa    |
| 19354                        | 3036 | 1264 | 96.61% | 116.91<br>79 | 1101 | 96.05% | 101.9<br>548 | Rac2    |
| gi 168693640 ref NM_194342.2 | 3711 | 1262 | 96.44% | 95.500<br>16 | 1044 | 94.48% | 79.09<br>184 | -       |
| 18521                        | 2868 | 1262 | 46.69% | 123.57<br>08 | 1157 | 45.50% | 113.4<br>165 | Pcbp2   |
| 110006                       | 2456 | 1261 | 98.90% | 144.18<br>58 | 1220 | 99.27% | 139.6<br>541 | Gusb    |
| 20229                        | 1233 | 1257 | 69.51% | 286.29<br>11 | 1392 | 68.78% | 317.3<br>937 | Sat1    |
| 16172                        | 3970 | 1253 | 97.96% | 88.633<br>17 | 1828 | 98.34% | 129.4<br>517 | Il17ra  |
| 18738                        | 3724 | 1249 | 96.19% | 94.186<br>46 | 1481 | 98.47% | 111.8<br>066 | Pitpna  |
| 13244                        | 2005 | 1247 | 91.17% | 174.65<br>77 | 1275 | 91.77% | 178.7<br>796 | Degs1   |
| 51810                        | 3670 | 1245 | 97.87% | 95.266<br>23 | 1255 | 98.28% | 96.13<br>904 | Hnmpu   |
| 22628                        | 3592 | 1243 | 97.41% | 97.178<br>57 | 1035 | 96.10% | 81.00<br>767 | Ywhag   |
| gi 158508666 ref NM_078478.4 | 2476 | 1241 | 99.47% | 140.75<br>27 | 1068 | 99.47% | 121.2<br>67  | -       |
| 54411                        | 2189 | 1236 | 96.35% | 158.56<br>54 | 1239 | 97.08% | 159.1<br>284 | Atp6ap1 |
| 16365                        | 2588 | 1233 | 99.19% | 133.79<br>33 | 2623 | 99.34% | 284.9<br>418 | Irg1    |
| 12767                        | 1821 | 1232 | 96.60% | 189.99<br>25 | 880  | 97.91% | 135.8<br>61  | Cxcr4   |

|                                 |       |      |        |              |      |        |              |              |
|---------------------------------|-------|------|--------|--------------|------|--------|--------------|--------------|
| 12091                           | 2360  | 1231 | 98.73% | 146.48<br>12 | 1409 | 98.69% | 167.8<br>499 | Glb1         |
| 192159                          | 7500  | 1226 | 95.81% | 45.905<br>52 | 883  | 85.57% | 33.09<br>951 | Prpf8        |
| 19244                           | 3413  | 1226 | 93.73% | 100.87<br>65 | 1161 | 92.47% | 95.63<br>526 | Ptp4a2       |
| 11796                           | 2820  | 1226 | 96.63% | 122.08<br>92 | 1287 | 92.59% | 128.3<br>074 | Birc3        |
| 16801                           | 3450  | 1225 | 97.10% | 99.713<br>21 | 1205 | 96.81% | 98.19<br>516 | Arhgef1      |
| 66105                           | 2619  | 1222 | 85.49% | 131.03<br>02 | 1361 | 80.83% | 146.0<br>982 | Ube2d3       |
| 78618                           | 6493  | 1221 | 96.80% | 52.808<br>76 | 832  | 89.11% | 36.02<br>467 | Acap2        |
| 240263                          | 2866  | 1218 | 94.84% | 119.34<br>57 | 1028 | 95.25% | 100.8<br>414 | Fem1c        |
| 15251                           | 4775  | 1218 | 93.36% | 71.632<br>42 | 892  | 90.51% | 52.51<br>866 | Hif1a        |
| 12273                           | 2540  | 1218 | 91.93% | 134.66<br>33 | 2129 | 93.74% | 235.6<br>482 | C5ar1        |
| 218454                          | 4348  | 1217 | 95.56% | 78.602<br>57 | 572  | 93.93% | 36.98<br>525 | Lhfp12       |
| 18792                           | 2343  | 1217 | 98.63% | 145.86<br>6  | 1281 | 98.80% | 153.7<br>089 | Plau         |
| gi 31560810 ref N<br>M_010299.2 | 2024  | 1215 | 98.57% | 168.57<br>82 | 1142 | 97.43% | 158.6<br>272 | -            |
| 22284                           | 11903 | 1214 | 91.83% | 28.641<br>65 | 881  | 76.89% | 20.80<br>854 | Usp9x        |
| 79555                           | 2551  | 1212 | 97.45% | 133.42<br>21 | 897  | 98.28% | 98.85<br>624 | BC0055<br>37 |
| 19325                           | 3531  | 1210 | 96.77% | 96.232<br>85 | 1052 | 97.42% | 83.76<br>067 | Rab10        |
| 12628                           | 4365  | 1210 | 62.82% | 77.846<br>1  | 1486 | 63.12% | 95.70<br>986 | Cfh          |
| 407823                          | 7980  | 1208 | 97.28% | 42.510<br>85 | 1064 | 94.15% | 37.48<br>529 | Baz2b        |
| 67501                           | 6981  | 1202 | 96%    | 48.352<br>9  | 980  | 94.99% | 39.46<br>668 | Ccdc50       |
| 26433                           | 3278  | 1195 | 80.99% | 102.37<br>52 | 1408 | 77.88% | 120.7<br>58  | Plod3        |
| 16403                           | 4205  | 1190 | 97.93% | 79.472<br>46 | 1174 | 98.05% | 78.49<br>179 | Itga6        |
| 18227                           | 3172  | 1187 | 95.87% | 105.08<br>8  | 995  | 95.05% | 88.18<br>851 | Nr4a2        |

|        |      |      |        |              |      |        |              |         |
|--------|------|------|--------|--------------|------|--------|--------------|---------|
| 15384  | 2545 | 1184 | 98.35% | 130.64<br>71 | 1391 | 98.70% | 153.6<br>602 | Hnrnpab |
| 21815  | 1720 | 1182 | 90.99% | 192.98<br>55 | 1693 | 94.48% | 276.7<br>264 | Tgif1   |
| 70790  | 9790 | 1182 | 86.95% | 33.905<br>53 | 976  | 75.02% | 28.02<br>782 | Ubr5    |
| 64209  | 1871 | 1181 | 99.09% | 177.26<br>04 | 1391 | 99.95% | 209.0<br>14  | Herpud1 |
| 12785  | 2178 | 1179 | 86.32% | 152.01<br>68 | 1217 | 92.70% | 157.0<br>923 | Cnbp    |
| 18023  | 4654 | 1179 | 98.41% | 71.141<br>52 | 816  | 98.52% | 49.29<br>307 | Nfe211  |
| 276770 | 1455 | 1178 | 90.79% | 227.36<br>21 | 1245 | 90.45% | 240.5<br>628 | Eif5a   |
| 108829 | 8382 | 1177 | 94.49% | 39.433<br>43 | 919  | 90.61% | 30.82<br>407 | Jmjd1c  |
| 12345  | 1647 | 1176 | 98.85% | 200.51<br>62 | 1166 | 94.90% | 199.0<br>339 | Capzb   |
| 52440  | 3307 | 1173 | 96.46% | 99.609<br>22 | 1010 | 98.73% | 85.86<br>364 | Tax1bp1 |
| 232975 | 4043 | 1171 | 86.20% | 81.337<br>13 | 1320 | 86.62% | 91.78<br>935 | Atp1a3  |
| 11502  | 4003 | 1169 | 94.53% | 82.009<br>59 | 934  | 94.48% | 65.59<br>691 | Adam9   |
| 353172 | 2390 | 1168 | 98.66% | 137.24       | 1151 | 97.07% | 135.3<br>94  | Gars    |
| 80913  | 6311 | 1168 | 95.36% | 51.973<br>31 | 966  | 93.54% | 43.03<br>294 | Pum2    |
| 18717  | 4287 | 1163 | 97.78% | 76.183<br>68 | 1056 | 96.66% | 69.25<br>204 | Pip5k1c |
| 192657 | 3660 | 1163 | 95.03% | 89.234<br>82 | 1495 | 95.16% | 114.8<br>371 | Eil2    |
| 27416  | 5826 | 1157 | 96.69% | 55.769<br>74 | 936  | 93.63% | 45.16<br>765 | Abcc5   |
| 68801  | 2802 | 1156 | 96.61% | 115.85<br>78 | 1458 | 97.04% | 146.2<br>889 | Elov15  |
| 19647  | 6199 | 1156 | 97.27% | 52.368<br>71 | 1270 | 96.14% | 57.59<br>758 | Rbbp6   |
| 67166  | 2928 | 1154 | 95.59% | 110.68<br>03 | 1152 | 95.83% | 110.6<br>123 | Ari8b   |
| 15275  | 4157 | 1153 | 90.45% | 77.890<br>59 | 1378 | 92.42% | 93.19<br>472 | Hk1     |
| 19989  | 937  | 1151 | 52.40% | 344.96<br>21 | 1173 | 52.40% | 351.9<br>497 | Rpl7    |



|                                 |      |      |        |              |      |        |              |              |
|---------------------------------|------|------|--------|--------------|------|--------|--------------|--------------|
| 73389                           | 3045 | 1145 | 73.40% | 105.59<br>76 | 981  | 67.68% | 90.57<br>406 | Hbp1         |
| 66085                           | 1507 | 1144 | 85.34% | 213.18<br>1  | 1190 | 85.34% | 222.0<br>015 | Eif3f        |
| 20345                           | 2604 | 1143 | 70.31% | 123.26<br>53 | 1420 | 70.62% | 153.3<br>096 | Selplg       |
| 226982                          | 7797 | 1142 | 70.78% | 41.131<br>47 | 1203 | 69.17% | 43.37<br>707 | Eif5b        |
| 67996                           | 3547 | 1139 | 98.67% | 90.177<br>51 | 1090 | 98.36% | 86.39<br>476 | Srsf6        |
| 13014                           | 620  | 1138 | 95.97% | 515.44<br>97 | 1339 | 89.52% | 607.1<br>71  | Cstb         |
| 12751                           | 3494 | 1134 | 98.60% | 91.143<br>53 | 1063 | 99.63% | 85.53<br>276 | Tpp1         |
| 108767                          | 1940 | 1133 | 83.92% | 164.00<br>76 | 1654 | 86.39% | 239.6<br>933 | Pnrc1        |
| 170768                          | 5206 | 1132 | 92.26% | 61.062<br>98 | 1301 | 91.63% | 70.25<br>791 | Pfkfb3       |
| 18477                           | 1417 | 1131 | 90.83% | 224.14<br>47 | 1062 | 87.37% | 210.7<br>059 | Prdx1        |
| 216440                          | 4049 | 1130 | 86.98% | 78.372<br>98 | 1356 | 91.83% | 94.15<br>297 | Os9          |
| 20491                           | 2808 | 1129 | 90.31% | 112.91       | 1033 | 90.42% | 103.4<br>25  | Sla          |
| 246198                          | 7271 | 1127 | 93.05% | 43.527<br>68 | 1006 | 88.54% | 38.89<br>788 | Mllt6        |
| 14457                           | 7112 | 1125 | 95.50% | 44.421<br>83 | 1387 | 96.77% | 54.82<br>856 | Gas7         |
| 19697                           | 2709 | 1118 | 95.42% | 115.89<br>6  | 1221 | 97.79% | 126.7<br>152 | Rela         |
| gi 40254289 ref N<br>M_175344.3 | 4950 | 1118 | 98.93% | 63.426<br>73 | 884  | 96.14% | 50.20<br>757 | -            |
| 268396                          | 7432 | 1117 | 94.93% | 42.206<br>87 | 653  | 87.66% | 24.70<br>186 | Sh3pxd2<br>b |
| 13609                           | 3029 | 1117 | 97.09% | 103.55<br>94 | 881  | 95.25% | 81.77<br>09  | S1pr1        |
| 16210                           | 3432 | 1116 | 99.16% | 91.317<br>21 | 896  | 96.85% | 73.39<br>777 | Impact       |
| 71602                           | 4944 | 1114 | 96.38% | 63.276<br>5  | 886  | 91.40% | 50.38<br>223 | Myo1e        |
| 18984                           | 2457 | 1114 | 98.82% | 127.32<br>56 | 1410 | 99.43% | 161.3<br>378 | Por          |
| 20482                           | 6717 | 1113 | 95.97% | 46.532<br>41 | 1356 | 96.75% | 56.75<br>53  | Skil         |

|        |      |      |        |              |      |        |              |                   |
|--------|------|------|--------|--------------|------|--------|--------------|-------------------|
| 16985  | 1828 | 1113 | 73.91% | 170.98<br>37 | 1093 | 76.64% | 168.0<br>994 | Lsp1              |
| 67844  | 2054 | 1112 | 97.47% | 152.03<br>38 | 1076 | 96.93% | 147.2<br>767 | Rab32             |
| 108101 | 2587 | 1111 | 94.63% | 120.60<br>17 | 1366 | 96.17% | 148.4<br>487 | Fermt3            |
| 17118  | 4186 | 1111 | 81.10% | 74.533<br>33 | 1433 | 86.34% | 96.24<br>298 | Marcks            |
| 54170  | 2621 | 1111 | 94.93% | 119.03<br>72 | 1076 | 93.48% | 115.4<br>164 | Rragc             |
| 13057  | 764  | 1107 | 96.86% | 406.90<br>21 | 1267 | 98.30% | 466.2<br>355 | Cyba              |
| 16186  | 1612 | 1107 | 98.82% | 192.84<br>94 | 944  | 99.57% | 164.6<br>376 | Il2rg             |
| 20393  | 3121 | 1102 | 72.70% | 99.157<br>04 | 1023 | 71.39% | 92.15<br>183 | Sgk1              |
| 56212  | 1264 | 1102 | 99.68% | 244.83<br>32 | 1189 | 99.60% | 264.4<br>581 | Rhog              |
| 13642  | 4319 | 1101 | 97.08% | 71.587<br>93 | 1293 | 97.11% | 84.16<br>615 | Efnb2             |
| 59013  | 2242 | 1101 | 94.69% | 137.90<br>74 | 1186 | 96.48% | 148.7<br>206 | Hnrnp1            |
| 319446 | 1766 | 1100 | 85.67% | 174.91<br>93 | 1167 | 85.45% | 185.7<br>814 | Dpep2             |
| 12977  | 4192 | 1100 | 93.44% | 73.689<br>76 | 735  | 94.87% | 49.29<br>333 | Csf1              |
| 13200  | 2134 | 1096 | 93.21% | 144.22<br>88 | 1346 | 91.19% | 177.3<br>261 | Ddost             |
| 67246  | 6094 | 1096 | 95.82% | 50.506<br>1  | 853  | 88.61% | 39.35<br>217 | 2810474<br>O19Rik |
| 216805 | 2864 | 1096 | 99.16% | 107.46<br>65 | 929  | 97.94% | 91.19<br>37  | Flcn              |
| 213391 | 6370 | 1096 | 98.60% | 48.317<br>76 | 796  | 95.89% | 35.13<br>142 | Rassf4            |
| 18571  | 5976 | 1094 | 90.34% | 51.409<br>39 | 984  | 88.30% | 46.29<br>207 | Pdcd6ip           |
| 12527  | 1306 | 1093 | 90.28% | 235.02<br>43 | 1652 | 90.20% | 355.6<br>223 | Cd9               |
| 12321  | 3216 | 1092 | 97.51% | 95.354<br>74 | 919  | 94.78% | 80.33<br>811 | Calu              |
| 68585  | 6165 | 1092 | 69.39% | 49.742<br>23 | 1011 | 57.40% | 46.10<br>417 | Rtn4              |
| 16195  | 5452 | 1091 | 97.23% | 56.195<br>9  | 695  | 95.01% | 35.83<br>86  | Il6st             |

|        |      |      |        |              |      |        |              |             |
|--------|------|------|--------|--------------|------|--------|--------------|-------------|
| 23983  | 1711 | 1091 | 95.21% | 179.06<br>49 | 1180 | 91.58% | 193.8<br>894 | Pcbp1       |
| 14661  | 3158 | 1090 | 90.06% | 96.928<br>19 | 1031 | 92.65% | 91.78<br>435 | Glud1       |
| 56706  | 2161 | 1090 | 93.75% | 141.64<br>7  | 1262 | 93.85% | 164.1<br>824 | Ccn1l       |
| 13664  | 2879 | 1088 | 95.76% | 106.12<br>63 | 1193 | 96.46% | 116.4<br>987 | Eif1a       |
| 71929  | 2881 | 1088 | 96.01% | 106.05<br>26 | 738  | 96.81% | 72.01<br>703 | Tmem12<br>3 |
| 232087 | 2804 | 1086 | 93.97% | 108.76<br>46 | 1340 | 93.76% | 134.3<br>535 | Mat2a       |
| 66870  | 6685 | 1085 | 68.21% | 45.578<br>92 | 1160 | 63.49% | 48.78<br>414 | Serbp1      |
| 26397  | 2166 | 1083 | 99.45% | 140.41<br>25 | 1781 | 99.45% | 231.1<br>679 | Map2k3      |
| 12494  | 2995 | 1077 | 93.19% | 100.98<br>45 | 1405 | 96.29% | 131.8<br>869 | Cd38        |
| 218236 | 4919 | 1076 | 97.03% | 61.428<br>68 | 843  | 90.04% | 48.18<br>067 | Fam120a     |
| 18602  | 2640 | 1073 | 68.11% | 114.13<br>83 | 1124 | 69.24% | 119.6<br>973 | Padi4       |
| 14660  | 4974 | 1072 | 92.38% | 60.523<br>59 | 1065 | 90.43% | 60.19<br>577 | Gls         |
| 19951  | 504  | 1068 | 96.03% | 595.08<br>15 | 1171 | 95.63% | 653.2<br>035 | Rpl32       |
| 56442  | 2889 | 1063 | 96.23% | 103.32<br>88 | 929  | 95.08% | 90.40<br>455 | Serinc1     |
| 108857 | 8251 | 1059 | 91.88% | 36.043<br>34 | 838  | 86.87% | 28.55<br>351 | Ankhd1      |
| 14489  | 4042 | 1059 | 94.78% | 73.575<br>86 | 761  | 95.03% | 52.93<br>104 | Mtpn        |
| 12332  | 1221 | 1059 | 99.92% | 243.56<br>56 | 1243 | 99.43% | 286.2<br>052 | Capg        |
| 11491  | 4410 | 1058 | 94.42% | 67.372<br>52 | 815  | 93.99% | 51.95<br>665 | Adam17      |
| 54473  | 3705 | 1058 | 99.41% | 80.192<br>39 | 1027 | 98.65% | 77.92<br>994 | Tollip      |
| 226641 | 7463 | 1055 | 94.12% | 39.698<br>56 | 795  | 92.95% | 29.94<br>855 | Atf6        |
| 18413  | 1907 | 1054 | 98.06% | 155.21<br>21 | 1676 | 97.95% | 247.0<br>845 | Osm         |
| 27226  | 1923 | 1052 | 97.14% | 153.62<br>86 | 1611 | 96.88% | 235.5<br>257 | Pla2g7      |

|                             |       |      |        |              |      |        |              |         |
|-----------------------------|-------|------|--------|--------------|------|--------|--------------|---------|
| 19386                       | 9477  | 1052 | 90.56% | 31.173<br>14 | 787  | 80.03% | 23.34<br>673 | Ranbp2  |
| 54401                       | 2775  | 1051 | 98.49% | 106.35<br>93 | 1150 | 98.31% | 116.5<br>083 | Ywhab   |
| 107358                      | 6144  | 1049 | 81.54% | 47.946<br>84 | 921  | 89.24% | 42.14<br>349 | Tm9sf3  |
| 27362                       | 1865  | 1049 | 92.06% | 157.95<br>46 | 1338 | 91.47% | 201.6<br>97  | Dnajb9  |
| 11566                       | 2553  | 1047 | 98.51% | 115.16<br>79 | 1096 | 98.71% | 120.6<br>929 | Adss    |
| 225929                      | 4221  | 1046 | 93.82% | 69.590<br>83 | 1064 | 93.51% | 70.86<br>771 | Pat11   |
| 16364                       | 4683  | 1046 | 98.42% | 62.725<br>37 | 701  | 96.58% | 42.08<br>39  | Irf4    |
| 17775                       | 2130  | 1045 | 74.69% | 137.77<br>56 | 1084 | 71.31% | 143.0<br>776 | Laptm4a |
| 108664                      | 1976  | 1044 | 95.85% | 148.37<br>11 | 882  | 97.12% | 125.4<br>885 | Atp6v1h |
| 20430                       | 6524  | 1043 | 75.77% | 44.895<br>84 | 855  | 76.33% | 36.84<br>464 | Cyfp1   |
| gi 84794646 ref NM_026148.2 | 4244  | 1042 | 95.90% | 68.949<br>01 | 904  | 95.10% | 59.88<br>46  | -       |
| 67154                       | 3680  | 1037 | 97.85% | 79.134<br>64 | 926  | 96.06% | 70.74<br>33  | Mtdh    |
| 12336                       | 1461  | 1035 | 87.54% | 198.94<br>17 | 1239 | 91.10% | 238.4<br>203 | Capns1  |
| 66687                       | 3779  | 1035 | 91.69% | 76.912<br>9  | 822  | 92.35% | 61.15<br>29  | Tbc1d15 |
| 12343                       | 2015  | 1033 | 97.82% | 143.96<br>63 | 1042 | 98.01% | 145.3<br>834 | Capza2  |
| 11307                       | 5821  | 1031 | 96.15% | 49.738<br>97 | 524  | 86.81% | 25.30<br>788 | Abcg1   |
| 217980                      | 4707  | 1031 | 96.15% | 61.510<br>63 | 931  | 93.54% | 55.60<br>676 | Larp4b  |
| 74427                       | 4238  | 1030 | 94.83% | 68.251<br>47 | 865  | 90%    | 57.38<br>221 | Eaf1    |
| 13036                       | 1627  | 1029 | 84.82% | 177.60<br>84 | 1177 | 92.32% | 203.3<br>813 | Ctsh    |
| 14281                       | 2107  | 1029 | 98.01% | 137.14<br>71 | 449  | 97.58% | 59.91<br>064 | Fos     |
| 237782                      | 7394  | 1027 | 97.11% | 39.005<br>58 | 834  | 92.33% | 31.71<br>091 | Smcr8   |
| 81702                       | 10066 | 1027 | 86.54% | 28.651<br>62 | 944  | 81.85% | 26.36<br>557 | Ankrd17 |

|        |       |      |        |              |      |        |              |                   |
|--------|-------|------|--------|--------------|------|--------|--------------|-------------------|
| 13653  | 3072  | 1026 | 98.99% | 93.791<br>15 | 877  | 98.08% | 80.26<br>025 | Egr1              |
| 170942 | 796   | 1020 | 88.69% | 359.85<br>11 | 1391 | 88.82% | 491.2<br>88  | Erdr1             |
| 14815  | 6345  | 1018 | 96.77% | 45.055<br>92 | 954  | 91%    | 42.27<br>064 | Nr3c1             |
| 240832 | 5857  | 1017 | 89.48% | 48.761<br>99 | 864  | 87.25% | 41.47<br>254 | Tor1aip2          |
| 17938  | 7034  | 1015 | 35.97% | 40.522<br>79 | 1073 | 27.52% | 42.88<br>639 | Naca              |
| 18751  | 8830  | 1014 | 94.96% | 32.248<br>76 | 836  | 90.74% | 26.61<br>753 | Prkcb             |
| 52118  | 2902  | 1013 | 97.11% | 98.027<br>46 | 962  | 96.31% | 93.19<br>654 | Pvr               |
| 17979  | 7571  | 1012 | 95.60% | 37.537<br>3  | 650  | 88.61% | 24.13<br>694 | Ncoa3             |
| 12608  | 1507  | 1011 | 82.88% | 188.39<br>68 | 1138 | 82.61% | 212.3<br>006 | Cebpb             |
| 14962  | 2767  | 1011 | 90.21% | 102.60<br>72 | 1382 | 91.80% | 140.4<br>174 | Cfb               |
| 15370  | 2534  | 1008 | 96.17% | 111.70<br>94 | 1077 | 96.72% | 119.4<br>899 | Nr4a1             |
| 74211  | 4934  | 1006 | 85.25% | 57.257<br>79 | 828  | 84.25% | 47.17<br>95  | 1700017<br>B05Rik |
| 54720  | 2324  | 1005 | 90.10% | 121.44<br>11 | 983  | 90.28% | 118.9<br>158 | Rcan1             |
| 12478  | 2440  | 1004 | 97.87% | 115.55<br>26 | 605  | 98.52% | 69.70<br>881 | Cd19              |
| 17160  | 3434  | 1003 | 97.67% | 82.023<br>13 | 1046 | 95.89% | 85.63<br>544 | Man2b2            |
| 56200  | 4763  | 1001 | 96.45% | 59.018<br>64 | 953  | 98.34% | 56.25<br>154 | Ddx21             |
| 19359  | 3827  | 1001 | 82.78% | 73.453<br>3  | 937  | 80.82% | 68.83<br>404 | Rad23b            |
| 20375  | 1333  | 1000 | 96.77% | 210.67<br>14 | 1125 | 97.07% | 237.2<br>709 | Sfpi1             |
| 27041  | 2685  | 998  | 89.76% | 104.38<br>11 | 1103 | 89.39% | 115.4<br>924 | G3bp1             |
| 207165 | 11506 | 997  | 80.90% | 24.333<br>61 | 832  | 77.61% | 20.32<br>924 | Bptf              |
| 57262  | 598   | 996  | 94.31% | 467.72<br>85 | 1089 | 87.79% | 511.9<br>751 | Retnla            |
| 244895 | 10994 | 996  | 91.58% | 25.441<br>3  | 850  | 83.75% | 21.73<br>628 | C230081<br>A13Rik |

|                                  |      |     |        |              |      |        |              |          |
|----------------------------------|------|-----|--------|--------------|------|--------|--------------|----------|
| 66878                            | 3661 | 995 | 92.52% | 76.323<br>64 | 885  | 95.08% | 67.96<br>192 | Riok3    |
| 213109                           | 7561 | 995 | 92.75% | 36.955<br>54 | 773  | 88.18% | 28.74<br>236 | Phf3     |
| 27207                            | 602  | 994 | 73.59% | 463.68<br>77 | 998  | 74.42% | 466.0<br>754 | Rps11    |
| 19248                            | 3190 | 994 | 97.90% | 87.504<br>71 | 856  | 97.77% | 75.44<br>061 | Ptpn12   |
| 66141                            | 648  | 987 | 97.07% | 427.73<br>8  | 1493 | 99.69% | 647.7<br>493 | Ifitm3   |
| 50875                            | 3590 | 985 | 98.44% | 77.050<br>86 | 744  | 98.16% | 58.26<br>404 | Tmod3    |
| 54711                            | 5407 | 979 | 96.69% | 50.846<br>61 | 1024 | 95.47% | 53.24<br>339 | Plagl2   |
| 11490                            | 3006 | 977 | 98.64% | 91.272<br>78 | 1086 | 97.21% | 101.5<br>694 | Adam15   |
| 56445                            | 2839 | 976 | 97.18% | 96.542<br>85 | 1109 | 94.86% | 109.8<br>217 | Dnaja2   |
| 17913                            | 5318 | 973 | 65.29% | 51.380<br>72 | 836  | 66.96% | 44.19<br>57  | Myo1c    |
| gi 15718668 ref N<br>M_015774.2  | 3139 | 973 | 99.55% | 87.047<br>69 | 623  | 95.99% | 55.79<br>803 | -        |
| 73723                            | 721  | 973 | 96.39% | 378.97<br>74 | 1293 | 96.95% | 504.1<br>797 | Sh3bgrl3 |
| 70495                            | 2376 | 973 | 92%    | 115.00<br>11 | 949  | 87.37% | 112.2<br>902 | Atp6ap2  |
| 108124                           | 2332 | 970 | 99.66% | 116.80<br>97 | 1027 | 99.40% | 123.8<br>124 | Napa     |
| gi 260447083 ref N<br>M_023516.4 | 932  | 967 | 95.92% | 291.37<br>1  | 906  | 97.64% | 273.2<br>967 | -        |
| 16476                            | 3187 | 966 | 96.11% | 85.119<br>83 | 680  | 94.29% | 59.98<br>587 | Jun      |
| 225055                           | 4013 | 964 | 93.94% | 67.459<br>57 | 976  | 95.12% | 68.37<br>586 | Fbxo11   |
| 20338                            | 6300 | 963 | 97%    | 42.926<br>1  | 613  | 90.43% | 27.35<br>534 | Sel1l    |
| 68724                            | 1702 | 962 | 95.48% | 158.72<br>72 | 946  | 96.12% | 156.2<br>621 | Arl8a    |
| 68292                            | 4236 | 960 | 96.77% | 63.643<br>05 | 759  | 95.77% | 50.37<br>417 | Stt3b    |
| 13194                            | 4171 | 957 | 98.23% | 64.432<br>87 | 834  | 97.36% | 56.21<br>445 | Ddb1     |
| 19324                            | 2657 | 956 | 98.46% | 101.04<br>2  | 1197 | 96.76% | 126.6<br>557 | Rab1     |

|                              |       |     |        |              |      |        |              |              |
|------------------------------|-------|-----|--------|--------------|------|--------|--------------|--------------|
| 12549                        | 7722  | 954 | 95.23% | 34.693<br>99 | 645  | 86.53% | 23.48<br>292 | Arhgap3<br>1 |
| 16190                        | 5122  | 953 | 93.58% | 52.250<br>33 | 1082 | 94.65% | 59.38<br>952 | Il4ra        |
| 66855                        | 2937  | 952 | 87.47% | 91.026<br>68 | 794  | 88.32% | 76.00<br>439 | Tcf25        |
| gi 142366309 ref NM_027996.2 | 6072  | 951 | 94.43% | 43.982<br>96 | 756  | 86.53% | 35.00<br>355 | -            |
| 19223                        | 1751  | 950 | 97.60% | 152.36<br>08 | 1142 | 96.52% | 183.3<br>589 | Ptgis        |
| 12211                        | 16212 | 949 | 79.04% | 16.438<br>62 | 492  | 49.51% | 8.531<br>996 | Birc6        |
| 107702                       | 1807  | 948 | 95.74% | 147.32<br>82 | 1024 | 95.63% | 159.3<br>177 | Rnh1         |
| 20318                        | 5174  | 947 | 72.48% | 51.399<br>54 | 980  | 66.54% | 53.25<br>026 | Sdf4         |
| 14131                        | 1353  | 947 | 94.68% | 196.55<br>67 | 1466 | 93.72% | 304.6<br>199 | Fcgr3        |
| 21356                        | 2750  | 946 | 95.53% | 96.603<br>79 | 1145 | 95.45% | 117.0<br>563 | Tapbp        |
| 15985                        | 1232  | 945 | 97%    | 215.40<br>55 | 591  | 98.46% | 134.8<br>649 | Cd79b        |
| 11770                        | 646   | 944 | 95.98% | 410.36<br>96 | 1646 | 98.30% | 716.3<br>404 | Fabp4        |
| 27360                        | 4520  | 941 | 91.15% | 58.463<br>78 | 1137 | 91.28% | 70.72<br>031 | Add3         |
| 11886                        | 2251  | 940 | 95.34% | 117.27<br>03 | 1026 | 96.76% | 128.1<br>427 | Asah1        |
| gi 68299754 ref NM_011308.2  | 8740  | 938 | 92.71% | 30.138<br>88 | 754  | 91.72% | 24.25<br>393 | -            |
| 224088                       | 7310  | 937 | 95.31% | 35.996<br>31 | 785  | 87.40% | 30.19<br>078 | Atp13a3      |
| 214597                       | 4221  | 936 | 95.48% | 62.272<br>49 | 726  | 90.76% | 48.35<br>522 | Sidt2        |
| 12051                        | 1835  | 936 | 97.82% | 143.24<br>37 | 1228 | 98.58% | 188.1<br>414 | Bcl3         |
| 66961                        | 3177  | 936 | 97.95% | 82.735<br>97 | 528  | 96.44% | 46.72<br>387 | Neat1        |
| 224826                       | 7696  | 936 | 95.05% | 34.154<br>39 | 605  | 82.37% | 22.10<br>103 | Ubr2         |
| 18018                        | 4896  | 934 | 94.02% | 53.572<br>41 | 573  | 89.46% | 32.90<br>299 | Nfatc1       |
| 54673                        | 3949  | 934 | 83.31% | 66.419<br>48 | 952  | 79.94% | 67.77<br>538 | Sh3glb1      |

|                                  |       |     |        |              |      |        |              |         |
|----------------------------------|-------|-----|--------|--------------|------|--------|--------------|---------|
| 20303                            | 674   | 933 | 94.21% | 388.73<br>84 | 2154 | 96.29% | 898.4<br>79  | Ccl4    |
| 69834                            | 4605  | 931 | 96.22% | 56.774<br>82 | 913  | 94.70% | 55.73<br>952 | Rab43   |
| 140559                           | 2256  | 928 | 96.85% | 115.51<br>67 | 864  | 97.07% | 107.6<br>705 | Igsf8   |
| 12747                            | 3088  | 926 | 80.67% | 84.211<br>11 | 826  | 76.78% | 75.20<br>122 | Clk1    |
| 68564                            | 10399 | 924 | 87.44% | 24.952<br>62 | 860  | 86.74% | 23.25<br>032 | Nufip2  |
| 27049                            | 5158  | 923 | 92.73% | 50.252<br>31 | 837  | 91.41% | 45.62<br>115 | Etv3    |
| 74012                            | 4197  | 919 | 90.42% | 61.491<br>1  | 998  | 92.35% | 66.85<br>189 | Rap2b   |
| 11773                            | 2057  | 918 | 96.45% | 125.32<br>68 | 858  | 95.38% | 117.2<br>668 | Ap2m1   |
| 19128                            | 3270  | 918 | 97.83% | 78.837<br>1  | 993  | 99.14% | 85.37<br>36  | Pros1   |
| 67186                            | 441   | 916 | 55.33% | 583.30<br>08 | 899  | 55.33% | 573.1<br>169 | Rplp2   |
| 12461                            | 1962  | 911 | 98.42% | 130.39<br>32 | 813  | 98.73% | 116.4<br>967 | Cct2    |
| 75646                            | 4929  | 910 | 94.04% | 51.846<br>36 | 608  | 91.11% | 34.67<br>902 | Rai14   |
| 76089                            | 6544  | 910 | 96.90% | 39.051<br>15 | 1081 | 95.60% | 46.44<br>132 | Rapgef2 |
| 14007                            | 9108  | 910 | 75.86% | 28.057<br>83 | 880  | 75.55% | 27.16<br>325 | Celf2   |
| 320024                           | 4394  | 908 | 99.25% | 58.031<br>19 | 595  | 95.97% | 38.06<br>966 | Nceh1   |
| 56550                            | 2483  | 908 | 97.06% | 102.69<br>39 | 958  | 96.34% | 108.4<br>703 | Ube2d2a |
| 14584                            | 2986  | 908 | 98.56% | 85.394<br>86 | 1385 | 98.83% | 130.4<br>014 | Gfpt2   |
| 15976                            | 3051  | 905 | 96.85% | 83.299<br>44 | 1042 | 95.74% | 96.01<br>689 | Ifnar2  |
| 226251                           | 6638  | 904 | 82.63% | 38.244<br>32 | 488  | 73%    | 20.66<br>83  | Ablim1  |
| 14130                            | 1556  | 901 | 94.73% | 162.61<br>14 | 837  | 94.73% | 151.2<br>3   | Fcgr2b  |
| 75965                            | 5173  | 899 | 95.81% | 48.803<br>72 | 1022 | 96.27% | 55.54<br>315 | Zdhhc20 |
| gi 114796649 ref N<br>M_010956.3 | 6614  | 897 | 84.79% | 38.085<br>88 | 782  | 84.26% | 33.24<br>028 | -       |



|                              |      |     |        |              |      |        |              |               |
|------------------------------|------|-----|--------|--------------|------|--------|--------------|---------------|
| 27370                        | 457  | 897 | 59.74% | 551.20<br>35 | 901  | 60.18% | 554.2<br>819 | Rps26         |
| 16478                        | 2878 | 896 | 62.75% | 87.428<br>48 | 868  | 61.15% | 84.79<br>125 | Jund          |
| 15902                        | 1289 | 894 | 96.20% | 194.76<br>92 | 1266 | 93.56% | 276.1<br>232 | Id2           |
| 18128                        | 9497 | 894 | 89.32% | 26.435<br>46 | 1029 | 80.91% | 30.46<br>148 | Notch1        |
| 14595                        | 3976 | 893 | 98.52% | 63.072<br>61 | 806  | 93.01% | 56.99<br>159 | B4galt1       |
| 69171                        | 2738 | 890 | 87.66% | 91.283<br>5  | 761  | 89.19% | 78.13<br>999 | Cnppd1        |
| 328572                       | 8749 | 889 | 92.12% | 28.535<br>08 | 600  | 74.18% | 19.28<br>035 | Ep300         |
| 72007                        | 6875 | 884 | 94.24% | 36.108<br>98 | 605  | 88.96% | 24.74<br>029 | Fndc3b        |
| 19211                        | 8229 | 881 | 88.10% | 30.065<br>23 | 709  | 87.24% | 24.22<br>263 | Pten          |
| 28006                        | 4305 | 881 | 97.28% | 57.469<br>64 | 691  | 94.82% | 45.12<br>602 | D6Wsu1<br>16e |
| 20947                        | 4056 | 881 | 94.95% | 60.997<br>73 | 638  | 93.39% | 44.22<br>266 | Swap70        |
| 105148                       | 4396 | 880 | 95.72% | 56.216<br>1  | 728  | 97.29% | 46.55<br>816 | Iars          |
| 19164                        | 3023 | 880 | 87.30% | 81.748<br>58 | 971  | 84.19% | 90.30<br>321 | Psen1         |
| 69660                        | 2325 | 880 | 91.78% | 106.29<br>07 | 952  | 92.09% | 115.1<br>161 | Tmbim1        |
| 66868                        | 2978 | 878 | 98.29% | 82.795<br>27 | 788  | 98.93% | 74.39<br>156 | Mfsd1         |
| 56403                        | 6559 | 878 | 86.60% | 37.591<br>75 | 663  | 82.07% | 28.41<br>829 | Syncrip       |
| 57296                        | 1529 | 877 | 87.18% | 161.07<br>49 | 786  | 86.46% | 144.5<br>231 | Psmc8         |
| gi 141801897 ref NM_011319.2 | 1866 | 875 | 99.52% | 131.68<br>37 | 738  | 98.50% | 111.1<br>903 | -             |
| 319448                       | 6177 | 874 | 93.65% | 39.734<br>66 | 664  | 87.70% | 30.22<br>126 | Fndc3a        |
| 78832                        | 5808 | 873 | 96.13% | 42.210<br>78 | 789  | 95.54% | 38.19<br>201 | Cacul1        |
| 16573                        | 6030 | 871 | 92.90% | 40.563<br>61 | 730  | 94.05% | 34.03<br>515 | Kif5b         |
| 110593                       | 7323 | 871 | 92.26% | 33.401<br>41 | 885  | 90.86% | 33.97<br>632 | Prdm2         |

|                                  |       |     |        |              |      |        |              |                   |
|----------------------------------|-------|-----|--------|--------------|------|--------|--------------|-------------------|
| 58800                            | 7145  | 869 | 94.12% | 34.154<br>92 | 618  | 84.93% | 24.31<br>691 | Trpm7             |
| 17167                            | 1985  | 869 | 87.05% | 122.94<br>05 | 2407 | 87.51% | 340.9<br>084 | Marco             |
| 72674                            | 2024  | 867 | 99.51% | 120.29<br>41 | 859  | 98.72% | 119.3<br>177 | Adipor1           |
| 27060                            | 3045  | 866 | 83.05% | 79.866<br>8  | 727  | 86.21% | 67.12<br>267 | Tcirg1            |
| 67771                            | 1897  | 866 | 84.24% | 128.19<br>95 | 1009 | 86.82% | 149.5<br>361 | Arpc5             |
| gi 161621258 ref N<br>M_013489.2 | 3190  | 866 | 93.39% | 76.236<br>49 | 789  | 95.83% | 69.53<br>58  | -                 |
| 14682                            | 5634  | 866 | 93.22% | 43.165<br>5  | 972  | 89.79% | 48.50<br>333 | Gnaq              |
| 50794                            | 6396  | 866 | 95.62% | 38.022<br>89 | 691  | 91.31% | 30.37<br>328 | Klf13             |
| 66552                            | 5629  | 865 | 94.71% | 43.153<br>95 | 772  | 90.87% | 38.55<br>744 | 2010106<br>G01Rik |
| 20410                            | 2914  | 863 | 99.69% | 83.168<br>13 | 708  | 95.61% | 68.30<br>71  | Sorbs3            |
| 217344                           | 3927  | 861 | 89.56% | 61.571<br>25 | 1048 | 90.09% | 75.02<br>785 | Rhbdf2            |
| 15204                            | 15363 | 859 | 69.76% | 15.701<br>92 | 604  | 51.96% | 11.05<br>307 | Herc2             |
| 544752                           | 4726  | 858 | 97.19% | 50.983<br>46 | 655  | 96.21% | 38.96<br>455 | Tug1              |
| 23806                            | 6435  | 856 | 82.42% | 37.356<br>05 | 742  | 77.61% | 32.41<br>735 | Arih1             |
| 17750                            | 556   | 854 | 81.47% | 431.33<br>91 | 1122 | 68.88% | 567.3<br>358 | Mt2               |
| 214162                           | 16439 | 853 | 72.43% | 14.571<br>67 | 525  | 50.87% | 8.978<br>546 | Mill              |
| 17768                            | 2070  | 853 | 97.54% | 115.72<br>16 | 764  | 97%    | 103.7<br>636 | Mthfd2            |
| 69635                            | 5903  | 852 | 96.66% | 40.532<br>42 | 678  | 94.87% | 32.29<br>082 | Dapk1             |
| 16796                            | 3433  | 852 | 98.69% | 69.694<br>98 | 765  | 97.61% | 62.64<br>837 | Lasp1             |
| 68421                            | 5422  | 852 | 90.32% | 44.128<br>16 | 733  | 86.46% | 38.00<br>726 | Lmbrd1            |
| 110355                           | 3332  | 851 | 93.13% | 71.723<br>3  | 725  | 92.71% | 61.17<br>235 | Adrbk1            |
| 56700                            | 1557  | 851 | 96.47% | 153.48<br>88 | 984  | 95.70% | 177.6<br>759 | 0610031<br>J06Rik |

|                                     |      |     |        |              |      |        |              |                   |
|-------------------------------------|------|-----|--------|--------------|------|--------|--------------|-------------------|
| 12482                               | 2057 | 850 | 99.81% | 116.04<br>34 | 497  | 98.69% | 67.92<br>728 | Ms4a1             |
| 19345                               | 1587 | 850 | 98.55% | 150.41<br>03 | 838  | 98.55% | 148.4<br>531 | Rab5c             |
| 545030                              | 9683 | 849 | 90.31% | 24.622<br>57 | 529  | 72.27% | 15.35<br>917 | Wdfy4             |
| 13732                               | 787  | 849 | 95.17% | 302.94<br>84 | 976  | 78.53% | 348.6<br>56  | Emp3              |
| 74048                               | 4846 | 849 | 95.42% | 49.199<br>42 | 797  | 95.46% | 46.23<br>779 | 4632428<br>N05Rik |
| 20874                               | 7047 | 846 | 93.70% | 33.713<br>34 | 782  | 91.06% | 31.19<br>785 | Slk               |
| 17925                               | 7296 | 844 | 92.48% | 32.485<br>78 | 604  | 82.79% | 23.27<br>417 | Myo9b             |
| 15273                               | 9788 | 843 | 92.72% | 24.186<br>29 | 855  | 91.87% | 24.55<br>807 | Hivep2            |
| 387609                              | 4392 | 843 | 95.95% | 53.901<br>51 | 732  | 94.54% | 46.85<br>661 | Zhx2              |
| 18036                               | 1945 | 843 | 84.99% | 121.71<br>49 | 1225 | 91.52% | 177.0<br>674 | Nfkbib            |
| 68184                               | 2236 | 842 | 96.33% | 105.74<br>89 | 1023 | 93.02% | 128.6<br>252 | Denr              |
| 72102                               | 6445 | 841 | 95.56% | 36.644<br>5  | 639  | 93.24% | 27.87<br>405 | Dusp11            |
| 65114                               | 3169 | 840 | 97.48% | 74.437<br>67 | 757  | 94.73% | 67.15<br>769 | Vps35             |
| gi 149257398 ref X<br>M_001478863.1 | 5390 | 840 | 48.42% | 43.764<br>93 | 1087 | 49.96% | 56.69<br>737 | -                 |
| 14011                               | 5541 | 839 | 87.35% | 42.521<br>59 | 748  | 89.48% | 37.95<br>208 | Etv6              |
| 319622                              | 6891 | 837 | 92.42% | 34.109<br>78 | 758  | 80.99% | 30.92<br>495 | Itpril2           |
| 13204                               | 3009 | 836 | 96.78% | 78.022<br>49 | 768  | 91.69% | 71.75<br>648 | Dhx15             |
| 16600                               | 3057 | 835 | 90.45% | 76.705<br>54 | 1000 | 92.44% | 91.96<br>587 | Klf4              |
| 19414                               | 4118 | 835 | 99.27% | 56.942<br>41 | 563  | 96.43% | 38.43<br>653 | Rasa3             |
| 14784                               | 2624 | 833 | 92.80% | 89.149<br>08 | 804  | 91.01% | 86.14<br>188 | Grb2              |
| 56637                               | 8298 | 832 | 83.68% | 28.156<br>95 | 573  | 77.46% | 19.41<br>348 | Gsk3b             |
| 19820                               | 7435 | 832 | 94.49% | 31.425<br>2  | 756  | 88.55% | 28.58<br>663 | Rlim              |

|                              |       |     |        |              |      |        |              |                   |
|------------------------------|-------|-----|--------|--------------|------|--------|--------------|-------------------|
| 68077                        | 1572  | 831 | 96.31% | 148.45<br>14 | 802  | 97.65% | 143.4<br>313 | Gltscr2           |
| 18707                        | 5102  | 828 | 91.40% | 45.574<br>89 | 569  | 85.99% | 31.35<br>407 | Pik3cd            |
| 214469                       | 5076  | 827 | 96.49% | 45.753       | 640  | 95.65% | 35.44<br>708 | Fam168b           |
| 170644                       | 6455  | 826 | 92.56% | 35.935<br>15 | 713  | 86.97% | 31.05<br>385 | Ubn1              |
| 17873                        | 1305  | 826 | 96.93% | 177.74<br>82 | 1183 | 99.23% | 254.8<br>569 | Gadd45b           |
| 20088                        | 875   | 825 | 46.40% | 264.77<br>78 | 978  | 39.54% | 314.2<br>338 | Rps24             |
| gi 158518430 ref NM_018886.4 | 2542  | 825 | 99.13% | 91.141<br>07 | 721  | 96.89% | 79.74<br>103 | -                 |
| 12283                        | 3800  | 825 | 93.74% | 60.968<br>58 | 667  | 94.87% | 49.34<br>741 | Cab39             |
| 24109                        | 2667  | 824 | 93.33% | 86.764<br>07 | 810  | 89.80% | 85.38<br>55  | Ubl3              |
| 12873                        | 1458  | 823 | 98.70% | 158.51<br>78 | 82   | 83.13% | 15.81<br>17  | Cpa3              |
| 12125                        | 5040  | 821 | 96.53% | 45.745<br>49 | 1053 | 96.94% | 58.73<br>811 | Bcl2l11           |
| 218203                       | 2983  | 820 | 94.84% | 77.196<br>27 | 721  | 96.58% | 67.95<br>229 | Myliip            |
| 99371                        | 8777  | 820 | 93.59% | 26.236<br>35 | 508  | 78.93% | 16.27<br>195 | Arfgef2           |
| 13367                        | 4378  | 819 | 98.54% | 52.534<br>41 | 732  | 96.03% | 47.00<br>645 | Diap1             |
| 71175                        | 8815  | 819 | 94.63% | 26.091<br>39 | 574  | 88.19% | 18.30<br>677 | Nipbl             |
| 66540                        | 3148  | 819 | 97.59% | 73.060<br>88 | 526  | 96.95% | 46.97<br>569 | Fam107b           |
| gi 118130235 ref NM_011103.2 | 2536  | 817 | 97.95% | 90.470<br>82 | 723  | 98.15% | 80.15<br>141 | -                 |
| 13885                        | 1618  | 816 | 68.91% | 141.62<br>74 | 841  | 60.26% | 146.1<br>301 | Esd               |
| 12757                        | 1199  | 815 | 86.57% | 190.88<br>6  | 923  | 87.07% | 216.4<br>236 | Clta              |
| 192196                       | 5062  | 814 | 86.13% | 45.158<br>34 | 627  | 81.69% | 34.82<br>311 | Luc7l2            |
| 72503                        | 7554  | 814 | 88.81% | 30.260<br>99 | 563  | 76.81% | 20.95<br>335 | 2610507<br>B11Rik |
| 216965                       | 12411 | 813 | 88.81% | 18.395<br>83 | 603  | 76.83% | 13.65<br>943 | Taok1             |

|                                 |       |     |        |              |      |        |              |              |
|---------------------------------|-------|-----|--------|--------------|------|--------|--------------|--------------|
| 75560                           | 10798 | 813 | 82.35% | 21.143<br>79 | 534  | 63.81% | 13.90<br>337 | Ep400        |
| 30960                           | 1658  | 812 | 96.08% | 137.53<br>31 | 907  | 96.74% | 153.7<br>959 | Vapa         |
| 231147                          | 4549  | 811 | 96.57% | 50.065<br>74 | 882  | 90.77% | 54.50<br>982 | Sh3tc1       |
| gi 82617637 ref N<br>M_175258.3 | 8212  | 809 | 93.29% | 27.665<br>29 | 506  | 79.42% | 17.32<br>302 | -            |
| 433375                          | 2138  | 808 | 98.88% | 106.13<br>03 | 911  | 98.78% | 119.7<br>934 | Creg1        |
| 67443                           | 1712  | 807 | 99.30% | 132.37<br>49 | 846  | 99.65% | 138.9<br>277 | Map1lc3<br>b |
| 15975                           | 7025  | 805 | 87.69% | 32.179<br>94 | 675  | 89.22% | 27.01<br>342 | Ifnar1       |
| 16211                           | 5909  | 803 | 96.53% | 38.162<br>54 | 636  | 93.13% | 30.25<br>974 | Kpnb1        |
| 70356                           | 1622  | 802 | 98.46% | 138.85<br>43 | 748  | 98.77% | 129.6<br>501 | St13         |
| 15896                           | 1168  | 800 | 97.17% | 192.34<br>59 | 1224 | 97.09% | 294.6<br>19  | Icam2        |
| 16004                           | 8948  | 800 | 89.16% | 25.107<br>28 | 549  | 73.64% | 17.24<br>918 | Igf2r        |
| 276891                          | 2175  | 799 | 95.13% | 103.16<br>28 | 1772 | 97.56% | 229.0<br>48  | Timd4        |
| 15381                           | 2844  | 799 | 83.05% | 78.895<br>62 | 919  | 86.32% | 90.84<br>647 | Hnrmpc       |
| 66151                           | 1229  | 799 | 95.69% | 182.57<br>05 | 675  | 93.25% | 154.4<br>095 | Prr13        |
| 12518                           | 1327  | 799 | 80.26% | 169.08<br>75 | 487  | 80.41% | 103.1<br>763 | Cd79a        |
| 67500                           | 4478  | 798 | 96.16% | 50.044<br>29 | 850  | 95.87% | 53.36<br>505 | Ccar1        |
| 13548                           | 6035  | 796 | 83.41% | 37.040<br>04 | 700  | 84.77% | 32.60<br>941 | Dyrk1a       |
| 63830                           | 83437 | 796 | 21.30% | 2.6791<br>07 | 977  | 20.60% | 3.291<br>986 | Kcnqlot<br>1 |
| 50849                           | 3121  | 795 | 97.28% | 71.533<br>43 | 741  | 96.76% | 66.74<br>928 | Rnf10        |
| 18706                           | 8917  | 793 | 72.31% | 24.974<br>12 | 561  | 71.08% | 17.68<br>749 | Pik3ca       |
| 54683                           | 688   | 793 | 98.69% | 323.68<br>34 | 1202 | 98.98% | 491.1<br>771 | Prdx5        |
| 51796                           | 3732  | 793 | 96.81% | 59.671<br>54 | 619  | 94.69% | 46.63<br>061 | Srrm1        |

|                              |      |     |        |              |      |        |              |         |
|------------------------------|------|-----|--------|--------------|------|--------|--------------|---------|
| 214855                       | 5699 | 791 | 84.93% | 38.977<br>46 | 907  | 81.05% | 44.74<br>358 | Arid5a  |
| 74182                        | 3703 | 791 | 95.06% | 59.987<br>18 | 538  | 92.90% | 40.84<br>611 | Gpcpd1  |
| 18174                        | 4373 | 790 | 95.43% | 50.732<br>16 | 709  | 91.63% | 45.58<br>153 | Slc11a2 |
| 207304                       | 8988 | 790 | 83.98% | 24.683<br>1  | 606  | 74.19% | 18.95<br>534 | Hectd1  |
| 107321                       | 1673 | 788 | 99.28% | 132.27<br>14 | 682  | 99.58% | 114.6<br>068 | Lpxn    |
| 243819                       | 3812 | 788 | 88.85% | 58.050<br>91 | 566  | 89.38% | 41.74<br>319 | Ppp6r1  |
| 20514                        | 2758 | 787 | 90.72% | 80.133<br>88 | 607  | 94.67% | 61.87<br>519 | Slc1a5  |
| 22378                        | 1795 | 787 | 98.05% | 123.12<br>49 | 728  | 98.05% | 114.0<br>221 | Wbp2    |
| 67281                        | 867  | 787 | 42.21% | 254.91<br>26 | 841  | 42.68% | 272.7<br>087 | Rpl37   |
| 22778                        | 5163 | 787 | 93.74% | 42.806<br>36 | 514  | 86.04% | 27.98<br>872 | Ikzf1   |
| 12982                        | 1850 | 784 | 75.03% | 119.00<br>91 | 957  | 74.70% | 145.4<br>328 | Csf2ra  |
| 11843                        | 2042 | 784 | 78.55% | 107.81<br>92 | 1114 | 85.95% | 153.3<br>739 | Arf4    |
| 13682                        | 3174 | 781 | 70.57% | 69.100<br>28 | 602  | 70.45% | 53.32<br>265 | Eif4a2  |
| 16331                        | 4938 | 780 | 96.07% | 44.358<br>74 | 669  | 93.09% | 38.08<br>879 | Inpp5d  |
| 229096                       | 5306 | 779 | 90.12% | 41.229<br>3  | 628  | 90.58% | 33.27<br>473 | Ythdf3  |
| 107723                       | 6631 | 778 | 90.88% | 32.948<br>55 | 528  | 87.08% | 22.38<br>603 | Slc12a6 |
| 80291                        | 1278 | 777 | 95.93% | 170.73<br>63 | 796  | 98.44% | 175.1<br>073 | Rilpl2  |
| 13197                        | 1224 | 777 | 94.04% | 178.26<br>88 | 1452 | 97.63% | 333.5<br>088 | Gadd45a |
| 11732                        | 3511 | 777 | 97.86% | 62.147<br>82 | 902  | 99%    | 72.22<br>671 | Ank     |
| gi 118129873 ref NM_009859.3 | 2398 | 776 | 96.62% | 90.875<br>8  | 699  | 95.37% | 81.95<br>022 | -       |
| 216705                       | 3398 | 775 | 96%    | 64.049<br>25 | 840  | 93.73% | 69.49<br>892 | Clint1  |
| gi 38455421 ref NM_153537.3  | 5482 | 773 | 94.02% | 39.598<br>27 | 944  | 92.54% | 48.41<br>223 | -       |

|        |      |     |        |              |      |        |              |              |
|--------|------|-----|--------|--------------|------|--------|--------------|--------------|
| 12512  | 959  | 773 | 84.05% | 226.35<br>84 | 715  | 83.52% | 209.6<br>088 | Cd63         |
| 13728  | 4648 | 772 | 91.76% | 46.643<br>04 | 723  | 90.49% | 43.73<br>149 | Mark2        |
| 67245  | 3501 | 770 | 95.46% | 61.763<br>84 | 1109 | 97.57% | 89.05<br>567 | Peli1        |
| 329015 | 6340 | 769 | 93.03% | 34.062<br>21 | 659  | 91.59% | 29.22<br>256 | Atg2a        |
| 15939  | 3272 | 769 | 79.13% | 66.000<br>73 | 884  | 84.78% | 75.95<br>583 | Ier5         |
| 12914  | 7507 | 768 | 93.73% | 28.729<br>66 | 484  | 82.03% | 18.12<br>596 | Crebbp       |
| 19731  | 3887 | 768 | 98.89% | 55.485<br>87 | 999  | 99.77% | 72.25<br>586 | Rgl1         |
| 622976 | 2801 | 766 | 94%    | 76.798<br>26 | 1024 | 97.97% | 102.7<br>801 | Gm6377       |
| 14362  | 4395 | 765 | 90.53% | 48.880<br>8  | 509  | 88.33% | 32.55<br>975 | Fzd1         |
| 26889  | 6432 | 764 | 91.18% | 33.356<br>7  | 872  | 90.62% | 38.11<br>471 | Cln8         |
| 67097  | 573  | 764 | 61.78% | 374.43<br>33 | 751  | 61.08% | 368.4<br>745 | Rps10        |
| 58223  | 3410 | 763 | 77.77% | 62.835<br>61 | 334  | 75.75% | 27.53<br>685 | Mmp19        |
| 74737  | 5804 | 762 | 91.08% | 36.869<br>16 | 759  | 95.93% | 36.76<br>516 | Pcf11        |
| 12385  | 3713 | 762 | 98.01% | 57.632<br>27 | 672  | 96.96% | 50.88<br>227 | Ctnna1       |
| 16155  | 1878 | 761 | 93.40% | 113.79<br>54 | 956  | 97.23% | 143.1<br>148 | Il10rb       |
| 235626 | 8350 | 761 | 88.17% | 25.593<br>75 | 441  | 72.54% | 14.84<br>821 | Setd2        |
| 20044  | 606  | 761 | 58.91% | 352.65<br>31 | 759  | 53.96% | 352.1<br>205 | Rps14        |
| 72567  | 5454 | 760 | 94.70% | 39.132<br>19 | 543  | 87.02% | 27.99<br>025 | Bclaf1       |
| 26554  | 2764 | 759 | 96.45% | 77.115<br>1  | 786  | 97.79% | 79.94<br>782 | Cul3         |
| 23871  | 5060 | 756 | 96.28% | 41.957<br>25 | 273  | 80.91% | 15.16<br>821 | Ets1         |
| 11972  | 1617 | 755 | 99.01% | 131.12<br>11 | 812  | 97.96% | 141.1<br>784 | Atp6v0d<br>1 |
| 83490  | 2615 | 755 | 95.64% | 81.079<br>48 | 579  | 93.42% | 62.24<br>851 | Pik3ap1      |

|                              |       |     |        |              |      |        |              |         |
|------------------------------|-------|-----|--------|--------------|------|--------|--------------|---------|
| 19267                        | 5411  | 755 | 92.07% | 39.183<br>67 | 880  | 93.09% | 45.72<br>221 | Ptpre   |
| 22384                        | 2409  | 755 | 99.09% | 88.012<br>8  | 670  | 97.30% | 78.19<br>16  | Eif4h   |
| 67040                        | 4772  | 754 | 90.36% | 44.371<br>76 | 683  | 89.10% | 40.23<br>856 | Ddx17   |
| 24056                        | 2487  | 752 | 99.64% | 84.913<br>7  | 613  | 98.47% | 69.29<br>578 | Sh3bp5  |
| 11352                        | 10714 | 752 | 84.12% | 19.710<br>69 | 662  | 74.54% | 17.37<br>115 | Abl2    |
| 269261                       | 643   | 751 | 50.70% | 327.99<br>31 | 629  | 48.83% | 275.0<br>184 | Rpl12   |
| 14583                        | 6248  | 751 | 96.83% | 33.754<br>73 | 551  | 89.69% | 24.79<br>321 | Gfpt1   |
| gi 148747197 ref NM_013742.4 | 2749  | 751 | 91.74% | 76.718<br>64 | 744  | 88%    | 76.08<br>873 | -       |
| 245877                       | 3402  | 751 | 94.68% | 61.992<br>81 | 781  | 94.50% | 64.54<br>147 | Mtap7d1 |
| 23943                        | 3687  | 750 | 98.89% | 57.124<br>69 | 621  | 95.55% | 47.35<br>225 | Esyt1   |
| 140570                       | 6497  | 750 | 90.12% | 32.417<br>84 | 636  | 87.87% | 27.52<br>114 | Plxb2   |
| 170625                       | 4466  | 750 | 93.66% | 47.160<br>48 | 1013 | 94.18% | 63.76<br>948 | Snx18   |
| 11501                        | 3034  | 749 | 97.13% | 69.326<br>93 | 865  | 97.79% | 80.15<br>353 | Adam8   |
| 13211                        | 4623  | 748 | 88.30% | 45.437<br>39 | 581  | 90.09% | 35.33<br>25  | Dhx9    |
| 83431                        | 2387  | 746 | 95.52% | 87.765<br>15 | 954  | 94.01% | 112.3<br>616 | Ndel1   |
| 71955                        | 2352  | 745 | 95.03% | 88.951<br>78 | 934  | 95.79% | 111.6<br>43  | Ist1    |
| 18124                        | 1884  | 744 | 99.84% | 110.89<br>9  | 559  | 99.84% | 83.41<br>67  | Nr4a3   |
| 227195                       | 13529 | 744 | 80.14% | 15.443<br>4  | 494  | 62.54% | 10.26<br>558 | Ino80d  |
| 75785                        | 6683  | 743 | 89.18% | 31.221<br>45 | 371  | 78.47% | 15.60<br>718 | Klhl24  |
| 16969                        | 5373  | 742 | 93.58% | 38.781<br>34 | 633  | 87.53% | 33.12<br>142 | Zbtb7a  |
| 114584                       | 1159  | 741 | 94.74% | 179.54<br>38 | 807  | 96.89% | 195.7<br>547 | Clic1   |
| 11810                        | 2265  | 740 | 94.30% | 91.748<br>55 | 594  | 94.30% | 73.72<br>934 | Apobec1 |



|        |       |     |        |              |      |        |              |         |
|--------|-------|-----|--------|--------------|------|--------|--------------|---------|
| 330122 | 1030  | 740 | 90.10% | 201.75<br>77 | 1235 | 90.39% | 337.0<br>946 | Cxcl3   |
| 17869  | 2399  | 739 | 91.45% | 86.506<br>73 | 547  | 89.58% | 64.10<br>312 | Myc     |
| 69276  | 3966  | 738 | 72.57% | 52.256<br>38 | 892  | 65.48% | 63.23<br>161 | Sec62   |
| 13709  | 4217  | 738 | 91.01% | 49.146<br>03 | 607  | 88.62% | 40.46<br>758 | Elf1    |
| 71770  | 5411  | 738 | 96.71% | 38.301<br>39 | 529  | 88.71% | 27.48<br>529 | Ap2b1   |
| 53421  | 3039  | 738 | 98.12% | 68.196<br>39 | 724  | 97.50% | 66.97<br>766 | Sec61a1 |
| 20918  | 1242  | 738 | 62.24% | 166.86<br>7  | 1095 | 63.37% | 247.8<br>647 | Eif1    |
| 114874 | 5198  | 738 | 85.53% | 39.870<br>88 | 518  | 80.11% | 28.01<br>661 | Ddhd1   |
| 71704  | 3585  | 737 | 96.40% | 57.731<br>66 | 662  | 94.23% | 51.91<br>477 | Arhgef3 |
| 107368 | 7076  | 736 | 87.13% | 29.209<br>61 | 533  | 78.76% | 21.17<br>686 | Pdzd8   |
| 66882  | 2833  | 735 | 91.92% | 72.857<br>87 | 698  | 89.87% | 69.26<br>773 | Bzw1    |
| 22329  | 3398  | 734 | 88.67% | 60.660<br>84 | 312  | 85.11% | 25.81<br>388 | Vcam1   |
| 109934 | 5263  | 734 | 90.96% | 39.165<br>02 | 747  | 89.32% | 39.90<br>335 | Abr     |
| 19877  | 6187  | 734 | 88.46% | 33.315<br>91 | 777  | 86.76% | 35.30<br>718 | Rock1   |
| 18021  | 6032  | 733 | 94.66% | 34.125<br>45 | 360  | 85.76% | 16.77<br>889 | Nfatc3  |
| 227723 | 10704 | 733 | 83.88% | 19.230<br>63 | 524  | 69.35% | 13.76<br>282 | Prrc2b  |
| 224105 | 4135  | 732 | 97.78% | 49.713<br>15 | 567  | 96.76% | 38.55<br>047 | Pak2    |
| 227333 | 5694  | 731 | 95.40% | 36.052<br>52 | 423  | 84.42% | 20.88<br>551 | Dgkd    |
| 17228  | 1086  | 730 | 95.76% | 188.76<br>82 | 97   | 88.67% | 25.11<br>1   | Cma1    |
| 101685 | 5240  | 729 | 93.24% | 39.068<br>97 | 612  | 90.55% | 32.83<br>54  | Spty2d1 |
| 17227  | 990   | 728 | 98.18% | 206.50<br>56 | 53   | 87.68% | 15.05<br>091 | Mcpt4   |
| 68703  | 7458  | 727 | 87.93% | 27.374<br>6  | 563  | 82.50% | 21.22<br>307 | Rere    |

|                                  |      |     |        |              |     |        |              |                   |
|----------------------------------|------|-----|--------|--------------|-----|--------|--------------|-------------------|
| 252870                           | 5427 | 727 | 87.89% | 37.619<br>26 | 602 | 85.09% | 31.18<br>594 | Usp7              |
| 208606                           | 4234 | 726 | 63.75% | 48.152<br>79 | 642 | 59.40% | 42.62<br>911 | Rsrc2             |
| 57259                            | 3994 | 726 | 96.34% | 51.046<br>3  | 733 | 94.94% | 51.59<br>624 | Tob2              |
| 68365                            | 3100 | 726 | 95.10% | 65.767<br>39 | 619 | 93.97% | 56.13<br>724 | Rab14             |
| gi 118130134 ref N<br>M_152808.2 | 3435 | 726 | 95.28% | 59.353<br>4  | 526 | 92.40% | 43.05<br>079 | -                 |
| 30930                            | 3104 | 724 | 79.54% | 65.501<br>7  | 681 | 83.60% | 61.68<br>045 | Vps26a            |
| gi 118130451 ref N<br>M_028230.3 | 2280 | 722 | 96.84% | 88.927<br>9  | 613 | 98.29% | 75.58<br>711 | -                 |
| 15525                            | 4657 | 722 | 92.55% | 43.537<br>82 | 633 | 84.20% | 38.21<br>374 | Hspa4             |
| 93684                            | 1515 | 721 | 83.63% | 133.64<br>67 | 733 | 79.54% | 136.0<br>233 | 15-Sep            |
| 67804                            | 2013 | 719 | 97.67% | 100.30<br>46 | 628 | 96.77% | 87.70<br>775 | Snx2              |
| 353047                           | 5144 | 718 | 97.82% | 39.197<br>57 | 476 | 90.86% | 26.01<br>526 | Plekhm1           |
| 68465                            | 3963 | 718 | 97.53% | 50.878<br>71 | 661 | 93.77% | 46.89<br>208 | Adipor2           |
| 16341                            | 1541 | 716 | 78.84% | 130.48<br>06 | 731 | 81.51% | 133.3<br>635 | Eif3e             |
| 14693                            | 1593 | 715 | 98.87% | 126.04<br>51 | 771 | 98.56% | 136.0<br>695 | Gnb2              |
| 212168                           | 4348 | 714 | 95.70% | 46.115<br>23 | 961 | 96.07% | 62.13<br>781 | Zswim4            |
| 75423                            | 5212 | 713 | 91.04% | 38.416<br>77 | 520 | 88.01% | 28.04<br>924 | Arl5a             |
| 20525                            | 2573 | 712 | 96.39% | 77.709<br>82 | 822 | 97.67% | 89.81<br>609 | Slc2a1            |
| 217069                           | 5596 | 711 | 93.62% | 35.680<br>23 | 471 | 92.32% | 23.66<br>276 | Trim25            |
| 68420                            | 3316 | 710 | 95.66% | 60.128<br>38 | 662 | 97.74% | 56.12<br>619 | Ankrd13<br>a      |
| 226089                           | 6282 | 710 | 90.45% | 31.739<br>21 | 447 | 83.35% | 20.00<br>468 | C030046<br>E11Rik |
| 56338                            | 2801 | 708 | 97.57% | 70.983<br>25 | 255 | 91.90% | 25.59<br>465 | Txnip             |
| gi 121674796 ref N<br>M_008917.2 | 2478 | 708 | 97.09% | 80.235<br>7  | 872 | 97.38% | 98.93<br>212 | -                 |

|                              |      |     |        |              |      |        |              |         |
|------------------------------|------|-----|--------|--------------|------|--------|--------------|---------|
| 14528                        | 2764 | 708 | 96.92% | 71.933<br>46 | 984  | 95.41% | 100.0<br>873 | Gch1    |
| 26401                        | 6963 | 706 | 87.16% | 28.473<br>71 | 418  | 74.32% | 16.87<br>726 | Map3k1  |
| 100494                       | 3191 | 705 | 93.26% | 62.043<br>75 | 665  | 91.23% | 58.58<br>912 | Zfand2a |
| 76199                        | 9315 | 705 | 89.41% | 21.254<br>06 | 472  | 73.84% | 14.24<br>562 | Med13l  |
| 14020                        | 5849 | 704 | 95.11% | 33.800<br>78 | 545  | 91.49% | 26.19<br>612 | Evi5    |
| 11840                        | 1991 | 704 | 76.24% | 99.297<br>22 | 738  | 77.95% | 104.2<br>095 | Arf1    |
| 11845                        | 3740 | 704 | 93.74% | 52.861<br>17 | 556  | 93.80% | 41.79<br>509 | Arf6    |
| 22436                        | 4587 | 702 | 96.84% | 42.977<br>79 | 820  | 95.55% | 50.25<br>823 | Xdh     |
| 18789                        | 4518 | 702 | 98.49% | 43.634<br>16 | 563  | 92.98% | 35.03<br>356 | Papola  |
| 110962                       | 4046 | 702 | 97.58% | 48.724<br>45 | 526  | 94.34% | 36.54<br>955 | Mbd6    |
| 17261                        | 2459 | 701 | 96.10% | 80.056<br>24 | 531  | 92.35% | 60.70<br>97  | Mef2d   |
| 268470                       | 3974 | 701 | 83.84% | 49.536<br>56 | 680  | 83.14% | 48.10<br>643 | Ube2z   |
| 53313                        | 4606 | 698 | 97.63% | 42.556<br>63 | 805  | 98.09% | 49.13<br>535 | Atp2a3  |
| gi 165905614 ref NM_007782.2 | 3372 | 698 | 88.23% | 58.130<br>43 | 655  | 84.05% | 54.61<br>046 | -       |
| 104015                       | 7085 | 697 | 88.54% | 27.626<br>68 | 520  | 80.07% | 20.63<br>41  | Synj1   |
| 74022                        | 3365 | 696 | 93.34% | 58.084<br>45 | 629  | 95.19% | 52.55<br>181 | Glyr1   |
| 54375                        | 5028 | 695 | 80.71% | 38.817<br>29 | 648  | 79.89% | 36.23<br>28  | Azin1   |
| 16905                        | 3152 | 695 | 94.23% | 61.920<br>48 | 664  | 95.75% | 59.22<br>485 | Lmna    |
| 11740                        | 1238 | 695 | 85.86% | 157.65<br>21 | 813  | 86.59% | 184.6<br>256 | Slc25a5 |
| 230738                       | 2805 | 694 | 98.29% | 69.480<br>4  | 1262 | 98.50% | 126.4<br>878 | Zc3h12a |
| 106572                       | 3476 | 694 | 95.68% | 56.068<br>04 | 620  | 96.84% | 50.14<br>574 | Rab31   |
| 100182                       | 5513 | 694 | 95.21% | 35.351<br>45 | 442  | 90.97% | 22.54<br>013 | Akna    |

|        |      |     |        |              |      |        |              |          |
|--------|------|-----|--------|--------------|------|--------|--------------|----------|
| 16193  | 1087 | 694 | 83.16% | 179.29<br>4  | 2078 | 98.53% | 537.4<br>501 | Il6      |
| 20852  | 3805 | 694 | 97.92% | 51.220<br>11 | 545  | 95.37% | 40.26<br>836 | Stat6    |
| 18807  | 2246 | 694 | 93.19% | 86.773<br>16 | 554  | 91.81% | 69.34<br>611 | Pld3     |
| 17969  | 2721 | 694 | 98.97% | 71.625<br>33 | 646  | 98.57% | 66.74<br>613 | Ncf1     |
| 244237 | 2977 | 693 | 95.13% | 65.371<br>75 | 465  | 93.08% | 43.91<br>332 | Tnfrsf26 |
| 114863 | 3619 | 692 | 67.53% | 53.697<br>4  | 682  | 67.86% | 52.98<br>073 | Prosc    |
| 15277  | 5524 | 692 | 57.28% | 35.179<br>38 | 909  | 58.64% | 46.26<br>284 | Hk2      |
| 71722  | 6104 | 691 | 87.81% | 31.790<br>64 | 539  | 84.39% | 24.82<br>541 | Cic      |
| 12465  | 1769 | 691 | 97.23% | 109.69<br>48 | 711  | 96.21% | 112.9<br>962 | Cct5     |
| 21881  | 3207 | 690 | 69.88% | 60.420<br>71 | 667  | 68.07% | 58.47<br>214 | Tkt      |
| 433256 | 3167 | 689 | 86.55% | 61.095<br>17 | 855  | 85.29% | 75.89<br>972 | Acs15    |
| 100213 | 5295 | 688 | 91.39% | 36.488<br>68 | 528  | 89.03% | 28.03<br>432 | Rusc2    |
| 19155  | 4161 | 687 | 93.34% | 46.365<br>48 | 637  | 91.66% | 43.03<br>916 | Npepps   |
| 12145  | 2636 | 686 | 96.85% | 73.082<br>67 | 491  | 96.32% | 52.36<br>706 | Cxcr5    |
| 71409  | 5851 | 686 | 87.08% | 32.925<br>3  | 446  | 79.37% | 21.43<br>023 | Fmnl2    |
| 19766  | 4512 | 686 | 94.86% | 42.696<br>35 | 676  | 91.20% | 42.12<br>11  | Ripk1    |
| 217692 | 7717 | 685 | 81.05% | 24.927<br>45 | 390  | 70.55% | 14.20<br>817 | Sipa111  |
| 228005 | 6297 | 684 | 56.90% | 30.504<br>09 | 989  | 52.63% | 44.15<br>549 | Ppig     |
| 53319  | 2312 | 683 | 96.80% | 82.959<br>97 | 583  | 93.47% | 70.89<br>292 | Nxf1     |
| 104458 | 2140 | 683 | 97.85% | 89.627<br>78 | 593  | 96.68% | 77.90<br>459 | Rars     |
| 547253 | 7251 | 682 | 91.10% | 26.413<br>27 | 803  | 88.42% | 31.13<br>435 | Parp14   |
| 12648  | 7918 | 682 | 86.99% | 24.188<br>26 | 581  | 83.19% | 20.62<br>922 | Chd1     |

|                                     |       |     |        |              |     |        |              |              |
|-------------------------------------|-------|-----|--------|--------------|-----|--------|--------------|--------------|
| 14376                               | 3859  | 682 | 97.51% | 49.630<br>12 | 624 | 95.59% | 45.46<br>026 | Ganab        |
| 74365                               | 7392  | 681 | 89.65% | 25.871<br>46 | 522 | 84.47% | 19.85<br>321 | Lonrf3       |
| 381305                              | 11011 | 680 | 85.67% | 17.342<br>75 | 479 | 71.21% | 12.23<br>012 | Rc3h1        |
| 15191                               | 2257  | 680 | 92.42% | 84.608<br>32 | 732 | 92.91% | 91.18<br>043 | Hdgf         |
| 105239                              | 4008  | 679 | 93.79% | 47.574<br>89 | 512 | 87.62% | 35.91<br>405 | Rnf44        |
| 67630                               | 6997  | 679 | 89.62% | 27.251<br>7  | 569 | 81.72% | 22.86<br>244 | Samd8        |
| 110095                              | 2821  | 679 | 96.92% | 67.593<br>11 | 888 | 97.24% | 88.49<br>77  | Pygl         |
| 52915                               | 4203  | 678 | 93.79% | 45.300<br>81 | 430 | 90.60% | 28.76<br>28  | Zmiz2        |
| 67812                               | 4093  | 678 | 90.08% | 46.518<br>28 | 746 | 94.38% | 51.24<br>119 | Ubxn4        |
| gi 149254424 ref X<br>M_001479335.1 | 4111  | 678 | 45.49% | 46.314<br>6  | 718 | 42.30% | 49.10<br>199 | -            |
| 109624                              | 4035  | 677 | 97.27% | 47.117<br>35 | 432 | 96.16% | 30.09<br>971 | Cald1        |
| 12483                               | 4097  | 677 | 93.04% | 46.404<br>32 | 400 | 86.04% | 27.44<br>834 | Cd22         |
| 106504                              | 3288  | 676 | 97.99% | 57.736<br>52 | 385 | 94.65% | 32.91<br>933 | Stk38        |
| 66335                               | 2117  | 675 | 96.74% | 89.540<br>32 | 617 | 96.32% | 81.93<br>82  | Atp6v1c<br>1 |
| gi 33147081 ref N<br>M_057171.1     | 3708  | 673 | 91.34% | 50.969<br>58 | 610 | 94.23% | 46.25<br>005 | -            |
| 227541                              | 7128  | 672 | 91.78% | 26.475<br>08 | 648 | 87.28% | 25.55<br>815 | Camk1d       |
| 108155                              | 5384  | 671 | 95.39% | 34.998<br>8  | 440 | 85.94% | 22.97<br>575 | Ogt          |
| 20320                               | 2077  | 670 | 93.69% | 90.588<br>7  | 744 | 91.82% | 100.7<br>067 | Nptn         |
| 208263                              | 4302  | 670 | 88.73% | 43.736<br>11 | 576 | 86.45% | 37.64<br>213 | Tor1aip1     |
| 106143                              | 4382  | 670 | 96.74% | 42.937<br>64 | 555 | 90.96% | 35.60<br>76  | Cggbp1       |
| 228545                              | 4054  | 669 | 94.06% | 46.342<br>35 | 744 | 95.39% | 51.59<br>544 | Vps18        |
| 23942                               | 3149  | 669 | 94.35% | 59.660<br>81 | 618 | 95.40% | 55.17<br>444 | Mta2         |

|        |       |     |        |              |     |        |              |              |
|--------|-------|-----|--------|--------------|-----|--------|--------------|--------------|
| 64008  | 2644  | 668 | 98.71% | 70.949<br>73 | 610 | 96.22% | 64.86<br>202 | Aqp9         |
| 16362  | 2151  | 667 | 94.93% | 87.080<br>54 | 742 | 95.03% | 96.98<br>077 | Irf1         |
| 56381  | 12299 | 667 | 79.27% | 15.229<br>71 | 332 | 58.39% | 7.589<br>102 | Spn          |
| 64381  | 1116  | 667 | 96.68% | 167.84<br>07 | 770 | 96.86% | 193.9<br>763 | Ms4a8a       |
| 66629  | 2657  | 666 | 96.58% | 70.391<br>2  | 665 | 96.91% | 70.36<br>427 | Golph3       |
| 76650  | 2583  | 666 | 98.84% | 72.407<br>83 | 801 | 99.38% | 87.18<br>268 | Srxn1        |
| 59287  | 2864  | 666 | 93.33% | 65.303<br>57 | 619 | 92.84% | 60.76<br>308 | Ncstn        |
| 235567 | 7697  | 664 | 87.89% | 24.226<br>03 | 431 | 76.52% | 15.74<br>265 | Dnajc13      |
| 66661  | 3605  | 664 | 96.06% | 51.724<br>76 | 615 | 96.14% | 47.96<br>141 | Srp72        |
| 192231 | 3401  | 664 | 94.62% | 54.827<br>34 | 702 | 94.41% | 58.03        | Hexim1       |
| 320790 | 9444  | 664 | 79.69% | 19.744<br>58 | 661 | 75.78% | 19.67<br>739 | Chd7         |
| 231580 | 4453  | 664 | 98.63% | 41.874<br>64 | 524 | 94.59% | 33.08<br>268 | Gak          |
| 20382  | 1903  | 663 | 76.72% | 97.838<br>65 | 699 | 75.30% | 103.2<br>667 | Srsf2        |
| 226652 | 4509  | 663 | 94.41% | 41.292<br>29 | 381 | 89.07% | 23.75<br>565 | Arhgap3<br>0 |
| 20586  | 6376  | 663 | 87.56% | 29.201<br>22 | 502 | 87.85% | 22.13<br>49  | Smarca4      |
| 331401 | 7631  | 663 | 90.45% | 24.398<br>76 | 708 | 90.17% | 26.08<br>398 | Thoc2        |
| 231931 | 1612  | 662 | 97.46% | 115.32<br>64 | 556 | 97.70% | 96.96<br>877 | Gimap6       |
| 114143 | 996   | 661 | 98.69% | 186.37<br>08 | 677 | 98.90% | 191.0<br>959 | Atp6v0b      |
| 58194  | 5029  | 661 | 79.88% | 36.910<br>98 | 700 | 79.04% | 39.13<br>258 | Sh3kbp1      |
| 234779 | 4345  | 660 | 96.85% | 42.656<br>96 | 659 | 95.24% | 42.64<br>005 | Plcg2        |
| 69863  | 8764  | 660 | 92.71% | 21.148<br>39 | 556 | 87.44% | 17.83<br>588 | Ttc39b       |
| 269346 | 3904  | 660 | 59.09% | 47.475<br>53 | 404 | 51.54% | 29.09<br>335 | Slc28a2      |

|        |       |     |        |              |      |        |              |                   |
|--------|-------|-----|--------|--------------|------|--------|--------------|-------------------|
| 74653  | 3601  | 659 | 95.67% | 51.392<br>29 | 728  | 93.56% | 56.83<br>69  | 4930444<br>A02Rik |
| 69227  | 3575  | 655 | 93.37% | 51.451<br>85 | 607  | 89.20% | 47.73<br>476 | 2810407<br>C02Rik |
| 50772  | 4116  | 654 | 41.79% | 44.620<br>88 | 1006 | 41.59% | 68.71<br>392 | Mapk6             |
| 228790 | 6674  | 654 | 92.49% | 27.518<br>66 | 539  | 89.87% | 22.70<br>517 | Asx11             |
| 673094 | 950   | 654 | 98.53% | 193.32<br>58 | 858  | 97.47% | 253.9<br>135 | Cd99              |
| 72033  | 8829  | 653 | 73.17% | 20.770<br>04 | 763  | 71.42% | 24.29<br>602 | Tsc22d2           |
| 19735  | 3009  | 653 | 90.13% | 60.943<br>4  | 394  | 84.51% | 36.81<br>257 | Rgs2              |
| 72611  | 4072  | 653 | 95.21% | 45.034<br>06 | 529  | 95.58% | 36.52<br>33  | Zfp655            |
| 16889  | 2991  | 652 | 96.42% | 61.216<br>27 | 609  | 95.39% | 57.24<br>308 | Lipa              |
| 16201  | 3645  | 652 | 97.37% | 50.232<br>61 | 572  | 97.42% | 44.11<br>849 | Ilf3              |
| 12721  | 1616  | 651 | 96.97% | 113.12<br>94 | 407  | 96.72% | 70.80<br>683 | Coro1a            |
| 17229  | 1088  | 651 | 99.82% | 168.03<br>04 | 61   | 88.42% | 15.76<br>243 | Tpsb2             |
| 17918  | 11684 | 651 | 79.34% | 15.646<br>79 | 430  | 66.42% | 10.34<br>663 | Myo5a             |
| 24010  | 1996  | 651 | 96.64% | 91.591<br>71 | 686  | 96.54% | 96.62<br>415 | Ik                |
| 72472  | 5394  | 650 | 94.90% | 33.840<br>61 | 663  | 95.33% | 34.55<br>61  | Slc16a10          |
| 50797  | 3043  | 649 | 97.08% | 59.893<br>33 | 540  | 92.51% | 49.89<br>005 | Copb2             |
| 83486  | 3104  | 647 | 98%    | 58.535<br>36 | 485  | 96.71% | 43.92<br>807 | Rbm5              |
| 17060  | 2097  | 646 | 91.08% | 86.510<br>69 | 503  | 83.12% | 67.43<br>598 | Blnk              |
| 12925  | 460   | 645 | 86.96% | 393.76<br>54 | 549  | 86.74% | 335.5<br>341 | Crip1             |
| 98238  | 2810  | 645 | 91.60% | 64.459<br>82 | 669  | 91.57% | 66.93<br>325 | Ltrc59            |
| 22323  | 2270  | 645 | 93.22% | 79.793<br>88 | 597  | 95.33% | 73.93<br>849 | Vasp              |
| 19045  | 1363  | 644 | 87.16% | 132.68<br>62 | 697  | 87.23% | 143.7<br>669 | Ppp1ca            |

|                                  |      |     |        |              |      |        |              |              |
|----------------------------------|------|-----|--------|--------------|------|--------|--------------|--------------|
| 74732                            | 2396 | 644 | 97.95% | 75.480<br>5  | 874  | 97.83% | 102.5<br>526 | Stx11        |
| 14387                            | 3756 | 644 | 91.03% | 48.149<br>97 | 632  | 92.81% | 47.30<br>572 | Gaa          |
| 70686                            | 5124 | 644 | 95.30% | 35.294<br>94 | 631  | 92.70% | 34.62<br>122 | Dusp16       |
| 51792                            | 2256 | 644 | 99.16% | 80.164<br>57 | 642  | 97.92% | 80.00<br>517 | Ppp2r1a      |
| 20462                            | 2135 | 643 | 89.27% | 84.576<br>32 | 764  | 90.44% | 100.6<br>045 | Tra2b        |
| 242248                           | 3248 | 642 | 96.09% | 55.507<br>89 | 431  | 91.75% | 37.30<br>64  | Bank1        |
| 17133                            | 1800 | 642 | 99.50% | 100.16<br>09 | 1400 | 99.78% | 218.6<br>642 | Maff         |
| 72729                            | 3138 | 642 | 89.45% | 57.453<br>67 | 574  | 84.35% | 51.42<br>58  | Cdc42se<br>2 |
| 69562                            | 7081 | 641 | 76.06% | 25.421<br>38 | 530  | 70.98% | 21.04<br>279 | Cdk13        |
| 11487                            | 4605 | 640 | 96.24% | 39.028<br>88 | 500  | 89.64% | 30.52<br>548 | Adam10       |
| gi 157041259 ref N<br>M_013511.2 | 4271 | 640 | 91.17% | 42.081<br>01 | 572  | 88.11% | 37.65<br>205 | -            |
| 67712                            | 4162 | 640 | 94.07% | 43.183<br>08 | 922  | 97.65% | 62.28<br>034 | Slc25a37     |
| 319263                           | 5235 | 639 | 89.05% | 34.278<br>35 | 409  | 82.46% | 21.96<br>488 | Pcmt1d1      |
| 108989                           | 7550 | 639 | 46.66% | 23.767<br>83 | 533  | 45.75% | 19.84<br>734 | Tpr          |
| 227929                           | 5735 | 639 | 83.50% | 31.289<br>83 | 471  | 68.98% | 23.08<br>924 | Cytip        |
| 56407                            | 3219 | 638 | 95.46% | 55.659       | 480  | 92.82% | 41.92<br>204 | Trpc4ap      |
| 226519                           | 7622 | 638 | 89.70% | 23.506<br>47 | 369  | 72.58% | 13.61<br>067 | Lamc1        |
| 225876                           | 7268 | 638 | 86.14% | 24.651<br>39 | 432  | 72.06% | 16.71<br>056 | Kdm2a        |
| 12916                            | 2797 | 638 | 76.58% | 64.056<br>61 | 558  | 71.51% | 56.08<br>721 | Crem         |
| 19349                            | 624  | 638 | 99.20% | 287.12<br>55 | 584  | 99.68% | 263.1<br>179 | Rab7         |
| 16898                            | 1005 | 637 | 29.25% | 177.99<br>55 | 766  | 28.56% | 214.2<br>816 | Rps2         |
| 19055                            | 2194 | 637 | 96.95% | 81.533<br>96 | 673  | 98.04% | 86.23<br>837 | Ppp3ca       |



|                                  |       |     |        |              |      |        |              |          |
|----------------------------------|-------|-----|--------|--------------|------|--------|--------------|----------|
| 22324                            | 4168  | 637 | 92.42% | 42.918<br>79 | 472  | 89.44% | 31.83<br>731 | Vav1     |
| 54189                            | 5438  | 637 | 95.37% | 32.895<br>46 | 478  | 90.18% | 24.71<br>217 | Rabep1   |
| 66725                            | 8231  | 637 | 87.02% | 21.733<br>14 | 388  | 73.73% | 13.25<br>26  | Lrrk2    |
| 18187                            | 6739  | 637 | 92.79% | 26.544<br>81 | 285  | 67.41% | 11.88<br>972 | Nrp2     |
| 20971                            | 2460  | 636 | 98.78% | 72.603<br>53 | 1145 | 98.90% | 130.8<br>557 | Sdc4     |
| gi 41053863 ref N<br>M_183208.2  | 5397  | 636 | 95.24% | 33.093<br>33 | 401  | 89.38% | 20.88<br>883 | -        |
| 117198                           | 3513  | 636 | 93.37% | 50.841<br>07 | 481  | 88.81% | 38.49<br>365 | Ivns1abp |
| 66676                            | 3452  | 635 | 90.70% | 51.658<br>13 | 540  | 88.30% | 43.97<br>897 | Tmed7    |
| 22793                            | 2454  | 635 | 91.08% | 72.666<br>61 | 651  | 92.71% | 74.58<br>106 | Zyx      |
| 67819                            | 3145  | 635 | 80.32% | 56.700<br>75 | 631  | 80.41% | 56.40<br>672 | Der11    |
| 19383                            | 1794  | 634 | 84.95% | 99.243<br>6  | 711  | 81.44% | 111.4<br>216 | Raly     |
| 21413                            | 7462  | 634 | 83.33% | 23.859<br>96 | 528  | 76.91% | 19.89<br>302 | Tcf4     |
| 14123                            | 2650  | 633 | 98.19% | 67.080<br>08 | 564  | 96.87% | 59.83<br>501 | Fbrs     |
| 16443                            | 13976 | 632 | 32.33% | 12.699<br>01 | 616  | 35.83% | 12.39<br>139 | Itsn1    |
| 12974                            | 2828  | 632 | 97.28% | 62.758<br>62 | 647  | 96.32% | 64.32<br>014 | Cs       |
| gi 124358949 ref N<br>M_146019.2 | 7194  | 631 | 91.59% | 24.631<br>71 | 464  | 82.03% | 18.13<br>3   | -        |
| 11776                            | 4730  | 631 | 95.56% | 37.463<br>12 | 537  | 91.40% | 31.91<br>797 | Ap3d1    |
| 226747                           | 8831  | 629 | 81.71% | 20.002<br>14 | 417  | 73.54% | 13.27<br>542 | Ahctf1   |
| 12142                            | 5143  | 629 | 97.47% | 34.345<br>5  | 339  | 87.44% | 18.53<br>127 | Prdm1    |
| 12727                            | 4620  | 629 | 90.50% | 38.233<br>53 | 733  | 89%    | 44.60<br>506 | Clcn4-2  |
| 12282                            | 4432  | 628 | 94.49% | 39.791<br>98 | 535  | 91.85% | 33.93<br>721 | Hyou1    |
| 66396                            | 4665  | 626 | 80.02% | 37.684<br>12 | 474  | 77.28% | 28.56<br>596 | Ccdc82   |

|                                  |      |     |        |              |     |        |              |               |
|----------------------------------|------|-----|--------|--------------|-----|--------|--------------|---------------|
| gi 149259591 ref X<br>R_034155.1 | 9679 | 625 | 47.50% | 18.133<br>65 | 372 | 44.06% | 10.80<br>524 | -             |
| 76936                            | 2532 | 625 | 97.79% | 69.318<br>96 | 620 | 95.66% | 68.84<br>147 | Hrnpm         |
| 22763                            | 4612 | 624 | 95.01% | 37.995<br>4  | 531 | 96.60% | 32.36<br>886 | Zfr           |
| 14852                            | 6856 | 624 | 86.65% | 25.559<br>33 | 632 | 86.48% | 25.91<br>602 | Gspt1         |
| 11977                            | 8146 | 624 | 86.88% | 21.511<br>76 | 491 | 75.94% | 16.94<br>569 | Atp7a         |
| 232227                           | 6490 | 623 | 86.09% | 26.957<br>47 | 356 | 73.76% | 15.42<br>153 | Iqsec1        |
| 16649                            | 3726 | 622 | 97.67% | 46.879<br>53 | 595 | 94.82% | 44.89<br>482 | Kpna4         |
| 216984                           | 3944 | 622 | 66.02% | 44.288<br>32 | 543 | 70.23% | 38.70<br>66  | Evi2b         |
| 13589                            | 7330 | 621 | 83.22% | 23.791<br>58 | 623 | 78.13% | 23.89<br>495 | Mapre1        |
| 106869                           | 3368 | 621 | 82.19% | 51.779<br>19 | 670 | 80.05% | 55.92<br>743 | Tnfaip8       |
| 104418                           | 4090 | 620 | 85.94% | 42.570<br>04 | 433 | 77.33% | 29.76<br>369 | Dgkz          |
| 18010                            | 3850 | 620 | 79.79% | 45.223<br>76 | 534 | 71.95% | 38.99<br>444 | Neu1          |
| 16541                            | 1479 | 620 | 88.84% | 117.72<br>24 | 384 | 88.17% | 72.99<br>366 | Napsa         |
| 231834                           | 2652 | 619 | 98.27% | 65.547       | 738 | 97.21% | 78.23<br>57  | Snx8          |
| 12227                            | 3083 | 619 | 86.25% | 56.383<br>6  | 687 | 90.89% | 62.64<br>773 | Btg2          |
| 233726                           | 3117 | 619 | 99.42% | 55.768<br>58 | 441 | 95.73% | 39.77<br>626 | Ipo7          |
| 50918                            | 3017 | 619 | 90.52% | 57.617<br>05 | 563 | 88.80% | 52.46<br>325 | Myadm         |
| 12182                            | 2336 | 619 | 94.14% | 74.413<br>81 | 648 | 96.45% | 77.98<br>737 | Bst1          |
| 210029                           | 2468 | 619 | 79.09% | 70.433<br>81 | 722 | 72.57% | 82.24<br>588 | Metrl         |
| 57436                            | 1773 | 617 | 96.62% | 97.726<br>45 | 676 | 98.65% | 107.1<br>914 | Gabarapl<br>1 |
| 209212                           | 2647 | 615 | 95.88% | 65.246<br>45 | 728 | 97.05% | 77.32<br>137 | Osgin2        |
| 20479                            | 3272 | 615 | 83.53% | 52.783<br>42 | 655 | 87.96% | 56.27<br>949 | Vps4b         |

|                                     |       |     |        |              |     |        |              |         |
|-------------------------------------|-------|-----|--------|--------------|-----|--------|--------------|---------|
| gi 146198855 ref N<br>M_001033245.3 | 3167  | 615 | 98.26% | 54.533<br>42 | 611 | 96.24% | 54.23<br>945 | -       |
| 19698                               | 2218  | 613 | 97.07% | 77.613<br>03 | 573 | 95.63% | 72.62<br>986 | Relb    |
| 338365                              | 4386  | 613 | 99.02% | 39.248<br>91 | 544 | 93.55% | 34.87<br>004 | Slc41a2 |
| 74081                               | 13307 | 613 | 72.62% | 12.936<br>48 | 420 | 59.83% | 8.873<br>424 | Cep350  |
| 69162                               | 4244  | 613 | 96.82% | 40.562<br>14 | 574 | 89.63% | 38.02<br>407 | Sec31a  |
| 239528                              | 8031  | 613 | 93.34% | 21.435<br>15 | 263 | 69.75% | 9.206<br>79  | Eif2c2  |
| 78943                               | 3976  | 612 | 97.91% | 43.225<br>57 | 347 | 96.13% | 24.53<br>608 | Ern1    |
| 104318                              | 3749  | 612 | 96.40% | 45.842<br>86 | 508 | 95.04% | 38.09<br>521 | Csnk1d  |
| 11852                               | 2264  | 611 | 98.19% | 75.788<br>01 | 433 | 94.08% | 53.76<br>92  | Rhob    |
| 223601                              | 3808  | 611 | 66.05% | 45.058<br>84 | 607 | 57.46% | 44.81<br>402 | Fam49b  |
| 67248                               | 394   | 611 | 92.89% | 435.49<br>25 | 689 | 82.74% | 491.6<br>376 | Rpl39   |
| 69232                               | 3362  | 611 | 96.67% | 51.036<br>3  | 521 | 95.33% | 43.56<br>745 | Qrich1  |
| gi 87299636 ref N<br>M_001039520.1  | 3483  | 610 | 95.49% | 49.182<br>67 | 517 | 96.55% | 41.73<br>104 | -       |
| gi 170650622 ref N<br>M_019808.2    | 3975  | 610 | 73.08% | 43.095<br>15 | 450 | 71.90% | 31.82<br>713 | -       |
| 105689                              | 15269 | 609 | 66.67% | 11.200<br>63 | 530 | 56.51% | 9.758<br>597 | Mycbp2  |
| 74838                               | 6090  | 608 | 84.84% | 28.036<br>38 | 723 | 78.57% | 33.37<br>668 | Naa15   |
| 83429                               | 3010  | 608 | 84.52% | 56.724<br>78 | 527 | 84.02% | 49.22<br>279 | Ctns    |
| 15163                               | 2031  | 608 | 98.33% | 84.067<br>74 | 739 | 99.06% | 102.2<br>955 | Hcls1   |
| 192185                              | 3053  | 607 | 94.20% | 55.833<br>85 | 592 | 95.28% | 54.51<br>513 | Nadk    |
| 66168                               | 1693  | 607 | 99%    | 100.68<br>56 | 553 | 99.17% | 91.83<br>121 | Grina   |
| 224109                              | 3559  | 607 | 81.37% | 47.895<br>69 | 345 | 71.62% | 27.25<br>293 | Lrrc33  |
| 234135                              | 9945  | 606 | 74.06% | 17.112<br>11 | 518 | 68.04% | 14.64<br>357 | Whsc111 |

|        |       |     |        |              |      |        |              |              |
|--------|-------|-----|--------|--------------|------|--------|--------------|--------------|
| 228852 | 6392  | 606 | 85.39% | 26.623<br>89 | 351  | 70.82% | 15.43<br>805 | Ppp1r16<br>b |
| 93687  | 2013  | 605 | 99.55% | 84.400<br>95 | 713  | 99.06% | 99.57<br>903 | Csnk1a1      |
| 18242  | 2155  | 604 | 95.59% | 78.709<br>18 | 637  | 96.06% | 83.10<br>254 | Oat          |
| 14155  | 6505  | 604 | 91.13% | 26.075<br>06 | 623  | 90.59% | 26.92<br>544 | Fem1b        |
| 65107  | 3013  | 604 | 95.15% | 56.295<br>48 | 543  | 92.83% | 50.66<br>672 | Lrp10        |
| 108100 | 3186  | 604 | 94.44% | 53.238<br>63 | 675  | 97.08% | 59.56<br>349 | Baiap2       |
| 242687 | 4088  | 603 | 97.80% | 41.423<br>06 | 360  | 94.59% | 24.75<br>79  | Wasf2        |
| 12143  | 2475  | 602 | 97.29% | 68.305<br>71 | 388  | 94.14% | 44.07<br>361 | Blk          |
| 321022 | 4051  | 602 | 72.50% | 41.732<br>07 | 674  | 67.79% | 46.77<br>564 | Cdv3         |
| 14466  | 1938  | 602 | 92.83% | 87.232<br>52 | 559  | 96.90% | 81.09<br>24  | Gba          |
| 17524  | 2458  | 601 | 81%    | 68.663<br>87 | 691  | 89.42% | 79.03<br>479 | Mpp1         |
| 192652 | 6976  | 601 | 91.56% | 24.193<br>78 | 365  | 70.83% | 14.70<br>986 | Wdr81        |
| 105504 | 4659  | 601 | 91.07% | 36.225<br>76 | 558  | 90.73% | 33.67<br>159 | Exoc5        |
| 192195 | 11293 | 601 | 78.39% | 14.945<br>17 | 373  | 62.56% | 9.285<br>849 | Ash11        |
| 22019  | 4649  | 600 | 93.89% | 36.243<br>27 | 586  | 95.93% | 35.43<br>726 | Tpp2         |
| 243910 | 2010  | 600 | 97.66% | 83.828<br>35 | 1052 | 97.86% | 147.1<br>437 | Nfkbid       |
| 107182 | 8509  | 600 | 85.34% | 19.801<br>97 | 416  | 71.22% | 13.74<br>475 | Btaf1        |
| 170760 | 3487  | 600 | 93.60% | 48.320<br>9  | 588  | 92.80% | 47.40<br>755 | Acbd3        |
| 18087  | 7026  | 599 | 87.92% | 23.941<br>67 | 492  | 85.61% | 19.68<br>698 | Nktr         |
| 78610  | 3438  | 599 | 96.19% | 48.927<br>91 | 622  | 93.02% | 50.86<br>355 | Uvrag        |
| 110052 | 2606  | 598 | 98.04% | 64.441<br>03 | 540  | 97.54% | 58.25<br>611 | Dek          |
| 69718  | 5432  | 597 | 92.42% | 30.863<br>86 | 493  | 87.63% | 25.51<br>581 | Ipmk         |

|                                  |       |     |        |              |     |        |              |              |
|----------------------------------|-------|-----|--------|--------------|-----|--------|--------------|--------------|
| 22166                            | 1051  | 597 | 56.33% | 159.51<br>71 | 878 | 52.62% | 234.8<br>626 | Txn1         |
| 12394                            | 7137  | 597 | 91.03% | 23.490<br>61 | 596 | 92.77% | 23.47<br>754 | Runx1        |
| 71310                            | 5864  | 596 | 88.92% | 28.542<br>24 | 339 | 79.37% | 16.25<br>279 | Tbc1d9       |
| 229003                           | 10124 | 596 | 84.16% | 16.532<br>17 | 486 | 65.82% | 13.49<br>604 | BC0067<br>79 |
| 83921                            | 6667  | 596 | 89.68% | 25.104<br>5  | 876 | 85.68% | 36.93<br>99  | Tmem2        |
| 270110                           | 4530  | 596 | 94.42% | 36.947<br>39 | 531 | 85.76% | 32.95<br>478 | Irf2bp2      |
| 16956                            | 4049  | 596 | 65.05% | 41.336<br>55 | 809 | 66.56% | 56.17<br>238 | Lpl          |
| 109168                           | 6485  | 594 | 87%    | 25.722<br>44 | 350 | 74.91% | 15.17<br>33  | Atl3         |
| 13654                            | 2972  | 594 | 97.71% | 56.127<br>2  | 673 | 97.04% | 63.66<br>319 | Egr2         |
| 72117                            | 4526  | 594 | 92.82% | 36.855<br>95 | 620 | 90.57% | 38.51<br>228 | Naa50        |
| 14360                            | 3544  | 594 | 91.39% | 47.068<br>29 | 470 | 90.69% | 37.28<br>432 | Fyn          |
| 83701                            | 3039  | 594 | 95.69% | 54.889<br>78 | 560 | 95.29% | 51.80<br>593 | Srrt         |
| 16421                            | 2696  | 592 | 96.74% | 61.664<br>83 | 832 | 97.66% | 86.76<br>12  | Itgb7        |
| 27399                            | 4429  | 592 | 97.02% | 37.536<br>32 | 414 | 91.89% | 26.27<br>948 | Ip6k1        |
| 11800                            | 3702  | 592 | 80.09% | 44.907<br>72 | 512 | 80.28% | 38.88<br>263 | Api5         |
| 12314                            | 1216  | 592 | 87.91% | 136.71<br>74 | 579 | 88.57% | 133.8<br>65  | Calm2        |
| 21849                            | 3255  | 591 | 78.77% | 50.988<br>5  | 461 | 77.36% | 39.81<br>732 | Trim28       |
| 11847                            | 1417  | 591 | 80.17% | 117.12<br>6  | 612 | 80.66% | 121.4<br>238 | Arg2         |
| gi 118130692 ref N<br>M_008676.2 | 4444  | 590 | 96.87% | 37.283<br>24 | 426 | 92.06% | 26.94<br>993 | -            |
| 227648                           | 8754  | 590 | 85.97% | 18.926<br>97 | 371 | 70.22% | 11.91<br>487 | Sec16a       |
| 18987                            | 3323  | 590 | 98.07% | 49.860<br>59 | 444 | 96.12% | 37.56<br>425 | Pou2f2       |
| 83946                            | 10729 | 590 | 83.42% | 15.442<br>89 | 476 | 70.38% | 12.47<br>297 | Phip         |

|                                     |       |     |        |              |      |        |              |              |
|-------------------------------------|-------|-----|--------|--------------|------|--------|--------------|--------------|
| 18193                               | 12784 | 589 | 74.81% | 12.938<br>51 | 366  | 61.14% | 8.048<br>898 | Nsd1         |
| 22433                               | 1817  | 589 | 96.86% | 91.032<br>42 | 755  | 99.01% | 116.8<br>192 | Xbp1         |
| 104263                              | 4868  | 588 | 90.39% | 33.920<br>52 | 500  | 88.29% | 28.87<br>63  | Kdm3a        |
| 269966                              | 4070  | 588 | 93.83% | 40.571<br>27 | 405  | 89.78% | 27.97<br>581 | Nup98        |
| gi 16716508 ref N<br>M_053202.1     | 2118  | 588 | 98.44% | 77.962<br>74 | 500  | 97.59% | 66.36<br>914 | -            |
| 67475                               | 4255  | 588 | 95.91% | 38.807<br>3  | 379  | 92.69% | 25.04<br>158 | Ero11b       |
| 16598                               | 1816  | 587 | 95.43% | 90.773<br>27 | 292  | 88.71% | 45.20<br>528 | Klf2         |
| 107767                              | 3605  | 586 | 99.36% | 45.648<br>66 | 570  | 97.89% | 44.45<br>204 | Scamp1       |
| 103963                              | 3642  | 586 | 61.26% | 45.184<br>91 | 559  | 61.67% | 43.15<br>131 | Rpn1         |
| 29808                               | 13931 | 586 | 71.24% | 11.812<br>75 | 364  | 55.05% | 7.345<br>836 | Mga          |
| 218210                              | 6021  | 585 | 88.03% | 27.284<br>94 | 402  | 80.63% | 18.77<br>066 | Nup153       |
| 54198                               | 1377  | 584 | 85.91% | 119.10<br>08 | 577  | 82.93% | 117.8<br>051 | Snx3         |
| 104215                              | 4159  | 584 | 82.78% | 39.432<br>98 | 488  | 78.96% | 32.98<br>777 | Rhoq         |
| 16878                               | 4015  | 584 | 92.58% | 40.847<br>27 | 2482 | 94.30% | 173.7<br>954 | Lif          |
| gi 149261251 ref X<br>M_001473421.1 | 7326  | 583 | 41.74% | 22.347<br>93 | 458  | 41.80% | 17.57<br>603 | -            |
| 22210                               | 2141  | 583 | 85.24% | 76.469<br>38 | 521  | 87.58% | 68.41<br>371 | Ube2b        |
| 233908                              | 1845  | 583 | 81.36% | 88.737<br>64 | 672  | 88.35% | 102.3<br>988 | Fus          |
| 211286                              | 2447  | 583 | 97.30% | 66.906<br>81 | 611  | 96.53% | 70.19<br>875 | Cln5         |
| 19157                               | 3179  | 582 | 95.06% | 51.412<br>43 | 535  | 95.47% | 47.31<br>353 | Cyth1        |
| 110960                              | 2636  | 582 | 98.52% | 62.003<br>08 | 440  | 96.93% | 46.92<br>771 | Tars         |
| 320632                              | 6740  | 581 | 91.38% | 24.207<br>61 | 400  | 78.12% | 16.68<br>485 | Snrnp20<br>0 |
| 64383                               | 1863  | 581 | 96.83% | 87.578<br>8  | 584  | 96.94% | 88.12<br>966 | Sirt2        |

|                                 |       |     |        |              |     |        |              |             |
|---------------------------------|-------|-----|--------|--------------|-----|--------|--------------|-------------|
| 20924                           | 3561  | 581 | 97.44% | 45.818<br>39 | 570 | 96.69% | 45.00<br>129 | Supt5h      |
| 75234                           | 2532  | 580 | 94.04% | 64.327<br>99 | 563 | 89.53% | 62.51<br>249 | Rnf19b      |
| 18439                           | 4931  | 580 | 95.82% | 33.031<br>53 | 478 | 88.66% | 27.25<br>304 | P2rx7       |
| 64652                           | 5606  | 580 | 91.71% | 29.054<br>31 | 519 | 89.58% | 26.02<br>774 | Nisch       |
| 80876                           | 646   | 579 | 73.68% | 251.69<br>92 | 733 | 78.48% | 319.0<br>021 | Ifitm2      |
| 78920                           | 2767  | 579 | 96.13% | 58.763<br>16 | 461 | 94.94% | 46.83<br>968 | Dlst        |
| 15212                           | 1922  | 578 | 91.83% | 84.452<br>04 | 686 | 91.78% | 100.3<br>443 | Hexb        |
| 14357                           | 3715  | 578 | 95.10% | 43.692<br>28 | 336 | 84.79% | 25.42<br>744 | Dtx1        |
| 231386                          | 3034  | 577 | 97.89% | 53.406<br>72 | 590 | 94%    | 54.67<br>119 | Ythdc1      |
| 73274                           | 3624  | 577 | 92.27% | 44.711<br>92 | 555 | 88.27% | 43.05<br>533 | Gpbp1       |
| 69780                           | 2923  | 576 | 94.01% | 55.338<br>75 | 411 | 91%    | 39.53<br>076 | Smap2       |
| 26405                           | 10791 | 576 | 79.24% | 14.989<br>82 | 477 | 70.32% | 12.42<br>736 | Map3k2      |
| 72895                           | 6470  | 576 | 92.83% | 25.000<br>8  | 368 | 77.94% | 15.99<br>063 | Setd5       |
| 97212                           | 3835  | 575 | 70.30% | 42.105<br>44 | 557 | 70.14% | 40.83<br>306 | Hadha       |
| 20926                           | 6201  | 575 | 58.99% | 26.040<br>05 | 565 | 56.14% | 25.61<br>585 | Supt6h      |
| 72265                           | 2888  | 573 | 87.74% | 55.717<br>7  | 562 | 93.59% | 54.70<br>931 | Tram1       |
| 56431                           | 1918  | 572 | 88.74% | 83.749<br>68 | 581 | 86.50% | 85.16<br>274 | Dstn        |
| 18037                           | 2422  | 571 | 99.50% | 66.206<br>05 | 591 | 99.05% | 68.60<br>179 | Nfkbie      |
| gi 90669982 ref N<br>M_053009.2 | 6541  | 570 | 54.87% | 24.471<br>83 | 510 | 54.47% | 21.92<br>038 | -           |
| 18432                           | 4215  | 570 | 96.75% | 37.976<br>33 | 489 | 91.79% | 32.61<br>62  | Mybbp1<br>a |
| 116848                          | 8369  | 568 | 89.02% | 19.059<br>45 | 338 | 69.21% | 11.35<br>443 | Baz2a       |
| 211770                          | 4026  | 567 | 86.02% | 39.549<br>86 | 723 | 83.63% | 50.48<br>782 | Trib1       |

|                                  |      |     |        |              |      |        |              |                   |
|----------------------------------|------|-----|--------|--------------|------|--------|--------------|-------------------|
| 17386                            | 2675 | 567 | 97.91% | 59.524<br>39 | 285  | 89.91% | 29.95<br>32  | Mmp13             |
| 19346                            | 3243 | 567 | 91.27% | 49.098<br>91 | 506  | 88.50% | 43.86<br>576 | Rab6a             |
| 228836                           | 4867 | 567 | 53.03% | 32.715<br>79 | 567  | 52.93% | 32.75<br>245 | Dlgap4            |
| 20194                            | 650  | 565 | 96.15% | 244.10<br>17 | 696  | 97.69% | 301.0<br>357 | S100a10           |
| 70497                            | 3551 | 565 | 91.10% | 44.682<br>09 | 476  | 90.45% | 37.68<br>586 | Arhgap1<br>7      |
| 74343                            | 2647 | 565 | 90.86% | 59.941<br>86 | 544  | 94.52% | 57.77<br>861 | Crtc2             |
| 18000                            | 3267 | 565 | 95.19% | 48.566<br>3  | 552  | 96.69% | 47.50<br>202 | 2-Sep             |
| 67742                            | 1845 | 565 | 94.42% | 85.997<br>89 | 1085 | 98.54% | 165.3<br>315 | Samsn1            |
| 67772                            | 8190 | 564 | 84.59% | 19.338<br>86 | 354  | 64.85% | 12.15<br>182 | Chd8              |
| 75345                            | 3977 | 564 | 89.01% | 39.825<br>32 | 326  | 85.77% | 23.04<br>539 | Slamf7            |
| 109019                           | 2838 | 563 | 95.56% | 55.709<br>81 | 477  | 90.20% | 47.25<br>286 | Nabp1             |
| 234839                           | 8216 | 563 | 79.07% | 19.243<br>48 | 462  | 70.58% | 15.80<br>897 | Fam38a            |
| 19357                            | 3632 | 563 | 96.04% | 43.530<br>96 | 427  | 91.80% | 33.05<br>249 | Rad21             |
| 68774                            | 1401 | 563 | 96%    | 112.85<br>11 | 551  | 97%    | 110.5<br>696 | Ms4a6d            |
| 12469                            | 2391 | 563 | 91.30% | 66.124<br>82 | 527  | 92.22% | 61.96<br>596 | Cct8              |
| gi 133893356 ref N<br>M_007616.3 | 2487 | 562 | 96.78% | 63.459<br>44 | 571  | 97.63% | 64.54<br>795 | -                 |
| 58172                            | 5730 | 562 | 87.07% | 27.543<br>39 | 621  | 87.49% | 30.46<br>906 | Sertad2           |
| 55935                            | 4691 | 562 | 85.93% | 33.643<br>92 | 380  | 83.59% | 22.77<br>405 | Fnbp4             |
| 654820                           | 2380 | 562 | 89.79% | 66.312<br>45 | 877  | 89.66% | 103.5<br>964 | G530011<br>O06Rik |
| 230784                           | 2677 | 561 | 99.14% | 58.850<br>51 | 459  | 96.79% | 48.20<br>437 | Sesn2             |
| 22221                            | 3857 | 561 | 83.28% | 40.845<br>94 | 429  | 79.23% | 31.27<br>014 | Ubp1              |
| 11429                            | 2785 | 561 | 95.98% | 56.568<br>33 | 554  | 91.42% | 55.92<br>509 | Aco2              |



|                              |       |     |        |              |     |        |              |                |
|------------------------------|-------|-----|--------|--------------|-----|--------|--------------|----------------|
| 213053                       | 4927  | 561 | 88.74% | 31.975<br>4  | 422 | 90.89% | 24.07<br>975 | Slc39a14       |
| 58231                        | 5189  | 561 | 95.43% | 30.360<br>92 | 338 | 83.54% | 18.31<br>282 | Stk4           |
| 213827                       | 3470  | 561 | 89.86% | 45.401<br>38 | 612 | 87.20% | 49.58<br>429 | Arcn1          |
| 232989                       | 2884  | 560 | 99.24% | 54.529<br>12 | 456 | 96.57% | 44.45<br>204 | Hnrnpul<br>1   |
| 224139                       | 11025 | 560 | 74.67% | 14.264<br>13 | 382 | 63.87% | 9.741<br>075 | Golgb1         |
| 231051                       | 16820 | 560 | 66.02% | 9.3497<br>01 | 411 | 50.96% | 6.869<br>703 | Mll3           |
| 27979                        | 2966  | 560 | 83.85% | 53.021<br>57 | 550 | 79.43% | 52.13<br>311 | Eif3b          |
| 24015                        | 3813  | 559 | 90.01% | 41.169<br>99 | 455 | 90.11% | 33.54<br>801 | Abce1          |
| 14701                        | 4264  | 559 | 91.79% | 36.815<br>47 | 534 | 93.32% | 35.20<br>839 | Gng12          |
| 73130                        | 3751  | 559 | 51.67% | 41.850<br>48 | 657 | 54.17% | 49.24<br>254 | Tmed5          |
| 56041                        | 3914  | 559 | 92.95% | 40.107<br>6  | 514 | 94.71% | 36.92<br>023 | Uso1           |
| 378702                       | 3029  | 558 | 51.67% | 51.733<br>35 | 763 | 52.29% | 70.81<br>861 | Serf2          |
| 104759                       | 1978  | 557 | 98.08% | 79.079<br>63 | 611 | 97.37% | 86.84<br>344 | Pld4           |
| 108960                       | 3209  | 557 | 88.81% | 48.744       | 435 | 89.56% | 38.11<br>024 | Irak2          |
| gi 118129927 ref NM_010147.3 | 2493  | 556 | 97.59% | 62.630<br>84 | 501 | 94.18% | 56.49<br>858 | -              |
| 20501                        | 4426  | 556 | 69.79% | 35.277<br>6  | 578 | 70.04% | 36.71<br>458 | Slc16a1        |
| gi 146198676 ref NM_207217.3 | 2629  | 555 | 99.13% | 59.284<br>08 | 596 | 99.54% | 63.73<br>497 | -              |
| 28109                        | 3535  | 555 | 97.11% | 44.089<br>92 | 582 | 96.18% | 46.28<br>664 | D10Wsu<br>102e |
| 76055                        | 4797  | 555 | 93.95% | 32.490<br>69 | 414 | 88.66% | 24.26<br>346 | Mgea5          |
| 192193                       | 5858  | 555 | 90.30% | 26.605<br>98 | 416 | 78.15% | 19.96<br>485 | Edem1          |
| 16430                        | 2697  | 555 | 98.67% | 57.789<br>34 | 513 | 98.26% | 53.47<br>595 | Stt3a          |
| 73834                        | 1410  | 555 | 93.12% | 110.53<br>75 | 556 | 90.71% | 110.8<br>607 | Atp6v1d        |

|        |      |     |        |              |      |        |              |                   |
|--------|------|-----|--------|--------------|------|--------|--------------|-------------------|
| 320165 | 7695 | 555 | 87.42% | 20.254<br>43 | 426  | 73.63% | 15.56<br>407 | Tacc1             |
| 70231  | 2484 | 555 | 90.94% | 62.744<br>71 | 488  | 94.36% | 55.23<br>195 | Gorasp2           |
| 279572 | 4014 | 554 | 97.83% | 38.758<br>6  | 579  | 97.96% | 40.55<br>303 | Tlr13             |
| 70097  | 7183 | 553 | 62.54% | 21.619<br>96 | 576  | 59.99% | 22.54<br>44  | Sash1             |
| 223593 | 4038 | 552 | 95.22% | 38.389<br>15 | 414  | 93.34% | 28.82<br>413 | E430025<br>E21Rik |
| 230594 | 6054 | 552 | 82.77% | 25.605<br>45 | 491  | 79.90% | 22.80<br>138 | Zcchc11           |
| 70572  | 4598 | 552 | 88.02% | 33.713<br>65 | 467  | 84.86% | 28.55<br>42  | Ipo5              |
| 26431  | 5027 | 551 | 93.36% | 30.780<br>7  | 435  | 92.38% | 24.32<br>778 | Git2              |
| 75089  | 6446 | 551 | 93.61% | 24.004<br>74 | 409  | 84.47% | 17.83<br>837 | Uhrf1bp<br>11     |
| 74123  | 4056 | 550 | 93.47% | 38.080<br>31 | 497  | 91.30% | 34.44<br>931 | Foxp4             |
| 20652  | 4785 | 550 | 90.26% | 32.278<br>73 | 376  | 86.14% | 22.09<br>164 | Soat1             |
| 11520  | 1887 | 550 | 91.36% | 81.851<br>47 | 488  | 87.81% | 72.70<br>596 | Plin2             |
| 56458  | 5552 | 549 | 90.22% | 27.768<br>89 | 434  | 84.31% | 21.97<br>67  | Foxo1             |
| 103583 | 4019 | 548 | 91.59% | 38.291<br>14 | 436  | 93.68% | 30.49<br>935 | Fbxw11            |
| 24017  | 2676 | 548 | 93.87% | 57.508<br>25 | 455  | 91.70% | 47.80<br>215 | Rnf13             |
| 20591  | 6267 | 548 | 89.47% | 24.555<br>94 | 410  | 79.99% | 18.39<br>273 | Kdm5c             |
| 101943 | 4299 | 547 | 97.12% | 35.731<br>86 | 480  | 90.44% | 31.39<br>033 | Sf3b3             |
| 16402  | 4397 | 546 | 91.18% | 34.871<br>6  | 1117 | 92.72% | 71.41<br>983 | Itga5             |
| 77853  | 4934 | 546 | 84.52% | 31.076<br>29 | 563  | 87.45% | 32.07<br>978 | Msl2              |
| 19224  | 2864 | 546 | 95.74% | 53.537<br>16 | 785  | 96.68% | 77.05<br>818 | Ptgs1             |
| 16423  | 1928 | 546 | 97.46% | 79.528<br>23 | 397  | 96.89% | 57.89<br>027 | Cd47              |
| 17936  | 5098 | 546 | 69.56% | 30.076<br>58 | 590  | 69.30% | 32.53<br>676 | Nab1              |

|                                  |      |     |        |              |     |        |              |             |
|----------------------------------|------|-----|--------|--------------|-----|--------|--------------|-------------|
| 269061                           | 3604 | 545 | 95.73% | 42.466<br>59 | 437 | 90.34% | 34.08<br>935 | Cpsf7       |
| 67123                            | 2716 | 545 | 91.57% | 56.351<br>11 | 536 | 91.86% | 55.48<br>264 | Ubap1       |
| 68135                            | 1254 | 545 | 81.90% | 122.04<br>91 | 638 | 83.73% | 143.0<br>36  | Eif3h       |
| 19015                            | 3240 | 544 | 98.15% | 47.150<br>86 | 557 | 95.93% | 48.33<br>173 | Ppard       |
| 217615                           | 2930 | 544 | 88.77% | 52.139<br>52 | 464 | 90.58% | 44.52<br>178 | Ctage5      |
| 71268                            | 3260 | 544 | 83.56% | 46.861<br>59 | 536 | 86.13% | 46.22<br>419 | Lrrfip2     |
| 19821                            | 3028 | 544 | 96.10% | 50.452<br>04 | 459 | 97.82% | 42.61<br>661 | Rnf2        |
| 21812                            | 5735 | 544 | 93.83% | 26.637<br>97 | 477 | 85.86% | 23.38<br>337 | Tgfbf1      |
| 11991                            | 6810 | 543 | 38.27% | 22.391<br>77 | 530 | 42%    | 21.88<br>018 | Hnrnpd      |
| 20687                            | 4191 | 543 | 88.31% | 36.384<br>62 | 356 | 84.90% | 23.88<br>111 | Sp3         |
| 226971                           | 3317 | 543 | 97.05% | 45.971<br>65 | 462 | 97.32% | 39.15<br>783 | Plekhb2     |
| 13198                            | 879  | 543 | 93.63% | 173.47<br>89 | 544 | 94.65% | 173.9<br>931 | Ddit3       |
| 326618                           | 2082 | 543 | 89.43% | 73.241<br>09 | 484 | 89%    | 65.35<br>619 | Tpm4        |
| 23789                            | 1860 | 543 | 93.39% | 81.982<br>77 | 502 | 97.63% | 75.87<br>748 | Coro1b      |
| 12857                            | 679  | 543 | 98.09% | 224.57<br>73 | 668 | 98.38% | 276.5<br>851 | Cox4i1      |
| 66660                            | 3691 | 542 | 95.29% | 41.237<br>37 | 562 | 93.66% | 42.80<br>696 | Sltm        |
| gi 145301554 ref N<br>M_133656.3 | 3620 | 542 | 97.51% | 42.046<br>17 | 522 | 96.49% | 40.54<br>003 | -           |
| 12466                            | 2189 | 541 | 96.39% | 69.404<br>43 | 430 | 97.35% | 55.22<br>616 | Cct6a       |
| 15388                            | 2142 | 541 | 95.14% | 70.927<br>31 | 407 | 87.25% | 53.41<br>916 | Hnrnpl      |
| 26413                            | 5099 | 541 | 86.70% | 29.795<br>31 | 450 | 78.96% | 24.81<br>131 | Mapk1       |
| 407243                           | 1700 | 540 | 90.06% | 89.203<br>22 | 499 | 92.47% | 82.52<br>276 | Tmem18<br>9 |
| 12304                            | 2610 | 540 | 84.64% | 58.101<br>72 | 394 | 85.75% | 42.44<br>024 | Pdia4       |

|                                 |       |     |        |              |     |        |              |                   |
|---------------------------------|-------|-----|--------|--------------|-----|--------|--------------|-------------------|
| gi 164565376 ref NM_133671.2    | 2145  | 540 | 76.27% | 70.697<br>19 | 548 | 74.50% | 71.82<br>496 | -                 |
| 18718                           | 3471  | 540 | 97.78% | 43.689<br>28 | 455 | 96.43% | 36.85<br>351 | Pip4k2a           |
| 21937                           | 2186  | 539 | 94.46% | 69.242<br>75 | 566 | 94.19% | 72.79<br>279 | Tnfrsf1a          |
| 15258                           | 4259  | 539 | 86.83% | 35.539<br>95 | 346 | 87.23% | 22.83<br>971 | Hipk2             |
| 224432                          | 4193  | 539 | 95.61% | 36.099<br>37 | 469 | 89.53% | 31.44<br>634 | Scaf4             |
| 66890                           | 4315  | 539 | 94.14% | 35.078<br>71 | 451 | 92.03% | 29.38<br>447 | Lman2             |
| 244349                          | 9126  | 539 | 82.81% | 16.586<br>09 | 351 | 68.49% | 10.81<br>306 | Myst3             |
| 19326                           | 6065  | 538 | 83.74% | 24.910<br>77 | 496 | 77.63% | 22.99<br>18  | Rab11b            |
| 80517                           | 2744  | 537 | 94.10% | 54.957<br>36 | 490 | 88.34% | 50.20<br>351 | Herpud2           |
| 14042                           | 3478  | 537 | 90.83% | 43.359<br>12 | 445 | 92.24% | 35.97<br>1   | Ext1              |
| 76740                           | 5210  | 537 | 92.32% | 28.944<br>91 | 512 | 82.80% | 27.62<br>831 | Efr3a             |
| 12380                           | 2894  | 537 | 96.96% | 52.108<br>85 | 506 | 95.58% | 49.15<br>573 | Cast              |
| 625249                          | 1012  | 536 | 76.28% | 148.73<br>73 | 516 | 77.17% | 143.3<br>479 | Gpx4              |
| 19822                           | 2936  | 536 | 94.21% | 51.267<br>77 | 445 | 94.99% | 42.61<br>143 | Rnf4              |
| 16978                           | 3662  | 536 | 92.76% | 41.103<br>82 | 389 | 89.90% | 29.86<br>437 | Lrrfip1           |
| 76448                           | 3185  | 536 | 96.20% | 47.259<br>71 | 464 | 98.12% | 40.95<br>724 | Ppp1r18           |
| 20448                           | 4406  | 536 | 88.04% | 34.163       | 476 | 85.66% | 30.37<br>278 | St6galna<br>c4    |
| 78781                           | 3784  | 535 | 83.17% | 39.704<br>38 | 370 | 79.52% | 27.48<br>987 | Zc3hav1           |
| 229227                          | 15883 | 535 | 62.43% | 9.4592<br>55 | 368 | 42.04% | 6.513<br>845 | 4932438<br>A13Rik |
| gi 298676458 ref NM_001190401.1 | 12122 | 534 | 67.98% | 12.370<br>94 | 364 | 57.08% | 8.442<br>075 | -                 |
| 338366                          | 6933  | 534 | 74.93% | 21.629<br>96 | 438 | 68.50% | 17.76<br>131 | Mia3              |
| 27981                           | 1415  | 534 | 98.30% | 105.97<br>92 | 438 | 96.54% | 87.02<br>415 | D4Wsu5<br>3e      |

|                                  |       |     |        |              |     |        |              |                   |
|----------------------------------|-------|-----|--------|--------------|-----|--------|--------------|-------------------|
| 106878                           | 2008  | 534 | 85.71% | 74.681<br>54 | 882 | 91.24% | 123.4<br>886 | 2010002<br>N04Rik |
| 56878                            | 2688  | 534 | 84.71% | 55.788<br>89 | 624 | 80.69% | 65.26<br>456 | Rbms1             |
| 226517                           | 5867  | 533 | 89.36% | 25.512<br>14 | 409 | 85.92% | 19.59<br>879 | Smg7              |
| 224020                           | 6449  | 532 | 90.77% | 23.166<br>21 | 329 | 76%    | 14.34<br>253 | Pi4ka             |
| 15980                            | 2070  | 532 | 92.61% | 72.173<br>37 | 464 | 95.65% | 63.01<br>875 | Ifngr2            |
| 329739                           | 5702  | 532 | 87.76% | 26.201<br>14 | 381 | 78.46% | 18.78<br>538 | Fam102b           |
| 56324                            | 4124  | 532 | 84.99% | 36.226<br>69 | 482 | 89.28% | 32.85<br>871 | Stam2             |
| gi 60218873 ref N<br>M_008576.2  | 5944  | 531 | 90.98% | 25.087<br>16 | 377 | 82.39% | 17.83<br>137 | -                 |
| 98999                            | 7233  | 531 | 88.94% | 20.616<br>35 | 330 | 72.11% | 12.82<br>678 | Znfx1             |
| 100019                           | 17959 | 530 | 53.01% | 8.2876<br>12 | 301 | 28.28% | 4.712<br>013 | Mdn1              |
| 12045                            | 764   | 530 | 58.38% | 194.81<br>31 | 896 | 64.66% | 329.7<br>135 | Bcl2a1b           |
| 22388                            | 2878  | 529 | 98.61% | 51.617<br>93 | 476 | 98.92% | 46.49<br>843 | Wdr1              |
| gi 31981043 ref N<br>M_019729.2  | 4138  | 529 | 95.09% | 35.900<br>53 | 415 | 87.72% | 28.19<br>55  | -                 |
| 12537                            | 2589  | 529 | 98.92% | 57.379<br>84 | 543 | 95.60% | 58.96<br>44  | Cdk11b            |
| 76088                            | 7810  | 527 | 84.15% | 18.949<br>39 | 566 | 86.04% | 20.37<br>453 | Dock8             |
| 50926                            | 2761  | 527 | 85.44% | 53.601<br>87 | 527 | 84.75% | 53.66<br>193 | Hnrpd1            |
| 22034                            | 5536  | 527 | 90.73% | 26.733<br>16 | 347 | 80.04% | 17.62<br>201 | Traf6             |
| 12846                            | 2185  | 527 | 77.48% | 67.732<br>15 | 841 | 76.16% | 108.2<br>098 | Comt              |
| 20683                            | 7818  | 527 | 88.68% | 18.93        | 314 | 74.15% | 11.29<br>162 | Sp1               |
| 22334                            | 1662  | 527 | 94.71% | 89.046<br>18 | 557 | 92.12% | 94.22<br>069 | Vdac2             |
| gi 146141133 ref N<br>M_024225.4 | 2375  | 526 | 76.80% | 62.195<br>34 | 458 | 74.02% | 54.21<br>556 | -                 |
| 192654                           | 2721  | 526 | 98.86% | 54.286<br>63 | 366 | 98.02% | 37.81<br>592 | Pla2g15           |

|        |      |     |        |              |     |        |              |               |
|--------|------|-----|--------|--------------|-----|--------|--------------|---------------|
| 12492  | 2110 | 526 | 88.44% | 70.006<br>6  | 632 | 92.04% | 84.20<br>866 | Scarb2        |
| 232798 | 5094 | 525 | 93.25% | 28.942<br>5  | 433 | 87.02% | 23.89<br>742 | Leng8         |
| 56312  | 639  | 525 | 97.65% | 230.72<br>47 | 740 | 97.65% | 325.5<br>764 | Nupr1         |
| 22344  | 4521 | 525 | 90.27% | 32.610<br>73 | 423 | 91.06% | 26.30<br>437 | Vezf1         |
| 71833  | 5765 | 525 | 91.80% | 25.573<br>83 | 386 | 80.33% | 18.82<br>392 | Dcaf7         |
| 68018  | 5363 | 525 | 89.99% | 27.490<br>79 | 359 | 74.40% | 18.81<br>953 | Col4a3b<br>p  |
| 233410 | 7292 | 525 | 88.04% | 20.218<br>47 | 412 | 80.99% | 15.88<br>447 | Zfp592        |
| 59024  | 8464 | 525 | 73.77% | 17.418<br>85 | 400 | 66.04% | 13.28<br>637 | Med12         |
| 211347 | 7365 | 524 | 85.27% | 19.979<br>94 | 381 | 80.03% | 14.54<br>368 | Pank3         |
| 72318  | 2791 | 524 | 95.13% | 52.723<br>86 | 455 | 94.52% | 45.83<br>251 | Cyth4         |
| 94112  | 3383 | 524 | 95.71% | 43.497<br>57 | 404 | 89.09% | 33.57<br>388 | Med15         |
| 338523 | 9553 | 523 | 78.43% | 15.374<br>38 | 681 | 79.23% | 20.04<br>146 | Jhdm1d        |
| 21454  | 2363 | 523 | 75.37% | 62.154<br>66 | 567 | 77.57% | 67.45<br>924 | Tcp1          |
| 17988  | 2909 | 523 | 97.25% | 50.488<br>64 | 354 | 95.94% | 34.21<br>225 | Ndrgl         |
| 217262 | 6268 | 523 | 94.43% | 23.431<br>95 | 526 | 90.03% | 23.59<br>277 | Abca9         |
| 20619  | 2223 | 521 | 96.58% | 65.816<br>38 | 366 | 92.58% | 46.28<br>75  | Snap23        |
| 20908  | 3269 | 521 | 89.94% | 44.756<br>75 | 558 | 88.47% | 47.98<br>897 | Stx3          |
| 50934  | 4064 | 521 | 96.51% | 36.001<br>43 | 489 | 92.27% | 33.82<br>807 | Slc7a8        |
| 54208  | 2154 | 521 | 95.68% | 67.924<br>7  | 512 | 96.01% | 66.82<br>614 | Arl6ip1       |
| 73945  | 7324 | 521 | 86.80% | 19.976<br>76 | 350 | 77.61% | 13.43<br>513 | Otud4         |
| 224647 | 3818 | 520 | 91.49% | 38.247<br>51 | 443 | 91.75% | 32.62<br>045 | D17Wsu<br>92e |
| 18813  | 2432 | 520 | 95.72% | 60.044<br>81 | 451 | 97.66% | 52.13<br>569 | Pa2g4         |

|        |      |     |        |              |     |        |              |          |
|--------|------|-----|--------|--------------|-----|--------|--------------|----------|
| 70351  | 3864 | 520 | 94.36% | 37.792<br>18 | 496 | 94.23% | 36.08<br>832 | Ppp4r1   |
| 20481  | 5481 | 518 | 90.80% | 26.540<br>29 | 492 | 84.31% | 25.23<br>64  | Ski      |
| 53817  | 1756 | 518 | 68.62% | 82.840<br>17 | 483 | 68.96% | 77.32<br>942 | Ddx39b   |
| 16150  | 4540 | 518 | 86.15% | 32.041<br>26 | 413 | 85.53% | 25.57<br>504 | Ikbkb    |
| 233833 | 8493 | 516 | 82.50% | 17.061<br>78 | 350 | 72.71% | 11.58<br>588 | Tnrc6a   |
| 84095  | 3771 | 516 | 63.03% | 38.426<br>33 | 472 | 62.48% | 35.18<br>905 | Pi4k2a   |
| 319322 | 3249 | 515 | 93.91% | 44.513<br>65 | 453 | 95.08% | 39.19<br>86  | Sf3b2    |
| 329693 | 2657 | 515 | 62.29% | 54.431<br>64 | 347 | 57.70% | 36.71<br>64  | Fcrl5    |
| 22145  | 2053 | 514 | 70.48% | 70.308<br>83 | 626 | 69.75% | 85.72<br>5   | Tuba4a   |
| 54598  | 4761 | 514 | 93.32% | 30.318<br>01 | 400 | 89.41% | 23.62<br>022 | Calcr1   |
| 53331  | 2500 | 514 | 90.68% | 57.737<br>61 | 559 | 87.72% | 62.86<br>283 | Stx7     |
| 26941  | 1922 | 513 | 96.15% | 74.954<br>84 | 486 | 97.92% | 71.08<br>943 | Slc9a3r1 |
| 234407 | 3189 | 513 | 90.25% | 45.175<br>04 | 497 | 91.19% | 43.81<br>512 | Git25d1  |
| 52036  | 4979 | 513 | 95.58% | 28.934<br>16 | 378 | 85.66% | 21.34<br>38  | Ppp6r3   |
| 20384  | 1662 | 512 | 58.78% | 86.511<br>66 | 507 | 66.19% | 85.76<br>282 | Srsf5    |
| 71750  | 4270 | 512 | 83.37% | 33.672<br>69 | 479 | 82.83% | 31.53<br>768 | R3hdm2   |
| 20905  | 2283 | 512 | 79.11% | 62.979<br>58 | 627 | 78.32% | 77.21<br>181 | Sts      |
| 192656 | 1923 | 512 | 97.76% | 74.769<br>83 | 649 | 97.87% | 94.88<br>281 | Ripk2    |
| 223691 | 1893 | 511 | 98.57% | 75.806<br>42 | 479 | 98.73% | 71.13<br>888 | Eif3l    |
| 330192 | 2512 | 511 | 96.50% | 57.126<br>42 | 595 | 95.22% | 66.59<br>16  | Vps37b   |
| 232157 | 1562 | 509 | 98.34% | 91.510<br>82 | 294 | 96.73% | 52.91<br>617 | Mob1a    |
| 20973  | 1524 | 509 | 98.29% | 93.792<br>59 | 420 | 96.98% | 77.47<br>943 | Syngn2   |

|                             |       |     |        |              |     |        |              |         |
|-----------------------------|-------|-----|--------|--------------|-----|--------|--------------|---------|
| 11689                       | 2827  | 509 | 97.81% | 50.562<br>4  | 684 | 97.35% | 68.02<br>247 | Alox5   |
| 15015                       | 1793  | 509 | 90.35% | 79.721<br>09 | 555 | 92.92% | 87.02<br>315 | H2-Q4   |
| 76893                       | 2048  | 509 | 93.70% | 69.794<br>88 | 442 | 92.14% | 60.67<br>565 | Lass2   |
| 71766                       | 3465  | 508 | 98.61% | 41.171<br>45 | 465 | 96.22% | 37.72<br>87  | Raver1  |
| 21351                       | 1276  | 508 | 93.65% | 111.80<br>18 | 604 | 93.50% | 133.0<br>786 | Taldo1  |
| 68059                       | 3062  | 508 | 95.46% | 46.590<br>16 | 467 | 93.04% | 42.87<br>793 | Tm9sf2  |
| 56421                       | 3986  | 507 | 72.63% | 35.719<br>58 | 470 | 72.45% | 33.14<br>993 | Pfkip   |
| 1E+08                       | 1930  | 507 | 79.74% | 73.771<br>12 | 562 | 78.29% | 81.86<br>554 | Mndal   |
| 110208                      | 2224  | 507 | 98.47% | 64.019       | 485 | 96.36% | 61.30<br>968 | Pgd     |
| 12453                       | 2830  | 506 | 73.36% | 50.211<br>11 | 390 | 71.41% | 38.74<br>363 | Ccni    |
| 26900                       | 4640  | 506 | 95.78% | 30.624<br>45 | 504 | 94.89% | 30.53<br>758 | Ddx3y   |
| 16549                       | 4001  | 506 | 92.88% | 35.515<br>48 | 430 | 86.30% | 30.21<br>496 | Khsrp   |
| gi 33468896 ref NM_010295.1 | 2314  | 506 | 98.92% | 61.407<br>71 | 389 | 98.01% | 47.26<br>159 | -       |
| 23881                       | 4331  | 506 | 91.20% | 32.809<br>38 | 423 | 86.05% | 27.45<br>834 | G3bp2   |
| 94246                       | 6105  | 505 | 86.06% | 23.229<br>58 | 380 | 82.60% | 17.49<br>927 | Arid4b  |
| 20843                       | 5955  | 505 | 84.84% | 23.814<br>71 | 437 | 86.58% | 20.63<br>107 | Stag2   |
| 76795                       | 5225  | 505 | 90.83% | 27.141<br>93 | 442 | 86.87% | 23.78<br>253 | Tbc1d9b |
| 17101                       | 11806 | 505 | 75.57% | 12.012<br>25 | 213 | 46.39% | 5.072<br>23  | Lyst    |
| 14873                       | 1163  | 504 | 96.82% | 121.69<br>89 | 535 | 95.61% | 129.3<br>291 | Gsto1   |
| 57257                       | 5023  | 504 | 87.02% | 28.177<br>54 | 350 | 83.87% | 19.58<br>966 | Vav3    |
| 241075                      | 8562  | 504 | 82.20% | 16.530<br>69 | 396 | 73.27% | 13.00<br>296 | Plekhm3 |
| 104570                      | 5111  | 504 | 86.85% | 27.692<br>39 | 381 | 83.72% | 20.95<br>758 | Smek2   |



|                                  |      |     |        |              |      |        |              |               |
|----------------------------------|------|-----|--------|--------------|------|--------|--------------|---------------|
| 214854                           | 2583 | 504 | 99.77% | 54.795<br>11 | 647  | 96.94% | 70.42<br>097 | Neur13        |
| 21926                            | 1619 | 503 | 96.05% | 87.248<br>27 | 3592 | 98.83% | 623.7<br>515 | Tnf           |
| 11853                            | 1082 | 503 | 96.67% | 130.54<br>99 | 667  | 97.13% | 173.3<br>088 | Rhoc          |
| 16179                            | 3955 | 502 | 89.66% | 35.644<br>53 | 510  | 88.29% | 36.25<br>315 | Irak1         |
| 12464                            | 1966 | 502 | 92.42% | 71.706<br>07 | 470  | 94.56% | 67.21<br>04  | Cct4          |
| 76080                            | 4551 | 501 | 94.31% | 30.914<br>81 | 411  | 90.07% | 25.38<br>967 | Ttpal         |
| 56743                            | 1523 | 501 | 97.64% | 92.379<br>06 | 585  | 97.37% | 107.9<br>886 | Lat2          |
| 230674                           | 4616 | 501 | 91.53% | 30.479<br>49 | 404  | 77.99% | 24.60<br>581 | Kdm4a         |
| 230598                           | 4155 | 501 | 81.85% | 33.861<br>2  | 443  | 77.35% | 29.97<br>47  | Nrd1          |
| 68581                            | 3526 | 501 | 77.20% | 39.901<br>68 | 474  | 78.22% | 37.79<br>359 | Tmed10        |
| 72587                            | 4628 | 500 | 84.62% | 30.339<br>78 | 412  | 79.73% | 25.02<br>799 | Pan3          |
| 15900                            | 2829 | 500 | 98.87% | 49.633<br>26 | 401  | 94.91% | 39.85<br>048 | Irf8          |
| 65960                            | 4071 | 500 | 92.75% | 34.490<br>91 | 338  | 85.34% | 23.34<br>198 | Twsg1         |
| 60599                            | 5392 | 499 | 85.68% | 25.988<br>81 | 322  | 72.44% | 16.78<br>913 | Trp53inp<br>1 |
| 56209                            | 1529 | 499 | 93.85% | 91.649<br>22 | 562  | 95.88% | 103.3<br>358 | Gde1          |
| 14066                            | 1876 | 499 | 92.96% | 74.697<br>04 | 1705 | 94.72% | 255.5<br>134 | F3            |
| gi 77539453 ref N<br>M_016920.2  | 4000 | 499 | 94.43% | 35.032<br>91 | 344  | 89.42% | 24.17<br>801 | -             |
| 13849                            | 1708 | 498 | 96.37% | 81.879<br>88 | 619  | 99.88% | 101.8<br>884 | Ephx1         |
| gi 110626030 ref N<br>M_011317.3 | 2684 | 498 | 95.60% | 52.105<br>38 | 451  | 93.26% | 47.24<br>068 | -             |
| 75826                            | 4566 | 498 | 83.29% | 30.628<br>74 | 403  | 87.76% | 24.81<br>368 | Senp2         |
| 16800                            | 4300 | 497 | 94.77% | 32.458<br>14 | 398  | 90.77% | 26.02<br>176 | Arhgef2       |
| 19878                            | 8012 | 496 | 81.64% | 17.385<br>07 | 442  | 73.89% | 15.50<br>97  | Rock2         |

|                                  |       |     |        |              |     |        |              |               |
|----------------------------------|-------|-----|--------|--------------|-----|--------|--------------|---------------|
| 83436                            | 4992  | 496 | 93.11% | 27.902<br>48 | 354 | 89.02% | 19.93<br>659 | Plekha2       |
| gi 270483853 ref N<br>M_021406.4 | 3005  | 495 | 98.54% | 46.259<br>02 | 663 | 98.90% | 62.02<br>848 | -             |
| 20224                            | 2602  | 495 | 97.66% | 53.423<br>66 | 514 | 94.89% | 55.53<br>643 | Sar1a         |
| gi 118130121 ref N<br>M_011552.2 | 4013  | 493 | 95.64% | 34.499<br>55 | 366 | 87.14% | 25.64<br>095 | -             |
| gi 145587670 ref N<br>M_019825.2 | 6881  | 493 | 91.27% | 20.120<br>14 | 289 | 72.45% | 11.80<br>778 | -             |
| 74126                            | 3470  | 492 | 88.99% | 39.817<br>26 | 369 | 87.72% | 29.89<br>641 | Syvn1         |
| 18648                            | 1855  | 491 | 88.84% | 74.331<br>57 | 420 | 92.29% | 63.65<br>426 | Pgam1         |
| 12388                            | 5475  | 491 | 89.10% | 25.184<br>49 | 496 | 78.26% | 25.46<br>946 | Ctnnd1        |
| 19058                            | 2829  | 491 | 93.71% | 48.739<br>86 | 454 | 92.22% | 45.11<br>75  | Ppp3r1        |
| 107746                           | 6251  | 489 | 81.79% | 21.968<br>23 | 351 | 68.25% | 15.78<br>628 | Rapgef1       |
| 268373                           | 736   | 489 | 48.10% | 186.58<br>07 | 491 | 48.10% | 187.5<br>538 | Ppia          |
| 18442                            | 3000  | 489 | 98.13% | 45.774<br>47 | 627 | 97.03% | 58.75<br>819 | P2ry2         |
| 105522                           | 5229  | 489 | 92.68% | 26.261<br>89 | 236 | 77.53% | 12.68<br>865 | Ankrd28       |
| 19108                            | 3217  | 489 | 96.61% | 42.686<br>79 | 512 | 95.49% | 44.74<br>464 | Prkx          |
| 224860                           | 4068  | 489 | 94.25% | 33.756<br>98 | 537 | 95.43% | 37.11<br>209 | Plcl2         |
| 71148                            | 4758  | 489 | 92.85% | 28.861<br>58 | 376 | 87.33% | 22.21<br>701 | Mier1         |
| 215690                           | 12767 | 488 | 74.58% | 10.734<br>13 | 510 | 72.36% | 11.23<br>061 | Nav1          |
| 53379                            | 4086  | 488 | 57.73% | 33.539<br>55 | 524 | 54.77% | 36.05<br>413 | Hnrnpa2<br>b1 |
| 68734                            | 4594  | 487 | 90.47% | 29.769<br>65 | 379 | 78.47% | 23.19<br>372 | Smek1         |
| 12774                            | 2926  | 487 | 95.49% | 46.740<br>18 | 387 | 94.74% | 37.18<br>423 | Ccr5          |
| 67338                            | 3650  | 487 | 82.85% | 37.468<br>97 | 520 | 83.04% | 40.05<br>277 | Rffl          |
| 381626                           | 9501  | 487 | 78.83% | 14.394<br>46 | 345 | 70.71% | 10.20<br>873 | Rbm33         |

|                              |       |     |        |              |     |        |              |                   |
|------------------------------|-------|-----|--------|--------------|-----|--------|--------------|-------------------|
| 70349                        | 3315  | 486 | 96.71% | 41.170<br>72 | 410 | 90.95% | 34.77<br>142 | Copb1             |
| 233033                       | 4391  | 486 | 96.13% | 31.081<br>97 | 418 | 90.98% | 26.76<br>301 | Samd4b            |
| 14469                        | 2471  | 485 | 98.66% | 55.119<br>43 | 547 | 98.70% | 62.23<br>529 | Gbp2              |
| 20867                        | 2173  | 483 | 93.83% | 62.419<br>91 | 566 | 96.82% | 73.22<br>828 | Stip1             |
| 13002                        | 3674  | 483 | 95.21% | 36.918<br>47 | 341 | 92.27% | 26.09<br>38  | Dnajc5            |
| 218811                       | 4446  | 482 | 96.60% | 30.444<br>81 | 343 | 86.10% | 21.68<br>936 | Sec24c            |
| gi 146134334 ref NM_013771.4 | 3906  | 482 | 84.28% | 34.653<br>77 | 448 | 87.61% | 32.24<br>541 | -                 |
| 235439                       | 15229 | 481 | 61.26% | 8.8697<br>1  | 279 | 41.69% | 5.150<br>566 | Herc1             |
| 17342                        | 4890  | 481 | 89.53% | 27.623<br>07 | 658 | 90.70% | 37.83<br>024 | Mitf              |
| 68094                        | 4964  | 481 | 92.26% | 27.211<br>28 | 418 | 90.55% | 23.67<br>373 | Smarcc2           |
| 12700                        | 2161  | 481 | 96.90% | 62.506<br>62 | 735 | 97.04% | 95.62<br>131 | Cish              |
| 223693                       | 3388  | 481 | 95.45% | 39.869<br>19 | 462 | 94.75% | 38.33<br>723 | Tmem18<br>4b      |
| 81703                        | 1662  | 480 | 90.19% | 81.104<br>68 | 609 | 91.34% | 103.0<br>169 | Jdp2              |
| 109905                       | 1424  | 480 | 94.10% | 94.660<br>1  | 403 | 93.47% | 79.56<br>41  | Rap1a             |
| 20655                        | 661   | 480 | 89.71% | 203.92<br>74 | 454 | 88.80% | 193.0<br>974 | Sod1              |
| 19684                        | 4580  | 479 | 87.86% | 29.370<br>12 | 372 | 84.02% | 22.83<br>492 | Rdx               |
| 74919                        | 3082  | 479 | 97.34% | 43.645<br>41 | 524 | 96.76% | 47.79<br>922 | 4930471<br>M23Rik |
| gi 146149304 ref NM_144948.4 | 1773  | 479 | 95.43% | 75.868<br>67 | 614 | 98.98% | 97.36<br>027 | -                 |
| 72692                        | 3116  | 479 | 87.93% | 43.169<br>18 | 284 | 86.71% | 25.62<br>377 | Hnrp1l            |
| 22059                        | 1877  | 478 | 96.27% | 71.515<br>36 | 400 | 91.80% | 59.91<br>255 | Trp53             |
| 100683                       | 12476 | 478 | 71.12% | 10.759<br>4  | 273 | 48.55% | 6.151<br>902 | Trrap             |
| 20698                        | 1880  | 478 | 97.50% | 71.401<br>24 | 579 | 95.80% | 86.58<br>503 | Sphk1             |

|                                  |       |     |        |              |     |        |              |                   |
|----------------------------------|-------|-----|--------|--------------|-----|--------|--------------|-------------------|
| 666173                           | 13380 | 477 | 69.19% | 10.011<br>47 | 433 | 56.78% | 9.098<br>167 | Vps13b            |
| 74493                            | 6503  | 477 | 86.25% | 20.598<br>72 | 333 | 74.24% | 14.39<br>636 | Tnks2             |
| 73205                            | 3198  | 477 | 96.59% | 41.886<br>65 | 660 | 94.47% | 58.02<br>132 | 3110043<br>O21Rik |
| 208292                           | 10857 | 476 | 73.15% | 12.312<br>12 | 254 | 49.07% | 6.577<br>275 | Zfp871            |
| 18195                            | 3766  | 476 | 95.62% | 35.494<br>6  | 359 | 94.34% | 26.80<br>009 | Nsf               |
| 93836                            | 4880  | 476 | 92.60% | 27.391<br>94 | 355 | 85.04% | 20.45<br>176 | Rnf111            |
| 320940                           | 6070  | 476 | 91.53% | 22.021<br>86 | 392 | 80.25% | 18.15<br>597 | Atp11c            |
| gi 46560562 ref N<br>M_011365.2  | 6001  | 475 | 92.82% | 22.228<br>27 | 330 | 83.97% | 15.46<br>01  | -                 |
| 77407                            | 2181  | 475 | 91.56% | 61.160<br>87 | 434 | 90.28% | 55.94<br>434 | Rab35             |
| gi 126352390 ref N<br>M_175557.4 | 3061  | 475 | 95.07% | 43.577<br>87 | 410 | 95.43% | 37.65<br>673 | -                 |
| 223455                           | 6236  | 474 | 88.79% | 21.345<br>58 | 347 | 84.77% | 15.64<br>392 | 6-Mar             |
| 20823                            | 2088  | 474 | 90.61% | 63.750<br>49 | 482 | 88.84% | 64.89<br>91  | Ssb               |
| 12988                            | 2292  | 473 | 97.82% | 57.953<br>84 | 342 | 97.86% | 41.95<br>016 | Csk               |
| 209446                           | 3293  | 473 | 87.94% | 40.337<br>14 | 446 | 90.77% | 38.07<br>722 | Tfe3              |
| 70611                            | 3446  | 473 | 93.18% | 38.546<br>2  | 643 | 92.05% | 52.45<br>874 | Fbxo33            |
| 11750                            | 2965  | 472 | 89.78% | 44.704<br>68 | 532 | 83.04% | 50.44<br>395 | Anxa7             |
| 78339                            | 4677  | 472 | 92.97% | 28.340<br>68 | 440 | 86.02% | 26.44<br>889 | Ttyh3             |
| 212307                           | 4044  | 472 | 82.44% | 32.776<br>8  | 412 | 82.54% | 28.64<br>232 | Mapre2            |
| 22195                            | 2609  | 472 | 74.55% | 50.804<br>67 | 453 | 74.20% | 48.81<br>421 | Ube213            |
| 70827                            | 6286  | 471 | 86.13% | 21.041<br>77 | 374 | 81.51% | 16.72<br>705 | Trak2             |
| 71772                            | 3595  | 471 | 93.88% | 36.792<br>37 | 466 | 95.52% | 36.44<br>258 | Plbd2             |
| 214133                           | 9199  | 470 | 77.49% | 14.348<br>05 | 276 | 56.92% | 8.435<br>107 | Tet2              |

|                              |      |     |        |              |     |        |              |               |
|------------------------------|------|-----|--------|--------------|-----|--------|--------------|---------------|
| 68728                        | 3934 | 470 | 96.54% | 33.550<br>52 | 384 | 91%    | 27.44<br>22  | Trp53inp<br>2 |
| 17931                        | 3403 | 470 | 95.83% | 38.785<br>7  | 477 | 94.53% | 39.40<br>747 | Ppp1r12<br>a  |
| 54130                        | 2742 | 470 | 99.67% | 48.135<br>57 | 389 | 98.54% | 39.88<br>451 | Actr1a        |
| 109754                       | 2066 | 470 | 96.13% | 63.885<br>64 | 564 | 96.61% | 76.74<br>868 | Cyb5r3        |
| 67115                        | 935  | 469 | 43.64% | 140.86<br>3  | 572 | 48.34% | 171.9<br>913 | Rpl14         |
| 50523                        | 5213 | 469 | 93.50% | 25.265<br>09 | 345 | 82.66% | 18.60<br>602 | Lats2         |
| gi 118130049 ref NM_144843.3 | 3813 | 469 | 94.41% | 34.541<br>54 | 335 | 90.82% | 24.70<br>018 | -             |
| 74392                        | 6307 | 469 | 81.54% | 20.882<br>66 | 415 | 74.98% | 18.49<br>896 | Specc11       |
| 228136                       | 4740 | 469 | 90.80% | 27.786<br>27 | 443 | 88.19% | 26.27<br>529 | Zdhhc5        |
| 66102                        | 2448 | 468 | 80.27% | 53.687<br>13 | 566 | 82.07% | 65.00<br>206 | Cxcl16        |
| 14282                        | 3783 | 468 | 92.39% | 34.741<br>23 | 617 | 94.18% | 45.85<br>334 | Fosb          |
| 140740                       | 6058 | 468 | 81.84% | 21.694<br>63 | 418 | 76.05% | 19.39<br>854 | Sec63         |
| 75410                        | 8457 | 468 | 80.86% | 15.540<br>51 | 277 | 59.06% | 9.208<br>429 | Wbp7          |
| 217124                       | 4345 | 467 | 82.74% | 30.183<br>03 | 546 | 81.29% | 35.32<br>848 | Ppp1r9b       |
| 17448                        | 1297 | 467 | 96.53% | 101.11<br>43 | 489 | 96.92% | 105.9<br>964 | Mdh2          |
| 101214                       | 1839 | 467 | 92.17% | 71.313<br>35 | 586 | 94.18% | 89.58<br>556 | Tra2a         |
| 64095                        | 4233 | 467 | 91.07% | 30.981<br>63 | 559 | 92.16% | 37.12<br>664 | Gpr35         |
| 19204                        | 1820 | 466 | 97.80% | 71.903<br>53 | 597 | 99.07% | 92.21<br>999 | Ptafr         |
| 15463                        | 3137 | 466 | 86.93% | 41.716<br>43 | 384 | 85.85% | 34.41<br>429 | Agfg1         |
| 83679                        | 8420 | 466 | 28.48% | 15.542<br>09 | 303 | 27.16% | 10.11<br>702 | Pde4dip       |
| gi 119226234 ref NM_011424.2 | 8906 | 466 | 81.25% | 14.693<br>96 | 304 | 67.04% | 9.596<br>503 | -             |
| 59090                        | 3708 | 465 | 89.21% | 35.216<br>72 | 610 | 97.33% | 46.25<br>005 | Midn          |

|                                     |       |     |        |              |     |        |              |                   |
|-------------------------------------|-------|-----|--------|--------------|-----|--------|--------------|-------------------|
| 53625                               | 2699  | 465 | 87.85% | 48.382<br>22 | 492 | 91.14% | 51.24<br>887 | B3gnt2            |
| 56194                               | 3565  | 465 | 96.19% | 36.629<br>34 | 409 | 94.50% | 32.25<br>417 | Prpf40a           |
| gi 149241210 ref X<br>M_001001408.2 | 7174  | 464 | 75.65% | 18.163<br>2  | 290 | 64.61% | 11.36<br>472 | -                 |
| 19303                               | 3781  | 464 | 92.65% | 34.462<br>52 | 603 | 94.45% | 44.83<br>661 | Pxn               |
| 77371                               | 6798  | 464 | 84.41% | 19.167<br>81 | 462 | 83.38% | 19.10<br>658 | Sec24a            |
| 54604                               | 12139 | 464 | 66.34% | 10.734<br>23 | 309 | 57.29% | 7.156<br>451 | Pcnx              |
| 54214                               | 7532  | 463 | 85.32% | 17.262<br>61 | 417 | 81.17% | 15.56<br>495 | Golga4            |
| 66680                               | 1583  | 463 | 91.28% | 82.136<br>42 | 532 | 91.85% | 94.48<br>282 | 3230401<br>D17Rik |
| gi 149269210 ref X<br>M_903697.3    | 2110  | 463 | 45.73% | 61.621<br>78 | 504 | 45.45% | 67.15<br>374 | -                 |
| 170737                              | 5562  | 462 | 77.17% | 23.326<br>35 | 436 | 68.77% | 22.03<br>828 | Znrf1             |
| 12468                               | 2452  | 462 | 76.79% | 52.912<br>37 | 460 | 75.37% | 52.74<br>235 | Cct7              |
| 68942                               | 1838  | 462 | 99.18% | 70.588<br>21 | 437 | 96.08% | 66.84<br>333 | Chmp2b            |
| 22029                               | 2325  | 461 | 91.40% | 55.681<br>85 | 399 | 84.56% | 48.24<br>719 | Traf1             |
| 11774                               | 4020  | 461 | 91.32% | 32.204<br>06 | 414 | 89.65% | 28.95<br>319 | Ap3b1             |
| 29864                               | 2132  | 461 | 96.53% | 60.722<br>47 | 368 | 92.03% | 48.52<br>692 | Rnf11             |
| gi 160333202 ref N<br>M_008633.3    | 5681  | 461 | 89.79% | 22.788<br>3  | 298 | 83.33% | 14.74<br>734 | -                 |
| 233315                              | 5205  | 460 | 93.20% | 24.818<br>34 | 399 | 87.44% | 21.55<br>134 | Mtmr10            |
| 14381                               | 2639  | 460 | 84.43% | 48.950<br>16 | 471 | 84.08% | 50.17<br>688 | G6pdx             |
| 16790                               | 3439  | 460 | 95.61% | 37.563<br>09 | 438 | 96.28% | 35.80<br>668 | Anpep             |
| 19035                               | 979   | 460 | 54.85% | 131.95<br>04 | 578 | 53.93% | 165.9<br>844 | Ppib              |
| 17973                               | 1699  | 460 | 87.76% | 76.032<br>66 | 412 | 84.52% | 68.17<br>513 | Nck1              |
| 23833                               | 531   | 460 | 90.58% | 243.27<br>59 | 440 | 90.40% | 232.9<br>594 | Cd52              |

|        |       |     |        |              |     |        |              |          |
|--------|-------|-----|--------|--------------|-----|--------|--------------|----------|
| 18114  | 2008  | 459 | 95.07% | 64.192<br>56 | 440 | 94.82% | 61.60<br>431 | Rrp1     |
| 66481  | 396   | 459 | 75.51% | 325.50<br>17 | 568 | 77.02% | 403.2<br>508 | Rps21    |
| 80750  | 6469  | 459 | 84.76% | 19.925<br>59 | 409 | 80.45% | 17.77<br>495 | N4bp1    |
| 208449 | 4056  | 459 | 75.30% | 31.779<br>75 | 713 | 78.60% | 49.42<br>125 | Sgms1    |
| 14884  | 2749  | 459 | 85.52% | 46.889<br>29 | 413 | 84.29% | 42.23<br>742 | Gtf2h1   |
| 11842  | 3481  | 458 | 97.21% | 36.948<br>53 | 382 | 95.09% | 30.85<br>187 | Arf3     |
| 99237  | 3895  | 458 | 96.56% | 33.021<br>27 | 439 | 94.56% | 31.68<br>686 | Tm9sf4   |
| 56228  | 3522  | 458 | 92.99% | 36.518<br>41 | 399 | 92.70% | 31.84<br>972 | Ube2j1   |
| 414872 | 10654 | 458 | 76.27% | 12.072<br>26 | 292 | 60.75% | 7.705<br>348 | Zyg11b   |
| 14104  | 9938  | 457 | 72.91% | 12.913<br>77 | 276 | 55.56% | 7.807<br>863 | Fasn     |
| 20409  | 1714  | 457 | 78.65% | 74.875<br>73 | 410 | 81.39% | 67.25<br>044 | Ostf1    |
| 13685  | 981   | 457 | 91.13% | 130.82<br>26 | 392 | 89.40% | 112.3<br>412 | Eif4ebp1 |
| 29810  | 2607  | 457 | 92.14% | 49.227<br>85 | 733 | 98.20% | 79.04<br>694 | Bag3     |
| 67213  | 3352  | 456 | 93.74% | 38.202<br>92 | 367 | 91.38% | 30.78<br>11  | Cmtm6    |
| 78749  | 3946  | 456 | 77.34% | 32.452<br>15 | 290 | 72.91% | 20.66<br>156 | Filip11  |
| 319817 | 8981  | 456 | 73.27% | 14.258<br>57 | 385 | 64.53% | 12.05<br>197 | Rc3h2    |
| 11430  | 4065  | 456 | 88.73% | 31.502<br>14 | 432 | 89.13% | 29.87<br>757 | Acox1    |
| 67615  | 3312  | 456 | 76.06% | 38.664<br>31 | 463 | 77.51% | 39.30<br>183 | Ube2r2   |
| 224742 | 3207  | 456 | 96.38% | 39.930<br>21 | 470 | 97.16% | 41.20<br>226 | Abcf1    |
| 266692 | 3542  | 455 | 89.44% | 36.074<br>35 | 301 | 85.71% | 23.89<br>132 | Cpne1    |
| 73826  | 3249  | 455 | 93.75% | 39.327<br>6  | 423 | 92.86% | 36.60<br>267 | Poldip3  |
| 109113 | 3595  | 455 | 94.49% | 35.542<br>52 | 351 | 85.51% | 27.44<br>924 | Uhrf2    |

|                              |       |     |        |              |     |        |              |         |
|------------------------------|-------|-----|--------|--------------|-----|--------|--------------|---------|
| 18708                        | 6915  | 454 | 81.34% | 18.437<br>39 | 372 | 77.70% | 15.12<br>422 | Pik3r1  |
| 22321                        | 4224  | 454 | 91.12% | 30.183<br>36 | 332 | 89.25% | 22.09<br>715 | Vars    |
| 56045                        | 4010  | 454 | 59.73% | 31.794<br>15 | 386 | 55.36% | 27.06<br>232 | Samhd1  |
| 12495                        | 4197  | 454 | 92.71% | 30.377<br>54 | 428 | 92.40% | 28.66<br>995 | Entpd1  |
| 16798                        | 7222  | 454 | 84.13% | 17.653<br>63 | 391 | 78.40% | 15.22<br>094 | Lats1   |
| 114715                       | 3042  | 453 | 92.08% | 41.819<br>1  | 434 | 89.91% | 40.11        | Spred1  |
| 14208                        | 2165  | 453 | 98.38% | 58.759<br>22 | 343 | 94.04% | 44.54<br>083 | Ppm1g   |
| 72193                        | 7724  | 453 | 80.68% | 16.469<br>93 | 288 | 65.43% | 10.48<br>268 | Scaf11  |
| 320404                       | 5101  | 453 | 90.04% | 24.938<br>97 | 407 | 90.41% | 22.43<br>165 | Itpkb   |
| gi 254939616 ref NM_021327.2 | 2852  | 453 | 94.88% | 44.605<br>09 | 688 | 93.06% | 67.82<br>051 | -       |
| gi 133892677 ref NM_053109.2 | 1206  | 453 | 48.09% | 105.48<br>4  | 670 | 62.19% | 156.1<br>887 | -       |
| 70093                        | 3081  | 453 | 88.48% | 41.289<br>75 | 412 | 84.75% | 37.59<br>479 | Ube2q1  |
| 68178                        | 6754  | 452 | 48.67% | 18.793<br>73 | 665 | 46.28% | 27.68<br>106 | Cgnl1   |
| 22632                        | 2324  | 452 | 95.35% | 54.618<br>28 | 334 | 87.78% | 40.40<br>475 | Yy1     |
| 239510                       | 6670  | 452 | 89.60% | 19.030<br>42 | 382 | 85.94% | 16.10<br>125 | Phf2011 |
| 64294                        | 2024  | 452 | 97.28% | 62.713<br>88 | 501 | 94.81% | 69.59<br>04  | Itm2c   |
| 193813                       | 2275  | 452 | 75.08% | 55.794<br>67 | 304 | 81.36% | 37.56<br>767 | Mcf2    |
| 110651                       | 2223  | 451 | 97.17% | 56.973<br>49 | 369 | 98.88% | 46.66<br>691 | Rps6ka3 |
| 227298                       | 2559  | 451 | 94.41% | 49.492<br>79 | 302 | 92.77% | 33.17<br>865 | Fam134a |
| 22589                        | 10244 | 451 | 75.42% | 12.363<br>54 | 350 | 64.95% | 9.605<br>514 | Atrx    |
| 21753                        | 2442  | 451 | 93.24% | 51.864<br>07 | 400 | 94.39% | 46.05<br>072 | Tes     |
| 16653                        | 4670  | 451 | 83.17% | 27.120<br>36 | 371 | 73.04% | 22.33<br>465 | Kras    |



|                                  |      |     |        |              |     |        |              |        |
|----------------------------------|------|-----|--------|--------------|-----|--------|--------------|--------|
| 108058                           | 4299 | 450 | 86.65% | 29.395<br>5  | 317 | 81.55% | 20.73<br>07  | Camk2d |
| 52830                            | 1907 | 450 | 95.49% | 66.267<br>03 | 448 | 97.59% | 66.04<br>644 | Pnrc2  |
| 26987                            | 3394 | 450 | 85.95% | 37.233<br>72 | 406 | 76.78% | 33.63<br>073 | Eif4e2 |
| 100715                           | 1873 | 450 | 91.03% | 67.469<br>96 | 381 | 94.45% | 57.18<br>858 | Papd4  |
| 217303                           | 4642 | 449 | 77.66% | 27.162<br>95 | 355 | 63.68% | 21.50<br>034 | Cd300a |
| 240396                           | 4080 | 449 | 78.82% | 30.904<br>51 | 436 | 81.27% | 30.04<br>336 | Mex3c  |
| 19192                            | 2620 | 449 | 95.19% | 48.126<br>11 | 401 | 93.40% | 43.02<br>939 | Psme3  |
| 71472                            | 4728 | 448 | 89.64% | 26.609<br>47 | 296 | 80.99% | 17.60<br>096 | Usp19  |
| 26398                            | 3694 | 447 | 94.23% | 33.981<br>8  | 480 | 96.43% | 36.53<br>141 | Map2k4 |
| 56457                            | 4147 | 447 | 70.65% | 30.269<br>78 | 401 | 75.89% | 27.18<br>52  | Clptm1 |
| 73192                            | 5989 | 447 | 54.87% | 20.959<br>89 | 349 | 53.11% | 16.38<br>299 | Xpot   |
| gi 62461607 ref N<br>M_145933.3  | 4529 | 447 | 87.33% | 27.716<br>66 | 283 | 75.60% | 17.56<br>735 | -      |
| 77305                            | 4313 | 447 | 85.23% | 29.104<br>74 | 333 | 82.59% | 21.70<br>635 | Wdr82  |
| 11538                            | 4903 | 447 | 91.17% | 25.602<br>44 | 384 | 85.97% | 22.01<br>869 | Adnp   |
| gi 146149145 ref N<br>M_018774.3 | 3829 | 446 | 62.91% | 32.710<br>35 | 430 | 65.60% | 31.57<br>223 | -      |
| 74302                            | 5691 | 446 | 91.55% | 22.008<br>07 | 308 | 83.13% | 15.21<br>543 | Mtmr3  |
| 56055                            | 2982 | 446 | 93.06% | 42.001<br>32 | 291 | 90.85% | 27.43<br>516 | Gtpbp2 |
| 75320                            | 6447 | 446 | 84.94% | 19.427<br>32 | 284 | 72.72% | 12.38<br>462 | Etnk1  |
| 26965                            | 3171 | 446 | 88.39% | 39.497<br>93 | 405 | 92.27% | 35.90<br>715 | Cul1   |
| 67887                            | 1914 | 446 | 96.03% | 65.437<br>79 | 406 | 94.62% | 59.63<br>569 | Tmem66 |
| 13382                            | 2258 | 445 | 92.74% | 55.344<br>16 | 346 | 93.80% | 43.07<br>986 | Did    |
| 56480                            | 3031 | 445 | 92.77% | 41.229<br>66 | 439 | 90.04% | 40.71<br>934 | Tbk1   |

|                                     |       |     |        |              |     |        |              |               |
|-------------------------------------|-------|-----|--------|--------------|-----|--------|--------------|---------------|
| gi 31981167 ref N<br>M_021473.2     | 1403  | 445 | 44.12% | 89.071<br>35 | 418 | 42.84% | 83.76<br>078 | -             |
| 223658                              | 5269  | 444 | 92.73% | 23.664<br>13 | 340 | 86.30% | 18.14<br>149 | Heatr7a       |
| 54650                               | 7837  | 442 | 84.32% | 15.838<br>28 | 358 | 80.50% | 12.84<br>267 | Sfmbt1        |
| 11798                               | 6550  | 442 | 81.19% | 18.950<br>33 | 346 | 70.96% | 14.85<br>104 | Xiap          |
| 56036                               | 2442  | 442 | 92.67% | 50.829<br>09 | 448 | 85.95% | 51.57<br>681 | Ccnl2         |
| 114664                              | 1699  | 442 | 94.06% | 73.057<br>47 | 410 | 94.11% | 67.84<br>418 | Hsd17b1<br>1  |
| 77480                               | 7402  | 441 | 77.82% | 16.731<br>13 | 337 | 72.97% | 12.79<br>979 | Kidins22<br>0 |
| 71458                               | 6959  | 441 | 79.32% | 17.796<br>21 | 495 | 82.78% | 19.99<br>772 | Bcor          |
| 1E+08                               | 5190  | 441 | 90.85% | 23.862<br>01 | 408 | 87.59% | 22.10<br>115 | Dnajc3        |
| 11622                               | 5494  | 441 | 89.59% | 22.541<br>65 | 348 | 85.07% | 17.80<br>79  | Ahr           |
| 80287                               | 2459  | 441 | 87.88% | 50.363<br>48 | 249 | 88.86% | 28.46<br>839 | Apobec3       |
| 14389                               | 6008  | 441 | 92.04% | 20.613<br>15 | 374 | 84.07% | 17.50<br>104 | Gab2          |
| gi 149234147 ref X<br>M_001473420.1 | 1599  | 440 | 66.10% | 77.275<br>16 | 388 | 68.17% | 68.21<br>9   | -             |
| 268301                              | 4513  | 440 | 87.17% | 27.379<br>34 | 532 | 85.49% | 33.14<br>121 | Sowahe        |
| 69981                               | 3680  | 439 | 90.65% | 33.500<br>59 | 345 | 87.45% | 26.35<br>684 | Tmem30<br>a   |
| 241447                              | 3930  | 439 | 99.16% | 31.369<br>51 | 453 | 97.61% | 32.40<br>617 | Lass6         |
| 243272                              | 10071 | 439 | 43.90% | 12.241<br>3  | 376 | 41.17% | 10.49<br>633 | Sbno1         |
| 20853                               | 3020  | 439 | 92.85% | 40.821<br>91 | 398 | 90.36% | 37.05<br>086 | Stau1         |
| 20637                               | 1639  | 438 | 93.72% | 75.046<br>57 | 437 | 96.89% | 74.95<br>914 | Snrnp70       |
| 14933                               | 4427  | 438 | 82.92% | 27.784<br>35 | 512 | 82.54% | 32.51<br>491 | Gyk           |
| 13026                               | 4951  | 438 | 90.41% | 24.843<br>74 | 387 | 84.63% | 21.97<br>557 | Pcyl1a        |
| 19704                               | 4631  | 437 | 89.33% | 26.499<br>79 | 327 | 81.60% | 19.85<br>158 | Upf1          |

|                              |       |     |        |              |     |        |              |              |
|------------------------------|-------|-----|--------|--------------|-----|--------|--------------|--------------|
| gi 146134441 ref NM_012057.3 | 2081  | 437 | 98.89% | 58.971<br>89 | 423 | 97.93% | 57.14<br>66  | -            |
| 17874                        | 1947  | 436 | 97.74% | 62.886<br>33 | 537 | 94.61% | 77.54<br>083 | Myd88        |
| 72313                        | 11488 | 436 | 73.23% | 10.658<br>05 | 283 | 50.41% | 6.925<br>707 | Fryl         |
| 56397                        | 1954  | 436 | 57.57% | 62.661<br>05 | 467 | 57.42% | 67.19<br>152 | Morf4l2      |
| 108705                       | 2275  | 436 | 94.51% | 53.819<br>64 | 448 | 94.02% | 55.36<br>289 | Pttg1ip      |
| 15441                        | 3361  | 435 | 91.85% | 36.345<br>99 | 355 | 90.06% | 29.69<br>491 | Hp1bp3       |
| 14030                        | 2400  | 435 | 81.42% | 50.899<br>52 | 436 | 82.04% | 51.07<br>371 | Ewsr1        |
| 17970                        | 2596  | 435 | 72.15% | 47.056<br>57 | 567 | 73.42% | 61.40<br>454 | Ncf2         |
| 214290                       | 5569  | 434 | 80.19% | 21.885<br>08 | 344 | 73.15% | 17.36<br>614 | Zcchc6       |
| 20832                        | 821   | 434 | 78.08% | 148.45<br>07 | 526 | 80.02% | 180.1<br>211 | Ssr4         |
| 13018                        | 3848  | 434 | 94.26% | 31.673<br>09 | 322 | 85.78% | 23.52<br>572 | Ctcf         |
| 225432                       | 6266  | 434 | 90.73% | 19.450<br>69 | 385 | 85.49% | 17.27<br>398 | Rbm27        |
| 79221                        | 4461  | 434 | 89.96% | 27.320<br>79 | 308 | 85.34% | 19.41<br>067 | Hdac9        |
| 269717                       | 3851  | 434 | 39.52% | 31.648<br>41 | 716 | 39.24% | 52.27<br>11  | Orai2        |
| 27366                        | 4071  | 434 | 48.19% | 29.938<br>11 | 463 | 52.12% | 31.97<br>437 | Txn14a       |
| 94245                        | 1311  | 434 | 94.36% | 92.965<br>7  | 421 | 97.48% | 90.28<br>207 | Dtnbp1       |
| 66624                        | 2815  | 433 | 54.46% | 43.196<br>17 | 448 | 56.52% | 44.74<br>265 | Spes2        |
| 228775                       | 2051  | 433 | 95.42% | 59.286<br>79 | 397 | 94.93% | 54.41<br>855 | Trib3        |
| 107939                       | 5602  | 433 | 78.85% | 21.706<br>04 | 317 | 78.51% | 15.90<br>883 | Pom121       |
| 267019                       | 5158  | 433 | 51.65% | 23.574<br>49 | 492 | 55.74% | 26.81<br>673 | Rps15a       |
| 98170                        | 3543  | 432 | 61.76% | 34.241<br>15 | 508 | 56.05% | 40.31<br>017 | Tmem13<br>2a |
| 12444                        | 5772  | 432 | 88.31% | 21.018<br>08 | 366 | 87.32% | 17.82<br>694 | Ccnd2        |

|                                 |      |     |        |              |     |        |              |         |
|---------------------------------|------|-----|--------|--------------|-----|--------|--------------|---------|
| 140780                          | 6585 | 432 | 79.27% | 18.423<br>14 | 308 | 71.36% | 13.14<br>974 | Bmp2k   |
| 16976                           | 2922 | 431 | 95.59% | 41.422<br>16 | 537 | 98.56% | 51.66<br>735 | Lrpa1   |
| 208104                          | 7300 | 431 | 85.44% | 16.580<br>21 | 292 | 71.84% | 11.24<br>559 | Mlxip   |
| 192292                          | 2146 | 430 | 92.96% | 56.269<br>68 | 301 | 94.83% | 39.43<br>292 | Nrbp1   |
| 58801                           | 2654 | 430 | 95.67% | 45.499<br>15 | 404 | 93.86% | 42.79<br>594 | Pmaip1  |
| 29815                           | 3316 | 430 | 95.42% | 36.415<br>78 | 288 | 86.04% | 24.41<br>744 | Bcar3   |
| 74388                           | 4799 | 430 | 93.87% | 25.162<br>48 | 309 | 87.60% | 18.10<br>214 | Dpp8    |
| 26931                           | 4224 | 430 | 89.11% | 28.587<br>77 | 397 | 85.77% | 26.42<br>34  | Ppp2r5c |
| 107373                          | 3199 | 429 | 96.66% | 37.659<br>87 | 298 | 91.84% | 26.18<br>932 | Fam111a |
| 12521                           | 1817 | 429 | 93.23% | 66.303<br>75 | 336 | 93.84% | 51.98<br>84  | Cd82    |
| gi 84370255 ref N<br>M_133769.2 | 6352 | 429 | 84.27% | 18.966<br>3  | 224 | 69.49% | 9.914<br>245 | -       |
| 98415                           | 6096 | 428 | 88.39% | 19.716<br>71 | 321 | 78.59% | 14.80<br>411 | Nucks1  |
| 20306                           | 912  | 428 | 83.66% | 131.79<br>07 | 798 | 90.68% | 245.9<br>972 | Ccl7    |
| 216134                          | 5110 | 428 | 91.43% | 23.521<br>15 | 450 | 86.05% | 24.75<br>79  | Pdxk    |
| 66912                           | 1889 | 428 | 95.39% | 63.627<br>89 | 357 | 94.65% | 53.13<br>227 | Bzw2    |
| 14269                           | 4743 | 428 | 90.89% | 25.341<br>15 | 295 | 87.31% | 17.48<br>602 | Fnbp1   |
| 27053                           | 1927 | 428 | 97.30% | 62.373<br>16 | 353 | 94.03% | 51.50<br>093 | Asns    |
| 19201                           | 3138 | 428 | 95.44% | 38.302<br>45 | 470 | 94.14% | 42.10<br>823 | Pstpip2 |
| 217151                          | 1616 | 427 | 85.95% | 74.203<br>13 | 346 | 81.93% | 60.19<br>451 | Arl5c   |
| 93759                           | 3920 | 427 | 84.18% | 30.589<br>86 | 370 | 81.10% | 26.53<br>614 | Sirt1   |
| 52588                           | 2500 | 427 | 93.84% | 47.964<br>9  | 394 | 92.64% | 44.30<br>761 | Tspan14 |
| 12400                           | 2924 | 427 | 86.53% | 41.009<br>66 | 376 | 87%    | 36.15<br>202 | Cbfb    |

|                                 |      |     |        |              |     |        |              |              |
|---------------------------------|------|-----|--------|--------------|-----|--------|--------------|--------------|
| 20198                           | 513  | 427 | 88.69% | 233.74<br>71 | 417 | 90.64% | 228.5<br>287 | S100a4       |
| 97287                           | 2676 | 427 | 94.84% | 44.810<br>26 | 370 | 92.12% | 38.87<br>208 | Mtmt14       |
| 80912                           | 5370 | 426 | 91.64% | 22.277<br>73 | 318 | 83.09% | 16.64<br>849 | Pum1         |
| 78816                           | 3945 | 426 | 93.46% | 30.324<br>82 | 338 | 91.23% | 24.08<br>75  | Gmip         |
| gi 89337271 ref N<br>M_144516.2 | 3846 | 425 | 91.37% | 31.032<br>4  | 369 | 89.24% | 26.97<br>362 | -            |
| 320011                          | 9045 | 425 | 55%    | 13.195<br>2  | 338 | 51.83% | 10.50<br>583 | Uggt1        |
| 19255                           | 8423 | 425 | 50.98% | 14.169<br>61 | 397 | 42.56% | 13.25<br>091 | Ptpn2        |
| 11783                           | 6557 | 425 | 84.79% | 18.202<br>01 | 295 | 72.35% | 12.64<br>85  | Apaf1        |
| 52857                           | 2681 | 425 | 96.57% | 44.517<br>2  | 445 | 96.01% | 46.66<br>436 | Gramd1a      |
| 20661                           | 6804 | 425 | 85.83% | 17.541<br>24 | 374 | 79.92% | 15.45<br>359 | Sort1        |
| 59021                           | 2057 | 425 | 88.72% | 58.021<br>69 | 397 | 90.13% | 54.25<br>982 | Rab2a        |
| 20529                           | 3764 | 424 | 95.62% | 31.633<br>84 | 522 | 92.03% | 38.98<br>908 | Slc31a1      |
| 11518                           | 4047 | 424 | 88.29% | 29.421<br>74 | 329 | 82.88% | 22.85<br>519 | Add1         |
| 66854                           | 3684 | 424 | 95.22% | 32.320<br>79 | 316 | 88.11% | 24.11<br>513 | Trim35       |
| 106064                          | 5094 | 424 | 91.79% | 23.374<br>52 | 234 | 78.86% | 12.91<br>454 | AW5498<br>77 |
| 12450                           | 3501 | 424 | 92.29% | 34.010<br>22 | 305 | 91.17% | 24.49<br>232 | Ccng1        |
| 24128                           | 3383 | 424 | 96.84% | 35.196<br>51 | 357 | 94.68% | 29.66<br>8   | Xrn2         |
| 193116                          | 3732 | 423 | 75.99% | 31.829<br>84 | 337 | 78.72% | 25.38<br>694 | Slu7         |
| 20539                           | 3513 | 423 | 47.57% | 33.814<br>11 | 316 | 44.66% | 25.28<br>896 | Slc7a5       |
| 70247                           | 3256 | 423 | 94.23% | 36.483<br>1  | 362 | 95.30% | 31.25<br>693 | Psm1         |
| 20296                           | 806  | 422 | 96.40% | 147.03<br>24 | 852 | 98.26% | 297.1<br>849 | Ccl2         |
| 76302                           | 2300 | 422 | 93.65% | 51.525<br>28 | 453 | 91.13% | 55.37<br>229 | Pcnp         |

|                                     |       |     |        |              |     |        |              |          |
|-------------------------------------|-------|-----|--------|--------------|-----|--------|--------------|----------|
| 56463                               | 3482  | 421 | 97.44% | 33.953<br>85 | 351 | 95.26% | 28.34<br>004 | Snd1     |
| 216198                              | 2400  | 421 | 93.54% | 49.261<br>38 | 280 | 96.04% | 32.79<br>963 | Tcp1112  |
| 57330                               | 5453  | 421 | 90.37% | 21.681<br>15 | 313 | 76.45% | 16.13<br>73  | Gigyf1   |
| 76303                               | 4590  | 420 | 87.04% | 25.696<br>4  | 414 | 86.51% | 25.35<br>769 | Osbp     |
| 244059                              | 9071  | 420 | 30.79% | 13.002<br>59 | 429 | 30.66% | 13.29<br>61  | Chd2     |
| 78937                               | 6691  | 420 | 83.20% | 17.627<br>63 | 286 | 71.13% | 12.01<br>703 | Avl9     |
| 56449                               | 1862  | 420 | 91.19% | 63.343<br>98 | 423 | 82.38% | 63.86<br>793 | Csda     |
| 16646                               | 4022  | 420 | 93.93% | 29.325<br>33 | 304 | 93.04% | 21.24<br>974 | Kpna1    |
| 20558                               | 3972  | 420 | 93.13% | 29.694<br>48 | 510 | 92.42% | 36.09<br>799 | Slfn4    |
| gi 124487030 ref N<br>M_001081371.1 | 11843 | 420 | 68.79% | 9.9591<br>73 | 239 | 51.40% | 5.673<br>594 | -        |
| 71982                               | 2567  | 420 | 91.23% | 45.947<br>21 | 536 | 95.56% | 58.70<br>31  | Snx10    |
| 66691                               | 5966  | 420 | 80.51% | 19.769<br>78 | 314 | 71.44% | 14.79<br>682 | Gapvd1   |
| 67958                               | 7736  | 419 | 74.90% | 15.210<br>14 | 411 | 66.90% | 14.93<br>645 | U2surp   |
| 114565                              | 6011  | 419 | 77.08% | 19.575<br>06 | 434 | 74.03% | 20.29<br>855 | Zfp295   |
| 101706                              | 7214  | 418 | 83.05% | 16.271<br>81 | 268 | 67.88% | 10.44<br>433 | Numa1    |
| 209086                              | 5344  | 418 | 88.74% | 21.965<br>72 | 269 | 73.73% | 14.15<br>168 | Samd91   |
| 18226                               | 2397  | 418 | 96.20% | 48.971<br>56 | 386 | 98.58% | 45.27<br>322 | Nup62    |
| 76905                               | 1372  | 418 | 97.52% | 85.557<br>46 | 661 | 97.89% | 135.4<br>47  | Lrg1     |
| 13421                               | 3702  | 418 | 79.58% | 31.708<br>49 | 303 | 78.20% | 23.01<br>062 | Dnase113 |
| 12753                               | 7478  | 417 | 81.60% | 15.659<br>8  | 289 | 71.30% | 10.86<br>512 | Clock    |
| 544963                              | 5771  | 417 | 91.28% | 20.291<br>81 | 324 | 79.19% | 15.78<br>396 | Iqgap2   |
| 20868                               | 5082  | 417 | 92.19% | 23.042<br>9  | 291 | 82.98% | 16.09<br>832 | Stk10    |

|                              |      |     |        |              |     |        |              |         |
|------------------------------|------|-----|--------|--------------|-----|--------|--------------|---------|
| gi 209954828 ref NM_011327.3 | 2623 | 417 | 73.47% | 44.645<br>07 | 404 | 69.84% | 43.30<br>172 | -       |
| 16648                        | 4167 | 417 | 89.73% | 28.102<br>71 | 374 | 90.95% | 25.23<br>308 | Kpna3   |
| 11513                        | 6121 | 417 | 83.40% | 19.131<br>52 | 297 | 73.39% | 13.64<br>131 | Adcy7   |
| 217039                       | 2967 | 416 | 83.05% | 39.374<br>18 | 460 | 91.71% | 43.58<br>754 | Ggnbp2  |
| 65106                        | 1339 | 416 | 92.76% | 87.246<br>59 | 466 | 93.65% | 97.84<br>248 | Arl6ip5 |
| 17691                        | 4512 | 416 | 91.62% | 25.891<br>66 | 220 | 79.59% | 13.70<br>805 | Sik1    |
| 67526                        | 2492 | 416 | 95.02% | 46.879<br>29 | 334 | 93.02% | 37.68<br>084 | Atg12   |
| 14950                        | 5402 | 416 | 50.87% | 21.625<br>91 | 369 | 36.80% | 19.20<br>41  | H13     |
| 67074                        | 9300 | 415 | 67.57% | 12.531<br>44 | 314 | 51.73% | 9.492<br>242 | Mon2    |
| 381801                       | 2646 | 415 | 95.99% | 44.044<br>73 | 344 | 95.05% | 36.55<br>028 | Tatdn2  |
| 68926                        | 4384 | 415 | 96.12% | 26.583<br>57 | 304 | 90.99% | 19.49<br>509 | Ubap2   |
| 353187                       | 4640 | 415 | 77.05% | 25.116<br>89 | 422 | 76.79% | 25.56<br>917 | Nr1d2   |
| 67998                        | 3179 | 415 | 87.07% | 36.660<br>07 | 287 | 83.86% | 25.38<br>128 | Fam134c |
| 71902                        | 8209 | 415 | 65.61% | 14.196<br>9  | 336 | 53.61% | 11.50<br>724 | Cand1   |
| 22343                        | 4137 | 415 | 89.63% | 28.170<br>74 | 377 | 90.52% | 25.61<br>993 | Lin7c   |
| 56612                        | 708  | 415 | 87.43% | 164.60<br>79 | 425 | 87.85% | 168.7<br>632 | Pfdn5   |
| 209131                       | 7507 | 415 | 82.52% | 15.524<br>49 | 259 | 65.15% | 9.699<br>637 | Snx30   |
| 229541                       | 5399 | 414 | 90.96% | 21.533<br>9  | 298 | 78.50% | 15.51<br>762 | Dennd4b |
| gi 124487316 ref NM_008395.2 | 5214 | 414 | 91.31% | 22.297<br>95 | 364 | 83.89% | 19.62<br>693 | -       |
| 67474                        | 3432 | 413 | 91.93% | 33.793<br>91 | 312 | 86.83% | 25.55<br>815 | Snap29  |
| 23921                        | 2848 | 413 | 96.14% | 40.723<br>56 | 383 | 91.78% | 37.80<br>776 | Sh2b2   |
| 52040                        | 4290 | 413 | 65.17% | 27.035<br>13 | 312 | 63.01% | 20.44<br>652 | Ppp1r10 |

|                              |       |     |        |              |     |        |              |              |
|------------------------------|-------|-----|--------|--------------|-----|--------|--------------|--------------|
| 98732                        | 7003  | 413 | 56.69% | 16.561<br>57 | 278 | 53.13% | 11.16<br>048 | Rab3gap<br>2 |
| 665775                       | 10552 | 413 | 70.97% | 10.991<br>35 | 361 | 64.73% | 9.618<br>216 | Bod11        |
| 19247                        | 5628  | 413 | 86.28% | 20.607<br>8  | 298 | 78.68% | 14.88<br>622 | Ptpn11       |
| 227659                       | 2136  | 413 | 98.08% | 54.298<br>09 | 400 | 97%    | 52.64<br>788 | Slc2a6       |
| 108148                       | 4131  | 413 | 92.54% | 28.075<br>7  | 376 | 89.11% | 25.58<br>909 | Galnt2       |
| 55944                        | 1910  | 412 | 95.18% | 60.575<br>86 | 375 | 96.28% | 55.19<br>758 | Eif3d        |
| 230908                       | 7454  | 412 | 57.26% | 15.521<br>85 | 399 | 56.63% | 15.04<br>893 | Tardbp       |
| 70439                        | 2049  | 412 | 92.29% | 56.466<br>51 | 398 | 90.63% | 54.60<br>888 | Taf15        |
| 218914                       | 4585  | 411 | 89.53% | 25.173<br>19 | 303 | 83.18% | 18.57<br>913 | Wapal        |
| 208650                       | 6323  | 411 | 86.32% | 18.253<br>84 | 315 | 79.79% | 14.00<br>585 | Cblb         |
| 98496                        | 2667  | 411 | 97.64% | 43.276<br>74 | 484 | 97.04% | 51.02<br>047 | Pid1         |
| 52468                        | 4823  | 410 | 62.39% | 23.872<br>74 | 311 | 62.02% | 18.12<br>864 | Ctdsp2       |
| 69131                        | 7669  | 409 | 82.79% | 14.976<br>84 | 393 | 83.13% | 14.40<br>708 | Cdk12        |
| 110521                       | 8753  | 409 | 78.42% | 13.122<br>06 | 284 | 64.74% | 9.121<br>863 | Hivep1       |
| 83493                        | 3433  | 409 | 96.62% | 33.456<br>86 | 443 | 94.52% | 36.27<br>873 | Sacm11       |
| 53605                        | 3951  | 409 | 57.05% | 29.070<br>47 | 331 | 56.14% | 23.55<br>283 | Nap111       |
| gi 118130643 ref NM_029657.3 | 3138  | 409 | 97.23% | 36.602<br>11 | 308 | 91.24% | 27.59<br>433 | -            |
| 22218                        | 1230  | 409 | 95.04% | 93.380<br>01 | 465 | 90.89% | 106.2<br>845 | Sumo1        |
| 13001                        | 1125  | 409 | 81.33% | 102.09<br>55 | 469 | 81.42% | 117.2<br>04  | Csnk2b       |
| 19317                        | 6718  | 409 | 62.16% | 17.096<br>96 | 453 | 64.32% | 18.95<br>747 | Qk           |
| 18438                        | 1995  | 409 | 97.39% | 57.572<br>64 | 354 | 93.58% | 49.88<br>644 | P2rx4        |
| 271457                       | 2364  | 409 | 72.97% | 48.586<br>04 | 387 | 70.60% | 46.02<br>413 | Rab5a        |



|                                  |       |     |        |              |     |        |              |                   |
|----------------------------------|-------|-----|--------|--------------|-----|--------|--------------|-------------------|
| 24044                            | 2370  | 409 | 97.89% | 48.463<br>04 | 395 | 98.10% | 46.85<br>661 | Scamp2            |
| 14977                            | 2398  | 409 | 95.70% | 47.897<br>17 | 393 | 95.29% | 46.07<br>502 | Slc39a7           |
| 72425                            | 2883  | 408 | 89.87% | 39.742<br>14 | 297 | 91.54% | 28.96<br>236 | 2410042<br>D21Rik |
| 16906                            | 2871  | 408 | 82.20% | 39.908<br>25 | 311 | 78.51% | 30.45<br>435 | Lmnb1             |
| 232201                           | 2831  | 408 | 92.02% | 40.472<br>12 | 323 | 89.76% | 32.07<br>634 | Arhgap2<br>5      |
| 319277                           | 5863  | 408 | 89.19% | 19.542<br>31 | 199 | 66.38% | 9.542<br>349 | A230046<br>K03Rik |
| 15170                            | 2222  | 408 | 86.72% | 51.564<br>62 | 269 | 87.71% | 34.03<br>536 | Ptpn6             |
| 241197                           | 3490  | 408 | 56.79% | 32.829<br>97 | 496 | 56.28% | 39.95<br>567 | Serpnb1<br>0      |
| 213491                           | 3277  | 408 | 91.70% | 34.963<br>86 | 408 | 92.34% | 35.00<br>305 | Szrd1             |
| 20788                            | 4570  | 408 | 95.51% | 25.071<br>46 | 303 | 91.27% | 18.64<br>011 | Sreb2             |
| 17684                            | 1980  | 407 | 94.55% | 57.725<br>13 | 485 | 86.87% | 68.86<br>502 | Cited2            |
| 17257                            | 10233 | 407 | 72.45% | 11.169<br>33 | 304 | 58.39% | 8.352<br>043 | Mecp2             |
| gi 158518439 ref N<br>M_028032.2 | 2380  | 407 | 99.75% | 48.023<br>43 | 436 | 99.08% | 51.50<br>29  | -                 |
| 224273                           | 6544  | 407 | 73.75% | 17.465<br>73 | 352 | 68.03% | 15.12<br>243 | Crybg3            |
| 76246                            | 4680  | 407 | 94.85% | 24.422<br>17 | 393 | 87.48% | 23.60<br>852 | Rtf1              |
| 17188                            | 2385  | 406 | 91.15% | 47.805       | 326 | 90.57% | 38.42<br>831 | Maz               |
| 17308                            | 3165  | 406 | 84.23% | 36.023<br>68 | 338 | 77.88% | 30.02<br>376 | Mgat1             |
| 54338                            | 6487  | 406 | 83%    | 17.575<br>91 | 294 | 67.26% | 12.74<br>165 | Slc23a2           |
| 110911                           | 8278  | 406 | 83.11% | 13.773<br>25 | 295 | 68.17% | 10.01<br>887 | Cds2              |
| 15387                            | 1978  | 406 | 41.30% | 57.641<br>52 | 370 | 43.07% | 52.58<br>932 | Hnrnpk            |
| 18854                            | 5378  | 405 | 86.20% | 21.148<br>03 | 224 | 75.20% | 11.70<br>98  | Pml               |
| gi 70608130 ref N<br>M_029673.2  | 2766  | 405 | 89.26% | 41.118<br>62 | 353 | 92.77% | 35.87<br>936 | -                 |

|        |       |     |        |              |     |        |              |              |
|--------|-------|-----|--------|--------------|-----|--------|--------------|--------------|
| 66589  | 1950  | 405 | 83.59% | 58.325<br>18 | 375 | 83.23% | 54.06<br>532 | Ube2v1       |
| 19646  | 4407  | 405 | 72.02% | 25.807<br>6  | 347 | 61.15% | 22.13<br>648 | Rbbp4        |
| 106021 | 3842  | 404 | 91.88% | 29.529<br>75 | 310 | 83.39% | 22.68<br>436 | Topors       |
| 235283 | 2814  | 404 | 90.19% | 40.317<br>44 | 300 | 86.43% | 29.97<br>225 | Grand1b      |
| 218975 | 4493  | 404 | 68.08% | 25.251<br>12 | 404 | 65.95% | 25.27<br>942 | Mapk1p<br>11 |
| 66923  | 8117  | 404 | 77.60% | 13.977<br>24 | 308 | 66.53% | 10.66<br>786 | Pbrm1        |
| 15926  | 2292  | 404 | 88.66% | 49.499<br>69 | 420 | 88.79% | 51.51<br>774 | Idh1         |
| 71865  | 4977  | 404 | 79.55% | 22.795<br>52 | 453 | 87.86% | 25.58<br>896 | Fbxo30       |
| 213988 | 17334 | 404 | 58.12% | 6.5451<br>3  | 271 | 44.89% | 4.395<br>341 | Tnrc6b       |
| 106205 | 3857  | 403 | 91.31% | 29.342<br>09 | 428 | 94.84% | 31.19<br>725 | Zc3h7a       |
| 72194  | 8607  | 403 | 80.04% | 13.148<br>89 | 232 | 60.46% | 7.578<br>065 | Fbxl20       |
| 72759  | 3693  | 403 | 89.60% | 30.645<br>13 | 431 | 81.75% | 32.81<br>105 | Tmem13<br>5  |
| 268741 | 4458  | 403 | 81.81% | 25.386<br>38 | 335 | 74.32% | 21.12<br>647 | Tox4         |
| 74868  | 3644  | 402 | 86.11% | 30.980<br>14 | 222 | 80.02% | 17.12<br>761 | Tmem65       |
| 208768 | 3203  | 402 | 94.79% | 35.245<br>59 | 609 | 96.88% | 53.45<br>428 | Sde2         |
| 17318  | 3974  | 402 | 61.75% | 28.407<br>56 | 466 | 60.47% | 32.96<br>706 | Mid1         |
| 170743 | 3746  | 402 | 57.37% | 30.136<br>58 | 474 | 57.13% | 35.57<br>4   | Thr7         |
| 68691  | 4655  | 401 | 80.34% | 24.191<br>37 | 399 | 79.27% | 24.09<br>769 | Kansl11      |
| 74522  | 5085  | 401 | 88.83% | 22.145<br>69 | 328 | 81%    | 18.13<br>448 | Morc2a       |
| 244871 | 6133  | 401 | 85.70% | 18.361<br>46 | 388 | 82.08% | 17.78<br>611 | Zc3h12c      |
| 69470  | 4401  | 401 | 87.62% | 25.587<br>55 | 316 | 84.50% | 20.18<br>635 | Tmem12<br>7  |
| 56221  | 1289  | 401 | 96.74% | 87.362<br>92 | 720 | 99.69% | 157.0<br>369 | Ccl24        |

|        |       |     |        |              |     |        |              |              |
|--------|-------|-----|--------|--------------|-----|--------|--------------|--------------|
| 56374  | 1562  | 401 | 90.97% | 72.093<br>99 | 422 | 90.59% | 75.95<br>451 | Tmem59       |
| 11749  | 2661  | 400 | 92.30% | 42.213<br>45 | 423 | 92.07% | 44.69<br>075 | Anxa6        |
| 11744  | 2413  | 400 | 42.81% | 46.552       | 280 | 41.69% | 32.62<br>292 | Anxa11       |
| 17001  | 588   | 400 | 99.15% | 191.03<br>74 | 499 | 99.15% | 238.5<br>862 | Ltc4s        |
| 56494  | 3078  | 400 | 94.93% | 36.494<br>47 | 331 | 94.70% | 30.23<br>302 | Gosr2        |
| 72068  | 2816  | 400 | 97.09% | 39.889<br>91 | 285 | 95.92% | 28.45<br>341 | Cnot2        |
| 214899 | 10969 | 400 | 66.20% | 10.240<br>68 | 335 | 57.46% | 8.586<br>178 | Kdm5a        |
| 73341  | 4580  | 400 | 90.37% | 24.526<br>2  | 314 | 86.83% | 19.27<br>464 | Arhgef6      |
| 59043  | 2438  | 400 | 82.12% | 46.074<br>65 | 421 | 82.44% | 48.54<br>791 | Wsb2         |
| 67886  | 7823  | 400 | 76.49% | 14.358<br>94 | 317 | 69.96% | 11.39<br>221 | Camsap2      |
| 19042  | 2789  | 400 | 80.60% | 40.276<br>08 | 445 | 84.98% | 44.85<br>735 | Ppm1a        |
| 277360 | 6530  | 399 | 87.40% | 17.159<br>14 | 272 | 70.95% | 11.71<br>056 | Prex1        |
| 78388  | 2810  | 399 | 96.58% | 39.875<br>15 | 376 | 94.38% | 37.61<br>869 | Mvp          |
| 101471 | 5374  | 399 | 89.78% | 20.850<br>23 | 317 | 78.12% | 16.58<br>379 | Phrf1        |
| 210973 | 3868  | 399 | 89.53% | 28.968<br>24 | 368 | 86.74% | 26.74<br>752 | Kbtbd2       |
| 69257  | 2688  | 399 | 96.02% | 41.684<br>96 | 288 | 87.39% | 30.12<br>211 | Elf2         |
| 18611  | 2477  | 399 | 96.04% | 45.235<br>83 | 392 | 93.98% | 44.49<br>203 | Pea15a       |
| 20148  | 1731  | 399 | 97.63% | 64.730<br>88 | 339 | 96.24% | 55.05<br>855 | Dhrs3        |
| 17135  | 2825  | 398 | 96.46% | 39.564<br>01 | 505 | 98.62% | 50.25<br>682 | Mafk         |
| 12481  | 1144  | 398 | 98.08% | 97.699<br>59 | 271 | 92.66% | 66.59<br>864 | Cd2          |
| 69632  | 10483 | 398 | 51.37% | 10.661<br>87 | 198 | 38.70% | 5.310<br>088 | Arhgef1<br>2 |
| 70829  | 7272  | 398 | 87.13% | 15.369<br>68 | 289 | 73.09% | 11.17<br>29  | Ccdc93       |

|        |       |     |        |              |     |        |              |                   |
|--------|-------|-----|--------|--------------|-----|--------|--------------|-------------------|
| 12489  | 2571  | 397 | 95.33% | 43.363<br>48 | 266 | 91.99% | 29.08<br>718 | Cd33              |
| 216443 | 2972  | 397 | 92.40% | 37.512<br>62 | 268 | 85.50% | 25.35<br>176 | Mars              |
| 75956  | 8613  | 397 | 22.78% | 12.944<br>1  | 244 | 22.72% | 7.964<br>481 | Srm2              |
| 67467  | 5448  | 397 | 90.20% | 20.463<br>93 | 242 | 77.04% | 12.48<br>822 | 1200011<br>I18Rik |
| 269181 | 7054  | 397 | 85.13% | 15.804<br>86 | 318 | 70.43% | 12.67<br>4   | Mgat4a            |
| 27061  | 1214  | 397 | 95.72% | 91.834<br>85 | 405 | 96.62% | 93.79<br>041 | Bcap31            |
| 74145  | 3879  | 396 | 96.52% | 28.668<br>91 | 489 | 96.96% | 35.44<br>143 | F13a1             |
| 22629  | 1806  | 396 | 90.70% | 61.576<br>24 | 327 | 92.47% | 50.90<br>403 | Ywhah             |
| 78246  | 2014  | 396 | 86.05% | 55.216<br>82 | 357 | 83.37% | 49.83<br>459 | Phf23             |
| 215653 | 4825  | 395 | 92.60% | 22.989<br>82 | 281 | 76.93% | 16.37<br>311 | Rassf2            |
| 320706 | 13232 | 395 | 53.85% | 8.3831<br>51 | 367 | 48.67% | 7.797<br>631 | 9830001<br>H06Rik |
| 22241  | 5215  | 395 | 85.73% | 21.270<br>54 | 299 | 83.59% | 16.11<br>903 | Ulk1              |
| 208266 | 5694  | 394 | 88.85% | 19.431<br>86 | 402 | 85.99% | 19.84<br>864 | Dot11             |
| 12894  | 4331  | 394 | 93.28% | 25.547<br>23 | 279 | 84.69% | 18.11<br>082 | Cpt1a             |
| 70354  | 6797  | 394 | 82.52% | 16.278<br>51 | 251 | 61.09% | 10.38<br>194 | Secisbp2<br>l     |
| 20340  | 3880  | 394 | 95.93% | 28.516<br>76 | 323 | 87.81% | 23.40<br>415 | Glg1              |
| 319934 | 7163  | 393 | 81.36% | 15.407<br>54 | 341 | 71.95% | 13.38<br>386 | Sbf2              |
| 13998  | 8061  | 393 | 82.69% | 13.691<br>13 | 206 | 61.82% | 7.184<br>564 | Fgd6              |
| 14247  | 3087  | 393 | 92.55% | 35.751<br>28 | 308 | 91.22% | 28.05<br>022 | Fli1              |
| 107035 | 4416  | 393 | 88.04% | 24.991<br>9  | 294 | 83.83% | 18.71<br>718 | Fbxo38            |
| 71990  | 3956  | 393 | 81.02% | 27.897<br>93 | 315 | 74.60% | 22.38<br>599 | Ddx54             |
| 245945 | 5115  | 392 | 85.10% | 21.521<br>68 | 365 | 79.22% | 20.06<br>177 | Rbm47             |

|                                 |      |     |        |              |     |        |              |              |
|---------------------------------|------|-----|--------|--------------|-----|--------|--------------|--------------|
| 320938                          | 3971 | 392 | 95.04% | 27.721<br>83 | 357 | 90.18% | 25.27<br>496 | Tnpo3        |
| 80281                           | 4946 | 392 | 91.83% | 22.257<br>05 | 261 | 85.48% | 14.83<br>572 | Ctnbp2n<br>l |
| 22042                           | 4920 | 392 | 86.20% | 22.374<br>67 | 341 | 80.24% | 19.48<br>549 | Tfrc         |
| 54624                           | 1953 | 392 | 99.08% | 56.366<br>3  | 422 | 97.59% | 60.74<br>805 | Paf1         |
| 107045                          | 3845 | 392 | 92.54% | 28.630<br>27 | 318 | 90.95% | 23.25<br>16  | Lars         |
| 231070                          | 2667 | 391 | 95.20% | 41.170<br>81 | 596 | 97.86% | 62.82<br>686 | Insig1       |
| 21985                           | 2432 | 391 | 74.55% | 45.149<br>08 | 348 | 73.23% | 40.22<br>887 | Tpd52        |
| 18003                           | 4563 | 390 | 93.16% | 24.002<br>13 | 276 | 92%    | 17.00<br>516 | Nedd9        |
| 22385                           | 6446 | 390 | 86.72% | 16.990<br>65 | 240 | 66.96% | 10.46<br>75  | Baz1b        |
| 230125                          | 4438 | 390 | 88.69% | 24.678<br>17 | 313 | 87.13% | 19.82<br>801 | Mcart1       |
| 56085                           | 3693 | 389 | 94.72% | 29.580<br>53 | 365 | 93.88% | 27.78<br>662 | Ubqln1       |
| 229603                          | 8101 | 389 | 82.51% | 13.484<br>87 | 304 | 74.53% | 10.55<br>011 | Otud7b       |
| 19703                           | 1434 | 389 | 98.40% | 76.179<br>16 | 404 | 93.79% | 79.20<br>532 | Renbp        |
| 66945                           | 2859 | 389 | 98.15% | 38.209<br>48 | 365 | 97.62% | 35.89<br>226 | Sdha         |
| 22258                           | 3686 | 387 | 94.82% | 29.484<br>34 | 298 | 90.86% | 22.72<br>914 | Usp4         |
| 74096                           | 2782 | 387 | 83.93% | 39.065<br>15 | 239 | 81.81% | 24.15<br>254 | Hvcn1        |
| 1E+08                           | 1301 | 387 | 97.23% | 83.535<br>17 | 201 | 90.08% | 43.43<br>511 | Gm3700       |
| 69065                           | 1583 | 387 | 98.42% | 68.653<br>99 | 399 | 97.73% | 70.86<br>211 | Chac1        |
| 218503                          | 5141 | 387 | 84.52% | 21.139<br>71 | 318 | 79.44% | 17.39<br>008 | Fcho2        |
| gi 31340973 ref N<br>M_181411.2 | 3912 | 386 | 91.16% | 27.709<br>21 | 317 | 85.58% | 22.78<br>151 | -            |
| gi 82524293 ref N<br>M_146110.2 | 1738 | 386 | 99.48% | 62.369<br>64 | 350 | 97.47% | 56.61<br>616 | -            |
| 11974                           | 800  | 386 | 94.37% | 135.49<br>8  | 460 | 91.37% | 161.6<br>553 | Atp6v0e      |

|        |      |     |        |              |     |        |              |                   |
|--------|------|-----|--------|--------------|-----|--------|--------------|-------------------|
| 81535  | 3324 | 386 | 85.23% | 32.610<br>84 | 342 | 81.56% | 28.92<br>592 | Sgpp1             |
| 64297  | 4525 | 386 | 77.30% | 23.955<br>46 | 460 | 77.75% | 28.57<br>994 | Gprc5b            |
| 16911  | 1704 | 386 | 93.02% | 63.614<br>11 | 450 | 91.73% | 74.24<br>463 | Lmo4              |
| 68659  | 6627 | 386 | 65.57% | 16.357<br>09 | 290 | 58.52% | 12.30<br>278 | Fam198b           |
| 63985  | 4171 | 386 | 93.38% | 25.988<br>6  | 287 | 89.45% | 19.34<br>478 | Gmfb              |
| 74131  | 2584 | 385 | 99.03% | 41.841<br>18 | 238 | 93.89% | 25.89<br>444 | Sash3             |
| 18783  | 2846 | 385 | 96.94% | 37.989<br>32 | 306 | 96.42% | 30.22<br>795 | Pla2g4a           |
| 83768  | 1684 | 385 | 97.68% | 64.202<br>86 | 367 | 94.77% | 61.26<br>975 | Dpp7              |
| 67655  | 3700 | 384 | 88.24% | 29.145<br>08 | 365 | 86.03% | 27.73<br>405 | Ctdp1             |
| 66921  | 3003 | 384 | 77.56% | 35.909<br>69 | 374 | 78.09% | 35.01<br>373 | Prpf38b           |
| 17769  | 6085 | 384 | 88.28% | 17.721<br>74 | 322 | 80.28% | 14.87<br>707 | Mthfr             |
| 27224  | 4592 | 384 | 92.88% | 23.483<br>62 | 332 | 85.43% | 20.32<br>63  | Tceb3             |
| 14465  | 3194 | 384 | 90.11% | 33.762<br>3  | 271 | 78.15% | 23.85<br>374 | Gata6             |
| 67263  | 5473 | 383 | 78.82% | 19.652<br>1  | 463 | 77.75% | 23.78<br>36  | Zswim6            |
| 14232  | 1730 | 383 | 93.41% | 62.171<br>08 | 401 | 96.18% | 65.16<br>59  | Fkbp8             |
| 230753 | 4350 | 383 | 62.16% | 24.725<br>51 | 320 | 61.49% | 20.68<br>154 | Thrap3            |
| 67579  | 2312 | 383 | 97.79% | 46.520<br>74 | 140 | 92.39% | 17.02<br>403 | Cpeb4             |
| 19089  | 2030 | 383 | 97.68% | 52.983<br>23 | 413 | 97.73% | 57.19<br>738 | Prkcsh            |
| 213673 | 2467 | 383 | 90.47% | 43.597<br>88 | 316 | 91.20% | 36.01<br>14  | 9530068<br>E07Rik |
| 14797  | 1347 | 382 | 91.31% | 79.640<br>04 | 319 | 96.36% | 66.58<br>022 | Aes               |
| 75964  | 5178 | 382 | 87.43% | 20.717<br>48 | 286 | 78.31% | 15.52<br>838 | Trappc8           |
| 22680  | 2376 | 381 | 96.30% | 45.031<br>28 | 323 | 89.56% | 38.21<br>89  | Zfp207            |

|                                  |      |     |        |              |     |        |              |              |
|----------------------------------|------|-----|--------|--------------|-----|--------|--------------|--------------|
| 27357                            | 1739 | 381 | 94.42% | 61.526<br>34 | 332 | 93.44% | 53.67<br>359 | Gyg          |
| 12042                            | 1760 | 381 | 95.06% | 60.792<br>22 | 455 | 96.19% | 72.68<br>099 | Bcl10        |
| 101240                           | 2759 | 381 | 93.37% | 38.780<br>11 | 278 | 90.11% | 28.32<br>795 | Wdr91        |
| 19696                            | 2584 | 381 | 97.99% | 41.406<br>47 | 302 | 95.78% | 32.85<br>765 | Rel          |
| 19027                            | 4615 | 381 | 84.44% | 23.184<br>03 | 309 | 78.40% | 18.82<br>387 | Sypl         |
| 24061                            | 3980 | 380 | 90.78% | 26.812<br>43 | 332 | 87.46% | 23.45<br>185 | Smc1a        |
| 229906                           | 1267 | 380 | 89.34% | 84.225<br>32 | 485 | 98.11% | 107.6<br>186 | Gtf2b        |
| 232807                           | 2982 | 380 | 89.30% | 35.785<br>88 | 359 | 87.66% | 33.84<br>612 | Ppp1r12<br>c |
| gi 149259355 reflX<br>R_034274.1 | 6854 | 379 | 46.70% | 15.528<br>55 | 383 | 46.88% | 15.71<br>002 | -            |
| 110454                           | 842  | 379 | 97.03% | 126.40<br>46 | 335 | 98.46% | 111.8<br>549 | Ly6a         |
| 102414                           | 2494 | 379 | 86.81% | 42.675<br>49 | 382 | 84.60% | 43.06<br>149 | Clk3         |
| 11746                            | 2003 | 379 | 95.76% | 53.136<br>63 | 363 | 96.90% | 50.95<br>042 | Anxa4        |
| 73830                            | 773  | 379 | 99.48% | 137.68<br>78 | 479 | 98.84% | 174.2<br>12  | Eif3k        |
| 11569                            | 6192 | 378 | 79.26% | 17.143<br>38 | 289 | 76.95% | 13.12<br>167 | Aebp2        |
| 21402                            | 1454 | 378 | 91.13% | 73.006<br>76 | 466 | 92.50% | 90.10<br>391 | Skp1a        |
| 227449                           | 6681 | 378 | 76.47% | 15.888<br>61 | 372 | 66.58% | 15.65<br>394 | Zcchc2       |
| 14248                            | 4012 | 378 | 51.55% | 26.458<br>58 | 396 | 49.73% | 27.74<br>958 | Flii         |
| 19401                            | 3384 | 378 | 90.57% | 31.368<br>75 | 357 | 91.76% | 29.65<br>924 | Rara         |
| 20422                            | 491  | 378 | 81.26% | 216.19<br>52 | 460 | 90.63% | 263.3<br>895 | Shfm1        |
| 193670                           | 2867 | 378 | 90.58% | 37.025<br>4  | 338 | 87.76% | 33.14<br>447 | Rnf185       |
| 16363                            | 2484 | 378 | 91.87% | 42.734<br>23 | 570 | 94.20% | 64.51<br>272 | Irf2         |
| 20230                            | 6337 | 377 | 82.96% | 16.706<br>8  | 175 | 66.88% | 7.763<br>838 | Satb1        |

|                                     |      |     |        |              |     |        |              |         |
|-------------------------------------|------|-----|--------|--------------|-----|--------|--------------|---------|
| 30928                               | 4954 | 377 | 81.99% | 21.370<br>81 | 247 | 70.08% | 14.01<br>726 | Zfp238  |
| 52614                               | 3491 | 377 | 90.15% | 30.326<br>84 | 352 | 93.44% | 28.34<br>751 | Emr4    |
| 67876                               | 1748 | 377 | 87.24% | 60.566<br>94 | 554 | 92.33% | 89.10<br>262 | Coq10b  |
| 15161                               | 8093 | 377 | 58.77% | 13.081<br>8  | 232 | 46.30% | 8.059<br>36  | Hcfc1   |
| gi 145966714 ref N<br>M_010064.3    | 2443 | 377 | 97.71% | 43.336<br>48 | 364 | 99.51% | 41.88<br>9   | -       |
| 74840                               | 2206 | 377 | 52.67% | 47.992<br>3  | 393 | 45.24% | 50.08<br>517 | Manf    |
| 67865                               | 875  | 377 | 98.29% | 120.99<br>54 | 533 | 97.71% | 171.2<br>542 | Rgs10   |
| 74204                               | 4493 | 377 | 89.01% | 23.563<br>55 | 281 | 80.61% | 17.58<br>296 | Xpo6    |
| 53322                               | 1697 | 377 | 93.52% | 62.387<br>16 | 430 | 96.82% | 71.23<br>751 | Nucb2   |
| 210808                              | 2419 | 377 | 93.84% | 43.766<br>44 | 447 | 93.84% | 51.95<br>098 | Lacc1   |
| 76438                               | 2802 | 376 | 96.97% | 37.683<br>86 | 313 | 93.68% | 31.40<br>497 | Rftn1   |
| 11949                               | 1815 | 376 | 58.90% | 58.176<br>41 | 365 | 63.69% | 56.53<br>773 | Atp5c1  |
| 15040                               | 1317 | 376 | 84.74% | 80.174<br>78 | 473 | 85.42% | 100.9<br>712 | H2-T23  |
| 76295                               | 4883 | 376 | 84.93% | 21.624<br>04 | 248 | 74.50% | 14.27<br>865 | Atp11b  |
| 20544                               | 4606 | 375 | 93.05% | 22.863<br>52 | 350 | 90.86% | 21.36<br>32  | Slc9a1  |
| 74549                               | 5369 | 375 | 85.38% | 19.614<br>33 | 189 | 71.71% | 9.896<br>703 | Mau2    |
| gi 124487004 ref N<br>M_001081223.1 | 3406 | 375 | 76.13% | 30.918<br>78 | 421 | 80.77% | 34.75<br>038 | -       |
| 69582                               | 4178 | 375 | 88.80% | 25.205<br>69 | 412 | 87.63% | 27.72<br>368 | Plekhm2 |
| 208659                              | 2614 | 375 | 94.26% | 40.286<br>67 | 423 | 97.25% | 45.49<br>429 | Fam20a  |
| 21399                               | 2727 | 375 | 95.34% | 38.617<br>29 | 385 | 92.67% | 39.69<br>152 | Tcea1   |
| 54325                               | 1781 | 375 | 75.46% | 59.129<br>34 | 394 | 78.55% | 62.19<br>485 | Elovl1  |
| 26365                               | 3736 | 374 | 57.84% | 28.112<br>56 | 372 | 54.63% | 27.99<br>356 | Ceacam1 |



|                                  |      |     |        |              |     |        |              |                   |
|----------------------------------|------|-----|--------|--------------|-----|--------|--------------|-------------------|
| gi 48928013 ref N<br>M_133758.2  | 5549 | 374 | 87.48% | 18.927<br>47 | 271 | 75.36% | 13.73<br>019 | -                 |
| 102626                           | 2816 | 374 | 91.90% | 37.297<br>07 | 544 | 91.44% | 54.31<br>107 | Mapkapk<br>3      |
| 229512                           | 4447 | 374 | 89.95% | 23.617<br>84 | 313 | 88.06% | 19.78<br>788 | Smg5              |
| 12611                            | 4718 | 374 | 78.38% | 22.261<br>24 | 355 | 78.93% | 21.15<br>4   | Cebpg             |
| 226551                           | 6308 | 374 | 72.38% | 16.650<br>05 | 289 | 69.02% | 12.88<br>037 | Suco              |
| 103554                           | 6454 | 374 | 79.13% | 16.273<br>4  | 356 | 73.77% | 15.50<br>755 | Psme4             |
| gi 23956077 ref N<br>M_013853.1  | 2488 | 373 | 98.27% | 42.101<br>17 | 313 | 97.47% | 35.36<br>845 | -                 |
| gi 142357495 ref N<br>M_008722.2 | 1259 | 373 | 33.04% | 83.199<br>14 | 440 | 32.72% | 98.25<br>373 | -                 |
| 66631                            | 3472 | 373 | 88.28% | 30.169<br>27 | 300 | 85.94% | 24.29<br>202 | Hiat1             |
| 12462                            | 1957 | 373 | 94.89% | 53.524<br>64 | 331 | 96.73% | 47.55<br>096 | Cct3              |
| 83602                            | 5704 | 372 | 76.16% | 18.314<br>67 | 293 | 69.55% | 14.44<br>143 | Gtf2a1            |
| 14017                            | 2316 | 372 | 70.73% | 45.106<br>6  | 367 | 58.89% | 44.55<br>02  | Evi2a             |
| 71592                            | 7385 | 372 | 84.35% | 14.145<br>82 | 188 | 57.09% | 7.156<br>974 | Pogk              |
| 16000                            | 7121 | 372 | 76.21% | 14.670<br>26 | 334 | 72.07% | 13.18<br>644 | Igf1              |
| 50754                            | 4183 | 372 | 91.70% | 24.974<br>15 | 356 | 85.56% | 23.92<br>678 | Fbxw7             |
| 20638                            | 1121 | 372 | 97.50% | 93.190<br>8  | 410 | 97.77% | 102.8<br>254 | Snrpb             |
| 66776                            | 2866 | 371 | 72.68% | 36.352<br>43 | 312 | 72.68% | 30.60<br>557 | Pisd-ps3          |
| 18451                            | 4057 | 371 | 78.38% | 25.680<br>57 | 370 | 85.78% | 25.64<br>005 | P4ha1             |
| 20466                            | 5229 | 371 | 86.06% | 19.924<br>66 | 248 | 76.63% | 13.33<br>384 | Sin3a             |
| 18597                            | 2778 | 371 | 84.81% | 37.503<br>98 | 305 | 82.15% | 30.86<br>667 | Pdha1             |
| 230249                           | 5919 | 370 | 85.86% | 17.554<br>53 | 251 | 63.88% | 11.92<br>196 | AI31418<br>0      |
| 77128                            | 7455 | 370 | 80.68% | 13.937<br>66 | 196 | 59.30% | 7.391<br>465 | A930001<br>N09Rik |

|                                 |       |     |        |              |     |        |              |        |
|---------------------------------|-------|-----|--------|--------------|-----|--------|--------------|--------|
| 17776                           | 5747  | 370 | 84.03% | 18.079<br>91 | 375 | 82.55% | 18.34<br>477 | Mast2  |
| 20833                           | 2774  | 370 | 93.37% | 37.456<br>83 | 271 | 89.83% | 27.46<br>534 | Ssrp1  |
| 231507                          | 696   | 370 | 93.53% | 149.28<br>91 | 272 | 94.83% | 109.8<br>707 | Plac8  |
| 16562                           | 6764  | 370 | 76.01% | 15.361<br>51 | 317 | 69.15% | 13.17<br>582 | Kif1c  |
| gi 40807501 ref N<br>M_015805.2 | 4463  | 370 | 91.19% | 23.281<br>48 | 265 | 82.84% | 16.69<br>326 | -      |
| gi 41054973 ref N<br>M_199469.1 | 4008  | 370 | 94.69% | 25.924<br>46 | 310 | 89.92% | 21.74<br>483 | -      |
| 18415                           | 3576  | 370 | 95.75% | 29.056<br>27 | 158 | 77.32% | 12.42<br>172 | Hspa4l |
| 12359                           | 2551  | 369 | 91.92% | 40.621<br>09 | 397 | 93.96% | 43.75<br>243 | Cat    |
| 224902                          | 3299  | 369 | 80.45% | 31.410<br>86 | 305 | 79.96% | 25.99<br>2   | Safb2  |
| 237898                          | 6978  | 369 | 85.47% | 14.850<br>16 | 337 | 77.92% | 13.57<br>754 | Usp32  |
| 319939                          | 7483  | 369 | 80.37% | 13.847<br>98 | 283 | 70%    | 10.63<br>244 | Tns3   |
| 17948                           | 4823  | 369 | 81.24% | 21.485<br>47 | 332 | 78.31% | 19.35<br>276 | Naip2  |
| 29806                           | 4864  | 369 | 86.37% | 21.304<br>36 | 276 | 77.41% | 15.95<br>283 | Limd1  |
| 14751                           | 2856  | 369 | 33.26% | 36.283<br>06 | 370 | 37.96% | 36.42<br>216 | Gpi1   |
| 227613                          | 1600  | 368 | 61.75% | 64.589<br>74 | 366 | 58.56% | 64.31<br>07  | Tubb4b |
| 234577                          | 2328  | 368 | 93.86% | 44.391<br>57 | 384 | 89.05% | 46.37<br>355 | Cpne2  |
| 72145                           | 14277 | 368 | 58.73% | 7.2384<br>67 | 283 | 39.53% | 5.572<br>776 | Wdfy3  |
| 225896                          | 1048  | 368 | 88.74% | 98.610<br>29 | 341 | 96.09% | 91.47<br>77  | Ubxn1  |
| 67095                           | 4914  | 368 | 89.15% | 21.030<br>44 | 286 | 85.27% | 16.36<br>263 | Trak1  |
| 76687                           | 3482  | 368 | 89.63% | 29.679<br>38 | 309 | 86.70% | 24.94<br>892 | Spcs3  |
| 19775                           | 7651  | 368 | 82.85% | 13.507<br>2  | 298 | 73.79% | 10.95<br>015 | Xpr1   |
| 15979                           | 2099  | 367 | 93.28% | 49.100<br>89 | 294 | 92.90% | 39.37<br>83  | Ifngr1 |

|        |       |     |        |              |     |        |              |                   |
|--------|-------|-----|--------|--------------|-----|--------|--------------|-------------------|
| 672857 | 1892  | 367 | 80.44% | 54.472<br>92 | 322 | 74.68% | 47.84<br>724 | Gm9580            |
| 73914  | 2969  | 367 | 93.53% | 34.712<br>95 | 489 | 96.09% | 46.30<br>424 | Irak3             |
| 67684  | 3327  | 367 | 87.95% | 30.977<br>69 | 360 | 84.40% | 30.42<br>088 | Luc713            |
| 99712  | 2773  | 366 | 88.78% | 37.065<br>25 | 281 | 82.01% | 28.48<br>909 | Cept1             |
| 30940  | 4432  | 366 | 88.38% | 23.190<br>87 | 304 | 83.75% | 19.28<br>395 | Usp25             |
| 12539  | 2456  | 366 | 75.08% | 41.849<br>32 | 339 | 68.77% | 38.80<br>552 | Cdc37             |
| 22031  | 6981  | 366 | 85.78% | 14.723<br>1  | 247 | 69.69% | 9.947<br>213 | Traf3             |
| 66656  | 2847  | 365 | 42.47% | 36.003<br>2  | 333 | 40.96% | 32.88<br>356 | Eef1d             |
| 23917  | 2436  | 365 | 94.87% | 42.077<br>63 | 283 | 90.52% | 32.66<br>113 | Impdh1            |
| 229473 | 4909  | 365 | 86.07% | 20.880<br>24 | 272 | 74.05% | 15.57<br>751 | D930015<br>E06Rik |
| 53382  | 2558  | 365 | 63.64% | 40.070<br>8  | 447 | 65.21% | 49.12<br>8   | Txn11             |
| 328417 | 6391  | 364 | 85.34% | 15.994<br>41 | 194 | 61.96% | 8.534<br>047 | Parp4             |
| 15200  | 2392  | 364 | 96.61% | 42.734<br>23 | 734 | 97.53% | 86.26<br>944 | Hbegf             |
| 21762  | 3092  | 364 | 79.56% | 33.059<br>6  | 341 | 76.29% | 31.00<br>538 | Psm2              |
| 20901  | 2644  | 363 | 88.58% | 38.555<br>02 | 333 | 87.56% | 35.40<br>829 | Strap             |
| 320538 | 14671 | 363 | 59.88% | 6.9483<br>65 | 352 | 58.94% | 6.745<br>359 | Ubn2              |
| 14132  | 1738  | 362 | 94.25% | 58.491<br>74 | 416 | 95.51% | 67.29<br>235 | Fcgrt             |
| 76179  | 10198 | 362 | 72.73% | 9.9684<br>88 | 224 | 54.11% | 6.175<br>258 | Usp31             |
| 11736  | 8034  | 362 | 75.55% | 12.653<br>55 | 293 | 67.30% | 10.25<br>316 | Ankfy1            |
| 328110 | 4096  | 362 | 85.25% | 24.819       | 306 | 82.30% | 21.00<br>311 | Prpf39            |
| 17859  | 5156  | 361 | 49.50% | 19.662<br>1  | 233 | 44.51% | 12.70<br>472 | Mxi1              |
| 20163  | 1412  | 361 | 99.08% | 71.797<br>32 | 365 | 98.09% | 72.67<br>42  | Rsu1              |

|                              |      |     |        |              |     |        |              |         |
|------------------------------|------|-----|--------|--------------|-----|--------|--------------|---------|
| 66511                        | 3247 | 361 | 87.65% | 31.221<br>99 | 310 | 81.98% | 26.84<br>117 | Chtop   |
| 272382                       | 2786 | 361 | 94.04% | 36.388<br>3  | 156 | 77.71% | 15.74<br>221 | Spib    |
| 73469                        | 4989 | 361 | 88.84% | 20.320<br>27 | 282 | 84.93% | 15.89<br>124 | Rnf38   |
| 56070                        | 4409 | 361 | 86.07% | 22.993<br>38 | 351 | 82.85% | 22.38<br>15  | Tcerg1  |
| 69150                        | 2442 | 360 | 89.52% | 41.399<br>26 | 320 | 91.93% | 36.84<br>058 | Snx4    |
| 19014                        | 6518 | 360 | 78.64% | 15.510<br>43 | 204 | 53.64% | 8.799<br>093 | Med1    |
| gi 94380919 ref XR_001627.1  | 7423 | 360 | 46.69% | 13.619<br>42 | 333 | 44.29% | 12.61<br>209 | -       |
| 21824                        | 3718 | 360 | 92.47% | 27.191<br>23 | 416 | 91.58% | 31.45<br>619 | Thbd    |
| 26936                        | 8784 | 360 | 51.57% | 11.509<br>22 | 314 | 52.78% | 10.04<br>985 | Mprip   |
| gi 146134345 ref NM_013822.4 | 5297 | 360 | 86.37% | 19.085<br>71 | 363 | 86.46% | 19.26<br>632 | -       |
| 22780                        | 4098 | 359 | 88.70% | 24.601<br>31 | 161 | 75.31% | 11.04<br>526 | Ikzf3   |
| 216869                       | 1728 | 359 | 93.69% | 58.342<br>69 | 327 | 98.78% | 53.20<br>178 | Arrb2   |
| 20662                        | 8919 | 359 | 70.84% | 11.303<br>53 | 257 | 63.65% | 8.101<br>008 | Sos1    |
| 80898                        | 4014 | 358 | 93.07% | 25.046<br>17 | 225 | 88.76% | 15.75<br>895 | Erap1   |
| 71752                        | 4551 | 358 | 88.11% | 22.090<br>82 | 329 | 84.18% | 20.32<br>409 | Gtf3c2  |
| 12616                        | 2809 | 358 | 83.55% | 35.790<br>44 | 334 | 86.08% | 33.42<br>85  | Cenpb   |
| 77134                        | 2678 | 358 | 86.45% | 37.541<br>2  | 340 | 85.66% | 35.69<br>361 | Hnmpa0  |
| 56356                        | 1622 | 358 | 96.18% | 61.982<br>33 | 287 | 96.73% | 49.74<br>543 | Gltp    |
| 106326                       | 4521 | 358 | 90.31% | 22.237<br>41 | 221 | 81.31% | 13.74<br>295 | Osbpl11 |
| 11610                        | 4047 | 358 | 91.67% | 24.841<br>94 | 328 | 88.07% | 22.78<br>572 | Agtrap  |
| 214627                       | 4642 | 358 | 84.83% | 21.657<br>76 | 258 | 76.52% | 15.62<br>56  | Papd5   |
| 16848                        | 2299 | 357 | 94.35% | 43.607<br>88 | 351 | 91.04% | 42.92<br>302 | Lfng    |

|                                 |      |     |        |              |     |        |              |                   |
|---------------------------------|------|-----|--------|--------------|-----|--------|--------------|-------------------|
| 21898                           | 3847 | 357 | 94.49% | 26.060<br>44 | 188 | 83.39% | 13.73<br>908 | Tlr4              |
| 20116                           | 740  | 357 | 12.30% | 135.47<br>91 | 404 | 13.11% | 153.4<br>871 | Rps8              |
| 20364                           | 722  | 356 | 95.01% | 138.46<br>77 | 381 | 92.66% | 148.3<br>576 | Sepw1             |
| 347740                          | 4930 | 356 | 45.78% | 20.278<br>64 | 284 | 45.60% | 16.19<br>547 | 2900097<br>C17Rik |
| 67003                           | 1882 | 356 | 85.92% | 53.120<br>98 | 309 | 85.33% | 46.15<br>949 | Uqcrc2            |
| 22022                           | 1830 | 356 | 94.26% | 54.630<br>43 | 315 | 93.55% | 48.39<br>289 | Tpst2             |
| 67268                           | 1779 | 355 | 65.71% | 56.038<br>71 | 409 | 68.97% | 64.63<br>526 | Myl12a            |
| 218543                          | 4063 | 355 | 87.52% | 24.536<br>76 | 301 | 83.26% | 20.82<br>772 | Srek1             |
| 18844                           | 9045 | 355 | 72.78% | 11.021<br>88 | 220 | 51.42% | 6.838<br>112 | Plxna1            |
| 58244                           | 2459 | 355 | 96.95% | 40.542<br>03 | 327 | 95.32% | 37.38<br>62  | Stx6              |
| 239667                          | 8915 | 355 | 72.22% | 11.182<br>6  | 245 | 57.42% | 7.726<br>216 | Dip2b             |
| 67016                           | 5951 | 355 | 84.29% | 16.752<br>29 | 269 | 74.74% | 12.70<br>821 | Tbc1d2b           |
| 227619                          | 3748 | 355 | 92.56% | 26.598<br>95 | 305 | 89.97% | 22.87<br>823 | Man1b1            |
| 56399                           | 3695 | 355 | 92.58% | 26.980<br>48 | 210 | 82.60% | 15.97<br>817 | Akap8             |
| 105245                          | 2639 | 355 | 93.97% | 37.776<br>76 | 257 | 95.15% | 27.37<br>889 | Txndc5            |
| 246177                          | 3307 | 355 | 94.41% | 30.146<br>01 | 262 | 94.83% | 22.27<br>354 | Myo1g             |
| gi 46391096 ref N<br>M_080561.3 | 4495 | 355 | 94.55% | 22.178<br>61 | 265 | 87.21% | 16.57<br>442 | -                 |
| 60321                           | 2722 | 355 | 94.97% | 36.624<br>86 | 304 | 94.78% | 31.39<br>84  | Wbp11             |
| gi 12963808 ref N<br>M_023742.1 | 2562 | 354 | 96.10% | 38.802<br>51 | 360 | 92.39% | 39.50<br>44  | -                 |
| 229709                          | 3866 | 354 | 86.03% | 25.714<br>44 | 297 | 81.56% | 21.59<br>816 | Ahcy11            |
| 67427                           | 502  | 354 | 54.38% | 198.03<br>19 | 342 | 54.18% | 191.5<br>334 | Rps20             |
| 59008                           | 2760 | 354 | 89.38% | 36.018<br>85 | 316 | 89.38% | 32.18<br>845 | Anapc5            |

|                                     |      |     |        |              |     |        |              |              |
|-------------------------------------|------|-----|--------|--------------|-----|--------|--------------|--------------|
| 12606                               | 2651 | 354 | 96.49% | 37.499<br>83 | 478 | 95.85% | 50.69<br>21  | Cebpα        |
| 20725                               | 3075 | 354 | 90.60% | 32.329<br>12 | 404 | 93.89% | 36.93<br>672 | Serp1b8      |
| 17428                               | 4601 | 353 | 91.74% | 21.545<br>58 | 238 | 75.61% | 14.54<br>276 | Mnt          |
| 30948                               | 2468 | 353 | 77.27% | 40.166<br>62 | 481 | 80.15% | 54.79<br>262 | Bin1         |
| 57778                               | 3873 | 353 | 88.82% | 25.595<br>46 | 211 | 76.99% | 15.31<br>641 | Fmn1         |
| 67988                               | 4611 | 352 | 84.67% | 21.437<br>95 | 288 | 82.32% | 17.55<br>98  | Tmx3         |
| 319955                              | 8422 | 352 | 64.70% | 11.737<br>16 | 212 | 50.52% | 7.076<br>895 | Ercc6        |
| 216344                              | 1856 | 352 | 90.09% | 53.259<br>91 | 314 | 90.52% | 47.56<br>35  | Rab21        |
| 227331                              | 5743 | 351 | 86.78% | 17.163<br>43 | 226 | 77.64% | 11.06<br>348 | Gigyl2       |
| 77980                               | 6268 | 351 | 84.24% | 15.725<br>84 | 300 | 72.99% | 13.45<br>595 | Sbf1         |
| 11993                               | 1527 | 351 | 95.68% | 64.551<br>12 | 420 | 91.68% | 77.32<br>722 | Aup1         |
| 97541                               | 2501 | 351 | 94.60% | 39.412<br>06 | 348 | 95.44% | 39.11<br>899 | Qars         |
| 69169                               | 1491 | 351 | 99.26% | 66.109<br>7  | 151 | 98.12% | 28.47<br>223 | Faim3        |
| 57278                               | 2407 | 350 | 97.22% | 40.834<br>54 | 372 | 95.10% | 43.44<br>992 | Bcam         |
| 66043                               | 931  | 350 | 98.50% | 105.57<br>33 | 351 | 97.21% | 105.9<br>936 | Atp5d        |
| gi 189491856 reflN<br>M_001033319.1 | 4918 | 350 | 88.90% | 19.985<br>51 | 254 | 75.50% | 14.52<br>002 | -            |
| 23886                               | 1084 | 350 | 98.34% | 90.672<br>27 | 456 | 98.43% | 118.2<br>654 | Gdf15        |
| 54161                               | 4014 | 350 | 93.52% | 24.486<br>48 | 370 | 89.64% | 25.91<br>472 | Copg         |
| 16952                               | 1395 | 350 | 95.99% | 70.457<br>88 | 461 | 97.20% | 92.90<br>709 | Anxa1        |
| 53312                               | 3455 | 350 | 83.18% | 28.448<br>26 | 239 | 80.23% | 19.44<br>787 | Nub1         |
| 20102                               | 885  | 350 | 17.29% | 111.06<br>07 | 302 | 17.29% | 95.93<br>692 | Rps4x        |
| 65963                               | 1670 | 349 | 72.93% | 58.687<br>37 | 496 | 70.06% | 83.50<br>016 | Tmem17<br>6b |

|        |      |     |        |              |     |        |              |             |
|--------|------|-----|--------|--------------|-----|--------|--------------|-------------|
| 13047  | 5023 | 349 | 53.77% | 19.511<br>83 | 287 | 41.99% | 16.06<br>352 | Cux1        |
| 18029  | 6295 | 349 | 84.62% | 15.569<br>17 | 309 | 80.05% | 13.80<br>018 | Nfic        |
| 19229  | 4039 | 349 | 90.42% | 24.265<br>39 | 289 | 84.10% | 20.11<br>621 | Ptk2b       |
| 15374  | 1384 | 348 | 97.54% | 70.612<br>06 | 404 | 97.40% | 82.06<br>678 | Hn1         |
| 16154  | 3493 | 348 | 94.65% | 27.977<br>98 | 317 | 99.03% | 25.51<br>425 | Il10ra      |
| 19170  | 1036 | 348 | 99.23% | 94.331<br>17 | 374 | 97.68% | 101.4<br>925 | Psmbl1      |
| 17084  | 997  | 347 | 97.59% | 97.739<br>48 | 455 | 97.89% | 128.3<br>035 | Ly86        |
| 66147  | 1909 | 347 | 97.07% | 51.045<br>71 | 322 | 97.49% | 47.42<br>115 | Necap2      |
| 17423  | 3907 | 347 | 90.94% | 24.941<br>45 | 222 | 83.52% | 15.97<br>466 | Ndst2       |
| 226442 | 5275 | 347 | 81.84% | 18.473<br>23 | 402 | 83.58% | 21.42<br>524 | Zfp281      |
| 100532 | 3240 | 347 | 87.10% | 30.076<br>01 | 261 | 82.13% | 22.64<br>736 | Rel1        |
| 26385  | 3013 | 346 | 90.04% | 32.248<br>73 | 234 | 87.32% | 21.83<br>428 | Grk6        |
| 109333 | 6207 | 346 | 83.49% | 15.654<br>17 | 266 | 73.19% | 12.04<br>82  | Pkn2        |
| 98193  | 3760 | 346 | 91.44% | 25.841<br>87 | 231 | 84.63% | 17.27<br>214 | Dcaf8       |
| 74136  | 4736 | 346 | 88.62% | 20.516<br>35 | 256 | 77.30% | 15.19<br>674 | Sec14l1     |
| 56696  | 2439 | 346 | 97.29% | 39.838<br>23 | 244 | 87.78% | 28.12<br>549 | Gpr132      |
| 15002  | 2670 | 345 | 93.45% | 36.286<br>37 | 174 | 83.37% | 18.32<br>146 | H2-Ob       |
| 15247  | 2795 | 345 | 91.27% | 34.663<br>55 | 275 | 89.34% | 27.66<br>133 | Hiat1       |
| 20747  | 2882 | 345 | 87.86% | 33.617<br>15 | 344 | 88.65% | 33.55<br>727 | Spop        |
| 12421  | 7046 | 345 | 73.66% | 13.750<br>3  | 279 | 63.91% | 11.13<br>227 | Rb1cc1      |
| 81004  | 8127 | 345 | 74.22% | 11.921<br>33 | 295 | 72.68% | 10.20<br>502 | Tbl1xr1     |
| 71667  | 3607 | 344 | 88.72% | 26.782<br>31 | 394 | 90.24% | 30.70<br>946 | Tmem24<br>8 |

|                                  |       |     |        |              |     |        |              |                   |
|----------------------------------|-------|-----|--------|--------------|-----|--------|--------------|-------------------|
| 71586                            | 5519  | 344 | 82.41% | 17.503<br>86 | 868 | 93.46% | 44.21<br>62  | Ifih1             |
| 59125                            | 3366  | 344 | 89.36% | 28.699<br>88 | 246 | 89.30% | 20.54<br>675 | Nek7              |
| 11863                            | 4370  | 344 | 89.91% | 22.106<br>13 | 304 | 90.16% | 19.55<br>754 | Arnt              |
| 238317                           | 7266  | 344 | 76.85% | 13.295<br>32 | 180 | 56.34% | 6.964<br>649 | C130039<br>O16Rik |
| 231803                           | 3191  | 344 | 84.49% | 30.273<br>83 | 231 | 80.48% | 20.35<br>201 | Mepce             |
| 68449                            | 3614  | 343 | 85.75% | 26.652<br>73 | 214 | 82.48% | 16.64<br>745 | Tbc1d10<br>b      |
| 215280                           | 4397  | 343 | 85.69% | 21.906<br>52 | 219 | 82.94% | 14.00<br>263 | Wipf1             |
| 53869                            | 2333  | 343 | 88.47% | 41.287<br>17 | 327 | 92.80% | 39.40<br>534 | Rab11a            |
| gi 149261515 ref X<br>R_030576.1 | 5612  | 343 | 61.58% | 17.163<br>75 | 308 | 60.14% | 15.42<br>962 | -                 |
| 19262                            | 3609  | 343 | 79.22% | 26.689<br>65 | 284 | 80.66% | 22.12<br>349 | Ptpra             |
| 56417                            | 5936  | 343 | 85.39% | 16.226<br>91 | 266 | 76.52% | 12.59<br>824 | Adar              |
| 21406                            | 4707  | 343 | 86.81% | 20.463<br>77 | 231 | 76.95% | 13.79<br>717 | Tcf12             |
| 22273                            | 1665  | 342 | 92.73% | 57.682<br>97 | 377 | 94.17% | 63.65<br>745 | Uqcr1             |
| 16518                            | 5468  | 342 | 85.22% | 17.564<br>4  | 307 | 79.28% | 15.78<br>454 | Kcnj2             |
| 224111                           | 10318 | 342 | 66.47% | 9.3082<br>13 | 183 | 48.27% | 4.986<br>292 | Ubxn7             |
| 109552                           | 2375  | 342 | 81.81% | 40.438<br>79 | 369 | 85.64% | 43.68<br>023 | Sri               |
| 70675                            | 5192  | 342 | 84.63% | 18.498<br>1  | 250 | 78.39% | 13.53<br>716 | Vcpip1            |
| gi 218749872 ref N<br>M_009067.4 | 3543  | 342 | 96.16% | 27.107<br>57 | 326 | 92.10% | 25.86<br>834 | -                 |
| 228850                           | 8366  | 342 | 78.52% | 11.480<br>05 | 189 | 58.08% | 6.351<br>35  | Ralgapb           |
| 224132                           | 4554  | 342 | 58.89% | 21.089<br>62 | 421 | 66.38% | 25.99<br>029 | Dirc2             |
| 68279                            | 2519  | 341 | 94.36% | 38.015<br>61 | 292 | 90.27% | 32.58<br>943 | Mcoln2            |
| 20200                            | 719   | 341 | 67.73% | 133.18<br>68 | 284 | 67.04% | 111.0<br>482 | S100a6            |



|        |      |     |        |              |     |        |              |               |
|--------|------|-----|--------|--------------|-----|--------|--------------|---------------|
| 13191  | 4437 | 341 | 84.70% | 21.582<br>45 | 316 | 82.31% | 20.02<br>257 | Dctn1         |
| 80911  | 3977 | 341 | 87.20% | 24.078<br>78 | 245 | 80.24% | 17.31<br>939 | Acox3         |
| 74287  | 3251 | 341 | 75.39% | 29.455<br>96 | 359 | 80.19% | 31.04<br>557 | Kcmf1         |
| 11841  | 2659 | 341 | 81.76% | 36.014<br>03 | 337 | 79.77% | 35.63<br>147 | Arf2          |
| 56418  | 2491 | 340 | 90.41% | 38.330<br>18 | 339 | 89.16% | 38.26<br>028 | Ykt6          |
| 20469  | 3868 | 339 | 86.27% | 24.612<br>12 | 255 | 85.29% | 18.53<br>428 | Sipa1         |
| 66853  | 2717 | 339 | 71.40% | 35.038<br>52 | 327 | 69.23% | 33.83<br>609 | Pnpla2        |
| 67665  | 3714 | 339 | 94.18% | 25.632<br>65 | 290 | 96.85% | 21.95<br>221 | Dctn4         |
| 16323  | 1529 | 339 | 99.48% | 62.262<br>7  | 166 | 97.71% | 30.52<br>268 | Inhba         |
| 76192  | 1967 | 339 | 92.88% | 48.398<br>4  | 353 | 91.87% | 50.45<br>364 | Abhd12        |
| 233895 | 2325 | 339 | 93.16% | 40.946<br>09 | 246 | 93.63% | 29.74<br>639 | Prr14         |
| 51786  | 5315 | 339 | 80.98% | 17.911<br>51 | 259 | 74.68% | 13.69<br>994 | Cpsf2         |
| 30877  | 1893 | 338 | 91.39% | 50.142<br>02 | 448 | 94.77% | 66.53<br>49  | Gnl3          |
| 14359  | 2339 | 338 | 92.77% | 40.580<br>95 | 267 | 91.96% | 32.09<br>247 | Fxr1          |
| 67398  | 2934 | 338 | 78.19% | 32.351<br>34 | 331 | 77.98% | 31.71<br>685 | Srpr          |
| 68089  | 2271 | 338 | 55.09% | 41.796<br>05 | 345 | 55.39% | 42.70<br>946 | Arpc4         |
| 52055  | 6156 | 338 | 81.53% | 15.418<br>91 | 250 | 73.46% | 11.41<br>73  | Rab11fip<br>5 |
| 13831  | 3895 | 338 | 86.50% | 24.369<br>41 | 326 | 84.65% | 23.53<br>056 | Epc1          |
| 434341 | 6945 | 338 | 81.99% | 13.667<br>22 | 205 | 49.52% | 8.298<br>579 | Nlrc5         |
| 75292  | 5887 | 338 | 82.25% | 16.123<br>46 | 273 | 71.97% | 13.03<br>739 | Prkd3         |
| 22213  | 1982 | 338 | 97.58% | 47.890<br>43 | 317 | 99.24% | 44.96<br>532 | Ube2g2        |
| 67241  | 5603 | 337 | 81.51% | 16.890<br>6  | 248 | 71.07% | 12.44<br>38  | Smc6          |

|        |      |     |        |              |     |        |              |         |
|--------|------|-----|--------|--------------|-----|--------|--------------|---------|
| 78798  | 5445 | 337 | 84.30% | 17.380<br>72 | 194 | 71.63% | 10.01<br>673 | Eml4    |
| 110750 | 3604 | 337 | 91.45% | 26.259<br>16 | 239 | 76.55% | 18.64<br>383 | Cse11   |
| 74442  | 5791 | 337 | 85.44% | 16.342<br>26 | 394 | 85.55% | 19.12<br>779 | Sgms2   |
| 12912  | 8431 | 337 | 67.57% | 11.225       | 286 | 65.90% | 9.536<br>94  | Creb1   |
| 84652  | 5652 | 336 | 80.57% | 16.694<br>48 | 280 | 65.38% | 13.92<br>765 | Fam126a |
| 229279 | 5242 | 336 | 54.14% | 18.000<br>23 | 322 | 54.73% | 17.26<br>955 | Hnrnpa3 |
| 53323  | 4866 | 336 | 57.36% | 19.391<br>12 | 379 | 59.45% | 21.89<br>723 | Ube2k   |
| 12519  | 1701 | 335 | 89.42% | 55.306<br>5  | 222 | 84.13% | 36.69<br>195 | Cd80    |
| 54343  | 4543 | 335 | 88.71% | 20.707<br>98 | 304 | 80.12% | 18.81<br>278 | Atf7ip  |
| 432486 | 5204 | 335 | 87.82% | 18.077<br>7  | 180 | 65.62% | 9.724<br>277 | Gnptab  |
| 22720  | 4034 | 335 | 88.25% | 23.320<br>86 | 223 | 85.08% | 15.54<br>143 | Zfp62   |
| 211401 | 4975 | 335 | 86.59% | 18.909<br>82 | 203 | 76.72% | 11.47<br>163 | Mtss1   |
| 24086  | 5475 | 335 | 59.98% | 17.182<br>9  | 267 | 55.49% | 13.71<br>037 | Tlk2    |
| 17463  | 1616 | 335 | 91.09% | 58.215<br>57 | 311 | 93.19% | 54.10<br>547 | Psmc7   |
| 75416  | 2702 | 335 | 97.37% | 34.817<br>31 | 291 | 95.08% | 30.27<br>818 | Nop14   |
| 12763  | 9727 | 335 | 61.51% | 9.6716<br>73 | 249 | 57.59% | 7.196<br>852 | Cmah    |
| 80985  | 5612 | 335 | 81.27% | 16.763<br>43 | 258 | 70.56% | 12.92<br>481 | Trim44  |
| 20911  | 2703 | 334 | 84.98% | 34.700<br>53 | 323 | 89.53% | 33.59<br>531 | Stxbp2  |
| 606496 | 2276 | 334 | 79.66% | 41.210<br>69 | 282 | 77.37% | 34.83<br>365 | Gsk3a   |
| 98053  | 1720 | 334 | 98.60% | 54.532<br>29 | 382 | 99.77% | 62.43<br>916 | Gtf2f1  |
| 67916  | 3162 | 334 | 93.90% | 29.663<br>36 | 310 | 91.68% | 27.56<br>271 | Ppap2b  |
| 66830  | 4332 | 334 | 79.48% | 21.651<br>79 | 265 | 73.36% | 17.19<br>806 | Nacc1   |

|                                  |      |     |        |              |     |        |              |                   |
|----------------------------------|------|-----|--------|--------------|-----|--------|--------------|-------------------|
| gi 141802760 ref N<br>M_133858.3 | 2795 | 334 | 92.09% | 33.558<br>33 | 247 | 83.83% | 24.84<br>49  | -                 |
| 52615                            | 4449 | 334 | 85.19% | 21.082<br>39 | 246 | 75.95% | 15.54<br>515 | Suz12             |
| 71665                            | 2523 | 333 | 82.96% | 37.064<br>89 | 315 | 73.33% | 35.10<br>067 | Fuca1             |
| 23790                            | 3436 | 333 | 94.38% | 27.216<br>16 | 339 | 93.68% | 27.73<br>759 | Coro1c            |
| 67075                            | 4524 | 332 | 85.50% | 20.608<br>73 | 329 | 85.10% | 20.44<br>539 | Magt1             |
| 56469                            | 3855 | 332 | 94.63% | 24.185<br>18 | 298 | 93.67% | 21.73<br>272 | Pias1             |
| 21974                            | 5652 | 332 | 80.94% | 16.495<br>73 | 257 | 70.28% | 12.78<br>36  | Top2b             |
| 277250                           | 7112 | 332 | 77.94% | 13.109<br>38 | 182 | 60.76% | 7.194<br>519 | Kdm3b             |
| 14236                            | 5101 | 332 | 88.55% | 18.277<br>57 | 336 | 80.34% | 18.51<br>851 | Foxn2             |
| 216157                           | 2223 | 332 | 86.86% | 41.940<br>57 | 248 | 83.49% | 31.36<br>421 | ORF61             |
| 240613                           | 8026 | 331 | 72.05% | 11.581<br>49 | 236 | 61.71% | 8.266<br>753 | 9930021<br>J03Rik |
| 100226                           | 2320 | 331 | 96.72% | 40.065<br>98 | 285 | 94.57% | 34.53<br>655 | Stx12             |
| 16852                            | 817  | 331 | 86.78% | 113.77<br>36 | 209 | 68.79% | 71.91<br>945 | Lgals1            |
| 19899                            | 708  | 331 | 44.07% | 131.28<br>96 | 337 | 53.81% | 133.8<br>193 | Rpl18             |
| 17079                            | 2326 | 331 | 98.15% | 39.962<br>62 | 313 | 97.46% | 37.83<br>178 | Cd180             |
| 110157                           | 3066 | 331 | 84.08% | 30.317<br>37 | 301 | 83.01% | 27.60<br>047 | Raf1              |
| 53621                            | 5622 | 331 | 44.72% | 16.533<br>81 | 299 | 43.69% | 14.95<br>211 | Cnot4             |
| 21939                            | 1784 | 331 | 92.04% | 52.103<br>73 | 388 | 95.46% | 61.14<br>472 | Cd40              |
| 23856                            | 8473 | 331 | 72.31% | 10.970<br>5  | 278 | 69.07% | 9.224<br>221 | Dido1             |
| 226976                           | 4663 | 331 | 87.86% | 19.934<br>18 | 267 | 81.88% | 16.09<br>785 | Kans13            |
| 70361                            | 3576 | 331 | 90.52% | 25.993<br>59 | 326 | 91.95% | 25.62<br>962 | Lman1             |
| 12229                            | 2535 | 331 | 93.37% | 36.667<br>87 | 217 | 90.89% | 24.06<br>6   | Btk               |

|        |      |     |        |              |     |        |              |               |
|--------|------|-----|--------|--------------|-----|--------|--------------|---------------|
| 110147 | 4026 | 330 | 86.59% | 23.018<br>44 | 273 | 76.60% | 19.06<br>387 | Ehmt2         |
| 74763  | 2439 | 330 | 92.62% | 37.996       | 273 | 92.91% | 31.46<br>828 | Nat15         |
| 20091  | 960  | 330 | 23.75% | 96.533<br>58 | 323 | 28.75% | 94.59<br>178 | Rps3a         |
| 52502  | 2849 | 330 | 77.61% | 32.527<br>99 | 322 | 77.47% | 31.77<br>5   | Carhsp1       |
| 229694 | 5547 | 330 | 83.16% | 16.706<br>73 | 398 | 86.98% | 20.17<br>191 | AI50443<br>2  |
| 56447  | 1672 | 330 | 96.05% | 55.425<br>98 | 313 | 99.28% | 52.62<br>961 | Copz1         |
| 68796  | 2762 | 330 | 94.06% | 33.552<br>58 | 308 | 93.88% | 31.35<br>084 | Tmem21<br>4   |
| 20773  | 3754 | 330 | 80.02% | 24.686<br>26 | 244 | 67.21% | 18.27<br>333 | Sptlc2        |
| 56348  | 1839 | 330 | 94.29% | 50.392<br>73 | 300 | 98.42% | 45.86<br>291 | Hsd17b1<br>2  |
| 18475  | 4241 | 329 | 89.79% | 21.785<br>29 | 317 | 91.02% | 21.01<br>421 | Pafah1b2      |
| 16859  | 1586 | 329 | 91.87% | 58.254<br>36 | 401 | 94.07% | 71.08<br>26  | Lgals9        |
| 330474 | 6107 | 329 | 83.12% | 15.128<br>77 | 224 | 69.15% | 10.31<br>198 | Zc3h4         |
| 65970  | 4245 | 329 | 81.18% | 21.764<br>76 | 353 | 82.85% | 23.37<br>863 | Lima1         |
| 66306  | 4475 | 329 | 78.77% | 20.646<br>13 | 238 | 70.12% | 14.95<br>223 | Fam53c        |
| 71648  | 2413 | 329 | 96.68% | 38.289<br>02 | 329 | 97.85% | 38.33<br>193 | Optn          |
| 14455  | 2554 | 329 | 71.06% | 36.175<br>18 | 317 | 70.60% | 34.89<br>478 | Gas5          |
| 22319  | 2115 | 329 | 98.11% | 43.683<br>88 | 365 | 95.13% | 48.51<br>819 | Vamp3         |
| 67070  | 2724 | 329 | 95.89% | 33.917<br>55 | 285 | 93.43% | 29.41<br>439 | Lsm14a        |
| 28088  | 1979 | 329 | 98.13% | 46.685<br>91 | 278 | 93.13% | 39.49<br>309 | D10Wsu<br>52e |
| 12848  | 3250 | 328 | 85.60% | 28.341<br>72 | 323 | 89.38% | 27.94<br>096 | Cops2         |
| 74645  | 2054 | 328 | 98%    | 44.844<br>49 | 179 | 92.21% | 24.50<br>049 | Fam46c        |
| 20621  | 2919 | 328 | 95.07% | 31.555<br>53 | 147 | 75.51% | 14.15<br>811 | Snn           |

|        |      |     |        |              |     |        |              |                   |
|--------|------|-----|--------|--------------|-----|--------|--------------|-------------------|
| 75974  | 6665 | 328 | 77.09% | 13.820<br>04 | 279 | 69.21% | 11.76<br>864 | Dock11            |
| 72278  | 2966 | 328 | 94.40% | 31.055<br>49 | 374 | 91.34% | 35.45<br>052 | Ccpg1             |
| 28015  | 2265 | 327 | 88.34% | 40.542<br>94 | 240 | 88.92% | 29.78<br>963 | Polr2m            |
| 217995 | 6776 | 327 | 76.59% | 13.552<br>21 | 278 | 69.70% | 11.53<br>436 | Heatr1            |
| 117146 | 5191 | 327 | 79.73% | 17.690<br>19 | 254 | 67.39% | 13.75<br>64  | Ube3b             |
| 17156  | 7960 | 327 | 76.70% | 11.536<br>4  | 262 | 67.44% | 9.253<br>592 | Man1a2            |
| 93679  | 3262 | 327 | 84.76% | 28.151<br>37 | 255 | 76.03% | 21.97<br>75  | Trim8             |
| 18704  | 8042 | 327 | 76.24% | 11.418<br>77 | 228 | 59.85% | 7.970<br>635 | Pik3c2a           |
| 24068  | 1097 | 327 | 94.07% | 83.709<br>9  | 357 | 95.44% | 91.49<br>212 | Sra1              |
| 217218 | 3723 | 326 | 85.15% | 24.590<br>1  | 226 | 79.37% | 17.06<br>623 | Atxn7l3           |
| 213438 | 3044 | 326 | 89.16% | 30.075<br>21 | 323 | 88.24% | 29.83<br>184 | A630033<br>H2ORik |
| 18822  | 3268 | 326 | 88.71% | 28.013<br>75 | 347 | 90.76% | 29.85<br>173 | Plod1             |
| 68795  | 8109 | 326 | 68.75% | 11.289<br>79 | 224 | 56.06% | 7.766<br>097 | Ubr3              |
| 74203  | 3730 | 325 | 87.96% | 24.468<br>66 | 245 | 77.67% | 18.46<br>628 | Eif4enif1         |
| 12053  | 3326 | 325 | 90.50% | 27.440<br>8  | 283 | 90.53% | 23.92<br>138 | Bcl6              |
| 228994 | 3199 | 325 | 89.65% | 28.530<br>2  | 303 | 92.75% | 26.62<br>873 | Ythdf1            |
| 20535  | 4202 | 325 | 89.34% | 21.720<br>16 | 241 | 83.82% | 16.12<br>438 | Slc4a2            |
| 233208 | 4195 | 325 | 90.94% | 21.756<br>4  | 218 | 84.46% | 14.60<br>988 | Scaf1             |
| 72047  | 4028 | 325 | 88.31% | 22.658<br>42 | 229 | 77.93% | 15.98<br>336 | Ddx42             |
| 18607  | 7175 | 324 | 81.92% | 12.681<br>16 | 192 | 65.24% | 7.523<br>18  | Pdpk1             |
| 67938  | 939  | 324 | 83.71% | 96.898<br>07 | 395 | 88.07% | 118.2<br>643 | Myl12b            |
| 67231  | 1936 | 324 | 99.64% | 46.997<br>57 | 208 | 92.98% | 30.20<br>509 | Tbc1d20           |

|        |       |     |        |              |     |        |              |              |
|--------|-------|-----|--------|--------------|-----|--------|--------------|--------------|
| 223255 | 2575  | 324 | 57.01% | 35.334<br>87 | 270 | 55.84% | 29.47<br>872 | Stk24        |
| 19243  | 4153  | 324 | 33.66% | 21.908<br>81 | 500 | 33.20% | 33.84<br>778 | Ptp4a1       |
| 237943 | 6844  | 324 | 82.22% | 13.294<br>46 | 199 | 70.25% | 8.174<br>575 | Gpatch8      |
| 50930  | 1862  | 324 | 97.21% | 48.865<br>35 | 520 | 98.71% | 78.51<br>376 | Tnfsf14      |
| 19260  | 2734  | 324 | 96.23% | 33.279<br>92 | 144 | 83.39% | 14.80<br>765 | Ptpn22       |
| 22217  | 4274  | 324 | 86.80% | 21.288<br>56 | 266 | 79.93% | 17.49<br>723 | Usp12        |
| 11737  | 2105  | 323 | 84.89% | 43.090<br>96 | 322 | 86.98% | 43.00<br>569 | Anp32a       |
| 83925  | 10210 | 323 | 29.88% | 8.8840<br>81 | 293 | 28.62% | 8.067<br>965 | Trps1        |
| 20454  | 2448  | 323 | 86.36% | 37.053<br>29 | 412 | 82.97% | 47.31<br>599 | St3gal5      |
| 107271 | 2874  | 323 | 83.61% | 31.561<br>05 | 284 | 86.88% | 27.78<br>137 | Yars         |
| 26409  | 5763  | 323 | 83.26% | 15.739<br>45 | 268 | 77.39% | 13.07<br>399 | Map3k7       |
| 71817  | 1117  | 323 | 97.58% | 81.205<br>43 | 262 | 97.40% | 65.94<br>323 | Tmem50<br>a  |
| 19330  | 2257  | 323 | 93.35% | 40.188<br>95 | 296 | 93.49% | 36.87<br>078 | Rab18        |
| 30957  | 5596  | 323 | 80.52% | 16.209<br>16 | 229 | 72.28% | 11.50<br>482 | Mapk8ip<br>3 |
| 15568  | 6030  | 323 | 70.35% | 15.042<br>53 | 363 | 61.11% | 16.92<br>433 | Elavl1       |
| 69237  | 2579  | 323 | 96.36% | 35.171<br>18 | 369 | 95.54% | 40.22<br>51  | Gtpbp4       |
| 12175  | 2429  | 323 | 93.50% | 37.343<br>13 | 264 | 92.05% | 30.55<br>614 | Bnip2        |
| 227800 | 4967  | 322 | 84.28% | 18.205<br>28 | 202 | 72.08% | 11.43<br>35  | Rabgap1      |
| 67776  | 4157  | 322 | 84.72% | 21.752<br>62 | 219 | 77.92% | 14.81<br>106 | Vwa5a        |
| 74551  | 3400  | 322 | 88.09% | 26.595<br>78 | 238 | 84.76% | 19.67<br>978 | Pck2         |
| 216963 | 3670  | 322 | 89.56% | 24.639<br>14 | 255 | 81.53% | 19.53<br>423 | Git1         |
| 14423  | 3996  | 322 | 86.79% | 22.629<br>04 | 285 | 86.09% | 20.05<br>125 | Galnt1       |

|        |      |     |        |              |      |        |              |                   |
|--------|------|-----|--------|--------------|------|--------|--------------|-------------------|
| 66588  | 1880 | 322 | 80.80% | 48.098<br>74 | 301  | 81.65% | 45.01<br>225 | Cmpk1             |
| 74155  | 3034 | 321 | 93.11% | 29.711<br>54 | 1019 | 96.61% | 94.42<br>364 | Errfi1            |
| 233103 | 5808 | 321 | 82.32% | 15.520<br>8  | 223  | 72.09% | 10.79<br>445 | 4931406<br>P16Rik |
| 226016 | 2475 | 321 | 95.64% | 36.422<br>15 | 305  | 83.19% | 34.64<br>549 | Fam108b           |
| 69683  | 1855 | 321 | 92.40% | 48.595<br>59 | 304  | 90.78% | 46.07<br>356 | Emc10             |
| 56440  | 2079 | 321 | 93.22% | 43.359<br>7  | 279  | 87.35% | 37.72<br>87  | Snx1              |
| 70769  | 3652 | 321 | 81.19% | 24.683<br>68 | 273  | 80.97% | 21.01<br>619 | Nolc1             |
| 217203 | 2301 | 320 | 97.04% | 39.054<br>32 | 262  | 96.57% | 32.01<br>156 | Tmem10<br>6a      |
| 12488  | 5427 | 320 | 86.83% | 16.558<br>69 | 243  | 78.92% | 12.58<br>834 | Cd2ap             |
| 21426  | 1779 | 320 | 93.82% | 50.513<br>77 | 331  | 95.39% | 52.30<br>873 | Tfec              |
| 14225  | 1657 | 320 | 95.11% | 54.232<br>94 | 336  | 92.64% | 57.00<br>84  | Fkbp1a            |
| 11363  | 1892 | 320 | 96.25% | 47.496<br>82 | 267  | 95.98% | 39.67<br>457 | Acadl             |
| 13805  | 3572 | 320 | 84.24% | 25.157<br>89 | 390  | 94.62% | 30.69<br>554 | Eng               |
| 26395  | 2387 | 320 | 91.87% | 37.647<br>25 | 385  | 94.68% | 45.34<br>511 | Map2k1            |
| 227525 | 4082 | 320 | 62.22% | 22.014<br>7  | 250  | 54.85% | 17.21<br>825 | Delre1c           |
| 74200  | 2999 | 319 | 91.10% | 29.871<br>01 | 282  | 86.86% | 26.43<br>594 | 2810403<br>A07Rik |
| 99326  | 3387 | 319 | 89.43% | 26.449<br>12 | 432  | 92.18% | 35.85<br>838 | Garnl3            |
| 67367  | 3809 | 319 | 82.59% | 23.518<br>81 | 241  | 75.66% | 17.78<br>804 | Gcfc1             |
| 67869  | 1424 | 319 | 88.48% | 62.909<br>52 | 269  | 94.80% | 53.10<br>855 | Paip2             |
| 14420  | 3723 | 318 | 93.85% | 23.986<br>66 | 279  | 89.39% | 21.06<br>848 | Galc              |
| 228361 | 5329 | 318 | 90.26% | 16.757<br>8  | 244  | 76.73% | 12.87<br>26  | Ambra1            |
| 237436 | 6748 | 318 | 28.88% | 13.233<br>9  | 347  | 28.62% | 14.45<br>694 | Gas2l3            |

|                                 |       |     |        |              |     |        |              |             |
|---------------------------------|-------|-----|--------|--------------|-----|--------|--------------|-------------|
| 26406                           | 3161  | 318 | 96.24% | 28.251<br>29 | 230 | 92.28% | 20.45<br>622 | Map3k3      |
| 68112                           | 2195  | 318 | 92.30% | 40.684<br>44 | 299 | 81.55% | 38.29<br>647 | Sdccag3     |
| 77573                           | 4114  | 318 | 94.73% | 21.706<br>94 | 241 | 79.75% | 16.46<br>929 | Vps33a      |
| 17972                           | 1463  | 318 | 97.61% | 61.040<br>56 | 267 | 98.70% | 51.30<br>847 | Ncf4        |
| 241296                          | 4254  | 317 | 90.15% | 20.926<br>54 | 223 | 83.64% | 14.73<br>769 | Lrrc8a      |
| 1E+08                           | 12530 | 317 | 18.31% | 7.1046<br>7  | 368 | 19.66% | 8.256<br>935 | Gm1782<br>1 |
| 21672                           | 942   | 316 | 96.71% | 94.204<br>55 | 307 | 98.41% | 91.62<br>407 | Prdx2       |
| gi 54292131 ref N<br>M_177420.1 | 2129  | 316 | 43.54% | 41.681<br>86 | 285 | 44.48% | 37.63<br>495 | -           |
| 238799                          | 5391  | 316 | 77.96% | 16.460<br>9  | 228 | 67.26% | 11.89<br>016 | Tnpol       |
| 56453                           | 4393  | 316 | 87.30% | 20.200<br>48 | 244 | 76.42% | 15.61<br>531 | Mbtps1      |
| 233016                          | 865   | 315 | 90.75% | 102.26<br>57 | 441 | 93.76% | 143.3<br>325 | Blvrb       |
| 226856                          | 7069  | 315 | 80.69% | 12.513<br>77 | 180 | 55.92% | 7.158<br>741 | Lpgat1      |
| 12985                           | 1363  | 315 | 93.32% | 64.900<br>85 | 959 | 99.34% | 197.8<br>085 | Csf3        |
| 18139                           | 6385  | 315 | 82.27% | 13.854<br>32 | 184 | 58.73% | 8.101<br>754 | Zfml        |
| 432731                          | 3990  | 315 | 83.78% | 22.170<br>39 | 185 | 70.63% | 13.03<br>53  | Zfp187      |
| 57738                           | 4007  | 314 | 70.90% | 22.006<br>25 | 180 | 66.83% | 12.62<br>918 | Slc15a2     |
| 13858                           | 5193  | 314 | 83.46% | 16.980<br>37 | 237 | 75.47% | 12.83<br>075 | Eps15       |
| 12946                           | 1674  | 314 | 93.31% | 52.675<br>65 | 316 | 87.10% | 53.07<br>057 | Cr11        |
| 237256                          | 4093  | 313 | 90.62% | 21.475<br>25 | 250 | 80.94% | 17.17<br>198 | Zc3h12d     |
| 218756                          | 7389  | 313 | 69.24% | 11.895<br>82 | 303 | 72.55% | 11.52<br>867 | Slc4a7      |
| 18141                           | 4766  | 313 | 82.58% | 18.442<br>76 | 280 | 85.65% | 16.51<br>681 | Nup50       |
| 227720                          | 8195  | 313 | 71.86% | 10.725<br>83 | 196 | 56.66% | 6.724<br>024 | Nup214      |



|        |       |     |        |              |      |        |              |          |
|--------|-------|-----|--------|--------------|------|--------|--------------|----------|
| 242521 | 4217  | 313 | 83.38% | 20.843<br>78 | 271  | 80.86% | 18.06<br>707 | Klh9     |
| 71712  | 2807  | 313 | 93.69% | 31.313<br>93 | 291  | 90.31% | 29.14<br>558 | Dram1    |
| 17184  | 4472  | 313 | 44.81% | 19.655<br>24 | 324  | 41.91% | 20.36<br>879 | Matr3    |
| 18080  | 9675  | 312 | 68.23% | 9.0560<br>61 | 289  | 60.60% | 8.397<br>867 | Nin      |
| 338355 | 4363  | 312 | 89.87% | 20.081<br>91 | 217  | 75.34% | 13.98<br>288 | Fkbp15   |
| 245944 | 4712  | 312 | 84.97% | 18.594<br>52 | 238  | 74.58% | 14.20<br>018 | Vps54    |
| 18787  | 3024  | 312 | 94.64% | 28.974       | 2438 | 99.34% | 226.6<br>596 | Serpine1 |
| 72017  | 1626  | 312 | 98.03% | 53.885<br>23 | 322  | 97.05% | 55.67<br>464 | Cyb5r1   |
| 19072  | 2768  | 311 | 94.47% | 31.552<br>23 | 206  | 86.60% | 20.92<br>297 | Prep     |
| 52551  | 1966  | 311 | 97.81% | 44.423<br>48 | 313  | 96.74% | 44.75<br>926 | Sgta     |
| 53610  | 2468  | 311 | 67.42% | 35.387<br>59 | 295  | 68.56% | 33.60<br>462 | Nono     |
| 109880 | 9728  | 311 | 69.97% | 8.9778<br>54 | 232  | 53.38% | 6.704<br>811 | Braf     |
| 19230  | 2973  | 311 | 88.70% | 29.376<br>58 | 291  | 80.02% | 27.51<br>821 | Twf1     |
| 20610  | 2493  | 310 | 69.84% | 34.920<br>07 | 268  | 69.47% | 30.22<br>28  | Sumo3    |
| 19334  | 1909  | 310 | 99.16% | 45.602<br>8  | 313  | 93.92% | 46.09<br>571 | Rab22a   |
| 67420  | 3972  | 309 | 86.78% | 21.846<br>65 | 198  | 82.60% | 14.01<br>451 | Far1     |
| 320191 | 12836 | 309 | 57.53% | 6.7602<br>77 | 197  | 42.34% | 4.314<br>78  | Hook3    |
| 1E+08  | 4898  | 309 | 37.44% | 17.716<br>4  | 384  | 36.44% | 22.04<br>117 | Gm4122   |
| 20463  | 1169  | 309 | 54.32% | 74.230<br>04 | 352  | 50.81% | 84.65<br>454 | Cox7a2l  |
| 320560 | 9833  | 309 | 66.81% | 8.8248<br>67 | 186  | 50.11% | 5.318<br>008 | Dennd5b  |
| 320139 | 3264  | 309 | 78.83% | 26.585<br>45 | 322  | 78.52% | 27.73<br>498 | Ptpn7    |
| 238247 | 5780  | 309 | 74.52% | 15.012<br>96 | 254  | 66.99% | 12.35<br>458 | Arid4a   |

|                                  |       |     |        |              |     |        |              |         |
|----------------------------------|-------|-----|--------|--------------|-----|--------|--------------|---------|
| 73379                            | 6487  | 309 | 79.03% | 13.376<br>74 | 268 | 69.71% | 11.61<br>483 | Dcbld2  |
| 72344                            | 5609  | 308 | 84.19% | 15.420<br>59 | 332 | 80.89% | 16.64<br>082 | Usp36   |
| gi 103472008 ref N<br>M_021455.3 | 3167  | 308 | 71.08% | 27.311<br>05 | 328 | 71.30% | 29.11<br>709 | -       |
| 81018                            | 3001  | 308 | 69.01% | 28.821<br>76 | 202 | 68.94% | 18.92<br>376 | Rnf114  |
| 18720                            | 2553  | 308 | 95.89% | 33.879<br>39 | 261 | 95.97% | 28.74<br>166 | Pip5k1a |
| 76299                            | 2647  | 308 | 77.37% | 32.676<br>27 | 303 | 75.71% | 32.18<br>184 | Erp44   |
| 78757                            | 9328  | 308 | 68.79% | 9.2725<br>22 | 173 | 50.23% | 5.214<br>104 | Rictor  |
| 19186                            | 977   | 308 | 93.14% | 88.530<br>29 | 314 | 96.62% | 90.35<br>604 | Psmel   |
| 18711                            | 11255 | 308 | 61.43% | 7.6849<br>48 | 178 | 43.62% | 4.446<br>278 | Pikfyve |
| 17533                            | 5322  | 307 | 83.82% | 16.199<br>41 | 162 | 63.81% | 8.557<br>803 | Mrc1    |
| 229445                           | 3453  | 307 | 64.09% | 24.967<br>64 | 264 | 62.90% | 21.49<br>46  | Ctso    |
| 12339                            | 3562  | 307 | 92.25% | 24.203<br>61 | 292 | 83.41% | 23.04<br>682 | Capn7   |
| 26410                            | 2507  | 307 | 86.68% | 34.389<br>02 | 339 | 91.14% | 38.01<br>609 | Map3k8  |
| 217718                           | 5403  | 307 | 79.22% | 15.956<br>55 | 224 | 69.24% | 11.65<br>561 | Nek9    |
| 71607                            | 1434  | 307 | 93.31% | 60.120<br>83 | 260 | 96.79% | 50.97<br>372 | Snx20   |
| 56354                            | 2312  | 307 | 82.09% | 37.289<br>47 | 251 | 79.89% | 30.52<br>165 | Dnajc7  |
| 68436                            | 617   | 306 | 37.28% | 139.27<br>46 | 378 | 40.52% | 172.2<br>379 | Rpl34   |
| 56501                            | 5847  | 306 | 64.22% | 14.696<br>84 | 265 | 59.81% | 12.74<br>192 | Elf4    |
| 71934                            | 2299  | 306 | 96.78% | 37.378<br>18 | 207 | 91.52% | 25.31<br>358 | Car13   |
| 66711                            | 1495  | 306 | 94.31% | 57.479<br>89 | 368 | 95.45% | 69.20<br>361 | Sbds    |
| 93871                            | 8547  | 306 | 67.06% | 10.054<br>11 | 237 | 54.38% | 7.795<br>729 | Brwd1   |
| 13819                            | 5352  | 306 | 47.25% | 16.056<br>14 | 253 | 43.61% | 13.29<br>005 | Epas1   |

|                                  |      |     |        |              |     |        |              |                |
|----------------------------------|------|-----|--------|--------------|-----|--------|--------------|----------------|
| 74315                            | 4279 | 305 | 27.46% | 20.016<br>74 | 157 | 18.18% | 10.31<br>524 | Rnf145         |
| 268936                           | 5973 | 305 | 75.41% | 14.339<br>8  | 291 | 72.61% | 13.69<br>691 | Brpf3          |
| 228829                           | 5752 | 305 | 87.48% | 14.890<br>75 | 271 | 82.18% | 13.24<br>563 | Phf20          |
| 98752                            | 1727 | 305 | 93.80% | 49.595<br>61 | 244 | 87.32% | 39.72<br>095 | Fcrla          |
| gi 23956395 ref N<br>M_153592.1  | 3892 | 305 | 91.39% | 22.007<br>09 | 243 | 85.25% | 17.55<br>317 | -              |
| 382423                           | 3607 | 305 | 92.82% | 23.745<br>94 | 261 | 87.08% | 20.34<br>307 | Atxn7l3b       |
| 59003                            | 2128 | 305 | 95.21% | 40.249<br>82 | 216 | 94.17% | 28.53<br>673 | Maca           |
| 72477                            | 4631 | 305 | 86.74% | 18.495<br>27 | 167 | 72.01% | 10.13<br>827 | Tmem87<br>b    |
| 74185                            | 2846 | 304 | 94.98% | 29.996<br>76 | 409 | 95.75% | 40.40<br>271 | Gbe1           |
| 23807                            | 3924 | 304 | 82.24% | 21.756<br>06 | 317 | 83.74% | 22.71<br>184 | Arih2          |
| gi 146198669 ref N<br>M_178606.4 | 3023 | 304 | 94.57% | 28.240<br>42 | 256 | 86.57% | 23.80<br>806 | -              |
| 22146                            | 1977 | 304 | 25.95% | 43.181<br>99 | 425 | 33.89% | 60.43<br>721 | Tuba1c         |
| 16656                            | 9021 | 304 | 73.27% | 9.4635<br>62 | 174 | 53.13% | 5.422<br>714 | Hivep3         |
| 12798                            | 1800 | 304 | 94.78% | 47.428<br>22 | 153 | 91.39% | 23.89<br>687 | Cnn2           |
| 74120                            | 3242 | 304 | 93.34% | 26.332<br>75 | 273 | 82.67% | 23.67<br>401 | Zfp263         |
| 71435                            | 6974 | 304 | 78.08% | 12.241<br>29 | 223 | 67.75% | 8.989<br>697 | Arhgap2<br>1   |
| gi 22122536 ref N<br>M_146047.1  | 2058 | 304 | 97.04% | 41.482<br>4  | 244 | 93.25% | 33.33<br>24  | -              |
| 19134                            | 4482 | 304 | 88.13% | 19.047<br>48 | 210 | 83.58% | 13.17<br>254 | Prpf4b         |
| 12775                            | 1975 | 304 | 94.84% | 43.225<br>72 | 174 | 90.63% | 24.76<br>876 | Ccr7           |
| 105787                           | 4655 | 304 | 86.49% | 18.339<br>59 | 201 | 76.22% | 12.13<br>944 | Prkaa1         |
| 226178                           | 3946 | 303 | 89.74% | 21.563<br>6  | 219 | 82.29% | 15.60<br>304 | D19Wsu<br>162e |
| 15254                            | 576  | 303 | 96.01% | 147.72<br>56 | 282 | 98.26% | 137.6<br>413 | Hint1          |

|                                  |      |     |        |              |     |        |              |         |
|----------------------------------|------|-----|--------|--------------|-----|--------|--------------|---------|
| 17085                            | 2449 | 303 | 96.04% | 34.744<br>78 | 250 | 92.12% | 28.69<br>943 | Ly9     |
| 18749                            | 4341 | 303 | 85.83% | 19.601<br>47 | 259 | 83.02% | 16.77<br>382 | Prkacb  |
| 74451                            | 2298 | 303 | 97.21% | 37.027<br>83 | 313 | 88.47% | 38.29<br>274 | Pgs1    |
| 228359                           | 3113 | 303 | 81.66% | 27.333<br>75 | 242 | 75.01% | 21.85<br>538 | Arhgap1 |
| 110532                           | 6649 | 302 | 79.20% | 12.755<br>17 | 374 | 81.40% | 15.81<br>384 | Adarb1  |
| 20467                            | 4117 | 302 | 69.47% | 20.599<br>74 | 309 | 64.12% | 21.10<br>084 | Sin3b   |
| 224903                           | 3183 | 302 | 78.51% | 26.644<br>4  | 276 | 80.02% | 24.37<br>78  | Safb    |
| 19159                            | 4073 | 302 | 81.86% | 20.822<br>28 | 246 | 76.63% | 16.98<br>02  | Cyth3   |
| 11772                            | 4639 | 302 | 85.90% | 18.281<br>77 | 263 | 83.08% | 15.93<br>872 | Ap2a2   |
| 17909                            | 8098 | 302 | 75.75% | 10.472<br>85 | 190 | 55.63% | 6.596<br>263 | Myo10   |
| 68095                            | 3344 | 302 | 45.90% | 25.361<br>58 | 313 | 31.04% | 26.31<br>481 | Ociad1  |
| gi 262231795 ref N<br>M_175251.3 | 9031 | 302 | 66.21% | 9.3908<br>91 | 248 | 57.27% | 7.720<br>367 | -       |
| 65098                            | 1658 | 302 | 87.94% | 51.151<br>47 | 261 | 86.91% | 44.25<br>661 | Zfand6  |
| 74569                            | 4607 | 301 | 85.80% | 18.347<br>8  | 258 | 85.48% | 15.74<br>431 | Ttc17   |
| 212898                           | 4243 | 301 | 86.83% | 19.921<br>83 | 340 | 85.22% | 22.52<br>828 | Dse     |
| 54723                            | 3549 | 301 | 86.17% | 23.817<br>5  | 274 | 85.55% | 21.70<br>534 | Tfip11  |
| 68631                            | 1410 | 300 | 96.60% | 59.749<br>99 | 427 | 98.79% | 85.13<br>946 | Cryl1   |
| 66366                            | 1297 | 300 | 98.84% | 64.955<br>66 | 388 | 99.15% | 84.10<br>346 | Ergic3  |
| 54381                            | 2013 | 300 | 82.96% | 41.851<br>71 | 286 | 89.52% | 39.94<br>334 | Pgcp    |
| 226169                           | 5244 | 300 | 84.40% | 16.065<br>5  | 319 | 78.76% | 17.10<br>213 | Pprc1   |
| 57741                            | 2785 | 300 | 68.26% | 30.250<br>44 | 319 | 69.23% | 32.20<br>235 | Noc2l   |
| 27967                            | 3820 | 300 | 90.99% | 22.054<br>32 | 199 | 85.03% | 14.64<br>576 | Cherp   |

|                              |       |     |        |              |     |        |              |         |
|------------------------------|-------|-----|--------|--------------|-----|--------|--------------|---------|
| 109154                       | 5970  | 299 | 75.28% | 14.064<br>77 | 197 | 67.87% | 9.277<br>138 | Mlec    |
| 76178                        | 3862  | 299 | 88.81% | 21.741<br>76 | 220 | 80.92% | 16.01<br>521 | Coa5    |
| 14719                        | 2345  | 299 | 97.87% | 35.806<br>68 | 270 | 98.64% | 32.37<br>002 | Got2    |
| 242860                       | 5562  | 299 | 78.48% | 15.096<br>49 | 350 | 77.96% | 17.69<br>128 | Rsb11   |
| 71521                        | 4146  | 299 | 82.56% | 20.252<br>45 | 160 | 66.74% | 10.84<br>958 | Pds5a   |
| 78783                        | 4443  | 299 | 92.30% | 18.898<br>64 | 221 | 83.41% | 13.98<br>421 | Brpf1   |
| 243958                       | 2484  | 299 | 89.01% | 33.803       | 158 | 79.67% | 17.88<br>247 | Siglegc |
| 68524                        | 7589  | 299 | 72.09% | 11.064<br>26 | 267 | 65.28% | 9.891<br>196 | Wipf2   |
| 17449                        | 1958  | 298 | 72.37% | 42.740<br>47 | 294 | 64.91% | 42.21<br>402 | Mdh1    |
| 14390                        | 5004  | 298 | 78.70% | 16.723<br>79 | 197 | 70.58% | 11.06<br>805 | Gabpa   |
| 320213                       | 6352  | 298 | 84.19% | 13.174<br>72 | 163 | 63.16% | 7.214<br>384 | Senp5   |
| 64602                        | 5808  | 298 | 78.72% | 14.408<br>72 | 213 | 64.50% | 10.31<br>039 | Ireb2   |
| gi 261878573 ref NM_133797.3 | 2673  | 298 | 89.45% | 31.307<br>83 | 255 | 82.34% | 26.82<br>028 | -       |
| 27403                        | 6607  | 297 | 74.59% | 12.623<br>73 | 189 | 58.59% | 8.042<br>288 | Abca7   |
| 66471                        | 3273  | 297 | 88.30% | 25.482<br>74 | 275 | 85.85% | 23.62<br>157 | Anp32e  |
| 17274                        | 2012  | 297 | 86.53% | 41.453<br>78 | 277 | 88.77% | 38.70<br>561 | Rab8a   |
| 194388                       | 10907 | 297 | 59.98% | 7.6469<br>25 | 237 | 55.40% | 6.108<br>93  | Tet3    |
| 83997                        | 4501  | 297 | 85.29% | 18.530<br>33 | 250 | 80.83% | 15.61<br>54  | Slmap   |
| 207214                       | 6552  | 297 | 53.74% | 12.729<br>7  | 287 | 50.31% | 12.31<br>488 | Larp4   |
| 103236                       | 2436  | 296 | 87.27% | 34.123<br>23 | 242 | 81.40% | 27.92<br>931 | Csnk1g2 |
| 14609                        | 3105  | 296 | 94.24% | 26.771<br>08 | 112 | 76.10% | 10.14<br>095 | Gja1    |
| 1E+08                        | 2468  | 296 | 51.01% | 33.680<br>79 | 338 | 51.05% | 38.50<br>292 | Gm3781  |

|                              |       |     |        |              |     |        |              |                   |
|------------------------------|-------|-----|--------|--------------|-----|--------|--------------|-------------------|
| 70568                        | 5646  | 296 | 83.56% | 14.722<br>67 | 207 | 69.61% | 10.30<br>746 | Cpne3             |
| 21843                        | 4292  | 296 | 67.57% | 19.367<br>24 | 251 | 58.20% | 16.44<br>13  | Tial1             |
| 381921                       | 5270  | 295 | 73.19% | 15.719<br>8  | 192 | 65.75% | 10.24<br>266 | Taok2             |
| 117150                       | 3374  | 295 | 88.77% | 24.553<br>46 | 201 | 85.57% | 16.74<br>839 | Pip4k2c           |
| 55989                        | 1976  | 295 | 91.09% | 41.924<br>78 | 378 | 94.18% | 53.78<br>077 | Nop58             |
| 21888                        | 4555  | 295 | 78.81% | 18.187<br>35 | 260 | 82.77% | 16.04<br>749 | Tle4              |
| 270066                       | 7043  | 295 | 69.02% | 11.762<br>51 | 238 | 60.50% | 9.500<br>389 | Slc35e1           |
| 232288                       | 5043  | 295 | 78.09% | 16.427<br>4  | 304 | 79.99% | 16.94<br>754 | Frmd4b            |
| 239985                       | 11325 | 295 | 51.46% | 7.3150<br>87 | 276 | 45.38% | 6.851<br>616 | Arid1b            |
| 74781                        | 3913  | 295 | 94.12% | 21.171<br>32 | 280 | 88.50% | 20.11<br>733 | Wipi2             |
| 69617                        | 3547  | 295 | 86.07% | 23.355<br>9  | 253 | 84.27% | 20.05<br>31  | Pitrm1            |
| 20787                        | 4299  | 295 | 87.69% | 19.270<br>38 | 176 | 73.44% | 11.50<br>979 | Srebfl            |
| gi 141803417 ref NM_172691.2 | 2961  | 295 | 88.38% | 27.978<br>17 | 273 | 91.59% | 25.92<br>068 | -                 |
| 14605                        | 2149  | 295 | 78.32% | 38.549<br>73 | 170 | 71.29% | 22.23<br>999 | Tsc22d3           |
| 27261                        | 1546  | 295 | 98.64% | 53.585<br>62 | 238 | 98.97% | 43.28<br>023 | Dok3              |
| 26400                        | 3556  | 294 | 86.33% | 23.217<br>81 | 252 | 80.60% | 19.92<br>328 | Map2k7            |
| 72055                        | 4592  | 294 | 78.92% | 17.979<br>65 | 233 | 69.73% | 14.26<br>514 | Slc38a10          |
| 78425                        | 2747  | 294 | 75.14% | 30.055<br>53 | 268 | 65.56% | 27.42<br>826 | 9530053<br>H05Rik |
| 218397                       | 5101  | 294 | 73.77% | 16.185<br>56 | 279 | 66.61% | 15.37<br>698 | Rasa1             |
| 74334                        | 5308  | 294 | 84.98% | 15.554<br>36 | 184 | 68.31% | 9.745<br>61  | Ranbp10           |
| 230789                       | 3058  | 294 | 89.21% | 26.998<br>87 | 253 | 92.48% | 23.25<br>976 | Fam76a            |
| 12520                        | 1534  | 294 | 95.31% | 53.821<br>73 | 381 | 94.33% | 69.82<br>673 | Cd81              |

|                                  |       |     |        |              |     |        |              |                   |
|----------------------------------|-------|-----|--------|--------------|-----|--------|--------------|-------------------|
| 56215                            | 4751  | 294 | 42.05% | 17.377<br>93 | 184 | 41.55% | 10.88<br>817 | Acin1             |
| gi 113195699 ref N<br>M_010700.2 | 4531  | 293 | 87.93% | 18.159<br>73 | 380 | 91.94% | 23.57<br>825 | -                 |
| 56389                            | 2128  | 293 | 85.67% | 38.666<br>22 | 252 | 88.06% | 33.29<br>285 | Stx5a             |
| 56433                            | 991   | 293 | 97.17% | 83.028<br>97 | 282 | 96.47% | 80.00<br>14  | Vps29             |
| 107975                           | 4361  | 293 | 83.81% | 18.867<br>63 | 252 | 79.09% | 16.24<br>563 | Pacs1             |
| 67808                            | 1756  | 293 | 94.48% | 46.857<br>47 | 251 | 94.13% | 40.18<br>568 | Tprgl             |
| 381990                           | 3227  | 293 | 80.76% | 25.497<br>9  | 269 | 78.68% | 23.43<br>557 | Zbtb2             |
| 11980                            | 8175  | 292 | 64.61% | 10.030<br>69 | 262 | 63.22% | 9.010<br>225 | Atp8a1            |
| 68041                            | 2059  | 292 | 91.26% | 39.825<br>59 | 227 | 92.18% | 30.99<br>5   | Mid1ip1           |
| 71853                            | 2125  | 292 | 41.93% | 38.588<br>65 | 325 | 43.06% | 42.99<br>783 | Pdia6             |
| gi 146141185 ref N<br>M_029561.3 | 2276  | 292 | 90.55% | 36.028<br>51 | 345 | 94.11% | 42.61<br>563 | -                 |
| 223739                           | 5032  | 291 | 82.11% | 16.240<br>08 | 240 | 75.95% | 13.40<br>889 | 5031439<br>G07Rik |
| 71436                            | 4537  | 291 | 13.67% | 18.011<br>92 | 455 | 14%    | 28.19<br>452 | Flrt3             |
| 100383                           | 2684  | 291 | 93.03% | 30.447<br>12 | 243 | 89.72% | 25.45<br>34  | Bsdcl             |
| 71732                            | 3194  | 291 | 96.34% | 25.585<br>49 | 238 | 94.11% | 20.94<br>904 | Vps11             |
| 13498                            | 4426  | 291 | 75.92% | 18.463<br>64 | 206 | 73.25% | 13.08<br>513 | Atn1              |
| 56392                            | 4116  | 291 | 82.09% | 19.854<br>24 | 196 | 83.92% | 13.38<br>76  | Shoc2             |
| 73233                            | 33831 | 291 | 14.70% | 2.4155<br>38 | 265 | 12.70% | 2.202<br>182 | Zfp942            |
| 14567                            | 2657  | 291 | 89.57% | 30.756<br>52 | 196 | 87.69% | 20.73<br>894 | Gdi1              |
| 20443                            | 2059  | 291 | 90.87% | 39.689<br>2  | 340 | 90.24% | 46.42<br>423 | St3gal4           |
| 216810                           | 5000  | 291 | 84.10% | 16.344<br>01 | 227 | 72.98% | 12.76<br>374 | Tom1l2            |
| 108946                           | 7601  | 290 | 65.73% | 10.714<br>28 | 240 | 56.28% | 8.876<br>927 | Zzz3              |

|                                  |      |     |        |              |     |        |              |         |
|----------------------------------|------|-----|--------|--------------|-----|--------|--------------|---------|
| 19654                            | 3991 | 290 | 83.04% | 20.405<br>72 | 185 | 73.49% | 13.03<br>203 | Rbm6    |
| 328108                           | 6434 | 290 | 77.34% | 12.657<br>64 | 230 | 65.09% | 10.05<br>007 | Fam179b |
| 15467                            | 2805 | 290 | 88.48% | 29.033<br>6  | 287 | 85.56% | 28.76<br>545 | Eif2ak1 |
| 13859                            | 3397 | 290 | 86.49% | 23.973<br>87 | 249 | 80.69% | 20.60<br>753 | Eps1511 |
| 67054                            | 2394 | 289 | 81.95% | 33.900<br>76 | 257 | 82.58% | 30.18<br>082 | Paics   |
| gi 291327469 ref N<br>M_010585.4 | 9875 | 289 | 64.08% | 8.2185<br>74 | 175 | 47.23% | 4.982<br>222 | -       |
| 27419                            | 2504 | 289 | 91.85% | 32.411<br>51 | 286 | 92.97% | 32.11<br>1   | Naglu   |
| 16970                            | 2313 | 289 | 94.03% | 35.087<br>94 | 249 | 93.30% | 30.26<br>536 | Lrmp    |
| 18786                            | 6815 | 289 | 48.83% | 11.908<br>79 | 233 | 46.02% | 9.611<br>965 | Plaa    |
| 320487                           | 7761 | 288 | 71.45% | 10.421<br>03 | 253 | 57.05% | 9.164<br>841 | Heatr5a |
| 72552                            | 3183 | 288 | 93.12% | 25.409<br>23 | 218 | 85.77% | 19.25<br>493 | Hsd11   |
| 77110                            | 3550 | 288 | 76.45% | 22.782<br>42 | 219 | 68.62% | 17.34<br>355 | Gpbp111 |
| 12861                            | 533  | 288 | 94.18% | 151.74<br>03 | 340 | 93.81% | 179.3<br>386 | Cox6a1  |
| 72399                            | 3727 | 288 | 91.23% | 21.700<br>45 | 255 | 84.60% | 19.23<br>547 | Brap    |
| 64340                            | 4190 | 288 | 88.35% | 19.302<br>53 | 226 | 81.24% | 15.16<br>41  | Dhx38   |
| 93695                            | 3798 | 287 | 60.29% | 21.220<br>84 | 113 | 57.21% | 8.364<br>608 | Gpnmb   |
| 223453                           | 1481 | 287 | 90.88% | 54.420<br>5  | 226 | 96.35% | 42.90<br>18  | Dap     |
| 98878                            | 3387 | 287 | 86.30% | 23.795<br>92 | 286 | 85.92% | 23.73<br>958 | Ehd4    |
| 12014                            | 8493 | 287 | 68.88% | 9.4897<br>87 | 175 | 50.39% | 5.792<br>94  | Bach2   |
| 22381                            | 1018 | 287 | 91.16% | 79.171<br>67 | 286 | 92.93% | 78.98<br>423 | Wbp5    |
| 72993                            | 6961 | 287 | 72.73% | 11.578<br>33 | 241 | 69.27% | 9.733<br>466 | Appl1   |
| 19708                            | 2690 | 287 | 87.84% | 29.961<br>62 | 238 | 82.75% | 24.87<br>407 | Dpf2    |



|                                 |       |     |        |              |     |        |              |         |
|---------------------------------|-------|-----|--------|--------------|-----|--------|--------------|---------|
| 268448                          | 4412  | 286 | 80.39% | 18.203<br>98 | 171 | 71.71% | 10.89<br>639 | Phf12   |
| 319468                          | 6413  | 286 | 76.30% | 12.523<br>93 | 299 | 79.99% | 13.10<br>787 | Ppm1h   |
| 231238                          | 4532  | 286 | 84.75% | 17.721<br>96 | 234 | 77.38% | 14.51<br>604 | Sel113  |
| 12290                           | 12697 | 286 | 54.48% | 6.3255<br>84 | 86  | 22.90% | 1.904<br>23  | Cacna1e |
| 212285                          | 7363  | 286 | 69.66% | 10.908<br>05 | 154 | 44.68% | 5.880<br>145 | Arap2   |
| 66427                           | 4294  | 286 | 81.25% | 18.704<br>22 | 203 | 74.13% | 13.29<br>095 | Cyb5b   |
| 94280                           | 2974  | 286 | 83.73% | 27.006<br>03 | 237 | 82.08% | 22.40<br>42  | Sfxn3   |
| 67561                           | 3821  | 286 | 72.62% | 21.019<br>61 | 233 | 73.20% | 17.14<br>356 | Wdr48   |
| gi 31981212 ref N<br>M_021878.2 | 4939  | 286 | 89.88% | 16.261<br>58 | 207 | 71.69% | 11.78<br>293 | -       |
| 23959                           | 3580  | 285 | 90.98% | 22.356<br>18 | 327 | 91.01% | 25.67<br>952 | Nt5e    |
| 214987                          | 2942  | 285 | 82.56% | 27.204<br>32 | 212 | 79.23% | 20.25<br>887 | Chtf8   |
| 26914                           | 1978  | 285 | 85.49% | 40.462<br>65 | 266 | 90.39% | 37.80<br>746 | H2afy   |
| 245860                          | 3764  | 285 | 95.48% | 21.263<br>31 | 293 | 92.69% | 21.88<br>468 | Atg9a   |
| 114741                          | 4491  | 285 | 71.43% | 17.821<br>22 | 256 | 65.53% | 16.02<br>577 | Supt16h |
| 19941                           | 564   | 285 | 30.85% | 141.90<br>62 | 386 | 38.83% | 192.4<br>112 | Rpl26   |
| 192160                          | 3764  | 285 | 89.35% | 21.263<br>31 | 242 | 85.84% | 18.07<br>54  | Casc3   |
| 107022                          | 2611  | 284 | 88.32% | 30.545<br>5  | 200 | 80.01% | 21.53<br>502 | Gramd3  |
| 56095                           | 2865  | 284 | 95.04% | 27.837<br>45 | 228 | 87.19% | 22.37<br>342 | Ftsj3   |
| 12929                           | 3863  | 284 | 87.73% | 20.645<br>69 | 159 | 75.36% | 11.57<br>163 | Crkl    |
| 228608                          | 2280  | 284 | 86.80% | 34.979<br>95 | 209 | 91.67% | 25.77<br>114 | Smox    |
| 414084                          | 3769  | 284 | 74.90% | 21.160<br>6  | 355 | 79.09% | 26.48<br>039 | Tnip3   |
| 20227                           | 5091  | 283 | 52.48% | 15.610<br>58 | 257 | 48.44% | 14.19<br>228 | Sart1   |

|        |      |     |        |              |     |        |              |                   |
|--------|------|-----|--------|--------------|-----|--------|--------------|-------------------|
| 16803  | 2528 | 283 | 74.45% | 31.437<br>29 | 506 | 74.49% | 56.27<br>242 | Lbp               |
| 15931  | 4988 | 283 | 74.44% | 15.932<br>93 | 258 | 76.34% | 14.54<br>171 | Ids               |
| 53619  | 2099 | 283 | 93.95% | 37.862<br>54 | 315 | 94%    | 42.19<br>104 | Blcap             |
| 225888 | 6131 | 283 | 74.33% | 12.962<br>56 | 206 | 71.52% | 9.446<br>219 | Suv420h<br>1      |
| 16418  | 1495 | 283 | 86.15% | 53.159<br>51 | 339 | 78.80% | 63.75<br>006 | Eif6              |
| 67921  | 1363 | 282 | 83.86% | 58.101<br>72 | 321 | 86.79% | 66.21<br>117 | Ube2f             |
| 320351 | 1205 | 282 | 95.10% | 65.720<br>03 | 348 | 89.38% | 81.19<br>22  | Tmem25<br>1       |
| 17222  | 8967 | 282 | 67.49% | 8.8315<br>65 | 164 | 46.68% | 5.141<br>843 | Anapc1            |
| 66412  | 3903 | 282 | 88.93% | 20.290<br>2  | 230 | 82.99% | 16.56<br>729 | Arrdc4            |
| 14590  | 1340 | 282 | 90.90% | 59.098<br>98 | 386 | 90.22% | 80.98<br>501 | Ggh               |
| 22330  | 5229 | 281 | 86.12% | 15.091<br>19 | 228 | 66.95% | 12.25<br>853 | Vcl               |
| 75909  | 2773 | 281 | 77.75% | 28.457<br>2  | 262 | 76.38% | 26.56<br>278 | Vmp1              |
| 23939  | 2945 | 281 | 94.16% | 26.795<br>18 | 242 | 91.17% | 23.10<br>214 | Mapk7             |
| 78521  | 4691 | 281 | 82.65% | 16.821<br>96 | 196 | 73.84% | 11.74<br>662 | B230219<br>D22Rik |
| 23880  | 2677 | 281 | 91.89% | 29.477<br>7  | 320 | 92.64% | 33.60<br>653 | Fyb               |
| 64143  | 2293 | 281 | 89.01% | 34.414<br>22 | 339 | 89.32% | 41.56<br>404 | Ralb              |
| 102294 | 2930 | 281 | 95.19% | 26.932<br>36 | 276 | 91.16% | 26.48<br>278 | Cyp4v3            |
| 67006  | 2885 | 280 | 94.80% | 27.255<br>11 | 268 | 94.56% | 26.11<br>627 | Cisd2             |
| 78891  | 2637 | 280 | 95.15% | 29.818<br>35 | 277 | 89.69% | 29.53<br>193 | Scyl1             |
| 14265  | 4412 | 280 | 78.15% | 17.822<br>07 | 244 | 77.56% | 15.54<br>807 | Fmr1              |
| 94093  | 8868 | 279 | 58.55% | 8.8351<br>56 | 167 | 50.14% | 5.294<br>353 | Trim33            |
| 18624  | 1856 | 279 | 97.14% | 42.214<br>53 | 264 | 96.07% | 39.98<br>969 | Pept              |

|                                 |      |     |        |              |     |        |              |              |
|---------------------------------|------|-----|--------|--------------|-----|--------|--------------|--------------|
| 213054                          | 8703 | 279 | 73.55% | 9.0026<br>62 | 179 | 52.91% | 5.782<br>374 | Gabpb2       |
| 207521                          | 5786 | 279 | 72.76% | 13.541<br>34 | 220 | 62.95% | 10.68<br>972 | Dtx4         |
| 226151                          | 6880 | 279 | 77.67% | 11.388<br>11 | 159 | 56.90% | 6.497<br>268 | Fam178a      |
| 207278                          | 4432 | 279 | 87.61% | 17.678<br>29 | 77  | 50.05% | 4.884<br>421 | Fchsd2       |
| 98221                           | 1230 | 278 | 93.98% | 63.471<br>01 | 293 | 92.52% | 66.97<br>067 | Eif3m        |
| 83796                           | 2767 | 278 | 91.76% | 28.214<br>43 | 205 | 78.53% | 20.82<br>892 | Smarcd2      |
| 217866                          | 6718 | 278 | 74.52% | 11.620<br>92 | 213 | 61.57% | 8.913<br>776 | Cdc42bp<br>b |
| gi 22122584 ref N<br>M_146083.1 | 2304 | 278 | 71.57% | 33.884<br>26 | 342 | 73.87% | 41.73<br>167 | -            |
| 106583                          | 4892 | 278 | 76.23% | 15.958<br>57 | 182 | 69.64% | 10.45<br>941 | Scaf8        |
| gi 28076934 ref N<br>M_027151.1 | 1653 | 278 | 97.58% | 47.228<br>88 | 294 | 98.55% | 50.00<br>306 | -            |
| 78825                           | 4214 | 278 | 84.58% | 18.526<br>18 | 184 | 75.87% | 12.27<br>568 | Desi2        |
| 101314                          | 1110 | 278 | 91.71% | 70.332<br>74 | 333 | 91.17% | 84.34<br>19  | Brk1         |
| 16650                           | 5711 | 277 | 83.28% | 13.620<br>82 | 176 | 69.85% | 8.664<br>083 | Kpna6        |
| 30945                           | 4276 | 277 | 87.02% | 18.191<br>89 | 242 | 81.48% | 15.91<br>108 | Rnf19a       |
| 29809                           | 6338 | 277 | 70.97% | 12.273<br>35 | 135 | 45.38% | 5.988<br>301 | Rabgap1<br>l |
| 11433                           | 1425 | 277 | 89.05% | 54.588<br>43 | 312 | 88.28% | 61.55<br>479 | Acp5         |
| 56205                           | 2276 | 277 | 95.43% | 34.177<br>73 | 214 | 91.12% | 26.43<br>405 | Ensa         |
| 330260                          | 1850 | 277 | 96.86% | 42.047<br>85 | 246 | 93.41% | 37.38<br>398 | Pon2         |
| 268783                          | 4518 | 277 | 88.84% | 17.217<br>47 | 175 | 79.11% | 10.88<br>965 | Mtmr12       |
| 67959                           | 1929 | 277 | 96.22% | 40.325<br>82 | 301 | 92.22% | 43.86<br>886 | Puf60        |
| 215114                          | 7883 | 277 | 73.08% | 9.8678<br>82 | 262 | 66.08% | 9.343<br>98  | Hip1         |
| 66967                           | 6604 | 276 | 76.44% | 11.736<br>48 | 216 | 64.85% | 9.195<br>361 | Edem3        |

|                              |      |     |        |              |     |        |              |         |
|------------------------------|------|-----|--------|--------------|-----|--------|--------------|---------|
| 12017                        | 1365 | 276 | 85.27% | 56.782<br>19 | 234 | 86.59% | 48.19<br>537 | Bag1    |
| 16194                        | 3343 | 276 | 91.65% | 23.185<br>07 | 307 | 90.85% | 25.81<br>809 | Il6ra   |
| 14068                        | 1868 | 276 | 97.86% | 41.492<br>34 | 178 | 92.93% | 26.78<br>954 | F7      |
| 20024                        | 3321 | 276 | 49.80% | 23.338<br>66 | 253 | 36.19% | 21.41<br>775 | Sub1    |
| 11834                        | 4900 | 276 | 86.84% | 15.817<br>9  | 204 | 68.31% | 11.70<br>459 | Aqr     |
| 65020                        | 3549 | 276 | 84.84% | 21.839<br>3  | 217 | 81.88% | 17.19        | Zfp110  |
| 66997                        | 1723 | 276 | 88.86% | 44.984<br>15 | 312 | 96.92% | 50.90<br>863 | Psm12   |
| 109161                       | 2952 | 276 | 88.28% | 26.255<br>99 | 265 | 88.52% | 25.23<br>781 | Ube2q2  |
| 23970                        | 3732 | 276 | 75.51% | 20.768<br>41 | 223 | 74.68% | 16.79<br>907 | Pacsin2 |
| 12268                        | 5427 | 276 | 4.35%  | 14.281<br>87 | 374 | 4.83%  | 19.37<br>465 | C4b     |
| 72584                        | 5079 | 275 | 85.39% | 15.205<br>13 | 201 | 69.66% | 11.12<br>602 | Cul4b   |
| 52635                        | 5556 | 275 | 76.66% | 13.899<br>72 | 182 | 64.87% | 9.209<br>399 | Esyt2   |
| 76820                        | 4872 | 275 | 81.71% | 15.851<br>16 | 214 | 78.92% | 12.34<br>891 | Fam49a  |
| 56420                        | 1332 | 275 | 90.84% | 57.978<br>13 | 286 | 90.32% | 60.36<br>482 | Ppp4c   |
| 66205                        | 1257 | 275 | 86.32% | 61.437<br>44 | 278 | 87.03% | 62.17<br>727 | Cd302   |
| 233900                       | 4172 | 275 | 83.65% | 18.510<br>75 | 230 | 74.26% | 15.49<br>907 | Rnf40   |
| 102247                       | 3944 | 275 | 80.81% | 19.580<br>85 | 209 | 76.60% | 14.89<br>812 | Agpat6  |
| 78826                        | 2827 | 275 | 90.24% | 27.317<br>6  | 110 | 73.61% | 10.93<br>929 | P2ry10  |
| 69900                        | 3172 | 275 | 84.68% | 24.346<br>43 | 230 | 78.47% | 20.38<br>528 | Mfsd11  |
| 18674                        | 1512 | 275 | 52.05% | 51.075<br>97 | 314 | 52.45% | 58.38<br>482 | Slc25a3 |
| gi 118130140 ref NM_153515.3 | 3385 | 275 | 95.13% | 22.814<br>44 | 166 | 81.09% | 13.78<br>706 | -       |
| 54196                        | 1793 | 274 | 88.34% | 42.914<br>69 | 334 | 88.68% | 52.37<br>069 | Pabpn1  |

|                                 |      |     |        |              |     |        |              |                   |
|---------------------------------|------|-----|--------|--------------|-----|--------|--------------|-------------------|
| 241633                          | 5529 | 274 | 83.83% | 13.916<br>81 | 143 | 66.65% | 7.271<br>292 | Atp8b4            |
| 20729                           | 4136 | 274 | 55.95% | 18.603<br>97 | 302 | 57.18% | 20.52<br>809 | Spin1             |
| 12799                           | 2548 | 274 | 87.68% | 30.198<br>6  | 178 | 81.04% | 19.64<br>005 | Cnp               |
| 57317                           | 2254 | 274 | 89.40% | 34.137<br>55 | 240 | 83.23% | 29.93<br>501 | Srsf4             |
| 19988                           | 1282 | 274 | 10.45% | 60.020<br>31 | 281 | 10.53% | 61.62<br>266 | Rpl6              |
| 27225                           | 3070 | 274 | 85.67% | 25.063<br>86 | 267 | 84.76% | 24.45<br>091 | Ddx24             |
| 231128                          | 4600 | 273 | 85.28% | 16.666<br>35 | 230 | 80.33% | 14.05<br>698 | Fam193a           |
| 74112                           | 2926 | 273 | 86.47% | 26.201<br>37 | 260 | 84.79% | 24.98<br>165 | Usp16             |
| 23879                           | 3002 | 273 | 88.81% | 25.538<br>05 | 252 | 82.91% | 23.6         | Fxr2              |
| 76308                           | 1835 | 273 | 96.68% | 41.779<br>41 | 278 | 94.22% | 42.59<br>228 | Rab1b             |
| 99152                           | 3021 | 273 | 83.91% | 25.377<br>43 | 184 | 84.41% | 17.12<br>337 | Anapc2            |
| 68598                           | 1410 | 273 | 92.48% | 54.372<br>49 | 344 | 87.94% | 68.59<br>01  | Dnajc8            |
| 67830                           | 1518 | 273 | 94.40% | 50.504<br>09 | 218 | 91.37% | 40.37<br>447 | Rer1              |
| 67302                           | 6151 | 273 | 86.21% | 12.463<br>86 | 273 | 78.95% | 12.47<br>783 | Zc3h13            |
| 76014                           | 3814 | 273 | 80.96% | 20.101       | 224 | 77.08% | 16.51<br>161 | Zc3h18            |
| 66367                           | 2648 | 273 | 88.97% | 28.952<br>12 | 251 | 87.76% | 26.64<br>881 | 2310022<br>A10Rik |
| 67163                           | 3270 | 272 | 85.14% | 23.359<br>14 | 194 | 78.81% | 16.67<br>923 | Ccdc47            |
| gi 32451487 ref N<br>M_026101.2 | 3857 | 272 | 83.17% | 19.804<br>09 | 186 | 76.38% | 13.55<br>768 | -                 |
| 14159                           | 2780 | 272 | 96.94% | 27.476<br>4  | 302 | 95.83% | 30.54<br>107 | Fes               |
| 213499                          | 5943 | 272 | 84%    | 12.852<br>83 | 151 | 66.23% | 7.143<br>209 | Fbxo42            |
| 107951                          | 3389 | 272 | 64.56% | 22.538<br>92 | 239 | 62.32% | 19.82<br>661 | Cdk9              |
| 68050                           | 2383 | 272 | 77.38% | 32.053<br>88 | 268 | 75.45% | 31.61<br>789 | Akirin1           |

|                             |       |     |        |              |     |        |              |        |
|-----------------------------|-------|-----|--------|--------------|-----|--------|--------------|--------|
| 53334                       | 4265  | 272 | 89.10% | 17.909<br>59 | 191 | 82.84% | 12.59<br>031 | Gosr1  |
| 13665                       | 3152  | 272 | 57.68% | 24.233<br>63 | 288 | 52.63% | 25.68<br>789 | Eif2s1 |
| gi 75750500 ref NM_023910.5 | 2333  | 272 | 91.51% | 32.740<br>84 | 190 | 86.93% | 22.89<br>607 | -      |
| 214459                      | 5346  | 271 | 84.06% | 14.235<br>61 | 197 | 66.55% | 10.35<br>999 | Fnbp11 |
| 432572                      | 6676  | 271 | 69.22% | 11.399<br>58 | 228 | 67.96% | 9.601<br>534 | Specc1 |
| 68970                       | 3454  | 271 | 92.65% | 22.033<br>46 | 208 | 86.25% | 16.93<br>024 | Dcaf12 |
| 432508                      | 6534  | 271 | 74.58% | 11.647<br>32 | 204 | 62.40% | 8.777<br>547 | Cpsf6  |
| 74018                       | 6681  | 271 | 69.68% | 11.391<br>04 | 157 | 56.52% | 6.606<br>635 | Als2   |
| 21664                       | 1953  | 271 | 83.26% | 38.967<br>52 | 784 | 84.38% | 112.8<br>589 | Phlda1 |
| 22661                       | 9431  | 271 | 59.16% | 8.0695<br>12 | 163 | 48.99% | 4.859<br>057 | Zfp148 |
| 54353                       | 1656  | 270 | 96.86% | 45.786<br>68 | 288 | 96.68% | 48.89<br>385 | Skap2  |
| 60504                       | 2607  | 270 | 95.40% | 29.084<br>29 | 199 | 87.73% | 21.46<br>022 | Ii21r  |
| 20851                       | 5255  | 270 | 76.69% | 14.428<br>69 | 159 | 60.32% | 8.506<br>414 | Stat5b |
| 70144                       | 5918  | 270 | 63.77% | 12.812<br>22 | 166 | 52.60% | 7.885<br>972 | Lrch3  |
| 225358                      | 3359  | 270 | 74.75% | 22.573<br>01 | 184 | 67.73% | 15.40<br>033 | Fam13b |
| 71389                       | 10573 | 270 | 61.27% | 7.1713<br>55 | 150 | 43.59% | 3.988<br>551 | Chd6   |
| 94184                       | 3224  | 270 | 89.83% | 23.518<br>22 | 226 | 85.17% | 19.70<br>768 | Pdxdc1 |
| 56307                       | 4990  | 270 | 54.33% | 15.194<br>94 | 311 | 58.40% | 17.52<br>193 | Metap2 |
| 67784                       | 6913  | 270 | 69.88% | 10.968<br>14 | 144 | 53.61% | 5.856<br>229 | Plxd1  |
| 22404                       | 4327  | 269 | 76.10% | 17.458<br>27 | 194 | 69.84% | 12.60<br>483 | Wiz    |
| 72238                       | 5617  | 269 | 83.21% | 13.448<br>8  | 181 | 66.85% | 9.059<br>334 | Tbc1d5 |
| 230895                      | 13080 | 269 | 50.32% | 5.7753<br>76 | 196 | 36.70% | 4.212<br>796 | Vps13d |

|        |      |     |        |              |     |        |              |          |
|--------|------|-----|--------|--------------|-----|--------|--------------|----------|
| 66932  | 5249 | 269 | 75.84% | 14.391<br>68 | 204 | 67.35% | 10.92<br>637 | Rexo1    |
| 76479  | 2125 | 269 | 90.16% | 35.549<br>14 | 304 | 94.92% | 40.21<br>951 | Smndc1   |
| 269003 | 4015 | 269 | 87.90% | 18.814<br>92 | 191 | 80.97% | 13.37<br>427 | Sap130   |
| 66810  | 2079 | 269 | 94.42% | 36.335<br>7  | 255 | 97.31% | 34.48<br>322 | Rbm22    |
| 27410  | 6453 | 268 | 72.73% | 11.662<br>96 | 217 | 63.78% | 9.454<br>1   | Abca3    |
| 67979  | 2813 | 268 | 89.83% | 26.754<br>74 | 188 | 86.99% | 18.78<br>928 | Atad1    |
| 11771  | 3457 | 268 | 84.18% | 21.770<br>64 | 183 | 72.95% | 14.88<br>243 | Ap2a1    |
| 211548 | 4277 | 268 | 87.73% | 17.596<br>7  | 280 | 87.56% | 18.40<br>522 | Nomo1    |
| 65973  | 6688 | 268 | 52.38% | 11.253<br>15 | 184 | 45.66% | 7.734<br>704 | Asph     |
| 54644  | 2505 | 268 | 88.18% | 30.044<br>35 | 247 | 84.11% | 27.72<br>116 | Otud5    |
| 15239  | 2908 | 268 | 92.16% | 25.880<br>7  | 243 | 90.23% | 23.49<br>276 | Hgs      |
| 66700  | 2592 | 268 | 94.02% | 29.035<br>91 | 272 | 91.44% | 29.50<br>231 | Chmp3    |
| 54391  | 2482 | 268 | 88.72% | 30.322<br>76 | 312 | 92.95% | 35.34<br>068 | Rfk      |
| 98758  | 2548 | 268 | 24.65% | 29.537<br>32 | 269 | 24.80% | 29.68<br>076 | Hnrnpf   |
| 21391  | 1992 | 268 | 96.69% | 37.781<br>67 | 319 | 96.34% | 45.02<br>186 | Tbxas1   |
| 192170 | 1489 | 268 | 87.31% | 50.544<br>72 | 273 | 84.69% | 51.54<br>542 | Eif4a3   |
| 67529  | 2828 | 267 | 94.24% | 26.513<br>53 | 229 | 88.97% | 22.76<br>555 | Fgfr1op2 |
| 110323 | 505  | 267 | 88.71% | 148.47<br>58 | 314 | 88.71% | 174.8<br>076 | Cox6b1   |
| 15452  | 1349 | 267 | 94.89% | 55.582<br>11 | 249 | 89.84% | 51.89<br>309 | Hprt     |
| 100465 | 2882 | 267 | 91.57% | 26.016<br>75 | 258 | 87.79% | 25.16<br>795 | Mob3c    |
| 108735 | 5526 | 267 | 81.98% | 13.568<br>63 | 162 | 65.85% | 8.241<br>879 | Sft2d2   |
| 22057  | 2288 | 267 | 86.15% | 32.771<br>09 | 298 | 83.17% | 36.61<br>697 | Tob1     |

|                                |      |     |        |              |     |        |              |              |
|--------------------------------|------|-----|--------|--------------|-----|--------|--------------|--------------|
| 1E+08                          | 1766 | 266 | 72.54% | 42.298<br>66 | 414 | 79.05% | 65.90<br>703 | Mir22hg      |
| 383295                         | 2869 | 266 | 69.05% | 26.036<br>75 | 272 | 71.21% | 26.65<br>388 | Ypel5        |
| 234729                         | 3053 | 266 | 93.25% | 24.467<br>55 | 162 | 81.20% | 14.91<br>799 | Vac14        |
| 21927                          | 3709 | 266 | 87.79% | 20.140<br>05 | 195 | 81.72% | 14.78<br>087 | Tnfaip1      |
| 170759                         | 3915 | 266 | 84.73% | 19.080<br>32 | 177 | 79%    | 12.71<br>053 | Atp13a1      |
| 235682                         | 6189 | 266 | 71.19% | 12.069<br>71 | 128 | 52.51% | 5.814<br>49  | Zfp445       |
| 13169                          | 2369 | 266 | 94.60% | 31.532<br>06 | 192 | 86.49% | 22.78<br>549 | Dbnl         |
| 26403                          | 3919 | 266 | 82.42% | 19.060<br>84 | 211 | 73.36% | 15.13<br>663 | Map3k1<br>1  |
| 227699                         | 5670 | 266 | 81.16% | 13.174<br>5  | 191 | 61.15% | 9.470<br>489 | Nup188       |
| 75415                          | 5034 | 266 | 73.98% | 14.838<br>98 | 192 | 63.67% | 10.72<br>285 | Arhgap1<br>2 |
| 72515                          | 3450 | 266 | 91.10% | 21.652<br>01 | 225 | 84.78% | 18.33<br>52  | Wdr43        |
| 12034                          | 1360 | 266 | 97.28% | 54.926<br>06 | 273 | 98.75% | 56.43<br>465 | Phb2         |
| 229517                         | 3592 | 265 | 93.62% | 20.717<br>88 | 231 | 83.02% | 18.07<br>997 | Slc25a44     |
| 229707                         | 3248 | 265 | 92.92% | 22.912<br>14 | 233 | 83.96% | 20.16<br>796 | Fam40a       |
| 54709                          | 1127 | 265 | 96.63% | 66.032<br>49 | 257 | 93.70% | 64.11<br>082 | Eif3i        |
| 235461                         | 8081 | 265 | 68.52% | 9.2090<br>85 | 175 | 55.30% | 6.088<br>286 | Fam63b       |
| 14678                          | 2177 | 265 | 36.61% | 34.184<br>02 | 312 | 36.84% | 40.29<br>195 | Gnai2        |
| gi 91598585 ref NM_001005506.2 | 4702 | 264 | 82.86% | 15.767<br>29 | 214 | 76.90% | 12.79<br>538 | -            |
| 66354                          | 2257 | 264 | 95.44% | 32.847<br>94 | 278 | 94.90% | 34.62<br>863 | Snw1         |
| 14050                          | 5204 | 264 | 85.03% | 14.246<br>31 | 173 | 74.12% | 9.346<br>111 | Eya3         |
| 16825                          | 2295 | 264 | 82.09% | 32.304<br>05 | 220 | 76.95% | 26.95<br>021 | Ldb1         |
| 15184                          | 3816 | 264 | 89.75% | 19.428<br>14 | 230 | 83.86% | 16.94<br>5   | Hdac5        |



|        |      |     |        |              |     |        |              |                   |
|--------|------|-----|--------|--------------|-----|--------|--------------|-------------------|
| 15936  | 1541 | 264 | 97.14% | 48.110<br>18 | 360 | 94.55% | 65.67<br>831 | Ier2              |
| 109263 | 6585 | 264 | 70.52% | 11.258<br>59 | 213 | 64.31% | 9.093<br>811 | Rlf               |
| 211978 | 9368 | 264 | 60.60% | 7.9139<br>4  | 182 | 45.38% | 5.461<br>936 | Zfyve26           |
| 210711 | 4171 | 264 | 79.33% | 17.774<br>58 | 210 | 73.70% | 14.15<br>472 | Mcmbp             |
| 217664 | 2620 | 264 | 85.61% | 28.296<br>87 | 291 | 86.49% | 31.22<br>582 | Mgat2             |
| 13167  | 593  | 264 | 72.85% | 125.02<br>16 | 282 | 72.18% | 133.6<br>954 | Dbi               |
| 12607  | 4091 | 264 | 76.17% | 18.122<br>17 | 285 | 81.40% | 19.58<br>563 | Cebpz             |
| 68778  | 2938 | 264 | 93.16% | 25.234<br>1  | 220 | 87.24% | 21.05<br>198 | 1110038<br>D17Rik |
| 72925  | 4391 | 264 | 77.91% | 16.884<br>03 | 183 | 69.60% | 11.71<br>682 | 1-Mar             |
| 641340 | 1789 | 263 | 94.35% | 41.283<br>94 | 206 | 90.67% | 32.37<br>271 | Nrbf2             |
| 20684  | 2158 | 263 | 82.44% | 34.224<br>73 | 232 | 83.92% | 30.22<br>447 | Sp100             |
| 75788  | 5333 | 263 | 83.72% | 13.849<br>05 | 163 | 68.65% | 8.592<br>868 | Smurf1            |
| 72057  | 1665 | 263 | 87.63% | 44.358<br>54 | 278 | 85.95% | 46.94<br>104 | Phf10             |
| 106759 | 2852 | 262 | 90.15% | 25.798<br>09 | 241 | 87.24% | 23.75<br>689 | Ticam1            |
| 52808  | 2776 | 262 | 92.47% | 26.504<br>37 | 239 | 82.82% | 24.20<br>475 | Tsypyl2           |
| 107503 | 1833 | 262 | 95.85% | 40.139<br>74 | 237 | 91.65% | 36.35<br>03  | Atf5              |
| 24055  | 3069 | 262 | 83.97% | 23.973<br>98 | 355 | 88.86% | 32.52<br>023 | Sh3bp2            |
| 106529 | 1190 | 262 | 95.71% | 61.828<br>69 | 237 | 96.30% | 55.99<br>168 | Tecr              |
| 14705  | 1965 | 262 | 80.25% | 37.443<br>33 | 281 | 80.66% | 40.20<br>369 | Bsc12             |
| 13135  | 3506 | 262 | 17.17% | 20.985<br>78 | 292 | 16.17% | 23.41<br>494 | Dad1              |
| 213326 | 3431 | 261 | 89.04% | 21.362<br>67 | 186 | 74.50% | 15.24<br>103 | Scyl2             |
| 56784  | 7922 | 261 | 65.51% | 9.2521<br>23 | 182 | 47.40% | 6.458<br>902 | Ralgapa1          |

|                                 |      |     |        |              |     |        |              |              |
|---------------------------------|------|-----|--------|--------------|-----|--------|--------------|--------------|
| 99375                           | 3628 | 261 | 91.29% | 20.202<br>68 | 232 | 86.47% | 17.97<br>806 | Cul4a        |
| 93762                           | 4658 | 261 | 54.74% | 15.735<br>36 | 233 | 52.58% | 14.06<br>302 | Smarca5      |
| 97387                           | 3562 | 261 | 77.29% | 20.577<br>01 | 211 | 71.93% | 16.65<br>37  | Strn4        |
| gi 32813438 ref N<br>M_177262.3 | 3124 | 261 | 90.36% | 23.462<br>01 | 179 | 85.79% | 16.10<br>883 | -            |
| 55950                           | 963  | 261 | 75.29% | 76.111<br>44 | 389 | 84.42% | 113.5<br>652 | Bri3         |
| 71678                           | 3457 | 261 | 56.06% | 21.202       | 216 | 52.10% | 17.56<br>615 | Brox         |
| 22260                           | 1964 | 261 | 97.81% | 37.319<br>41 | 223 | 95.21% | 31.92<br>166 | Nr1h2        |
| 17281                           | 7942 | 261 | 67.90% | 9.2288<br>23 | 385 | 74.40% | 13.62<br>865 | Fyco1        |
| gi 32130520 ref N<br>M_025441.2 | 3720 | 260 | 83.87% | 19.627<br>55 | 276 | 81.37% | 20.85<br>875 | -            |
| 56305                           | 2761 | 260 | 97.97% | 26.444<br>94 | 213 | 90.80% | 21.68<br>879 | Pitpnb       |
| 56428                           | 2420 | 260 | 83.06% | 30.171<br>28 | 273 | 83.06% | 31.71<br>534 | Mtch2        |
| 224619                          | 2735 | 260 | 89.29% | 26.696<br>34 | 192 | 83.84% | 19.73<br>631 | Traf7        |
| 57912                           | 2757 | 260 | 87.52% | 26.483<br>31 | 180 | 88.83% | 18.35<br>515 | Cdc42se<br>1 |
| 74322                           | 2537 | 259 | 92.08% | 28.669<br>16 | 227 | 86.16% | 25.15<br>518 | Cxxc1        |
| 20847                           | 4402 | 259 | 81.35% | 16.522<br>87 | 307 | 82.53% | 19.60<br>697 | Stat2        |
| 75137                           | 8419 | 259 | 63.76% | 8.6392<br>29 | 164 | 53.39% | 5.476<br>53  | Rprd2        |
| 329003                          | 7725 | 259 | 69.11% | 9.4153<br>61 | 254 | 69.45% | 9.243<br>945 | Zfp516       |
| 67845                           | 2265 | 259 | 65.03% | 32.111<br>99 | 198 | 59.07% | 24.57<br>645 | Rnf115       |
| 18538                           | 1260 | 259 | 52.30% | 57.725<br>13 | 280 | 51.59% | 62.47<br>548 | Pcna         |
| 76808                           | 1291 | 259 | 15.10% | 56.339<br>01 | 290 | 15.10% | 63.15<br>298 | Rpl18a       |
| 103537                          | 5231 | 258 | 82.26% | 13.850<br>67 | 251 | 76.45% | 13.48<br>997 | Mbtd1        |
| 14571                           | 5745 | 258 | 80.23% | 12.611<br>46 | 199 | 67.61% | 9.738<br>345 | Gpd2         |

|                                 |       |     |        |              |     |        |              |                   |
|---------------------------------|-------|-----|--------|--------------|-----|--------|--------------|-------------------|
| 241694                          | 9633  | 257 | 61.78% | 7.4921<br>64 | 234 | 55.13% | 6.829<br>304 | Ralgapa2          |
| 18186                           | 5921  | 257 | 79.34% | 12.189<br>16 | 253 | 75.76% | 12.01<br>289 | Nrp1              |
| 171207                          | 3321  | 257 | 91.33% | 21.732<br>01 | 150 | 75.85% | 12.69<br>827 | Arhgap4           |
| 12795                           | 2474  | 257 | 91.31% | 29.172<br>2  | 268 | 87.83% | 30.45<br>49  | Plk3              |
| 55942                           | 1188  | 257 | 96.55% | 60.750<br>85 | 379 | 97.90% | 89.69<br>018 | Sertad1           |
| 19707                           | 2618  | 257 | 92.40% | 27.567<br>61 | 273 | 93.16% | 29.31<br>67  | Reps1             |
| 12334                           | 3205  | 257 | 92.98% | 22.518<br>57 | 231 | 88.46% | 20.26<br>311 | Capn2             |
| 68877                           | 1749  | 257 | 93.83% | 41.264<br>73 | 204 | 93.14% | 32.79<br>159 | Maf1              |
| 57439                           | 3169  | 257 | 92.81% | 22.774<br>38 | 241 | 89.74% | 21.38<br>045 | Tmem18<br>3a      |
| 72123                           | 4155  | 257 | 72.39% | 17.369<br>92 | 219 | 80.60% | 14.81<br>819 | 2010109<br>K11Rik |
| 17191                           | 1866  | 257 | 69.24% | 38.677<br>39 | 242 | 70.15% | 36.46<br>077 | Mbd2              |
| 13838                           | 6328  | 256 | 77.23% | 11.360<br>81 | 152 | 55.28% | 6.753<br>039 | Epha4             |
| 228913                          | 5685  | 256 | 76.73% | 12.645<br>77 | 218 | 70.06% | 10.78<br>073 | Zfp217            |
| 12750                           | 1892  | 256 | 90.86% | 37.997<br>46 | 249 | 95.51% | 36.99<br>988 | Clk4              |
| 66871                           | 3324  | 256 | 61.34% | 21.627<br>92 | 290 | 70.52% | 24.52<br>783 | Cpne8             |
| 68744                           | 3760  | 256 | 85.77% | 19.12        | 196 | 77.42% | 14.65<br>515 | Zfp740            |
| 329908                          | 10601 | 256 | 51.70% | 6.7815<br>48 | 119 | 29.10% | 3.155<br>893 | Usp24             |
| 110920                          | 4175  | 256 | 83.69% | 17.219<br>45 | 234 | 82.97% | 15.75<br>729 | Hspa13            |
| 17304                           | 2143  | 256 | 95.10% | 33.546<br>99 | 340 | 96.50% | 44.60<br>452 | Mfge8             |
| gi 19527233 ref N<br>M_134017.1 | 1801  | 256 | 96.84% | 39.917<br>37 | 207 | 95.61% | 32.31<br>311 | -                 |
| 22333                           | 1766  | 256 | 97.73% | 40.708<br>49 | 254 | 99.09% | 40.43<br>572 | Vdac1             |
| gi 37674237 ref N<br>M_177710.3 | 4368  | 255 | 84.55% | 16.394<br>31 | 258 | 86.79% | 16.60<br>578 | -                 |

|                              |       |     |        |              |     |        |              |                   |
|------------------------------|-------|-----|--------|--------------|-----|--------|--------------|-------------------|
| 269254                       | 10970 | 255 | 56.45% | 6.5278<br>36 | 141 | 36.60% | 3.613<br>554 | Setx              |
| 66229                        | 2606  | 255 | 86.88% | 27.479<br>04 | 233 | 88.87% | 25.13<br>643 | Rpl711            |
| 66849                        | 4098  | 255 | 62.18% | 17.474<br>47 | 332 | 70.03% | 22.77<br>657 | Ppp1r2            |
| 110854                       | 2577  | 255 | 96.74% | 27.788<br>27 | 244 | 92.98% | 26.61<br>935 | Ppp2r4            |
| 19172                        | 949   | 255 | 93.78% | 75.458<br>76 | 274 | 95.36% | 81.17<br>204 | Psbm4             |
| 30791                        | 2344  | 255 | 36.43% | 30.550<br>5  | 338 | 36.05% | 40.53<br>976 | Slc39a1           |
| 19332                        | 722   | 255 | 99.45% | 99.183<br>33 | 401 | 99.86% | 156.1<br>454 | Rab20             |
| 212111                       | 2843  | 254 | 84.77% | 25.089<br>53 | 192 | 83.19% | 18.98<br>657 | Inpp5a            |
| 56491                        | 6969  | 254 | 42.07% | 10.235<br>26 | 258 | 38.90% | 10.40<br>81  | Vapb              |
| 72949                        | 3514  | 254 | 87.76% | 20.298<br>67 | 160 | 82.81% | 12.80<br>09  | Ccnt2             |
| 17939                        | 1913  | 254 | 94.20% | 37.286<br>74 | 261 | 95.71% | 38.35<br>727 | Naga              |
| gi 141803555 ref NM_028774.2 | 3322  | 254 | 86.42% | 21.471<br>87 | 168 | 77%    | 14.21<br>778 | -                 |
| 19385                        | 852   | 254 | 97.65% | 83.720<br>12 | 282 | 97.07% | 93.05<br>327 | Ranbp1            |
| 217232                       | 5783  | 254 | 75.62% | 12.334<br>35 | 168 | 68.49% | 8.167<br>294 | Cdc27             |
| 67628                        | 1382  | 254 | 73.44% | 51.613<br>27 | 244 | 71.56% | 49.63<br>681 | Anp32b            |
| 28064                        | 2035  | 254 | 88.11% | 35.051<br>37 | 219 | 81.13% | 30.25<br>532 | Yipf3             |
| 56715                        | 2843  | 254 | 49.77% | 25.089<br>53 | 430 | 52.59% | 42.52<br>2   | Rabgef1           |
| 66409                        | 1839  | 253 | 96.36% | 38.634<br>43 | 257 | 97.28% | 39.28<br>923 | Rsl1d1            |
| 269113                       | 2332  | 253 | 81.30% | 30.466<br>86 | 271 | 83.02% | 32.67<br>103 | Nup54             |
| 68480                        | 804   | 253 | 97.01% | 88.369<br>05 | 365 | 97.14% | 127.6<br>318 | 1110007<br>C09Rik |
| 65964                        | 6704  | 253 | 63.65% | 10.597<br>96 | 173 | 48.24% | 7.254<br>947 | B230120<br>H23Rik |
| 69860                        | 2469  | 253 | 83.60% | 28.776<br>31 | 269 | 87.89% | 30.63<br>045 | Eif1ad            |

|                                     |       |     |        |              |     |        |              |         |
|-------------------------------------|-------|-----|--------|--------------|-----|--------|--------------|---------|
| 108160                              | 1383  | 253 | 95.37% | 51.372<br>9  | 290 | 96.75% | 58.95<br>192 | Fam50a  |
| 103806                              | 5573  | 253 | 77.95% | 12.748<br>74 | 222 | 69.60% | 11.19<br>918 | Mam11   |
| 70508                               | 8742  | 253 | 70.04% | 8.1272<br>84 | 160 | 52.56% | 5.145<br>544 | Bbx     |
| 20869                               | 1643  | 253 | 96.10% | 43.243<br>28 | 207 | 97.50% | 35.42<br>052 | Stk11   |
| gi 70887768 ref N<br>M_013827.2     | 4060  | 253 | 83.99% | 17.499<br>68 | 247 | 79.85% | 17.10<br>382 | -       |
| gi 124486800 ref N<br>M_001081308.1 | 3050  | 253 | 92.89% | 23.294<br>66 | 223 | 91.90% | 20.55<br>546 | -       |
| 66674                               | 1690  | 253 | 85.03% | 42.040<br>66 | 271 | 84.79% | 45.08<br>216 | Spryd7  |
| 106957                              | 3905  | 253 | 80.10% | 18.194<br>29 | 235 | 80.33% | 16.91<br>878 | Slc39a6 |
| 106894                              | 5211  | 252 | 77.87% | 13.580<br>48 | 246 | 72.08% | 13.27<br>199 | Hmgxb3  |
| 72935                               | 2213  | 252 | 90.33% | 31.978<br>26 | 250 | 86.22% | 31.76<br>002 | Ddx41   |
| 17356                               | 7401  | 252 | 71.41% | 9.5619<br>36 | 220 | 67.94% | 8.357<br>077 | Mllt4   |
| 66625                               | 4545  | 252 | 71.77% | 15.570<br>49 | 223 | 73.55% | 13.79<br>409 | Sfrs18  |
| gi 165932359 ref N<br>M_009263.2    | 1410  | 252 | 95.39% | 50.189<br>99 | 164 | 94.61% | 32.69<br>993 | -       |
| 216558                              | 3097  | 252 | 75.33% | 22.850<br>47 | 246 | 70.20% | 22.33<br>14  | Ugp2    |
| 74006                               | 4078  | 252 | 80.41% | 17.353<br>58 | 184 | 71.31% | 12.68<br>507 | Dnm11   |
| 331623                              | 6049  | 252 | 76.19% | 11.699<br>11 | 247 | 65.18% | 11.47<br>983 | Bend3   |
| 16565                               | 9119  | 252 | 64.38% | 7.7604<br>88 | 92  | 34.77% | 2.836<br>369 | Kif21b  |
| gi 31341373 ref N<br>M_177619.2     | 3262  | 252 | 89.24% | 21.694<br>63 | 205 | 87.16% | 17.66<br>819 | -       |
| 72124                               | 3542  | 252 | 83.91% | 19.979<br>64 | 210 | 83.94% | 16.66<br>836 | Seh11   |
| 19645                               | 4642  | 252 | 76.97% | 15.245<br>13 | 175 | 67.90% | 10.59<br>876 | Rb1     |
| 226977                              | 2077  | 252 | 99.47% | 34.072<br>17 | 206 | 97.64% | 27.88<br>386 | Actr1b  |
| 16001                               | 11978 | 252 | 58.31% | 5.9081<br>56 | 224 | 55.04% | 5.257<br>579 | Igf1r   |

|        |       |     |        |              |     |        |              |             |
|--------|-------|-----|--------|--------------|-----|--------|--------------|-------------|
| 20650  | 4423  | 252 | 58.17% | 15.999<br>98 | 225 | 55.21% | 14.30<br>17  | Sntb2       |
| 16561  | 10118 | 252 | 53.43% | 6.9942<br>57 | 204 | 40.02% | 5.668<br>362 | Kif1b       |
| 20195  | 504   | 252 | 59.13% | 140.41<br>25 | 302 | 58.93% | 168.4<br>607 | S100a11     |
| 101118 | 4548  | 251 | 75.57% | 15.498<br>48 | 199 | 69.35% | 12.30<br>141 | Tmem16<br>8 |
| 13423  | 1643  | 251 | 91.30% | 42.901<br>44 | 242 | 92.33% | 41.40<br>949 | Dnase2a     |
| 22186  | 524   | 251 | 43.32% | 134.51<br>73 | 254 | 44.08% | 136.2<br>776 | Uba52       |
| 67453  | 4371  | 251 | 66.87% | 16.126<br>07 | 152 | 57.86% | 9.776<br>534 | Slc25a46    |
| 72508  | 5395  | 251 | 80.26% | 13.065<br>26 | 230 | 80.39% | 11.98<br>556 | Rps6kb1     |
| 109331 | 4312  | 251 | 82.91% | 16.346<br>72 | 226 | 79.87% | 14.73<br>506 | Rnf20       |
| 20343  | 2341  | 251 | 80.86% | 30.109<br>81 | 137 | 76.16% | 16.45<br>286 | Sell        |
| 101476 | 3321  | 251 | 90.97% | 21.224<br>65 | 165 | 79.67% | 13.96<br>81  | Plekha1     |
| 52065  | 6408  | 250 | 69.02% | 10.956<br>03 | 192 | 58.88% | 8.423<br>66  | Mfhas1      |
| 21844  | 7312  | 250 | 75.26% | 9.6015<br>1  | 233 | 65.92% | 8.958<br>635 | Tiam1       |
| 26443  | 997   | 250 | 95.89% | 70.417<br>49 | 280 | 97.29% | 78.95<br>597 | Psma6       |
| 116873 | 4930  | 250 | 61.85% | 14.240<br>62 | 221 | 59.13% | 12.60<br>281 | Stim2       |
| 13723  | 2622  | 250 | 79.48% | 26.775<br>84 | 123 | 69.37% | 13.18<br>847 | Emb         |
| 12452  | 2510  | 250 | 89.24% | 27.970<br>61 | 317 | 94.42% | 35.50<br>648 | Ccng2       |
| 217835 | 3880  | 250 | 78.89% | 18.094<br>39 | 119 | 67.16% | 8.622<br>582 | Rin3        |
| 170736 | 3705  | 250 | 74.63% | 18.949<br>05 | 400 | 73.23% | 30.35<br>246 | Parvb       |
| 56190  | 1787  | 250 | 92.28% | 39.287<br>21 | 250 | 93.84% | 39.33<br>123 | Rbm38       |
| 226412 | 4812  | 249 | 78.68% | 14.531<br>47 | 183 | 73.17% | 10.69<br>172 | R3hdm1      |
| 71279  | 5240  | 249 | 69.71% | 13.344<br>54 | 174 | 61.11% | 9.335<br>554 | Slc29a3     |

|                                     |       |     |        |              |     |        |              |              |
|-------------------------------------|-------|-----|--------|--------------|-----|--------|--------------|--------------|
| 13486                               | 3080  | 249 | 80%    | 22.703<br>06 | 242 | 84.09% | 22.08<br>954 | Dr1          |
| 63958                               | 5535  | 249 | 69.14% | 12.633<br>32 | 178 | 61.92% | 9.041<br>167 | Ube4b        |
| 17381                               | 3607  | 249 | 46.88% | 19.386<br>03 | 159 | 41.64% | 12.39<br>29  | Mmp12        |
| 215632                              | 4700  | 249 | 89.60% | 14.877<br>75 | 161 | 68.45% | 9.630<br>529 | Psd4         |
| 56454                               | 3544  | 248 | 84.37% | 19.651<br>41 | 201 | 83.83% | 15.94<br>5   | Aldh18a<br>1 |
| gi 153792092 ref N<br>M_172421.3    | 8862  | 248 | 64.44% | 7.8587<br>89 | 120 | 40.65% | 3.806<br>901 | -            |
| 20222                               | 1674  | 248 | 96.30% | 41.603<br>7  | 255 | 99.40% | 42.82<br>593 | Sf3a2        |
| 18015                               | 11847 | 248 | 55.33% | 5.8786<br>69 | 196 | 42.88% | 4.651<br>251 | Nf1          |
| gi 118130154 ref N<br>M_145528.2    | 3544  | 248 | 81.46% | 19.651<br>41 | 215 | 84.17% | 17.05<br>559 | -            |
| 60532                               | 4967  | 248 | 35.88% | 14.021<br>46 | 223 | 22.21% | 12.62<br>213 | Wtap         |
| gi 149270711 ref X<br>M_001479552.1 | 4703  | 248 | 34.06% | 14.808<br>55 | 275 | 30.28% | 16.43<br>917 | -            |
| 54126                               | 4946  | 248 | 38.27% | 14.080<br>99 | 209 | 30.33% | 11.87<br>994 | Arhgef7      |
| 71927                               | 3355  | 247 | 86.05% | 20.674<br>74 | 253 | 81.61% | 21.20<br>07  | Itfg1        |
| 236920                              | 4983  | 247 | 80.11% | 13.920<br>08 | 202 | 71.30% | 11.39<br>679 | Stard8       |
| 225372                              | 2077  | 247 | 92.49% | 33.396<br>13 | 232 | 87.10% | 31.40<br>318 | Appb3        |
| 229317                              | 2322  | 247 | 83.68% | 29.872<br>42 | 238 | 81.48% | 28.81<br>621 | Eif2a        |
| 67134                               | 1904  | 247 | 65.07% | 36.430<br>55 | 229 | 63.34% | 33.81<br>354 | Nop56        |
| 235661                              | 2046  | 247 | 97.31% | 33.902<br>13 | 227 | 94.72% | 31.19<br>194 | Dync1li1     |
| 14773                               | 3182  | 246 | 76.24% | 21.710<br>54 | 215 | 72.72% | 18.99<br>592 | Grk5         |
| 100201                              | 4681  | 246 | 75.41% | 14.758<br>16 | 185 | 66.97% | 11.11<br>105 | Tmem64       |
| 106039                              | 3034  | 246 | 86.35% | 22.769<br>59 | 201 | 83.65% | 18.62<br>527 | Gga1         |
| 69368                               | 4566  | 246 | 81.08% | 15.129<br>86 | 239 | 81.27% | 14.71<br>581 | Wdfy1        |

|                                  |       |     |        |              |     |        |              |                   |
|----------------------------------|-------|-----|--------|--------------|-----|--------|--------------|-------------------|
| 30050                            | 2905  | 246 | 84.65% | 23.780<br>7  | 236 | 70.53% | 22.83<br>957 | Fbxw2             |
| 18641                            | 3741  | 246 | 68.94% | 18.466<br>44 | 313 | 73.38% | 23.52<br>224 | Pfkl              |
| 51788                            | 957   | 246 | 29.57% | 72.186<br>98 | 217 | 29.99% | 63.74<br>849 | H2afz             |
| 269523                           | 3315  | 246 | 33.33% | 20.839<br>5  | 226 | 32.37% | 19.16<br>669 | Vcp               |
| 11797                            | 3155  | 246 | 94.48% | 21.896<br>34 | 173 | 83.17% | 15.41<br>59  | Birc2             |
| 103573                           | 5144  | 246 | 72.69% | 13.429<br>81 | 164 | 61.43% | 8.963<br>24  | Xpo1              |
| 74148                            | 5399  | 246 | 80.13% | 12.795<br>51 | 176 | 71.24% | 9.164<br>768 | 1300001<br>I01Rik |
| 217304                           | 2880  | 245 | 91.35% | 23.889<br>62 | 222 | 92.78% | 21.67<br>118 | Cd300lb           |
| 14081                            | 3891  | 245 | 83.91% | 17.682<br>37 | 172 | 73.53% | 12.42<br>766 | Acs11             |
| 74320                            | 6206  | 245 | 72.70% | 11.086<br>39 | 177 | 54.24% | 8.018<br>324 | Wdr33             |
| 227731                           | 3581  | 245 | 74.39% | 19.213<br>1  | 212 | 73.92% | 16.64<br>384 | Slc25a25          |
| gi 118130657 ref N<br>M_019713.3 | 1651  | 245 | 95.82% | 41.673       | 272 | 92.55% | 46.31<br>738 | -                 |
| 74150                            | 2597  | 245 | 84.87% | 26.492<br>92 | 216 | 76.82% | 23.38<br>32  | Slc35f5           |
| 243374                           | 3656  | 245 | 84.22% | 18.818<br>96 | 130 | 68.65% | 9.996<br>76  | Gimap8            |
| 245688                           | 2272  | 245 | 76.14% | 30.282<br>62 | 214 | 73.77% | 26.48<br>058 | Rbbp7             |
| 217463                           | 6239  | 245 | 78.38% | 11.027<br>75 | 184 | 69.72% | 8.291<br>344 | Snx13             |
| 59042                            | 1043  | 244 | 96.74% | 65.696<br>35 | 265 | 96.07% | 71.43<br>05  | Cope              |
| 76559                            | 10173 | 244 | 57.88% | 6.7356<br>03 | 138 | 39.69% | 3.813<br>749 | Atg2b             |
| 99382                            | 4595  | 244 | 84.79% | 14.912<br>14 | 274 | 77.58% | 16.76<br>437 | Abtb2             |
| 66626                            | 3898  | 244 | 75.91% | 17.578<br>58 | 169 | 72.68% | 12.18<br>897 | 5730403<br>B10Rik |
| 213541                           | 4078  | 244 | 72.46% | 16.802<br>67 | 167 | 65.62% | 11.51<br>308 | Ythdf2            |
| 217732                           | 4268  | 244 | 79.10% | 16.054<br>66 | 158 | 68.21% | 10.40<br>77  | 2310044<br>G17Rik |



|                            |      |     |        |              |     |        |              |          |
|----------------------------|------|-----|--------|--------------|-----|--------|--------------|----------|
| 23857                      | 3755 | 243 | 83.01% | 18.173<br>23 | 161 | 69.69% | 12.05<br>419 | Dmtf1    |
| 383619                     | 2541 | 243 | 78.98% | 26.855<br>75 | 235 | 79.18% | 26.00<br>072 | Aim2     |
| 70028                      | 7331 | 243 | 67.77% | 9.3084<br>8  | 178 | 56.09% | 6.826<br>198 | Dopey2   |
| 74585                      | 2817 | 243 | 85.73% | 24.224<br>52 | 227 | 81.97% | 22.65<br>485 | Sppl3    |
| 277414                     | 2687 | 243 | 94.31% | 25.396<br>53 | 138 | 89.80% | 14.43<br>888 | Trp53i11 |
| 14479                      | 3215 | 243 | 91.66% | 21.225<br>65 | 245 | 86.10% | 21.42<br>433 | Usp15    |
| 14102                      | 1486 | 243 | 89.10% | 45.922<br>25 | 340 | 95.22% | 64.32<br>536 | Fas      |
| 15442                      | 3082 | 243 | 96.04% | 22.141<br>62 | 231 | 92.50% | 21.07<br>179 | Hpse     |
| 231769                     | 3319 | 243 | 89.36% | 20.560<br>55 | 213 | 88.46% | 18.04<br>241 | Sfswap   |
| 330401                     | 5719 | 243 | 78.27% | 11.932<br>24 | 161 | 65.83% | 7.914<br>58  | Tmcc1    |
| 19182                      | 1651 | 243 | 90.31% | 41.332<br>81 | 255 | 93.76% | 43.42<br>254 | Psmc3    |
| 13476                      | 2910 | 242 | 90.55% | 23.353<br>83 | 223 | 90.31% | 21.54<br>438 | Reep5    |
| 20193                      | 615  | 242 | 95.45% | 110.50<br>35 | 335 | 95.45% | 153.1<br>411 | S100a1   |
| 68137                      | 1525 | 242 | 95.34% | 44.563<br>7  | 278 | 97.97% | 51.25<br>038 | Kdelr1   |
| 20817                      | 6436 | 242 | 64.81% | 10.559<br>3  | 201 | 61.20% | 8.780<br>154 | Srpk2    |
| 19175                      | 1036 | 242 | 79.54% | 65.598<br>11 | 244 | 82.82% | 66.21<br>436 | Psmb6    |
| gi 6755966 ref NM_011696.1 | 1345 | 242 | 83.64% | 50.527<br>61 | 250 | 82.16% | 52.25<br>644 | -        |
| 70797                      | 6610 | 242 | 71.89% | 10.281<br>34 | 136 | 58.44% | 5.784<br>417 | Ankib1   |
| 22099                      | 3040 | 242 | 92.50% | 22.355<br>15 | 190 | 85%    | 17.57<br>123 | Tsn      |
| 56615                      | 943  | 242 | 95.76% | 72.067<br>49 | 335 | 96.29% | 99.87<br>464 | Mgst1    |
| 52898                      | 622  | 241 | 97.27% | 108.80<br>84 | 272 | 95.98% | 122.9<br>421 | Rnasek   |
| 101489                     | 2967 | 241 | 82.44% | 22.810<br>52 | 167 | 69.36% | 15.82<br>417 | Ric8     |

|                                   |      |     |        |              |     |        |              |                |
|-----------------------------------|------|-----|--------|--------------|-----|--------|--------------|----------------|
| 68152                             | 2304 | 241 | 84.03% | 29.374<br>49 | 261 | 87.54% | 31.84<br>785 | Fam133b        |
| 17978                             | 8213 | 241 | 67.47% | 8.2404<br>5  | 184 | 57.62% | 6.298<br>514 | Ncoa2          |
| 70999                             | 3275 | 241 | 87.08% | 20.665<br>29 | 187 | 82.17% | 16.05<br>286 | Naa40          |
| 16170                             | 4989 | 241 | 54.08% | 13.565<br>61 | 101 | 44.98% | 5.691<br>543 | Il16           |
| 217695                            | 3869 | 241 | 89.84% | 17.492<br>59 | 134 | 70.87% | 9.737<br>068 | Zfyve1         |
| 225049                            | 4615 | 241 | 78.87% | 14.664<br>97 | 133 | 65.16% | 8.102<br>183 | Ttc7           |
| 170756                            | 2893 | 241 | 92.84% | 23.393<br>99 | 254 | 94.09% | 24.68<br>354 | Slc24a6        |
| 26908                             | 1801 | 241 | 95.89% | 37.578<br>47 | 204 | 92.39% | 31.84<br>48  | Eif2s3y        |
| 67956                             | 2738 | 241 | 91.64% | 24.718<br>34 | 205 | 86.56% | 21.04<br>954 | Setd8          |
| 74256                             | 8234 | 241 | 54.89% | 8.2194<br>34 | 146 | 41.30% | 4.984<br>988 | Cyld           |
| 212772                            | 3309 | 241 | 88.64% | 20.452<br>95 | 187 | 84.74% | 15.88<br>792 | Arl14ep        |
| 78752                             | 3676 | 240 | 87.08% | 18.334<br>6  | 192 | 76.55% | 14.68<br>412 | Csgalnac<br>t2 |
| 16202                             | 1797 | 240 | 85.48% | 37.505<br>84 | 255 | 84.92% | 39.89<br>461 | Ilk            |
| 231876                            | 8114 | 240 | 64.48% | 8.3063<br>83 | 155 | 47.63% | 5.370<br>551 | Lmtk2          |
| 15929                             | 1335 | 240 | 96.55% | 50.485<br>39 | 238 | 96.93% | 50.12<br>078 | Idh3g          |
| gi 241982772 refl N<br>M_183390.2 | 2405 | 240 | 97.09% | 28.024<br>11 | 215 | 90.81% | 25.13<br>307 | -              |
| 66899                             | 3082 | 240 | 82.06% | 21.868<br>26 | 188 | 78.33% | 17.14<br>934 | Fip111         |
| 18626                             | 4663 | 240 | 80.63% | 14.453<br>78 | 140 | 71.63% | 8.440<br>822 | Per1           |
| 15357                             | 4444 | 240 | 84.14% | 15.166<br>06 | 199 | 77.81% | 12.58<br>929 | Hmgcr          |
| 109689                            | 7112 | 239 | 66.84% | 9.4371<br>72 | 239 | 62.42% | 9.447<br>747 | Arrb1          |
| 193385                            | 5615 | 239 | 69.56% | 11.953<br>19 | 102 | 46.95% | 5.107<br>078 | Fam65b         |
| 217337                            | 2546 | 239 | 85.47% | 26.361<br>81 | 190 | 88.53% | 20.98<br>057 | Srp68          |

|        |      |     |        |              |     |        |              |              |
|--------|------|-----|--------|--------------|-----|--------|--------------|--------------|
| 12675  | 3500 | 239 | 87.94% | 19.176<br>33 | 178 | 77.71% | 14.29<br>796 | Chuk         |
| 18949  | 3469 | 239 | 78.09% | 19.347<br>7  | 166 | 81.35% | 13.45<br>321 | Pnn          |
| 67452  | 4425 | 239 | 72.66% | 15.167<br>72 | 198 | 61.88% | 12.57<br>981 | Pnpla8       |
| 105203 | 8356 | 238 | 64.61% | 7.9986<br>05 | 146 | 48.25% | 4.912<br>206 | BC0164<br>23 |
| 69082  | 1963 | 238 | 77.79% | 34.048<br>06 | 263 | 80.54% | 37.66<br>67  | Zc3h15       |
| 18555  | 3042 | 238 | 81.43% | 21.971<br>18 | 197 | 81.43% | 18.20<br>661 | Cdk16        |
| 66146  | 3842 | 238 | 79.70% | 17.396<br>24 | 227 | 78.29% | 16.61<br>08  | Tmem57       |
| 64213  | 2260 | 238 | 91.55% | 29.573<br>6  | 173 | 86.68% | 21.52<br>087 | St7          |
| 104248 | 7483 | 238 | 68.60% | 8.9317<br>57 | 151 | 52.55% | 5.673<br>138 | Cabin1       |
| 20588  | 5684 | 238 | 77.85% | 11.758<br>68 | 136 | 61.93% | 6.726<br>776 | Smarcc1      |
| 12177  | 3237 | 238 | 59.72% | 20.647<br>62 | 264 | 60.49% | 22.92<br>891 | Bnip3l       |
| 17190  | 2672 | 238 | 92.89% | 25.013<br>6  | 235 | 90.38% | 24.72<br>598 | Mbd1         |
| 213895 | 4305 | 238 | 80.23% | 15.525<br>28 | 163 | 68.29% | 10.64<br>478 | Bms1         |
| 18484  | 4149 | 238 | 84.62% | 16.109<br>02 | 176 | 66.98% | 11.92<br>591 | Pam          |
| 107305 | 2415 | 238 | 92.34% | 27.675<br>5  | 268 | 96.98% | 31.19<br>894 | Vps37c       |
| 68953  | 927  | 238 | 93.10% | 72.099<br>61 | 240 | 96.22% | 72.78<br>697 | Chmp2a       |
| 231329 | 3812 | 238 | 87.64% | 17.533<br>14 | 159 | 76.21% | 11.72<br>644 | Polr2b       |
| 50932  | 4994 | 238 | 79.76% | 13.383<br>33 | 158 | 63.72% | 8.894<br>687 | Mink1        |
| 232286 | 6781 | 238 | 58.68% | 9.8564<br>14 | 196 | 53.89% | 8.126<br>143 | Tmf1         |
| 17248  | 3490 | 238 | 81.83% | 19.150<br>81 | 97  | 67.68% | 7.813<br>91  | Mdm4         |
| 17425  | 7462 | 238 | 67.21% | 8.9568<br>94 | 127 | 51.37% | 4.784<br>875 | Foxk1        |
| 20492  | 1641 | 238 | 95.73% | 40.729<br>03 | 233 | 95.98% | 39.91<br>806 | Slbp         |

|        |       |     |        |              |     |        |              |                   |
|--------|-------|-----|--------|--------------|-----|--------|--------------|-------------------|
| 56258  | 2364  | 238 | 64.68% | 28.272<br>56 | 226 | 63.03% | 26.87<br>714 | Hnrnp2            |
| 329559 | 4610  | 237 | 81.82% | 14.437<br>21 | 171 | 71.63% | 10.42<br>839 | Zfp335            |
| 72736  | 2418  | 237 | 88.75% | 27.525<br>03 | 267 | 92.27% | 31.04<br>396 | Tmx1              |
| 18983  | 2982  | 237 | 74.45% | 22.319<br>09 | 225 | 64.96% | 21.21<br>275 | Cnot7             |
| 67511  | 1463  | 237 | 95.97% | 45.492<br>49 | 255 | 92.89% | 49.00<br>247 | Tmed9             |
| 319594 | 6190  | 237 | 78.29% | 10.752<br>1  | 146 | 59.40% | 6.631<br>081 | Hif1an            |
| 11906  | 16439 | 237 | 43.09% | 4.0486<br>35 | 346 | 47.45% | 5.917<br>29  | Zfhx3             |
| 66743  | 2910  | 237 | 53.68% | 22.871<br>31 | 167 | 52.44% | 16.13<br>413 | Rnf220            |
| 621976 | 7170  | 237 | 68.47% | 9.2824<br>99 | 198 | 53.70% | 7.763<br>689 | Tmem17<br>0b      |
| 219105 | 5351  | 237 | 68.98% | 12.437<br>96 | 183 | 68.38% | 9.614<br>756 | Zmym5             |
| 22320  | 786   | 237 | 82.95% | 84.676<br>23 | 237 | 81.42% | 84.77<br>112 | Vamp8             |
| 213783 | 7356  | 237 | 72.39% | 9.0477<br>86 | 180 | 59.49% | 6.879<br>437 | Plekhg1           |
| 319997 | 1936  | 237 | 87.29% | 34.377<br>85 | 164 | 80.48% | 23.81<br>555 | A630001<br>G21Rik |
| 434215 | 3817  | 237 | 90.20% | 17.436<br>6  | 173 | 75.19% | 12.74<br>225 | Lrrc32            |
| 226594 | 2670  | 236 | 94.01% | 24.821<br>98 | 136 | 83.97% | 14.32<br>022 | Rcsd1             |
| 22123  | 2167  | 236 | 94.83% | 30.583<br>61 | 247 | 89.80% | 32.04<br>499 | Psm3              |
| 98432  | 6123  | 236 | 69.52% | 10.823<br>89 | 154 | 53.13% | 7.070<br>963 | Phlpp1            |
| 12361  | 8260  | 236 | 56.53% | 8.0235<br>7  | 250 | 55.97% | 8.509<br>07  | Cask              |
| 329002 | 9473  | 236 | 62.60% | 6.9961<br>67 | 164 | 49.32% | 4.867<br>191 | Zfp236            |
| 234663 | 4647  | 236 | 81.79% | 14.261<br>82 | 184 | 72.69% | 11.13<br>185 | Dync1li2          |
| 241915 | 11066 | 236 | 57.25% | 5.9890<br>38 | 116 | 35.35% | 2.947<br>063 | Phc3              |
| 207806 | 12622 | 236 | 54.90% | 5.2507<br>28 | 102 | 30.11% | 2.271<br>926 | Gm608             |

|                              |      |     |        |              |     |        |              |              |
|------------------------------|------|-----|--------|--------------|-----|--------|--------------|--------------|
| 20815                        | 2484 | 236 | 95.65% | 26.680<br>63 | 157 | 85.71% | 17.76<br>929 | Srpk1        |
| gi 37595741 ref NM_029498.2  | 4661 | 236 | 81.53% | 14.218<br>99 | 152 | 64.90% | 9.168<br>253 | -            |
| 216131                       | 5048 | 235 | 35.72% | 13.073<br>27 | 252 | 35.66% | 14.03<br>471 | Trappc1<br>0 |
| gi 118130840 ref NM_013664.2 | 2014 | 235 | 95.08% | 32.767<br>56 | 243 | 93.94% | 33.92<br>102 | -            |
| 237615                       | 6615 | 235 | 68.66% | 9.9763<br>97 | 138 | 50.07% | 5.865<br>045 | Ankrd52      |
| 14862                        | 1310 | 235 | 79.39% | 50.377       | 273 | 71.76% | 58.58<br>865 | Gstm1        |
| 53602                        | 1561 | 235 | 90.58% | 42.276<br>66 | 297 | 96.28% | 53.49<br>038 | Hpcal1       |
| 209456                       | 4377 | 235 | 81.49% | 15.077<br>42 | 185 | 72.08% | 11.88<br>276 | Trp53bp<br>2 |
| gi 91064877 ref NM_027230.3  | 5271 | 235 | 83%    | 12.520<br>18 | 166 | 69.59% | 8.853<br>953 | -            |
| 14270                        | 8040 | 235 | 58.48% | 8.2081<br>92 | 259 | 64.89% | 9.056<br>613 | Srgap2       |
| 19185                        | 1252 | 235 | 99.12% | 52.710<br>76 | 239 | 99.04% | 53.66<br>803 | Psmc4        |
| 57808                        | 549  | 235 | 26.59% | 120.20<br>74 | 272 | 17.67% | 139.2<br>896 | Rpl35a       |
| 327978                       | 5989 | 235 | 73.89% | 11.019<br>18 | 311 | 79.33% | 14.59<br>917 | Slfn5        |
| 52335                        | 7526 | 234 | 66.13% | 8.7314<br>7  | 149 | 54.17% | 5.566<br>012 | Atn1         |
| 71793                        | 3014 | 234 | 73.79% | 21.802<br>6  | 175 | 70.40% | 16.32<br>364 | Ints12       |
| 68592                        | 1276 | 234 | 93.34% | 51.499<br>25 | 218 | 87.62% | 48.03<br>17  | Syf2         |
| 104681                       | 4217 | 234 | 73.80% | 15.582<br>89 | 147 | 69.36% | 9.800<br>221 | Slc16a6      |
| 11767                        | 1964 | 234 | 94.60% | 33.458<br>78 | 197 | 95.57% | 28.19<br>985 | Ap1m1        |
| 11350                        | 7008 | 234 | 66.95% | 9.3768<br>61 | 194 | 58.36% | 7.782<br>69  | Abl1         |
| 67397                        | 1258 | 234 | 90.54% | 52.236<br>12 | 204 | 89.67% | 45.59<br>022 | Erp29        |
| 99412                        | 4477 | 234 | 82.62% | 14.677<br>92 | 153 | 67.63% | 9.607<br>855 | Golga2       |
| 74351                        | 2814 | 234 | 94.56% | 23.352<br>18 | 169 | 90.48% | 16.88<br>436 | Ddx23        |

|                                 |       |     |        |              |     |        |              |         |
|---------------------------------|-------|-----|--------|--------------|-----|--------|--------------|---------|
| 72198                           | 3309  | 234 | 88.61% | 19.858<br>88 | 210 | 83.20% | 17.84<br>205 | Skiv2l2 |
| 26396                           | 2387  | 234 | 82.20% | 27.529<br>55 | 244 | 82.66% | 28.73<br>82  | Map2k2  |
| 217351                          | 8740  | 234 | 61.48% | 7.5186<br>55 | 209 | 59.15% | 6.722<br>905 | Tnrc6c  |
| gi 257743032 ref NM_001033276.2 | 19805 | 233 | 12.65% | 3.3038<br>23 | 171 | 10.15% | 2.427<br>411 | -       |
| 67128                           | 3837  | 233 | 82.41% | 17.052<br>96 | 196 | 69.69% | 14.36<br>106 | Ube2g1  |
| 76742                           | 6259  | 233 | 66.80% | 10.454<br>1  | 172 | 57.52% | 7.725<br>838 | Snx27   |
| 19056                           | 3881  | 233 | 74.49% | 16.859<br>63 | 200 | 77.25% | 14.48<br>8   | Ppp3cb  |
| 69612                           | 2110  | 233 | 83.08% | 31.010<br>53 | 154 | 79.48% | 20.51<br>92  | Kansl2  |
| 104416                          | 3406  | 233 | 88.76% | 19.210<br>87 | 175 | 85.94% | 14.44<br>493 | Bap1    |
| 215476                          | 10546 | 233 | 53.84% | 6.2044<br>58 | 129 | 34.72% | 3.438<br>936 | Prl14l  |
| 67171                           | 2197  | 233 | 83.34% | 29.782<br>53 | 165 | 76.88% | 21.11<br>427 | Dram2   |
| 74255                           | 3273  | 233 | 53.35% | 19.991<br>51 | 209 | 52.95% | 17.95<br>24  | Smu1    |
| 19652                           | 2900  | 232 | 34.69% | 22.466       | 258 | 37.31% | 25.01<br>174 | Rbm3    |
| 217207                          | 4344  | 232 | 83.77% | 14.998<br>02 | 211 | 81.47% | 13.65<br>572 | Dhx8    |
| 77038                           | 3409  | 232 | 66.56% | 19.111<br>58 | 169 | 62.89% | 13.93<br>74  | Arfgap2 |
| 14747                           | 2845  | 232 | 95.82% | 22.900<br>31 | 208 | 92.13% | 20.55<br>432 | Cmklr1  |
| 56217                           | 5529  | 232 | 78.46% | 11.783<br>58 | 244 | 78.80% | 12.40<br>696 | Mpp5    |
| 72075                           | 2306  | 232 | 89.16% | 28.252<br>99 | 223 | 92.71% | 27.18<br>74  | Ogfr    |
| 55979                           | 2190  | 232 | 89%    | 29.749<br>49 | 212 | 92.15% | 27.21<br>535 | Agpat1  |
| 231887                          | 2203  | 232 | 93.65% | 29.573<br>94 | 229 | 89.33% | 29.22<br>423 | Pdap1   |
| 26440                           | 1255  | 232 | 88.21% | 51.913<br>46 | 216 | 90.28% | 48.38<br>738 | Psmal1  |
| 99480                           | 2427  | 232 | 91.22% | 26.844<br>41 | 240 | 91.14% | 27.80<br>12  | Dnttip2 |

|                              |       |     |        |              |     |        |              |         |
|------------------------------|-------|-----|--------|--------------|-----|--------|--------------|---------|
| 17127                        | 5090  | 232 | 76.70% | 12.799<br>88 | 191 | 72.22% | 10.54<br>964 | Smad3   |
| 21771                        | 2255  | 232 | 86.25% | 28.891<br>97 | 245 | 91.93% | 30.54<br>511 | Cirh1a  |
| 210126                       | 15669 | 232 | 41.38% | 4.1579<br>8  | 206 | 35.76% | 3.696<br>137 | Lpp     |
| 20439                        | 2488  | 232 | 80.99% | 26.186<br>25 | 309 | 81.63% | 34.91<br>646 | Siah2   |
| 229504                       | 2893  | 232 | 92.08% | 22.520<br>36 | 211 | 87.14% | 20.50<br>483 | Isg2012 |
| 224640                       | 2603  | 231 | 76.91% | 24.921<br>46 | 203 | 74.76% | 21.92<br>522 | Lemd2   |
| 228061                       | 7375  | 231 | 61.60% | 8.7960<br>09 | 173 | 49.42% | 6.594<br>869 | Agps    |
| gi 133892389 ref NM_009195.2 | 3747  | 231 | 90.10% | 17.312<br>67 | 190 | 82.57% | 14.25<br>581 | -       |
| 76900                        | 1498  | 231 | 91.52% | 43.304<br>78 | 223 | 93.19% | 41.85<br>19  | Ssbp4   |
| 140630                       | 6067  | 231 | 76.13% | 10.692<br>36 | 165 | 62.63% | 7.645<br>961 | Ube4a   |
| 17921                        | 7361  | 231 | 57.23% | 8.8127<br>38 | 221 | 50.75% | 8.440<br>683 | Myo7a   |
| 20663                        | 5612  | 231 | 67%    | 11.559<br>26 | 217 | 69.42% | 10.87<br>087 | Sos2    |
| 216877                       | 5179  | 231 | 76.42% | 12.525<br>69 | 166 | 66.75% | 9.011<br>235 | Dhx33   |
| 321019                       | 2942  | 230 | 86.54% | 21.954<br>36 | 135 | 75.32% | 12.90<br>07  | Gpr183  |
| 387524                       | 2610  | 230 | 74.94% | 24.747<br>03 | 163 | 64.83% | 17.55<br>776 | Znrf2   |
| 67276                        | 5067  | 230 | 69.78% | 12.747<br>14 | 193 | 72.03% | 10.70<br>85  | Eri1    |
| 233532                       | 11129 | 230 | 50.56% | 5.8037<br>33 | 168 | 37.48% | 4.243<br>999 | Rsf1    |
| 110616                       | 5376  | 230 | 79.50% | 12.014<br>46 | 175 | 73.94% | 9.151<br>682 | Atxn3   |
| 19062                        | 2660  | 230 | 94.29% | 24.281<br>86 | 258 | 94.29% | 27.26<br>843 | Inpp5k  |
| 30955                        | 6811  | 230 | 67.85% | 9.4831<br>51 | 151 | 61.84% | 6.232<br>872 | Pik3cg  |
| 266781                       | 1941  | 230 | 93.30% | 33.276<br>53 | 206 | 95.72% | 29.83<br>759 | Snx17   |
| 192119                       | 9851  | 230 | 59.75% | 6.5566<br>69 | 129 | 40.57% | 3.681<br>557 | Dicer1  |

|                                  |       |     |        |              |     |        |              |              |
|----------------------------------|-------|-----|--------|--------------|-----|--------|--------------|--------------|
| gi 170172549 ref N<br>M_026435.4 | 3034  | 230 | 69.15% | 21.288<br>64 | 225 | 73.47% | 20.84<br>918 | -            |
| 22288                            | 12382 | 230 | 50.85% | 5.2164<br>22 | 164 | 35.13% | 3.723<br>704 | Utrn         |
| 66087                            | 1958  | 230 | 94.48% | 32.987<br>61 | 231 | 98.57% | 33.16<br>816 | Emc3         |
| 234595                           | 3282  | 230 | 66%    | 19.679<br>99 | 191 | 61.97% | 16.36<br>127 | Slc38a7      |
| 225471                           | 3264  | 230 | 89.58% | 19.788<br>52 | 183 | 83.58% | 15.76<br>243 | Ticam2       |
| 64898                            | 5775  | 230 | 78.84% | 11.184<br>37 | 225 | 75.29% | 10.95<br>349 | Lpin2        |
| 66894                            | 4319  | 230 | 81.66% | 14.954<br>79 | 196 | 79.32% | 12.75<br>836 | Wwp2         |
| 67120                            | 11072 | 229 | 49.04% | 5.8082<br>48 | 159 | 33.84% | 4.037<br>32  | Ttc14        |
| 72981                            | 3478  | 229 | 86.37% | 18.490<br>2  | 160 | 78.46% | 12.93<br>339 | Prkrir       |
| 17344                            | 4984  | 229 | 68.26% | 12.903<br>07 | 214 | 71.89% | 12.07<br>141 | Pias2        |
| 627049                           | 3895  | 229 | 71.55% | 16.510<br>63 | 254 | 79.10% | 18.33<br>363 | Zfp800       |
| 66500                            | 9020  | 229 | 34.47% | 7.1295<br>92 | 256 | 35.94% | 7.979<br>13  | Slc30a7      |
| 18044                            | 3728  | 229 | 83.18% | 17.250<br>25 | 192 | 79.94% | 14.47<br>93  | Nfya         |
| 19305                            | 3148  | 229 | 84.94% | 20.428<br>5  | 211 | 86.63% | 18.84<br>386 | Pex5         |
| 71801                            | 2956  | 229 | 90.97% | 21.755<br>38 | 202 | 86.13% | 19.21<br>184 | Plekhf2      |
| 74142                            | 2970  | 229 | 92.15% | 21.652<br>83 | 201 | 86.40% | 19.02<br>662 | Lonp1        |
| gi 98986315 ref N<br>M_026582.3  | 2722  | 229 | 88.91% | 23.625<br>61 | 184 | 88.61% | 19.00<br>43  | -            |
| 69077                            | 1743  | 229 | 83.19% | 36.895<br>53 | 192 | 76.65% | 30.96<br>891 | Psm11        |
| 231225                           | 3508  | 229 | 82.70% | 18.332<br>07 | 178 | 80.76% | 14.26<br>535 | Tapt1        |
| 76117                            | 2663  | 229 | 89.75% | 24.149<br>05 | 212 | 90.95% | 22.38<br>138 | Arhgap1<br>5 |
| 19387                            | 3002  | 228 | 92.47% | 21.328<br>48 | 183 | 82.41% | 17.13<br>809 | Rangap1      |
| 67145                            | 2301  | 228 | 85.22% | 27.826<br>2  | 162 | 73.32% | 19.79<br>341 | Tomm34       |



|                              |      |     |        |              |     |        |              |                   |
|------------------------------|------|-----|--------|--------------|-----|--------|--------------|-------------------|
| 228869                       | 3151 | 228 | 86.61% | 20.319<br>93 | 175 | 83.37% | 15.61<br>391 | Ncoa5             |
| gi 133892263 ref NM_171826.2 | 1999 | 228 | 89.44% | 32.030<br>06 | 207 | 91.15% | 29.11<br>251 | -                 |
| 14710                        | 586  | 228 | 84.47% | 109.26<br>3  | 281 | 93.86% | 134.8<br>127 | Gngt2             |
| 22215                        | 5097 | 228 | 76.81% | 12.561<br>92 | 175 | 63.63% | 9.652<br>627 | Ube3a             |
| 1E+08                        | 1408 | 227 | 87.14% | 45.275<br>05 | 318 | 89.28% | 63.49<br>603 | Alf66227<br>0     |
| 19181                        | 1782 | 227 | 78.45% | 35.772<br>88 | 200 | 78.45% | 31.55<br>327 | Psmc2             |
| 209416                       | 3591 | 227 | 87.69% | 17.751<br>95 | 213 | 78.31% | 16.67<br>579 | Gpkow             |
| 56208                        | 2031 | 227 | 65.34% | 31.387<br>13 | 167 | 63.07% | 23.11<br>685 | Becn1             |
| gi 229608917 ref NM_181405.3 | 2712 | 227 | 89.82% | 23.505<br>63 | 140 | 79.24% | 14.51<br>311 | -                 |
| 72972                        | 7500 | 227 | 67.52% | 8.4996<br>36 | 128 | 50.47% | 4.798<br>117 | Gcap14            |
| 233905                       | 6327 | 227 | 68.18% | 10.075<br>43 | 113 | 46.28% | 5.021<br>145 | Zfp646            |
| 54484                        | 2936 | 227 | 93.63% | 21.712<br>28 | 174 | 88.73% | 16.66<br>155 | Mkm1              |
| 74116                        | 2245 | 227 | 91.67% | 28.395<br>22 | 298 | 97.02% | 37.31<br>832 | Pi16              |
| 19946                        | 599  | 226 | 36.23% | 105.95<br>4  | 262 | 38.23% | 122.9<br>693 | Rpl30             |
| 66144                        | 635  | 226 | 91.81% | 99.947<br>15 | 274 | 91.18% | 121.3<br>107 | Atp6v1f           |
| 68544                        | 934  | 226 | 92.29% | 67.951<br>22 | 254 | 91.22% | 76.45<br>554 | 2310036<br>O22Rik |
| 69189                        | 1132 | 226 | 93.99% | 56.065<br>76 | 361 | 99.38% | 89.65<br>673 | 1810033<br>B17Rik |
| 12858                        | 707  | 226 | 92.64% | 89.768<br>66 | 219 | 89.25% | 87.08<br>569 | Cox5a             |
| 12018                        | 2017 | 225 | 93.16% | 31.326<br>53 | 168 | 92.36% | 23.41<br>669 | Bak1              |
| 18739                        | 4508 | 225 | 79.72% | 14.016<br>33 | 207 | 71.58% | 12.90<br>947 | Pitpnm1           |
| 13006                        | 4851 | 225 | 77.39% | 13.025<br>28 | 191 | 74.83% | 11.06<br>94  | Smc3              |
| 74277                        | 1115 | 225 | 79.91% | 56.668<br>71 | 353 | 85.56% | 89.00<br>655 | Chic2             |

|                                  |      |     |        |              |     |        |              |                   |
|----------------------------------|------|-----|--------|--------------|-----|--------|--------------|-------------------|
| 71780                            | 1850 | 225 | 96.27% | 34.154<br>39 | 268 | 96.81% | 40.72<br>726 | Isynal            |
| 216345                           | 6956 | 225 | 67.19% | 9.0836<br>14 | 175 | 58.73% | 7.072<br>95  | Zfc3h1            |
| 226646                           | 1606 | 225 | 98.57% | 39.343<br>47 | 222 | 98.07% | 38.86<br>239 | Ndufs2            |
| 231712                           | 2498 | 225 | 87.15% | 25.294<br>48 | 192 | 89.07% | 21.60<br>881 | Traf1             |
| 56738                            | 2655 | 225 | 90.70% | 23.798<br>73 | 191 | 84.97% | 20.22<br>511 | Mocs1             |
| 66185                            | 7115 | 225 | 69.28% | 8.8806<br>21 | 141 | 52.59% | 5.571<br>425 | 1110037<br>F02Rik |
| 28185                            | 3778 | 225 | 82.27% | 16.724<br>62 | 198 | 80.33% | 14.73<br>416 | Tom70<br>a        |
| 12353                            | 1380 | 225 | 87.17% | 45.786<br>68 | 128 | 87.32% | 26.07<br>672 | Car6              |
| 268996                           | 3110 | 225 | 71.13% | 20.316<br>92 | 230 | 72.93% | 20.79<br>168 | Ss18              |
| 16391                            | 2545 | 225 | 85.93% | 24.827<br>35 | 224 | 89.27% | 24.74<br>471 | Irf9              |
| 18574                            | 2986 | 224 | 90.56% | 21.066<br>57 | 207 | 86.84% | 19.48<br>959 | Pdelb             |
| 242960                           | 2855 | 224 | 88.83% | 22.033<br>2  | 190 | 87.43% | 18.70<br>982 | Fbx15             |
| 215615                           | 2301 | 224 | 88.61% | 27.338<br>02 | 287 | 93.74% | 35.06<br>609 | Rnpep             |
| 212999                           | 4884 | 224 | 77.93% | 12.879<br>77 | 150 | 64.93% | 8.634<br>51  | Tnpo2             |
| 67089                            | 1564 | 224 | 96.23% | 40.220<br>46 | 259 | 94.25% | 46.55<br>702 | Psmc6             |
| gi 160333862 ref N<br>M_011597.3 | 4557 | 224 | 81.11% | 13.803<br>99 | 278 | 84%    | 17.15<br>094 | -                 |
| 237459                           | 3643 | 224 | 81%    | 17.267<br>3  | 240 | 80.65% | 18.52<br>142 | Cdk17             |
| 53860                            | 3796 | 224 | 70.42% | 16.571<br>34 | 154 | 63.65% | 11.40<br>556 | 9-Sep             |
| 327826                           | 5701 | 224 | 73.16% | 11.033<br>99 | 163 | 61.76% | 8.038<br>198 | Frs2              |
| 26377                            | 3088 | 223 | 92.88% | 20.279<br>78 | 182 | 87.66% | 16.56<br>976 | Dapp1             |
| 24045                            | 1482 | 223 | 96.90% | 42.256<br>39 | 189 | 93.79% | 35.85<br>384 | Scamp3            |
| 75605                            | 6300 | 223 | 75.11% | 9.9403<br>12 | 183 | 62.41% | 8.166<br>438 | Kdm5b             |

|        |       |     |        |              |     |        |              |         |
|--------|-------|-----|--------|--------------|-----|--------|--------------|---------|
| 276950 | 4011  | 223 | 63.67% | 15.613<br>06 | 266 | 63.70% | 18.64<br>452 | Slfn8   |
| 78808  | 9074  | 223 | 54.32% | 6.9014<br>73 | 162 | 45.81% | 5.019<br>245 | Stxbp5  |
| 22670  | 3203  | 223 | 81.64% | 19.551<br>66 | 148 | 75.99% | 12.99<br>053 | Trim26  |
| 207615 | 4626  | 223 | 74.51% | 13.537<br>39 | 186 | 66.90% | 11.30<br>393 | Wdr37   |
| 54153  | 2911  | 223 | 89.42% | 21.512<br>87 | 180 | 85.33% | 17.38<br>411 | Rasa4   |
| 22289  | 5309  | 223 | 80.30% | 11.795<br>81 | 136 | 58.15% | 7.201<br>92  | Kdm6a   |
| 320528 | 11523 | 223 | 51.99% | 5.4346<br>93 | 167 | 39.09% | 4.074<br>488 | Vps13c  |
| 217869 | 3966  | 223 | 21.26% | 15.790<br>21 | 220 | 20.45% | 15.59<br>524 | Eif5    |
| 67043  | 2316  | 223 | 88.77% | 27.039<br>71 | 220 | 88.21% | 26.70<br>584 | Syap1   |
| 68188  | 4121  | 223 | 83.09% | 15.196<br>3  | 193 | 77.77% | 13.16<br>67  | Sympk   |
| 75991  | 4897  | 223 | 71.92% | 12.788<br>23 | 182 | 70.39% | 10.44<br>873 | Slain2  |
| 66111  | 1324  | 223 | 94.56% | 47.299<br>07 | 313 | 96%    | 66.46<br>277 | Tmed3   |
| 74841  | 4711  | 223 | 67.54% | 13.293<br>14 | 214 | 65.63% | 12.77<br>094 | Usp38   |
| 195018 | 11150 | 223 | 48.17% | 5.6164<br>99 | 140 | 35.17% | 3.530<br>005 | Zzef1   |
| 110796 | 5814  | 223 | 69.04% | 10.771<br>24 | 187 | 60.44% | 9.042<br>504 | Tshz1   |
| 192678 | 3425  | 222 | 87.15% | 18.202<br>38 | 181 | 78.86% | 14.85<br>731 | Rassf3  |
| 74206  | 7713  | 222 | 64.11% | 8.0828<br>66 | 172 | 54.03% | 6.269<br>418 | Sipa113 |
| 1E+08  | 1874  | 222 | 7.95%  | 33.267<br>42 | 195 | 4.70%  | 29.25<br>413 | Gm3245  |
| 15234  | 2755  | 222 | 94.08% | 22.629<br>09 | 110 | 78.19% | 11.22<br>518 | Hgf     |
| 56310  | 1220  | 222 | 95.98% | 51.100<br>94 | 235 | 95.25% | 54.15<br>395 | Gps2    |
| 338467 | 4237  | 222 | 79.63% | 14.713<br>98 | 159 | 74.13% | 10.55<br>02  | Morc3   |
| 13139  | 2842  | 222 | 86.56% | 21.936<br>36 | 161 | 77.94% | 15.92<br>663 | Dgka    |

|                                  |      |     |        |              |     |        |              |              |
|----------------------------------|------|-----|--------|--------------|-----|--------|--------------|--------------|
| 81489                            | 2284 | 222 | 90.46% | 27.295<br>6  | 246 | 85.77% | 30.28<br>037 | Dnajb1       |
| 71834                            | 5090 | 222 | 83.69% | 12.248<br>16 | 195 | 77.25% | 10.77<br>058 | Zbtb43       |
| 57354                            | 7534 | 221 | 63.39% | 8.2376<br>32 | 146 | 51.10% | 5.448<br>154 | Cramp11      |
| 66580                            | 3392 | 221 | 82.93% | 18.296<br>67 | 230 | 90.24% | 19.06<br>313 | Esf1         |
| gi 118129893 ref N<br>M_173028.3 | 9850 | 221 | 56.89% | 6.3007<br>43 | 118 | 39.16% | 3.367<br>968 | -            |
| 170718                           | 1520 | 221 | 92.50% | 40.830<br>47 | 226 | 95.59% | 41.80<br>103 | Idh3b        |
| 67064                            | 2529 | 221 | 90%    | 24.540<br>26 | 151 | 85.96% | 16.78<br>612 | Chmp1b       |
| 26896                            | 6861 | 221 | 68.52% | 9.0456<br>66 | 144 | 56.62% | 5.900<br>614 | Med14        |
| 114601                           | 6411 | 221 | 71.44% | 9.6805<br>98 | 130 | 58.26% | 5.700<br>851 | Ehbp111      |
| 20416                            | 3569 | 221 | 68.76% | 17.389<br>27 | 170 | 62.34% | 13.39<br>135 | Shc1         |
| 52163                            | 1434 | 220 | 93.86% | 43.083<br>33 | 254 | 95.40% | 49.79<br>74  | Camk1        |
| 15505                            | 3478 | 220 | 81.40% | 17.763<br>51 | 190 | 79.24% | 15.35<br>841 | Hsph1        |
| 230709                           | 3430 | 220 | 86.44% | 18.012<br>1  | 204 | 80.58% | 16.72<br>084 | Zmpste2<br>4 |
| 71302                            | 7899 | 220 | 67.44% | 7.8214<br>32 | 172 | 60.83% | 6.121<br>79  | Arhgap2<br>6 |
| 66881                            | 4291 | 220 | 74.30% | 14.397<br>92 | 188 | 70.47% | 12.31<br>747 | Pcyox1       |
| 14744                            | 2035 | 220 | 97.54% | 30.359<br>46 | 271 | 98.82% | 37.43<br>924 | Gpr65        |
| gi 118131159 ref N<br>M_007489.3 | 2904 | 220 | 89.50% | 21.274<br>62 | 133 | 82.68% | 12.87<br>589 | -            |
| 68036                            | 4485 | 220 | 50.39% | 13.775<br>14 | 196 | 53.44% | 12.28<br>615 | Zfp706       |
| 64930                            | 7697 | 220 | 72.17% | 8.0266<br>98 | 147 | 50.71% | 5.369<br>304 | Tsc1         |
| 11671                            | 3131 | 220 | 87.42% | 19.732<br>19 | 182 | 87.45% | 16.34<br>22  | Aldh3a2      |
| 26920                            | 7612 | 220 | 62.65% | 8.1163<br>28 | 151 | 52.50% | 5.576<br>995 | Cep110       |
| 74355                            | 7053 | 220 | 66.79% | 8.7596<br>05 | 147 | 52.22% | 5.859<br>568 | Smchd1       |

|                                     |       |     |        |              |     |        |              |                   |
|-------------------------------------|-------|-----|--------|--------------|-----|--------|--------------|-------------------|
| 77644                               | 3340  | 219 | 78.32% | 18.413<br>37 | 199 | 81.77% | 16.75<br>054 | C330007<br>P06Rik |
| 70248                               | 2096  | 219 | 86.98% | 29.341<br>92 | 207 | 82.06% | 27.76<br>522 | Dazap1            |
| 231207                              | 6823  | 219 | 62.61% | 9.0137<br>28 | 198 | 55.91% | 8.158<br>53  | Cpeb2             |
| 68750                               | 9714  | 219 | 53.35% | 6.3311<br>37 | 148 | 42.73% | 4.283<br>371 | Rreb1             |
| 268420                              | 6025  | 219 | 31.67% | 10.207<br>58 | 314 | 29.28% | 14.65<br>193 | Alkbh5            |
| 27008                               | 6708  | 219 | 66.98% | 9.1682<br>57 | 103 | 39.88% | 4.316<br>843 | Micall1           |
| 24071                               | 10398 | 219 | 43.75% | 5.9146<br>63 | 187 | 34.59% | 5.056<br>08  | Synj2bp           |
| gi 288541334 ref N<br>M_175465.5    | 3233  | 219 | 74.05% | 19.022<br>79 | 216 | 72.78% | 18.78<br>323 | -                 |
| 67155                               | 5831  | 219 | 75.42% | 10.547<br>19 | 147 | 55.75% | 7.087<br>554 | Smarca2           |
| 228355                              | 6151  | 219 | 73.14% | 9.9984<br>83 | 136 | 54.79% | 6.216<br>061 | Madd              |
| 52432                               | 2079  | 219 | 83.36% | 29.581<br>85 | 254 | 87.69% | 34.34<br>799 | Ppp2r2d           |
| 66576                               | 562   | 218 | 95.55% | 108.93<br>21 | 250 | 92.53% | 125.0<br>621 | Uqcrh             |
| gi 218931233 ref N<br>M_001127189.2 | 2727  | 218 | 73.27% | 22.449<br>52 | 146 | 67.73% | 15.05<br>185 | -                 |
| gi 148491085 ref N<br>M_198017.2    | 2908  | 218 | 94.43% | 21.052<br>22 | 142 | 84.77% | 13.72<br>828 | -                 |
| 22634                               | 5279  | 218 | 75.11% | 11.596<br>86 | 203 | 56.92% | 10.81<br>102 | Plag1             |
| gi 171184397 ref N<br>M_016722.3    | 2447  | 218 | 93.09% | 25.018<br>33 | 205 | 91.42% | 23.55<br>277 | -                 |
| 18777                               | 2447  | 218 | 83.65% | 25.018<br>33 | 171 | 78.79% | 19.64<br>646 | Lypla1            |
| 233979                              | 2909  | 218 | 84.46% | 21.044<br>98 | 176 | 78.07% | 17.00<br>948 | Tpcn2             |
| 80294                               | 2219  | 218 | 94.19% | 27.588<br>93 | 261 | 94.73% | 33.06<br>78  | Pofut2            |
| 27215                               | 3464  | 218 | 81.09% | 17.673<br>16 | 182 | 74.60% | 14.77<br>119 | Azi2              |
| 70466                               | 3154  | 218 | 88.14% | 19.410<br>22 | 487 | 91.12% | 43.40<br>996 | Ckap2l            |
| 20322                               | 2259  | 218 | 92.74% | 27.100<br>42 | 231 | 93.09% | 28.74<br>868 | Sord              |

|                                  |       |     |        |              |     |        |              |             |
|----------------------------------|-------|-----|--------|--------------|-----|--------|--------------|-------------|
| 58799                            | 4054  | 217 | 77.80% | 15.031<br>82 | 145 | 68.57% | 10.05<br>556 | Crbn        |
| 320365                           | 10753 | 217 | 50.77% | 5.6671<br>64 | 229 | 51.20% | 5.987<br>258 | Fry         |
| 53356                            | 1068  | 217 | 96.91% | 57.059       | 216 | 99.25% | 56.85<br>971 | Eif3g       |
| 230700                           | 4823  | 217 | 76.47% | 12.635<br>09 | 197 | 77.07% | 11.48<br>342 | Foxj3       |
| 16180                            | 4576  | 217 | 78.76% | 13.317<br>09 | 176 | 68.03% | 10.81<br>306 | Il1rap      |
| gi 119709816 ref N<br>M_010898.3 | 4708  | 217 | 80.82% | 12.943<br>72 | 165 | 65.97% | 9.853<br>026 | -           |
| 13205                            | 4571  | 217 | 11.29% | 13.331<br>66 | 133 | 11.31% | 8.180<br>174 | Ddx3x       |
| 19253                            | 1587  | 217 | 70.26% | 38.398<br>88 | 243 | 84.44% | 43.04<br>785 | Ptpn18      |
| 12370                            | 2585  | 217 | 78.18% | 23.574<br>09 | 175 | 79.23% | 19.03<br>267 | Casp8       |
| 320595                           | 6359  | 217 | 65.67% | 9.5831<br>13 | 140 | 55.56% | 6.189<br>582 | Phf8        |
| 67556                            | 7569  | 217 | 68.25% | 8.0511<br>32 | 156 | 55.45% | 5.794<br>397 | Pigm        |
| 216760                           | 4864  | 217 | 74.75% | 12.528<br>58 | 132 | 65.69% | 7.629<br>613 | Mfap3       |
| 382034                           | 6716  | 217 | 64.52% | 9.0737<br>07 | 182 | 55%    | 7.618<br>734 | Gse1        |
| 23996                            | 1436  | 217 | 95.68% | 42.436<br>64 | 234 | 94.71% | 45.81<br>245 | Psmc4       |
| 75617                            | 701   | 217 | 13.55% | 86.931<br>55 | 207 | 13.41% | 83.01<br>842 | Rps25       |
| 114713                           | 5699  | 216 | 79.63% | 10.643<br>66 | 200 | 71.43% | 9.866<br>28  | Rasa2       |
| gi 31543029 ref N<br>M_010598.2  | 3571  | 216 | 86.39% | 16.986<br>33 | 220 | 79.73% | 17.32<br>028 | -           |
| 320534                           | 4583  | 216 | 83.46% | 13.235<br>48 | 127 | 66.22% | 7.790<br>691 | Tmem10<br>4 |
| 12306                            | 1374  | 216 | 40.54% | 44.147<br>16 | 212 | 40.61% | 43.37<br>817 | Anxa2       |
| 20128                            | 3771  | 216 | 82.68% | 16.085<br>44 | 198 | 77.54% | 14.76<br>151 | Trim30a     |
| 24014                            | 4758  | 216 | 71.21% | 12.748<br>67 | 183 | 67.32% | 10.81<br>306 | Rnasel      |
| 67458                            | 2734  | 216 | 88.66% | 22.186<br>61 | 198 | 86.36% | 20.36<br>052 | Ergic1      |

|                              |       |     |        |              |     |        |              |             |
|------------------------------|-------|-----|--------|--------------|-----|--------|--------------|-------------|
| 75717                        | 6023  | 216 | 74.41% | 10.071<br>09 | 166 | 64.95% | 7.748<br>495 | Cul5        |
| 224897                       | 3509  | 215 | 88.40% | 17.206<br>43 | 210 | 85.78% | 16.82<br>512 | Dpp9        |
| gi 142376452 ref NM_026400.4 | 2513  | 215 | 49.62% | 24.026<br>01 | 149 | 47.15% | 16.66<br>924 | -           |
| 231861                       | 10266 | 215 | 54.67% | 5.8812<br>94 | 130 | 35.01% | 3.560<br>117 | Tnrc18      |
| 12660                        | 3644  | 215 | 46.05% | 16.568<br>98 | 278 | 45.94% | 21.44<br>809 | Chka        |
| 214812                       | 8602  | 215 | 64.50% | 7.0189<br>92 | 186 | 57.84% | 6.079<br>049 | Zfp609      |
| 19245                        | 3808  | 215 | 45.46% | 15.855<br>4  | 124 | 43.70% | 9.154<br>758 | Ptp4a3      |
| 213753                       | 3323  | 215 | 85.31% | 18.169<br>54 | 147 | 76.08% | 12.43<br>681 | Zfp598      |
| 50766                        | 5995  | 215 | 66.69% | 10.071<br>29 | 190 | 62.05% | 8.910<br>181 | Crim1       |
| 320951                       | 2150  | 214 | 76.47% | 27.951<br>88 | 215 | 70.93% | 28.11<br>397 | Pisd        |
| 66694                        | 1313  | 214 | 84.31% | 45.770<br>41 | 224 | 85.22% | 47.96<br>29  | Uqcrfs1     |
| 51886                        | 6491  | 214 | 62.22% | 9.2584<br>41 | 203 | 59.39% | 8.792<br>382 | Fubp1       |
| 219024                       | 2753  | 214 | 67.53% | 21.829<br>47 | 193 | 64.91% | 19.70<br>939 | Tmem55<br>b |
| 67439                        | 2654  | 214 | 93.03% | 22.643<br>76 | 175 | 89.75% | 18.53<br>785 | Xab2        |
| 56693                        | 1714  | 214 | 85.65% | 35.062<br>16 | 242 | 83.49% | 39.69<br>416 | Crtap       |
| 209630                       | 6780  | 214 | 61.87% | 8.8637<br>97 | 116 | 44.04% | 4.810<br>059 | Frmf4a      |
| 56551                        | 1282  | 214 | 98.28% | 46.877<br>18 | 203 | 95.63% | 44.51<br>743 | Txn2        |
| gi 117676380 ref NM_027933.2 | 2479  | 214 | 84.43% | 24.242<br>25 | 189 | 88.58% | 21.43<br>421 | -           |
| 271377                       | 4999  | 213 | 70.23% | 11.965<br>54 | 158 | 63.31% | 8.885<br>79  | Zbtb11      |
| 67480                        | 3326  | 213 | 87.97% | 17.984<br>28 | 246 | 92.36% | 20.79<br>385 | Cwc25       |
| 217430                       | 1928  | 213 | 91.55% | 31.024<br>75 | 203 | 92.01% | 29.60<br>132 | Pqlc3       |
| 72504                        | 5149  | 213 | 68.15% | 11.616<br>96 | 276 | 65.51% | 15.06<br>983 | Taf4b       |

|                                 |      |     |        |              |     |        |              |          |
|---------------------------------|------|-----|--------|--------------|-----|--------|--------------|----------|
| gi 40789238 ref N<br>M_027922.1 | 5241 | 213 | 78.95% | 11.413<br>04 | 125 | 58.27% | 6.705<br>296 | -        |
| 219140                          | 7533 | 213 | 54.44% | 7.9404<br>91 | 203 | 51.06% | 7.576<br>178 | Spata13  |
| 108143                          | 1248 | 213 | 51.60% | 47.929<br>26 | 230 | 50.32% | 51.81<br>26  | Taf9     |
| 330662                          | 6815 | 212 | 70.58% | 8.7358<br>61 | 236 | 70.49% | 9.735<br>724 | Dock1    |
| 276846                          | 2505 | 212 | 89.06% | 23.766<br>42 | 208 | 90.70% | 23.34<br>413 | Pigs     |
| 76895                           | 6351 | 212 | 55.41% | 9.3740<br>97 | 169 | 45.17% | 7.481<br>122 | Bicd2    |
| 69048                           | 3193 | 212 | 84.25% | 18.645<br>44 | 155 | 75.82% | 13.64<br>756 | Slc30a5  |
| 229004                          | 4050 | 212 | 81.51% | 14.699<br>97 | 171 | 76.37% | 11.87<br>034 | Gmeb2    |
| 94232                           | 3372 | 212 | 90.07% | 17.655<br>66 | 169 | 81.35% | 14.09<br>033 | Ubqln4   |
| 54354                           | 3421 | 212 | 71.56% | 17.402<br>77 | 139 | 69.16% | 11.42<br>31  | Rassf5   |
| 66913                           | 1870 | 212 | 87.54% | 31.836<br>84 | 235 | 95.61% | 35.33<br>039 | Kdelr2   |
| 101497                          | 5070 | 212 | 74.24% | 11.742<br>58 | 196 | 68.72% | 10.86<br>852 | Plekhg2  |
| 67023                           | 1087 | 212 | 81.32% | 54.769<br>91 | 203 | 80.40% | 52.50<br>354 | Use1     |
| 110749                          | 1913 | 211 | 90.28% | 30.974<br>42 | 324 | 94.15% | 47.61<br>592 | Chaf1b   |
| 192287                          | 3061 | 211 | 88.08% | 19.357<br>75 | 106 | 68.74% | 9.735<br>643 | Slc25a36 |
| 13478                           | 1920 | 211 | 92.40% | 30.861<br>49 | 157 | 85.68% | 22.98<br>902 | Dpagt1   |
| 19158                           | 2527 | 211 | 66.17% | 23.448<br>38 | 193 | 57.54% | 21.47<br>208 | Cyth2    |
| 19944                           | 710  | 211 | 40.42% | 83.456<br>43 | 220 | 41.83% | 87.11<br>37  | Rpl29    |
| 16568                           | 5438 | 211 | 76.88% | 10.896<br>3  | 116 | 55.74% | 5.997<br>095 | Kif3a    |
| 223827                          | 6534 | 210 | 68.41% | 9.0255<br>96 | 133 | 52.56% | 5.722<br>616 | Gxylt1   |
| 27361                           | 904  | 210 | 91.70% | 65.235<br>89 | 261 | 95.13% | 81.16<br>975 | Sepr1    |
| 218490                          | 1108 | 210 | 30.42% | 53.224<br>95 | 218 | 37.36% | 55.31<br>448 | Btf3     |



|                                     |      |     |        |              |     |        |              |              |
|-------------------------------------|------|-----|--------|--------------|-----|--------|--------------|--------------|
| 56353                               | 4376 | 210 | 32.36% | 13.476<br>52 | 199 | 32.34% | 12.78<br>492 | Rybp         |
| 66498                               | 2275 | 210 | 79.87% | 25.922<br>3  | 183 | 80.92% | 22.61<br>475 | Dda1         |
| gi 149253724 ref X<br>M_001476916.1 | 4942 | 210 | 49.60% | 11.933<br>07 | 136 | 47.77% | 7.736<br>745 | -            |
| 72029                               | 1898 | 210 | 93.15% | 31.071<br>26 | 174 | 92.52% | 25.77<br>36  | Cnpy3        |
| 67484                               | 2689 | 210 | 90.52% | 21.931<br>29 | 193 | 87.58% | 20.17<br>849 | Eepd1        |
| 27993                               | 2249 | 210 | 87.59% | 26.221<br>98 | 210 | 92.22% | 26.25<br>137 | Imp4         |
| 235441                              | 2201 | 210 | 96.73% | 26.793<br>84 | 148 | 96.59% | 18.90<br>444 | Usp3         |
| 14228                               | 2167 | 210 | 80.43% | 27.214<br>23 | 176 | 77.80% | 22.83<br>368 | Fkbp4        |
| 234699                              | 4663 | 210 | 80.21% | 12.647<br>06 | 172 | 71.95% | 10.37<br>015 | Edc4         |
| 67878                               | 6160 | 209 | 59.68% | 9.5279<br>9  | 169 | 58.91% | 7.713<br>085 | Tmem33       |
| 54645                               | 2937 | 209 | 88.22% | 19.983<br>8  | 157 | 78.72% | 15.02<br>858 | Gripap1      |
| 27223                               | 7722 | 209 | 55.37% | 7.6006<br>76 | 130 | 32.32% | 4.732<br>991 | Trp53bp<br>1 |
| 212167                              | 3745 | 209 | 85.15% | 15.672<br>21 | 250 | 87.02% | 18.76<br>767 | Pion         |
| 67465                               | 4916 | 209 | 63.97% | 11.939<br>06 | 170 | 67.09% | 9.722<br>079 | Sf3a1        |
| 633640                              | 1829 | 209 | 83.71% | 32.089<br>89 | 217 | 86.28% | 33.35<br>555 | Gm7120       |
| 50995                               | 2524 | 209 | 93.62% | 23.253<br>73 | 190 | 84.90% | 21.16<br>345 | Uba2         |
| 59028                               | 1803 | 209 | 92.85% | 32.552<br>64 | 140 | 89.30% | 21.83<br>003 | Rcl1         |
| 223701                              | 4366 | 209 | 78.08% | 13.443<br>06 | 109 | 62.67% | 7.018<br>833 | Mkl1         |
| 77031                               | 4510 | 209 | 81.26% | 13.013<br>84 | 192 | 79.27% | 11.96<br>87  | Slc9a8       |
| 22235                               | 2461 | 209 | 81.43% | 23.849<br>01 | 180 | 85.82% | 20.56<br>284 | Ugdh         |
| 226407                              | 4251 | 208 | 83.27% | 13.740<br>67 | 161 | 76.71% | 10.64<br>773 | Rab3gap<br>1 |
| 77264                               | 7472 | 208 | 58.98% | 7.8173<br>97 | 203 | 59.05% | 7.638<br>029 | Zfp142       |

|                                  |      |     |        |              |     |        |              |                   |
|----------------------------------|------|-----|--------|--------------|-----|--------|--------------|-------------------|
| 232314                           | 3641 | 208 | 38.07% | 16.042<br>73 | 211 | 41.39% | 16.29<br>236 | Ppp4r2            |
| gi 118130552 ref N<br>M_019678.2 | 1849 | 208 | 97.46% | 31.590<br>91 | 206 | 94.38% | 31.32<br>221 | -                 |
| 69089                            | 2534 | 208 | 76.09% | 23.051<br>14 | 139 | 77.66% | 15.42<br>163 | Oxa11             |
| 67118                            | 3010 | 208 | 91.43% | 19.405<br>84 | 222 | 84.78% | 20.73<br>522 | Bfar              |
| 54563                            | 7043 | 208 | 65%    | 8.2935<br>67 | 106 | 43.92% | 4.231<br>266 | Nup210            |
| gi 61098107 ref N<br>M_021310.2  | 4573 | 208 | 77.50% | 12.773<br>15 | 107 | 58.36% | 6.578<br>164 | -                 |
| 218333                           | 7675 | 208 | 65.17% | 7.6106<br>31 | 105 | 38.33% | 3.846<br>21  | BC0185<br>07      |
| 19219                            | 2831 | 208 | 90.14% | 20.632<br>85 | 265 | 92.69% | 26.31<br>65  | Ptger4            |
| 56495                            | 1280 | 208 | 93.83% | 45.634<br>06 | 203 | 90.47% | 44.58<br>699 | Asna1             |
| 109815                           | 1208 | 208 | 88.25% | 48.353<br>97 | 211 | 90.48% | 49.10<br>635 | H47               |
| 14043                            | 2875 | 208 | 95.97% | 20.317<br>08 | 242 | 94.19% | 23.66<br>463 | Ext2              |
| 68272                            | 4201 | 207 | 78.74% | 13.837<br>36 | 161 | 76.24% | 10.77<br>446 | Rbm28             |
| 72190                            | 5164 | 207 | 71.61% | 11.256<br>93 | 173 | 63.23% | 9.418<br>505 | 2510009<br>E07Rik |
| 209586                           | 3977 | 207 | 75.23% | 14.616<br>74 | 142 | 69.07% | 10.03<br>818 | Nudcd3            |
| 57915                            | 5433 | 207 | 63.17% | 10.699<br>57 | 218 | 61.73% | 11.28<br>077 | Tbc1d1            |
| 20909                            | 1372 | 207 | 92.86% | 42.369<br>36 | 199 | 90.09% | 40.77<br>755 | Stx4a             |
| 73178                            | 4348 | 207 | 74.31% | 13.369<br>54 | 193 | 73.55% | 12.47<br>929 | Wasl              |
| 12995                            | 4208 | 207 | 43.20% | 13.814<br>35 | 162 | 43.23% | 10.82<br>334 | Csnk2a1           |
| 67418                            | 2910 | 207 | 88.42% | 19.976<br>21 | 189 | 92.34% | 18.25<br>959 | Ppil4             |
| 14998                            | 786  | 207 | 99.11% | 73.957<br>72 | 219 | 98.85% | 78.33<br>281 | H2-DMa            |
| 14726                            | 1769 | 206 | 78.69% | 32.702<br>06 | 138 | 76.37% | 21.93<br>175 | Pdpm              |
| 321006                           | 5392 | 206 | 70.36% | 10.728<br>85 | 161 | 59.07% | 8.394<br>563 | Vprbp             |

|                                  |       |     |        |              |     |        |              |                   |
|----------------------------------|-------|-----|--------|--------------|-----|--------|--------------|-------------------|
| 76901                            | 6100  | 206 | 74.49% | 9.4835<br>97 | 134 | 56.33% | 6.175<br>855 | Phf15             |
| 22040                            | 1074  | 206 | 89.48% | 53.864<br>01 | 556 | 92.64% | 145.5<br>434 | Trex1             |
| 71963                            | 2432  | 206 | 82.81% | 23.786<br>98 | 256 | 77.51% | 29.59<br>365 | Cdca4             |
| 66404                            | 2142  | 206 | 95%    | 27.007<br>44 | 169 | 92.72% | 22.18<br>142 | 2410001<br>C21Rik |
| 107338                           | 6422  | 205 | 69.88% | 8.9643<br>6  | 155 | 59.55% | 6.785<br>526 | Gbf1              |
| 67841                            | 2013  | 205 | 67.51% | 28.598<br>67 | 200 | 64.13% | 27.93<br>241 | Atg3              |
| 140580                           | 2221  | 205 | 54.89% | 25.920<br>36 | 219 | 52.81% | 27.72<br>156 | Elmo1             |
| 227620                           | 1690  | 205 | 96.86% | 34.064<br>57 | 176 | 97.87% | 29.27<br>845 | Uap111            |
| 21847                            | 3045  | 205 | 87.19% | 18.906<br>11 | 184 | 86.11% | 16.98<br>841 | Klf10             |
| 13714                            | 3671  | 205 | 85.73% | 15.682<br>13 | 98  | 68.46% | 7.505<br>227 | Elk4              |
| 102866                           | 3251  | 204 | 84.47% | 17.621<br>74 | 110 | 68.78% | 9.512<br>569 | Pls3              |
| 237336                           | 2880  | 204 | 79.65% | 19.891<br>77 | 197 | 80.66% | 19.23<br>073 | Tbp11             |
| 66070                            | 1152  | 204 | 88.19% | 49.729<br>42 | 216 | 88.80% | 52.71<br>369 | Cwc15             |
| gi 160333608 ref N<br>R_003967.1 | 17291 | 204 | 14.34% | 3.3131<br>86 | 243 | 15.38% | 3.951<br>011 | -                 |
| 22084                            | 6147  | 204 | 64.47% | 9.3197<br>16 | 179 | 60.27% | 8.186<br>758 | Tsc2              |
| 26416                            | 3605  | 204 | 81.78% | 15.891<br>34 | 193 | 77.92% | 15.05<br>131 | Mapk14            |
| 15925                            | 5104  | 204 | 79.68% | 11.224<br>2  | 120 | 61.32% | 6.609<br>867 | Ide               |
| 105782                           | 5547  | 204 | 69.77% | 10.327<br>8  | 138 | 55.36% | 6.994<br>28  | Scrib             |
| 67647                            | 4035  | 204 | 78.39% | 14.197<br>84 | 104 | 61.56% | 7.246<br>227 | 4930523<br>C07Rik |
| 16709                            | 4511  | 204 | 81.64% | 12.699<br>69 | 156 | 69.34% | 9.722<br>409 | Ktn1              |
| 26444                            | 881   | 203 | 95.80% | 64.707<br>68 | 207 | 96.37% | 66.05<br>665 | PsmA7             |
| 18518                            | 1518  | 203 | 87.22% | 37.554<br>33 | 208 | 84.65% | 38.52<br>243 | Igfbp1            |

|                                 |      |     |        |              |     |        |              |                   |
|---------------------------------|------|-----|--------|--------------|-----|--------|--------------|-------------------|
| 20352                           | 3946 | 203 | 75.90% | 14.446<br>9  | 146 | 65%    | 10.40<br>202 | Sema4b            |
| 76220                           | 4308 | 203 | 73.14% | 13.232<br>93 | 158 | 70.98% | 10.31<br>106 | 6530402<br>F18Rik |
| 112406                          | 2124 | 203 | 93.36% | 26.839<br>67 | 155 | 90.21% | 20.51<br>631 | Egln2             |
| 67739                           | 2526 | 203 | 81.16% | 22.568<br>28 | 218 | 85.31% | 24.26<br>304 | Slc48a1           |
| 13356                           | 4099 | 203 | 78.73% | 13.907<br>65 | 172 | 82.07% | 11.79<br>703 | Dgcr2             |
| 103534                          | 2429 | 203 | 92.05% | 23.469<br>52 | 116 | 76.95% | 13.42<br>618 | Mgat4b            |
| 70510                           | 1538 | 203 | 95.90% | 37.065<br>97 | 189 | 95.38% | 34.54<br>837 | Rnf167            |
| 263876                          | 3996 | 202 | 85.16% | 14.195<br>86 | 205 | 81.23% | 14.42<br>283 | Spata2            |
| 80743                           | 3206 | 202 | 73.49% | 17.693<br>9  | 204 | 71.62% | 17.88<br>911 | Vps16             |
| 104401                          | 7281 | 202 | 51.45% | 7.7910<br>51 | 153 | 44.53% | 5.907<br>756 | Pcnx13            |
| gi 21450218 ref N<br>M_144832.1 | 2439 | 202 | 90.53% | 23.258<br>16 | 123 | 79.79% | 14.17<br>801 | -                 |
| 77864                           | 4902 | 202 | 76.09% | 11.572<br>14 | 158 | 71.26% | 9.061<br>621 | Ypel2             |
| 211499                          | 2927 | 202 | 85.99% | 19.380<br>47 | 144 | 71.44% | 13.83<br>126 | Tmem87<br>a       |
| 74164                           | 4556 | 202 | 73.07% | 12.450<br>98 | 111 | 54.37% | 6.849<br>54  | Nfx1              |
| 19732                           | 2967 | 201 | 86.48% | 19.024<br>54 | 181 | 80.35% | 17.15<br>075 | Rgl2              |
| 67778                           | 2038 | 201 | 85.23% | 27.696<br>67 | 142 | 80.96% | 19.58<br>873 | Zfp639            |
| 67857                           | 1583 | 201 | 94.88% | 35.657<br>5  | 208 | 93.24% | 36.94<br>065 | Ppp6c             |
| 68552                           | 2084 | 201 | 70.63% | 27.085<br>33 | 190 | 62.96% | 25.63<br>173 | 1110003<br>E01Rik |
| 16439                           | 8347 | 201 | 62.13% | 6.7624<br>08 | 209 | 53.11% | 7.039<br>438 | Itpr2             |
| 68497                           | 5476 | 201 | 72.70% | 10.307<br>86 | 122 | 58.09% | 6.263<br>521 | 1110018<br>G07Rik |
| 97112                           | 1739 | 201 | 94.59% | 32.458<br>78 | 220 | 93.39% | 35.56<br>683 | Nmd3              |
| 104394                          | 2024 | 201 | 93.18% | 27.888<br>25 | 193 | 92.54% | 26.80<br>828 | E2f4              |

|                                 |      |     |        |              |     |        |              |               |
|---------------------------------|------|-----|--------|--------------|-----|--------|--------------|---------------|
| 208228                          | 2687 | 201 | 91.59% | 21.007       | 132 | 80.24% | 13.81<br>11  | Mob3a         |
| 21423                           | 3320 | 201 | 73.31% | 17.001<br>75 | 132 | 67.71% | 11.17<br>784 | Tcf3          |
| 217353                          | 2913 | 201 | 88.29% | 19.377<br>21 | 152 | 81.12% | 14.66<br>983 | Tmc6          |
| 53314                           | 904  | 200 | 95.13% | 62.129<br>42 | 277 | 95.24% | 86.14<br>567 | Batf          |
| 243846                          | 2183 | 200 | 77.55% | 25.728<br>35 | 181 | 67.75% | 23.31<br>025 | Ccdc9         |
| 21411                           | 7364 | 200 | 66.28% | 7.6269<br>68 | 135 | 50.72% | 5.153<br>973 | Tcf20         |
| 19166                           | 963  | 200 | 76.01% | 58.322<br>94 | 241 | 80.17% | 70.35<br>79  | Psma2         |
| 20844                           | 3720 | 200 | 74.95% | 15.098<br>12 | 175 | 77.18% | 13.22<br>566 | Stam          |
| 27279                           | 980  | 200 | 92.86% | 57.311<br>22 | 337 | 94.69% | 96.67<br>762 | Tnfrsf12<br>a |
| 269593                          | 7529 | 200 | 60.57% | 7.4598<br>21 | 178 | 58.02% | 6.646<br>681 | Luzp1         |
| gi 28395017 ref N<br>M_010593.1 | 3226 | 200 | 90.70% | 17.410<br>1  | 331 | 92.16% | 28.84<br>601 | -             |
| 80290                           | 4145 | 200 | 80.70% | 13.550<br>06 | 149 | 68.06% | 10.10<br>611 | Gpr146        |
| 72843                           | 3935 | 200 | 76.32% | 14.273<br>19 | 165 | 72.40% | 11.78<br>858 | Prdm4         |
| 101739                          | 3182 | 200 | 80.74% | 17.650<br>85 | 156 | 79.82% | 13.78<br>309 | Psip1         |
| 223775                          | 2419 | 200 | 82.10% | 23.218<br>27 | 309 | 81.52% | 35.91<br>242 | Pim3          |
| 21754                           | 3620 | 200 | 56.66% | 15.515<br>19 | 121 | 51.46% | 9.397<br>21  | Tesk1         |
| 218215                          | 4576 | 200 | 81.69% | 12.273<br>82 | 105 | 60.34% | 6.450<br>976 | Rnf144b       |
| 67785                           | 7022 | 200 | 68.81% | 7.9984<br>32 | 138 | 58.60% | 5.525<br>103 | Zmym4         |
| 320982                          | 3967 | 199 | 21.96% | 14.087<br>26 | 133 | 22.16% | 9.425<br>655 | Arl4c         |
| 100561                          | 2720 | 199 | 90.29% | 20.545<br>65 | 122 | 83.93% | 12.60<br>994 | Slc15a4       |
| 98396                           | 4675 | 199 | 74.05% | 11.953<br>83 | 158 | 70.61% | 9.501<br>619 | Slc41a1       |
| 54204                           | 1466 | 199 | 96.04% | 38.120<br>17 | 124 | 95.91% | 23.77<br>989 | 1-Sep         |

|                              |      |     |        |              |     |        |              |                   |
|------------------------------|------|-----|--------|--------------|-----|--------|--------------|-------------------|
| 18795                        | 7116 | 199 | 66.19% | 7.8533<br>12 | 117 | 47.18% | 4.622<br>448 | Pleb1             |
| 77805                        | 4540 | 199 | 74.03% | 12.309<br>29 | 119 | 55.97% | 7.369<br>079 | Esco1             |
| gi 118130146 ref NM_010804.3 | 4886 | 199 | 77.63% | 11.437<br>61 | 135 | 65.06% | 7.767<br>878 | -                 |
| 78885                        | 3518 | 199 | 90.85% | 15.885<br>21 | 129 | 81.81% | 10.30<br>899 | Coro7             |
| 11545                        | 3845 | 199 | 87.62% | 14.534<br>24 | 124 | 70.87% | 9.066<br>663 | Parp1             |
| 67073                        | 3165 | 199 | 79.87% | 17.656<br>92 | 146 | 71.31% | 12.96<br>884 | Pi4k2b            |
| 74122                        | 2850 | 199 | 90.11% | 19.608<br>48 | 177 | 92.35% | 17.46<br>025 | Tmem43            |
| 15162                        | 2107 | 198 | 89.37% | 26.389<br>82 | 202 | 89.18% | 26.95<br>311 | Hck               |
| 68879                        | 3071 | 198 | 90.46% | 18.105<br>94 | 140 | 78.54% | 12.81<br>653 | Prpf6             |
| 216190                       | 2958 | 198 | 83.37% | 18.797<br>61 | 198 | 84.18% | 18.81<br>868 | Appl2             |
| 102162                       | 2893 | 198 | 90.43% | 19.219<br>96 | 196 | 89.94% | 19.04<br>714 | Taf5l             |
| 326622                       | 5174 | 198 | 76.25% | 10.746<br>68 | 166 | 72.03% | 9.019<br>943 | Upf2              |
| gi 19882246 ref NM_028412.1  | 2756 | 198 | 88.13% | 20.175<br>38 | 177 | 84.80% | 18.05<br>578 | -                 |
| 18676                        | 5260 | 198 | 76.14% | 10.570<br>98 | 183 | 72.95% | 9.781<br>095 | Phf2              |
| gi 226874894 ref NM_013625.3 | 5516 | 198 | 25.02% | 10.080<br>37 | 183 | 25.36% | 9.327<br>15  | -                 |
| 71765                        | 2139 | 198 | 93.64% | 25.995<br>02 | 172 | 89.53% | 22.60<br>684 | Klhdc3            |
| 50887                        | 1911 | 198 | 70.43% | 29.096<br>46 | 283 | 70.64% | 41.63<br>397 | Hmgn5             |
| 226421                       | 2539 | 198 | 95.04% | 21.899<br>7  | 286 | 94.60% | 31.66<br>835 | 5430435<br>G22Rik |
| 11891                        | 2971 | 198 | 86.03% | 18.715<br>36 | 254 | 89.20% | 24.03<br>55  | Rab27a            |
| 231506                       | 4596 | 198 | 77.48% | 12.098<br>2  | 188 | 77.20% | 11.50<br>006 | Lin54             |
| 17068                        | 694  | 198 | 89.34% | 80.120<br>09 | 140 | 96.69% | 56.71<br>405 | Ly6d              |
| 109672                       | 749  | 198 | 96.80% | 74.236<br>77 | 201 | 98.13% | 75.44<br>602 | Cyb5              |

|                              |       |     |        |              |     |        |              |         |
|------------------------------|-------|-----|--------|--------------|-----|--------|--------------|---------|
| 18106                        | 3758  | 197 | 34.67% | 14.721<br>27 | 238 | 35.87% | 17.80<br>501 | Cd244   |
| 55932                        | 2639  | 197 | 84.50% | 20.963<br>44 | 235 | 84.84% | 25.03<br>517 | Gbp3    |
| gi 118130545 ref NM_178116.3 | 4473  | 197 | 64.16% | 12.368<br>1  | 96  | 56.92% | 6.033<br>849 | -       |
| 67117                        | 2153  | 197 | 90.34% | 25.695<br>55 | 212 | 91.83% | 27.68<br>305 | Dynlt3  |
| 59029                        | 1560  | 197 | 94.49% | 35.463<br>15 | 160 | 89.36% | 28.83<br>484 | Psm14   |
| 68083                        | 1753  | 197 | 82.72% | 31.558<br>77 | 172 | 81.86% | 27.58<br>472 | Pak1ip1 |
| 71393                        | 1667  | 197 | 83.20% | 33.186<br>87 | 261 | 80.68% | 44.01<br>767 | Kctd6   |
| 67948                        | 4932  | 197 | 76.20% | 11.217<br>06 | 190 | 74.49% | 10.83<br>06  | Fbxo28  |
| 67125                        | 1543  | 197 | 97.02% | 35.853<br>87 | 235 | 92.87% | 42.81<br>777 | Tspan31 |
| 103466                       | 5967  | 197 | 67.55% | 9.2714<br>12 | 217 | 75.13% | 10.22<br>412 | Nt5dc3  |
| 60611                        | 5013  | 197 | 76.60% | 11.035<br>81 | 121 | 54.22% | 6.785<br>936 | Foxj2   |
| 69823                        | 4397  | 197 | 73.23% | 12.581<br>88 | 173 | 69.73% | 11.06<br>144 | Fytd1   |
| 56462                        | 1918  | 197 | 79.61% | 28.843<br>86 | 230 | 81.44% | 33.71<br>331 | Mtch1   |
| 19714                        | 10666 | 197 | 49.62% | 5.1868<br>1  | 148 | 35.93% | 3.901<br>057 | Rev3l   |
| 53381                        | 975   | 197 | 96.82% | 56.741<br>04 | 219 | 91.59% | 63.14<br>829 | Prdx4   |
| 238386                       | 4325  | 197 | 80.12% | 12.791<br>33 | 127 | 68.02% | 8.255<br>431 | Btd7    |
| 381650                       | 3673  | 197 | 84.59% | 15.061<br>94 | 144 | 71.11% | 11.02<br>208 | Thap6   |
| 216987                       | 3871  | 196 | 79.18% | 14.218<br>99 | 158 | 74.01% | 11.47<br>509 | Utp6    |
| 106298                       | 3607  | 196 | 84.39% | 15.259<br>69 | 175 | 78.49% | 13.63<br>999 | Rrn3    |
| 22088                        | 1832  | 196 | 80.95% | 30.044<br>59 | 199 | 82.97% | 30.53<br>864 | Tsg101  |
| 56426                        | 1870  | 196 | 79.47% | 29.434<br>06 | 260 | 88.13% | 39.08<br>894 | Pdcd10  |
| 66109                        | 1923  | 196 | 92.20% | 28.622<br>83 | 165 | 93.40% | 24.12<br>275 | Tspan13 |

|                                  |      |     |        |              |     |        |              |              |
|----------------------------------|------|-----|--------|--------------|-----|--------|--------------|--------------|
| 13136                            | 2527 | 196 | 81.20% | 21.781<br>44 | 81  | 58.45% | 9.011<br>6   | Cd55         |
| 219148                           | 4252 | 196 | 73.10% | 12.944<br>89 | 141 | 66.44% | 9.322<br>834 | Fam167a      |
| 56248                            | 2776 | 196 | 85.91% | 19.827<br>7  | 192 | 86.38% | 19.44<br>482 | Ak3          |
| 16563                            | 4250 | 196 | 77.88% | 12.950<br>99 | 167 | 71.55% | 11.04<br>713 | Kif2a        |
| 13726                            | 1303 | 196 | 90.48% | 42.242<br>28 | 184 | 85.57% | 39.70<br>046 | Emd          |
| 12390                            | 2473 | 196 | 90.30% | 22.257<br>05 | 212 | 85.28% | 24.10<br>093 | Cav2         |
| 21685                            | 4267 | 195 | 77.97% | 12.833<br>58 | 238 | 81.74% | 15.68<br>11  | Tef          |
| 14388                            | 4877 | 195 | 73.61% | 11.228<br>39 | 166 | 67.21% | 9.569<br>24  | Gab1         |
| 94213                            | 2507 | 195 | 86.16% | 21.843<br>19 | 193 | 81.97% | 21.64<br>338 | Ddx50        |
| 26412                            | 2466 | 195 | 93.43% | 22.206<br>35 | 148 | 82.64% | 16.87<br>294 | Map4k2       |
| 270058                           | 3284 | 195 | 87.03% | 16.675<br>05 | 133 | 68.61% | 11.38<br>599 | Mtap1s       |
| 70233                            | 3284 | 195 | 78.50% | 16.675<br>05 | 172 | 75.58% | 14.72<br>473 | Cd2bp2       |
| 76577                            | 4322 | 195 | 80.40% | 12.670<br>26 | 152 | 73.81% | 9.887<br>374 | Faf2         |
| 17916                            | 3833 | 195 | 83.49% | 14.286<br>69 | 187 | 84.56% | 13.71<br>592 | Myo1f        |
| 20354                            | 4377 | 195 | 81.40% | 12.511<br>05 | 116 | 61.75% | 7.450<br>811 | Sema4d       |
| gi 146134489 reflN<br>M_010754.4 | 2512 | 195 | 84.79% | 21.799<br>71 | 184 | 80.73% | 20.59<br>303 | -            |
| 17346                            | 2493 | 195 | 93.70% | 21.965<br>85 | 170 | 91.26% | 19.17<br>118 | Mknk1        |
| 23950                            | 2708 | 195 | 25.63% | 20.221<br>89 | 257 | 26.14% | 26.68<br>128 | Dnajb6       |
| 76707                            | 7827 | 195 | 57.12% | 6.9964<br>06 | 128 | 40.85% | 4.597<br>659 | Clasp1       |
| 12028                            | 869  | 195 | 85.96% | 63.015<br>96 | 186 | 83.43% | 60.17<br>489 | Bax          |
| 67920                            | 1857 | 195 | 88.42% | 29.488<br>89 | 158 | 85.78% | 23.92<br>034 | Mak16        |
| 260409                           | 1967 | 195 | 91.76% | 27.839<br>79 | 306 | 92.12% | 43.73<br>601 | Cdc42ep<br>3 |



|                                     |      |     |        |              |     |        |              |              |
|-------------------------------------|------|-----|--------|--------------|-----|--------|--------------|--------------|
| gi 149261507 ref X<br>M_001480481.1 | 2526 | 195 | 29.93% | 21.678<br>89 | 320 | 30.01% | 35.61<br>548 | -            |
| 79264                               | 6352 | 194 | 46.30% | 8.5768<br>33 | 165 | 42.71% | 7.302<br>904 | Krit1        |
| 78656                               | 4677 | 194 | 61.98% | 11.648<br>5  | 117 | 60.25% | 7.033        | Brd8         |
| 70561                               | 4028 | 194 | 68.20% | 13.525<br>33 | 152 | 64.70% | 10.60<br>904 | Txndc16      |
| 223828                              | 4023 | 194 | 79.77% | 13.542<br>14 | 156 | 70.92% | 10.90<br>176 | Pphln1       |
| 56613                               | 3120 | 194 | 82.44% | 17.461<br>55 | 215 | 80.74% | 19.37<br>341 | Rps6ka4      |
| 21982                               | 1896 | 194 | 80.12% | 28.734<br>2  | 183 | 74.84% | 27.13<br>532 | Tmem16<br>5  |
| 50912                               | 2803 | 194 | 93.01% | 19.436<br>33 | 250 | 94.26% | 25.07<br>489 | Exosc10      |
| 26932                               | 4841 | 194 | 75.01% | 11.253<br>88 | 171 | 72.96% | 9.930<br>775 | Ppp2r5e      |
| 59041                               | 3254 | 194 | 56.12% | 16.742<br>48 | 139 | 53.20% | 12.00<br>935 | Stk25        |
| 21961                               | 9966 | 194 | 52.77% | 5.4665<br>91 | 108 | 34.33% | 3.046<br>667 | Tns1         |
| 230936                              | 3128 | 194 | 88.20% | 17.416<br>89 | 174 | 81.71% | 15.63<br>884 | Phf13        |
| 20085                               | 629  | 193 | 40.38% | 86.167<br>28 | 193 | 26.87% | 86.26<br>384 | Rps19        |
| gi 142370571 ref N<br>M_011405.3    | 2278 | 193 | 81.08% | 23.792<br>46 | 242 | 84.24% | 29.86<br>646 | -            |
| 24105                               | 2410 | 193 | 96.56% | 22.489<br>3  | 160 | 90.04% | 18.66<br>487 | Rbck1        |
| 11846                               | 1489 | 193 | 88.18% | 36.399<br>74 | 408 | 95.90% | 77.03<br>491 | Arg1         |
| 433667                              | 2678 | 193 | 87.64% | 20.238<br>69 | 185 | 84.06% | 19.42<br>152 | Ankrd13<br>c |
| 67487                               | 3724 | 192 | 80.26% | 14.478<br>62 | 187 | 87.22% | 14.11<br>738 | Dhx40        |
| 353342                              | 4745 | 192 | 70.83% | 11.363<br>2  | 134 | 61.24% | 7.939<br>455 | Peg13        |
| 12506                               | 1142 | 192 | 94.05% | 47.214       | 206 | 93.61% | 50.71<br>346 | Cd48         |
| 22200                               | 2443 | 192 | 81.91% | 22.070<br>57 | 140 | 72.86% | 16.11<br>116 | Uba3         |
| gi 149270841 ref X<br>R_030935.1    | 6434 | 192 | 46.29% | 8.3802<br>29 | 172 | 40.97% | 7.515<br>701 | -            |

|                                 |       |     |        |              |     |        |              |                   |
|---------------------------------|-------|-----|--------|--------------|-----|--------|--------------|-------------------|
| 22214                           | 4657  | 192 | 40.61% | 11.577<br>92 | 208 | 34.92% | 12.55<br>681 | Ube2h             |
| 66058                           | 1064  | 192 | 98.50% | 50.675<br>18 | 277 | 96.62% | 73.19<br>143 | Tmem17<br>6a      |
| 18669                           | 4344  | 192 | 72.47% | 12.412<br>15 | 212 | 70.19% | 13.72<br>044 | Abcb1b            |
| 75553                           | 3556  | 192 | 62.04% | 15.162<br>65 | 147 | 60.12% | 11.62<br>192 | Zc3h14            |
| 21682                           | 2656  | 192 | 88.70% | 20.300<br>6  | 138 | 86.33% | 14.60<br>741 | Tec               |
| 71702                           | 2994  | 192 | 62.02% | 18.008<br>82 | 164 | 61.96% | 15.39<br>977 | Cdc5l             |
| 101148                          | 4147  | 192 | 77.60% | 13.001<br>78 | 185 | 72.08% | 12.54<br>18  | B630005<br>N14Rik |
| 71900                           | 6099  | 192 | 64.16% | 8.8405<br>3  | 101 | 50.75% | 4.655<br>699 | Tmem10<br>6b      |
| 12443                           | 3796  | 192 | 78.79% | 14.204       | 309 | 88.33% | 22.88<br>518 | Ccnd1             |
| 109674                          | 3650  | 191 | 81.21% | 14.695<br>22 | 142 | 77.40% | 10.93<br>749 | Ampd2             |
| 22770                           | 5212  | 191 | 72.91% | 10.291<br>17 | 162 | 68.38% | 8.738<br>416 | Zhx1              |
| gi 142383958 ref NM_026360.2    | 1751  | 191 | 95.43% | 30.632<br>53 | 147 | 89.21% | 23.60<br>224 | -                 |
| gi 124486856 ref NM_001081282.1 | 5550  | 191 | 72.34% | 9.6644<br>27 | 133 | 54.65% | 6.737<br>221 | -                 |
| gi 125347388 ref NM_009054.2    | 2329  | 191 | 74.02% | 23.030<br>3  | 132 | 74.50% | 15.93<br>406 | -                 |
| 27058                           | 1388  | 191 | 88.62% | 38.643<br>78 | 196 | 90.49% | 39.69<br>984 | Srp9              |
| 12557                           | 3475  | 191 | 89.55% | 15.435<br>27 | 134 | 72.89% | 10.84<br>107 | Cdh17             |
| 66357                           | 1081  | 191 | 89.18% | 49.618<br>47 | 227 | 89.08% | 59.03<br>673 | Ostc              |
| 110253                          | 7352  | 191 | 33.22% | 7.2956<br>43 | 130 | 28.25% | 4.971<br>186 | Triobp            |
| 226255                          | 6596  | 191 | 65.34% | 8.1318<br>33 | 144 | 51.26% | 6.137<br>676 | Atml1             |
| gi 45439303 ref NM_010414.1     | 10081 | 191 | 51.90% | 5.3206<br>59 | 102 | 33.01% | 2.844<br>583 | -                 |
| 50907                           | 5505  | 191 | 48.94% | 9.7434<br>27 | 181 | 45.83% | 9.243<br>647 | Preb              |
| 104175                          | 4092  | 191 | 83.58% | 13.107<br>91 | 101 | 61.51% | 6.939<br>175 | Sbk1              |

|                                  |      |     |        |              |     |        |              |                   |
|----------------------------------|------|-----|--------|--------------|-----|--------|--------------|-------------------|
| 108654                           | 9669 | 191 | 52.51% | 5.5473<br>75 | 113 | 38.04% | 3.285<br>633 | 4933403<br>F05Rik |
| 70387                            | 3470 | 191 | 84.87% | 15.457<br>51 | 142 | 73.54% | 11.50<br>485 | Ttc9c             |
| 75739                            | 4975 | 191 | 70.71% | 10.781<br>42 | 119 | 53.61% | 6.724<br>748 | Mpp7              |
| 12576                            | 2405 | 191 | 84.95% | 22.302<br>52 | 165 | 83.87% | 19.28<br>817 | Cdkn1b            |
| gi 146134475 ref N<br>M_016893.4 | 3051 | 190 | 80.96% | 17.488<br>28 | 192 | 89.64% | 17.69<br>217 | -                 |
| 16440                            | 9012 | 190 | 58.41% | 5.9206<br>33 | 105 | 37.65% | 3.275<br>595 | Itpr3             |
| 244668                           | 6365 | 190 | 59.59% | 8.3828<br>35 | 187 | 55.38% | 8.259<br>72  | Sipa112           |
| 71517                            | 3578 | 190 | 80.55% | 14.912<br>45 | 157 | 73.76% | 12.33<br>62  | 9030624<br>J02Rik |
| 20624                            | 3400 | 190 | 84.26% | 15.693<br>16 | 151 | 78.85% | 12.48<br>591 | Eftud2            |
| 73473                            | 9623 | 190 | 51.02% | 5.5447<br>1  | 145 | 35.95% | 4.236<br>231 | Iws1              |
| 75273                            | 3463 | 190 | 83.92% | 15.407<br>66 | 144 | 75.25% | 11.69<br>047 | Pelp1             |
| 22110                            | 2696 | 190 | 84.83% | 19.791<br>08 | 144 | 78.26% | 15.01<br>636 | Tspy11            |
| gi 19527301 ref N<br>M_134076.1  | 2351 | 190 | 92.05% | 22.695<br>34 | 130 | 87.07% | 15.54<br>579 | -                 |
| 353258                           | 1784 | 190 | 95.01% | 29.908<br>49 | 222 | 94.56% | 34.98<br>487 | Ltv1              |
| 14706                            | 2976 | 190 | 87.13% | 17.929<br>01 | 103 | 68.92% | 9.730<br>304 | Gng4              |
| 106073                           | 1742 | 189 | 89.27% | 30.468<br>38 | 159 | 86.74% | 25.66<br>085 | Mfsd5             |
| 19179                            | 1502 | 189 | 90.55% | 35.336<br>83 | 178 | 88.95% | 33.31<br>748 | Psmc1             |
| 12315                            | 2233 | 189 | 84.86% | 23.768<br>88 | 181 | 84.73% | 22.78<br>83  | Calm3             |
| 269378                           | 2560 | 189 | 67.07% | 20.732<br>78 | 151 | 73.71% | 16.58<br>285 | Ahcy              |
| 11883                            | 3491 | 189 | 69.01% | 15.203<br>64 | 211 | 68.98% | 16.99<br>24  | Arsa              |
| 67581                            | 3664 | 189 | 81.74% | 14.485<br>79 | 165 | 73.20% | 12.66<br>049 | Tbc1d23           |
| 56786                            | 1685 | 189 | 92.28% | 31.499<br>06 | 162 | 83.98% | 27.02<br>945 | Tmem9b            |

|                                 |       |     |        |              |     |        |              |                   |
|---------------------------------|-------|-----|--------|--------------|-----|--------|--------------|-------------------|
| 212127                          | 4322  | 189 | 76.49% | 12.280<br>41 | 199 | 81.56% | 12.94<br>465 | Proser1           |
| 74159                           | 3746  | 189 | 78.51% | 14.168<br>69 | 150 | 69.62% | 11.25<br>759 | Acbd5             |
| 207352                          | 4578  | 189 | 74.60% | 11.593<br>69 | 152 | 69.62% | 9.334<br>475 | Sec23ip           |
| 73122                           | 5565  | 188 | 71.45% | 9.4869<br>89 | 127 | 57.02% | 6.415<br>946 | Tgfbrap1          |
| 56531                           | 7050  | 188 | 65.59% | 7.4886<br>66 | 136 | 55.40% | 5.423<br>403 | Ylpm1             |
| 12054                           | 1678  | 188 | 86.65% | 31.463<br>11 | 197 | 90.64% | 33.00<br>627 | Bcl7b             |
| 19274                           | 5569  | 188 | 70.53% | 9.4801<br>75 | 228 | 76.17% | 11.51<br>012 | Ptprm             |
| 94192                           | 2084  | 188 | 84.98% | 25.333<br>54 | 94  | 75.19% | 12.68<br>096 | C1galt1           |
| 52132                           | 2986  | 188 | 90.46% | 17.680<br>88 | 155 | 85.77% | 14.59<br>365 | Ccdc97            |
| 18763                           | 14170 | 188 | 37.30% | 3.7258<br>36 | 94  | 19.60% | 1.865<br>006 | Pkd1              |
| 26382                           | 2634  | 188 | 90.74% | 20.043<br>7  | 77  | 57.29% | 8.218<br>585 | Fgd2              |
| 71452                           | 3493  | 188 | 81.82% | 15.114<br>54 | 130 | 73.12% | 10.46<br>326 | Ankrd40           |
| 67971                           | 1040  | 188 | 94.04% | 50.764<br>51 | 60  | 85%    | 16.21<br>96  | Tppp3             |
| 14191                           | 3353  | 188 | 87.06% | 15.745<br>63 | 182 | 84.19% | 15.26<br>019 | Fgr               |
| 69221                           | 461   | 188 | 97.61% | 114.52<br>3  | 185 | 91.76% | 112.8<br>218 | 2410006<br>H16Rik |
| 214048                          | 1705  | 188 | 95.43% | 30.964<br>86 | 178 | 94.49% | 29.35<br>065 | Larp1b            |
| 330171                          | 3098  | 188 | 64.69% | 17.041<br>67 | 141 | 59.94% | 12.79<br>558 | Kctd10            |
| 208846                          | 6004  | 188 | 67.32% | 8.7933<br>2  | 107 | 51.20% | 5.010<br>317 | Daam1             |
| gi 56549086 ref N<br>M_174990.3 | 1810  | 188 | 56.08% | 29.168<br>56 | 93  | 55.08% | 14.44<br>53  | -                 |
| 208154                          | 3235  | 187 | 87.57% | 16.233<br>16 | 82  | 63.52% | 7.126<br>26  | Btla              |
| 320484                          | 3677  | 187 | 75.22% | 14.281<br>82 | 122 | 60.35% | 9.327<br>995 | Rasal3            |
| 66917                           | 2205  | 187 | 90.02% | 23.815<br>99 | 165 | 86.71% | 21.03<br>766 | Chordc1           |

|                              |       |     |        |              |     |        |              |          |
|------------------------------|-------|-----|--------|--------------|-----|--------|--------------|----------|
| 52700                        | 1446  | 187 | 53.67% | 36.316<br>92 | 189 | 53.67% | 36.74<br>647 | Txndc17  |
| 13688                        | 1786  | 187 | 93.45% | 29.403<br>29 | 81  | 83.31% | 12.75<br>045 | Eif4ebp2 |
| gi 146198717 ref NM_172779.3 | 3766  | 187 | 75.15% | 13.944<br>31 | 186 | 75.15% | 13.88<br>528 | -        |
| 170755                       | 5517  | 187 | 56.73% | 9.5186<br>28 | 169 | 50.50% | 8.612<br>036 | Sgk3     |
| 19882                        | 4706  | 186 | 72.38% | 11.099<br>33 | 224 | 68.44% | 13.38<br>191 | Mst1r    |
| 18754                        | 6254  | 186 | 59.64% | 8.3520<br>06 | 220 | 64.21% | 9.889<br>787 | Prkce    |
| 15510                        | 2347  | 186 | 37.71% | 22.255<br>41 | 184 | 40.69% | 22.04<br>077 | Hspd1    |
| 75901                        | 5616  | 186 | 77.53% | 9.3008<br>27 | 128 | 56.13% | 6.407<br>742 | Dep1a    |
| 27277                        | 2689  | 186 | 92.34% | 19.424<br>86 | 117 | 85.16% | 12.23<br>255 | Golga5   |
| 14792                        | 2502  | 186 | 75.06% | 20.876<br>68 | 193 | 78.14% | 21.68<br>663 | Lpcat3   |
| 75316                        | 1381  | 186 | 76.76% | 37.822<br>91 | 219 | 81.61% | 44.58<br>334 | Taf1d    |
| 231464                       | 3171  | 186 | 86.19% | 16.472<br>23 | 175 | 82.72% | 15.51<br>543 | Cnot6l   |
| 26419                        | 5770  | 186 | 52.67% | 9.0525<br>9  | 132 | 41.13% | 6.431<br>618 | Mapk8    |
| 67035                        | 2702  | 186 | 71.84% | 19.331<br>4  | 274 | 70.47% | 28.50<br>935 | Dnajb4   |
| 171504                       | 3615  | 185 | 83.26% | 14.371<br>4  | 234 | 90.84% | 18.19<br>825 | Apobr    |
| 11984                        | 1151  | 185 | 20.85% | 45.136<br>94 | 176 | 20.94% | 42.98<br>921 | Atp6v0c  |
| 108077                       | 3972  | 185 | 83.61% | 13.079<br>71 | 153 | 71%    | 10.82<br>94  | Skiv2l   |
| 242418                       | 7226  | 185 | 62.01% | 7.1896<br>79 | 174 | 56.45% | 6.769<br>762 | Dcaf10   |
| 270627                       | 8060  | 185 | 53.34% | 6.4457<br>34 | 120 | 45.20% | 4.185<br>702 | Taf1     |
| 229584                       | 7642  | 185 | 60.57% | 6.7983<br>01 | 145 | 52.94% | 5.334<br>369 | Pogz     |
| 13003                        | 12432 | 185 | 38.77% | 4.1789<br>43 | 96  | 26.80% | 2.170<br>963 | Vcan     |
| 68035                        | 1701  | 185 | 94.47% | 30.542<br>4  | 168 | 92.42% | 27.76<br>688 | Rbm42    |

|                                  |      |     |        |              |     |        |              |              |
|----------------------------------|------|-----|--------|--------------|-----|--------|--------------|--------------|
| 69019                            | 1022 | 185 | 64.97% | 50.834<br>26 | 246 | 67.71% | 67.67<br>158 | Spes1        |
| 268417                           | 4059 | 185 | 76.62% | 12.799<br>36 | 166 | 72.73% | 11.49<br>77  | Zkscan1<br>7 |
| 235623                           | 4310 | 185 | 79.93% | 12.053<br>97 | 153 | 70.05% | 9.980<br>132 | Scap         |
| 73744                            | 3221 | 185 | 87.30% | 16.129<br>34 | 159 | 83.58% | 13.87<br>805 | Man2c1       |
| 66090                            | 1057 | 184 | 94.51% | 48.885<br>33 | 137 | 84.01% | 36.43<br>91  | Ypel3        |
| 140579                           | 4636 | 184 | 61.37% | 11.145<br>77 | 105 | 52.83% | 6.367<br>486 | Elmo2        |
| 217826                           | 3112 | 184 | 83.03% | 16.604<br>05 | 165 | 74.04% | 14.90<br>618 | Kcnk13       |
| 20849                            | 2981 | 184 | 76.65% | 17.333<br>71 | 151 | 73.53% | 14.24<br>089 | Stat4        |
| 26411                            | 2699 | 184 | 89.14% | 19.144<br>79 | 90  | 74.32% | 9.374<br>794 | Map4k1       |
| 21429                            | 4704 | 184 | 64.97% | 10.984<br>65 | 114 | 54.12% | 6.813<br>334 | Ubtf         |
| 74157                            | 3754 | 184 | 74.61% | 13.764<br>46 | 107 | 67.16% | 8.013<br>304 | Ftsjd2       |
| 16913                            | 1223 | 184 | 84.46% | 42.250<br>04 | 167 | 81.68% | 38.38<br>947 | Psmb8        |
| 234959                           | 3914 | 184 | 53.83% | 13.201<br>79 | 161 | 56.90% | 11.56<br>451 | Med17        |
| 72750                            | 5532 | 184 | 57.30% | 9.3405<br>27 | 139 | 50.36% | 7.064<br>066 | Fam117b      |
| 239555                           | 5099 | 184 | 72.47% | 10.133<br>71 | 131 | 59.72% | 7.222<br>847 | Smcr7l       |
| 12333                            | 3119 | 183 | 87.37% | 16.476<br>75 | 109 | 65.02% | 9.825<br>015 | Capn1        |
| 228961                           | 2110 | 183 | 89.15% | 24.355<br>91 | 116 | 81.99% | 15.45<br>602 | Npepl1       |
| 56632                            | 3790 | 183 | 59.71% | 13.559<br>62 | 142 | 56.52% | 10.53<br>346 | Sphk2        |
| 22030                            | 2998 | 183 | 73.32% | 17.141<br>75 | 151 | 71.61% | 14.16<br>014 | Traf2        |
| gi 142362932 ref N<br>M_026071.2 | 1496 | 183 | 94.18% | 34.352<br>25 | 146 | 93.32% | 27.43<br>743 | -            |
| 75751                            | 3611 | 182 | 87.09% | 14.154<br>01 | 162 | 74%    | 12.61<br>275 | Ipo4         |
| 108937                           | 7157 | 182 | 60.46% | 7.1412<br>8  | 110 | 49.69% | 4.320<br>995 | Rnf169       |

|                              |      |     |        |              |     |        |              |         |
|------------------------------|------|-----|--------|--------------|-----|--------|--------------|---------|
| 75452                        | 2623 | 182 | 91.27% | 19.485<br>38 | 135 | 86.69% | 14.46<br>964 | Ascc2   |
| 14670                        | 2744 | 182 | 80.87% | 18.626<br>15 | 204 | 80.28% | 20.90<br>105 | Gn11    |
| 104721                       | 2488 | 182 | 91.28% | 20.542<br>66 | 181 | 85.49% | 20.45<br>268 | Ddx1    |
| 106025                       | 1747 | 182 | 91.76% | 29.255<br>95 | 144 | 79.91% | 23.17<br>35  | Sharpin |
| 29816                        | 4402 | 182 | 75.67% | 11.610<br>66 | 90  | 51.16% | 5.747<br>971 | Hip1r   |
| gi 118130198 ref NM_011306.3 | 2577 | 182 | 91.50% | 19.833<br>19 | 127 | 69.89% | 13.85<br>516 | -       |
| 56298                        | 3521 | 182 | 72.59% | 14.515<br>8  | 202 | 83.41% | 16.12<br>9   | At12    |
| 103425                       | 2893 | 182 | 89.84% | 17.666<br>83 | 126 | 78.64% | 12.24<br>459 | Ncln    |
| 13875                        | 3503 | 182 | 57.52% | 14.590<br>39 | 200 | 60.63% | 16.05<br>137 | Erf     |
| 66390                        | 1403 | 182 | 97.29% | 36.429<br>18 | 190 | 91.23% | 38.07<br>308 | Slmo2   |
| 234023                       | 1731 | 182 | 82.32% | 29.526<br>37 | 175 | 73.43% | 28.42<br>255 | Arglu1  |
| 13025                        | 1157 | 182 | 88.25% | 44.174<br>71 | 241 | 90.67% | 58.56<br>064 | Ctla2b  |
| 399603                       | 5563 | 182 | 61.37% | 9.1875<br>15 | 116 | 46.45% | 5.862<br>341 | Fam84b  |
| 13542                        | 3365 | 182 | 72.69% | 15.188<br>75 | 165 | 76.76% | 13.78<br>545 | Dvl1    |
| 56422                        | 2793 | 181 | 74.29% | 18.198<br>83 | 144 | 69.17% | 14.49<br>485 | Hbs11   |
| 98386                        | 3568 | 181 | 75.20% | 14.245<br>89 | 147 | 75.87% | 11.58<br>283 | Lbr     |
| 99138                        | 3118 | 181 | 87.72% | 16.301<br>9  | 116 | 73.32% | 10.45<br>933 | Stard7  |
| 13713                        | 4234 | 181 | 75.11% | 12.005<br>04 | 172 | 73.05% | 11.42<br>088 | Elk3    |
| 13138                        | 4415 | 181 | 79.23% | 11.512<br>87 | 131 | 70.12% | 8.341<br>856 | Dag1    |
| 54712                        | 7059 | 181 | 38.50% | 7.2006<br>4  | 100 | 33.59% | 3.982<br>712 | Plxnc1  |
| 70380                        | 1753 | 181 | 90.87% | 28.995<br>62 | 166 | 89.33% | 26.62<br>247 | Mospd1  |
| 56044                        | 2662 | 181 | 79.60% | 19.094<br>41 | 132 | 69.12% | 13.94<br>081 | Rala    |

|        |       |     |        |              |     |        |              |         |
|--------|-------|-----|--------|--------------|-----|--------|--------------|---------|
| 74039  | 2759  | 181 | 78.25% | 18.423<br>09 | 154 | 75.61% | 15.69<br>246 | Nfam1   |
| 58246  | 3697  | 181 | 78.09% | 13.748<br>8  | 112 | 67.87% | 8.517<br>079 | Slc35b4 |
| 12748  | 2310  | 181 | 77.79% | 22.004<br>03 | 124 | 82.99% | 15.09<br>148 | Cik2    |
| 333433 | 4393  | 181 | 70.04% | 11.570<br>53 | 115 | 58.87% | 7.359<br>677 | Gpd11   |
| 170719 | 4616  | 181 | 69.67% | 11.011<br>55 | 123 | 64.41% | 7.491<br>373 | Oxr1    |
| 68196  | 1178  | 181 | 95.59% | 43.148<br>83 | 214 | 95.08% | 51.07<br>291 | Hsbp1   |
| 217154 | 3049  | 181 | 85.27% | 16.670<br>82 | 135 | 75.80% | 12.44<br>797 | Stac2   |
| 67011  | 1905  | 181 | 97.17% | 26.682<br>06 | 189 | 99.11% | 27.89<br>26  | Mettl6  |
| 93765  | 3851  | 181 | 41%    | 13.198<br>99 | 217 | 52.09% | 15.84<br>194 | Ube2n   |
| 57896  | 1819  | 180 | 71.96% | 27.789<br>17 | 144 | 72.57% | 22.25<br>625 | Krcc1   |
| 66943  | 3254  | 180 | 19.48% | 15.534<br>26 | 277 | 15.86% | 23.93<br>229 | Pqlc1   |
| 12864  | 527   | 180 | 69.64% | 95.917<br>44 | 210 | 67.93% | 112.0<br>291 | Cox6c   |
| 14470  | 875   | 180 | 87.20% | 57.769<br>71 | 155 | 90.97% | 49.80<br>188 | Rabac1  |
| 22710  | 3164  | 180 | 43.62% | 15.976<br>14 | 115 | 42.64% | 10.21<br>841 | Zfp52   |
| 12725  | 5781  | 180 | 70.73% | 8.7439<br>01 | 84  | 41.05% | 4.085<br>06  | Cln3    |
| 11479  | 3277  | 180 | 81.81% | 15.425<br>23 | 92  | 63.87% | 7.892<br>844 | Acvr1b  |
| 107607 | 4327  | 180 | 77.33% | 11.682<br>11 | 193 | 79.76% | 12.53<br>986 | Nod1    |
| 55936  | 5606  | 180 | 46.59% | 9.0168<br>56 | 182 | 43.90% | 9.127<br>26  | Ctps2   |
| 67588  | 4394  | 180 | 64.13% | 11.503<br>98 | 102 | 55.12% | 6.526<br>228 | Rnf41   |
| 20850  | 3910  | 180 | 68.59% | 12.928       | 161 | 61.69% | 11.57<br>634 | Stat5a  |
| 14260  | 11925 | 180 | 44.03% | 4.2388<br>67 | 116 | 34.31% | 2.734<br>776 | Fmn1    |
| 19177  | 969   | 179 | 99.17% | 51.875<br>82 | 208 | 95.15% | 60.34<br>783 | Psmb7   |



|                              |       |     |        |              |     |        |              |                |
|------------------------------|-------|-----|--------|--------------|-----|--------|--------------|----------------|
| 70533                        | 3111  | 179 | 73.90% | 16.158<br>04 | 174 | 77.56% | 15.72<br>43  | Btf314         |
| 140887                       | 4543  | 179 | 78.16% | 11.064<br>86 | 121 | 60.60% | 7.487<br>981 | Lnx2           |
| 664862                       | 2956  | 179 | 60.32% | 17.005<br>3  | 123 | 57.85% | 11.69<br>83  | Gpr137b<br>-ps |
| 667118                       | 5007  | 179 | 75.05% | 10.039<br>48 | 68  | 44.78% | 3.818<br>154 | Zbed6          |
| 434197                       | 2831  | 179 | 82.27% | 17.756<br>15 | 94  | 68.39% | 9.334<br>909 | Fam169b        |
| 71764                        | 4334  | 179 | 69.34% | 11.598<br>45 | 125 | 63.59% | 8.108<br>55  | C2cd2l         |
| 19216                        | 2082  | 179 | 96.16% | 24.143<br>93 | 137 | 86.98% | 18.49<br>958 | Ptger1         |
| 66922                        | 2289  | 179 | 90.56% | 21.960<br>54 | 159 | 78.03% | 19.52<br>871 | Rras2          |
| 104130                       | 853   | 179 | 91.68% | 58.930<br>44 | 176 | 90.86% | 58.00<br>771 | Ndufb11        |
| 18950                        | 2941  | 179 | 24.18% | 17.092<br>03 | 259 | 20.88% | 24.75<br>864 | Pnp            |
| gi 118131059 ref NM_144954.2 | 2191  | 179 | 88.64% | 22.942<br>8  | 140 | 81.24% | 17.96<br>42  | -              |
| 83435                        | 3007  | 179 | 66.71% | 16.716<br>88 | 155 | 69.60% | 14.49<br>174 | Plekha3        |
| 668880                       | 15202 | 179 | 37.63% | 3.3066<br>48 | 111 | 24.40% | 2.052<br>789 | Stard9         |
| 338337                       | 4222  | 179 | 85.91% | 11.906<br>13 | 131 | 69.16% | 8.723<br>187 | Cog3           |
| 70699                        | 6244  | 179 | 63.90% | 8.0505<br>55 | 120 | 45.77% | 5.403<br>068 | Nup205         |
| 19419                        | 5155  | 179 | 72.49% | 9.7512<br>45 | 66  | 40.97% | 3.599<br>46  | Rasgrp1        |
| 69742                        | 1298  | 178 | 88.60% | 38.510<br>67 | 231 | 91.06% | 50.03<br>333 | Tm2d2          |
| 66530                        | 1714  | 178 | 94.52% | 29.163<br>85 | 146 | 91.07% | 23.94<br>772 | Ubxn6          |
| 171171                       | 1770  | 178 | 88.76% | 28.241<br>15 | 158 | 88.25% | 25.09<br>608 | Ntng2          |
| 14391                        | 2598  | 178 | 88.91% | 19.240<br>51 | 151 | 84.10% | 16.34<br>03  | Gabpb1         |
| 94230                        | 4538  | 178 | 69.04% | 11.015<br>17 | 138 | 68.14% | 8.549<br>421 | Cpsf1          |
| 104303                       | 842   | 178 | 95.96% | 59.366<br>8  | 142 | 97.39% | 47.41<br>31  | Arl1           |

|        |      |     |        |              |     |        |              |                   |
|--------|------|-----|--------|--------------|-----|--------|--------------|-------------------|
| 21745  | 8163 | 178 | 34.07% | 6.1235<br>87 | 163 | 25.92% | 5.613<br>839 | Tep1              |
| 666123 | 3083 | 178 | 46.38% | 16.213<br>7  | 180 | 42.59% | 16.41<br>425 | Gm7938            |
| 208795 | 3239 | 178 | 88.79% | 15.432<br>8  | 175 | 87.84% | 15.18<br>97  | Tmem63<br>a       |
| 53328  | 1838 | 178 | 93.85% | 27.196<br>32 | 161 | 94.94% | 24.62<br>649 | Pgrmc1            |
| 22224  | 3236 | 178 | 84.27% | 15.447<br>11 | 175 | 88.66% | 15.20<br>378 | Usp10             |
| 19069  | 2450 | 178 | 85.51% | 20.402<br>79 | 147 | 84.04% | 16.86<br>838 | Nup88             |
| 17955  | 2283 | 178 | 91.55% | 21.895<br>24 | 169 | 91.81% | 20.81<br>148 | Nap114            |
| 381269 | 2493 | 178 | 86.96% | 20.050<br>88 | 107 | 75.05% | 12.06<br>656 | Mreg              |
| 23980  | 1217 | 177 | 95.56% | 40.843<br>07 | 166 | 95.81% | 38.34<br>773 | Pebp1             |
| 14367  | 6930 | 177 | 56.62% | 7.1725<br>86 | 197 | 53.62% | 7.991<br>993 | Fzd5              |
| 233545 | 4031 | 177 | 81.49% | 12.330<br>94 | 157 | 74.42% | 10.94<br>987 | 2210018<br>M11Rik |
| 66818  | 2842 | 177 | 75.19% | 17.489<br>8  | 199 | 82.09% | 19.68<br>571 | 9130011<br>J15Rik |
| 235134 | 5181 | 177 | 66.94% | 9.5939<br>04 | 129 | 57.46% | 7.000<br>003 | Nfrkb             |
| 269536 | 3203 | 177 | 81.70% | 15.518<br>58 | 116 | 71.78% | 10.18<br>177 | Tex10             |
| 240754 | 2371 | 177 | 92.91% | 20.964<br>16 | 107 | 73.47% | 12.68<br>745 | Lax1              |
| 73112  | 826  | 177 | 86.44% | 60.176<br>78 | 249 | 88.50% | 84.75<br>033 | 3110003<br>A17Rik |
| 328133 | 5247 | 177 | 69.81% | 9.4732<br>26 | 151 | 65.05% | 8.090<br>735 | Slc39a9           |
| 26417  | 1772 | 177 | 90.29% | 28.050<br>8  | 143 | 86.12% | 22.68<br>791 | Mapk3             |
| 17260  | 6427 | 177 | 60.57% | 7.7339<br>38 | 164 | 62.50% | 7.173<br>939 | Mef2c             |
| 56692  | 1263 | 176 | 59.70% | 39.133<br>17 | 202 | 55.66% | 44.96<br>454 | Lamtor3           |
| 71520  | 1599 | 176 | 98.75% | 30.910<br>06 | 109 | 89.49% | 19.16<br>462 | Grap              |
| 66914  | 885  | 176 | 95.71% | 55.847<br>68 | 186 | 94.80% | 59.08<br>698 | Vps28             |

|                                     |      |     |        |              |     |        |              |                   |
|-------------------------------------|------|-----|--------|--------------|-----|--------|--------------|-------------------|
| 13543                               | 2937 | 176 | 84.34% | 16.828<br>46 | 121 | 72.76% | 11.58<br>253 | Dvl2              |
| 20019                               | 6145 | 176 | 69.02% | 8.0431<br>56 | 147 | 55.39% | 6.725<br>391 | Polr1a            |
| 26556                               | 4637 | 176 | 74.73% | 10.658<br>87 | 176 | 75.61% | 10.67<br>082 | Homer1            |
| 110109                              | 2626 | 176 | 86.44% | 18.821<br>48 | 156 | 85.03% | 16.70<br>137 | Nop2              |
| 56384                               | 3480 | 176 | 67.76% | 14.202<br>64 | 127 | 56.44% | 10.25<br>998 | Letm1             |
| 74777                               | 3461 | 176 | 79.83% | 14.280<br>61 | 166 | 75.38% | 13.48<br>431 | Sepr1             |
| 18975                               | 4596 | 176 | 70.91% | 10.753<br>96 | 134 | 62.05% | 8.196<br>848 | Polg              |
| 105372                              | 4071 | 176 | 73.32% | 12.140<br>8  | 178 | 74.75% | 12.29<br>252 | Utp15             |
| gi 141803005 ref N<br>M_013663.4    | 2566 | 176 | 55.61% | 19.261<br>57 | 148 | 56.66% | 16.21<br>538 | -                 |
| 18222                               | 1962 | 176 | 89.25% | 25.191<br>23 | 137 | 84.86% | 19.63<br>106 | Numb              |
| 69882                               | 3103 | 176 | 68.42% | 15.928<br>2  | 244 | 70.32% | 22.10<br>702 | 2010321<br>M09Rik |
| 56430                               | 4531 | 176 | 71.15% | 10.908<br>23 | 150 | 63.30% | 9.307<br>206 | Clip1             |
| gi 149259232 ref X<br>M_001476285.1 | 5542 | 176 | 60.56% | 8.9182<br>95 | 158 | 51.08% | 8.015<br>169 | -                 |
| 229055                              | 7464 | 176 | 54.35% | 6.6218<br>1  | 119 | 45.18% | 4.482<br>264 | Zbtb10            |
| 140858                              | 2916 | 176 | 86.56% | 16.949<br>65 | 179 | 82.92% | 17.25<br>789 | Wdr5              |
| 67803                               | 2950 | 176 | 56.31% | 16.754<br>3  | 151 | 52.78% | 14.39<br>054 | Limd2             |
| 228993                              | 2197 | 176 | 86.98% | 22.496<br>67 | 138 | 88.21% | 17.65<br>92  | Slc17a9           |
| 67333                               | 6204 | 175 | 68.18% | 7.9214       | 192 | 71.12% | 8.700<br>647 | Stk35             |
| 71177                               | 3071 | 175 | 78.70% | 16.002<br>72 | 213 | 87.72% | 19.49<br>943 | Spata30           |
| 629242                              | 3740 | 175 | 48.93% | 13.140<br>21 | 104 | 39.84% | 7.817<br>787 | Gm6958            |
| 11432                               | 4669 | 175 | 69.31% | 10.525<br>67 | 176 | 69.35% | 10.59<br>768 | Acp2              |
| 13716                               | 3085 | 175 | 87.29% | 15.930<br>1  | 130 | 81.56% | 11.84<br>705 | Ell               |

|        |      |     |        |              |     |        |              |         |
|--------|------|-----|--------|--------------|-----|--------|--------------|---------|
| 69930  | 4190 | 175 | 80.19% | 11.728<br>97 | 94  | 57.61% | 6.307<br>19  | Zfp715  |
| 20530  | 1824 | 175 | 96.27% | 26.943<br>18 | 155 | 85.31% | 23.89<br>071 | Slc31a2 |
| 78913  | 7737 | 175 | 56.97% | 6.3518<br>64 | 108 | 43.56% | 3.924<br>4   | Ltn1    |
| 226432 | 6236 | 175 | 68.55% | 7.8807<br>52 | 101 | 50.79% | 4.553<br>417 | Ipo9    |
| 72900  | 1472 | 175 | 57.88% | 33.386<br>12 | 151 | 62.57% | 28.83<br>973 | Ndufv2  |
| 108105 | 4872 | 175 | 65.68% | 10.087<br>1  | 104 | 55.38% | 6.001<br>339 | B3gnt5  |
| 28114  | 4279 | 175 | 55.64% | 11.485<br>01 | 149 | 54.31% | 9.789<br>626 | Nsun2   |
| 74194  | 2827 | 174 | 91.26% | 17.284<br>59 | 259 | 85.32% | 25.75<br>705 | Rnd3    |
| 57908  | 7818 | 174 | 59.53% | 6.2501<br>33 | 91  | 35.50% | 3.272<br>411 | Zfp318  |
| 71779  | 4521 | 174 | 75.93% | 10.808<br>13 | 112 | 60.23% | 6.964<br>752 | 8-Mar   |
| 380753 | 2567 | 174 | 69.46% | 19.035<br>27 | 169 | 69.30% | 18.50<br>9   | Atxn711 |
| 73656  | 1844 | 174 | 93.33% | 26.498<br>67 | 110 | 86.77% | 16.77<br>08  | Ms4a6c  |
| 67949  | 1894 | 174 | 92.98% | 25.799<br>13 | 163 | 90.02% | 24.19<br>523 | Mki67ip |
| 241274 | 4592 | 174 | 80.12% | 10.641<br>02 | 136 | 61.41% | 8.326<br>436 | Pnpla7  |
| 94178  | 2039 | 174 | 91.37% | 23.964<br>46 | 148 | 89.60% | 20.40<br>641 | Mcoln1  |
| 52683  | 3330 | 174 | 63.63% | 14.673<br>74 | 162 | 65.41% | 13.67<br>706 | Ncaph2  |
| 68904  | 5074 | 174 | 64.94% | 9.6301<br>82 | 105 | 52.88% | 5.817<br>829 | Abhd13  |
| 110880 | 6598 | 174 | 61.56% | 7.4058<br>11 | 132 | 46.44% | 5.624<br>498 | Scn4a   |
| 74769  | 4854 | 174 | 71.26% | 10.066<br>66 | 144 | 66.25% | 8.340<br>361 | Pik3cb  |
| 78912  | 3056 | 174 | 88.58% | 15.989<br>38 | 123 | 79.52% | 11.31<br>55  | Sp2     |
| 102857 | 3992 | 174 | 78.58% | 12.240<br>37 | 166 | 67.28% | 11.69<br>068 | Slc6a8  |
| 54194  | 2097 | 174 | 87.03% | 23.301<br>64 | 169 | 91.03% | 22.65<br>742 | Akap81  |

|        |      |     |        |              |     |        |              |              |
|--------|------|-----|--------|--------------|-----|--------|--------------|--------------|
| 107650 | 3692 | 174 | 81.04% | 13.234<br>98 | 129 | 68.63% | 9.823<br>136 | Pi4kb        |
| 228140 | 5781 | 174 | 64.90% | 8.4524<br>38 | 118 | 50.18% | 5.738<br>537 | Tnks1bp<br>1 |
| 269587 | 6565 | 174 | 35.51% | 7.4430<br>38 | 81  | 27.52% | 3.468<br>745 | Epb4.1       |
| 73024  | 1072 | 174 | 92.54% | 45.581<br>66 | 180 | 93%    | 47.20<br>629 | Emc7         |
| 83673  | 476  | 174 | 93.07% | 102.65<br>45 | 165 | 95.38% | 97.45<br>387 | Snhg1        |
| 11950  | 1486 | 174 | 53.03% | 32.882<br>6  | 172 | 54.24% | 32.54<br>106 | Atp5f1       |
| 228866 | 2752 | 174 | 89.93% | 17.755<br>65 | 121 | 81.36% | 12.36<br>116 | Pcif1        |
| 59057  | 3143 | 173 | 79.19% | 15.457<br>44 | 95  | 59.97% | 8.497<br>699 | Zfp191       |
| 69125  | 2035 | 173 | 93.22% | 23.873<br>57 | 143 | 87.62% | 19.75<br>576 | Cnot8        |
| 76788  | 5883 | 173 | 71.29% | 8.2581<br>54 | 161 | 66.50% | 7.693<br>946 | Klhdc10      |
| 73124  | 4149 | 173 | 70.60% | 11.709<br>5  | 155 | 65.03% | 10.50<br>293 | Golim4       |
| 71914  | 3776 | 173 | 81.06% | 12.866<br>19 | 153 | 75.05% | 11.39<br>152 | Antxr2       |
| 72416  | 4638 | 173 | 76.43% | 10.474<br>93 | 140 | 63.39% | 8.486<br>32  | Lrpprc       |
| 56699  | 3263 | 173 | 72.26% | 14.888<br>97 | 363 | 86.42% | 31.27<br>603 | Cdc42ep<br>4 |
| 56434  | 1747 | 173 | 92.96% | 27.809<br>23 | 148 | 90.96% | 23.81<br>721 | Tspan3       |
| 22380  | 3452 | 173 | 67.35% | 14.073<br>79 | 140 | 61.12% | 11.40<br>196 | Wbp4         |
| 66256  | 1183 | 173 | 83.69% | 41.067<br>39 | 213 | 86.39% | 50.61<br>94  | Ssr2         |
| 56752  | 2834 | 173 | 72.44% | 17.142<br>81 | 137 | 70.92% | 13.59<br>073 | Aldh9a1      |
| 66925  | 1287 | 173 | 90.99% | 37.748<br>81 | 190 | 91.22% | 41.50<br>469 | Sdhhd        |
| 18569  | 2418 | 173 | 77.58% | 20.092<br>11 | 134 | 71.55% | 15.58<br>011 | Pdcd4        |
| 78394  | 3180 | 173 | 85.06% | 15.277<br>58 | 204 | 87.01% | 18.03<br>537 | Ddx52        |
| 81897  | 3471 | 173 | 79.98% | 13.996<br>75 | 71  | 56.41% | 5.750<br>768 | Tlr9         |

|                                  |      |     |        |              |     |        |              |             |
|----------------------------------|------|-----|--------|--------------|-----|--------|--------------|-------------|
| 72554                            | 2431 | 173 | 88.52% | 19.984<br>66 | 148 | 87.41% | 17.11<br>587 | Utp14a      |
| 235132                           | 8882 | 173 | 49.48% | 5.4697<br>95 | 124 | 42.31% | 3.924<br>94  | Zbtb44      |
| 12261                            | 1177 | 173 | 93.80% | 41.276<br>74 | 180 | 90.57% | 42.99<br>502 | C1qbp       |
| gi 165972316 ref N<br>M_025967.3 | 5938 | 173 | 61.92% | 8.1816<br>64 | 202 | 64.52% | 9.563<br>862 | -           |
| 66884                            | 2407 | 173 | 89.07% | 20.183<br>93 | 145 | 77.15% | 16.93<br>612 | Appbp2      |
| 233724                           | 3619 | 173 | 57.70% | 13.424<br>35 | 173 | 57.23% | 13.43<br>939 | Tmem41<br>b |
| 77446                            | 4804 | 172 | 70.84% | 10.054<br>52 | 65  | 39.13% | 3.803<br>93  | Heg1        |
| gi 29293830 ref N<br>M_172416.2  | 3001 | 172 | 87.47% | 16.095<br>27 | 158 | 82.87% | 14.80<br>175 | -           |
| 93692                            | 1335 | 172 | 87.12% | 36.181<br>19 | 244 | 90.86% | 51.38<br>433 | Glrx        |
| 67843                            | 2861 | 172 | 70.08% | 16.882<br>87 | 181 | 64.91% | 17.78<br>619 | Slc35a4     |
| 19663                            | 2547 | 172 | 57.71% | 18.964<br>23 | 226 | 58.74% | 24.94<br>604 | Rbpms       |
| 20910                            | 4005 | 172 | 75.03% | 12.060<br>4  | 156 | 73.66% | 10.95<br>076 | Stxbp1      |
| 12398                            | 7678 | 172 | 51.29% | 6.2909<br>47 | 75  | 30.76% | 2.746<br>22  | Cbfa2t3     |
| 12418                            | 5213 | 172 | 55.28% | 9.2656<br>62 | 154 | 50.39% | 8.305<br>296 | Cbx4        |
| gi 83816979 ref N<br>M_133734.2  | 2512 | 172 | 89.89% | 19.228<br>46 | 158 | 86.11% | 17.68<br>315 | -           |
| gi 133891701 ref N<br>M_028778.3 | 3095 | 172 | 79.19% | 15.606<br>43 | 137 | 75.15% | 12.44<br>463 | -           |
| 66397                            | 1253 | 172 | 86.27% | 38.549       | 183 | 87.23% | 41.06<br>03  | Sar1b       |
| 192157                           | 7015 | 172 | 58.12% | 6.8855<br>16 | 173 | 47.73% | 6.933<br>309 | Socs7       |
| 58875                            | 1748 | 172 | 87.64% | 27.632<br>66 | 187 | 86.61% | 30.07<br>615 | Hibadh      |
| 98258                            | 4596 | 172 | 51.91% | 10.509<br>55 | 158 | 50.63% | 9.664<br>94  | Txndc9      |
| 12151                            | 3594 | 171 | 70.98% | 13.361<br>45 | 106 | 61.32% | 8.291<br>821 | Bmi1        |
| gi 114326481 ref N<br>M_009283.3 | 5217 | 171 | 63.06% | 9.2047<br>29 | 143 | 63.02% | 7.706<br>148 | -           |

|        |      |     |        |              |     |        |              |             |
|--------|------|-----|--------|--------------|-----|--------|--------------|-------------|
| 56709  | 1789 | 171 | 90.94% | 26.842<br>41 | 126 | 83.12% | 19.80<br>078 | Dnajb12     |
| 52521  | 2804 | 171 | 60.13% | 17.125<br>92 | 165 | 56.35% | 16.54<br>353 | Zfp622      |
| 69192  | 3405 | 171 | 78.88% | 14.103<br>1  | 154 | 76.27% | 12.71<br>527 | Dhx16       |
| 14999  | 1285 | 171 | 78.44% | 37.370<br>48 | 140 | 77.43% | 30.63        | H2-DMb<br>1 |
| 16880  | 9663 | 171 | 49.07% | 4.9695<br>82 | 244 | 56.57% | 7.099<br>046 | Lifr        |
| 230514 | 1827 | 171 | 92.06% | 26.284<br>11 | 168 | 92.34% | 25.85<br>192 | Leprot      |
| 107769 | 2202 | 171 | 55.18% | 21.807<br>93 | 180 | 58.72% | 22.98<br>144 | Tm6sf1      |
| 70178  | 2252 | 171 | 84.77% | 21.323<br>74 | 96  | 71.63% | 11.98<br>464 | Fam108c     |
| 234875 | 3049 | 171 | 88.13% | 15.749<br>78 | 112 | 70.74% | 10.32<br>72  | Ttc13       |
| 214498 | 2692 | 171 | 84.88% | 17.838<br>44 | 136 | 75.11% | 14.20<br>319 | Cdc73       |
| 76867  | 3711 | 171 | 79.22% | 12.940<br>2  | 132 | 67.69% | 10.00<br>012 | Rhbdd1      |
| 230935 | 2944 | 171 | 84.07% | 16.311<br>5  | 158 | 84.75% | 15.08<br>834 | Dnajc11     |
| 70785  | 2539 | 171 | 78.93% | 18.913<br>38 | 140 | 78.26% | 15.50<br>199 | Dennd1c     |
| 66964  | 2796 | 171 | 85.09% | 17.174<br>92 | 163 | 87.70% | 16.38<br>976 | Golt1b      |
| 68262  | 1910 | 171 | 95.86% | 25.141<br>92 | 158 | 89.58% | 23.25<br>658 | Agpat4      |
| 66848  | 3954 | 171 | 56.93% | 12.144<br>93 | 152 | 54.55% | 10.80<br>759 | Fuca2       |
| 259279 | 3663 | 171 | 81.63% | 13.109<br>76 | 134 | 73.74% | 10.28<br>466 | Tubgcp3     |
| 217364 | 3922 | 171 | 80.70% | 12.244<br>03 | 63  | 50.31% | 4.516<br>012 | Engase      |
| 12399  | 3891 | 171 | 75.94% | 12.341<br>58 | 123 | 66.98% | 8.887<br>221 | Runx3       |
| 100952 | 3466 | 171 | 85.60% | 13.854<br>9  | 215 | 89.79% | 17.43<br>942 | Emilin1     |
| 11555  | 2173 | 170 | 88.63% | 21.969<br>74 | 211 | 92.27% | 27.29<br>888 | Adrb2       |
| 56489  | 3203 | 170 | 79.80% | 14.904<br>85 | 186 | 83.48% | 16.32<br>594 | Ikbke       |

|                                  |      |     |        |              |     |        |              |         |
|----------------------------------|------|-----|--------|--------------|-----|--------|--------------|---------|
| 54721                            | 4822 | 170 | 70.10% | 9.9005<br>07 | 113 | 56.49% | 6.588<br>3   | Tyk2    |
| gi 149249398 ref X<br>R_031636.1 | 3945 | 170 | 25.27% | 12.101<br>46 | 209 | 24.23% | 14.89<br>434 | -       |
| 12793                            | 1484 | 170 | 86.52% | 32.169<br>98 | 169 | 88.75% | 32.01<br>658 | Cnih    |
| 28035                            | 2237 | 170 | 80.29% | 21.341<br>19 | 122 | 71.66% | 15.33<br>261 | Usp39   |
| 76719                            | 5510 | 170 | 37.21% | 8.6642<br>91 | 82  | 32.67% | 4.183<br>93  | Kans11  |
| 223499                           | 1543 | 170 | 89.37% | 30.939<br>89 | 157 | 95.01% | 28.60<br>592 | Dcaf13  |
| 320717                           | 4611 | 170 | 74.80% | 10.353<br>56 | 112 | 64.17% | 6.828<br>81  | Pptc7   |
| 27096                            | 1315 | 170 | 91.25% | 36.304<br>37 | 178 | 87.22% | 38.05<br>541 | Trappe3 |
| 58184                            | 3285 | 170 | 76.26% | 14.532<br>8  | 147 | 72.09% | 12.58<br>068 | Rqcd1   |
| 18130                            | 5019 | 170 | 53.06% | 9.5119<br>03 | 192 | 55.85% | 10.75<br>489 | Ints6   |
| gi 149245348 ref X<br>M_980696.2 | 3693 | 170 | 32.55% | 12.927<br>23 | 208 | 33.25% | 15.83<br>457 | -       |
| 69035                            | 6987 | 169 | 48.22% | 6.7925<br>32 | 125 | 40.25% | 5.029<br>692 | Zdhhc3  |
| 66840                            | 2344 | 169 | 90.19% | 20.247<br>19 | 185 | 83.02% | 22.18<br>892 | Wdr451  |
| 22129                            | 7295 | 169 | 62.73% | 6.5057<br>46 | 124 | 45.29% | 4.778<br>796 | Ttc3    |
| 227624                           | 3173 | 169 | 88.06% | 14.957<br>27 | 163 | 87.17% | 14.44<br>241 | Rab16   |
| 12567                            | 1365 | 169 | 55.60% | 34.768<br>8  | 110 | 52.89% | 22.65<br>594 | Cdk4    |
| 18572                            | 6062 | 169 | 59.65% | 7.8290<br>03 | 117 | 46.67% | 5.426<br>153 | Pdcd11  |
| 70650                            | 4286 | 169 | 59.12% | 11.073<br>13 | 133 | 54.67% | 8.724<br>119 | Zcchc8  |
| 67469                            | 3148 | 169 | 74.08% | 15.076<br>05 | 147 | 75.67% | 13.12<br>819 | Abhd5   |
| 27406                            | 3288 | 169 | 75.52% | 14.434<br>13 | 113 | 61.80% | 9.662<br>038 | Abcf3   |
| 68193                            | 686  | 169 | 14.14% | 69.182<br>83 | 155 | 14.14% | 63.52<br>281 | Rpl24   |
| 22222                            | 7765 | 169 | 60.03% | 6.1119<br>66 | 89  | 37.12% | 3.222<br>335 | Ubr1    |



|                                 |      |     |        |              |     |        |              |         |
|---------------------------------|------|-----|--------|--------------|-----|--------|--------------|---------|
| 216001                          | 2275 | 169 | 95.34% | 20.861<br>28 | 159 | 90.68% | 19.64<br>888 | Micu1   |
| 75624                           | 2549 | 169 | 88.15% | 18.618<br>84 | 156 | 89.76% | 17.20<br>588 | Metap1  |
| 67041                           | 3496 | 169 | 78.52% | 13.575<br>35 | 175 | 78.78% | 14.07<br>307 | Oxct1   |
| 67889                           | 2563 | 169 | 79.32% | 18.517<br>14 | 160 | 79.63% | 17.55<br>066 | Rbm18   |
| 268706                          | 8913 | 169 | 51.91% | 5.3247<br>41 | 81  | 30.89% | 2.554<br>955 | Slc38a9 |
| 217737                          | 1330 | 169 | 92.71% | 35.683<br>77 | 136 | 95.94% | 28.74<br>812 | Ahsa1   |
| 19054                           | 4522 | 168 | 60.61% | 10.433<br>13 | 158 | 57.67% | 9.823<br>102 | Ppp2r3d |
| 12181                           | 2476 | 168 | 89.66% | 19.054<br>36 | 160 | 85.06% | 18.16<br>734 | Bop1    |
| 240028                          | 5181 | 168 | 72.82% | 9.1060<br>79 | 90  | 53.87% | 4.883<br>723 | Lnpep   |
| 19352                           | 1574 | 168 | 88.31% | 29.973<br>69 | 148 | 83.80% | 26.43<br>499 | Rabggtb |
| 13017                           | 4170 | 168 | 53.19% | 11.313<br>81 | 201 | 53.81% | 13.55<br>134 | Ctbp2   |
| 11777                           | 1479 | 168 | 46.99% | 31.898<br>98 | 159 | 39.15% | 30.22<br>394 | Ap3s1   |
| 56317                           | 2751 | 168 | 76.55% | 17.149<br>62 | 202 | 75.32% | 20.64<br>348 | Anapc7  |
| 19344                           | 3180 | 168 | 53.30% | 14.836<br>04 | 117 | 49.03% | 10.34<br>382 | Rab5b   |
| 19217                           | 3768 | 168 | 64.25% | 12.520<br>86 | 116 | 56.87% | 8.655<br>043 | Ptger2  |
| 235559                          | 5112 | 168 | 72.63% | 9.2289<br>89 | 82  | 48.92% | 4.509<br>674 | Topbp1  |
| 240880                          | 4069 | 168 | 73.29% | 11.594<br>64 | 170 | 67.63% | 11.74<br>582 | Scyl3   |
| gi 88853577 ref N<br>M_007454.2 | 3942 | 168 | 77.70% | 11.968<br>19 | 92  | 62.28% | 6.561<br>352 | -       |
| 226144                          | 3349 | 168 | 79.96% | 14.087<br>37 | 138 | 78.05% | 11.58<br>473 | Erlin1  |
| 68339                           | 6292 | 168 | 57.04% | 7.4981<br>87 | 93  | 42.99% | 4.155<br>434 | Ccdc88c |
| 278279                          | 5701 | 167 | 73.04% | 8.2262<br>36 | 121 | 57.43% | 5.967<br>006 | Tmtc2   |
| 319651                          | 7196 | 167 | 63.79% | 6.5172       | 134 | 52.49% | 5.235<br>23  | Usp37   |

|                                 |      |     |        |              |     |        |              |                  |
|---------------------------------|------|-----|--------|--------------|-----|--------|--------------|------------------|
| 20333                           | 1815 | 167 | 89.92% | 25.838<br>99 | 167 | 95.59% | 25.86<br>795 | Sec22b           |
| 66413                           | 1313 | 167 | 94.06% | 35.718<br>03 | 141 | 94.29% | 30.19<br>093 | Psm6             |
| 270084                          | 2800 | 167 | 73.61% | 16.749<br>2  | 226 | 71.54% | 22.69<br>199 | Lpcat2           |
| 21770                           | 2926 | 167 | 84.18% | 16.027<br>95 | 147 | 84.76% | 14.12<br>424 | Ppp2r5d          |
| 15502                           | 5632 | 167 | 23.76% | 8.3270<br>19 | 205 | 23.38% | 10.23<br>324 | Dnaja1           |
| 15115                           | 1999 | 167 | 90.95% | 23.460<br>61 | 157 | 88.94% | 22.08<br>05  | Hars             |
| 66824                           | 2135 | 167 | 62.62% | 21.966<br>17 | 217 | 63.56% | 28.57<br>485 | Pycard           |
| 67922                           | 1921 | 167 | 89.80% | 24.413<br>21 | 153 | 88.50% | 22.39<br>165 | Fam32a           |
| 329260                          | 8206 | 167 | 59.61% | 5.7150<br>58 | 119 | 42.51% | 4.076<br>97  | Dennd1b          |
| 228033                          | 679  | 167 | 95.58% | 69.068<br>88 | 178 | 99.12% | 73.70<br>082 | Atp5g3           |
| 58996                           | 5450 | 167 | 62.95% | 8.6050<br>95 | 218 | 61.23% | 11.24<br>559 | Arhgap2<br>3     |
| 20018                           | 913  | 167 | 26.51% | 51.366<br>67 | 166 | 28.59% | 51.11<br>63  | Polr1d           |
| 67266                           | 2724 | 167 | 84.36% | 17.216<br>51 | 172 | 78.52% | 17.75<br>184 | Fam69a           |
| 234776                          | 4900 | 167 | 74.37% | 9.5709<br>73 | 103 | 59.20% | 5.909<br>67  | Atmin            |
| 68066                           | 1678 | 167 | 85.64% | 27.948<br>61 | 143 | 86.53% | 23.95<br>886 | Slc25a39         |
| gi 33468884 ref N<br>M_009786.1 | 1493 | 167 | 94.17% | 31.411<br>77 | 155 | 90.42% | 29.18<br>731 | -                |
| 66055                           | 1133 | 167 | 67.43% | 41.392<br>56 | 149 | 70.96% | 36.97<br>247 | 061009<br>D07Rik |
| 54394                           | 2365 | 167 | 89.51% | 19.829<br>92 | 138 | 90.70% | 16.40<br>477 | Crlf3            |
| 53374                           | 6129 | 167 | 62.95% | 7.6517<br>81 | 66  | 34.80% | 3.027<br>446 | Chst3            |
| 22151                           | 1638 | 166 | 56.65% | 28.459<br>67 | 139 | 59.89% | 23.85<br>739 | Tubb2a           |
| 66314                           | 2336 | 166 | 86.04% | 19.955<br>88 | 121 | 77.83% | 14.56<br>246 | Tpd52l2          |
| 74127                           | 1774 | 166 | 88.28% | 26.277<br>87 | 174 | 88.56% | 27.57<br>514 | Krt80            |

|                              |      |     |        |              |     |        |              |              |
|------------------------------|------|-----|--------|--------------|-----|--------|--------------|--------------|
| 11544                        | 1583 | 166 | 90.52% | 29.448<br>48 | 183 | 95.77% | 32.50<br>067 | Adprh        |
| 21354                        | 2950 | 166 | 82.47% | 15.802<br>35 | 133 | 76.71% | 12.67<br>511 | Tap1         |
| 14886                        | 4455 | 166 | 63.05% | 10.463<br>96 | 130 | 51.87% | 8.203<br>851 | Gtf2i        |
| 22184                        | 3953 | 166 | 48.92% | 11.792<br>8  | 165 | 39.79% | 11.73<br>49  | Zrsr2        |
| 11666                        | 3421 | 166 | 75.91% | 13.626<br>7  | 130 | 77%    | 10.68<br>347 | Abcd1        |
| 99003                        | 8973 | 166 | 56.50% | 5.1952<br>46 | 117 | 40.95% | 3.665<br>813 | Qser1        |
| 74570                        | 8261 | 166 | 54.05% | 5.6430<br>15 | 135 | 50.82% | 4.594<br>341 | Zkscan1      |
| 75710                        | 3752 | 165 | 81.61% | 12.349<br>71 | 150 | 77.40% | 11.23<br>959 | Rbm12        |
| 94185                        | 3626 | 165 | 78.46% | 12.778<br>85 | 143 | 67.79% | 11.08<br>742 | Tnfrsf21     |
| 20111                        | 3153 | 165 | 82.08% | 14.695<br>88 | 134 | 77.23% | 11.94<br>821 | Rps6ka1      |
| 67495                        | 2864 | 165 | 87.36% | 16.178<br>81 | 160 | 88.30% | 15.70<br>613 | Tmem16<br>7b |
| 26445                        | 861  | 165 | 89.78% | 53.816<br>63 | 233 | 92.10% | 76.08<br>077 | Psmb2        |
| 72828                        | 3243 | 165 | 45.64% | 14.288<br>04 | 182 | 45.05% | 15.77<br>78  | Ubash3b      |
| 69146                        | 1776 | 165 | 92.91% | 26.090<br>16 | 184 | 96.23% | 29.12<br>708 | Gsdmd        |
| 116733                       | 2089 | 165 | 93.97% | 22.181       | 153 | 93.97% | 20.59<br>089 | Vps4a        |
| 229898                       | 3021 | 165 | 84.48% | 15.338<br>01 | 254 | 88.18% | 23.63<br>769 | Gbp5         |
| gi 141803036 ref NM_026417.3 | 2112 | 165 | 74.01% | 21.939<br>45 | 147 | 76.56% | 19.56<br>796 | -            |
| 116891                       | 3623 | 165 | 70.36% | 12.789<br>43 | 137 | 60.81% | 10.63<br>101 | Derl2        |
| 74133                        | 3236 | 165 | 77.87% | 14.318<br>95 | 147 | 77.60% | 12.77<br>118 | Smg8         |
| 12609                        | 2260 | 164 | 60.88% | 20.378<br>45 | 168 | 63.27% | 20.89<br>888 | Cebpd        |
| 12515                        | 1620 | 164 | 94.26% | 28.429<br>19 | 206 | 89.88% | 35.74<br>986 | Cd69         |
| 66375                        | 1318 | 164 | 84.83% | 34.943<br>32 | 228 | 93.55% | 48.63<br>418 | Dhrs7        |

|                                 |       |     |        |              |     |        |              |                   |
|---------------------------------|-------|-----|--------|--------------|-----|--------|--------------|-------------------|
| 229363                          | 4567  | 164 | 47.43% | 10.084<br>36 | 94  | 40.11% | 5.786<br>54  | Gmps              |
| 434484                          | 2417  | 164 | 48.28% | 19.054<br>73 | 157 | 48.82% | 18.26<br>186 | Sp140             |
| 235380                          | 10614 | 164 | 47.55% | 4.3391<br>08 | 102 | 31.32% | 2.701<br>738 | Dmx12             |
| 80889                           | 3847  | 164 | 63.37% | 11.971<br>74 | 144 | 58.75% | 10.52<br>355 | Mesdc1            |
| 19395                           | 2209  | 164 | 86.60% | 20.848<br>93 | 113 | 80.72% | 14.38<br>152 | Rasgrp2           |
| 270156                          | 3362  | 164 | 75.16% | 13.698<br>78 | 141 | 74.12% | 11.79<br>081 | AU0198<br>23      |
| 26446                           | 731   | 164 | 98.91% | 63.003<br>14 | 159 | 99.04% | 61.15<br>076 | Psmb3             |
| 94044                           | 6933  | 164 | 53.89% | 6.6429<br>1  | 150 | 52.57% | 6.082<br>641 | Bcl2l13           |
| gi 54633299 ref N<br>M_177592.3 | 5167  | 164 | 71.72% | 8.9133<br>53 | 144 | 66.92% | 7.835<br>129 | -                 |
| 23924                           | 1775  | 164 | 91.32% | 25.946<br>64 | 181 | 90.59% | 28.66<br>833 | Katna1            |
| 22644                           | 3264  | 164 | 81.04% | 14.110<br>08 | 163 | 76.13% | 14.03<br>976 | Rnf103            |
| 18046                           | 1959  | 163 | 93.26% | 23.366<br>24 | 142 | 84.12% | 20.37<br>868 | Nfyc              |
| 382252                          | 3366  | 163 | 75.79% | 13.599<br>07 | 96  | 57.22% | 8.018<br>243 | A830080<br>D01Rik |
| 272589                          | 4967  | 163 | 69.24% | 9.2157<br>18 | 133 | 56.90% | 7.528        | Tbcel             |
| 101540                          | 3625  | 163 | 83.70% | 12.627<br>44 | 96  | 58.23% | 7.445<br>354 | Prkd2             |
| 18759                           | 4465  | 163 | 73.84% | 10.251<br>84 | 98  | 58.52% | 6.170<br>591 | Prkci             |
| 27373                           | 2760  | 163 | 82.10% | 16.584<br>95 | 184 | 80.65% | 18.74<br>264 | Csnk1e            |
| 74105                           | 4891  | 163 | 61.95% | 9.3589<br>18 | 100 | 41.87% | 5.748<br>102 | Gga2              |
| 18201                           | 3518  | 163 | 79.25% | 13.011<br>5  | 110 | 63.87% | 8.790<br>609 | Nsmaf             |
| 20184                           | 2931  | 163 | 71.07% | 15.617<br>36 | 120 | 61.92% | 11.51<br>032 | Uimc1             |
| 216395                          | 1393  | 163 | 88.01% | 32.860<br>35 | 128 | 86.86% | 25.83<br>336 | Tmem5             |
| 52392                           | 2738  | 163 | 85.87% | 16.718<br>21 | 121 | 76.55% | 12.42<br>436 | D1Ert6<br>22e     |

|                                     |      |     |        |              |     |        |              |                   |
|-------------------------------------|------|-----|--------|--------------|-----|--------|--------------|-------------------|
| 14105                               | 3415 | 163 | 49.34% | 13.403<br>94 | 154 | 49.25% | 12.67<br>804 | Srsf10            |
| 56736                               | 3369 | 163 | 77.09% | 13.586<br>96 | 131 | 65.69% | 10.93<br>182 | Rnf14             |
| 230866                              | 6226 | 163 | 67.91% | 7.3521<br>47 | 138 | 60.62% | 6.231<br>493 | Emc1              |
| 110173                              | 3688 | 163 | 79.09% | 12.411<br>73 | 162 | 79.34% | 12.34<br>941 | Manba             |
| 268749                              | 3443 | 163 | 84.35% | 13.294<br>94 | 128 | 70.61% | 10.45<br>19  | Rnf31             |
| 16197                               | 3227 | 163 | 80.94% | 14.184<br>84 | 61  | 53.08% | 5.314<br>385 | Il7r              |
| 68510                               | 7133 | 163 | 65.43% | 6.4172<br>81 | 82  | 39.03% | 3.231<br>943 | Ints1             |
| 67683                               | 2619 | 163 | 36.62% | 17.477<br>84 | 189 | 40.28% | 20.28<br>843 | 2610029<br>G23Rik |
| gi 149262083 ref X<br>M_001475830.1 | 5349 | 163 | 49.28% | 8.5575<br>75 | 157 | 48.27% | 8.251<br>809 | -                 |
| 71844                               | 2410 | 163 | 84.40% | 18.993<br>56 | 106 | 84.11% | 12.36<br>548 | Nupl1             |
| gi 51317396 ref N<br>M_133788.1     | 4796 | 162 | 69.47% | 9.4857<br>47 | 84  | 47.08% | 4.924<br>047 | -                 |
| 75764                               | 3692 | 162 | 40.71% | 12.322<br>22 | 275 | 21.48% | 20.94<br>079 | Slx1b             |
| 78287                               | 5242 | 162 | 68.43% | 8.6786<br>81 | 115 | 60.87% | 6.167<br>696 | Zfyve20           |
| 66154                               | 969  | 162 | 88.03% | 46.949<br>06 | 161 | 89.78% | 46.71<br>154 | Tmem14<br>c       |
| 67299                               | 7043 | 162 | 58.54% | 6.4594<br>13 | 159 | 53.59% | 6.346<br>899 | Dock7             |
| gi 118130593 ref N<br>M_019830.2    | 1272 | 162 | 86.40% | 35.765<br>44 | 116 | 80.90% | 25.63<br>852 | -                 |
| 17082                               | 5080 | 162 | 67.70% | 8.9554<br>42 | 34  | 25.39% | 1.881<br>643 | Il1rl1            |
| 13614                               | 2344 | 162 | 77.13% | 19.408<br>55 | 255 | 85.03% | 30.58<br>473 | Edn1              |
| 26562                               | 3701 | 162 | 81.03% | 12.292<br>26 | 123 | 72.52% | 9.343<br>469 | Ncdn              |
| 84505                               | 4682 | 162 | 72.38% | 9.7167<br>12 | 89  | 47.37% | 5.344<br>176 | Setdb1            |
| 68015                               | 2297 | 162 | 93.25% | 19.805<br>68 | 137 | 88.38% | 16.76<br>802 | Trap1             |
| 106512                              | 1359 | 162 | 83.30% | 33.475<br>82 | 145 | 88.82% | 29.99<br>651 | Gpsm3             |

|        |      |     |        |              |     |        |              |                   |
|--------|------|-----|--------|--------------|-----|--------|--------------|-------------------|
| 72141  | 2499 | 162 | 86.51% | 18.204<br>74 | 129 | 80.39% | 14.51<br>261 | Adpgk             |
| 79233  | 4144 | 162 | 76.76% | 10.978<br>2  | 114 | 70.68% | 7.734<br>054 | Zfp319            |
| 104082 | 7109 | 162 | 56.38% | 6.3994<br>44 | 109 | 41.51% | 4.310<br>624 | Wdr7              |
| 12237  | 2055 | 162 | 80.49% | 22.138<br>03 | 136 | 78.30% | 18.60<br>584 | Bub3              |
| 68031  | 4420 | 162 | 34.73% | 10.292<br>68 | 153 | 33.05% | 9.731<br>758 | Rnf146            |
| 66508  | 1201 | 162 | 77.02% | 37.879<br>8  | 130 | 72.86% | 30.43<br>144 | Lamtor1           |
| 67759  | 843  | 162 | 98.34% | 53.966<br>36 | 132 | 96.68% | 44.02<br>187 | 5033414<br>D02Rik |
| 16337  | 9357 | 162 | 49.65% | 4.8619<br>9  | 177 | 50.92% | 5.318<br>128 | Insr              |
| 19222  | 3334 | 162 | 83.20% | 13.645<br>36 | 97  | 52.70% | 8.179<br>528 | Ptgir             |
| 67180  | 2329 | 162 | 83.77% | 19.533<br>55 | 128 | 72.91% | 15.45<br>121 | Yipf5             |
| 68949  | 754  | 161 | 62.73% | 59.963<br>95 | 184 | 59.15% | 68.60<br>703 | 1500012<br>F01Rik |
| 22272  | 511  | 161 | 92.76% | 88.479<br>1  | 161 | 85.52% | 88.57<br>825 | Uqcrq             |
| 270096 | 5054 | 161 | 68.08% | 8.9459<br>48 | 105 | 56.85% | 5.840<br>852 | Mon1b             |
| 232791 | 2923 | 161 | 67.67% | 15.467<br>95 | 90  | 60.45% | 8.656<br>37  | Cnot3             |
| 27984  | 2381 | 161 | 25.91% | 18.989       | 216 | 30.28% | 25.50<br>448 | Efh2              |
| 108083 | 5068 | 161 | 77.01% | 8.9212<br>35 | 104 | 58.11% | 5.769<br>243 | Pip4k2b           |
| 69104  | 4113 | 161 | 43.74% | 10.992<br>66 | 175 | 38.49% | 11.96<br>194 | 5-Mar             |
| 109181 | 6448 | 161 | 60.41% | 7.0119<br>14 | 112 | 50.78% | 4.883<br>319 | Trip11            |
| 72823  | 8409 | 161 | 54.86% | 5.3767<br>18 | 200 | 56.02% | 6.686<br>637 | Pard3b            |
| 101023 | 2290 | 161 | 78.86% | 19.743<br>59 | 127 | 73.45% | 15.59<br>159 | Zfp513            |
| 28169  | 3439 | 161 | 80.87% | 13.147<br>08 | 117 | 75.25% | 9.564<br>798 | Agpat3            |
| 56371  | 2258 | 161 | 85.74% | 20.023<br>39 | 158 | 83.84% | 19.67<br>231 | Fzr1              |

|                                    |       |     |        |              |     |        |              |         |
|------------------------------------|-------|-----|--------|--------------|-----|--------|--------------|---------|
| gi 90991703 ref N<br>M_001033439.2 | 4707  | 161 | 71.72% | 9.6054<br>43 | 98  | 59.70% | 5.853<br>343 | -       |
| 74213                              | 4105  | 161 | 73.08% | 11.014<br>09 | 138 | 64.82% | 9.451<br>224 | Rbm26   |
| 98403                              | 3650  | 161 | 83.86% | 12.387<br>07 | 185 | 79.62% | 14.24<br>954 | Zfp451  |
| 100198                             | 4739  | 161 | 72.27% | 9.5405<br>82 | 90  | 55.92% | 5.339<br>221 | H6pd    |
| 52668                              | 1053  | 160 | 94.30% | 42.670<br>46 | 231 | 96.11% | 61.67<br>451 | Ifi2711 |
| 72046                              | 5531  | 160 | 55.99% | 8.1236<br>66 | 171 | 59.01% | 8.691<br>897 | Urgcp   |
| 66142                              | 1176  | 160 | 39.63% | 38.207<br>48 | 214 | 43.79% | 51.15<br>977 | Cox7b   |
| 27418                              | 3973  | 160 | 71.26% | 11.309<br>34 | 126 | 53.94% | 8.916<br>083 | Mkn1    |
| 217715                             | 1573  | 160 | 77.24% | 28.564<br>52 | 147 | 84.93% | 26.27<br>306 | Eif2b2  |
| 75786                              | 6584  | 160 | 63.84% | 6.8244<br>22 | 97  | 40.22% | 4.141<br>942 | Ckap5   |
| 73699                              | 3636  | 160 | 53.22% | 12.357<br>53 | 145 | 43.78% | 11.21<br>157 | Ppp2r1b |
| 268903                             | 4529  | 160 | 76%    | 9.9209<br>53 | 150 | 71.87% | 9.311<br>316 | Nrip1   |
| 210146                             | 6159  | 160 | 62.61% | 7.2953<br>39 | 135 | 49.36% | 6.162<br>34  | Irgq    |
| gi 148747478 ref N<br>M_008514.3   | 5440  | 160 | 65.48% | 8.2595<br>58 | 73  | 40.22% | 3.772<br>646 | -       |
| 20339                              | 2912  | 160 | 91.72% | 15.429<br>94 | 242 | 92.93% | 23.36<br>394 | Sele    |
| 69190                              | 2471  | 160 | 89.64% | 18.183<br>73 | 168 | 87.54% | 19.11<br>431 | Dym     |
| 319565                             | 21718 | 160 | 23.45% | 2.0688<br>83 | 146 | 18.83% | 1.889<br>971 | Syne2   |
| 17772                              | 3488  | 160 | 72.25% | 12.881<br>88 | 110 | 69.58% | 8.866<br>216 | Mtm1    |
| 66052                              | 1179  | 160 | 95.34% | 38.110<br>26 | 165 | 91.77% | 39.34<br>525 | Sdhc    |
| 11983                              | 552   | 160 | 85.69% | 81.398<br>54 | 250 | 87.14% | 127.3<br>277 | Atpif1  |
| 14904                              | 3444  | 160 | 81.77% | 13.046<br>46 | 129 | 74.83% | 10.53<br>049 | Gtpbp1  |
| 67568                              | 1630  | 160 | 58.47% | 27.565<br>64 | 154 | 54.36% | 26.56<br>166 | Mrfap1  |

|                                 |       |     |        |              |     |        |              |                   |
|---------------------------------|-------|-----|--------|--------------|-----|--------|--------------|-------------------|
| 100986                          | 12105 | 160 | 42.35% | 3.7118<br>54 | 105 | 25.97% | 2.438<br>634 | Akap9             |
| 329877                          | 5648  | 160 | 66.24% | 7.9553<br>81 | 72  | 40.33% | 3.583<br>933 | Dennd4c           |
| 20715                           | 2030  | 160 | 83.84% | 22.133<br>99 | 101 | 76.06% | 13.98<br>774 | Serpina3<br>g     |
| 360013                          | 7304  | 160 | 52.09% | 6.1516<br>97 | 123 | 43.95% | 4.734<br>417 | Myo18a            |
| 268490                          | 1224  | 159 | 89.22% | 36.479<br>71 | 119 | 93.22% | 27.33<br>302 | Lsm12             |
| 228960                          | 3768  | 159 | 70.89% | 11.850<br>1  | 91  | 61.09% | 6.789<br>732 | Stx16             |
| 240442                          | 4188  | 159 | 78.44% | 10.661<br>69 | 130 | 71.51% | 8.726<br>876 | Adnp2             |
| 75805                           | 3780  | 159 | 72.99% | 11.812<br>48 | 105 | 64.31% | 7.809<br>435 | Nln               |
| 17289                           | 3564  | 159 | 79.15% | 12.528<br>39 | 161 | 75.42% | 12.70<br>019 | Mertk             |
| 12908                           | 4393  | 159 | 63.49% | 10.164<br>16 | 126 | 52.56% | 8.063<br>646 | Crat              |
| 54128                           | 1802  | 159 | 94.78% | 24.778<br>67 | 164 | 97.95% | 25.58<br>652 | Pmm2              |
| 234797                          | 5565  | 159 | 66.68% | 8.0235<br>7  | 110 | 54.20% | 5.557<br>118 | 6430548<br>M08Rik |
| 27176                           | 864   | 159 | 11%    | 51.679<br>59 | 175 | 11%    | 56.94<br>38  | Rpl7a             |
| 627695                          | 1470  | 159 | 90.61% | 30.374<br>94 | 134 | 93.27% | 25.62<br>77  | Gm6780            |
| 269252                          | 7127  | 159 | 56.69% | 6.2650<br>72 | 92  | 38.47% | 3.629<br>136 | Gtf3c4            |
| 100169                          | 4585  | 159 | 77.08% | 9.7385<br>32 | 117 | 64.49% | 7.174<br>12  | Phactr4           |
| 22225                           | 3176  | 159 | 85.48% | 14.058<br>93 | 123 | 79.41% | 10.88<br>797 | Usp5              |
| gi 22208994 ref N<br>M_024242.2 | 2435  | 159 | 90.80% | 18.337<br>24 | 129 | 82.55% | 14.89<br>405 | -                 |
| 69745                           | 933   | 159 | 95.07% | 47.857<br>63 | 165 | 88.96% | 49.71<br>923 | Pold4             |
| 224454                          | 3115  | 159 | 68.92% | 14.334<br>24 | 80  | 56.37% | 7.220<br>28  | Zdhc14            |
| 67456                           | 3935  | 159 | 60.81% | 11.347<br>18 | 137 | 56.49% | 9.788<br>09  | Ergic2            |
| 66171                           | 883   | 159 | 91.96% | 50.567<br>58 | 130 | 94.56% | 41.39<br>089 | Pgls              |



|        |      |     |        |              |     |        |              |              |
|--------|------|-----|--------|--------------|-----|--------|--------------|--------------|
| 232023 | 2906 | 159 | 85.10% | 15.365<br>16 | 160 | 81.90% | 15.47<br>913 | Vopp1        |
| 321000 | 3370 | 158 | 80.74% | 13.166<br>27 | 122 | 63.56% | 10.17<br>776 | Lrif1        |
| 11909  | 4294 | 158 | 48.51% | 10.333<br>1  | 147 | 50.68% | 9.624<br>483 | Atf2         |
| 18507  | 1208 | 158 | 98.92% | 36.730<br>42 | 91  | 92.88% | 21.17<br>857 | Pax5         |
| 56697  | 3848 | 158 | 74.40% | 11.530<br>75 | 75  | 51.69% | 5.479<br>593 | Akap10       |
| 68891  | 2733 | 158 | 84.85% | 16.235<br>03 | 87  | 70.22% | 8.949<br>561 | Cd177        |
| 211922 | 4444 | 158 | 70.12% | 9.9843<br>26 | 86  | 54.07% | 5.440<br>597 | Fam116a      |
| 21767  | 1757 | 158 | 82.64% | 25.253<br>47 | 159 | 81.27% | 25.44<br>178 | Tex264       |
| 207740 | 1402 | 158 | 94.22% | 31.647<br>89 | 163 | 92.30% | 32.68<br>599 | Fam100a      |
| 27973  | 764  | 158 | 84.95% | 58.076<br>37 | 210 | 85.99% | 77.27<br>661 | Vkorc1       |
| 80886  | 2442 | 158 | 81.98% | 18.169<br>67 | 128 | 73.91% | 14.73<br>623 | Senp3        |
| 69202  | 1155 | 158 | 92.55% | 38.415<br>88 | 124 | 80.78% | 30.18<br>296 | Ptms         |
| 100637 | 1907 | 158 | 95.33% | 23.267<br>09 | 99  | 88.20% | 14.59<br>508 | N4bp211      |
| 102098 | 5300 | 158 | 68.79% | 8.3717<br>63 | 59  | 38.36% | 3.129<br>668 | Arhgef1<br>8 |
| 64050  | 1418 | 157 | 86.81% | 31.092<br>75 | 137 | 92.38% | 27.16<br>229 | Yeats4       |
| 102103 | 6554 | 157 | 50.03% | 6.7271<br>16 | 125 | 40.81% | 5.361<br>986 | Mtus1        |
| 71777  | 3755 | 157 | 60.85% | 11.741<br>55 | 150 | 65.27% | 11.23<br>061 | Ing3         |
| 193742 | 1945 | 157 | 95.22% | 22.668<br>13 | 134 | 90.64% | 19.36<br>9   | Abhd16a      |
| 68539  | 1943 | 157 | 90.02% | 22.691<br>47 | 144 | 86.88% | 20.83<br>588 | Tmem10<br>9  |
| 216825 | 4442 | 157 | 76.81% | 9.9256<br>01 | 92  | 55.67% | 5.822<br>794 | Usp22        |
| 56195  | 3364 | 157 | 67.51% | 13.106<br>28 | 113 | 61.86% | 9.443<br>752 | Ptbp2        |
| 231713 | 3105 | 157 | 80.23% | 14.199<br>52 | 133 | 77%    | 12.04<br>238 | Naa25        |

|                                 |       |     |        |              |     |        |              |              |
|---------------------------------|-------|-----|--------|--------------|-----|--------|--------------|--------------|
| 269704                          | 4139  | 157 | 80.67% | 10.652<br>22 | 124 | 69.75% | 8.422<br>643 | Zfp664       |
| 56490                           | 3156  | 157 | 76.11% | 13.970<br>06 | 192 | 87.29% | 17.10<br>355 | Zbtb20       |
| 22209                           | 1661  | 157 | 83.26% | 26.543<br>96 | 158 | 84.89% | 26.74<br>297 | Ube2a        |
| 230654                          | 2883  | 157 | 77.32% | 15.292<br>93 | 151 | 75.10% | 14.72<br>497 | Lrrc41       |
| 278180                          | 1432  | 157 | 28.42% | 30.788<br>77 | 250 | 28.63% | 49.08<br>164 | Vsig4        |
| gi 32484982 ref N<br>M_010139.2 | 3907  | 157 | 69.80% | 11.284<br>75 | 168 | 71.54% | 12.08<br>893 | -            |
| 11990                           | 8740  | 157 | 50.79% | 5.0445<br>67 | 150 | 48.14% | 4.825<br>051 | Atrn         |
| 66164                           | 3129  | 157 | 59.57% | 14.090<br>61 | 176 | 60.56% | 15.81<br>354 | Nip7         |
| 75339                           | 2954  | 157 | 83.38% | 14.925<br>36 | 161 | 85.48% | 15.32<br>278 | Mphosph<br>8 |
| 21763                           | 4947  | 157 | 62.56% | 8.9123<br>75 | 169 | 69.86% | 9.604<br>326 | Tex2         |
| 243842                          | 5360  | 157 | 66.98% | 8.2256<br>57 | 76  | 43.77% | 3.986<br>309 | Gltscr1      |
| 228889                          | 2592  | 157 | 91.05% | 17.009<br>85 | 143 | 89%    | 15.51<br>041 | Ddx27        |
| 52009                           | 2606  | 157 | 81.58% | 16.918<br>46 | 108 | 77.40% | 11.65<br>122 | Hn11         |
| 53881                           | 10918 | 156 | 41.88% | 4.0125<br>2  | 101 | 29.86% | 2.600<br>761 | Slc5a3       |
| 118445                          | 2652  | 156 | 86.12% | 16.519<br>12 | 137 | 80.09% | 14.52<br>343 | Klf16        |
| 232906                          | 8393  | 156 | 49.39% | 5.2196<br>7  | 125 | 38.70% | 4.187<br>115 | Grf1         |
| 22083                           | 4317  | 156 | 80.38% | 10.147<br>95 | 117 | 68.22% | 7.619<br>49  | Ctr9         |
| 19082                           | 1680  | 156 | 85.24% | 26.076<br>6  | 147 | 87.26% | 24.59<br>972 | Prkag1       |
| gi 29789242 ref N<br>M_024451.1 | 4080  | 156 | 79.22% | 10.737<br>43 | 140 | 73.92% | 9.646<br>949 | -            |
| 394432                          | 3294  | 156 | 28.69% | 13.299<br>54 | 141 | 27.87% | 12.03<br>421 | Ugt1a7c      |
| 74533                           | 4152  | 156 | 76.06% | 10.551<br>23 | 121 | 63.10% | 8.193<br>136 | Gzf1         |
| 80748                           | 2809  | 156 | 57.42% | 15.595<br>83 | 153 | 44.78% | 15.31<br>305 | BC0040<br>04 |

|                              |       |     |        |              |     |        |              |              |
|------------------------------|-------|-----|--------|--------------|-----|--------|--------------|--------------|
| 11540                        | 2534  | 156 | 79.60% | 17.288<br>36 | 132 | 70.21% | 14.64<br>5   | Adora2a      |
| 50909                        | 2762  | 156 | 53.15% | 15.861<br>22 | 122 | 50.58% | 12.41<br>819 | C1ra         |
| 77006                        | 1101  | 156 | 93.73% | 39.789<br>91 | 158 | 93.01% | 40.34<br>52  | Ddrgk1       |
| 233863                       | 6891  | 156 | 61.46% | 6.3573<br>78 | 94  | 40.98% | 3.835<br>021 | Gtf3c1       |
| 78308                        | 2095  | 156 | 92.36% | 20.911<br>07 | 133 | 85.63% | 17.84<br>801 | Gpr108       |
| 22764                        | 7012  | 155 | 45.46% | 6.2076<br>25 | 132 | 39.96% | 5.292<br>418 | Zfx          |
| gi 17933765 ref NM_080288.1  | 2186  | 155 | 66.51% | 19.912<br>11 | 126 | 63.95% | 16.20<br>476 | -            |
| 76938                        | 1583  | 155 | 80.35% | 27.497<br>07 | 163 | 80.23% | 28.94<br>868 | Rbm17        |
| 80879                        | 2493  | 155 | 86.72% | 17.460<br>04 | 248 | 91.18% | 27.96<br>736 | Slc16a3      |
| 230073                       | 4943  | 155 | 67.93% | 8.8059<br>62 | 115 | 59.98% | 6.540<br>777 | Ddx58        |
| 59025                        | 4185  | 155 | 47.77% | 10.400<br>92 | 174 | 50.01% | 11.68<br>896 | Usp14        |
| gi 19527197 ref NM_133978.1  | 994   | 155 | 86.82% | 43.790<br>61 | 150 | 91.85% | 42.42<br>55  | -            |
| 94181                        | 1904  | 155 | 85.14% | 22.861<br>28 | 140 | 84.87% | 20.67<br>203 | Nans         |
| gi 295390103 ref NR_033591.1 | 14357 | 155 | 5.41%  | 3.0318<br>22 | 131 | 5.22%  | 2.565<br>25  | -            |
| 12266                        | 5147  | 155 | 13.04% | 8.4569<br>4  | 174 | 12.59% | 9.504<br>236 | C3           |
| 229542                       | 1912  | 155 | 92.73% | 22.765<br>62 | 75  | 82.43% | 11.02<br>797 | Gatad2b      |
| 214137                       | 5133  | 155 | 68.79% | 8.4800<br>06 | 112 | 61.97% | 6.134<br>355 | Arhgap2<br>9 |
| 22318                        | 2164  | 155 | 90.20% | 20.114<br>54 | 129 | 82.99% | 16.75<br>925 | Vamp2        |
| 107566                       | 1930  | 155 | 87.77% | 22.553<br>3  | 91  | 79.95% | 13.25<br>581 | Arl2bp       |
| 100978                       | 3671  | 155 | 77.23% | 11.857<br>22 | 106 | 60.61% | 8.117<br>898 | Nfx11        |
| 52076                        | 2861  | 155 | 75.78% | 15.214<br>22 | 133 | 73.93% | 13.06<br>941 | Tmem38<br>b  |
| 108679                       | 1843  | 154 | 83.99% | 23.465<br>57 | 182 | 89.91% | 27.76<br>311 | Cops8        |

|                                  |      |     |        |              |     |        |              |                   |
|----------------------------------|------|-----|--------|--------------|-----|--------|--------------|-------------------|
| 108123                           | 3496 | 154 | 77.15% | 12.370<br>44 | 135 | 81.78% | 10.85<br>637 | Napg              |
| 76608                            | 4582 | 154 | 65.56% | 9.4384<br>64 | 91  | 50.46% | 5.583<br>524 | Hectd3            |
| 98417                            | 3283 | 154 | 61.56% | 13.173<br>03 | 177 | 56.87% | 15.15<br>739 | Cnih4             |
| 63953                            | 2712 | 154 | 81.23% | 15.946<br>55 | 131 | 78.21% | 13.58<br>012 | Dusp10            |
| 75580                            | 7824 | 154 | 48.68% | 5.5274<br>85 | 109 | 39.66% | 3.916<br>695 | Zbtb4             |
| 54609                            | 3343 | 154 | 79.42% | 12.936<br>6  | 118 | 76.04% | 9.923<br>566 | Ubqln2            |
| 59040                            | 4260 | 154 | 62.39% | 10.151<br>89 | 143 | 55.80% | 9.437<br>317 | Rhot1             |
| 22687                            | 2984 | 154 | 68.87% | 14.492<br>98 | 154 | 61.93% | 14.50<br>922 | Zfp259            |
| 225912                           | 2597 | 154 | 81.17% | 16.652<br>69 | 94  | 73.47% | 10.17<br>602 | Cybas3            |
| 74035                            | 3750 | 153 | 71.41% | 11.457<br>66 | 137 | 68.59% | 10.27<br>097 | Nol9              |
| 79201                            | 3283 | 153 | 74.38% | 13.087<br>49 | 144 | 71.31% | 12.33<br>144 | Tnfrsf23          |
| 224093                           | 3075 | 153 | 80.23% | 13.972<br>75 | 95  | 67.25% | 8.685<br>616 | Fam43a            |
| 98682                            | 4770 | 153 | 71.72% | 9.0075<br>93 | 166 | 64.51% | 9.783<br>896 | Mfsd6             |
| 68045                            | 1510 | 153 | 50.66% | 28.454<br>45 | 175 | 54.50% | 32.58<br>241 | 2700060<br>E02Rik |
| 58250                            | 5532 | 153 | 63.58% | 7.7668<br>51 | 84  | 41.76% | 4.268<br>932 | Chst11            |
| 231874                           | 1786 | 153 | 90.59% | 24.057<br>23 | 134 | 87.63% | 21.09<br>335 | Ccz1              |
| 22782                            | 5230 | 153 | 61.76% | 8.2153<br>38 | 78  | 44.76% | 4.192<br>905 | Slc30a1           |
| 230737                           | 2350 | 153 | 64.55% | 18.283<br>5  | 137 | 64.68% | 16.38<br>984 | Gnl2              |
| 101985                           | 1764 | 153 | 87.59% | 24.357<br>27 | 133 | 84.92% | 21.19<br>704 | AA9604<br>36      |
| gi 142353670 ref N<br>M_028207.2 | 1167 | 153 | 95.54% | 36.817<br>67 | 111 | 95.03% | 26.74<br>079 | -                 |
| 14252                            | 2718 | 153 | 77.15% | 15.808<br>03 | 168 | 80.35% | 17.37<br>729 | Flot2             |
| 67946                            | 2454 | 153 | 81.09% | 17.508<br>65 | 115 | 75.79% | 13.17<br>484 | Spata6            |

|                                     |      |     |        |              |     |        |              |         |
|-------------------------------------|------|-----|--------|--------------|-----|--------|--------------|---------|
| 225523                              | 4572 | 152 | 73.67% | 9.3362<br>63 | 94  | 55.71% | 5.780<br>212 | Cep120  |
| 226414                              | 2249 | 152 | 77.10% | 18.979<br>72 | 126 | 76.92% | 15.75<br>082 | Dars    |
| gi 149270002 ref X<br>M_001475723.1 | 1825 | 152 | 49.10% | 23.389<br>26 | 149 | 49.37% | 22.95<br>332 | -       |
| 75669                               | 4884 | 152 | 68.43% | 8.7398<br>43 | 110 | 57.29% | 6.331<br>974 | Pik3r4  |
| 52530                               | 1004 | 152 | 86.16% | 42.515<br>33 | 134 | 71.71% | 37.52<br>262 | Nhp2    |
| 236511                              | 7065 | 152 | 53.60% | 6.0418<br>11 | 102 | 45.34% | 4.058<br>917 | Eif2c1  |
| gi 149241500 ref X<br>M_001480717.1 | 3712 | 152 | 18.56% | 11.499<br>3  | 197 | 20.96% | 14.92<br>04  | -       |
| 218035                              | 3212 | 152 | 84.18% | 13.289<br>35 | 130 | 76.28% | 11.37<br>863 | Vps41   |
| 67229                               | 3431 | 152 | 85.81% | 12.441<br>09 | 114 | 73.56% | 9.341<br>277 | Prpf18  |
| 231130                              | 1966 | 152 | 90.34% | 21.711<br>8  | 170 | 94.30% | 24.31<br>014 | Tnip2   |
| 70640                               | 8643 | 152 | 49.54% | 4.9387<br>24 | 99  | 33.32% | 3.220<br>274 | Dcp2    |
| 19981                               | 601  | 152 | 40.27% | 71.023<br>95 | 172 | 49.08% | 80.45<br>927 | Rpl37a  |
| 17999                               | 5494 | 152 | 71.22% | 7.7694<br>57 | 198 | 74.12% | 10.13<br>208 | Nedd4   |
| 78317                               | 4959 | 152 | 72.55% | 8.6076<br>62 | 188 | 70.64% | 10.65<br>825 | Ccdc88b |
| 16548                               | 1117 | 152 | 86.84% | 38.214<br>32 | 285 | 87.91% | 71.73<br>214 | Khk     |
| 12257                               | 871  | 152 | 92.54% | 49.007<br>34 | 199 | 93.46% | 64.23<br>283 | Tspo    |
| 78455                               | 6240 | 151 | 61.09% | 6.7956<br>04 | 138 | 57.02% | 6.217<br>512 | Helz    |
| gi 146149107 ref N<br>M_133715.4    | 3512 | 151 | 73.09% | 12.074<br>19 | 104 | 68.17% | 8.325<br>32  | -       |
| 67399                               | 2636 | 151 | 68.97% | 16.086<br>71 | 216 | 69.20% | 23.03<br>724 | Pdlim7  |
| 21991                               | 1601 | 151 | 55.90% | 26.486<br>3  | 139 | 58.21% | 24.40<br>875 | Tpi1    |
| 52705                               | 4990 | 151 | 58.36% | 8.4979<br>1  | 130 | 56.57% | 7.324<br>28  | Krr1    |
| gi 118131183 ref N<br>M_007575.2    | 5153 | 151 | 67.03% | 8.2291<br>03 | 70  | 45.08% | 3.819<br>091 | -       |

|        |      |     |        |              |     |        |              |                   |
|--------|------|-----|--------|--------------|-----|--------|--------------|-------------------|
| 26430  | 4391 | 151 | 70.76% | 9.6571<br>55 | 97  | 58.12% | 6.210<br>555 | Parg              |
| 68837  | 5032 | 151 | 67.97% | 8.4269<br>81 | 128 | 64.15% | 7.151<br>406 | Foxk2             |
| 14057  | 2811 | 151 | 83.74% | 15.085<br>23 | 120 | 79.72% | 12.00<br>169 | Sfxn1             |
| 192285 | 6484 | 151 | 50.37% | 6.5398<br>78 | 98  | 42.49% | 4.249<br>181 | Phf21a            |
| 217166 | 2627 | 151 | 79.14% | 16.141<br>82 | 271 | 83.17% | 29.00<br>223 | Nr1d1             |
| 56443  | 1588 | 151 | 93.26% | 26.703<br>13 | 134 | 92.88% | 23.72<br>337 | Arpc1a            |
| 68441  | 1653 | 151 | 76.89% | 25.653<br>1  | 142 | 81.43% | 24.15<br>114 | Rraga             |
| 78334  | 5828 | 151 | 68.15% | 7.2760<br>07 | 110 | 52.20% | 5.306<br>342 | Cdk19             |
| 107817 | 1688 | 151 | 82.64% | 25.121<br>19 | 163 | 84.24% | 27.14<br>796 | Jmjd6             |
| 1E+08  | 5181 | 151 | 66.42% | 8.1846<br>3  | 150 | 59%    | 8.139<br>539 | BC0055<br>61      |
| 19231  | 1192 | 151 | 15.02% | 35.574<br>3  | 141 | 14.77% | 33.25<br>561 | Ptma              |
| 66775  | 2089 | 151 | 90%    | 20.298<br>98 | 176 | 94.26% | 23.68<br>625 | Ptplad2           |
| 70767  | 2732 | 151 | 78.99% | 15.521<br>44 | 141 | 76.76% | 14.50<br>977 | Prpf3             |
| 67382  | 5429 | 151 | 69.22% | 7.8107<br>51 | 97  | 48.52% | 5.023<br>125 | Brd3              |
| 67544  | 5831 | 150 | 56.51% | 7.2241<br>03 | 110 | 46.97% | 5.303<br>612 | Fam120b           |
| 67726  | 2608 | 150 | 79.26% | 16.151<br>74 | 124 | 76%    | 13.36<br>707 | Fam114a<br>2      |
| 74140  | 2516 | 150 | 77.50% | 16.742<br>35 | 116 | 71.30% | 12.96<br>192 | Tm9sf1            |
| 67130  | 560  | 150 | 84.29% | 75.220<br>97 | 150 | 90.54% | 75.30<br>527 | Ndufa6            |
| 76108  | 4174 | 150 | 72.74% | 10.091<br>94 | 80  | 59.03% | 5.388<br>398 | Rap2a             |
| 212483 | 4356 | 150 | 70.80% | 9.6702<br>81 | 101 | 51.31% | 6.518<br>619 | Fam193b           |
| 320808 | 5707 | 150 | 59.19% | 7.3810<br>66 | 93  | 46.50% | 4.581<br>389 | Dcaf5             |
| 69816  | 928  | 150 | 91.81% | 45.391<br>97 | 133 | 97.20% | 40.29<br>265 | 2010001<br>M09Rik |

|                              |       |     |        |              |     |        |              |                   |
|------------------------------|-------|-----|--------|--------------|-----|--------|--------------|-------------------|
| 66799                        | 2354  | 150 | 70.39% | 17.894<br>54 | 127 | 76.72% | 15.16<br>769 | Ube2w             |
| 70802                        | 4096  | 150 | 62.21% | 10.284<br>12 | 147 | 61.72% | 10.08<br>973 | Pwwp2a            |
| gi 45504366 ref NM_206536.1  | 579   | 150 | 96.72% | 72.752<br>58 | 184 | 97.58% | 89.34<br>317 | -                 |
| gi 196259836 ref NM_008292.3 | 2612  | 150 | 87.33% | 16.127<br>01 | 164 | 89.43% | 17.65<br>195 | -                 |
| 76482                        | 2134  | 150 | 88.19% | 19.739<br>34 | 134 | 80.97% | 17.65<br>357 | 3110002<br>H16Rik |
| 21856                        | 1798  | 150 | 96.22% | 23.428<br>11 | 101 | 85.76% | 15.79<br>261 | Timm44            |
| 79263                        | 3085  | 150 | 81.20% | 13.654<br>37 | 100 | 73.68% | 9.113<br>117 | Trim39            |
| 80289                        | 3139  | 150 | 83.72% | 13.419<br>48 | 130 | 77.54% | 11.64<br>325 | Lysmd3            |
| 67204                        | 2513  | 150 | 45.92% | 16.762<br>33 | 187 | 48.07% | 20.92<br>046 | Eif2s2            |
| 20807                        | 4093  | 150 | 61.86% | 10.291<br>66 | 144 | 63.96% | 9.891<br>061 | Srf               |
| 269180                       | 5689  | 150 | 61.21% | 7.4044<br>2  | 110 | 48.06% | 5.435<br>993 | Inpp4a            |
| 231672                       | 4978  | 150 | 54.36% | 8.4619<br>82 | 132 | 51.65% | 7.454<br>889 | Fbxw8             |
| 66549                        | 3213  | 150 | 79.12% | 13.110<br>41 | 118 | 68.44% | 10.32<br>508 | Aggf1             |
| 109151                       | 11517 | 149 | 41.19% | 3.6331<br>44 | 86  | 25.88% | 2.099<br>332 | Chd9              |
| 17387                        | 2597  | 149 | 88.72% | 16.112<br>02 | 105 | 78.71% | 11.36<br>683 | Mmp14             |
| 381820                       | 2509  | 149 | 80.27% | 16.677<br>13 | 119 | 76.25% | 13.33<br>424 | 2700089<br>E24Rik |
| 269389                       | 1675  | 149 | 86.63% | 24.980<br>85 | 160 | 90.27% | 26.85<br>513 | Tox2              |
| 70750                        | 5582  | 149 | 55.48% | 7.4960<br>44 | 125 | 55.86% | 6.295<br>675 | Kdsr              |
| 215751                       | 1557  | 149 | 91.91% | 26.874<br>07 | 104 | 89.34% | 18.77<br>876 | Ginm1             |
| 20399                        | 3422  | 149 | 78.61% | 12.227<br>62 | 109 | 70.25% | 8.955<br>062 | Sh2b1             |
| 26420                        | 4682  | 149 | 59.16% | 8.9369<br>76 | 121 | 60.98% | 7.265<br>677 | Mapk9             |
| 226844                       | 4087  | 149 | 59.82% | 10.238<br>05 | 130 | 62.81% | 8.942<br>539 | Mfsd7b            |

|                              |      |     |        |              |     |        |              |              |
|------------------------------|------|-----|--------|--------------|-----|--------|--------------|--------------|
| 212528                       | 2186 | 149 | 86.78% | 19.141<br>32 | 138 | 85.50% | 17.74<br>807 | Trmt1        |
| 19070                        | 2845 | 149 | 81.12% | 14.707<br>53 | 159 | 83.90% | 15.71<br>22  | Mob4         |
| 109108                       | 3411 | 149 | 73%    | 12.267<br>05 | 126 | 70.83% | 10.38<br>511 | Slc30a9      |
| 73288                        | 5072 | 149 | 59.66% | 8.2497<br>87 | 121 | 51.66% | 6.706<br>999 | Ccdc132      |
| 73910                        | 3616 | 149 | 77.05% | 11.571<br>6  | 128 | 67.84% | 9.951<br>846 | Arhgap1<br>8 |
| 15369                        | 1274 | 149 | 64.84% | 32.843<br>74 | 147 | 66.64% | 32.43<br>919 | Hmox2        |
| 433022                       | 7352 | 149 | 51.50% | 5.6913<br>66 | 119 | 37.64% | 4.550<br>547 | Plcxd2       |
| gi 133892883 ref NM_134129.3 | 2073 | 148 | 87.70% | 20.049<br>25 | 160 | 88.62% | 21.69<br>915 | -            |
| gi 70794812 ref NM_021421.3  | 2437 | 148 | 84.82% | 17.054<br>61 | 98  | 83.91% | 11.30<br>558 | -            |
| 50850                        | 4696 | 148 | 68.10% | 8.8505<br>31 | 147 | 66.42% | 8.800<br>581 | Spast        |
| 229700                       | 3270 | 148 | 80.80% | 12.710<br>12 | 150 | 76.57% | 12.89<br>631 | Rbm15        |
| 21807                        | 4588 | 148 | 44.33% | 9.0588<br>7  | 155 | 38.21% | 9.497<br>962 | Tsc22d1      |
| 433702                       | 3167 | 148 | 80.64% | 13.123<br>49 | 106 | 69.47% | 9.409<br>79  | Ncbp1        |
| 66615                        | 2964 | 148 | 76.11% | 14.022<br>3  | 115 | 72.03% | 10.90<br>792 | Atg4b        |
| 93683                        | 4626 | 148 | 73.41% | 8.9844<br>56 | 99  | 59.12% | 6.016<br>608 | Glce         |
| 70465                        | 3553 | 148 | 63.38% | 11.697<br>75 | 117 | 62.26% | 9.257<br>906 | Wdr77        |
| 67068                        | 702  | 148 | 92.59% | 59.205<br>26 | 168 | 94.02% | 67.28<br>129 | Dynlrb1      |
| 101358                       | 4219 | 148 | 53.61% | 9.8511<br>72 | 108 | 45.44% | 7.196<br>749 | Fbxl14       |
| 59044                        | 1501 | 148 | 37.77% | 27.689<br>6  | 143 | 37.11% | 26.78<br>412 | Rnf130       |
| 20115                        | 961  | 148 | 16.96% | 43.248<br>8  | 129 | 9.99%  | 37.73<br>883 | Rps7         |
| 434223                       | 7743 | 148 | 43.06% | 5.3676<br>99 | 73  | 25.47% | 2.650<br>548 | Gm1966       |
| 71954                        | 2436 | 148 | 83.21% | 17.061<br>62 | 112 | 74.01% | 12.92<br>596 | Suds3        |



|                                 |       |     |        |              |     |        |              |                   |
|---------------------------------|-------|-----|--------|--------------|-----|--------|--------------|-------------------|
| 230787                          | 2542  | 148 | 88.71% | 16.350<br>16 | 78  | 70.46% | 8.626<br>63  | Themis2           |
| 65961                           | 1610  | 148 | 93.98% | 25.814<br>97 | 182 | 92.86% | 31.78<br>101 | Utp3              |
| 13429                           | 3843  | 148 | 72.16% | 10.815<br>01 | 148 | 67.84% | 10.82<br>713 | Dnm1              |
| 17000                           | 2109  | 147 | 88.24% | 19.573<br>86 | 112 | 86.53% | 14.93<br>013 | Ltbr              |
| 66869                           | 3302  | 147 | 71.23% | 12.501<br>9  | 124 | 74.83% | 10.55<br>764 | Zfp869            |
| 70683                           | 8831  | 147 | 47.13% | 4.6745<br>86 | 95  | 32.48% | 3.024<br>376 | Utp20             |
| 231600                          | 3166  | 147 | 81.81% | 13.038<br>94 | 122 | 77.76% | 10.83<br>356 | Chfr              |
| 237859                          | 3114  | 147 | 57.61% | 13.256<br>67 | 119 | 51.22% | 10.74<br>362 | Ccdc55            |
| 14083                           | 4414  | 147 | 71.68% | 9.3523<br>49 | 103 | 60.38% | 6.560<br>35  | Ptk2              |
| 229323                          | 2225  | 147 | 73.84% | 18.553<br>38 | 103 | 68.85% | 13.01<br>456 | Gpr171            |
| 59288                           | 1532  | 147 | 92.49% | 26.946       | 112 | 95.69% | 20.55<br>329 | Dctn5             |
| 78286                           | 11332 | 147 | 44.72% | 3.6428<br>94 | 140 | 36.41% | 3.473<br>31  | Nav2              |
| 246694                          | 4828  | 147 | 65.43% | 8.5503<br>87 | 133 | 57.27% | 7.744<br>734 | Hps5              |
| 107569                          | 1687  | 147 | 79.49% | 24.470<br>22 | 187 | 81.86% | 31.16<br>367 | Nt5c3             |
| 67426                           | 4026  | 147 | 58.35% | 10.253<br>67 | 113 | 52.01% | 7.890<br>905 | Adck3             |
| 67705                           | 1269  | 147 | 79.35% | 32.530<br>55 | 171 | 82.19% | 37.88<br>407 | 1810058<br>I24Rik |
| 15356                           | 1416  | 147 | 94.63% | 29.153<br>44 | 113 | 89.62% | 22.43<br>558 | Hmgcl             |
| 75914                           | 5440  | 147 | 69.56% | 7.5884<br>69 | 146 | 63.01% | 7.545<br>292 | Exoc6b            |
| gi 39930476 ref N<br>M_033144.1 | 4583  | 147 | 69.58% | 9.0074<br>78 | 90  | 52.15% | 5.520<br>962 | -                 |
| 74772                           | 4327  | 147 | 34.02% | 9.5403<br>9  | 123 | 31.99% | 7.991<br>721 | Atp13a2           |
| 13680                           | 2580  | 146 | 64.84% | 15.891<br>65 | 110 | 65.47% | 11.98<br>657 | Ddx19a            |
| 66989                           | 2400  | 146 | 85.67% | 17.083<br>52 | 105 | 73.58% | 12.29<br>986 | Kctd20            |

|                                  |       |     |        |              |     |        |              |        |
|----------------------------------|-------|-----|--------|--------------|-----|--------|--------------|--------|
| 234847                           | 2558  | 146 | 77.83% | 16.028<br>32 | 95  | 71.85% | 10.44<br>107 | Spg7   |
| 98910                            | 4824  | 146 | 69.36% | 8.4992<br>63 | 104 | 56.34% | 6.061<br>054 | Usp6nl |
| 55946                            | 4424  | 146 | 46.93% | 9.2677<br>32 | 118 | 39.92% | 7.498<br>752 | Ap3m1  |
| gi 27734185 ref N<br>M_173388.1  | 4389  | 146 | 75.44% | 9.3416<br>37 | 94  | 60.86% | 6.021<br>219 | -      |
| 211228                           | 1273  | 146 | 97.96% | 32.207<br>73 | 172 | 97.96% | 37.98<br>588 | Lrrc25 |
| 56351                            | 1954  | 146 | 42.68% | 20.982<br>83 | 189 | 49.54% | 27.19<br>314 | Ptges3 |
| 11370                            | 2158  | 146 | 88.04% | 18.999<br>28 | 173 | 90.45% | 22.53<br>807 | Acadvl |
| gi 110556651 ref N<br>M_017479.2 | 6925  | 146 | 54.61% | 5.9206<br>42 | 80  | 36.55% | 3.247<br>823 | -      |
| 56717                            | 8612  | 146 | 47.70% | 4.7608<br>51 | 79  | 29.91% | 2.578<br>963 | Mtor   |
| gi 116089307 ref N<br>M_173048.2 | 3671  | 146 | 82.54% | 11.168<br>74 | 115 | 70.91% | 8.807<br>154 | -      |
| 270163                           | 11974 | 145 | 39.54% | 3.4006<br>7  | 138 | 36.78% | 3.240<br>126 | Myo9a  |
| 319481                           | 5168  | 145 | 65.36% | 7.8791<br>83 | 138 | 63.78% | 7.507<br>212 | Wdr59  |
| 19411                            | 2917  | 145 | 76.17% | 13.959<br>42 | 141 | 69.04% | 13.58<br>954 | Rarg   |
| 15284                            | 2171  | 145 | 86.92% | 18.756<br>16 | 111 | 80.01% | 14.37<br>425 | Hlx    |
| 21355                            | 2490  | 145 | 79.32% | 16.353<br>26 | 134 | 78.31% | 15.12<br>96  | Tap2   |
| 99889                            | 3023  | 145 | 78.83% | 13.469<br>94 | 125 | 69.93% | 11.62<br>503 | Arfp1  |
| 70799                            | 8125  | 145 | 49.55% | 5.0116<br>45 | 94  | 35.67% | 3.252<br>57  | Cep192 |
| 70396                            | 2362  | 145 | 88.61% | 17.239<br>47 | 109 | 82.43% | 12.97<br>385 | Asnsd1 |
| 22791                            | 2037  | 145 | 90.18% | 19.989<br>99 | 135 | 86.06% | 18.63<br>223 | Dnajc2 |
| 30046                            | 9977  | 145 | 46.79% | 4.0813<br>49 | 55  | 22.41% | 1.549<br>833 | Zfp292 |
| gi 9790226 ref NM<br>_019773.1   | 1276  | 145 | 83.31% | 31.911<br>93 | 129 | 82.29% | 28.42<br>243 | -      |
| 50723                            | 2748  | 145 | 84.24% | 14.817<br>91 | 153 | 81.99% | 15.65<br>297 | Icosl  |

|        |       |     |        |              |     |        |              |                   |
|--------|-------|-----|--------|--------------|-----|--------|--------------|-------------------|
| 21917  | 3776  | 145 | 36.49% | 10.783<br>8  | 121 | 24.89% | 9.008<br>977 | Tmpo              |
| 230648 | 4320  | 145 | 66.25% | 9.4258<br>38 | 120 | 64.42% | 7.809<br>435 | 4732418<br>C07Rik |
| 66827  | 1469  | 145 | 95.30% | 27.719<br>28 | 180 | 95.23% | 34.44<br>87  | Ttc1              |
| 69587  | 3731  | 144 | 77.30% | 10.838<br>59 | 102 | 65.99% | 7.685<br>941 | Pcgf3             |
| 73836  | 2138  | 144 | 83.21% | 18.914<br>31 | 117 | 73.25% | 15.38<br>51  | Slc35b2           |
| 171580 | 3563  | 144 | 69.46% | 11.349<br>65 | 111 | 57.42% | 8.758<br>491 | Mical1            |
| 56529  | 1113  | 144 | 94.16% | 36.333<br>15 | 140 | 94.79% | 35.36<br>348 | Sec11a            |
| 242785 | 3895  | 144 | 74.66% | 10.382<br>23 | 115 | 65.39% | 8.300<br>658 | Klhl21            |
| 228998 | 2852  | 144 | 73.42% | 14.179<br>1  | 132 | 67.36% | 13.01<br>207 | Arfgap1           |
| 18103  | 777   | 144 | 58.30% | 52.044<br>78 | 145 | 58.30% | 52.46<br>493 | Nme2              |
| 20191  | 16813 | 144 | 26.66% | 2.4052<br>1  | 221 | 31.78% | 3.695<br>466 | Ryr2              |
| 52397  | 5700  | 144 | 59.37% | 7.0945<br>25 | 80  | 38.89% | 3.945<br>82  | Zfp644            |
| 17217  | 3589  | 144 | 75.98% | 11.267<br>43 | 112 | 69.02% | 8.773<br>375 | Mcm4              |
| 234736 | 4443  | 144 | 72.56% | 9.1016<br>87 | 111 | 59.51% | 7.023<br>746 | Rfwd3             |
| 14369  | 4840  | 144 | 61.30% | 8.3551<br>23 | 124 | 53.74% | 7.202<br>752 | Fzd7              |
| 78938  | 3557  | 144 | 64.01% | 11.368<br>79 | 142 | 64.97% | 11.22<br>346 | Fbxo34            |
| 67440  | 2651  | 144 | 86.04% | 15.254<br>17 | 114 | 76.08% | 12.08<br>975 | Mtpap             |
| 18750  | 8385  | 144 | 52.33% | 4.8227<br>54 | 113 | 45.30% | 3.788<br>763 | Prkca             |
| 73728  | 3950  | 144 | 37.87% | 10.237<br>67 | 213 | 39.04% | 15.16<br>019 | Psd               |
| 76499  | 6369  | 144 | 49.90% | 6.3493<br>16 | 81  | 36.72% | 3.575<br>493 | Clasp2            |
| 13626  | 2060  | 144 | 74.85% | 19.630<br>48 | 128 | 77.72% | 17.46<br>887 | Eed               |
| 13544  | 2953  | 144 | 83.51% | 13.694<br>14 | 88  | 67.12% | 8.378<br>019 | Dvl3              |

|                                  |      |     |        |              |     |        |              |              |
|----------------------------------|------|-----|--------|--------------|-----|--------|--------------|--------------|
| gi 146149280 ref N<br>M_145972.3 | 2716 | 144 | 80.30% | 14.889<br>1  | 101 | 76.29% | 10.45<br>475 | -            |
| 13358                            | 1695 | 144 | 89.03% | 23.857<br>7  | 121 | 82.77% | 20.06<br>956 | Slc25a1      |
| 14700                            | 1120 | 144 | 83.04% | 36.106<br>07 | 152 | 90.80% | 38.15<br>467 | Gng10        |
| 67247                            | 1883 | 143 | 62.72% | 21.326<br>59 | 143 | 62.93% | 21.35<br>049 | Mosc2        |
| 17937                            | 2593 | 143 | 78.79% | 15.487<br>07 | 159 | 75.55% | 17.23<br>918 | Nab2         |
| 13591                            | 2248 | 143 | 88.66% | 17.863<br>87 | 99  | 83.23% | 12.38<br>115 | Ebf1         |
| 75869                            | 3594 | 143 | 66.14% | 11.173<br>61 | 168 | 76.99% | 13.14<br>175 | Arl5b        |
| 330723                           | 2181 | 143 | 81.34% | 18.412<br>64 | 138 | 82.12% | 17.78<br>875 | Htra4        |
| 74450                            | 4266 | 143 | 68.92% | 9.4134<br>95 | 88  | 45.34% | 5.799<br>412 | Pank2        |
| 78232                            | 1272 | 143 | 80.50% | 31.570<br>73 | 120 | 76.49% | 26.52<br>261 | Trappc6<br>b |
| 20321                            | 2546 | 143 | 59.58% | 15.772<br>97 | 155 | 63.20% | 17.11<br>573 | Frrs1        |
| 15499                            | 2018 | 143 | 95.04% | 19.899<br>89 | 125 | 81.91% | 17.41<br>45  | Hsf1         |
| gi 19527201 ref N<br>M_133981.1  | 2584 | 143 | 86.34% | 15.541<br>01 | 116 | 69.39% | 12.62<br>082 | -            |
| 100710                           | 7311 | 143 | 54.42% | 5.4928<br>15 | 85  | 37.60% | 3.268<br>619 | Pds5b        |
| 17764                            | 7631 | 143 | 53.62% | 5.2624<br>78 | 159 | 56.55% | 5.857<br>844 | Mtf1         |
| 73078                            | 1596 | 143 | 90.60% | 25.161<br>64 | 136 | 89.16% | 23.95<br>676 | Pmpcb        |
| 75613                            | 2291 | 143 | 90%    | 17.528<br>58 | 125 | 81.10% | 15.33<br>935 | Med25        |
| 224938                           | 4706 | 143 | 69.53% | 8.5333<br>55 | 104 | 53.55% | 6.213<br>031 | Pja2         |
| 60365                            | 2631 | 143 | 36.56% | 15.263<br>39 | 149 | 51.92% | 15.92<br>163 | Rbm8a        |
| 76510                            | 4688 | 143 | 35.81% | 8.5661<br>2  | 135 | 28.43% | 8.095<br>959 | Trappc9      |
| 108686                           | 9263 | 143 | 46.15% | 4.3353<br>09 | 102 | 39.38% | 3.095<br>784 | Ccdc88a      |
| 56459                            | 1871 | 143 | 87.39% | 21.463<br>37 | 92  | 85.84% | 13.82<br>408 | Sae1         |

|        |      |     |        |              |     |        |              |                   |
|--------|------|-----|--------|--------------|-----|--------|--------------|-------------------|
| 66492  | 2257 | 143 | 79.09% | 17.792<br>63 | 150 | 79.71% | 18.68<br>451 | Zmat2             |
| 77591  | 3368 | 143 | 72.06% | 11.923<br>39 | 131 | 66.51% | 10.93<br>506 | Ddx10             |
| 319965 | 3286 | 143 | 80.28% | 12.220<br>93 | 95  | 67.22% | 8.127<br>896 | Cc2d1b            |
| 68364  | 4649 | 143 | 66.51% | 8.6379<br>8  | 95  | 55.13% | 5.744<br>949 | 0610030<br>E20Rik |
| 19184  | 1277 | 142 | 98.36% | 31.227<br>21 | 165 | 98.75% | 36.32<br>58  | Psmc5             |
| 93685  | 6050 | 142 | 52.07% | 6.5912<br>64 | 158 | 54.64% | 7.342<br>16  | Entpd7            |
| 26394  | 1593 | 142 | 92.40% | 25.032<br>73 | 148 | 90.40% | 26.11<br>969 | Lypla2            |
| 19124  | 1504 | 142 | 89.56% | 26.514<br>06 | 124 | 90.29% | 23.17<br>907 | Procr             |
| 21376  | 1583 | 142 | 89.45% | 25.190<br>87 | 128 | 80.48% | 22.73<br>271 | Tbrg1             |
| 353502 | 1243 | 142 | 66.29% | 32.081<br>37 | 133 | 52.45% | 30.08<br>172 | Hcfc1r1           |
| 14547  | 2871 | 142 | 80.49% | 13.889<br>64 | 95  | 65.48% | 9.302<br>775 | Gdap2             |
| 230815 | 4715 | 142 | 64.05% | 8.4575<br>07 | 121 | 59.30% | 7.214<br>825 | Man1c1            |
| 70314  | 2539 | 142 | 81.61% | 15.705<br>85 | 69  | 69.55% | 7.640<br>266 | Rabep2            |
| 228536 | 4428 | 142 | 68.54% | 9.0056<br>79 | 115 | 64.32% | 7.301<br>504 | Bahd1             |
| 101861 | 3260 | 142 | 78.90% | 12.232<br>25 | 73  | 59.94% | 6.295<br>459 | Ints4             |
| 66510  | 1397 | 142 | 85.83% | 28.544<br>84 | 127 | 91.77% | 25.55<br>815 | Rnf181            |
| 94315  | 2090 | 142 | 89.57% | 19.079<br>97 | 146 | 83.64% | 19.63<br>942 | Prcc              |
| 68675  | 4036 | 142 | 75.15% | 9.8803<br>63 | 122 | 68.66% | 8.498<br>275 | Fam172a           |
| 108150 | 4363 | 142 | 70.23% | 9.1398<br>45 | 133 | 67.43% | 8.570<br>152 | Galnt7            |
| 66286  | 770  | 142 | 99.35% | 51.788<br>5  | 195 | 99.35% | 71.19<br>771 | Sec11c            |
| 338367 | 5353 | 142 | 64.41% | 7.4494<br>95 | 107 | 58.36% | 5.619<br>642 | Myo1d             |
| 11836  | 2405 | 142 | 83.20% | 16.580<br>93 | 116 | 84.24% | 13.56<br>017 | Araf              |

|                                  |      |     |        |              |     |        |              |         |
|----------------------------------|------|-----|--------|--------------|-----|--------|--------------|---------|
| 11813                            | 667  | 141 | 90.55% | 59.364<br>8  | 262 | 83.21% | 110.4<br>327 | Apoc2   |
| gi 158517905 ref N<br>M_026346.2 | 2722 | 141 | 81.59% | 14.546<br>77 | 56  | 59.81% | 5.783<br>917 | -       |
| 20639                            | 1230 | 141 | 77.15% | 32.192<br>13 | 192 | 75.53% | 43.88<br>522 | Snrpb2  |
| gi 142380546 ref N<br>M_133992.2 | 4439 | 141 | 75.87% | 8.9200<br>99 | 100 | 63.19% | 6.333<br>401 | -       |
| gi 158508626 ref N<br>M_012025.6 | 3030 | 141 | 70.30% | 13.068<br>09 | 96  | 63.89% | 8.907<br>395 | -       |
| 227399                           | 5565 | 141 | 59.77% | 7.1152<br>42 | 82  | 34.65% | 4.142<br>579 | Ppip5k2 |
| 70285                            | 1990 | 141 | 49.10% | 19.897<br>65 | 129 | 45.03% | 18.22<br>463 | Rpf1    |
| 81000                            | 9342 | 141 | 47.28% | 4.2385<br>27 | 90  | 31.82% | 2.708<br>475 | Rad54l2 |
| 53332                            | 4652 | 141 | 64.62% | 8.5116<br>77 | 126 | 65.48% | 7.614<br>703 | Mtmr1   |
| 66663                            | 2402 | 141 | 80.18% | 16.484<br>73 | 131 | 79.02% | 15.33<br>276 | Uba5    |
| 16330                            | 3826 | 141 | 70.75% | 10.349<br>27 | 68  | 42.79% | 4.996<br>732 | Inpp5b  |
| 218294                           | 5859 | 141 | 58.85% | 6.7582<br>04 | 152 | 60.69% | 7.293<br>604 | Cdc14b  |
| 68166                            | 5033 | 141 | 67.14% | 7.8673<br>4  | 94  | 48.30% | 5.250<br>771 | Spire1  |
| 68098                            | 1967 | 141 | 78.39% | 20.130<br>31 | 89  | 68.02% | 12.72<br>06  | Rchyl1  |
| 223881                           | 2203 | 141 | 72.72% | 17.973<br>82 | 180 | 77.17% | 22.97<br>101 | Rnd1    |
| 69608                            | 3881 | 141 | 79.72% | 10.202<br>61 | 111 | 64.75% | 8.040<br>841 | Sec24d  |
| gi 170671719 ref N<br>M_023712.2 | 2701 | 141 | 77.16% | 14.659<br>87 | 128 | 69.20% | 13.32<br>317 | -       |
| 114332                           | 2607 | 141 | 90.33% | 15.188<br>46 | 144 | 86.34% | 15.52<br>9   | Lyve1   |
| 52609                            | 2893 | 140 | 88.80% | 13.589<br>87 | 61  | 61.60% | 5.927<br>936 | Cbx7    |
| 23837                            | 1215 | 140 | 97.37% | 32.358<br>43 | 160 | 95.97% | 37.02<br>251 | Cfdp1   |
| 75841                            | 4348 | 140 | 60.51% | 9.0422<br>02 | 131 | 57.54% | 8.470<br>399 | Rnf139  |
| 239719                           | 8295 | 140 | 49.93% | 4.7396<br>62 | 79  | 31.67% | 2.677<br>521 | Mkl2    |

|                                     |       |     |        |              |     |        |              |                   |
|-------------------------------------|-------|-----|--------|--------------|-----|--------|--------------|-------------------|
| 11766                               | 2694  | 140 | 76.17% | 14.593<br>72 | 89  | 61.80% | 9.287<br>836 | Ap1g2             |
| 223754                              | 3248  | 140 | 82.45% | 12.104<br>52 | 131 | 77.22% | 11.33<br>907 | Tbc1d22<br>a      |
| 22688                               | 11407 | 140 | 35.50% | 3.4466<br>11 | 81  | 24.95% | 1.996<br>345 | Zfp26             |
| 67967                               | 3002  | 140 | 79.05% | 13.096<br>43 | 94  | 70.72% | 8.803<br>174 | Pold3             |
| 216724                              | 2657  | 140 | 85.51% | 14.796<br>95 | 111 | 67.44% | 11.74<br>501 | Rufy1             |
| 68294                               | 1903  | 140 | 90.07% | 20.659<br>75 | 144 | 86.71% | 21.27<br>384 | Mfsd10            |
| 98685                               | 2681  | 140 | 76.17% | 14.664<br>49 | 93  | 70.94% | 9.752<br>327 | 1190005<br>F20Rik |
| 21945                               | 2733  | 139 | 71.35% | 14.282<br>72 | 122 | 62.28% | 12.54<br>996 | Dedd              |
| 17826                               | 1229  | 139 | 85.92% | 31.761<br>33 | 174 | 88.53% | 39.80<br>334 | Fam89b            |
| 12915                               | 2530  | 139 | 79.37% | 15.428<br>72 | 118 | 84.31% | 13.11<br>244 | Atf6b             |
| 210106                              | 4017  | 139 | 69.33% | 9.7173<br>69 | 107 | 66.67% | 7.488<br>659 | Papd7             |
| 67379                               | 1828  | 139 | 81.95% | 21.353<br>76 | 73  | 57.33% | 11.22<br>713 | Dedd2             |
| 218850                              | 7581  | 139 | 49.76% | 5.1490<br>13 | 103 | 40.15% | 3.819<br>732 | D14Abb<br>1e      |
| 72322                               | 3709  | 139 | 75.06% | 10.524<br>31 | 92  | 62.50% | 6.973<br>537 | Xpo5              |
| 26441                               | 1096  | 139 | 64.87% | 35.615<br>57 | 158 | 67.61% | 40.52<br>926 | Psma4             |
| 23997                               | 1563  | 139 | 84.01% | 24.974<br>2  | 145 | 82.60% | 26.08<br>141 | Psmd13            |
| 320661                              | 6720  | 139 | 55.10% | 5.8087<br>31 | 102 | 48.07% | 4.267<br>298 | D5Erd5<br>79e     |
| 17149                               | 613   | 139 | 95.76% | 63.678<br>09 | 148 | 96.74% | 67.87<br>711 | Magoh             |
| 104099                              | 7001  | 139 | 50.29% | 5.5755<br>85 | 111 | 44.77% | 4.457<br>435 | Itga9             |
| 68514                               | 2310  | 139 | 86.80% | 16.898<br>13 | 114 | 81.08% | 13.87<br>442 | Efha1             |
| 19188                               | 906   | 139 | 67.99% | 43.084<br>62 | 128 | 67.66% | 39.71<br>951 | Psme2             |
| gi 149260595 ref X<br>M_001474871.1 | 4850  | 139 | 26.72% | 8.0483<br>86 | 182 | 29.18% | 10.54<br>998 | -                 |

|                                 |      |     |        |              |     |        |              |              |
|---------------------------------|------|-----|--------|--------------|-----|--------|--------------|--------------|
| 72461                           | 2964 | 139 | 33.43% | 13.169<br>59 | 135 | 33.64% | 12.80<br>494 | Prcp         |
| 67433                           | 5764 | 139 | 22.28% | 6.7721<br>5  | 117 | 16.08% | 5.706<br>686 | Ccdc127      |
| 277939                          | 7813 | 139 | 48.59% | 4.9961<br>18 | 61  | 28.52% | 2.194<br>998 | C2cd3        |
| 67488                           | 2840 | 139 | 82.15% | 13.744<br>6  | 106 | 70.67% | 10.49<br>324 | Calcoco1     |
| 22038                           | 2141 | 139 | 45.31% | 18.231<br>98 | 99  | 43.76% | 12.99<br>992 | Plscr1       |
| 234549                          | 3190 | 139 | 74.73% | 12.236<br>57 | 116 | 69.56% | 10.22<br>326 | Heatr3       |
| 219181                          | 9416 | 139 | 49.46% | 4.1455<br>68 | 97  | 35.82% | 2.896<br>192 | Akap11       |
| 76863                           | 1201 | 139 | 95.17% | 32.501<br>81 | 163 | 88.09% | 38.15<br>634 | Dcun1d5      |
| 330836                          | 3730 | 138 | 79.22% | 10.389<br>77 | 119 | 69.20% | 8.969<br>335 | Slc7a6       |
| 107823                          | 7806 | 138 | 25.30% | 4.9646<br>23 | 99  | 15.67% | 3.565<br>568 | Whsc1        |
| 109095                          | 3016 | 138 | 65.12% | 12.849<br>42 | 93  | 56.93% | 8.669<br>094 | Rbm15b       |
| 11739                           | 1142 | 138 | 92.38% | 33.935<br>07 | 136 | 93.78% | 33.48<br>073 | Slc25a4      |
| 54638                           | 2274 | 138 | 78.41% | 17.042<br>15 | 134 | 74.32% | 16.56<br>672 | Ccdc22       |
| 94275                           | 2752 | 138 | 80.60% | 14.082<br>07 | 129 | 77.80% | 13.17<br>842 | Maged1       |
| 114716                          | 2872 | 138 | 82.63% | 13.493<br>68 | 218 | 90.95% | 21.33<br>999 | Spred2       |
| 110379                          | 1301 | 138 | 93.93% | 29.787<br>74 | 131 | 89.85% | 28.30<br>845 | Sec13        |
| 26885                           | 6805 | 138 | 52.89% | 5.6949<br>07 | 95  | 42.97% | 3.924<br>801 | Casp8ap<br>2 |
| 106200                          | 2977 | 138 | 77.63% | 13.017<br>75 | 127 | 74.17% | 11.99<br>353 | Txndc11      |
| gi 54027903 ref N<br>M_032543.1 | 3945 | 138 | 77.95% | 9.8235<br>35 | 106 | 61.14% | 7.554<br>069 | -            |
| 1E+08                           | 2217 | 138 | 5.46%  | 17.480<br>31 | 115 | 3.25%  | 14.58<br>325 | Gm2194       |
| 232947                          | 2971 | 138 | 81.05% | 13.044<br>04 | 106 | 68.43% | 10.03<br>056 | Ppp1r37      |
| 218693                          | 4668 | 138 | 32.20% | 8.3020<br>23 | 124 | 32.90% | 7.468<br>149 | Paip1        |



|                                  |      |     |        |              |     |        |              |              |
|----------------------------------|------|-----|--------|--------------|-----|--------|--------------|--------------|
| 66073                            | 1275 | 138 | 98.67% | 30.395<br>17 | 122 | 95.84% | 26.90<br>121 | Txndc12      |
| 66262                            | 4539 | 138 | 70.43% | 8.5379<br>7  | 102 | 59.37% | 6.317<br>745 | Ing5         |
| 66865                            | 3125 | 138 | 65.25% | 12.401<br>23 | 93  | 63.58% | 8.366<br>716 | Pmpca        |
| 244418                           | 4780 | 138 | 67.78% | 8.1074<br>99 | 130 | 61.28% | 7.646<br>058 | D8Ert8<br>2e |
| 211488                           | 4456 | 138 | 72.96% | 8.6970<br>03 | 97  | 58.89% | 6.119<br>961 | Ado          |
| 20887                            | 1444 | 138 | 82.06% | 26.837<br>84 | 212 | 82.62% | 41.27<br>535 | Sult1a1      |
| gi 133892541 ref N<br>M_021547.2 | 2054 | 138 | 88.07% | 18.867<br>5  | 119 | 77.02% | 16.28<br>803 | -            |
| 74414                            | 1796 | 138 | 93.82% | 21.577<br>86 | 105 | 88.47% | 16.43<br>634 | Polr3c       |
| 57437                            | 2031 | 137 | 50.62% | 18.942<br>9  | 107 | 48.99% | 14.81<br>14  | Golga7       |
| 193796                           | 4610 | 137 | 70.69% | 8.3455<br>57 | 81  | 47.90% | 4.939<br>764 | Kdm4b        |
| 105440                           | 3324 | 137 | 76.96% | 11.574<br>31 | 108 | 64.29% | 9.134<br>502 | Kctd9        |
| 12807                            | 4011 | 137 | 70.41% | 9.5918<br>77 | 99  | 54.05% | 6.939<br>124 | Hps3         |
| 13806                            | 1831 | 137 | 20.97% | 21.012<br>03 | 150 | 20.59% | 23.03<br>165 | Eno1         |
| 56444                            | 4022 | 137 | 44.73% | 9.5656<br>44 | 168 | 49.93% | 11.74<br>328 | Actr10       |
| 55988                            | 2427 | 137 | 86.28% | 15.852<br>09 | 123 | 85.29% | 14.24<br>812 | Snx12        |
| gi 118130526 ref N<br>M_020005.3 | 4309 | 137 | 61.85% | 8.9285<br>26 | 127 | 53.56% | 8.286<br>084 | -            |
| 360216                           | 2127 | 137 | 92.57% | 18.087<br>93 | 120 | 77.67% | 15.86<br>119 | Zranb1       |
| 232816                           | 3544 | 137 | 75.71% | 10.855<br>82 | 110 | 64.79% | 8.726<br>118 | Zfp628       |
| 70646                            | 4597 | 137 | 65.24% | 8.3691<br>58 | 124 | 61.65% | 7.583<br>493 | Naa30        |
| 18536                            | 8398 | 137 | 37.33% | 4.5812<br>12 | 78  | 26.57% | 2.611<br>204 | Pcm1         |
| 22290                            | 5228 | 137 | 63.35% | 7.3590<br>32 | 92  | 48.64% | 4.947<br>37  | Uty          |
| gi 56699428 ref N<br>M_016849.3  | 2041 | 137 | 77.07% | 18.850<br>08 | 122 | 71.39% | 16.80<br>502 | -            |

|                                 |      |     |        |              |     |        |              |               |
|---------------------------------|------|-----|--------|--------------|-----|--------|--------------|---------------|
| 56524                           | 2222 | 137 | 74.30% | 17.314<br>59 | 159 | 76.87% | 20.11<br>755 | Mpp6          |
| 19221                           | 5786 | 137 | 62.65% | 6.6493<br>29 | 141 | 53.63% | 6.851<br>139 | Ptgrn         |
| 109711                          | 3739 | 136 | 74.97% | 10.214<br>55 | 75  | 56.22% | 5.639<br>335 | Actn1         |
| 217109                          | 2613 | 136 | 70.91% | 14.616<br>22 | 113 | 64.68% | 12.15<br>797 | Utp18         |
| 57914                           | 1371 | 136 | 52.08% | 27.857<br>18 | 153 | 51.79% | 31.37<br>445 | Crif2         |
| 21427                           | 1436 | 136 | 87.12% | 26.596<br>24 | 116 | 84.89% | 22.71<br>045 | Vps72         |
| 16582                           | 3431 | 136 | 73.54% | 11.131<br>51 | 151 | 74.67% | 12.37<br>309 | Kifc3         |
| 229731                          | 3383 | 136 | 74.70% | 11.289<br>45 | 151 | 79.81% | 12.54<br>865 | Slc25a24      |
| 17283                           | 2980 | 136 | 82.85% | 12.816<br>17 | 123 | 76.21% | 11.60<br>409 | Men1          |
| 380711                          | 6410 | 136 | 63.90% | 5.9582<br>21 | 91  | 45.04% | 3.991<br>218 | Rap1gap<br>2  |
| 72049                           | 1906 | 136 | 80.48% | 20.037<br>88 | 83  | 69.88% | 12.24<br>27  | Tnfrsf13<br>c |
| gi 32469502 ref N<br>M_181856.1 | 2465 | 136 | 82.11% | 15.493<br>79 | 72  | 62.72% | 8.211<br>787 | -             |
| 103677                          | 5817 | 136 | 66.15% | 6.5656<br>17 | 127 | 53.62% | 6.137<br>998 | Smg6          |
| 21814                           | 6074 | 136 | 56.83% | 6.2878<br>16 | 83  | 36.55% | 3.841<br>717 | Tgfbr3        |
| 246154                          | 3189 | 136 | 80.46% | 11.976<br>23 | 164 | 79.08% | 14.45<br>811 | Vasn          |
| 26383                           | 3586 | 136 | 74.82% | 10.650<br>36 | 117 | 72.09% | 9.172<br>711 | Fto           |
| 18391                           | 1591 | 136 | 85.92% | 24.005<br>15 | 127 | 91.77% | 22.44<br>17  | Sigmar1       |
| 26428                           | 4075 | 136 | 57.23% | 9.3723<br>18 | 114 | 54.90% | 7.865<br>011 | Orc4          |
| 59004                           | 1676 | 136 | 93.02% | 22.787<br>71 | 129 | 92.96% | 21.63<br>903 | Pias4         |
| 76892                           | 4434 | 136 | 59.20% | 8.6134<br>86 | 118 | 56.59% | 7.481<br>84  | Rnft1         |
| 70381                           | 4195 | 136 | 73.90% | 9.1042<br>18 | 67  | 45.70% | 4.490<br>192 | Tecpr1        |
| 58521                           | 2559 | 135 | 61.82% | 14.814<br>92 | 158 | 62.99% | 17.35<br>837 | Eid1          |

|                                 |      |     |        |              |     |        |              |                   |
|---------------------------------|------|-----|--------|--------------|-----|--------|--------------|-------------------|
| 225160                          | 3855 | 135 | 43.37% | 9.8343<br>37 | 129 | 44.82% | 9.407<br>786 | Thoc1             |
| 59015                           | 5684 | 135 | 55.21% | 6.6698<br>4  | 103 | 46.97% | 5.094<br>543 | Nup160            |
| 403187                          | 2260 | 135 | 81.46% | 16.774<br>94 | 173 | 88.41% | 21.52<br>087 | Opa3              |
| 11927                           | 501  | 135 | 95.81% | 75.671<br>4  | 112 | 94.01% | 62.84<br>958 | Atox1             |
| 58248                           | 1889 | 135 | 69.03% | 20.069<br>54 | 86  | 57.70% | 12.79<br>937 | 1700123<br>O20Rik |
| 226591                          | 4395 | 135 | 39.82% | 8.6260<br>23 | 94  | 32.10% | 6.012<br>998 | Tipr1             |
| 14084                           | 4452 | 135 | 48.16% | 8.5155<br>82 | 166 | 52.65% | 10.48<br>275 | Faf1              |
| 69228                           | 3651 | 135 | 72.34% | 10.383<br>83 | 100 | 58.64% | 7.700<br>347 | Zfp746            |
| 227059                          | 5003 | 135 | 64.82% | 7.5777<br>27 | 99  | 59.20% | 5.563<br>227 | Slc39a10          |
| 70078                           | 1811 | 135 | 67.26% | 20.933<br>94 | 135 | 63.28% | 20.95<br>74  | Nol7              |
| 70930                           | 4242 | 135 | 65.06% | 8.9371<br>45 | 92  | 56.20% | 6.097<br>324 | Nol8              |
| gi 22122616 ref N<br>M_146103.1 | 2134 | 135 | 80.65% | 17.765<br>4  | 140 | 85.43% | 18.44<br>403 | -                 |
| 22630                           | 2110 | 135 | 27.25% | 17.967<br>47 | 159 | 30.14% | 21.18<br>541 | Ywhaq             |
| 23808                           | 2427 | 135 | 85.25% | 15.620<br>67 | 108 | 77.92% | 12.51<br>054 | Ash2l             |
| 23877                           | 2672 | 135 | 76.57% | 14.188<br>39 | 174 | 83.57% | 18.30<br>775 | Fiz1              |
| 53380                           | 1456 | 135 | 84.27% | 26.038<br>03 | 109 | 81.80% | 21.04<br>686 | Psm10             |
| 66590                           | 1846 | 135 | 91.77% | 20.537<br>04 | 138 | 95.45% | 21.01<br>694 | Farsa             |
| 68192                           | 2609 | 135 | 84.52% | 14.531       | 116 | 82.52% | 12.49<br>989 | Lepr11            |
| 71997                           | 2232 | 134 | 78.58% | 16.859<br>56 | 145 | 87.50% | 18.26<br>4   | Smg9              |
| 69459                           | 1382 | 134 | 91.68% | 27.229<br>05 | 123 | 87.84% | 25.02<br>184 | Ubl7              |
| 57905                           | 1620 | 134 | 94.88% | 23.228<br>73 | 114 | 95.62% | 19.78<br>39  | Isy1              |
| 107029                          | 2455 | 134 | 82%    | 15.328<br>12 | 88  | 79.63% | 10.07<br>751 | Me2               |

|        |      |     |        |              |     |        |              |                   |
|--------|------|-----|--------|--------------|-----|--------|--------------|-------------------|
| 27374  | 2641 | 134 | 77.24% | 14.248<br>6  | 80  | 63.92% | 8.516<br>158 | Prmt5             |
| 58185  | 3785 | 134 | 73.08% | 9.9420<br>2  | 338 | 88.32% | 25.10<br>573 | Rsad2             |
| 227197 | 2936 | 134 | 79.60% | 12.816<br>94 | 125 | 66.35% | 11.96<br>95  | Ndufs1            |
| 18796  | 5145 | 134 | 62%    | 7.3140<br>03 | 125 | 63.27% | 6.830<br>41  | Plcb2             |
| 22642  | 3415 | 134 | 73.50% | 11.019<br>19 | 119 | 65.33% | 9.796<br>668 | Zbtb17            |
| 225791 | 3321 | 134 | 79.64% | 11.331<br>09 | 113 | 71.18% | 9.566<br>029 | Zadh2             |
| 68183  | 1422 | 134 | 82.84% | 26.463<br>11 | 129 | 88.05% | 25.50<br>423 | Bcas2             |
| 52013  | 3979 | 134 | 64.79% | 9.4572<br>87 | 109 | 61.85% | 7.701<br>489 | D19Erd<br>386e    |
| 268980 | 3965 | 134 | 69.43% | 9.4906<br>8  | 64  | 50.49% | 4.537<br>942 | Strn              |
| 320541 | 6333 | 134 | 56.62% | 5.9419<br>78 | 93  | 39.43% | 4.128<br>531 | Slc35e2           |
| 56323  | 2327 | 134 | 86.16% | 16.171<br>27 | 118 | 86.03% | 14.25<br>633 | Dnajb5            |
| 319944 | 5033 | 134 | 61.02% | 7.4767<br>62 | 94  | 49.27% | 5.250<br>771 | Taf2              |
| 18824  | 870  | 134 | 79.43% | 43.253<br>5  | 112 | 82.30% | 36.19<br>269 | Plp2              |
| 497652 | 1425 | 134 | 94.67% | 26.407<br>4  | 145 | 94.81% | 28.60<br>719 | Acd               |
| 103284 | 2102 | 134 | 87.49% | 17.902<br>26 | 110 | 76.88% | 14.71<br>235 | Zc3h10            |
| 216821 | 1511 | 134 | 74.12% | 24.904<br>4  | 135 | 63.27% | 25.11<br>837 | Tmem11            |
| 67392  | 2637 | 134 | 75.39% | 14.270<br>21 | 87  | 63.06% | 9.275<br>37  | 4833420<br>G17Rik |
| 23922  | 1103 | 133 | 97.19% | 33.861<br>94 | 161 | 88.49% | 41.03<br>67  | Jtb               |
| 56724  | 1171 | 133 | 96.93% | 31.895<br>58 | 122 | 96.24% | 29.29<br>038 | Cript             |
| 13595  | 1755 | 133 | 60.40% | 21.281<br>89 | 126 | 60.11% | 20.18<br>439 | Ebp               |
| 218271 | 1636 | 133 | 90.10% | 22.829<br>9  | 122 | 86.61% | 20.96<br>518 | B4galt7           |
| 17992  | 492  | 133 | 87.80% | 75.914<br>07 | 166 | 96.75% | 94.85<br>606 | Ndufa4            |

|                                 |      |     |        |              |     |        |              |             |
|---------------------------------|------|-----|--------|--------------|-----|--------|--------------|-------------|
| 11305                           | 8061 | 133 | 47.92% | 4.6333<br>85 | 101 | 36.98% | 3.522<br>529 | Abca2       |
| 27275                           | 3974 | 133 | 39.13% | 9.3985<br>2  | 121 | 39.28% | 8.560<br>116 | Nufip1      |
| 100763                          | 5033 | 133 | 65.85% | 7.4209<br>66 | 94  | 51.36% | 5.250<br>771 | Ube3c       |
| 66177                           | 1939 | 133 | 50.70% | 19.262<br>36 | 131 | 40.54% | 18.99<br>396 | Ubl5        |
| 54451                           | 2560 | 133 | 78.44% | 14.589<br>73 | 101 | 69.61% | 11.09<br>184 | Cpsf3       |
| gi 31543484 ref N<br>M_053187.2 | 4238 | 133 | 73.29% | 8.8130<br>53 | 88  | 58.19% | 5.837<br>728 | -           |
| 18673                           | 1815 | 133 | 83.91% | 20.578<br>36 | 131 | 90.91% | 20.29<br>162 | Phb         |
| 102122                          | 1812 | 133 | 84.55% | 20.612<br>43 | 144 | 88.25% | 22.34<br>222 | Fam192a     |
| 225348                          | 3281 | 133 | 74.70% | 11.383<br>64 | 105 | 64.74% | 8.997<br>155 | Wdr36       |
| 209200                          | 5181 | 133 | 62.46% | 7.2089<br>79 | 90  | 48.79% | 4.883<br>723 | Dtx31       |
| 83945                           | 2666 | 133 | 75.47% | 14.009<br>65 | 84  | 69.35% | 8.858<br>114 | Dnaja3      |
| 66724                           | 6381 | 133 | 54.51% | 5.8532<br>71 | 91  | 40.86% | 4.009<br>357 | Tab3        |
| 16332                           | 5012 | 132 | 67.54% | 7.3960<br>29 | 63  | 38.59% | 3.533<br>878 | Inpp1       |
| 77975                           | 2237 | 132 | 86.90% | 16.570<br>81 | 93  | 78.27% | 11.68<br>797 | Tmem50<br>b |
| 14245                           | 5626 | 132 | 62.60% | 6.5888<br>54 | 69  | 39.03% | 3.448<br>034 | Lpin1       |
| 14630                           | 1470 | 132 | 79.25% | 25.216<br>94 | 119 | 72.93% | 22.75<br>892 | Gclm        |
| 52538                           | 1500 | 132 | 92.60% | 24.712<br>6  | 117 | 92.53% | 21.92<br>889 | Acaa2       |
| 72020                           | 4835 | 132 | 64.86% | 7.6667<br>83 | 80  | 49.31% | 4.651<br>742 | Zfp654      |
| 668501                          | 6702 | 132 | 52.91% | 5.5310<br>2  | 77  | 38.41% | 3.230<br>044 | Zfp507      |
| 73251                           | 7356 | 132 | 45.89% | 5.0392<br>73 | 79  | 32.56% | 3.019<br>308 | Setd7       |
| 16151                           | 6918 | 132 | 53.95% | 5.3583<br>25 | 93  | 42.05% | 3.779<br>414 | Ikbkg       |
| 77626                           | 4632 | 132 | 70.44% | 8.0027<br>84 | 87  | 55.25% | 5.280<br>473 | Smpd4       |

|        |      |     |        |              |     |        |              |             |
|--------|------|-----|--------|--------------|-----|--------|--------------|-------------|
| 19378  | 2264 | 132 | 81.67% | 16.373<br>19 | 258 | 92.84% | 32.03<br>8   | Aldh1a2     |
| 81014  | 2683 | 132 | 20.83% | 13.816<br>21 | 173 | 24.49% | 18.12<br>79  | Vmn1r5<br>8 |
| 116940 | 4389 | 132 | 68.95% | 8.4458<br>64 | 120 | 62.25% | 7.686<br>662 | Tgs1        |
| 101490 | 4740 | 132 | 63.23% | 7.8204<br>42 | 102 | 46.96% | 6.049<br>841 | Inpp5f      |
| 74734  | 4960 | 132 | 47.62% | 7.4735<br>68 | 100 | 41.92% | 5.668<br>138 | Rhoh        |
| 234852 | 2188 | 132 | 79.11% | 16.941<br>91 | 111 | 74.41% | 14.26<br>257 | Chmp1a      |
| 68842  | 9714 | 132 | 16.10% | 3.8160<br>28 | 88  | 14.14% | 2.546<br>869 | Tulp4       |
| 381308 | 1651 | 132 | 20.35% | 22.452<br>39 | 314 | 24.29% | 53.46<br>932 | Mnda        |
| 22230  | 1996 | 132 | 90.73% | 18.571<br>59 | 136 | 89.83% | 19.15<br>581 | Ufd11       |
| 140484 | 7121 | 132 | 45.47% | 5.2055<br>74 | 121 | 44.75% | 4.777<br>124 | Pofut1      |
| 50793  | 6313 | 132 | 50.45% | 5.8718<br>35 | 85  | 36.05% | 3.785<br>343 | Orc3        |
| 26466  | 3851 | 132 | 72.42% | 9.6257<br>84 | 71  | 51.16% | 5.183<br>307 | Zfp260      |
| 269338 | 4432 | 132 | 66.02% | 8.3639<br>2  | 100 | 56.84% | 6.343<br>404 | Vps39       |
| 433771 | 2624 | 132 | 53.39% | 14.126<br>87 | 154 | 40.24% | 16.49<br>981 | Minos1      |
| 21950  | 1230 | 131 | 91.14% | 29.909       | 726 | 90.73% | 165.9<br>41  | Tnfsf9      |
| 245867 | 3542 | 131 | 76.17% | 10.386<br>24 | 63  | 47.26% | 5.000<br>508 | Pcmt2       |
| 70296  | 3487 | 131 | 80.27% | 10.550<br>06 | 110 | 70.17% | 8.868<br>759 | Tbc1d13     |
| 214585 | 7665 | 131 | 47.92% | 4.7994<br>87 | 72  | 30.11% | 2.640<br>842 | Spg11       |
| 67680  | 1091 | 131 | 73.60% | 33.719<br>59 | 142 | 73.60% | 36.59<br>196 | Sdhb        |
| 18541  | 9530 | 131 | 36.86% | 3.8602<br>38 | 97  | 28.50% | 2.861<br>547 | Pcnt        |
| 16834  | 3060 | 131 | 66.76% | 12.022<br>25 | 100 | 64.77% | 9.187<br>571 | Cog1        |
| 11428  | 4319 | 131 | 58.18% | 8.5177<br>29 | 129 | 60.48% | 8.397<br>086 | Aco1        |

|                              |      |     |        |              |     |        |              |              |
|------------------------------|------|-----|--------|--------------|-----|--------|--------------|--------------|
| 213452                       | 6385 | 131 | 53.22% | 5.7616<br>4  | 82  | 41.41% | 3.610<br>564 | Dstyk        |
| 72129                        | 4122 | 131 | 51.82% | 8.9248<br>11 | 123 | 51.50% | 8.389<br>175 | Pex13        |
| 66771                        | 4437 | 131 | 68.51% | 8.2912<br>04 | 97  | 54.41% | 6.146<br>168 | Gid4         |
| 19356                        | 2856 | 131 | 72.48% | 12.880<br>98 | 115 | 67.65% | 11.32<br>04  | Rad17        |
| 211446                       | 4597 | 131 | 67.44% | 8.0026<br>26 | 108 | 58.15% | 6.604<br>978 | Exoc3        |
| 230484                       | 3567 | 131 | 58.73% | 10.313<br>45 | 96  | 52.65% | 7.566<br>416 | Usp1         |
| 242362                       | 4645 | 131 | 63.23% | 7.9199<br>29 | 89  | 44.50% | 5.386<br>745 | Manea        |
| 21372                        | 2302 | 131 | 91.14% | 15.980<br>92 | 94  | 75.98% | 11.48<br>007 | Tbl1x        |
| 225115                       | 7424 | 130 | 51.58% | 4.9174<br>63 | 113 | 44.79% | 4.279<br>2   | Svil         |
| 74330                        | 4229 | 130 | 51.34% | 8.6325<br>95 | 93  | 42.04% | 6.182<br>546 | Dnajc14      |
| 101602                       | 1918 | 130 | 86.55% | 19.034<br>02 | 32  | 50.99% | 4.690<br>547 | AI46760<br>6 |
| 78514                        | 3038 | 130 | 75.87% | 12.016<br>87 | 138 | 77.06% | 12.77<br>066 | Arhgap1<br>0 |
| 23989                        | 3427 | 130 | 74.91% | 10.652<br>83 | 137 | 68.28% | 11.23<br>902 | Med24        |
| 216971                       | 3884 | 130 | 76.36% | 9.3993<br>94 | 93  | 66.61% | 6.731<br>717 | BC0176<br>47 |
| 64144                        | 3627 | 130 | 69.29% | 10.065<br>41 | 101 | 64.24% | 7.828<br>813 | Mllt1        |
| 217864                       | 2725 | 130 | 83.12% | 13.397<br>15 | 56  | 57.69% | 5.777<br>549 | Rcor1        |
| 12572                        | 7612 | 130 | 31.78% | 4.7960<br>12 | 88  | 24.24% | 3.250<br>169 | Cdk7         |
| 66905                        | 2159 | 130 | 77.17% | 16.909<br>33 | 113 | 77.12% | 14.71<br>458 | Plin3        |
| 73447                        | 4248 | 130 | 61.72% | 8.5939<br>84 | 104 | 59.89% | 6.882<br>892 | Wdr13        |
| 20084                        | 524  | 130 | 18.32% | 69.670<br>32 | 135 | 17.94% | 72.43<br>102 | Rps18        |
| gi 158508720 ref NM_007915.4 | 2108 | 130 | 87.05% | 17.318<br>43 | 97  | 88.38% | 12.93<br>669 | -            |
| 67116                        | 1941 | 130 | 49.56% | 18.808<br>47 | 135 | 53.99% | 19.55<br>376 | Cuedc2       |

|                                  |       |     |        |              |     |        |              |                   |
|----------------------------------|-------|-----|--------|--------------|-----|--------|--------------|-------------------|
| 66445                            | 1194  | 130 | 90.03% | 30.575<br>58 | 120 | 91.29% | 28.25<br>524 | Cycl              |
| 66074                            | 10809 | 130 | 30.54% | 3.3774<br>86 | 129 | 28.74% | 3.355<br>261 | Tmem16<br>7       |
| 66420                            | 1022  | 129 | 95.60% | 35.446<br>6  | 115 | 96.28% | 31.63<br>509 | Polr2e            |
| 26371                            | 3075  | 129 | 69.01% | 11.780<br>95 | 110 | 58.50% | 10.05<br>703 | Ciao1             |
| 668661                           | 2001  | 129 | 64.62% | 18.104<br>16 | 107 | 61.42% | 15.03<br>346 | 2410002<br>F23Rik |
| gi 30519990 ref N<br>M_178637.1  | 1542  | 129 | 89.49% | 23.493<br>14 | 113 | 84.31% | 20.60<br>232 | -                 |
| 16590                            | 5205  | 129 | 60.67% | 6.9599<br>27 | 13  | 12.05% | 0.702<br>174 | Kit               |
| 227656                           | 2354  | 129 | 84.28% | 15.389<br>3  | 96  | 79.69% | 11.46<br>534 | Rexo4             |
| gi 27229172 ref N<br>M_028751.2  | 2557  | 129 | 82.40% | 14.167<br>55 | 95  | 75.64% | 10.44<br>516 | -                 |
| gi 146134896 ref N<br>M_025338.3 | 793   | 129 | 92.81% | 45.682<br>75 | 133 | 97.10% | 47.15<br>205 | -                 |
| 214897                           | 7183  | 129 | 56.88% | 5.0433<br>55 | 83  | 41.46% | 3.248<br>586 | Csnk1g1           |
| 30934                            | 2997  | 129 | 82.72% | 12.087<br>56 | 113 | 75.51% | 10.60<br>019 | Tor1b             |
| 12709                            | 1478  | 129 | 82.61% | 24.510<br>43 | 152 | 86.74% | 28.91<br>287 | Ckb               |
| 63856                            | 2779  | 129 | 76.54% | 13.035<br>78 | 73  | 59.91% | 7.385<br>101 | Taf8              |
| 652925                           | 988   | 129 | 81.88% | 36.666<br>42 | 150 | 82.59% | 42.68<br>315 | 4930420<br>K17Rik |
| gi 142363119 ref N<br>M_026182.4 | 2807  | 129 | 77.63% | 12.905<br>74 | 119 | 76.81% | 11.91<br>864 | -                 |
| 21934                            | 5022  | 128 | 62.05% | 7.1576<br>25 | 86  | 47.27% | 4.814<br>419 | Tnfrsf11<br>a     |
| 68836                            | 412   | 128 | 93.45% | 87.246<br>59 | 152 | 97.33% | 103.7<br>214 | Mrpl52            |
| 76688                            | 2596  | 128 | 64.48% | 13.846<br>53 | 114 | 62.06% | 12.34<br>589 | Arfrp1            |
| 224092                           | 2373  | 128 | 79.98% | 15.147<br>74 | 152 | 85.63% | 18.00<br>81  | Lsg1              |
| 67973                            | 2202  | 128 | 88.65% | 16.324<br>07 | 107 | 77.57% | 13.66<br>119 | Mphosph<br>10     |
| 215335                           | 5280  | 128 | 65.45% | 6.8078<br>78 | 118 | 59.24% | 6.283<br>045 | Slc36a1           |



|        |       |     |        |              |     |        |              |                   |
|--------|-------|-----|--------|--------------|-----|--------|--------------|-------------------|
| 78523  | 1601  | 128 | 88.51% | 22.451<br>96 | 137 | 91.44% | 24.05<br>755 | Mrpl9             |
| 77116  | 3141  | 128 | 70.90% | 11.444       | 121 | 73.23% | 10.83<br>028 | Mtmr2             |
| 80795  | 1018  | 128 | 81.14% | 35.310<br>01 | 165 | 87.43% | 45.56<br>782 | Selk              |
| 15183  | 2005  | 128 | 88.68% | 17.927<br>98 | 86  | 70.12% | 12.05<br>886 | Hdac3             |
| 74370  | 6956  | 128 | 53.57% | 5.1675<br>67 | 87  | 41.29% | 3.516<br>267 | Rptor             |
| 17192  | 1589  | 128 | 83.83% | 22.621<br>52 | 108 | 68.60% | 19.10<br>83  | Mbd3              |
| 72098  | 2605  | 128 | 72.25% | 13.798<br>69 | 107 | 68.75% | 11.54<br>777 | Tmem68            |
| 67602  | 2393  | 128 | 88.13% | 15.021<br>14 | 78  | 64.27% | 9.163<br>767 | Necap1            |
| 52696  | 2676  | 128 | 69.99% | 13.432<br>58 | 112 | 81.84% | 11.76<br>668 | Zwint             |
| 229782 | 4027  | 128 | 72.51% | 8.9261<br>47 | 59  | 50.56% | 4.119<br>007 | Slc35a3           |
| 382038 | 5773  | 128 | 62.48% | 6.2265<br>02 | 90  | 51.22% | 4.382<br>915 | Urb2              |
| 100317 | 4384  | 128 | 71.01% | 8.1992<br>69 | 108 | 57.09% | 6.925<br>886 | AU0403<br>20      |
| 19079  | 2051  | 128 | 86.98% | 17.525<br>89 | 111 | 84.01% | 15.21<br>526 | Prkab1            |
| 68832  | 2757  | 128 | 83.82% | 13.037<br>94 | 100 | 79.36% | 10.19<br>73  | 1110057<br>K04Rik |
| 67220  | 1370  | 128 | 91.17% | 26.237<br>66 | 93  | 81.46% | 19.08<br>466 | Plekho1           |
| 108909 | 3293  | 128 | 59.70% | 10.915<br>76 | 105 | 52.51% | 8.964<br>368 | Aida              |
| 66877  | 3111  | 127 | 67.44% | 11.464<br>09 | 98  | 55.51% | 8.856<br>216 | Crnk11            |
| 14218  | 10464 | 127 | 35.81% | 3.4083<br>3  | 73  | 22.04% | 1.961<br>315 | Sh3pxd2<br>a      |
| 56274  | 2928  | 127 | 73.29% | 12.180<br>59 | 135 | 73.67% | 12.96<br>238 | Stk3              |
| 229593 | 2846  | 127 | 82.71% | 12.531<br>54 | 78  | 71.89% | 7.705<br>163 | Golph31           |
| 14300  | 1106  | 127 | 91.50% | 32.246<br>63 | 110 | 88.52% | 27.96<br>145 | Frg1              |
| 26572  | 1583  | 127 | 90.08% | 22.529<br>86 | 131 | 91.41% | 23.26<br>551 | Cops3             |

|        |      |     |        |              |     |        |              |                   |
|--------|------|-----|--------|--------------|-----|--------|--------------|-------------------|
| 68770  | 4839 | 127 | 64.35% | 7.3702<br>77 | 106 | 54.43% | 6.158<br>463 | Phtf2             |
| 20348  | 4956 | 127 | 55.13% | 7.1962<br>81 | 105 | 55.31% | 5.956<br>349 | Sema3c            |
| 71949  | 2050 | 127 | 87.22% | 17.397<br>45 | 121 | 81.61% | 16.59<br>41  | Lass5             |
| 11881  | 3989 | 127 | 68.64% | 8.9407<br>8  | 140 | 70.89% | 9.867<br>022 | Arsb              |
| 104799 | 2552 | 127 | 83.62% | 13.975<br>22 | 97  | 80.92% | 10.68<br>595 | Vipas39           |
| 70208  | 4946 | 127 | 62.45% | 7.2108<br>31 | 59  | 39.83% | 3.353<br>668 | Med23             |
| 107652 | 2283 | 127 | 35.30% | 15.621<br>89 | 190 | 35.30% | 23.39<br>752 | Uap1              |
| 67530  | 503  | 127 | 67.20% | 70.904<br>12 | 190 | 69.78% | 106.1<br>959 | Uqcrb             |
| 53890  | 3586 | 127 | 72.62% | 9.9455<br>58 | 106 | 68.77% | 8.310<br>319 | Sart3             |
| 68097  | 2476 | 127 | 79.73% | 14.404<br>19 | 136 | 85.22% | 15.44<br>224 | Dynll2            |
| 100434 | 3102 | 127 | 61.77% | 11.497<br>35 | 79  | 55.35% | 7.159<br>908 | Slc44a1           |
| 227634 | 7978 | 127 | 45.45% | 4.4703<br>9  | 106 | 38.69% | 3.735<br>373 | Camsap1           |
| 66356  | 5397 | 127 | 61.92% | 6.6082<br>58 | 113 | 58.22% | 5.886<br>378 | 2310008<br>H09Rik |
| 13007  | 1770 | 127 | 85.99% | 20.149<br>59 | 79  | 80.68% | 12.54<br>804 | Csrp1             |
| 72162  | 4975 | 127 | 59.98% | 7.1687<br>98 | 116 | 50.63% | 6.555<br>216 | Dhx36             |
| 319719 | 4811 | 127 | 58.80% | 7.4131<br>72 | 132 | 59.24% | 7.713<br>664 | 4732471<br>D19Rik |
| 19047  | 2379 | 127 | 41.11% | 14.991<br>5  | 123 | 39.30% | 14.53<br>559 | Ppp1cc            |
| 227446 | 5424 | 127 | 62.96% | 6.5753<br>63 | 90  | 47.79% | 4.664<br>928 | 2310035<br>C23Rik |
| 15932  | 3391 | 126 | 71.16% | 10.434<br>66 | 114 | 65.97% | 9.451<br>466 | Idua              |
| 16328  | 7979 | 126 | 43.80% | 4.4346<br>34 | 98  | 35.68% | 3.453<br>025 | Cep250            |
| 320714 | 4338 | 126 | 72.41% | 8.1567<br>42 | 93  | 57.08% | 6.027<br>199 | D030016<br>E14Rik |
| 68219  | 1111 | 126 | 89.11% | 31.848<br>74 | 93  | 80.92% | 23.53<br>374 | Nudt21            |

|        |      |     |        |              |     |        |              |         |
|--------|------|-----|--------|--------------|-----|--------|--------------|---------|
| 57320  | 920  | 126 | 88.70% | 38.460<br>81 | 174 | 88.48% | 53.17<br>207 | Park7   |
| 20336  | 3723 | 126 | 71.66% | 9.5041<br>49 | 78  | 62.37% | 5.890<br>114 | Exoc4   |
| 66191  | 1404 | 126 | 84.47% | 25.202<br>24 | 135 | 86.97% | 27.03<br>266 | Ier3ip1 |
| 17196  | 4820 | 126 | 64.94% | 7.3410<br>67 | 76  | 42.68% | 4.432<br>908 | Mbp     |
| 67111  | 2424 | 126 | 83.58% | 14.597<br>34 | 99  | 76.11% | 11.48<br>219 | Naaa    |
| 56809  | 6581 | 126 | 50.36% | 5.3766<br>82 | 107 | 43.29% | 4.571<br>029 | Gmeb1   |
| 240168 | 4728 | 126 | 65.78% | 7.4839<br>14 | 106 | 61.23% | 6.303<br>047 | Rasgrp3 |
| 233046 | 4636 | 126 | 55.93% | 7.6324<br>3  | 118 | 56.77% | 7.155<br>841 | Rasgrp4 |
| 12870  | 4564 | 126 | 54.86% | 7.7528<br>36 | 230 | 67.16% | 14.16<br>786 | Cp      |
| 16897  | 4425 | 126 | 70.51% | 7.9963<br>72 | 75  | 48.32% | 4.765<br>079 | Llgl1   |
| 68295  | 3590 | 126 | 63.09% | 9.8562<br>52 | 109 | 61.67% | 8.535<br>995 | Aar2    |
| 66587  | 1840 | 126 | 91.74% | 19.230<br>41 | 95  | 85.11% | 14.51<br>536 | Fastk   |
| 232944 | 2259 | 126 | 87.21% | 15.663<br>54 | 87  | 82.65% | 10.82<br>742 | Mark4   |
| 106840 | 3643 | 126 | 78.56% | 9.7128<br>59 | 124 | 68.98% | 9.569<br>398 | Unc119b |
| 26569  | 4008 | 126 | 72.93% | 8.8283<br>3  | 114 | 64.37% | 7.996<br>487 | Slc27a4 |
| 59022  | 678  | 126 | 85.69% | 52.188<br>71 | 144 | 89.38% | 59.71<br>108 | Edf1    |
| 414801 | 3781 | 126 | 71.41% | 9.3583<br>56 | 105 | 70.38% | 7.807<br>37  | Itrip1  |
| 28018  | 4831 | 125 | 60.46% | 7.2662<br>22 | 89  | 52.78% | 5.179<br>348 | Ubfd1   |
| 19171  | 1270 | 125 | 83.78% | 27.640<br>25 | 118 | 75.91% | 26.12<br>164 | Psmbl0  |
| 211660 | 4378 | 125 | 66.33% | 8.0180<br>72 | 101 | 55.30% | 6.485<br>862 | Cspp1   |
| 18613  | 3305 | 125 | 72.34% | 10.621<br>22 | 51  | 43.33% | 4.338<br>312 | Pecam1  |
| 231805 | 2588 | 125 | 46.29% | 13.563<br>8  | 192 | 50.12% | 20.85<br>735 | Pilra   |

|        |       |     |        |              |     |        |              |                |
|--------|-------|-----|--------|--------------|-----|--------|--------------|----------------|
| 52846  | 3205  | 125 | 76.01% | 10.952<br>61 | 104 | 69.14% | 9.122<br>785 | D1Bwg0<br>212e |
| 13435  | 9735  | 125 | 43.05% | 3.6058<br>68 | 66  | 24.92% | 1.906<br>032 | Dnmt3a         |
| 103213 | 2867  | 125 | 66.90% | 12.243<br>85 | 109 | 63.97% | 10.68<br>86  | Traf3ip2       |
| 11306  | 5759  | 125 | 60.79% | 6.0953<br>5  | 125 | 52.80% | 6.102<br>181 | Abcb7          |
| 252903 | 2892  | 125 | 44.81% | 12.138<br>01 | 112 | 33.37% | 10.88<br>784 | Ap1s3          |
| 15531  | 6088  | 125 | 59.54% | 5.7659<br>53 | 82  | 43.50% | 3.786<br>704 | Ndst1          |
| 67955  | 1951  | 125 | 66.22% | 17.992<br>37 | 123 | 72.63% | 17.72<br>434 | Sugt1          |
| 20250  | 5453  | 125 | 60.81% | 6.4373<br>96 | 44  | 24.94% | 2.268<br>503 | Scd2           |
| 23825  | 763   | 125 | 84.01% | 46.006<br>71 | 116 | 82.57% | 42.74<br>207 | Banf1          |
| 170750 | 2424  | 125 | 86.88% | 14.481<br>49 | 103 | 82.01% | 11.94<br>612 | Xpnpep1        |
| 56516  | 5390  | 125 | 49.78% | 6.5126<br>38 | 100 | 54.92% | 5.215<br>949 | Rbms2          |
| 225887 | 963   | 125 | 92.83% | 36.451<br>84 | 110 | 77.88% | 32.11<br>356 | Ndufs8         |
| 72590  | 2361  | 125 | 84.16% | 14.867<br>9  | 118 | 87.42% | 14.05<br>103 | Ppme1          |
| 53612  | 1296  | 125 | 72.38% | 27.085<br>74 | 122 | 70.37% | 26.46<br>531 | Vti1b          |
| 72826  | 3672  | 125 | 67.76% | 9.5596<br>73 | 89  | 63.45% | 6.814<br>115 | Fam76b         |
| 270685 | 3743  | 125 | 55.25% | 9.3783<br>38 | 89  | 39.49% | 6.684<br>86  | Mthfd11        |
| 52004  | 911   | 124 | 96.27% | 38.224<br>25 | 119 | 92.97% | 36.72<br>406 | Cdk2ap2        |
| 234353 | 11334 | 124 | 37.44% | 3.0723<br>75 | 101 | 34.07% | 2.505<br>303 | Psd3           |
| 56395  | 2177  | 124 | 86.63% | 15.995<br>54 | 127 | 79.65% | 16.40<br>089 | Tmem11<br>5    |
| 21750  | 2664  | 124 | 67.64% | 13.071<br>43 | 88  | 68.09% | 9.286<br>896 | Terf2          |
| 233204 | 2601  | 124 | 74.01% | 13.388<br>04 | 83  | 61.78% | 8.971<br>393 | Tbc1d17        |
| 101502 | 1823  | 124 | 88.10% | 19.101<br>64 | 122 | 86.34% | 18.81<br>461 | Hsd3b7         |

|                                  |      |     |        |              |     |        |              |         |
|----------------------------------|------|-----|--------|--------------|-----|--------|--------------|---------|
| 101869                           | 3285 | 124 | 74.43% | 10.600<br>39 | 112 | 67.70% | 9.585<br>279 | Unc45a  |
| 69597                            | 3086 | 124 | 60.34% | 11.283<br>96 | 119 | 64.94% | 10.84<br>11  | Afg3l2  |
| 215194                           | 2625 | 124 | 59.50% | 13.265<br>64 | 99  | 58.32% | 10.60<br>298 | Kri1    |
| 75687                            | 4152 | 124 | 64.52% | 8.3868<br>73 | 99  | 60.93% | 6.703<br>475 | Fam65a  |
| 225898                           | 3194 | 124 | 78.55% | 10.902<br>41 | 101 | 63.49% | 8.890<br>14  | Eml3    |
| 98952                            | 4217 | 124 | 66.26% | 8.2575<br>99 | 60  | 42.30% | 4.000<br>09  | Fam102a |
| 230761                           | 2882 | 124 | 74.57% | 12.082<br>68 | 91  | 66.79% | 8.877<br>068 | Zfp362  |
| 14755                            | 3084 | 124 | 74.12% | 11.291<br>28 | 91  | 70.43% | 8.295<br>626 | Pigq    |
| gi 149259581 ref X<br>R_034093.1 | 6247 | 124 | 35.43% | 5.5742<br>43 | 152 | 40.28% | 6.840<br>6   | -       |
| 28084                            | 1112 | 124 | 80.40% | 31.315<br>01 | 154 | 80.13% | 38.93<br>481 | Vps25   |
| 15270                            | 1414 | 124 | 82.60% | 24.626<br>8  | 132 | 86.78% | 26.24<br>5   | H2afx   |
| 242291                           | 4636 | 124 | 58.93% | 7.5112<br>8  | 102 | 56.60% | 6.185<br>558 | Impad1  |
| 13185                            | 2419 | 124 | 73.71% | 14.395<br>33 | 118 | 77.97% | 13.71<br>413 | Dscr3   |
| 23912                            | 2143 | 124 | 82.50% | 16.249<br>32 | 75  | 71.54% | 9.839<br>232 | Rhof    |
| 26611                            | 2042 | 124 | 62.78% | 17.053<br>03 | 114 | 72.92% | 15.69<br>536 | Rcn2    |
| 11632                            | 1347 | 124 | 88.86% | 25.851<br>74 | 127 | 88.12% | 26.50<br>686 | Aip     |
| 12048                            | 2371 | 124 | 83.30% | 14.686<br>75 | 114 | 84.23% | 13.51<br>747 | Bcl2l1  |
| 380713                           | 2884 | 123 | 78.61% | 11.976<br>93 | 60  | 63.45% | 5.848<br>953 | Scarf1  |
| 26894                            | 1775 | 123 | 86.03% | 19.459<br>98 | 68  | 69.58% | 10.77<br>042 | Cops7a  |
| 246196                           | 2454 | 123 | 62.55% | 14.075<br>58 | 99  | 54.52% | 11.34<br>182 | Zfp277  |
| 76952                            | 4181 | 123 | 52.28% | 8.2615<br>33 | 96  | 47.67% | 6.455<br>252 | Nt5c2   |
| 107869                           | 1815 | 123 | 79.39% | 19.031<br>11 | 134 | 89.86% | 20.75<br>632 | Cth     |

|                                     |      |     |        |              |     |        |              |              |
|-------------------------------------|------|-----|--------|--------------|-----|--------|--------------|--------------|
| 407819                              | 1082 | 123 | 89.19% | 31.923<br>72 | 129 | 88.08% | 33.51<br>85  | BC0311<br>81 |
| 230082                              | 4522 | 123 | 71.45% | 7.6385<br>38 | 114 | 66.52% | 7.087<br>554 | Nol6         |
| 66190                               | 4058 | 123 | 58.06% | 8.5119<br>44 | 156 | 67.62% | 10.80<br>773 | Acer3        |
| 72323                               | 2129 | 123 | 86.33% | 16.224<br>27 | 104 | 85.49% | 13.73<br>345 | Asb6         |
| 15944                               | 2227 | 123 | 83.74% | 15.510<br>31 | 135 | 79.12% | 17.04<br>259 | Irgm1        |
| 67832                               | 2654 | 123 | 63.56% | 13.014<br>87 | 128 | 56.52% | 13.55<br>911 | Brix1        |
| 432940                              | 1491 | 123 | 79.34% | 23.166<br>65 | 73  | 82.29% | 13.76<br>472 | Fam105b      |
| 74326                               | 2725 | 123 | 67.82% | 12.675<br>77 | 95  | 54.09% | 9.801<br>199 | Hrnpr        |
| 83410                               | 3764 | 123 | 66.66% | 9.1767<br>99 | 78  | 50.98% | 5.825<br>955 | Cstf2t       |
| 67542                               | 2920 | 123 | 84.97% | 11.829<br>27 | 87  | 66.23% | 8.376<br>421 | Cog6         |
| 240087                              | 7372 | 123 | 48.35% | 4.6854<br>95 | 47  | 25.20% | 1.792<br>399 | Mdc1         |
| 27367                               | 1361 | 123 | 10.65% | 25.379<br>48 | 111 | 11.54% | 22.92<br>91  | Rpl3         |
| 102334                              | 2598 | 123 | 46.23% | 13.295<br>41 | 56  | 21.05% | 6.059<br>977 | Ankrd10      |
| 19895                               | 1789 | 123 | 75.35% | 19.307<br>7  | 88  | 72.05% | 13.82<br>912 | Rpia         |
| gi 149273797 ref X<br>M_001477167.1 | 2530 | 123 | 16.92% | 13.652<br>76 | 106 | 19.01% | 11.77<br>897 | -            |
| 68614                               | 2579 | 123 | 80.92% | 13.393<br>36 | 79  | 73.83% | 8.611<br>878 | Letmd1       |
| 209225                              | 4584 | 123 | 64.90% | 7.5352<br>25 | 99  | 58.31% | 6.071<br>734 | Zfp710       |
| 70661                               | 6296 | 123 | 15.06% | 5.4862<br>56 | 111 | 16.22% | 4.956<br>56  | Sik3         |
| 52685                               | 2732 | 123 | 82.98% | 12.643<br>29 | 135 | 85.69% | 13.89<br>233 | Cd300lg      |
| 213002                              | 541  | 123 | 97.60% | 63.847<br>45 | 157 | 99.26% | 81.58<br>767 | Ifitm6       |
| 94091                               | 2266 | 123 | 79.17% | 15.243<br>37 | 81  | 69.46% | 10.04<br>956 | Trim11       |
| 16909                               | 1646 | 123 | 71.57% | 20.985<br>1  | 109 | 76.73% | 18.61<br>739 | Lmo2         |

|                              |      |     |        |              |     |        |              |                   |
|------------------------------|------|-----|--------|--------------|-----|--------|--------------|-------------------|
| 266690                       | 2653 | 123 | 58.61% | 13.019<br>78 | 102 | 55.41% | 10.80<br>899 | Cyb5r4            |
| 55982                        | 5073 | 122 | 53.26% | 6.7535<br>28 | 94  | 42.05% | 5.209<br>369 | Paxip1            |
| 18769                        | 1148 | 122 | 86.50% | 29.843<br>77 | 78  | 77.61% | 19.10<br>182 | Pkig              |
| 76959                        | 1372 | 122 | 92.49% | 24.971<br>32 | 110 | 86.59% | 22.54<br>035 | Chmp5             |
| 57247                        | 4877 | 122 | 56.47% | 7.0249<br>43 | 62  | 39.10% | 3.574<br>054 | Zfp276            |
| 18554                        | 3834 | 122 | 60.41% | 8.9360<br>06 | 87  | 59.65% | 6.379<br>538 | Pcsk7             |
| 74192                        | 1271 | 122 | 89.69% | 26.955<br>66 | 92  | 81.51% | 20.35        | Arpc5l            |
| 67210                        | 2547 | 122 | 64.74% | 13.451<br>37 | 152 | 65.49% | 16.77<br>787 | Gatad1            |
| 67143                        | 4440 | 122 | 65.65% | 7.7163<br>62 | 114 | 61.87% | 7.218<br>451 | Ikzf5             |
| 59126                        | 3175 | 122 | 73.17% | 10.790<br>75 | 105 | 69.48% | 9.297<br>532 | Nek6              |
| 56532                        | 1980 | 122 | 81.41% | 17.303<br>36 | 143 | 90.61% | 20.30<br>453 | Ripk3             |
| 231380                       | 5101 | 122 | 59.52% | 6.7164<br>57 | 75  | 43.93% | 4.133<br>596 | Uba6              |
| gi 146149178 ref NM_134079.3 | 1701 | 122 | 89.30% | 20.141<br>47 | 123 | 87.54% | 20.32<br>932 | -                 |
| gi 19111155 ref NM_133347.1  | 3903 | 122 | 70.38% | 8.7780<br>29 | 86  | 52.88% | 6.194<br>725 | -                 |
| 58202                        | 2653 | 122 | 80.93% | 12.913<br>93 | 91  | 62.87% | 9.643<br>313 | Cobra1            |
| 71947                        | 4996 | 122 | 61.69% | 6.8576<br>15 | 85  | 47.98% | 4.783<br>201 | 2310067<br>B10Rik |
| 16592                        | 932  | 122 | 61.91% | 36.760<br>35 | 144 | 59.33% | 43.43<br>789 | Fabp5             |
| 233912                       | 3852 | 122 | 63.53% | 8.8942<br>49 | 115 | 57.24% | 8.393<br>318 | Armc5             |
| gi 110347401 ref NM_010066.3 | 5271 | 122 | 64.47% | 6.4998<br>38 | 65  | 41.17% | 3.466<br>909 | -                 |
| 105246                       | 2494 | 122 | 82.68% | 13.737<br>23 | 118 | 75.46% | 13.30<br>172 | Brd9              |
| 17688                        | 4288 | 122 | 66.25% | 7.9898<br>89 | 99  | 59%    | 6.490<br>864 | Msh6              |
| 231915                       | 3949 | 122 | 63.69% | 8.6757<br>78 | 84  | 52.42% | 5.980<br>18  | Usp1l             |

|                              |       |     |        |              |     |        |              |                   |
|------------------------------|-------|-----|--------|--------------|-----|--------|--------------|-------------------|
| gi 124486679 ref NM_008400.2 | 3892  | 121 | 72.05% | 8.7306<br>84 | 55  | 48.28% | 3.972<br>94  | -                 |
| 19777                        | 3459  | 121 | 67.56% | 9.8235<br>97 | 93  | 60.13% | 7.558<br>829 | C80913            |
| 22278                        | 1822  | 121 | 89.41% | 18.649<br>74 | 85  | 82.11% | 13.11<br>574 | Usf1              |
| 381695                       | 8998  | 121 | 33.16% | 3.7763<br>75 | 104 | 30.04% | 3.249<br>447 | N4bp212           |
| 76626                        | 6505  | 121 | 53.05% | 5.2236<br>46 | 99  | 46.59% | 4.278<br>682 | Msi2              |
| 219094                       | 3876  | 121 | 73.12% | 8.7667<br>24 | 61  | 54.88% | 4.424<br>541 | Khynyn            |
| 19106                        | 4343  | 121 | 61.59% | 7.8240<br>43 | 131 | 61.11% | 8.480<br>151 | Eif2ak2           |
| 20187                        | 3267  | 121 | 68.17% | 10.400<br>92 | 109 | 62.11% | 9.379<br>927 | Ryk               |
| gi 6679824 ref NM_008035.1   | 1223  | 121 | 76.04% | 27.783<br>99 | 74  | 70.73% | 17.01<br>09  | -                 |
| 69668                        | 1721  | 121 | 62.46% | 19.744<br>23 | 98  | 48.58% | 16.00<br>911 | Ccdc115           |
| 18027                        | 9528  | 121 | 41.62% | 3.5663<br>12 | 307 | 58.41% | 9.058<br>551 | Nfia              |
| 66841                        | 2281  | 121 | 82.07% | 14.896<br>9  | 136 | 89.87% | 16.76<br>238 | Etfdh             |
| 72199                        | 3965  | 121 | 64.89% | 8.5699<br>42 | 84  | 53.87% | 5.956<br>048 | Mms19             |
| 24083                        | 4159  | 121 | 59.37% | 8.1701<br>9  | 75  | 50.28% | 5.069<br>842 | Gm1651<br>5       |
| 19265                        | 853   | 121 | 97.19% | 39.835<br>66 | 73  | 85.23% | 24.06<br>002 | Ptprcap           |
| 75620                        | 1236  | 121 | 86.73% | 27.491<br>76 | 111 | 85.84% | 25.24<br>798 | 2810422<br>J05Rik |
| gi 37693504 ref NM_198127.1  | 5605  | 121 | 57.36% | 6.0624<br>12 | 141 | 65.82% | 7.072<br>38  | -                 |
| 237082                       | 2484  | 121 | 73.51% | 13.679<br>48 | 107 | 73.23% | 12.11<br>028 | Nxt2              |
| 382620                       | 7179  | 120 | 48.92% | 4.6941<br>07 | 59  | 30.17% | 2.310<br>522 | Tmed8             |
| 99526                        | 4014  | 120 | 65.40% | 8.3953<br>65 | 102 | 58.45% | 7.144<br>057 | Usp53             |
| 15468                        | 2055  | 120 | 85.16% | 16.398<br>54 | 75  | 77.91% | 10.26<br>057 | Prmt2             |
| 68813                        | 10335 | 120 | 40.91% | 3.2606<br>67 | 170 | 46.72% | 4.624<br>455 | Dock5             |



|                              |      |     |        |              |     |        |              |        |
|------------------------------|------|-----|--------|--------------|-----|--------|--------------|--------|
| 51902                        | 5594 | 120 | 53.97% | 6.0241<br>32 | 88  | 38.85% | 4.422<br>648 | Rnf24  |
| 23897                        | 1117 | 120 | 50.49% | 30.169<br>2  | 123 | 50.94% | 30.95<br>808 | Hax1   |
| gi 19527263 ref NM_134048.1  | 1885 | 120 | 89.44% | 17.877<br>45 | 114 | 85.09% | 17.00<br>261 | -      |
| 18002                        | 602  | 120 | 97.51% | 55.978<br>4  | 167 | 97.01% | 77.99<br>057 | Nedd8  |
| 26891                        | 1771 | 120 | 88.20% | 19.028<br>23 | 141 | 84.87% | 22.38<br>323 | Cops4  |
| 68944                        | 4474 | 120 | 25.64% | 7.5321<br>85 | 133 | 25.57% | 8.357<br>527 | Tmco1  |
| 18771                        | 4460 | 120 | 68.12% | 7.5558<br>29 | 104 | 52.60% | 6.555<br>723 | Pknox1 |
| 67976                        | 2393 | 120 | 85.71% | 14.082<br>32 | 75  | 76.35% | 8.811<br>314 | Trabd  |
| gi 142367240 ref NM_010394.3 | 1345 | 120 | 25.06% | 25.055<br>02 | 147 | 22.75% | 30.72<br>679 | -      |
| 67489                        | 2914 | 120 | 73.20% | 11.564<br>51 | 109 | 75.67% | 10.51<br>621 | Ap4b1  |
| 57377                        | 2798 | 120 | 76.38% | 12.043<br>96 | 87  | 64.37% | 8.741<br>655 | Mogs   |
| 231413                       | 2749 | 120 | 75.85% | 12.258<br>64 | 99  | 74.14% | 10.12<br>471 | Grsf1  |
| 12952                        | 3035 | 120 | 75.82% | 11.103<br>46 | 133 | 73.48% | 12.32<br>012 | Cry1   |
| 108723                       | 4112 | 120 | 70.50% | 8.1952<br>81 | 48  | 33.24% | 3.281<br>786 | Card11 |
| 233011                       | 3260 | 120 | 70.74% | 10.337<br>12 | 171 | 79.63% | 14.74<br>69  | Itpkc  |
| 117149                       | 4749 | 120 | 64.18% | 7.0960<br>19 | 112 | 60.50% | 6.630<br>373 | Tirap  |
| 107976                       | 1410 | 120 | 81.06% | 23.9         | 148 | 80.71% | 29.50<br>969 | Bre    |
| 66437                        | 966  | 119 | 75.67% | 34.594<br>38 | 131 | 87.47% | 38.12<br>556 | Fis1   |
| 16554                        | 5603 | 119 | 55.72% | 5.9643<br>35 | 59  | 33.84% | 2.960<br>421 | Kif13b |
| 241322                       | 4535 | 119 | 58.37% | 7.3689<br>46 | 97  | 55.99% | 6.013<br>351 | Zbtb6  |
| 29869                        | 5813 | 119 | 52.16% | 5.7488<br>68 | 85  | 40.81% | 4.110<br>936 | Ulk2   |
| 234203                       | 5107 | 119 | 18.15% | 6.5436<br>01 | 125 | 16.49% | 6.881<br>233 | Zfp353 |

|                                 |       |     |        |              |     |        |              |                   |
|---------------------------------|-------|-----|--------|--------------|-----|--------|--------------|-------------------|
| gi 253314407 ref NM_198170.3    | 10953 | 119 | 34.21% | 3.0510<br>52 | 65  | 20.01% | 1.668<br>408 | -                 |
| 17692                           | 2320  | 119 | 84.05% | 14.404<br>38 | 78  | 74.40% | 9.452<br>109 | Msl3              |
| 77582                           | 2880  | 119 | 59.51% | 11.603<br>53 | 116 | 58.65% | 11.32<br>368 | Mboat7            |
| 231868                          | 2343  | 119 | 71.96% | 14.262<br>98 | 82  | 71.83% | 9.839<br>288 | E130309<br>D02Rik |
| 81630                           | 2680  | 119 | 75.82% | 12.469<br>47 | 98  | 72.46% | 10.28<br>048 | Zbtb22            |
| 67273                           | 1222  | 119 | 92.14% | 27.347<br>11 | 113 | 97.38% | 25.99<br>737 | Ndufa10           |
| 77938                           | 5211  | 119 | 60.01% | 6.4130<br>05 | 95  | 49.43% | 5.125<br>363 | Fam53b            |
| 68268                           | 8751  | 119 | 45.37% | 3.8187<br>83 | 97  | 36.73% | 3.116<br>278 | Zdhhc21           |
| 225280                          | 2360  | 119 | 88.22% | 14.160<br>24 | 103 | 73.43% | 12.27<br>008 | Ino80c            |
| 68969                           | 917   | 119 | 93.68% | 36.442<br>93 | 100 | 88.44% | 30.65<br>863 | Eif1b             |
| 75062                           | 1710  | 119 | 91.11% | 19.542<br>79 | 99  | 90.64% | 16.27<br>651 | Sf3a3             |
| 28113                           | 1754  | 119 | 88.65% | 19.052<br>55 | 86  | 79.53% | 13.78<br>45  | Tinf2             |
| 12140                           | 762   | 119 | 95.93% | 43.855<br>87 | 196 | 97.38% | 72.31<br>414 | Fabp7             |
| 380928                          | 6123  | 119 | 54.68% | 5.4578<br>1  | 61  | 37.42% | 2.800<br>836 | Lmo7              |
| 234686                          | 3951  | 119 | 64.87% | 8.4581<br>55 | 98  | 63.35% | 6.973<br>345 | Fhod1             |
| 11757                           | 1445  | 119 | 86.57% | 23.126<br>76 | 145 | 92.73% | 28.21<br>125 | Prdx3             |
| 24135                           | 4731  | 119 | 51.22% | 7.0636<br>59 | 96  | 42.63% | 5.704<br>8   | Zfp68             |
| 14313                           | 2337  | 119 | 76.17% | 14.299<br>6  | 94  | 76.17% | 11.30<br>814 | Fst               |
| 66887                           | 2936  | 119 | 77.59% | 11.382<br>21 | 91  | 69.45% | 8.713<br>797 | Lonp2             |
| 26384                           | 2300  | 119 | 52.83% | 14.529<br>64 | 104 | 52.87% | 12.71<br>24  | Gnpda1            |
| gi 126723292 ref NM_001082476.1 | 4751  | 118 | 64.41% | 6.9748<br>15 | 52  | 40.14% | 3.077<br>092 | -                 |
| 668218                          | 1635  | 118 | 81.71% | 20.267<br>49 | 103 | 82.45% | 17.71<br>094 | Bin2              |

|                              |      |     |        |              |     |        |              |            |
|------------------------------|------|-----|--------|--------------|-----|--------|--------------|------------|
| 236792                       | 4084 | 118 | 69.69% | 8.1139<br>44 | 87  | 53.09% | 5.989<br>018 | Mmgt1      |
| 65111                        | 4628 | 118 | 35.80% | 7.1601<br>87 | 99  | 35.09% | 6.014<br>007 | Dap3       |
| 107513                       | 9306 | 118 | 25.96% | 3.5608<br>58 | 90  | 24.21% | 2.718<br>952 | Ssr1       |
| 18805                        | 4987 | 118 | 60.64% | 6.6447<br>45 | 101 | 55.32% | 5.693<br>825 | Pld1       |
| 66979                        | 1694 | 118 | 74.91% | 19.561<br>6  | 129 | 74.14% | 21.40<br>91  | Pole4      |
| gi 38372906 ref NM_197982.2  | 1634 | 118 | 87.88% | 20.279<br>89 | 95  | 84.94% | 16.34<br>533 | -          |
| 14154                        | 6834 | 118 | 51.93% | 4.8488<br>95 | 95  | 47.03% | 3.908<br>146 | Fem1a      |
| 52626                        | 1880 | 118 | 83.30% | 17.626<br>25 | 108 | 87.07% | 16.15<br>058 | Cdkn2aipnl |
| 93730                        | 3438 | 118 | 54.89% | 9.6385<br>53 | 99  | 46.74% | 8.095<br>645 | Lztf11     |
| 21973                        | 5217 | 118 | 56.47% | 6.3518<br>01 | 117 | 57.18% | 6.305<br>03  | Top2a      |
| 67872                        | 1484 | 118 | 73.85% | 22.329<br>75 | 106 | 70.35% | 20.08<br>14  | Nsmce4a    |
| 233490                       | 4961 | 118 | 55.19% | 6.6795<br>7  | 100 | 54.34% | 5.666<br>996 | Crebzf     |
| 50931                        | 2671 | 118 | 79.71% | 12.406<br>34 | 89  | 74.35% | 9.367<br>814 | Il27ra     |
| 225326                       | 3102 | 118 | 76.63% | 10.682<br>57 | 92  | 66.67% | 8.338<br>12  | Pik3c3     |
| 76524                        | 2136 | 118 | 84.22% | 15.513<br>74 | 102 | 75.66% | 13.42<br>521 | Cln6       |
| gi 146149235 ref NM_172284.4 | 6612 | 118 | 52.28% | 5.0116<br>98 | 60  | 30.84% | 2.551<br>177 | -          |
| 52552                        | 3088 | 118 | 72.77% | 10.731<br>01 | 44  | 46.05% | 4.005<br>876 | Parp8      |
| 22368                        | 2751 | 118 | 83.42% | 12.045<br>56 | 65  | 59.72% | 6.642<br>704 | Trpv2      |
| 207932                       | 7381 | 118 | 48.33% | 4.4895<br>47 | 89  | 39.47% | 3.389<br>978 | Urb1       |
| 56294                        | 4087 | 118 | 69.51% | 8.1079<br>88 | 83  | 61.51% | 5.709<br>467 | Ptpn9      |
| 21887                        | 5202 | 118 | 29.64% | 6.3701<br>16 | 106 | 28.10% | 5.728<br>721 | Tle3       |
| 100017                       | 2671 | 118 | 81.62% | 12.406<br>34 | 109 | 78.77% | 11.47<br>294 | Ldlrap1    |

|                                  |      |     |        |              |     |        |              |                   |
|----------------------------------|------|-----|--------|--------------|-----|--------|--------------|-------------------|
| gi 148747503 ref N<br>M_023844.4 | 1349 | 118 | 84.28% | 24.564<br>38 | 45  | 68.57% | 9.378<br>269 | -                 |
| 68966                            | 1229 | 117 | 80.39% | 26.734<br>35 | 116 | 79.50% | 26.53<br>556 | Ngdn              |
| 76800                            | 5151 | 117 | 57.46% | 6.3786<br>68 | 77  | 47.10% | 4.202<br>631 | Usp42             |
| gi 146134413 ref N<br>M_010589.5 | 3740 | 117 | 67.38% | 8.7851<br>66 | 78  | 57.25% | 5.863<br>341 | -                 |
| 328099                           | 4010 | 117 | 63.52% | 8.1936<br>46 | 82  | 51.02% | 5.748<br>991 | Prps113           |
| 104444                           | 1075 | 117 | 88.93% | 30.564<br>21 | 122 | 82.79% | 31.90<br>608 | Rexo2             |
| 66072                            | 3116 | 117 | 61.30% | 10.544<br>45 | 88  | 53.11% | 7.939<br>759 | Sdhaf2            |
| 70430                            | 1807 | 117 | 76.76% | 18.182<br>91 | 99  | 79.69% | 15.40<br>278 | Tbce              |
| 69957                            | 2253 | 117 | 80.07% | 14.583<br>45 | 95  | 79.23% | 11.85<br>454 | Cdc16             |
| 192173                           | 1286 | 117 | 86.94% | 25.549<br>39 | 92  | 82.66% | 20.11<br>264 | Fam195b           |
| 234463                           | 2701 | 117 | 65.46% | 12.164<br>58 | 84  | 60.72% | 8.743<br>329 | Tmem18<br>4c      |
| 227937                           | 4642 | 117 | 61.72% | 7.0780<br>96 | 130 | 62.09% | 7.873<br>364 | Pkp4              |
| 14772                            | 3240 | 117 | 28.77% | 10.140<br>9  | 129 | 28.55% | 11.19<br>352 | Grk4              |
| 108097                           | 4278 | 117 | 73.68% | 7.6803<br>46 | 142 | 68.89% | 9.331<br>892 | Prkab2            |
| 21885                            | 4369 | 117 | 59.67% | 7.5203<br>76 | 153 | 62.17% | 9.845<br>358 | Tle1              |
| 105348                           | 3693 | 117 | 76.17% | 8.8969<br>73 | 138 | 71.27% | 10.50<br>563 | Golm1             |
| 54387                            | 6400 | 117 | 55.80% | 5.1338<br>31 | 83  | 41.63% | 3.646<br>03  | Mcm3ap            |
| 217342                           | 5192 | 117 | 61.77% | 6.3282<br>98 | 76  | 46.63% | 4.115<br>296 | Ube2o             |
| 234678                           | 2873 | 117 | 68.95% | 11.436<br>31 | 69  | 59.59% | 6.752<br>049 | D230025<br>D16Rik |
| gi 149255582 ref X<br>M_984731.2 | 452  | 117 | 85.40% | 72.691<br>42 | 43  | 78.76% | 26.74<br>559 | -                 |
| 66610                            | 4038 | 117 | 39.65% | 8.1368<br>3  | 102 | 42.35% | 7.101<br>596 | Abi3              |
| 58206                            | 1783 | 117 | 84.07% | 18.427<br>66 | 70  | 75.21% | 11.03<br>745 | Zbtb32            |

|                                 |      |     |        |              |     |        |              |                   |
|---------------------------------|------|-----|--------|--------------|-----|--------|--------------|-------------------|
| 381410                          | 3740 | 116 | 70.86% | 8.7100<br>79 | 106 | 65.51% | 7.968<br>129 | Zfp408            |
| 20917                           | 2279 | 116 | 83.19% | 14.293<br>86 | 163 | 90.30% | 20.10<br>784 | Suclg2            |
| 70312                           | 2724 | 116 | 74.16% | 11.958<br>77 | 94  | 67.58% | 9.701<br>589 | Cactin            |
| 67943                           | 4492 | 116 | 39.09% | 7.2519<br>36 | 79  | 34.39% | 4.944<br>353 | Mesdc2            |
| 231287                          | 6048 | 116 | 53.87% | 5.3861<br>93 | 124 | 55.92% | 5.764<br>107 | Atp10d            |
| 93691                           | 1344 | 116 | 90.25% | 24.237<br>87 | 128 | 91.67% | 26.77<br>521 | Klf7              |
| 67177                           | 2245 | 116 | 85.52% | 14.510<br>33 | 77  | 80.85% | 9.642<br>652 | Cdt1              |
| 15000                           | 786  | 116 | 67.56% | 41.444<br>91 | 73  | 64.63% | 26.11<br>094 | H2-DMb<br>2       |
| 18969                           | 2424 | 116 | 78.42% | 13.438<br>82 | 92  | 71.62% | 10.67<br>032 | Pola2             |
| 57813                           | 2400 | 116 | 84.88% | 13.573<br>21 | 65  | 58.63% | 7.614<br>199 | Tk2               |
| 22327                           | 1601 | 116 | 90.76% | 20.347<br>09 | 121 | 82.76% | 21.24<br>791 | Vbp1              |
| 56456                           | 1969 | 116 | 84%    | 16.544<br>28 | 82  | 72.27% | 11.70<br>82  | Act16a            |
| 1E+08                           | 2177 | 116 | 5.79%  | 14.963<br>57 | 127 | 5.79%  | 16.40<br>089 | Gm2326            |
| 68250                           | 1253 | 116 | 82.76% | 25.998<br>16 | 106 | 79.97% | 23.78<br>356 | Fam96a            |
| 67912                           | 2756 | 116 | 72.24% | 11.819<br>92 | 99  | 76.92% | 10.09<br>899 | 1600012<br>H06Rik |
| 70373                           | 3947 | 116 | 70.08% | 8.2532<br>8  | 79  | 56.37% | 5.627<br>067 | 1700020<br>O03Rik |
| 27426                           | 2249 | 116 | 81.37% | 14.484<br>52 | 117 | 75.41% | 14.62<br>576 | Nagpa             |
| 18176                           | 4470 | 116 | 29.17% | 7.2876<br>28 | 120 | 26.53% | 7.547<br>373 | Nras              |
| gi 21703811 ref N<br>M_145406.1 | 1942 | 116 | 81.93% | 16.774<br>3  | 68  | 71.52% | 9.844<br>231 | -                 |
| 20810                           | 1328 | 116 | 86.67% | 24.529<br>89 | 97  | 87.42% | 20.53<br>505 | Srm               |
| 66477                           | 370  | 116 | 92.97% | 88.042<br>42 | 158 | 88.38% | 120.0<br>542 | Usmg5             |
| gi 94364769 ref X<br>M_622868.3 | 2903 | 116 | 23.84% | 11.221<br>39 | 126 | 27.11% | 12.20<br>241 | -                 |

|                                     |      |     |        |              |     |        |              |              |
|-------------------------------------|------|-----|--------|--------------|-----|--------|--------------|--------------|
| 12764                               | 1760 | 115 | 83.13% | 18.349<br>36 | 103 | 85.34% | 16.45<br>306 | Cmas         |
| 68991                               | 1478 | 115 | 64.07% | 21.850<br>39 | 122 | 73.07% | 23.20<br>639 | Ssu72        |
| 68988                               | 3143 | 115 | 66.56% | 10.275<br>17 | 76  | 55.52% | 6.798<br>159 | Prpf31       |
| 23984                               | 7717 | 115 | 48.79% | 4.1849       | 63  | 31.31% | 2.295<br>166 | Pde10a       |
| gi 146198650 ref N<br>M_172615.3    | 5237 | 115 | 58.45% | 6.1666<br>74 | 63  | 32.19% | 3.382<br>051 | -            |
| 20813                               | 790  | 115 | 88.86% | 40.879<br>58 | 123 | 82.41% | 43.77<br>238 | Srp14        |
| 210105                              | 4993 | 115 | 57.18% | 6.4680<br>29 | 117 | 60.10% | 6.587<br>891 | Zfp719       |
| gi 149266278 ref X<br>M_001473941.1 | 9690 | 115 | 25.43% | 3.3328<br>04 | 91  | 21.84% | 2.640<br>218 | -            |
| 217410                              | 4198 | 115 | 62.60% | 7.6929<br>18 | 72  | 52.55% | 4.821<br>833 | Trib2        |
| 269470                              | 3440 | 115 | 73.90% | 9.3880<br>44 | 101 | 67.24% | 8.254<br>391 | Wdr3         |
| 67533                               | 4893 | 115 | 35.01% | 6.6002<br>19 | 146 | 29.20% | 8.388<br>798 | Ppfibp1      |
| 57267                               | 2124 | 115 | 84.93% | 15.204<br>74 | 130 | 83.43% | 17.20<br>723 | Apba3        |
| 53861                               | 2616 | 115 | 83.94% | 12.345<br>13 | 117 | 89.07% | 12.57<br>391 | Zranb2       |
| 56224                               | 3172 | 115 | 74.84% | 10.181<br>23 | 119 | 73.71% | 10.54<br>717 | Tspan5       |
| 67184                               | 1266 | 115 | 36.41% | 25.509<br>38 | 130 | 36.97% | 28.86<br>9   | Ndufa13      |
| 15439                               | 1365 | 115 | 86.45% | 23.659<br>25 | 183 | 89.74% | 37.69<br>125 | Hp           |
| 381668                              | 4737 | 115 | 59.17% | 6.8175<br>79 | 133 | 63.88% | 7.893<br>514 | Fbrs11       |
| 76763                               | 2015 | 115 | 85.16% | 16.027<br>23 | 86  | 73.50% | 11.99<br>901 | Mospd2       |
| 109778                              | 1394 | 115 | 78.19% | 23.167<br>05 | 104 | 78.41% | 20.97<br>455 | Blvra        |
| 21871                               | 3037 | 115 | 79.03% | 10.633<br>81 | 59  | 50.21% | 5.461<br>719 | Atp6v0a<br>2 |
| 239393                              | 4064 | 115 | 65.58% | 7.9465<br>73 | 109 | 59.50% | 7.540<br>409 | Lrp12        |
| 67065                               | 2049 | 114 | 85.46% | 15.624<br>23 | 142 | 87.07% | 19.48<br>357 | Polr3d       |

|                                  |      |     |        |              |     |        |              |          |
|----------------------------------|------|-----|--------|--------------|-----|--------|--------------|----------|
| 240752                           | 7929 | 114 | 42.49% | 4.0375<br>89 | 42  | 19.75% | 1.489<br>2   | Pik3c2b  |
| 78926                            | 3986 | 114 | 26.57% | 8.0316<br>22 | 87  | 28.70% | 6.136<br>265 | Gas211   |
| gi 118130356 ref N<br>M_027296.2 | 2207 | 114 | 63.84% | 14.505<br>68 | 151 | 71.68% | 19.23<br>52  | -        |
| 68979                            | 3168 | 114 | 69.32% | 10.105<br>44 | 120 | 76.20% | 10.64<br>923 | NoI11    |
| 18515                            | 2801 | 114 | 67.33% | 11.429<br>51 | 82  | 63.08% | 8.230<br>436 | Pbx2     |
| 71778                            | 3422 | 114 | 58.33% | 9.3553<br>61 | 86  | 60.78% | 7.065<br>462 | Klhl5    |
| 18570                            | 1524 | 114 | 61.29% | 21.006<br>59 | 112 | 69.49% | 20.66<br>118 | Pdcd6    |
| 72053                            | 2096 | 114 | 83.25% | 15.273<br>88 | 83  | 78.24% | 11.13<br>292 | Tmub2    |
| 66645                            | 2375 | 114 | 75.33% | 13.479<br>6  | 121 | 84.46% | 14.32<br>333 | Pspc1    |
| 18073                            | 6046 | 114 | 41.91% | 5.2950<br>79 | 60  | 27.34% | 2.790<br>007 | Nid1     |
| 76983                            | 2091 | 114 | 82.31% | 15.310<br>4  | 100 | 80.20% | 13.44<br>523 | Scfd1    |
| gi 48976071 ref N<br>M_030253.2  | 3565 | 114 | 67.94% | 8.9800<br>97 | 112 | 60.65% | 8.832<br>438 | -        |
| 107476                           | 9054 | 114 | 25.10% | 3.5359<br>01 | 64  | 19.42% | 1.987<br>292 | Acaca    |
| gi 42490750 ref N<br>M_021604.2  | 6866 | 114 | 45.28% | 4.6626<br>92 | 110 | 42.09% | 4.504<br>131 | -        |
| 114896                           | 4288 | 114 | 60.52% | 7.4659<br>62 | 98  | 60.70% | 6.425<br>3   | Afg311   |
| 52348                            | 6379 | 114 | 39.16% | 5.0186<br>62 | 87  | 38.88% | 3.834<br>324 | Vps37a   |
| 50755                            | 3539 | 114 | 69.79% | 9.0460<br>71 | 73  | 59.28% | 5.799<br>151 | Fbxo18   |
| gi 146198662 ref N<br>M_172903.3 | 4022 | 114 | 66.26% | 7.9597<br>33 | 55  | 43.39% | 3.844<br>525 | -        |
| 20524                            | 1667 | 114 | 94%    | 19.204<br>59 | 137 | 94.42% | 23.10<br>506 | Slc25a17 |
| gi 22122422 ref N<br>M_145978.1  | 1550 | 114 | 89.81% | 20.654<br>22 | 90  | 87.42% | 16.32<br>424 | -        |
| 20818                            | 2991 | 114 | 71.82% | 10.703<br>46 | 108 | 70.08% | 10.15<br>148 | Srprb    |
| 64136                            | 1118 | 114 | 88.55% | 28.635<br>1  | 120 | 83.63% | 30.17<br>599 | Sdf211   |

|        |      |     |        |              |     |        |              |                   |
|--------|------|-----|--------|--------------|-----|--------|--------------|-------------------|
| 108012 | 3204 | 113 | 59.93% | 9.9042<br>51 | 101 | 60.24% | 8.862<br>393 | Ap1s2             |
| 110168 | 1334 | 113 | 93.10% | 23.788<br>02 | 94  | 83.88% | 19.81<br>044 | Gpr18             |
| 68251  | 1592 | 113 | 79.77% | 19.932<br>93 | 111 | 84.23% | 19.60<br>207 | Babam1            |
| 15159  | 2383 | 113 | 79.44% | 13.316<br>5  | 76  | 69.87% | 8.966<br>267 | Hccs              |
| 15361  | 2004 | 113 | 26.60% | 15.834<br>94 | 149 | 29.49% | 20.90<br>31  | Hmga1             |
| 98985  | 1830 | 113 | 82.79% | 17.340<br>56 | 95  | 80.66% | 14.59<br>468 | Clp1              |
| 233781 | 3070 | 113 | 79.02% | 10.336<br>55 | 57  | 53.71% | 5.219<br>857 | Xylt1             |
| 269473 | 7134 | 113 | 45.33% | 4.4481<br>67 | 89  | 40.72% | 3.507<br>349 | Lrig2             |
| 102058 | 7427 | 113 | 44.86% | 4.2726<br>84 | 51  | 26.94% | 1.930<br>54  | Exoc8             |
| 209361 | 4821 | 113 | 58.51% | 6.5822<br>9  | 139 | 64.43% | 8.105<br>873 | Taf3              |
| 209018 | 5032 | 113 | 62.24% | 6.3062<br>84 | 110 | 54.53% | 6.145<br>74  | Vps8              |
| 66642  | 2731 | 113 | 61.92% | 11.619<br>63 | 112 | 63.42% | 11.52<br>971 | Ctnnb1            |
| 223753 | 4562 | 113 | 23.02% | 6.9559<br>89 | 77  | 19.31% | 4.745<br>233 | Cerk              |
| 56214  | 1802 | 113 | 86.51% | 17.61        | 78  | 81.08% | 12.16<br>92  | Scamp4            |
| 52717  | 1329 | 113 | 92.78% | 23.877<br>52 | 95  | 86.53% | 20.09<br>651 | Anapc16           |
| 17219  | 2901 | 113 | 76.01% | 10.938<br>72 | 96  | 68.87% | 9.303<br>484 | Mcm6              |
| 215705 | 1731 | 113 | 84.52% | 18.332<br>31 | 85  | 81.34% | 13.80<br>524 | Arrdc1            |
| 235036 | 1671 | 113 | 86%    | 18.990<br>56 | 101 | 82.47% | 16.99<br>288 | Ppan              |
| 76789  | 2256 | 112 | 78.37% | 13.941<br>66 | 71  | 72.47% | 8.847<br>924 | Mzt1              |
| 68653  | 1673 | 112 | 93.48% | 18.8         | 114 | 89.96% | 19.15<br>716 | Samm50            |
| 66975  | 3563 | 112 | 64.30% | 8.8275<br>04 | 71  | 53.94% | 5.602<br>278 | 2410002<br>O22Rik |
| 56360  | 1548 | 112 | 83.66% | 20.318<br>09 | 115 | 90.05% | 20.88<br>57  | Acot9             |



|        |      |     |        |              |     |        |              |                   |
|--------|------|-----|--------|--------------|-----|--------|--------------|-------------------|
| 54601  | 3162 | 112 | 78.43% | 9.9469<br>94 | 62  | 51.96% | 5.512<br>542 | Foxo4             |
| 1E+08  | 3046 | 112 | 63.59% | 10.325<br>8  | 73  | 45.54% | 6.737<br>753 | 5430417<br>L22Rik |
| 52202  | 3445 | 112 | 65.57% | 9.1298<br>68 | 118 | 62.67% | 9.629<br>747 | Rbm34             |
| 104718 | 3458 | 112 | 68.13% | 9.0955<br>45 | 89  | 62.29% | 7.235<br>81  | Ttc7b             |
| 76804  | 4271 | 112 | 66.75% | 7.3641<br>76 | 80  | 53.38% | 5.266<br>02  | Kdm4c             |
| 14712  | 2984 | 112 | 69.17% | 10.540<br>35 | 96  | 62.40% | 9.044<br>708 | Gnpat             |
| 18605  | 3224 | 112 | 79.93% | 9.7557<br>06 | 91  | 64.45% | 7.935<br>394 | Enpp1             |
| 74352  | 5711 | 112 | 50.97% | 5.5073<br>36 | 110 | 56.14% | 5.415<br>052 | Zfp84             |
| 11630  | 7416 | 112 | 41.56% | 4.2411<br>54 | 78  | 33.87% | 2.956<br>971 | Aim1              |
| 66235  | 926  | 112 | 97.84% | 33.965<br>87 | 123 | 94.28% | 37.34<br>361 | Eif1ax            |
| 56455  | 2037 | 112 | 36.23% | 15.440<br>55 | 118 | 33.82% | 16.28<br>595 | Dynl1l            |
| 218460 | 3063 | 112 | 75.68% | 10.268<br>49 | 90  | 62.13% | 8.260<br>715 | Wdr41             |
| 53859  | 4173 | 112 | 64.17% | 7.5371<br>19 | 106 | 61.95% | 7.141<br>338 | Map3k1<br>4       |
| 66482  | 4277 | 112 | 63.36% | 7.3538<br>45 | 92  | 57.89% | 6.047<br>428 | Exoc2             |
| 68767  | 2904 | 112 | 64.29% | 10.830<br>71 | 83  | 55.61% | 8.035<br>328 | Wash              |
| 270201 | 4573 | 111 | 63.98% | 6.8164<br>38 | 74  | 43.41% | 4.549<br>384 | Klh18             |
| 77056  | 3322 | 111 | 76.22% | 9.3833<br>75 | 87  | 55.96% | 7.362<br>779 | Tmco4             |
| 18537  | 1917 | 111 | 76.94% | 16.260<br>6  | 128 | 72.30% | 18.77<br>198 | Pcmt1             |
| 20623  | 4860 | 111 | 56.44% | 6.4139<br>03 | 114 | 59.03% | 6.594<br>634 | Snrk              |
| 242736 | 3882 | 111 | 64.99% | 8.0297<br>71 | 83  | 57.83% | 6.010<br>972 | Pramef8           |
| 67788  | 1583 | 111 | 31.71% | 19.691<br>45 | 148 | 33.10% | 26.28<br>469 | Sfr1              |
| 224907 | 2321 | 111 | 88.50% | 13.430<br>23 | 82  | 74.45% | 9.932<br>552 | Dus3l             |

|                             |       |     |        |              |     |        |              |              |
|-----------------------------|-------|-----|--------|--------------|-----|--------|--------------|--------------|
| 231821                      | 2418  | 111 | 78.25% | 12.891<br>47 | 136 | 85.77% | 15.81<br>265 | Adap1        |
| 140810                      | 11152 | 111 | 37.13% | 2.7951<br>55 | 73  | 25.66% | 1.840<br>315 | Ttbk2        |
| 69256                       | 5487  | 111 | 57.12% | 5.6809<br>86 | 78  | 44.23% | 3.996<br>518 | Zfp397       |
| 269951                      | 1718  | 111 | 80.91% | 18.144<br>1  | 124 | 85.16% | 20.29<br>18  | Idh2         |
| 66163                       | 1312  | 111 | 74.77% | 23.758<br>82 | 104 | 69.89% | 22.28<br>546 | Mrpl4        |
| 98956                       | 3856  | 111 | 72.85% | 8.0839<br>14 | 79  | 58.53% | 5.759<br>863 | Nat10        |
| 57376                       | 2961  | 111 | 34.65% | 10.527<br>38 | 95  | 35.02% | 9.020<br>016 | Smarce1      |
| 22003                       | 1702  | 111 | 76.73% | 18.314<br>67 | 63  | 63.92% | 10.40<br>646 | Tpm1         |
| 213498                      | 5617  | 111 | 53.12% | 5.5495<br>05 | 91  | 48.69% | 4.554<br>693 | Arhgef1<br>1 |
| 17995                       | 1572  | 111 | 91.16% | 19.829<br>24 | 102 | 91.22% | 18.24<br>189 | Ndufv1       |
| 218441                      | 5451  | 111 | 58.37% | 5.7185<br>05 | 51  | 29.99% | 2.630<br>366 | Zfyve16      |
| 20688                       | 5770  | 111 | 55.48% | 5.4023<br>52 | 77  | 39.88% | 3.751<br>777 | Sp4          |
| 50758                       | 17001 | 111 | 19.23% | 1.8335<br>14 | 91  | 17.14% | 1.504<br>836 | Fbxl17       |
| 263406                      | 4955  | 111 | 58.85% | 6.2909<br>33 | 82  | 45.99% | 4.652<br>564 | Plekhg3      |
| 23797                       | 4735  | 111 | 59.77% | 6.5832<br>25 | 118 | 60.08% | 7.006<br>226 | Akt3         |
| 21981                       | 4355  | 111 | 62.71% | 7.1576<br>51 | 90  | 54.28% | 5.810<br>004 | Ppp1r13<br>b |
| gi 31980956 ref NM_024211.2 | 1652  | 111 | 81.23% | 18.868<br>99 | 98  | 89.83% | 16.67<br>778 | -            |
| 20916                       | 2108  | 111 | 71.49% | 14.787<br>27 | 110 | 76%    | 14.67<br>048 | Sucla2       |
| 15182                       | 2004  | 111 | 81.39% | 15.554<br>68 | 100 | 70.11% | 14.02<br>893 | Hdac2        |
| 78255                       | 7019  | 111 | 50.31% | 4.4410<br>27 | 50  | 28.38% | 2.002<br>705 | Ralgps2      |
| 13557                       | 5106  | 111 | 52.66% | 6.1048<br>9  | 82  | 43.50% | 4.514<br>973 | E2f3         |
| 218442                      | 5393  | 110 | 56.48% | 5.7279<br>34 | 75  | 43.98% | 3.909<br>786 | Serinc5      |

|                              |       |     |        |              |     |        |              |                   |
|------------------------------|-------|-----|--------|--------------|-----|--------|--------------|-------------------|
| 84035                        | 4943  | 110 | 62.94% | 6.2493<br>92 | 77  | 51.97% | 4.379<br>477 | Kremen1           |
| 66059                        | 516   | 110 | 95.93% | 59.865<br>79 | 79  | 84.11% | 43.04<br>27  | Krtcap2           |
| 225020                       | 1911  | 110 | 81%    | 16.164<br>7  | 71  | 73.05% | 10.44<br>527 | Fez2              |
| 20055                        | 633   | 110 | 15.96% | 48.800<br>55 | 130 | 26.07% | 57.73<br>8   | Rps16             |
| 20266                        | 1568  | 110 | 75.38% | 19.700<br>73 | 123 | 80.99% | 22.05<br>369 | Scn1b             |
| 17095                        | 1818  | 110 | 69.36% | 16.991<br>61 | 73  | 59.90% | 11.28<br>889 | Lyl1              |
| 209683                       | 10780 | 110 | 35.14% | 2.8655<br>61 | 142 | 37.67% | 3.703<br>324 | Ttc28             |
| 20130                        | 946   | 110 | 90.49% | 32.654<br>07 | 155 | 91.75% | 46.06<br>411 | Rras              |
| 66999                        | 4568  | 110 | 28.11% | 6.7624<br>22 | 100 | 26.73% | 6.154<br>546 | Med28             |
| 217305                       | 2440  | 110 | 28.73% | 12.660<br>14 | 103 | 28.40% | 11.86<br>778 | Cd300ld           |
| gi 110347530 ref NM_145124.2 | 3883  | 110 | 66.57% | 7.9553<br>81 | 78  | 54.21% | 5.647<br>41  | -                 |
| 66249                        | 1578  | 110 | 86.95% | 19.575<br>88 | 91  | 88.47% | 16.21<br>274 | Pno1              |
| 103694                       | 1645  | 110 | 86.08% | 18.778<br>57 | 88  | 83.65% | 15.03<br>969 | Tmed4             |
| 80292                        | 5172  | 110 | 38.67% | 5.9726<br>89 | 112 | 41.96% | 6.088<br>098 | Zxdc              |
| 27801                        | 4887  | 110 | 53.26% | 6.3210<br>04 | 82  | 42.21% | 4.717<br>301 | Zdhhc8            |
| 14251                        | 1694  | 110 | 87.54% | 18.235<br>39 | 130 | 88.19% | 21.57<br>506 | Flot1             |
| 66874                        | 6284  | 109 | 38.96% | 4.8710<br>89 | 95  | 30.28% | 4.250<br>202 | 1200014<br>J11Rik |
| 70804                        | 3022  | 109 | 53.94% | 10.129<br>03 | 105 | 55.26% | 9.768<br>254 | Pgrmc2            |
| 69259                        | 2457  | 109 | 76.31% | 12.458<br>25 | 88  | 77.17% | 10.06<br>931 | Kctd5             |
| 20643                        | 508   | 109 | 91.54% | 60.255<br>75 | 117 | 90.35% | 64.75<br>067 | Snrpe             |
| 230793                       | 6602  | 109 | 48.26% | 4.6364<br>62 | 88  | 44%    | 3.747<br>393 | Ahdc1             |
| 76799                        | 772   | 109 | 85.62% | 39.650<br>16 | 96  | 98.96% | 34.96<br>037 | Tmem23<br>4       |

|                                  |      |     |        |              |     |        |              |                   |
|----------------------------------|------|-----|--------|--------------|-----|--------|--------------|-------------------|
| 66155                            | 964  | 109 | 94.40% | 31.753<br>03 | 111 | 91.60% | 32.37<br>189 | Ufc1              |
| gi 14389422 ref N<br>M_016741.1  | 2512 | 109 | 77.51% | 12.185<br>48 | 122 | 82.76% | 13.65<br>408 | -                 |
| 53970                            | 4189 | 109 | 62.90% | 7.3072<br>14 | 69  | 46.43% | 4.630<br>851 | Rfx5              |
| 216860                           | 5203 | 109 | 60.10% | 5.8831<br>29 | 68  | 44.99% | 3.674<br>322 | Neur14            |
| 20042                            | 535  | 109 | 11.59% | 57.214<br>81 | 112 | 11.59% | 58.85<br>541 | Rps12             |
| 107568                           | 5070 | 109 | 54.95% | 6.0374<br>6  | 75  | 45.46% | 4.158<br>871 | Wwp1              |
| 67610                            | 3849 | 109 | 63.21% | 7.9526<br>94 | 72  | 53.68% | 5.259<br>043 | Rspry1            |
| 57753                            | 3977 | 109 | 63.69% | 7.6967<br>36 | 100 | 57.25% | 7.069<br>139 | Noc31             |
| 13872                            | 2673 | 109 | 75.61% | 11.451<br>52 | 81  | 71.16% | 8.519<br>384 | Ercc3             |
| 321007                           | 5630 | 109 | 52.42% | 5.4369<br>31 | 109 | 52.02% | 5.443<br>024 | Serac1            |
| 212163                           | 3418 | 109 | 65.71% | 8.9555<br>06 | 92  | 67.20% | 7.567<br>247 | 8030462<br>N17Rik |
| gi 146149189 ref N<br>M_134125.3 | 2016 | 109 | 80.75% | 15.183<br>49 | 102 | 79.51% | 14.22<br>433 | -                 |
| 94220                            | 4582 | 109 | 62.24% | 6.6804<br>72 | 119 | 59.01% | 7.301<br>532 | Cnm4              |
| 26390                            | 6954 | 109 | 46.74% | 4.4017<br>72 | 82  | 37.13% | 3.315<br>135 | Mapkbp<br>1       |
| gi 149249850 ref X<br>R_035668.1 | 4702 | 109 | 9.59%  | 6.5099<br>79 | 111 | 10.38% | 6.636<br>857 | -                 |
| 18733                            | 2728 | 109 | 25.22% | 11.220<br>65 | 130 | 28.08% | 13.39<br>742 | Lilrb3            |
| 232910                           | 798  | 109 | 97.62% | 38.358<br>3  | 116 | 98.12% | 40.86<br>742 | Ap2s1             |
| 102141                           | 3067 | 109 | 80.93% | 9.9804<br>11 | 94  | 69.19% | 8.616<br>605 | Snx25             |
| 68961                            | 1644 | 109 | 79.38% | 18.619<br>17 | 99  | 77.49% | 16.92<br>994 | Phkg2             |
| 28105                            | 4556 | 108 | 59.75% | 6.6569<br>57 | 61  | 47.89% | 3.764<br>161 | Trim36            |
| 235587                           | 2633 | 108 | 71.02% | 11.518<br>84 | 89  | 74.90% | 9.503<br>012 | Parp3             |
| 105171                           | 4102 | 108 | 64.94% | 7.3937<br>34 | 52  | 41.10% | 3.563<br>935 | Arrdc3            |

|                              |      |     |        |              |     |        |              |         |
|------------------------------|------|-----|--------|--------------|-----|--------|--------------|---------|
| 72656                        | 4676 | 108 | 47.20% | 6.4861<br>2  | 71  | 38.20% | 4.268<br>802 | Ints8   |
| 24100                        | 1829 | 108 | 81.03% | 16.582<br>34 | 70  | 71.51% | 10.75<br>986 | Tpra1   |
| 70616                        | 2287 | 108 | 89.02% | 13.261<br>52 | 95  | 77%    | 11.67<br>83  | Sugp1   |
| 59052                        | 1850 | 108 | 73.51% | 16.394<br>11 | 88  | 65.14% | 13.37<br>313 | Mettl9  |
| 231050                       | 2541 | 108 | 75.32% | 11.935<br>89 | 83  | 73.48% | 9.183<br>232 | Galnt11 |
| 213464                       | 3632 | 108 | 75.25% | 8.3505<br>22 | 61  | 51.79% | 4.721<br>784 | Rbbp5   |
| 29813                        | 2320 | 108 | 80.47% | 13.072<br>89 | 112 | 79.70% | 13.57<br>226 | Zfp385a |
| 103711                       | 2048 | 108 | 79.49% | 14.809<br>13 | 73  | 68.70% | 10.02<br>109 | Pnpo    |
| 74375                        | 4138 | 108 | 65.06% | 7.3294<br>09 | 102 | 61.09% | 6.929<br>977 | Gcc1    |
| 56275                        | 2809 | 108 | 81.38% | 10.797<br>11 | 113 | 83.91% | 11.30<br>964 | Rbm14   |
| 70052                        | 5237 | 108 | 54.55% | 5.7913<br>11 | 69  | 41.13% | 3.704<br>151 | Prpf4   |
| 14468                        | 2820 | 108 | 58.40% | 10.755       | 165 | 67.06% | 16.44<br>966 | Gbp1    |
| 67391                        | 3261 | 108 | 51.30% | 9.3005<br>51 | 114 | 57.41% | 9.828<br>249 | Fundc2  |
| 268656                       | 2601 | 108 | 78.74% | 11.660<br>55 | 85  | 74.82% | 9.187<br>571 | Sptlc1  |
| 268973                       | 3838 | 108 | 70.40% | 7.9023<br>18 | 82  | 62.22% | 6.006<br>632 | Nlrc4   |
| 53317                        | 1771 | 108 | 91.87% | 17.125<br>41 | 111 | 93.05% | 17.62<br>084 | Plrg1   |
| 264064                       | 2586 | 108 | 60.56% | 11.728<br>19 | 85  | 59.32% | 9.240<br>863 | Cdk8    |
| gi 133892449 ref NM_201256.3 | 741  | 108 | 75.30% | 40.929<br>95 | 112 | 73.55% | 42.49<br>344 | -       |
| 70998                        | 4385 | 108 | 67.25% | 6.9165<br>56 | 78  | 54.21% | 5.000<br>888 | Phf6    |
| 66270                        | 3164 | 108 | 73.51% | 9.5856<br>81 | 96  | 59.86% | 8.530<br>154 | Fam134b |
| 98710                        | 2005 | 108 | 87.18% | 15.126<br>73 | 79  | 78.05% | 11.07<br>732 | Rabif   |
| 30935                        | 3268 | 108 | 61.23% | 9.2806<br>29 | 116 | 60.10% | 9.979<br>254 | Tor3a   |

|                              |      |     |        |              |     |        |              |                   |
|------------------------------|------|-----|--------|--------------|-----|--------|--------------|-------------------|
| 107094                       | 4344 | 107 | 61.14% | 6.9171<br>89 | 52  | 38.35% | 3.365<br>392 | Rrp12             |
| 52513                        | 3287 | 107 | 57.99% | 9.1415<br>49 | 80  | 45.39% | 6.842<br>462 | Ddx56             |
| 231452                       | 5020 | 107 | 46%    | 5.9857<br>11 | 111 | 51.71% | 6.216<br>435 | Sdad1             |
| 67991                        | 6893 | 107 | 45.54% | 4.3592<br>44 | 95  | 43.09% | 3.874<br>694 | Nacc2             |
| 66290                        | 1109 | 107 | 56.99% | 27.094<br>92 | 118 | 57.80% | 29.91<br>387 | Atp6v1g<br>1      |
| 329506                       | 4545 | 107 | 53%    | 6.6112<br>81 | 66  | 41.36% | 4.082<br>556 | Ctdspl2           |
| 77113                        | 3040 | 107 | 77.01% | 9.8843       | 85  | 67.20% | 7.860<br>813 | Klhl2             |
| 53608                        | 4333 | 107 | 58.48% | 6.9347<br>5  | 202 | 72.84% | 13.10<br>644 | Map3k6            |
| 142682                       | 6476 | 107 | 49.54% | 4.6399<br>43 | 87  | 45.20% | 3.776<br>892 | Zcchc14           |
| 102436                       | 3881 | 107 | 32.78% | 7.7424<br>04 | 34  | 16.83% | 2.462<br>96  | Lars2             |
| 66622                        | 3247 | 107 | 69.02% | 9.2541<br>64 | 66  | 62.64% | 5.714<br>573 | Ubr7              |
| 56812                        | 3067 | 107 | 71.73% | 9.7972<br>84 | 103 | 62.63% | 9.441<br>599 | Dnajb2            |
| 99650                        | 1613 | 107 | 78.49% | 18.628<br>81 | 80  | 68.69% | 13.94<br>369 | 4933434<br>E20Rik |
| gi 149264789 ref XR_031725.1 | 977  | 107 | 77.28% | 30.755<br>65 | 118 | 70.42% | 33.95<br>546 | -                 |
| 76681                        | 1553 | 107 | 61.30% | 19.348<br>53 | 70  | 56.54% | 12.67<br>21  | Trim12a           |
| 19024                        | 3850 | 107 | 45.95% | 7.8047<br>46 | 80  | 42.70% | 5.841<br>863 | Ppfbp2            |
| 217379                       | 2511 | 107 | 73.44% | 11.966<br>66 | 68  | 58.06% | 7.613<br>499 | Ubxn2a            |
| 320770                       | 5410 | 107 | 52.92% | 5.5542<br>09 | 150 | 57.34% | 7.795        | A630072<br>M18Rik |
| 320150                       | 4563 | 107 | 59.54% | 6.5852<br>01 | 82  | 54%    | 5.052<br>258 | Zdhc17            |
| 14368                        | 4090 | 107 | 67.85% | 7.3467<br>66 | 49  | 36.50% | 3.368<br>177 | Fzd6              |
| 20615                        | 1916 | 107 | 69.83% | 15.682<br>81 | 94  | 68.16% | 13.79<br>286 | Snapin            |
| 68299                        | 2816 | 107 | 78.48% | 10.670<br>55 | 81  | 61.33% | 8.086<br>759 | Vps53             |

|                              |      |     |        |              |     |        |              |               |
|------------------------------|------|-----|--------|--------------|-----|--------|--------------|---------------|
| 68718                        | 1783 | 107 | 82%    | 16.852<br>65 | 90  | 82.56% | 14.19<br>101 | Rnf166        |
| 228410                       | 2852 | 107 | 68.90% | 10.535<br>86 | 107 | 72.93% | 10.54<br>767 | Cstf3         |
| 12458                        | 1769 | 106 | 77.90% | 16.827<br>27 | 39  | 60.32% | 6.198<br>104 | Ccr6          |
| 69072                        | 2960 | 106 | 49.22% | 10.056<br>57 | 90  | 42.47% | 8.548<br>165 | Ebna1bp<br>2  |
| 66988                        | 2267 | 106 | 74.68% | 13.130<br>77 | 92  | 79%    | 11.40<br>928 | Lap3          |
| 269999                       | 1996 | 106 | 83.57% | 14.913<br>55 | 71  | 77.51% | 10.00<br>046 | Orai3         |
| 97484                        | 2134 | 106 | 73.76% | 13.949<br>13 | 74  | 70.71% | 9.748<br>985 | Cog8          |
| gi 118131142 ref NM_007869.2 | 1788 | 106 | 89.15% | 16.648<br>46 | 85  | 81.60% | 13.36<br>514 | -             |
| 238673                       | 3490 | 106 | 63.98% | 8.5293<br>54 | 94  | 59.74% | 7.572<br>243 | Zfp367        |
| 382867                       | 4318 | 106 | 10.86% | 6.8938<br>04 | 131 | 7.53%  | 8.529<br>249 | Zfp488        |
| 252966                       | 2945 | 106 | 69.58% | 10.107<br>79 | 70  | 54.19% | 6.682<br>437 | Cables2       |
| 28081                        | 2635 | 106 | 65.24% | 11.296<br>94 | 95  | 63.42% | 10.13<br>597 | D11Wsu<br>99e |
| gi 118130853 ref NM_013726.2 | 2292 | 106 | 77.57% | 12.987<br>54 | 72  | 70.94% | 8.831<br>612 | -             |
| 108911                       | 3790 | 106 | 25.59% | 7.8542<br>07 | 94  | 24.38% | 6.972<br>857 | Rcc2          |
| 104943                       | 2684 | 106 | 40.69% | 11.090<br>7  | 17  | 23.36% | 1.780<br>691 | Fam110c       |
| 11907                        | 4727 | 106 | 61.39% | 6.2973<br>23 | 78  | 50.03% | 4.639<br>072 | Atel          |
| 11793                        | 2352 | 106 | 77%    | 12.656<br>23 | 84  | 78.23% | 10.04<br>07  | Atg5          |
| 76793                        | 2344 | 106 | 83.06% | 12.699<br>42 | 93  | 76.62% | 11.15<br>443 | Snip1         |
| 17991                        | 529  | 106 | 92.06% | 56.271<br>16 | 127 | 90.55% | 67.49<br>478 | Ndufa2        |
| 243853                       | 2817 | 106 | 68.73% | 10.567<br>07 | 103 | 71.28% | 10.27<br>951 | Fkrp          |
| 101994                       | 4016 | 106 | 63.22% | 7.4122<br>13 | 66  | 51.92% | 4.620<br>323 | Zfp828        |
| 226090                       | 5394 | 106 | 51.69% | 5.5186<br>22 | 100 | 44.83% | 5.212<br>081 | Ermp1         |

|                              |       |     |        |              |     |        |              |                   |
|------------------------------|-------|-----|--------|--------------|-----|--------|--------------|-------------------|
| 76497                        | 1696  | 106 | 74.17% | 17.551<br>56 | 115 | 76.89% | 19.06<br>313 | Ppp1r11           |
| 54667                        | 5705  | 106 | 54.13% | 5.2177<br>82 | 53  | 29.71% | 2.611<br>815 | Atp8b2            |
| 13481                        | 877   | 105 | 97.49% | 33.622<br>14 | 108 | 92.47% | 34.62<br>153 | Dpm2              |
| 433864                       | 3542  | 105 | 65.56% | 8.3248<br>51 | 107 | 66.29% | 8.492<br>926 | Nom1              |
| 73674                        | 2612  | 105 | 85.57% | 11.288<br>91 | 92  | 70.21% | 9.902<br>316 | Wdr75             |
| 54607                        | 3210  | 105 | 52.65% | 9.1858<br>63 | 82  | 47.73% | 7.181<br>761 | Socs6             |
| 19712                        | 4266  | 105 | 71.54% | 6.9120<br>07 | 73  | 52.93% | 4.810<br>876 | Rest              |
| 219158                       | 3705  | 105 | 64.40% | 7.9586<br>02 | 58  | 46.13% | 4.401<br>107 | 2610301<br>G19Rik |
| 67894                        | 2366  | 105 | 81.02% | 12.462<br>65 | 69  | 63.52% | 8.198<br>917 | Fam45a            |
| 69080                        | 1528  | 105 | 90.90% | 19.297<br>53 | 117 | 83.97% | 21.52<br>706 | Gmppa             |
| 68275                        | 3121  | 105 | 66.68% | 9.4478<br>12 | 79  | 59.56% | 7.116<br>32  | Rpa1              |
| 56451                        | 1407  | 105 | 83.08% | 20.957<br>09 | 88  | 79.53% | 17.58<br>372 | Suclg1            |
| 18181                        | 3587  | 105 | 65.77% | 8.2204<br>13 | 86  | 58.66% | 6.740<br>455 | Nrf1              |
| 12156                        | 2540  | 105 | 79.69% | 11.608<br>91 | 160 | 87.48% | 17.70<br>958 | Bmp2              |
| 73137                        | 4801  | 105 | 57.76% | 6.1417<br>67 | 74  | 37.80% | 4.333<br>334 | Prrc1             |
| 11920                        | 11964 | 105 | 29.86% | 2.4646<br>12 | 49  | 15.99% | 1.151<br>441 | Atm               |
| 67422                        | 3110  | 105 | 76.91% | 9.4812<br>29 | 89  | 67.17% | 8.045<br>476 | Dhdds             |
| 71918                        | 4375  | 105 | 60.18% | 6.7397<br>99 | 94  | 54.74% | 6.040<br>486 | Zcchc24           |
| 16184                        | 4428  | 105 | 61.18% | 6.6591<br>29 | 81  | 49.62% | 5.142<br>799 | Il2ra             |
| 211948                       | 3551  | 105 | 64.97% | 8.3037<br>51 | 133 | 69.95% | 10.52<br>987 | Pde12             |
| gi 118130684 ref NM_023871.3 | 1852  | 105 | 33.80% | 15.921<br>5  | 94  | 32.94% | 14.26<br>951 | -                 |
| 100604                       | 2829  | 105 | 71.93% | 10.422<br>98 | 75  | 65.82% | 7.453<br>331 | Lrrc8c            |



|                                 |      |     |        |              |     |        |              |              |
|---------------------------------|------|-----|--------|--------------|-----|--------|--------------|--------------|
| 67126                           | 419  | 105 | 89.02% | 70.373<br>8  | 122 | 86.87% | 81.85<br>928 | Atp5e        |
| 74158                           | 3394 | 105 | 51.03% | 8.6878<br>67 | 76  | 50.29% | 6.295<br>408 | Josd1        |
| 234825                          | 2083 | 105 | 84.59% | 14.155<br>84 | 69  | 73.60% | 9.312<br>836 | Klhdc4       |
| 16010                           | 2069 | 105 | 79.22% | 14.251<br>63 | 69  | 65.68% | 9.375<br>851 | Igfbp4       |
| 76332                           | 2839 | 105 | 74.78% | 10.386<br>27 | 91  | 69.36% | 9.011<br>521 | Cog2         |
| 105847                          | 2906 | 105 | 73.61% | 10.146<br>81 | 108 | 71.61% | 10.44<br>841 | Lmf2         |
| 69008                           | 3037 | 105 | 77.84% | 9.7091<br>28 | 96  | 73.56% | 8.886<br>865 | Cab391       |
| 19280                           | 6874 | 105 | 46.77% | 4.2895<br>87 | 68  | 31.64% | 2.781<br>131 | Ptprs        |
| 103724                          | 1929 | 105 | 85.43% | 15.285<br>96 | 128 | 88.49% | 18.65<br>52  | Tbc1d10<br>a |
| 78887                           | 4025 | 105 | 57.76% | 7.3258<br>69 | 68  | 39.45% | 4.749<br>689 | Sfi1         |
| 69091                           | 6890 | 105 | 43.58% | 4.2796<br>26 | 82  | 36.27% | 3.345<br>929 | Vps26b       |
| 209011                          | 1715 | 104 | 89.10% | 17.029<br>62 | 129 | 92.77% | 21.14<br>695 | Sirt7        |
| 70470                           | 3320 | 104 | 71.20% | 8.7969<br>27 | 79  | 51.57% | 6.689<br>769 | Rprd1b       |
| 57874                           | 2738 | 104 | 75.20% | 10.666<br>84 | 115 | 67.42% | 11.80<br>828 | Ptplad1      |
| 246696                          | 1569 | 104 | 75.14% | 18.614<br>27 | 141 | 80.18% | 25.26<br>494 | Slc25a28     |
| 67897                           | 5018 | 104 | 50.28% | 5.8202<br>06 | 101 | 52.37% | 5.658<br>65  | Rnmt         |
| 112405                          | 3524 | 104 | 64.53% | 8.2876<br>83 | 107 | 63%    | 8.536<br>306 | Egln1        |
| gi 27754068 ref N<br>M_026407.2 | 2065 | 104 | 78.98% | 14.143<br>24 | 126 | 86.49% | 17.15<br>428 | -            |
| 235469                          | 4374 | 104 | 59.58% | 6.6771<br>37 | 48  | 34.71% | 3.085<br>209 | Zfp280d      |
| 320080                          | 5970 | 104 | 56.80% | 4.8920<br>93 | 70  | 35.85% | 3.296<br>445 | Zbtb39       |
| 224045                          | 2556 | 104 | 74.57% | 11.426<br>37 | 106 | 74.22% | 11.65<br>916 | Eif2b5       |
| 18806                           | 3801 | 104 | 69.09% | 7.6837<br>14 | 87  | 59.06% | 6.434<br>925 | Pld2         |

|                              |      |     |        |              |     |        |              |                   |
|------------------------------|------|-----|--------|--------------|-----|--------|--------------|-------------------|
| 233805                       | 5637 | 104 | 52.44% | 5.1810<br>89 | 70  | 44.15% | 3.491<br>179 | Dcun1d3           |
| 217340                       | 4655 | 104 | 62.79% | 6.2740<br>7  | 60  | 42.66% | 3.623<br>712 | Rnf157            |
| 211329                       | 5134 | 104 | 61.20% | 5.6887<br>02 | 91  | 45.40% | 4.983<br>192 | Ncoa7             |
| 14702                        | 3826 | 104 | 63.20% | 7.6335<br>07 | 43  | 41.45% | 3.159<br>698 | Gng2              |
| 50783                        | 953  | 104 | 79.33% | 30.646<br>17 | 116 | 83.21% | 34.22<br>057 | Lsm4              |
| 66875                        | 3668 | 104 | 66.77% | 7.9623<br>22 | 89  | 62.32% | 6.821<br>546 | Swt1              |
| 27886                        | 2836 | 104 | 73.10% | 10.298<br>24 | 84  | 63.72% | 8.327<br>127 | Dgcr14            |
| 56805                        | 5122 | 104 | 52.32% | 5.7020<br>3  | 92  | 45.53% | 5.049<br>756 | Zbtb33            |
| 13871                        | 3547 | 104 | 63.86% | 8.2339<br>43 | 88  | 59.83% | 6.974<br>99  | Ercc2             |
| 208144                       | 4235 | 104 | 58.49% | 6.8962<br>92 | 51  | 39.79% | 3.385<br>625 | Dhx37             |
| 103136                       | 2579 | 104 | 77.98% | 11.324<br>47 | 88  | 70.03% | 9.592<br>978 | Pwp1              |
| gi 116292181 ref NM_007922.4 | 3540 | 104 | 69.77% | 8.2502<br>25 | 83  | 60.42% | 6.591<br>693 | -                 |
| 76509                        | 1846 | 103 | 71.02% | 15.669       | 200 | 79.79% | 30.45<br>933 | 1600029<br>D21Rik |
| 68889                        | 2168 | 103 | 77.72% | 13.341<br>78 | 99  | 76.75% | 12.83<br>802 | Ubac2             |
| 76630                        | 1978 | 103 | 78.77% | 14.623<br>34 | 70  | 61.17% | 9.949<br>331 | Stambpl<br>1      |
| 64934                        | 2911 | 103 | 40.26% | 9.9364<br>38 | 93  | 40.40% | 8.981<br>789 | Pes1              |
| 52150                        | 4089 | 103 | 68.01% | 7.0738<br>5  | 71  | 46.69% | 4.881<br>613 | Kcnk6             |
| 74775                        | 2167 | 103 | 80.16% | 13.347<br>93 | 75  | 66.91% | 9.730<br>261 | Lmbr11            |
| 12566                        | 2432 | 103 | 70.23% | 11.893<br>49 | 60  | 56.66% | 6.936<br>011 | Cdk2              |
| 74106                        | 3306 | 103 | 73.74% | 8.7492<br>35 | 73  | 56.44% | 6.207<br>863 | Dcaf6             |
| 245857                       | 2728 | 103 | 75.40% | 10.603       | 81  | 60.78% | 8.347<br>622 | Ssh3              |
| 74778                        | 1965 | 103 | 53.23% | 14.720<br>09 | 92  | 49.01% | 13.16<br>277 | Rrp7a             |

|                                 |      |     |        |              |     |        |              |                   |
|---------------------------------|------|-----|--------|--------------|-----|--------|--------------|-------------------|
| 319675                          | 7380 | 103 | 43.20% | 3.9193<br>73 | 57  | 28.40% | 2.171<br>404 | 5830418<br>K08Rik |
| 241311                          | 6602 | 103 | 49.42% | 4.3812<br>44 | 80  | 35.76% | 3.406<br>721 | Zbtb34            |
| gi 124486842 ref NM_001081354.1 | 3352 | 103 | 72.08% | 8.6291<br>68 | 109 | 79.59% | 9.142<br>071 | -                 |
| 228769                          | 3542 | 103 | 54.38% | 8.1662<br>82 | 71  | 47.29% | 5.635<br>493 | Psmf1             |
| 102607                          | 5541 | 103 | 50.73% | 5.2201<br>72 | 54  | 28.91% | 2.739<br>856 | Snx19             |
| 319740                          | 5636 | 103 | 52.24% | 5.1321<br>81 | 77  | 42.71% | 3.840<br>978 | Zfyve27           |
| 12445                           | 2131 | 103 | 63.26% | 13.573<br>43 | 92  | 63.63% | 12.13<br>742 | Ccnd3             |
| 78266                           | 4632 | 103 | 62.07% | 6.2445<br>97 | 82  | 43.80% | 4.976<br>997 | Zfp687            |
| gi 149268622 ref XR_033816.1    | 2934 | 103 | 61.76% | 9.8585<br>45 | 82  | 55.11% | 7.857<br>346 | -                 |
| 226744                          | 4568 | 103 | 61.41% | 6.3320<br>87 | 85  | 50.39% | 5.231<br>364 | Cnst              |
| 20304                           | 579  | 103 | 89.64% | 49.956<br>77 | 161 | 89.64% | 78.17<br>528 | Ccl5              |
| 22594                           | 2155 | 103 | 78.05% | 13.422<br>26 | 89  | 71.55% | 11.61<br>087 | Xrcc1             |
| 110639                          | 3638 | 103 | 69.90% | 7.9507<br>89 | 69  | 55.88% | 5.332<br>226 | Prps2             |
| 103199                          | 3278 | 103 | 69.68% | 8.8239<br>69 | 90  | 64.67% | 7.718<br>905 | Fig4              |
| 233210                          | 6879 | 103 | 45.66% | 4.2048<br>22 | 34  | 20.82% | 1.389<br>555 | Prr12             |
| 269682                          | 4833 | 103 | 57.23% | 5.9848<br>9  | 64  | 44.69% | 3.722<br>934 | Golga3            |
| 628308                          | 4664 | 103 | 21.31% | 6.2017<br>52 | 73  | 17.26% | 4.400<br>342 | Gm1442<br>0       |
| 11364                           | 1845 | 102 | 81.36% | 15.525<br>28 | 81  | 76.42% | 12.34<br>272 | Acadm             |
| 12238                           | 881  | 102 | 95.57% | 32.513<br>22 | 107 | 98.64% | 34.14<br>523 | Comm3             |
| 58523                           | 2789 | 102 | 78.56% | 10.270<br>4  | 74  | 59.88% | 7.459<br>425 | Elp2              |
| 109305                          | 1871 | 102 | 75.09% | 15.309<br>54 | 93  | 66.01% | 13.97<br>434 | Orai1             |
| 66863                           | 3108 | 102 | 70.91% | 9.2162<br>63 | 64  | 59.91% | 5.789<br>234 | Lztr1             |

|        |      |     |        |              |     |        |              |                   |
|--------|------|-----|--------|--------------|-----|--------|--------------|-------------------|
| 69551  | 3317 | 102 | 68.62% | 8.6355<br>58 | 76  | 58.82% | 6.441<br>548 | 2310022<br>B05Rik |
| 53330  | 2532 | 102 | 58.18% | 11.312<br>85 | 79  | 54.38% | 8.771<br>735 | Vamp4             |
| 94223  | 4226 | 102 | 62.90% | 6.7780<br>75 | 63  | 48.18% | 4.191<br>15  | Dgcr8             |
| 100910 | 3730 | 102 | 60.29% | 7.6793<br>96 | 86  | 55.20% | 6.482<br>04  | Chpf2             |
| 71683  | 2198 | 102 | 82.39% | 13.031<br>91 | 55  | 66.29% | 7.034<br>887 | Gypc              |
| 107829 | 2235 | 102 | 81.97% | 12.816<br>17 | 83  | 74.27% | 10.44<br>053 | Thoc5             |
| 13494  | 1524 | 102 | 85.56% | 18.795<br>37 | 89  | 83.33% | 16.41<br>826 | Drg1              |
| 84113  | 1897 | 102 | 81.66% | 15.099<br>71 | 94  | 78.07% | 13.93<br>101 | Ptov1             |
| 21951  | 6444 | 102 | 52.79% | 4.4450<br>88 | 61  | 37.14% | 2.661<br>316 | Tnks              |
| 19057  | 1948 | 102 | 77.10% | 14.704<br>39 | 82  | 65.81% | 11.83<br>442 | Ppp3cc            |
| 56698  | 1893 | 102 | 64.71% | 15.131<br>61 | 129 | 70.52% | 19.15<br>849 | Phax              |
| 18744  | 2700 | 102 | 73.26% | 10.608<br>94 | 76  | 61.52% | 7.913<br>561 | Pja1              |
| 20935  | 2593 | 102 | 80.14% | 11.046<br>72 | 93  | 79.83% | 10.08<br>33  | Surf6             |
| 227210 | 2940 | 102 | 41.50% | 9.7429<br>07 | 135 | 41.12% | 12.90<br>947 | Ccnyl1            |
| 210982 | 6579 | 102 | 45.43% | 4.3538<br>75 | 54  | 32.60% | 2.307<br>576 | BC0322<br>03      |
| 52874  | 3462 | 102 | 57.13% | 8.2738<br>72 | 67  | 39.77% | 5.440<br>889 | D19Bwg<br>1357e   |
| 102339 | 2754 | 102 | 79.30% | 10.400<br>92 | 91  | 66.59% | 9.289<br>655 | Cog4              |
| 23874  | 2132 | 102 | 75.28% | 13.435<br>34 | 87  | 69.28% | 11.47<br>24  | Farsb             |
| 83560  | 4776 | 102 | 55.84% | 5.9975<br>18 | 85  | 44.30% | 5.003<br>533 | Tex14             |
| 15500  | 2623 | 102 | 71.33% | 10.920<br>38 | 106 | 72.70% | 11.36<br>134 | Hsf2              |
| 244879 | 7347 | 102 | 43.79% | 3.8987<br>54 | 81  | 36.12% | 3.099<br>539 | Npat              |
| 19727  | 3682 | 102 | 58.64% | 7.7795<br>07 | 78  | 53.78% | 5.955<br>702 | Rfxank            |

|                                 |      |     |        |              |     |        |              |                   |
|---------------------------------|------|-----|--------|--------------|-----|--------|--------------|-------------------|
| gi 30725846 ref N<br>M_180588.1 | 1323 | 102 | 80.73% | 21.650<br>9  | 102 | 94.78% | 21.67<br>517 | -                 |
| 99696                           | 4915 | 102 | 52.66% | 5.8279<br>04 | 89  | 47.63% | 5.090<br>83  | Ankrd50           |
| 69155                           | 2572 | 102 | 57.43% | 11.136<br>92 | 131 | 61.70% | 14.31<br>932 | 1810030<br>O07Rik |
| 13990                           | 5098 | 102 | 50.86% | 5.6187<br>03 | 66  | 38.74% | 3.639<br>705 | Smarcad<br>1      |
| 67534                           | 4341 | 102 | 66.11% | 6.5985<br>13 | 69  | 43.40% | 4.468<br>702 | Ttl4              |
| 18747                           | 2293 | 102 | 71.04% | 12.492       | 96  | 72.66% | 11.77<br>035 | Prkaca            |
| 27397                           | 6712 | 102 | 30.38% | 4.2676<br>02 | 79  | 23.41% | 3.309<br>004 | Mrpl17            |
| 224617                          | 7946 | 102 | 38.25% | 3.6048<br>51 | 65  | 28.84% | 2.299<br>783 | Tbc1d24           |
| 269614                          | 2598 | 101 | 71.71% | 10.917<br>37 | 67  | 56.43% | 7.250<br>33  | Pank4             |
| 223696                          | 1024 | 101 | 79.69% | 27.698<br>56 | 118 | 77.54% | 32.39<br>695 | Tomm22            |
| 19277                           | 6634 | 101 | 32.76% | 4.2754<br>48 | 82  | 26.03% | 3.475<br>046 | Ptpro             |
| 12772                           | 3589 | 101 | 65.17% | 7.9028<br>48 | 41  | 43.13% | 3.211<br>682 | Ccr2              |
| 225164                          | 3793 | 101 | 55.52% | 7.4778<br>07 | 49  | 42.31% | 3.631<br>912 | Mib1              |
| 217431                          | 3004 | 101 | 68.94% | 9.4418<br>51 | 96  | 64.88% | 8.984<br>49  | Nol10             |
| 68501                           | 2745 | 101 | 26.08% | 10.332<br>72 | 99  | 31.51% | 10.13<br>946 | Nsmce2            |
| 28075                           | 2945 | 101 | 66.93% | 9.6310<br>09 | 103 | 67.33% | 9.832<br>728 | Desi1             |
| 73067                           | 1140 | 101 | 82.37% | 24.880<br>11 | 90  | 85.44% | 22.19<br>524 | Tmem19<br>2       |
| 80385                           | 1661 | 101 | 81.82% | 17.076<br>05 | 77  | 81.16% | 13.03<br>296 | Tusc2             |
| 22704                           | 4637 | 101 | 57.49% | 6.1167<br>4  | 88  | 44.77% | 5.335<br>409 | Zfp46             |
| 69748                           | 2586 | 101 | 76.45% | 10.968<br>03 | 77  | 60.56% | 8.371<br>135 | Aldh16a<br>1      |
| 270086                          | 5329 | 101 | 52.94% | 5.3224<br>47 | 85  | 51.25% | 4.484<br>307 | Ogfod1            |
| 171212                          | 4725 | 101 | 60.15% | 6.0028<br>19 | 93  | 60.78% | 5.533<br>543 | Galnt10           |

|                                  |       |     |        |              |     |        |              |                   |
|----------------------------------|-------|-----|--------|--------------|-----|--------|--------------|-------------------|
| 59010                            | 1995  | 101 | 67.57% | 14.217<br>2  | 129 | 76.19% | 18.17<br>896 | Sqrdl             |
| 27027                            | 1697  | 101 | 77.61% | 16.713<br>8  | 62  | 71.48% | 10.27<br>145 | Tspan32           |
| 63913                            | 3956  | 101 | 65.37% | 7.1696<br>97 | 58  | 45.20% | 4.121<br>866 | Fam129a           |
| 66407                            | 959   | 101 | 85.71% | 29.575<br>93 | 99  | 82.38% | 29.02<br>276 | Mrps15            |
| gi 47059160 ref N<br>M_199311.1  | 1582  | 101 | 90.83% | 17.928<br>77 | 108 | 93.05% | 19.19<br>285 | -                 |
| 53333                            | 1669  | 101 | 78.37% | 16.994<br>2  | 68  | 69.26% | 11.45<br>446 | Tomm40            |
| 12409                            | 1021  | 101 | 93.73% | 27.779<br>94 | 84  | 83.84% | 23.13        | Cbr2              |
| 66536                            | 1507  | 101 | 76.84% | 18.821<br>05 | 88  | 79.69% | 16.41<br>691 | Nipsnap<br>3b     |
| 231871                           | 3257  | 101 | 73.56% | 8.7084<br>19 | 103 | 67.95% | 8.890<br>815 | Daglb             |
| 78689                            | 2646  | 101 | 71.32% | 10.719<br>32 | 80  | 68.97% | 8.500<br>065 | Naa35             |
| gi 112181184 ref N<br>M_007829.3 | 2527  | 101 | 69.92% | 11.224<br>11 | 104 | 75.43% | 11.57<br>045 | -                 |
| 230233                           | 6160  | 101 | 47.52% | 4.6044<br>35 | 60  | 26.20% | 2.738<br>373 | Ikbkap            |
| 17713                            | 3338  | 101 | 38.47% | 8.4971       | 121 | 47.99% | 10.19<br>11  | Grpe11            |
| 19342                            | 1170  | 101 | 88.55% | 24.242<br>15 | 104 | 93.42% | 24.99<br>019 | Rab4b             |
| 212123                           | 2312  | 101 | 82.53% | 12.267<br>87 | 73  | 68.25% | 8.876<br>815 | Dcaf15            |
| 68565                            | 864   | 100 | 95.02% | 32.502<br>89 | 119 | 97.80% | 38.72<br>178 | Mrps18a           |
| 58235                            | 5079  | 100 | 51.41% | 5.5291<br>39 | 80  | 48.71% | 4.428<br>268 | Pvr11             |
| 230279                           | 3630  | 100 | 63.06% | 7.7362<br>25 | 74  | 49.50% | 5.731<br>222 | 6330416<br>G13Rik |
| 67781                            | 1973  | 100 | 73.29% | 14.233<br>4  | 98  | 72.88% | 13.96<br>436 | Ilf2              |
| 70925                            | 3494  | 100 | 63.97% | 8.0373<br>49 | 69  | 47.25% | 5.551<br>985 | Cdkn2ai<br>p      |
| 66218                            | 651   | 100 | 98.92% | 43.137<br>48 | 122 | 98.16% | 52.68<br>67  | Ndufb9            |
| 20744                            | 16348 | 100 | 22.16% | 1.7177<br>94 | 57  | 13%    | 0.980<br>24  | Strbp             |

|                              |      |     |        |              |     |        |              |              |
|------------------------------|------|-----|--------|--------------|-----|--------|--------------|--------------|
| gi 198278500 ref NM_027879.1 | 2094 | 100 | 87.11% | 13.410<br>93 | 66  | 72.16% | 8.861<br>135 | -            |
| 67763                        | 1868 | 100 | 87.63% | 15.033<br>46 | 110 | 84.58% | 16.55<br>533 | Prpsap1      |
| 226139                       | 4798 | 100 | 51.81% | 5.8529<br>59 | 108 | 45.02% | 6.328<br>279 | Cox15        |
| 329777                       | 4885 | 100 | 52.08% | 5.7487<br>2  | 93  | 51.93% | 5.352<br>301 | Pigk         |
| 66309                        | 1085 | 100 | 80.46% | 25.882<br>49 | 107 | 90.78% | 27.72<br>529 | Tmem12<br>8  |
| 215210                       | 1278 | 100 | 88.34% | 21.973<br>78 | 120 | 94.13% | 26.39<br>809 | Tmem12<br>0a |
| 19360                        | 5153 | 100 | 55.50% | 5.4497<br>37 | 82  | 44.58% | 4.473<br>792 | Rad50        |
| 67179                        | 2228 | 100 | 80.48% | 12.604<br>35 | 75  | 77.42% | 9.463<br>858 | Ccdc25       |
| 68032                        | 975  | 100 | 85.33% | 28.802<br>56 | 84  | 84.72% | 24.22<br>126 | Emc4         |
| 105513                       | 2706 | 100 | 76.72% | 10.377<br>86 | 89  | 71.40% | 9.246<br>648 | Chmp7        |
| 237107                       | 4877 | 100 | 56.63% | 5.7581<br>5  | 83  | 51.22% | 4.784<br>62  | Gnl3l        |
| 80910                        | 1611 | 100 | 91.68% | 17.431<br>72 | 219 | 95.72% | 38.21<br>824 | Gpr84        |
| 666183                       | 2325 | 100 | 32%    | 12.078<br>49 | 91  | 30.11% | 11.00<br>375 | Gm7968       |
| 74747                        | 1685 | 100 | 87.48% | 16.666<br>17 | 121 | 83.50% | 20.18<br>866 | Ddit4        |
| 75420                        | 2913 | 100 | 76.14% | 9.6404<br>04 | 52  | 51.01% | 5.018<br>628 | Secisbp2     |
| 56424                        | 1672 | 100 | 56.52% | 16.795<br>75 | 76  | 52.81% | 12.77<br>908 | Stub1        |
| 26427                        | 2284 | 100 | 84.33% | 12.295<br>31 | 114 | 78.72% | 14.03<br>236 | Creb3l1      |
| gi 146135063 ref NM_026270.3 | 1578 | 100 | 79.21% | 17.796<br>26 | 71  | 78.96% | 12.64<br>95  | -            |
| 66866                        | 3934 | 100 | 62.84% | 7.1384<br>08 | 84  | 53.58% | 6.002<br>982 | Nhlrc2       |
| 68203                        | 4348 | 100 | 63.66% | 6.4587<br>16 | 39  | 38.41% | 2.521<br>722 | Diras2       |
| 19729                        | 1031 | 100 | 86.52% | 27.238<br>11 | 86  | 89.72% | 23.45<br>103 | Slc50a1      |
| 52864                        | 5709 | 100 | 51.06% | 4.9189<br>87 | 59  | 33.47% | 2.905<br>455 | Slx4         |

|                              |      |     |        |              |     |        |              |                   |
|------------------------------|------|-----|--------|--------------|-----|--------|--------------|-------------------|
| 66867                        | 3562 | 100 | 64.54% | 7.8839<br>12 | 86  | 58.79% | 6.787<br>763 | Hmg20a            |
| 16188                        | 1394 | 99  | 88.52% | 19.943<br>81 | 83  | 89.74% | 16.73<br>931 | Il3ra             |
| 56468                        | 4460 | 99  | 57.33% | 6.2335<br>59 | 97  | 58.70% | 6.114<br>472 | Socs5             |
| 67895                        | 1292 | 99  | 93.96% | 21.518<br>32 | 84  | 84.06% | 18.27<br>843 | Ppa1              |
| 66586                        | 1939 | 99  | 69.31% | 14.338<br>15 | 119 | 70.96% | 17.25<br>406 | Crls1             |
| 66990                        | 1517 | 99  | 82.79% | 18.326<br>74 | 91  | 76.60% | 16.86<br>467 | Tmem13<br>4       |
| 70012                        | 3878 | 99  | 66.94% | 7.1690<br>75 | 87  | 61.40% | 6.307<br>156 | Ccdc21            |
| 269424                       | 5584 | 99  | 49.91% | 4.9788<br>09 | 46  | 28.24% | 2.315<br>979 | Phf17             |
| 68212                        | 808  | 99  | 97.28% | 34.408<br>01 | 151 | 91.71% | 52.53<br>971 | Tmbim4            |
| 107071                       | 1220 | 99  | 94.02% | 22.788<br>26 | 97  | 88.20% | 22.35<br>291 | Wdr74             |
| gi 133892380 ref NM_029759.3 | 1836 | 99  | 84.97% | 15.142<br>52 | 104 | 93.14% | 15.92<br>512 | -                 |
| 226122                       | 1527 | 99  | 87.75% | 18.206<br>73 | 130 | 93.52% | 23.93<br>461 | Ubt1              |
| 17216                        | 3381 | 99  | 68.38% | 8.2229<br>14 | 60  | 50.40% | 4.989<br>169 | Mcm2              |
| 20286                        | 5958 | 99  | 45.87% | 4.6662<br>76 | 100 | 45.20% | 4.718<br>692 | Zc3h7b            |
| 50529                        | 1354 | 99  | 83.31% | 20.532<br>99 | 67  | 73.12% | 13.91<br>164 | Mrps7             |
| 235493                       | 4355 | 99  | 56.76% | 6.3838<br>51 | 48  | 34.19% | 3.098<br>669 | BC0313<br>53      |
| 66201                        | 1343 | 99  | 91.29% | 20.701<br>17 | 102 | 82.50% | 21.35<br>238 | Vta1              |
| 214764                       | 5338 | 99  | 56.73% | 5.2082<br>56 | 54  | 35.24% | 2.844<br>051 | 2700050<br>L05Rik |
| 67898                        | 1551 | 99  | 87.30% | 17.925       | 76  | 79.30% | 13.77<br>602 | Pef1              |
| 75734                        | 1920 | 99  | 63.65% | 14.480<br>04 | 84  | 57.34% | 12.29<br>986 | Mff               |
| 110842                       | 1464 | 99  | 68.17% | 18.990<br>21 | 90  | 63.87% | 17.28<br>318 | Etfa              |
| 242406                       | 5868 | 99  | 52.01% | 4.7378<br>44 | 68  | 38.60% | 3.257<br>924 | Rgp1              |



|                              |      |    |        |              |     |        |              |          |
|------------------------------|------|----|--------|--------------|-----|--------|--------------|----------|
| 20841                        | 3013 | 99 | 75.24% | 9.2272<br>39 | 102 | 77.63% | 9.517<br>506 | Zfp143   |
| 72672                        | 6840 | 99 | 47.82% | 4.0645<br>72 | 49  | 27.75% | 2.014<br>012 | Zfp518a  |
| 71371                        | 4494 | 99 | 29.62% | 6.1863<br>98 | 59  | 25.06% | 3.690<br>975 | Arid5b   |
| gi 133892201 ref NM_021295.2 | 4270 | 99 | 43.21% | 6.5109<br>3  | 104 | 45.43% | 6.847<br>43  | -        |
| 66089                        | 1946 | 99 | 81.04% | 14.286<br>57 | 67  | 59.40% | 9.679<br>526 | Rmnd5b   |
| 67811                        | 1951 | 99 | 74.78% | 14.249<br>96 | 84  | 84.73% | 12.10<br>442 | Poldip2  |
| 216080                       | 1448 | 99 | 89.64% | 19.200<br>05 | 75  | 82.18% | 14.56<br>179 | Ube2d1   |
| 109077                       | 3294 | 99 | 69.55% | 8.4400<br>95 | 89  | 63.39% | 7.596<br>062 | Ints5    |
| 14151                        | 2901 | 99 | 70.04% | 9.5834<br>79 | 87  | 61.12% | 8.431<br>283 | Fech     |
| 13807                        | 2656 | 99 | 68.41% | 10.467<br>5  | 64  | 57.19% | 6.774<br>45  | Eno2     |
| 381629                       | 1006 | 99 | 86.98% | 27.635<br>86 | 108 | 95.43% | 30.18<br>199 | Atraid   |
| 68479                        | 1648 | 99 | 52.18% | 16.869<br>95 | 103 | 51.46% | 17.57<br>123 | Phf5a    |
| 13495                        | 1713 | 98 | 84.35% | 16.065<br>88 | 73  | 90.13% | 11.98<br>085 | Drg2     |
| 19769                        | 2538 | 98 | 52.09% | 10.843<br>52 | 88  | 54.93% | 9.747<br>947 | Rit1     |
| 232784                       | 2722 | 98 | 75.53% | 10.110<br>52 | 55  | 57.83% | 5.680<br>632 | Zfp212   |
| 78830                        | 2924 | 98 | 72.40% | 9.4120<br>54 | 102 | 75.68% | 9.807<br>197 | Slc25a12 |
| 68911                        | 2911 | 98 | 66.06% | 9.4540<br>87 | 93  | 72.31% | 8.981<br>789 | Pygo2    |
| 268566                       | 3316 | 98 | 71.83% | 8.2994<br>11 | 86  | 58.50% | 7.291<br>318 | Gphn     |
| 76737                        | 1364 | 98 | 84.60% | 20.176<br>57 | 98  | 78.37% | 20.19<br>918 | Creld2   |
| 22376                        | 2094 | 98 | 43.46% | 13.142<br>72 | 85  | 40.88% | 11.41<br>207 | Was      |
| 68473                        | 3171 | 98 | 71.93% | 8.6789<br>17 | 67  | 61.31% | 5.940<br>195 | Mob1b    |
| 14782                        | 2692 | 98 | 42.90% | 10.223<br>2  | 108 | 43.31% | 11.27<br>901 | Gsr      |

|                                     |      |    |        |              |     |        |              |              |
|-------------------------------------|------|----|--------|--------------|-----|--------|--------------|--------------|
| 68140                               | 3007 | 98 | 80.41% | 9.1522<br>6  | 69  | 59.76% | 6.451<br>16  | Tigd2        |
| 52123                               | 3829 | 98 | 46.96% | 7.1874<br>76 | 73  | 47.14% | 5.359<br>936 | Agpat5       |
| 19009                               | 4575 | 98 | 61.33% | 6.0154<br>86 | 47  | 32.26% | 2.888<br>211 | Pou6f1       |
| 382030                              | 1832 | 98 | 84.12% | 15.022<br>3  | 102 | 80.24% | 15.65<br>297 | Tmem18<br>8  |
| 70110                               | 1360 | 98 | 88.38% | 20.235<br>92 | 81  | 85.44% | 16.74<br>435 | Ifi35        |
| 218832                              | 4683 | 98 | 62.01% | 5.8767<br>56 | 73  | 48.05% | 4.382<br>489 | Polr3a       |
| 224650                              | 5647 | 98 | 48.91% | 4.8735<br>34 | 84  | 44.73% | 4.181<br>996 | Anks1        |
| 29871                               | 3394 | 98 | 68.44% | 8.1086<br>76 | 87  | 64.67% | 7.206<br>585 | Scmh1        |
| 68134                               | 2188 | 98 | 86.33% | 12.578<br>08 | 99  | 81.44% | 12.72<br>067 | Upf3b        |
| 668139                              | 7965 | 98 | 6.98%  | 3.4552<br>22 | 108 | 6.21%  | 3.812<br>063 | Gm8995       |
| 240255                              | 6299 | 98 | 43.10% | 4.3690<br>82 | 75  | 38.32% | 3.347<br>432 | Ythdc2       |
| 224648                              | 8567 | 98 | 38.02% | 3.2124<br>25 | 75  | 32.36% | 2.461<br>244 | Uhrf1bp<br>1 |
| 12913                               | 1582 | 98 | 83.06% | 17.396<br>24 | 94  | 82.93% | 16.70<br>489 | Creb3        |
| 59014                               | 2058 | 98 | 76.68% | 13.372<br>62 | 98  | 74.10% | 13.38<br>76  | Rrs1         |
| 13449                               | 1717 | 98 | 89.87% | 16.028<br>45 | 97  | 94.76% | 15.88<br>267 | Dok2         |
| 19139                               | 1998 | 98 | 78.58% | 13.774<br>2  | 88  | 83.63% | 12.38<br>253 | Prps1        |
| gi 149251797 ref X<br>M_001477795.1 | 344  | 98 | 22.09% | 80.002<br>46 | 116 | 20.06% | 94.80<br>291 | -            |
| 27354                               | 2491 | 98 | 75.87% | 11.048<br>11 | 130 | 76.64% | 14.67<br>208 | Nbn          |
| 72542                               | 2079 | 98 | 77.78% | 13.237<br>54 | 77  | 64.69% | 10.41<br>258 | Pgam5        |
| 19299                               | 3399 | 98 | 69.37% | 8.0967<br>48 | 63  | 52.37% | 5.210<br>885 | Abcd3        |
| 70044                               | 2764 | 98 | 76.01% | 9.9568<br>91 | 60  | 61.40% | 6.102<br>887 | Tut1         |
| 19338                               | 3488 | 98 | 61.10% | 7.8901<br>51 | 89  | 61.30% | 7.173<br>575 | Rab33b       |

|                                 |      |    |        |              |     |        |              |                   |
|---------------------------------|------|----|--------|--------------|-----|--------|--------------|-------------------|
| 20585                           | 4955 | 98 | 54.73% | 5.5541<br>57 | 66  | 41.68% | 3.744<br>746 | Hltf              |
| 338359                          | 2436 | 98 | 79.02% | 11.297<br>56 | 99  | 75.82% | 11.42<br>563 | Supv311           |
| 52690                           | 2725 | 98 | 60.29% | 10.099<br>39 | 100 | 61.91% | 10.31<br>705 | Setd3             |
| 18797                           | 4195 | 98 | 63.36% | 6.5603<br>92 | 73  | 56.54% | 4.892<br>299 | Plcb3             |
| 75425                           | 3798 | 98 | 56.58% | 7.2461<br>42 | 61  | 35.49% | 4.515<br>408 | Tti1              |
| 381038                          | 1323 | 98 | 89.72% | 20.801<br>85 | 101 | 85.94% | 21.46<br>267 | Parl              |
| 234366                          | 5208 | 97 | 15%    | 5.2304<br>19 | 89  | 15.75% | 4.804<br>422 | Gatad2a           |
| 75725                           | 7436 | 97 | 29.77% | 3.6632<br>63 | 114 | 33.97% | 4.310<br>102 | Phf14             |
| 52855                           | 3512 | 97 | 65.23% | 7.7562<br>7  | 78  | 59.23% | 6.243<br>99  | Lair1             |
| gi 22779863 ref N<br>M_026772.1 | 1466 | 97 | 92.77% | 18.581<br>19 | 223 | 95.57% | 42.76<br>545 | -                 |
| 11861                           | 3693 | 97 | 44.52% | 7.3761<br>23 | 140 | 49.77% | 10.65<br>788 | Arl4a             |
| 66432                           | 1525 | 97 | 87.74% | 17.862<br>31 | 95  | 82.56% | 17.51<br>362 | Slc7a6os          |
| 66206                           | 1428 | 97 | 87.39% | 19.075<br>65 | 58  | 80.81% | 11.41<br>884 | 1110059<br>E24Rik |
| 213068                          | 2931 | 97 | 73.11% | 9.2937<br>64 | 71  | 60.39% | 6.810<br>275 | Tmem71            |
| 57784                           | 1727 | 97 | 78%    | 15.773<br>03 | 88  | 78.75% | 14.32<br>559 | Bin3              |
| 11758                           | 2334 | 97 | 20.05% | 11.670<br>96 | 104 | 17.74% | 12.52<br>722 | Prdx6             |
| 66266                           | 1143 | 97 | 79.79% | 23.832<br>04 | 74  | 75.59% | 18.20<br>152 | Eapp              |
| 13521                           | 3863 | 97 | 67.18% | 7.0515<br>2  | 80  | 55.63% | 5.822<br>204 | Slc26a2           |
| 18030                           | 2019 | 97 | 19.61% | 13.491<br>84 | 89  | 19.61% | 12.39<br>298 | Nfil3             |
| 217030                          | 4589 | 97 | 53.85% | 5.9359<br>38 | 65  | 43.58% | 3.982<br>148 | Synrg             |
| 239170                          | 4051 | 97 | 60.43% | 6.7242<br>71 | 77  | 57.22% | 5.343<br>805 | Fam160b<br>2      |
| 20334                           | 4108 | 97 | 66.09% | 6.6309<br>69 | 69  | 50.63% | 4.722<br>161 | Sec23a            |

|        |      |    |        |              |     |        |              |        |
|--------|------|----|--------|--------------|-----|--------|--------------|--------|
| 68310  | 3832 | 96 | 65.71% | 7.0352<br>81 | 70  | 46.45% | 5.135<br>641 | Zmym1  |
| 100121 | 3537 | 96 | 66.30% | 7.6220<br>52 | 92  | 56.21% | 7.312<br>652 | Tdrd7  |
| 13437  | 1930 | 96 | 72.69% | 13.968<br>5  | 89  | 78.08% | 12.96<br>447 | Dnpep  |
| 27999  | 2739 | 96 | 73.60% | 9.8427<br>15 | 71  | 68.71% | 7.287<br>666 | Fam3c  |
| 228983 | 2745 | 96 | 76.10% | 9.8212<br>01 | 53  | 61.20% | 5.428<br>197 | Osbp12 |
| 108062 | 4352 | 96 | 58.07% | 6.1946<br>68 | 71  | 49.98% | 4.586<br>608 | Cstf2  |
| 11565  | 1806 | 96 | 81.40% | 14.927<br>57 | 130 | 82.17% | 20.23<br>707 | Adss11 |
| 80877  | 9900 | 96 | 32.44% | 2.7231<br>51 | 87  | 27.64% | 2.470<br>621 | Lrba   |
| 56464  | 1975 | 96 | 84.30% | 13.650<br>23 | 104 | 81.32% | 14.80<br>432 | Ctsf   |
| 22375  | 2831 | 96 | 38.89% | 9.5228<br>53 | 69  | 38.47% | 6.852<br>221 | Wars   |
| 240174 | 7896 | 96 | 37.18% | 3.4142<br>85 | 74  | 32.71% | 2.634<br>794 | Thada  |
| 16885  | 3323 | 96 | 71.38% | 8.1129<br>09 | 64  | 53.17% | 5.414<br>667 | Limk1  |
| 16569  | 5647 | 96 | 54.91% | 4.7740<br>74 | 67  | 41.81% | 3.335<br>64  | Kif3b  |
| 17161  | 4161 | 96 | 38.14% | 6.4790<br>19 | 104 | 43.21% | 7.026<br>802 | Maoa   |
| 30839  | 2359 | 96 | 79.57% | 11.428<br>23 | 66  | 66.89% | 7.865<br>713 | Fbxw5  |
| 12866  | 754  | 96 | 58.62% | 35.754<br>9  | 116 | 71.22% | 43.25<br>226 | Cox7a2 |
| 236900 | 2000 | 96 | 78.10% | 13.479<br>6  | 73  | 73.30% | 10.26<br>16  | Pdk3   |
| 72475  | 3211 | 96 | 62.54% | 8.3958<br>88 | 108 | 65.06% | 9.455<br>959 | Ssbp3  |
| 224014 | 3229 | 96 | 66.24% | 8.3490<br>85 | 83  | 56.77% | 7.226<br>569 | Fgd4   |
| 112407 | 2693 | 96 | 79.99% | 10.010<br>84 | 82  | 66.80% | 8.560<br>51  | Egln3  |
| 102193 | 2874 | 96 | 67.19% | 9.3803<br>75 | 80  | 68.37% | 7.825<br>739 | Zdhhc7 |
| 58193  | 3012 | 96 | 74.77% | 8.9505<br>96 | 197 | 86.29% | 18.38<br>795 | Extl2  |

|                              |       |    |        |              |     |        |              |         |
|------------------------------|-------|----|--------|--------------|-----|--------|--------------|---------|
| 28042                        | 6769  | 96 | 46.15% | 3.9827<br>44 | 47  | 26.99% | 1.952<br>07  | Ept1    |
| 320727                       | 5359  | 96 | 49.37% | 5.0306<br>39 | 91  | 46.15% | 4.773<br>971 | Ipo8    |
| 70238                        | 4468  | 96 | 60.63% | 6.0338<br>4  | 79  | 49.73% | 4.970<br>912 | Rnf168  |
| 244962                       | 3112  | 96 | 65.46% | 8.6629<br>81 | 72  | 49.10% | 6.504<br>517 | Snx14   |
| gi 118130175 ref NM_152800.2 | 1499  | 96 | 87.46% | 17.984<br>79 | 89  | 78.45% | 16.69<br>208 | -       |
| 77593                        | 6018  | 96 | 50.47% | 4.4797<br>6  | 84  | 44.82% | 3.924<br>183 | Usp45   |
| 224794                       | 4558  | 96 | 55.81% | 5.9146<br>99 | 106 | 62.22% | 6.538<br>132 | Enpp4   |
| 269401                       | 5390  | 96 | 53.21% | 5.0017<br>06 | 47  | 32.65% | 2.451<br>496 | Znf512b |
| 94219                        | 3330  | 96 | 66.91% | 8.0958<br>55 | 74  | 56.43% | 6.247<br>548 | Cnm2    |
| 239319                       | 4531  | 95 | 61.09% | 5.8879<br>65 | 49  | 32.99% | 3.040<br>354 | Card6   |
| 212139                       | 3349  | 95 | 69.90% | 7.9660<br>71 | 54  | 51.24% | 4.533<br>157 | Cc2d1a  |
| 140499                       | 3502  | 95 | 35.72% | 7.6180<br>39 | 89  | 28.75% | 7.144<br>897 | Ube2j2  |
| 23882                        | 1081  | 95 | 83.81% | 24.679<br>34 | 164 | 92.97% | 42.65<br>209 | Gadd45g |
| gi 160333756 ref NM_144851.4 | 3751  | 95 | 68.94% | 7.1123<br>36 | 79  | 56.20% | 5.921<br>097 | -       |
| 66892                        | 2513  | 95 | 73.62% | 10.616<br>14 | 108 | 77.28% | 12.08<br>24  | Eif4e3  |
| 236312                       | 3497  | 95 | 39.92% | 7.6289<br>31 | 79  | 38.26% | 6.351<br>168 | Pyhin1  |
| 408067                       | 3792  | 95 | 42.62% | 7.0354<br>36 | 102 | 48.60% | 7.562<br>301 | Zfp874b |
| 77097                        | 11864 | 95 | 29.87% | 2.2486<br>83 | 39  | 14.33% | 0.924<br>178 | Tanc2   |
| 108687                       | 2294  | 95 | 67.57% | 11.629<br>63 | 109 | 71.45% | 13.35<br>842 | Edem2   |
| 257632                       | 4621  | 95 | 49.62% | 5.7732<br>9  | 111 | 53.93% | 6.753<br>192 | Nod2    |
| 12043                        | 7206  | 95 | 37.32% | 3.7022<br>44 | 30  | 17.76% | 1.170<br>44  | Bcl2    |
| 109129                       | 1302  | 95 | 85.10% | 20.490<br>3  | 98  | 86.41% | 21.16<br>105 | Mmadhc  |

|                              |      |    |        |              |     |        |              |              |
|------------------------------|------|----|--------|--------------|-----|--------|--------------|--------------|
| 15511                        | 2810 | 95 | 41.60% | 9.4940<br>82 | 72  | 38.08% | 7.203<br>579 | Hspa1b       |
| 56790                        | 1968 | 95 | 79.88% | 13.556<br>08 | 62  | 72.51% | 8.857<br>042 | Fam48a       |
| 107350                       | 799  | 95 | 74.22% | 33.389<br>7  | 102 | 86.36% | 35.89<br>017 | AW1120<br>10 |
| 27052                        | 2915 | 95 | 68.23% | 9.1521       | 98  | 75.09% | 9.451<br>694 | Aoah         |
| 17527                        | 1712 | 95 | 83.82% | 15.583<br>16 | 92  | 84.81% | 15.10<br>797 | Mpv17        |
| 75600                        | 861  | 95 | 93.61% | 30.985<br>33 | 121 | 90.59% | 39.50<br>975 | Calml4       |
| gi 118130442 ref NM_177562.4 | 6189 | 95 | 50.33% | 4.3106<br>11 | 60  | 38.10% | 2.725<br>542 | -            |
| 16553                        | 6866 | 95 | 44.49% | 3.8855<br>77 | 104 | 43.74% | 4.258<br>451 | Kif13a       |
| gi 149256303 ref XR_034015.1 | 2284 | 95 | 15.19% | 11.680<br>55 | 108 | 14.93% | 13.29<br>382 | -            |
| 27681                        | 947  | 95 | 84.05% | 28.171<br>46 | 90  | 86.17% | 26.71<br>866 | Snf8         |
| gi 153792584 ref NM_021438.3 | 1074 | 95 | 93.48% | 24.840<br>2  | 52  | 85.10% | 13.61<br>198 | -            |
| 21780                        | 3918 | 95 | 51.17% | 6.8091<br>81 | 69  | 40.48% | 4.951<br>158 | Tfam         |
| 22026                        | 7637 | 95 | 33.86% | 3.4933<br>05 | 31  | 17.56% | 1.141<br>198 | Nr2c2        |
| gi 142350336 ref NM_029846.3 | 3066 | 95 | 69.99% | 8.7013<br>61 | 81  | 65.04% | 7.427<br>369 | -            |
| 68342                        | 657  | 94 | 85.69% | 40.178<br>91 | 108 | 96.65% | 46.21<br>474 | Ndufb10      |
| 18393                        | 3417 | 94 | 64%    | 7.7253<br>57 | 51  | 50.34% | 4.196<br>114 | Orc2         |
| 233064                       | 4744 | 94 | 54.01% | 5.5644<br>07 | 70  | 43.93% | 4.148<br>351 | Wdr62        |
| 72308                        | 2755 | 94 | 69.66% | 9.5816<br>87 | 84  | 61.71% | 8.571<br>953 | Brf1         |
| 232533                       | 4617 | 94 | 56.27% | 5.7174<br>67 | 80  | 49.25% | 4.871<br>382 | Stk38l       |
| 68938                        | 1872 | 94 | 85.20% | 14.101<br>25 | 78  | 76.87% | 11.71<br>415 | Aspscr1      |
| 17940                        | 5361 | 94 | 45.74% | 4.9239<br>97 | 130 | 44.56% | 6.817<br>414 | Naip1        |
| 72512                        | 2302 | 94 | 76.50% | 11.467<br>22 | 66  | 66.51% | 8.060<br>477 | Tmem17<br>3  |

|        |      |    |        |              |     |        |              |                   |
|--------|------|----|--------|--------------|-----|--------|--------------|-------------------|
| 67689  | 1915 | 94 | 80.89% | 13.784<br>62 | 115 | 80.10% | 16.88<br>306 | Aldh3b1           |
| 240672 | 1155 | 94 | 77.92% | 22.855<br>02 | 80  | 78.53% | 19.47<br>288 | Dusp5             |
| 104479 | 3418 | 94 | 71.80% | 7.7230<br>97 | 100 | 63.25% | 8.225<br>268 | Ccdc117           |
| 216505 | 2267 | 94 | 78.21% | 11.644<br>26 | 64  | 68.15% | 7.936<br>894 | Pik3ip1           |
| 57773  | 3906 | 94 | 65.34% | 6.7582<br>04 | 67  | 49.80% | 4.822<br>416 | Wdr4              |
| 319710 | 4695 | 94 | 49.12% | 5.6224<br>81 | 68  | 39.77% | 4.071<br>884 | Frmd6             |
| 18640  | 7308 | 94 | 42.04% | 3.6121<br>44 | 75  | 32.91% | 2.885<br>259 | Pfkfb2            |
| 103710 | 3059 | 94 | 63.22% | 8.6294<br>69 | 69  | 51.45% | 6.341<br>496 | Slc35e4           |
| 11821  | 866  | 94 | 95.61% | 30.482<br>16 | 83  | 97%    | 26.94<br>526 | Aprt              |
| 245666 | 6003 | 94 | 47.99% | 4.3973<br>92 | 82  | 38.98% | 3.840<br>322 | Iqsec2            |
| 17252  | 1574 | 94 | 84.24% | 16.771       | 38  | 56.54% | 6.787<br>362 | Rdh11             |
| 230673 | 3588 | 94 | 68.53% | 7.3571<br>76 | 67  | 46.54% | 5.249<br>821 | Ipo13             |
| 212281 | 5180 | 94 | 57.37% | 5.0960<br>51 | 79  | 48.19% | 4.287<br>651 | A530054<br>K11Rik |
| 15193  | 2251 | 94 | 83.47% | 11.727<br>03 | 78  | 79.16% | 9.741<br>845 | Hdgfrp2           |
| 17912  | 5052 | 94 | 53.48% | 5.2251<br>68 | 72  | 38.60% | 4.006<br>741 | Myo1b             |
| 70432  | 8936 | 94 | 33.49% | 2.9540<br>67 | 69  | 26.25% | 2.170<br>841 | Rufy2             |
| 66048  | 1402 | 94 | 65.34% | 18.828<br>49 | 104 | 70.40% | 20.85<br>487 | Emc6              |
| 104184 | 2355 | 94 | 77.58% | 11.209<br>15 | 96  | 77.41% | 11.46<br>047 | Blmh              |
| 54367  | 2672 | 94 | 60.70% | 9.8793<br>21 | 90  | 57.97% | 9.469<br>525 | Zfp326            |
| 14467  | 2115 | 93 | 82.36% | 12.348<br>33 | 81  | 69.03% | 10.76<br>705 | Gbas              |
| 217893 | 5480 | 93 | 30.24% | 4.7658<br>25 | 47  | 23.39% | 2.411<br>234 | Pacs2             |
| 227612 | 3428 | 93 | 63.54% | 7.6186<br>47 | 26  | 20.86% | 2.132<br>331 | A830007<br>P12Rik |

|        |      |    |        |              |     |        |              |              |
|--------|------|----|--------|--------------|-----|--------|--------------|--------------|
| 83814  | 8212 | 93 | 28.75% | 3.1803<br>12 | 79  | 26.44% | 2.704<br>583 | Nedd4l       |
| 15512  | 2595 | 93 | 71.48% | 10.064<br>25 | 131 | 84.47% | 14.19<br>241 | Hspa2        |
| 235293 | 2249 | 93 | 82.88% | 11.612<br>59 | 102 | 86.53% | 12.75<br>066 | Sc5d         |
| 75608  | 1607 | 93 | 33.04% | 16.251<br>85 | 94  | 37.83% | 16.44<br>501 | Chmp4b       |
| 83797  | 3153 | 93 | 72.85% | 8.2831<br>34 | 76  | 60.58% | 6.776<br>598 | Smarcd1      |
| 55934  | 1142 | 93 | 89.93% | 22.869<br>28 | 96  | 78.28% | 23.63<br>346 | Rp9          |
| 68318  | 5185 | 93 | 44.36% | 5.0369<br>76 | 125 | 57.51% | 6.777<br>716 | Aph1c        |
| 14056  | 2665 | 93 | 66.57% | 9.7998<br>96 | 47  | 57.15% | 4.958<br>185 | Ezh2         |
| 105638 | 3016 | 93 | 65.02% | 8.6593<br>9  | 76  | 47.84% | 7.084<br>421 | Dph3         |
| 64380  | 1723 | 93 | 73.42% | 15.157<br>7  | 41  | 46.60% | 6.689<br>916 | Ms4a4c       |
| 22694  | 3033 | 93 | 62.31% | 8.6108<br>54 | 72  | 53.54% | 6.673<br>939 | Zfp35        |
| 108888 | 2426 | 93 | 80.87% | 10.765<br>34 | 76  | 69.83% | 8.807<br>343 | Atad3a       |
| 29812  | 2683 | 93 | 71.19% | 9.7341<br>49 | 66  | 64.41% | 6.915<br>847 | Ndr3         |
| 67706  | 848  | 93 | 83.61% | 30.798<br>02 | 99  | 79.95% | 32.82<br>173 | Tmem17<br>9b |
| 78894  | 3175 | 93 | 67.62% | 8.2257<br>39 | 77  | 68.03% | 6.818<br>19  | Aacs         |
| 67059  | 2189 | 93 | 66.65% | 11.930<br>89 | 73  | 59.43% | 9.375<br>603 | Ola1         |
| 116871 | 2673 | 93 | 51.03% | 9.7705<br>65 | 68  | 41.79% | 7.152<br>075 | Mta3         |
| 59035  | 3231 | 93 | 56.17% | 8.0831<br>7  | 75  | 52.52% | 6.525<br>99  | Carm1        |
| 75221  | 2683 | 93 | 66.83% | 9.7341<br>49 | 79  | 70.07% | 8.278<br>059 | Dpp3         |
| 69719  | 7106 | 93 | 46.02% | 3.6753<br>06 | 60  | 31.40% | 2.373<br>822 | Cad          |
| 110172 | 1169 | 93 | 92.04% | 22.341<br>08 | 78  | 87.77% | 18.75<br>868 | Slc35b1      |
| 1E+08  | 4894 | 93 | 7.11%  | 5.3364<br>78 | 101 | 7.34%  | 5.802<br>024 | Gm4415       |



|                              |      |    |        |              |     |        |              |         |
|------------------------------|------|----|--------|--------------|-----|--------|--------------|---------|
| 78581                        | 2917 | 93 | 58.24% | 8.9532<br>81 | 90  | 57.73% | 8.674<br>175 | Utp23   |
| 18105                        | 3974 | 93 | 58.40% | 6.5718<br>98 | 109 | 63.06% | 7.711<br>178 | Nqo2    |
| 53598                        | 966  | 93 | 81.16% | 27.035<br>94 | 111 | 82.09% | 32.30<br>487 | Dctn3   |
| 68215                        | 1861 | 93 | 71.68% | 14.033<br>7  | 87  | 72.65% | 13.14<br>301 | Fam98b  |
| 252972                       | 4666 | 92 | 57.54% | 5.5370<br>55 | 69  | 44.15% | 4.157<br>445 | Tpcn1   |
| 26754                        | 1273 | 92 | 94.42% | 20.295<br>28 | 89  | 87.20% | 19.65<br>548 | Cops5   |
| 15216                        | 1722 | 92 | 81.53% | 15.003<br>42 | 119 | 89.43% | 19.42<br>835 | Hfe     |
| 76233                        | 1257 | 92 | 76.05% | 20.553<br>62 | 74  | 80.03% | 16.55<br>078 | Dnttip1 |
| 78771                        | 4289 | 92 | 55.19% | 6.0237<br>58 | 103 | 57.24% | 6.751<br>547 | Mctp1   |
| 1E+08                        | 2483 | 92 | 36.05% | 10.405<br>11 | 108 | 31.29% | 12.22<br>839 | Gm3006  |
| 21681                        | 1132 | 92 | 66.08% | 22.823<br>23 | 116 | 78.80% | 28.80<br>936 | Alyref  |
| 50868                        | 4470 | 92 | 45.91% | 5.7798<br>43 | 49  | 34.36% | 3.081<br>844 | Keap1   |
| 67941                        | 464  | 92 | 83.84% | 55.680<br>81 | 89  | 93.32% | 53.92<br>55  | Rps27l  |
| 56438                        | 1655 | 92 | 73.41% | 15.610<br>81 | 92  | 74.44% | 15.62<br>831 | Rbx1    |
| 21976                        | 2987 | 92 | 71.01% | 8.6494<br>46 | 63  | 56.24% | 5.929<br>628 | Top3b   |
| 67036                        | 2431 | 92 | 61.13% | 10.627<br>68 | 72  | 48.58% | 8.326<br>637 | Mrpl45  |
| 235041                       | 4853 | 92 | 53.41% | 5.3236<br>96 | 58  | 39.30% | 3.360<br>004 | Kank2   |
| gi 158533980 ref NM_009124.5 | 5431 | 92 | 53.34% | 4.7571<br>16 | 61  | 41.52% | 3.157<br>709 | -       |
| 51791                        | 2356 | 92 | 79.88% | 10.966       | 74  | 69.40% | 8.830<br>363 | Rgs14   |
| 226470                       | 8362 | 92 | 37.80% | 3.0896<br>79 | 49  | 22.24% | 1.647<br>434 | Zbtb41  |
| 14594                        | 3586 | 92 | 65.39% | 7.2046<br>56 | 73  | 54.55% | 5.723<br>144 | Ggta1   |
| gi 54020728 ref NM_053082.2  | 1479 | 92 | 63.08% | 17.468<br>49 | 114 | 68.09% | 21.66<br>999 | -       |

|        |      |    |        |              |     |        |              |                   |
|--------|------|----|--------|--------------|-----|--------|--------------|-------------------|
| 27784  | 3464 | 92 | 59.53% | 7.4584       | 79  | 57.68% | 6.411<br>672 | Commd8            |
| 68968  | 6384 | 92 | 46.57% | 4.0469<br>76 | 53  | 32.72% | 2.334<br>023 | Cdan1             |
| 26426  | 1448 | 92 | 79.35% | 17.842<br>47 | 74  | 82.94% | 14.36<br>763 | Nubp2             |
| 67834  | 2418 | 92 | 75.60% | 10.684<br>82 | 83  | 66.13% | 9.650<br>369 | Idh3a             |
| 218639 | 3376 | 91 | 62.35% | 7.5696<br>3  | 72  | 54.41% | 5.995<br>87  | Arl15             |
| 69605  | 8775 | 91 | 33.50% | 2.9122<br>59 | 57  | 22.74% | 1.826<br>206 | Lnp               |
| 72454  | 3108 | 91 | 63.74% | 8.2223<br>53 | 74  | 57.79% | 6.693<br>801 | Ccdc71            |
| 380959 | 3727 | 91 | 64.58% | 6.8567<br>4  | 39  | 34.08% | 2.941<br>896 | Alg10b            |
| 67797  | 1789 | 91 | 61.49% | 14.284<br>56 | 102 | 68.25% | 16.02<br>92  | Snrnp48           |
| 67842  | 3828 | 91 | 49.69% | 6.6758<br>29 | 82  | 43.03% | 6.022<br>323 | 2610027<br>L16Rik |
| 235907 | 3960 | 91 | 46.72% | 6.4533<br>01 | 91  | 36.52% | 6.460<br>533 | Zfp71-rs<br>1     |
| 224624 | 2466 | 91 | 72.14% | 10.362<br>96 | 51  | 52.47% | 5.814<br>324 | Rab40c            |
| 217026 | 5677 | 91 | 50.94% | 4.5015<br>1  | 75  | 43.95% | 3.714<br>193 | Heatr6            |
| 240427 | 9981 | 91 | 33.59% | 2.5603<br>72 | 32  | 14.21% | 0.901<br>359 | Setbp1            |
| 19889  | 3786 | 91 | 56.08% | 6.7498<br>87 | 80  | 48.55% | 5.940<br>616 | Rp2h              |
| 66939  | 2600 | 91 | 70.50% | 9.8288<br>74 | 82  | 66.08% | 8.866<br>712 | Aagab             |
| 26893  | 1094 | 91 | 83.46% | 23.359<br>3  | 86  | 82.63% | 22.10<br>056 | Cops6             |
| 14911  | 2110 | 91 | 78.86% | 12.111<br>41 | 59  | 71.66% | 7.861<br>251 | Thumpd<br>3       |
| 231510 | 2877 | 91 | 68.93% | 8.8825<br>41 | 85  | 61.38% | 8.306<br>177 | Agpat9            |
| 232976 | 4195 | 91 | 56.73% | 6.0917<br>93 | 69  | 51.80% | 4.624<br>228 | Zfp574            |
| 19817  | 332  | 91 | 90.66% | 76.973<br>11 | 106 | 90.06% | 89.76<br>146 | Rn7sk             |
| 227644 | 4507 | 91 | 58.18% | 5.6700<br>85 | 61  | 41.03% | 3.805<br>085 | Snapc4            |

|                                  |      |    |        |              |     |        |              |          |
|----------------------------------|------|----|--------|--------------|-----|--------|--------------|----------|
| 68576                            | 905  | 91 | 66.19% | 28.237<br>65 | 102 | 66.63% | 31.68<br>646 | Hbxip    |
| 246256                           | 1250 | 91 | 92.72% | 20.444<br>06 | 155 | 97.60% | 34.86<br>132 | Fcgr4    |
| 228026                           | 5137 | 91 | 45.94% | 4.9747<br>07 | 81  | 49.58% | 4.432<br>998 | Pdk1     |
| 235323                           | 4220 | 91 | 61.33% | 6.0557<br>04 | 59  | 42.09% | 3.930<br>626 | Usp28    |
| 228368                           | 3154 | 91 | 60.88% | 8.1024<br>32 | 56  | 47.72% | 4.991<br>7   | Slc35c1  |
| 12419                            | 8902 | 91 | 37.43% | 2.8707<br>11 | 47  | 20.46% | 1.484<br>337 | Cbx5     |
| 108682                           | 3596 | 91 | 65.38% | 7.1065<br>27 | 65  | 53.03% | 5.081<br>779 | Gpt2     |
| 13619                            | 3839 | 91 | 65.75% | 6.6567       | 62  | 47.69% | 4.540<br>417 | Phc1     |
| 236082                           | 2211 | 91 | 65.36% | 11.558<br>15 | 79  | 53.69% | 10.04<br>524 | Dhrsx    |
| 15107                            | 1720 | 91 | 84.59% | 14.857<br>6  | 99  | 85.58% | 16.18<br>188 | Hadh     |
| 106582                           | 1502 | 91 | 79.43% | 17.014<br>03 | 76  | 76.96% | 14.22<br>544 | Nrm      |
| 54447                            | 4835 | 91 | 55.74% | 5.2854<br>34 | 76  | 52.33% | 4.419<br>155 | Asah2    |
| gi 146198790 ref N<br>M_178896.4 | 4063 | 91 | 55.65% | 6.2897<br>05 | 65  | 49.64% | 4.497<br>681 | -        |
| 212531                           | 3501 | 91 | 61.58% | 7.2993<br>63 | 47  | 46.44% | 3.774<br>226 | Sh3bgrl2 |
| 60406                            | 1183 | 90 | 77.94% | 21.364<br>54 | 99  | 80.81% | 23.52<br>733 | Sap30    |
| gi 148540115 ref N<br>M_178767.4 | 2156 | 90 | 76.02% | 11.722<br>75 | 81  | 71.15% | 10.56<br>23  | -        |
| 52585                            | 1486 | 90 | 82.37% | 17.008<br>24 | 100 | 86.81% | 18.91<br>922 | Dhrs1    |
| 17131                            | 4441 | 90 | 54.45% | 5.6911<br>16 | 136 | 61.09% | 8.609<br>546 | Smad7    |
| 83962                            | 3020 | 90 | 40.89% | 8.3689<br>56 | 57  | 38.28% | 5.306<br>278 | Btbd1    |
| gi 293597554 ref N<br>R_033443.1 | 4737 | 90 | 19.74% | 5.3354<br>96 | 66  | 20.90% | 3.917<br>082 | -        |
| 12696                            | 1256 | 90 | 96.26% | 20.122<br>81 | 59  | 82.17% | 13.20<br>64  | Cirbp    |
| 56335                            | 2035 | 90 | 83.05% | 12.419<br>78 | 71  | 69.88% | 9.808<br>804 | Mettl3   |

|                                     |      |    |        |              |     |        |              |                   |
|-------------------------------------|------|----|--------|--------------|-----|--------|--------------|-------------------|
| 67707                               | 949  | 90 | 67.65% | 26.632<br>5  | 92  | 63.01% | 27.25<br>485 | Mrpl24            |
| 71101                               | 7343 | 90 | 37.97% | 3.4419<br>51 | 60  | 30.41% | 2.297<br>205 | 4933407<br>H18Rik |
| 67139                               | 2766 | 90 | 69.34% | 9.1374<br>72 | 86  | 59.47% | 8.741<br>146 | Mis12             |
| 231866                              | 4271 | 90 | 60.08% | 5.9176<br>41 | 50  | 40.76% | 3.291<br>263 | Zfp12             |
| 19655                               | 2440 | 90 | 60.29% | 10.358<br>3  | 92  | 60.53% | 10.60<br>035 | Rbmx              |
| 216766                              | 6229 | 90 | 47.79% | 4.0575<br>13 | 56  | 34.58% | 2.527<br>504 | Gemin5            |
| 66329                               | 1144 | 90 | 84.18% | 22.092<br>87 | 84  | 83.30% | 20.64<br>312 | Susd3             |
| 216197                              | 2915 | 90 | 66.83% | 8.6704<br>11 | 66  | 61.48% | 6.365<br>426 | Ckap4             |
| 73373                               | 2104 | 90 | 80.32% | 12.012<br>47 | 76  | 65.45% | 10.15<br>523 | Phospho<br>2      |
| 76425                               | 1877 | 90 | 58.76% | 13.465<br>24 | 78  | 58.39% | 11.68<br>295 | Gid8              |
| 66960                               | 2333 | 90 | 75.48% | 10.833<br>37 | 114 | 80.71% | 13.73<br>764 | Fam188a           |
| 66753                               | 3501 | 90 | 43.39% | 7.2191<br>51 | 84  | 52.50% | 6.745<br>425 | Erlec1            |
| gi 110556648 ref N<br>M_026187.4    | 2777 | 90 | 66.65% | 9.1012<br>77 | 47  | 51.17% | 4.758<br>215 | -                 |
| 22248                               | 1319 | 90 | 82.41% | 19.161<br>67 | 95  | 76.27% | 20.24<br>888 | Unc119            |
| 72290                               | 6453 | 90 | 44.37% | 3.9166<br>66 | 117 | 51.90% | 5.097<br>372 | Lsm11             |
| 83409                               | 586  | 90 | 79.69% | 43.130<br>11 | 95  | 81.74% | 45.57<br>725 | Lamtor2           |
| 29863                               | 4127 | 90 | 54.81% | 6.1241<br>21 | 38  | 34.70% | 2.588<br>638 | Pde7b             |
| 223918                              | 2454 | 90 | 72.70% | 10.299<br>2  | 55  | 54.56% | 6.301<br>011 | Spryd3            |
| 70556                               | 1877 | 90 | 75.49% | 13.465<br>24 | 105 | 74.11% | 15.72<br>705 | Slc25a33          |
| gi 124487210 ref N<br>M_001081155.1 | 3218 | 90 | 53.98% | 7.8540<br>23 | 61  | 47.89% | 5.329<br>248 | -                 |
| 108707                              | 2444 | 90 | 70.99% | 10.341<br>34 | 76  | 66%    | 8.742<br>477 | 1810008<br>A18Rik |
| 66181                               | 695  | 90 | 78.27% | 36.365<br>82 | 80  | 60.29% | 32.36<br>14  | Nop10             |

|                                  |      |    |        |              |     |        |              |                   |
|----------------------------------|------|----|--------|--------------|-----|--------|--------------|-------------------|
| 55980                            | 2601 | 90 | 63.05% | 9.7171<br>27 | 72  | 64.40% | 7.782<br>413 | Impa1             |
| 320634                           | 5198 | 89 | 48.44% | 4.8082<br>77 | 77  | 48.52% | 4.164<br>631 | Ocrl              |
| 51798                            | 1138 | 89 | 95.52% | 21.962<br>58 | 82  | 92.27% | 20.25<br>787 | Ech1              |
| 98828                            | 1623 | 89 | 73.20% | 15.399<br>52 | 104 | 79.61% | 18.01<br>511 | Cdc123            |
| 56207                            | 1851 | 89 | 71.31% | 13.502<br>66 | 75  | 66.88% | 11.39<br>14  | Uchl5             |
| 233875                           | 1143 | 89 | 59.76% | 21.866<br>51 | 78  | 52.67% | 19.18<br>538 | Ino80e            |
| 20016                            | 1305 | 89 | 86.82% | 19.152<br>05 | 95  | 86.74% | 20.46<br>611 | Polr1c            |
| 230596                           | 1519 | 89 | 87.89% | 16.453<br>87 | 91  | 74.65% | 16.84<br>247 | Prpf38a           |
| 66096                            | 900  | 89 | 64%    | 27.770<br>47 | 117 | 67%    | 36.54<br>816 | 0910001<br>L09Rik |
| 56437                            | 1577 | 89 | 92.20% | 15.848<br>71 | 75  | 93.28% | 13.37<br>062 | Rrad              |
| 74102                            | 4200 | 89 | 47.21% | 5.9508<br>15 | 70  | 49.29% | 4.685<br>661 | Slc35a5           |
| 66075                            | 1432 | 89 | 51.96% | 17.453<br>51 | 91  | 58.17% | 17.86<br>572 | Chchd3            |
| 217331                           | 3715 | 89 | 62.66% | 6.7277<br>04 | 50  | 40.97% | 3.783<br>845 | Unk               |
| 14284                            | 5886 | 89 | 8.31%  | 4.2462<br>49 | 66  | 7.99%  | 3.152<br>432 | Fosl2             |
| gi 144094255 ref N<br>M_145937.2 | 2616 | 89 | 74.20% | 9.5540<br>6  | 65  | 62.04% | 6.985<br>504 | -                 |
| 266632                           | 2825 | 89 | 73.17% | 8.8472<br>29 | 79  | 68.18% | 7.861<br>959 | Irak4             |
| 56174                            | 1330 | 89 | 84.66% | 18.792<br>05 | 72  | 82.41% | 15.21<br>959 | Nagk              |
| 20728                            | 1266 | 89 | 84.04% | 19.742<br>04 | 46  | 77.49% | 10.21<br>519 | Spic              |
| 56530                            | 1017 | 89 | 81.32% | 24.575<br>64 | 73  | 72.66% | 20.18<br>013 | Cnpy2             |
| 666938                           | 7935 | 89 | 38.37% | 3.1497<br>7  | 50  | 23.64% | 1.771<br>516 | Bend4             |
| 107392                           | 1396 | 89 | 85.24% | 17.903<br>6  | 102 | 85.39% | 20.54<br>172 | Brms1             |
| 67045                            | 3201 | 89 | 61.82% | 7.8080<br>04 | 70  | 58.17% | 6.148<br>009 | Riok2             |

|                              |      |    |        |              |     |        |              |                   |
|------------------------------|------|----|--------|--------------|-----|--------|--------------|-------------------|
| gi 142387616 ref NM_028126.2 | 2015 | 89 | 78.21% | 12.403<br>68 | 68  | 74.79% | 9.487<br>592 | -                 |
| 70625                        | 3040 | 89 | 62.47% | 8.2215<br>2  | 64  | 52.34% | 5.918<br>73  | Med26             |
| 77286                        | 3279 | 89 | 58.16% | 7.6222<br>69 | 102 | 68.83% | 8.745<br>424 | Nkrf              |
| 70461                        | 5110 | 89 | 33.70% | 4.8910<br>81 | 84  | 30.72% | 4.621<br>474 | Crtc3             |
| 67673                        | 508  | 89 | 82.68% | 49.199<br>65 | 101 | 80.12% | 55.89<br>588 | Tceb2             |
| 69601                        | 6549 | 89 | 42.79% | 3.8163<br>72 | 107 | 46.37% | 4.593<br>364 | Dab2ip            |
| 381280                       | 8449 | 89 | 23.77% | 2.9581<br>51 | 59  | 21.97% | 1.963<br>219 | Hjurp             |
| 66593                        | 1939 | 89 | 62.71% | 12.889<br>85 | 90  | 58.84% | 13.04<br>929 | Diablo            |
| 67026                        | 2160 | 89 | 75.32% | 11.571<br>03 | 47  | 58.61% | 6.117<br>391 | Thap4             |
| 100662                       | 3809 | 89 | 54.50% | 6.5616<br>75 | 95  | 63.85% | 7.011<br>884 | D930016<br>D06Rik |
| 30931                        | 1452 | 89 | 80.72% | 17.213<br>1  | 74  | 80.10% | 14.32<br>805 | Tor1a             |
| 17087                        | 603  | 89 | 97.01% | 41.448<br>46 | 131 | 98.51% | 61.07<br>678 | Ly96              |
| 19298                        | 3131 | 89 | 70.46% | 7.9825<br>68 | 93  | 64.39% | 8.350<br>683 | Pex19             |
| 54405                        | 516  | 89 | 78.10% | 48.436<br>86 | 132 | 72.48% | 71.91<br>945 | Ndufa1            |
| 56372                        | 1400 | 89 | 71.79% | 17.852<br>44 | 85  | 76.21% | 17.06<br>919 | 1110004<br>F10Rik |
| 234374                       | 2104 | 88 | 62.69% | 11.745<br>53 | 90  | 61.17% | 12.02<br>594 | Ddx49             |
| 14718                        | 2065 | 88 | 34.92% | 11.967<br>36 | 70  | 33.66% | 9.530<br>158 | Got1              |
| 68833                        | 1706 | 88 | 60.26% | 14.485<br>7  | 100 | 66.18% | 16.47<br>946 | Pdcl3             |
| 102462                       | 915  | 88 | 91.37% | 27.008<br>3  | 73  | 79.02% | 22.42<br>972 | Imp3              |
| gi 50838805 ref NM_172703.2  | 5534 | 88 | 16.25% | 4.4655<br>94 | 70  | 19.06% | 3.556<br>158 | -                 |
| 238130                       | 8072 | 88 | 34.77% | 3.0615<br>21 | 66  | 28.20% | 2.298<br>714 | Dock4             |
| 230234                       | 4299 | 88 | 58.57% | 5.7484<br>52 | 67  | 50.76% | 4.381<br>567 | BC0265<br>90      |

|        |      |    |        |              |     |        |              |          |
|--------|------|----|--------|--------------|-----|--------|--------------|----------|
| 54616  | 5995 | 88 | 45.62% | 4.1222<br>01 | 63  | 37.21% | 2.954<br>428 | Extl3    |
| 68738  | 3594 | 88 | 58.76% | 6.8760<br>7  | 49  | 44.46% | 3.833<br>012 | Accs1    |
| 245474 | 2803 | 88 | 62.61% | 8.8164<br>81 | 87  | 60.86% | 8.726<br>062 | Dkc1     |
| 434204 | 3069 | 88 | 64.81% | 8.0523<br>29 | 108 | 71.72% | 9.893<br>478 | Whamm    |
| 15257  | 8065 | 88 | 12%    | 3.0641<br>78 | 84  | 11.64% | 2.928<br>175 | Hipk1    |
| 54486  | 3298 | 88 | 63.61% | 7.4932<br>07 | 63  | 58.64% | 5.370<br>467 | Hpgds    |
| 268512 | 2692 | 88 | 68.05% | 9.1800<br>14 | 75  | 57.54% | 7.832<br>643 | Slc26a11 |
| 66926  | 2820 | 88 | 79.93% | 8.7633<br>32 | 55  | 58.55% | 5.483<br>22  | Trmt6    |
| 70005  | 4764 | 88 | 28.57% | 5.1873<br>63 | 71  | 30.79% | 4.189<br>949 | Znf41-ps |
| 224044 | 2735 | 88 | 71.26% | 9.0356<br>84 | 106 | 69.84% | 10.89<br>609 | Cyp2ab1  |
| 270166 | 2851 | 88 | 69.17% | 8.6680<br>45 | 64  | 52.26% | 6.311<br>097 | Clpx     |
| 67490  | 4335 | 87 | 51.67% | 5.6359<br>34 | 54  | 38.94% | 3.502<br>086 | Ufl1     |
| 234069 | 2408 | 87 | 76.87% | 10.146<br>08 | 75  | 72.26% | 8.756<br>426 | Pcid2    |
| 81500  | 1715 | 87 | 84.37% | 14.245<br>93 | 121 | 83.27% | 19.83<br>551 | Sil1     |
| 66826  | 1854 | 87 | 77.83% | 13.177<br>87 | 50  | 72.92% | 7.581<br>976 | Taz      |
| 106633 | 5814 | 87 | 40.83% | 4.2022<br>31 | 52  | 28.52% | 2.514<br>493 | Ift140   |
| 235339 | 4051 | 87 | 53.22% | 6.0310<br>47 | 88  | 52.60% | 6.107<br>206 | Dlat     |
| 74167  | 1334 | 87 | 90.33% | 18.314<br>67 | 102 | 81.11% | 21.49<br>644 | Nudt9    |
| 12868  | 545  | 87 | 65.87% | 44.828<br>94 | 88  | 71.56% | 45.39<br>503 | Cox8a    |
| 244745 | 4753 | 87 | 46.01% | 5.1402<br>84 | 99  | 48.33% | 5.855<br>844 | Dpy1911  |
| 101513 | 1456 | 87 | 81.46% | 16.780<br>06 | 80  | 80.56% | 15.44<br>723 | Mob2     |
| 17993  | 1534 | 87 | 66.56% | 15.926<br>84 | 82  | 69.62% | 15.02<br>833 | Ndufs4   |

|        |      |    |        |              |     |        |              |                   |
|--------|------|----|--------|--------------|-----|--------|--------------|-------------------|
| 18715  | 2054 | 87 | 50.78% | 11.894<br>73 | 51  | 42.70% | 6.980<br>586 | Pim2              |
| 13560  | 2574 | 87 | 71.60% | 9.4917<br>53 | 55  | 50.19% | 6.007<br>258 | E4f1              |
| 67698  | 2107 | 87 | 59.90% | 11.595<br>53 | 93  | 53.58% | 12.40<br>911 | Fam174a           |
| 71330  | 3949 | 87 | 55.43% | 6.1868<br>25 | 54  | 44.19% | 3.844<br>402 | Rcbtb1            |
| 382236 | 6434 | 87 | 38.81% | 3.7972<br>91 | 87  | 40.15% | 3.801<br>547 | Brwd3             |
| 20597  | 2430 | 87 | 74.16% | 10.054<br>23 | 73  | 71.85% | 8.445<br>759 | Smpd1             |
| 28071  | 2324 | 87 | 65.10% | 10.512<br>81 | 100 | 60.67% | 12.09<br>723 | Twistnb           |
| 66681  | 2179 | 87 | 77.01% | 11.212<br>38 | 68  | 68.79% | 8.773<br>519 | Pgm1              |
| 228812 | 1621 | 87 | 82.91% | 15.072<br>04 | 73  | 73.84% | 12.66<br>082 | Pigu              |
| 100336 | 2041 | 87 | 77.66% | 11.970<br>49 | 54  | 55.71% | 7.438<br>286 | Ppp1r8            |
| 243197 | 2508 | 87 | 68.14% | 9.7415<br>36 | 98  | 72.41% | 10.98<br>552 | Mfsd7a            |
| 55948  | 1616 | 87 | 76.98% | 15.118<br>67 | 50  | 72.09% | 8.698<br>628 | Sfn               |
| 22722  | 2770 | 87 | 70.65% | 8.8201<br>34 | 79  | 70.90% | 8.018<br>063 | Zfp64             |
| 65019  | 1064 | 87 | 55.92% | 22.962<br>19 | 106 | 50.47% | 28.00<br>827 | Rpl23             |
| 72727  | 1599 | 87 | 78.36% | 15.279<br>41 | 67  | 74.23% | 11.78<br>009 | B3gat3            |
| 241846 | 2560 | 87 | 68.98% | 9.5436<br>61 | 61  | 54.77% | 6.699<br>031 | Lsm14b            |
| 27081  | 6400 | 87 | 45.73% | 3.8174<br>64 | 62  | 31.34% | 2.723<br>54  | Zfp275            |
| 236733 | 3464 | 86 | 60.68% | 6.9719<br>82 | 47  | 46.62% | 3.814<br>539 | Usp11             |
| 67603  | 2814 | 86 | 63.89% | 8.5824<br>26 | 66  | 62.65% | 6.593<br>894 | Dusp6             |
| 66460  | 1623 | 86 | 76.40% | 14.880<br>44 | 67  | 72.27% | 11.60<br>589 | Sys1              |
| 66980  | 2298 | 86 | 72.02% | 10.509<br>55 | 59  | 59.88% | 7.218<br>12  | Zdhhc6            |
| 109284 | 1821 | 86 | 82.98% | 13.262<br>46 | 95  | 89.90% | 14.66<br>681 | C030046<br>I01Rik |



|                                  |      |    |        |              |     |        |              |          |
|----------------------------------|------|----|--------|--------------|-----|--------|--------------|----------|
| 12337                            | 4411 | 86 | 56.79% | 5.4751<br>64 | 91  | 60.53% | 5.799<br>979 | Capn5    |
| 73825                            | 3151 | 86 | 66.74% | 7.6645<br>34 | 69  | 62.20% | 6.156<br>343 | Klraql   |
| gi 114158676 ref N<br>M_028190.2 | 4993 | 86 | 43.74% | 4.8369<br>61 | 71  | 42.16% | 3.997<br>78  | -        |
| 77048                            | 3006 | 86 | 72.19% | 8.0342<br>47 | 71  | 56.82% | 6.640<br>358 | Ccdc41   |
| 13821                            | 6308 | 86 | 42.63% | 3.8286<br>22 | 120 | 53.69% | 5.348<br>25  | Epb4.111 |
| 69890                            | 2938 | 86 | 67.80% | 8.2202       | 59  | 53.68% | 5.645<br>759 | Zfp219   |
| 17434                            | 1889 | 86 | 66.33% | 12.785<br>04 | 114 | 64.69% | 16.96<br>661 | Mocs2    |
| 140500                           | 4438 | 86 | 54.44% | 5.4418<br>54 | 79  | 49.66% | 5.004<br>514 | Acap3    |
| 319880                           | 5528 | 86 | 43.65% | 4.3688<br>4  | 108 | 56.26% | 5.492<br>598 | Tmcc3    |
| 19286                            | 1051 | 86 | 88.87% | 22.979<br>02 | 71  | 81.92% | 18.99<br>231 | Pts      |
| 23971                            | 2617 | 86 | 74.13% | 9.2284<br>86 | 95  | 64.16% | 10.20<br>568 | Papss1   |
| 19826                            | 1934 | 86 | 38.73% | 12.487<br>56 | 74  | 36.61% | 10.75<br>715 | Rnps1    |
| 67057                            | 2318 | 86 | 60.91% | 10.418<br>87 | 76  | 60.09% | 9.217<br>694 | Yaf2     |
| 21990                            | 2047 | 86 | 65.71% | 11.798<br>22 | 26  | 41.87% | 3.570<br>899 | Tph1     |
| 229211                           | 3913 | 86 | 48.33% | 6.1719<br>77 | 58  | 31.05% | 4.167<br>161 | Acad9    |
| 57751                            | 1491 | 86 | 80.75% | 16.197<br>82 | 82  | 74.38% | 15.46<br>174 | Rnf25    |
| 67381                            | 1304 | 86 | 81.90% | 18.520<br>66 | 94  | 87.42% | 20.26<br>62  | Med4     |
| 72739                            | 2603 | 86 | 70.46% | 9.2781<br>2  | 51  | 50.29% | 5.508<br>307 | Zkscan3  |
| 12396                            | 6100 | 86 | 46.36% | 3.9591<br>72 | 41  | 26.80% | 1.889<br>627 | Cbfa2t2  |
| 66480                            | 1857 | 86 | 54.07% | 13.005<br>36 | 98  | 52.93% | 14.83<br>666 | Rpl15    |
| 69956                            | 2601 | 86 | 64.63% | 9.2852<br>54 | 68  | 66.63% | 7.350<br>057 | Ptcd3    |
| 17256                            | 841  | 86 | 80.38% | 28.716<br>94 | 76  | 80.86% | 25.40<br>62  | Mea1     |

|                                  |      |    |        |              |     |        |              |              |
|----------------------------------|------|----|--------|--------------|-----|--------|--------------|--------------|
| gi 253795501 ref N<br>M_172262.2 | 4281 | 86 | 57.95% | 5.6414<br>26 | 65  | 46.09% | 4.268<br>647 | -            |
| 55991                            | 2112 | 85 | 70.41% | 11.302<br>14 | 53  | 57.05% | 7.055<br>115 | Panx1        |
| 15260                            | 4553 | 85 | 45.57% | 5.2427<br>24 | 69  | 44.87% | 4.260<br>627 | Hira         |
| 140917                           | 4309 | 85 | 57.23% | 5.5395<br>97 | 92  | 60.48% | 6.002<br>518 | Delre1b      |
| 74125                            | 4628 | 85 | 51.60% | 5.1577<br>62 | 74  | 45.96% | 4.495<br>319 | Armc8        |
| 70472                            | 5683 | 85 | 44.38% | 4.2002<br>68 | 44  | 28.37% | 2.176<br>693 | Atad2        |
| 66410                            | 1486 | 85 | 74.76% | 16.063<br>34 | 78  | 76.31% | 14.75<br>699 | Mterfd1      |
| gi 169646699 ref N<br>M_138590.3 | 2511 | 85 | 48.90% | 9.5062<br>21 | 56  | 39.35% | 6.269<br>941 | -            |
| 17076                            | 5172 | 85 | 51.45% | 4.6152<br>59 | 15  | 13.13% | 0.815<br>37  | Ly75         |
| 234388                           | 911  | 85 | 94.73% | 26.202<br>11 | 73  | 88.58% | 22.52<br>821 | Ccdc124      |
| 229285                           | 4013 | 85 | 59.38% | 5.9481<br>99 | 76  | 53.43% | 5.324<br>349 | Spg20        |
| 108995                           | 1781 | 85 | 82.31% | 13.402<br>65 | 47  | 64.40% | 7.419<br>183 | Tbc1d10<br>c |
| gi 142371690 ref N<br>M_153414.3 | 2668 | 85 | 63.98% | 8.9468<br>22 | 70  | 67.47% | 7.376<br>228 | -            |
| 215748                           | 3448 | 85 | 63.34% | 6.9228<br>89 | 102 | 64.70% | 8.316<br>777 | Cnksr3       |
| 170762                           | 6420 | 85 | 45.05% | 3.7180<br>88 | 64  | 36.93% | 2.802<br>638 | Nup155       |
| 14593                            | 2387 | 85 | 55.97% | 10.000<br>05 | 58  | 49.52% | 6.831<br>211 | Ggps1        |
| 94043                            | 1080 | 85 | 66.85% | 22.101<br>96 | 83  | 66.30% | 21.60<br>61  | Tm2d1        |
| 217201                           | 3230 | 85 | 63.59% | 7.3901<br>31 | 65  | 54.15% | 5.657<br>609 | Rundc1       |
| 17151                            | 1572 | 85 | 86.58% | 15.184<br>56 | 75  | 83.84% | 13.41<br>315 | Ccndbp1      |
| 64656                            | 1302 | 85 | 81.34% | 18.333<br>43 | 65  | 75.96% | 14.03<br>539 | Mrps23       |
| 207818                           | 1137 | 85 | 73.44% | 20.993<br>95 | 95  | 83.82% | 23.49<br>012 | Smagp        |
| gi 158508633 ref N<br>M_023647.5 | 3625 | 85 | 37.27% | 6.5848<br>61 | 88  | 40.86% | 6.824<br>908 | -            |

|                              |       |    |        |              |     |        |              |        |
|------------------------------|-------|----|--------|--------------|-----|--------|--------------|--------|
| gi 149259582 ref XR_033905.1 | 10650 | 85 | 23.07% | 2.2413<br>26 | 48  | 14.25% | 1.267<br>108 | -      |
| 77559                        | 9625  | 85 | 26.92% | 2.4800<br>13 | 62  | 21.10% | 1.810<br>978 | Ag1    |
| 27878                        | 2159  | 85 | 66.79% | 11.056<br>1  | 66  | 68.23% | 8.594<br>357 | Tada1  |
| 14082                        | 2871  | 85 | 69.49% | 8.3142<br>19 | 69  | 64.05% | 6.756<br>753 | Fadd   |
| 66234                        | 1824  | 85 | 81.30% | 13.086<br>69 | 60  | 69.24% | 9.248<br>015 | Sc4mol |
| 66448                        | 665   | 85 | 88.72% | 35.894<br>92 | 90  | 90.83% | 38.04<br>898 | Mrpl20 |
| 103468                       | 3092  | 85 | 70.05% | 7.7199<br>62 | 70  | 61.38% | 6.364<br>74  | Nup107 |
| 54636                        | 1582  | 85 | 86.28% | 15.088<br>57 | 68  | 77.12% | 12.08<br>438 | Wdr45  |
| 23832                        | 4453  | 85 | 31.19% | 5.3604<br>59 | 207 | 38.06% | 13.06<br>892 | Xcr1   |
| 67337                        | 1820  | 85 | 85.11% | 13.115<br>45 | 61  | 74.95% | 9.422<br>813 | Cstf1  |
| 12499                        | 4990  | 85 | 52.67% | 4.7835<br>92 | 70  | 45.49% | 3.943<br>843 | Entpd5 |
| 30841                        | 5184  | 84 | 41.24% | 4.5504<br>04 | 32  | 20.97% | 1.735<br>43  | Kdm2b  |
| 74412                        | 3138  | 84 | 61.41% | 7.5173<br>03 | 65  | 59.46% | 5.823<br>479 | Gle1   |
| gi 42475995 ref NM_178619.3  | 3165  | 84 | 57.03% | 7.4531<br>74 | 69  | 54.66% | 6.129<br>111 | -      |
| 381379                       | 2075  | 84 | 74.89% | 11.368<br>34 | 70  | 66.41% | 9.484<br>23  | Med19  |
| 217449                       | 3394  | 84 | 65.23% | 6.9502<br>94 | 62  | 48.70% | 5.135<br>727 | Ttc15  |
| 22346                        | 2730  | 84 | 69.78% | 8.6407<br>68 | 52  | 49.27% | 5.355<br>041 | Vhl    |
| 317758                       | 1383  | 84 | 90.67% | 17.056<br>61 | 60  | 80.04% | 12.19<br>695 | Gimap9 |
| 24116                        | 2162  | 84 | 70.81% | 10.910<br>87 | 74  | 71.42% | 9.622<br>727 | Whsc2  |
| 70297                        | 6528  | 84 | 45.59% | 3.6135<br>57 | 52  | 31.05% | 2.239<br>47  | Gcc2   |
| 474156                       | 2804  | 84 | 63.84% | 8.4127<br>31 | 48  | 45.11% | 4.812<br>662 | Zbtb9  |
| 244631                       | 3317  | 84 | 61.14% | 7.1116<br>36 | 35  | 40.58% | 2.966<br>502 | Pskh1  |

|                              |      |    |        |              |     |        |              |                   |
|------------------------------|------|----|--------|--------------|-----|--------|--------------|-------------------|
| 57781                        | 1891 | 84 | 78.32% | 12.474<br>51 | 58  | 56.58% | 8.623<br>004 | Cd200r1           |
| 320678                       | 2840 | 84 | 67.61% | 8.3060<br>9  | 59  | 53.56% | 5.840<br>577 | Iffo1             |
| gi 149262669 ref XR_032210.1 | 4862 | 84 | 44.01% | 4.8517<br>68 | 41  | 25.32% | 2.370<br>779 | -                 |
| 60441                        | 1411 | 84 | 79.94% | 16.718<br>14 | 63  | 74.63% | 12.55<br>266 | Mrpl38            |
| 22367                        | 3796 | 84 | 43.57% | 6.2142<br>51 | 76  | 42.60% | 5.628<br>718 | Vrk1              |
| 193740                       | 2798 | 84 | 35.63% | 8.4307<br>71 | 80  | 39.21% | 8.038<br>303 | Hspa1a            |
| 20220                        | 3472 | 84 | 50.23% | 6.7941<br>52 | 111 | 50.58% | 8.988<br>048 | Sap18             |
| 66209                        | 3221 | 84 | 71.25% | 7.3235<br>94 | 64  | 57.71% | 5.586<br>134 | 1110054<br>O05Rik |
| 233812                       | 4842 | 84 | 44.28% | 4.8718<br>09 | 74  | 42.48% | 4.296<br>641 | BC0303<br>36      |
| 56334                        | 2029 | 84 | 19.81% | 11.626<br>07 | 101 | 17.94% | 13.99<br>463 | Tmed2             |
| gi 112807188 ref NM_029922.2 | 2633 | 84 | 72.96% | 8.9590<br>95 | 76  | 64.83% | 8.114<br>931 | -                 |
| 11465                        | 1931 | 84 | 3.16%  | 12.216<br>1  | 80  | 3.26%  | 11.64<br>742 | Actg1             |
| 13722                        | 1122 | 84 | 85.29% | 21.024<br>33 | 89  | 88.41% | 22.30<br>074 | Aimp1             |
| 70428                        | 4858 | 84 | 52.98% | 4.8557<br>63 | 67  | 45.99% | 3.877<br>389 | Polr3b            |
| 19060                        | 2084 | 84 | 79.17% | 11.319<br>24 | 80  | 71.69% | 10.79<br>231 | Ppp5c             |
| 107734                       | 691  | 84 | 97.40% | 34.137<br>91 | 85  | 91.03% | 34.58<br>303 | Mrpl30            |
| 19241                        | 670  | 84 | 8.36%  | 35.207<br>91 | 91  | 8.21%  | 38.18<br>464 | Tmsb4x            |
| 17220                        | 2396 | 84 | 78.59% | 9.8452<br>82 | 65  | 61.81% | 7.626<br>911 | Mcm7              |
| 108011                       | 6524 | 84 | 38.83% | 3.6157<br>72 | 52  | 28.71% | 2.240<br>843 | Ap4e1             |
| 13121                        | 4353 | 84 | 51.23% | 5.4190<br>9  | 53  | 41.63% | 3.423<br>019 | Cyp51             |
| 77781                        | 7273 | 84 | 41.34% | 3.2434<br>07 | 50  | 24.46% | 1.932<br>763 | Epm2aip<br>1      |
| 192197                       | 3692 | 84 | 55.72% | 6.3893       | 73  | 53.41% | 5.558<br>829 | Bcas3             |

|                                  |      |    |        |              |    |        |              |                   |
|----------------------------------|------|----|--------|--------------|----|--------|--------------|-------------------|
| 15185                            | 4142 | 84 | 53.69% | 5.6951<br>47 | 59 | 42.06% | 4.004<br>645 | Hdac6             |
| gi 142379932 ref N<br>M_145550.2 | 1268 | 84 | 95.35% | 18.603<br>55 | 90 | 92.98% | 19.95<br>471 | -                 |
| 66414                            | 561  | 84 | 89.48% | 42.048<br>66 | 89 | 94.12% | 44.60<br>148 | Ndufa12           |
| 19358                            | 2074 | 84 | 51.88% | 11.373<br>82 | 77 | 54.29% | 10.43<br>768 | Rad23a            |
| 19240                            | 637  | 84 | 24.02% | 37.031<br>86 | 54 | 24.96% | 23.83<br>288 | Tmsb10            |
| 74901                            | 6996 | 84 | 33.63% | 3.3718<br>26 | 22 | 14.02% | 0.884<br>087 | Kbtbd11           |
| 21374                            | 1842 | 84 | 88.87% | 12.806<br>35 | 54 | 73.62% | 8.241<br>879 | Tbp               |
| gi 22165348 ref N<br>M_012039.1  | 2866 | 83 | 70.80% | 8.1327<br>54 | 57 | 50.84% | 5.591<br>403 | -                 |
| 19336                            | 1865 | 83 | 52.28% | 12.497<br>84 | 75 | 66.76% | 11.30<br>588 | Rab24             |
| 66416                            | 482  | 83 | 97.72% | 48.357<br>83 | 87 | 98.13% | 50.74<br>513 | Ndufa7            |
| 209354                           | 1938 | 83 | 63.93% | 12.027<br>08 | 45 | 51.39% | 6.528<br>011 | Eif2b1            |
| 235315                           | 3782 | 83 | 53.28% | 6.1630<br>02 | 63 | 46.06% | 4.683<br>183 | Rnf214            |
| 69106                            | 2284 | 83 | 68.48% | 10.205<br>11 | 47 | 58.93% | 5.785<br>273 | Stom11            |
| 207259                           | 4591 | 83 | 50.60% | 5.0769<br>92 | 61 | 38.84% | 3.735<br>465 | Zbtb7c            |
| 54188                            | 1605 | 83 | 77.38% | 14.522<br>41 | 87 | 85.48% | 15.23<br>935 | Cpsf4             |
| 75210                            | 1970 | 83 | 75.79% | 11.831<br>71 | 73 | 65.84% | 10.41<br>787 | Prr3              |
| 56282                            | 963  | 83 | 93.87% | 24.204<br>02 | 78 | 96.78% | 22.77<br>144 | Mrpl12            |
| 20768                            | 2206 | 83 | 63.92% | 10.565<br>94 | 80 | 70.67% | 10.19<br>545 | Sephs2            |
| 259302                           | 8887 | 83 | 33.12% | 2.6227<br>6  | 86 | 31.81% | 2.720<br>604 | Srgap3            |
| 68108                            | 3175 | 83 | 54.83% | 7.3412<br>51 | 75 | 54.68% | 6.641<br>094 | 9430008<br>C03Rik |
| 71957                            | 2347 | 83 | 73.41% | 9.9311<br>77 | 65 | 64.29% | 7.786<br>143 | Cpsf31            |
| 80751                            | 1980 | 83 | 77.58% | 11.771<br>96 | 55 | 66.21% | 7.809<br>435 | Rnf34             |

|                                     |      |    |        |              |     |        |              |                   |
|-------------------------------------|------|----|--------|--------------|-----|--------|--------------|-------------------|
| 67414                               | 4531 | 83 | 49.26% | 5.1442<br>22 | 60  | 39.51% | 3.722<br>882 | Mfn1              |
| 12166                               | 5481 | 83 | 49.61% | 4.2525<br>95 | 77  | 42.31% | 3.949<br>599 | Bmpr1a            |
| 104709                              | 3237 | 83 | 63.55% | 7.2006<br>4  | 84  | 64.94% | 7.295<br>561 | Pik3r6            |
| 65962                               | 2118 | 83 | 68.60% | 11.004<br>94 | 85  | 69.41% | 11.28<br>275 | Slc9a3r2          |
| 20112                               | 5435 | 83 | 43.75% | 4.2885<br>87 | 77  | 36.34% | 3.983<br>027 | Rps6ka2           |
| gi 149254450 ref X<br>M_001479354.1 | 3050 | 83 | 45.74% | 7.6421<br>22 | 69  | 41.51% | 6.360<br>209 | -                 |
| 1E+08                               | 2195 | 83 | 10.93% | 10.618<br>89 | 70  | 8.93%  | 8.965<br>73  | Gm4569            |
| 229900                              | 5548 | 83 | 34.34% | 4.2012<br>39 | 53  | 28.19% | 2.685<br>725 | Gbp7              |
| 13024                               | 1373 | 83 | 62.78% | 16.976<br>31 | 168 | 73.85% | 34.40<br>019 | Ctla2a            |
| 21414                               | 2238 | 83 | 80.38% | 10.414<br>87 | 16  | 28.46% | 2.009<br>935 | Tcf7              |
| 207781                              | 6568 | 82 | 41.84% | 3.5060<br>36 | 82  | 33.12% | 3.509<br>965 | C2cd2             |
| 72201                               | 3311 | 82 | 56.66% | 6.9548<br>92 | 69  | 49.62% | 5.858<br>845 | Otud6b            |
| 77254                               | 1144 | 82 | 93.88% | 20.129<br>06 | 76  | 87.41% | 18.67<br>711 | Yif1b             |
| 18647                               | 4911 | 82 | 49.62% | 4.6889<br>93 | 81  | 50.05% | 4.637<br>001 | Cdk14             |
| 11484                               | 1534 | 82 | 90.81% | 15.011<br>5  | 141 | 95.24% | 25.84<br>139 | Aspa              |
| 72662                               | 3722 | 82 | 54.54% | 6.1869<br>01 | 56  | 44.17% | 4.229<br>936 | Dis3              |
| 109079                              | 5329 | 82 | 44.55% | 4.3211<br>95 | 57  | 30.87% | 3.007<br>123 | Sephs1            |
| 243983                              | 2407 | 82 | 70.25% | 9.5669<br>49 | 65  | 57.08% | 7.592<br>056 | Zdhhc13           |
| 83965                               | 2558 | 82 | 74.94% | 9.0022<br>08 | 132 | 82.21% | 14.50<br>76  | Enpp5             |
| 192232                              | 2852 | 82 | 67.64% | 8.0742<br>1  | 58  | 62.90% | 5.717<br>426 | Hps4              |
| 66916                               | 533  | 82 | 95.68% | 43.203<br>84 | 75  | 90.62% | 39.55<br>999 | Ndufb7            |
| 72325                               | 2795 | 82 | 71.45% | 8.2388<br>72 | 48  | 50.73% | 4.828<br>159 | 1300018<br>I17Rik |

|        |      |    |        |              |     |        |              |                   |
|--------|------|----|--------|--------------|-----|--------|--------------|-------------------|
| 319604 | 6610 | 82 | 41.74% | 3.4837<br>59 | 100 | 44.63% | 4.253<br>248 | Fam168a           |
| 12909  | 1474 | 82 | 75.10% | 15.622<br>56 | 49  | 67.64% | 9.345<br>891 | Crcp              |
| 68146  | 3541 | 82 | 60.15% | 6.5031<br>48 | 76  | 52.33% | 6.034<br>062 | Arl13b            |
| 98711  | 2295 | 82 | 67.23% | 10.033<br>83 | 62  | 68.58% | 7.595<br>058 | Rdh10             |
| 121022 | 795  | 82 | 80.25% | 28.965<br>59 | 102 | 81.89% | 36.07<br>075 | Mrps6             |
| 244650 | 7854 | 82 | 37.45% | 2.9319<br>64 | 54  | 26.22% | 1.932<br>969 | Phlpp2            |
| 77065  | 3252 | 82 | 63.78% | 7.0810<br>72 | 56  | 48.37% | 4.841<br>273 | Ints7             |
| 71923  | 1802 | 82 | 82.19% | 12.778<br>94 | 82  | 69.64% | 12.79<br>326 | 2310047<br>M10Rik |
| 1E+08  | 756  | 82 | 72.09% | 30.459<br>85 | 342 | 89.42% | 127.1<br>822 | Isg15             |
| 216527 | 1875 | 82 | 41.81% | 12.281<br>41 | 78  | 36.05% | 11.69<br>541 | Ccm2              |
| 140482 | 1999 | 82 | 76.79% | 11.519<br>58 | 52  | 55.78% | 7.313<br>288 | Zfp358            |
| 70574  | 5195 | 82 | 56.42% | 4.4326<br>56 | 70  | 41.66% | 3.788<br>215 | Cpm               |
| 70450  | 3967 | 82 | 59.09% | 5.8048<br>01 | 51  | 43.84% | 3.614<br>349 | Unc13d            |
| 213773 | 2515 | 82 | 79.05% | 9.1561<br>22 | 56  | 55.83% | 6.259<br>969 | Tbl3              |
| 19687  | 4731 | 82 | 50.88% | 4.8673<br>95 | 53  | 37.54% | 3.149<br>525 | Rfc1              |
| 80732  | 4171 | 82 | 53.18% | 5.5208<br>94 | 67  | 41.79% | 4.516<br>029 | Mynn              |
| 12617  | 3192 | 82 | 65.26% | 7.2141<br>75 | 47  | 46.62% | 4.139<br>588 | Cenpc1            |
| 269823 | 1784 | 82 | 74.61% | 12.907<br>87 | 96  | 88.57% | 15.12<br>859 | Pon3              |
| 15108  | 938  | 82 | 91.79% | 24.549<br>73 | 85  | 89.34% | 25.47<br>641 | Hsd17b1<br>0      |
| 66385  | 3653 | 82 | 53.08% | 6.3037<br>63 | 56  | 44.18% | 4.309<br>833 | Ppp1r7            |
| 67442  | 1942 | 82 | 83.21% | 11.857<br>7  | 69  | 78.94% | 9.988<br>999 | Retsat            |
| 24001  | 6144 | 82 | 41.52% | 3.7479<br>89 | 40  | 18.99% | 1.830<br>336 | Tiam2             |

|                                     |      |    |        |              |     |        |              |                   |
|-------------------------------------|------|----|--------|--------------|-----|--------|--------------|-------------------|
| 56515                               | 3110 | 82 | 46.72% | 7.4043<br>88 | 73  | 51.22% | 6.599<br>098 | Rnf138            |
| 68505                               | 2631 | 82 | 68.23% | 8.7524<br>31 | 93  | 75.07% | 9.937<br>662 | Vps51             |
| 12585                               | 2525 | 82 | 66.02% | 9.1198<br>6  | 102 | 79.33% | 11.35<br>693 | Cdr2              |
| 13666                               | 4512 | 81 | 9.35%  | 5.0414<br>06 | 53  | 9.33%  | 3.302<br>394 | Eif2ak3           |
| gi 149258395 ref X<br>M_001476645.1 | 8297 | 81 | 29.48% | 2.7415<br>72 | 128 | 32.93% | 4.337<br>215 | -                 |
| gi 226443056 ref N<br>M_027389.2    | 7536 | 81 | 26.88% | 3.0184<br>21 | 63  | 21.51% | 2.350<br>292 | -                 |
| 1E+08                               | 606  | 81 | 52.81% | 37.536<br>01 | 95  | 54.46% | 44.07<br>305 | Snhg12            |
| 104156                              | 3847 | 81 | 59.16% | 5.9128<br>73 | 76  | 59.60% | 5.554<br>098 | Etv5              |
| 94067                               | 1213 | 81 | 85.24% | 18.752<br>53 | 76  | 78.65% | 17.61<br>469 | Mrpl43            |
| 55963                               | 3926 | 81 | 59.35% | 5.7938<br>93 | 76  | 52.24% | 5.442<br>337 | Slc1a4            |
| 11546                               | 1834 | 81 | 86.59% | 12.402<br>85 | 45  | 57.80% | 6.898<br>192 | Parp2             |
| 74015                               | 3399 | 81 | 67.20% | 6.6922<br>1  | 31  | 32.19% | 2.564<br>086 | Fcho1             |
| 217830                              | 3229 | 81 | 65.28% | 7.0445<br>41 | 41  | 45.18% | 3.569<br>751 | 9030617<br>O03Rik |
| 67197                               | 826  | 81 | 84.50% | 27.538<br>53 | 114 | 84.75% | 38.80<br>136 | Zcrb1             |
| 60364                               | 2336 | 81 | 76.58% | 9.7375<br>09 | 70  | 68.88% | 8.424<br>562 | Donson            |
| 319748                              | 3958 | 81 | 62.53% | 5.7470<br>5  | 65  | 50.58% | 4.616<br>998 | Zfp865            |
| 68205                               | 2143 | 81 | 57.30% | 10.614<br>48 | 82  | 58.05% | 10.75<br>756 | Urm1              |
| 23986                               | 1609 | 81 | 68.05% | 14.137<br>24 | 73  | 74.52% | 12.75<br>525 | Eci2              |
| 216543                              | 4810 | 81 | 51.21% | 4.7290<br>69 | 48  | 37.01% | 2.805<br>552 | Cep68             |
| 80509                               | 1845 | 81 | 57.94% | 12.328<br>9  | 72  | 59.67% | 10.97<br>13  | Med8              |
| 68591                               | 2884 | 81 | 66.12% | 7.8872<br>48 | 66  | 69.52% | 6.433<br>848 | Mocos             |
| 66897                               | 3911 | 81 | 56.12% | 5.8161<br>14 | 76  | 52.34% | 5.463<br>21  | Naa16             |



|                                  |      |    |        |              |     |        |              |                   |
|----------------------------------|------|----|--------|--------------|-----|--------|--------------|-------------------|
| 67269                            | 4389 | 81 | 54.11% | 5.1826<br>89 | 59  | 39.71% | 3.779<br>275 | Agtppb1           |
| gi 120444901 ref N<br>R_003280.1 | 158  | 81 | 68.35% | 143.96<br>72 | 22  | 66.46% | 39.14<br>603 | -                 |
| 243905                           | 7202 | 81 | 37.93% | 3.1584<br>03 | 58  | 28.06% | 2.264<br>107 | Zfp568            |
| 20499                            | 5131 | 81 | 52.08% | 4.4332<br>14 | 57  | 39.84% | 3.123<br>165 | Slc12a7           |
| 52206                            | 2668 | 81 | 71.93% | 8.5257<br>95 | 54  | 52.74% | 5.690<br>233 | Anapc4            |
| 104725                           | 1363 | 81 | 77.70% | 16.688<br>79 | 88  | 77.62% | 18.15<br>135 | Sptssa            |
| 52837                            | 5162 | 81 | 47.25% | 4.4065<br>91 | 56  | 35.68% | 3.049<br>946 | Tmx4              |
| 72108                            | 4267 | 81 | 55.66% | 5.3308<br>7  | 60  | 43.80% | 3.953<br>218 | Ddhd2             |
| 70620                            | 5892 | 81 | 32.48% | 3.8606<br>28 | 70  | 28.14% | 3.340<br>084 | Ube2v2            |
| 227743                           | 3044 | 81 | 61.70% | 7.4726<br>75 | 85  | 60.64% | 7.850<br>483 | Mapkap1           |
| 57321                            | 3599 | 81 | 54.54% | 6.3203<br>17 | 76  | 53.71% | 5.936<br>82  | Terf2ip           |
| 235184                           | 2307 | 81 | 75.81% | 9.8599<br>14 | 74  | 62.90% | 9.017<br>917 | BC0244<br>79      |
| 104009                           | 3399 | 81 | 54.57% | 6.6922<br>1  | 78  | 52.16% | 6.451<br>572 | Qsox1             |
| 56470                            | 1457 | 81 | 36.93% | 15.612<br>09 | 57  | 33.56% | 10.99<br>86  | Rgs19             |
| 66520                            | 1803 | 81 | 56.35% | 12.616<br>1  | 98  | 64%    | 15.28<br>102 | 2610001<br>J05Rik |
| 104806                           | 7775 | 81 | 37.07% | 2.9256<br>36 | 77  | 33.27% | 2.784<br>277 | Fancm             |
| 18590                            | 1019 | 81 | 95.78% | 22.322<br>69 | 186 | 93.13% | 51.31<br>695 | Pdgfa             |
| 20937                            | 3116 | 81 | 63.32% | 7.3000<br>07 | 68  | 49.78% | 6.135<br>269 | Suv39h1           |
| 28030                            | 2598 | 80 | 65.70% | 8.6474<br>2  | 73  | 67.17% | 7.899<br>613 | Gfm1              |
| 270118                           | 6548 | 80 | 42.07% | 3.4309<br>71 | 102 | 49.50% | 4.379<br>39  | Mam12             |
| 24070                            | 1314 | 80 | 55.18% | 17.097<br>41 | 69  | 57.31% | 14.76<br>304 | Mpdu1             |
| 20133                            | 3997 | 80 | 47.94% | 5.6207<br>15 | 47  | 36.48% | 3.305<br>87  | Rrm1              |

|                                  |      |    |        |              |     |        |              |                   |
|----------------------------------|------|----|--------|--------------|-----|--------|--------------|-------------------|
| gi 146141136 ref N<br>M_028835.3 | 3059 | 80 | 44.75% | 7.3442<br>29 | 100 | 43.64% | 9.190<br>574 | -                 |
| 16706                            | 4087 | 80 | 58.70% | 5.4969<br>41 | 47  | 37.26% | 3.233<br>072 | Ksr1              |
| 12632                            | 2940 | 80 | 58.81% | 7.6414<br>96 | 55  | 49.12% | 5.259<br>415 | Cfl2              |
| 66165                            | 1260 | 80 | 75.71% | 17.830<br>16 | 95  | 77.78% | 21.19<br>704 | Bccip             |
| gi 142362668 ref N<br>M_144833.2 | 2373 | 80 | 74.25% | 9.4673<br>4  | 79  | 74.13% | 9.359<br>475 | -                 |
| 226610                           | 4986 | 80 | 49.44% | 4.5058<br>16 | 60  | 41.76% | 3.383<br>149 | Fam78b            |
| 27103                            | 5220 | 80 | 47.91% | 4.3038<br>31 | 35  | 27.57% | 1.885<br>036 | Eif2ak4           |
| 70257                            | 365  | 80 | 89.32% | 61.550<br>68 | 100 | 92.88% | 77.02<br>456 | 2010107<br>E04Rik |
| 503610                           | 2847 | 80 | 41.55% | 7.8911<br>12 | 66  | 36.32% | 6.517<br>463 | Zdhc18            |
| 12041                            | 2857 | 80 | 56.46% | 7.8634<br>92 | 72  | 53.73% | 7.085<br>074 | Bckdk             |
| 320782                           | 3342 | 80 | 59.22% | 6.7223<br>21 | 63  | 45%    | 5.299<br>76  | Tmem15<br>4       |
| 70350                            | 1855 | 80 | 36.17% | 12.111<br>05 | 60  | 28.52% | 9.093<br>466 | Basp1             |
| 109006                           | 4327 | 80 | 40.58% | 5.1920<br>49 | 77  | 30.30% | 5.002<br>948 | Ciapin1           |
| 74111                            | 4008 | 80 | 48.45% | 5.6052<br>89 | 72  | 57.14% | 5.050<br>413 | Rbm19             |
| 20975                            | 5051 | 80 | 51.18% | 4.4478<br>32 | 69  | 43.63% | 3.840<br>554 | Synj2             |
| 66815                            | 1332 | 80 | 77.78% | 16.866<br>36 | 84  | 75.68% | 17.72<br>953 | Ccdc109<br>b      |
| 23938                            | 2258 | 80 | 77.28% | 9.9495<br>12 | 61  | 66.21% | 7.595<br>004 | Map2k5            |
| 57370                            | 1998 | 80 | 74.52% | 11.244<br>24 | 97  | 82.13% | 13.64<br>892 | B4galt3           |
| gi 110626164 ref N<br>M_133985.1 | 1921 | 80 | 79.91% | 11.694<br>95 | 46  | 61.17% | 6.732<br>131 | -                 |
| 18020                            | 3388 | 80 | 53.10% | 6.6310<br>5  | 44  | 39.32% | 3.651<br>164 | Nfatc2ip          |
| 66526                            | 6243 | 80 | 31.83% | 3.5985<br>9  | 65  | 23.02% | 2.927<br>131 | Tdeanc2           |
| 13860                            | 4402 | 80 | 32.78% | 5.1035<br>89 | 91  | 35.62% | 5.811<br>838 | Eps8              |

|                                  |      |    |        |              |    |        |              |        |
|----------------------------------|------|----|--------|--------------|----|--------|--------------|--------|
| 102115                           | 1455 | 80 | 78.56% | 15.440<br>55 | 76 | 84.88% | 14.68<br>496 | Dohh   |
| 66091                            | 349  | 80 | 95.42% | 64.372<br>48 | 93 | 94.56% | 74.91<br>687 | Ndufa3 |
| gi 118129804 ref N<br>M_133878.2 | 2196 | 80 | 76.87% | 10.230<br>42 | 74 | 76.78% | 9.473<br>741 | -      |
| 380912                           | 4229 | 79 | 56.61% | 5.2459<br>62 | 58 | 39.32% | 3.855<br>782 | Zfp395 |
| 12168                            | 3507 | 79 | 64.73% | 6.3259<br>69 | 26 | 30.42% | 2.084<br>297 | Bmpr2  |
| 21848                            | 4053 | 79 | 54.75% | 5.4737<br>66 | 43 | 36.39% | 2.982<br>73  | Trim24 |
| 666311                           | 1996 | 79 | 81.16% | 11.114<br>82 | 62 | 77.56% | 8.732<br>795 | Zfp498 |
| 320806                           | 4486 | 79 | 40.88% | 4.9454<br>24 | 47 | 29.38% | 2.945<br>511 | Gfm2   |
| 20931                            | 1170 | 79 | 73.76% | 18.961<br>69 | 93 | 81.37% | 22.34<br>7   | Surf2  |
| 16633                            | 1886 | 79 | 77.31% | 11.763<br>08 | 88 | 76.56% | 13.11<br>786 | Klra2  |
| 74205                            | 3950 | 79 | 46.56% | 5.6164<br>99 | 97 | 54.86% | 6.903<br>936 | Acs13  |
| 270198                           | 3377 | 79 | 56.29% | 6.5694<br>91 | 60 | 46.99% | 4.995<br>078 | Pfkfb4 |
| 56771                            | 2040 | 79 | 70.25% | 10.875<br>08 | 65 | 69.90% | 8.957<br>881 | Med20  |
| 56210                            | 4279 | 79 | 50.74% | 5.1846<br>63 | 57 | 38.79% | 3.745<br>025 | Rev1   |
| 83669                            | 4169 | 79 | 56.27% | 5.3214<br>61 | 56 | 40.25% | 3.776<br>402 | Wdr6   |
| 23908                            | 4811 | 79 | 46.17% | 4.6113<br>43 | 60 | 42.11% | 3.506<br>211 | Hs2st1 |
| 55992                            | 2955 | 79 | 61.32% | 7.5076<br>72 | 42 | 40.07% | 3.995<br>894 | Trim3  |
| 56249                            | 2121 | 79 | 78.03% | 10.459<br>77 | 61 | 71%    | 8.085<br>582 | Actr8  |
| 66384                            | 889  | 79 | 84.03% | 24.955<br>2  | 94 | 77.28% | 29.72<br>68  | Srp19  |
| 67619                            | 1647 | 79 | 82.21% | 13.470<br>05 | 75 | 76.20% | 12.80<br>235 | Nob1   |
| 20737                            | 3741 | 79 | 59.88% | 5.9302<br>79 | 21 | 20.85% | 1.578<br>17  | Spn    |
| 71974                            | 2495 | 79 | 72.02% | 8.8918<br>53 | 61 | 65.97% | 6.873<br>555 | Prmt3  |

|        |      |    |        |              |     |        |              |               |
|--------|------|----|--------|--------------|-----|--------|--------------|---------------|
| 213006 | 3842 | 79 | 3.83%  | 5.7743<br>81 | 27  | 1.28%  | 1.975<br>734 | Mfsd4         |
| 110446 | 3373 | 79 | 50.10% | 6.5772<br>82 | 90  | 50.61% | 7.501<br>503 | Acat1         |
| 22325  | 3498 | 79 | 59.98% | 6.3422<br>45 | 40  | 40.68% | 3.214<br>862 | Vav2          |
| 26939  | 4234 | 79 | 44.97% | 5.2397<br>67 | 63  | 43.91% | 4.183<br>231 | Polr3e        |
| 53413  | 3344 | 79 | 56.55% | 6.6343<br>22 | 61  | 44.59% | 5.128<br>445 | Exoc7         |
| 67457  | 3166 | 79 | 63.20% | 7.0073<br>19 | 66  | 56.82% | 5.860<br>776 | Frmf8         |
| 68276  | 2008 | 79 | 74.15% | 11.048<br>39 | 70  | 68.03% | 9.800<br>685 | Toe1          |
| 68428  | 3142 | 79 | 55.95% | 7.0608<br>44 | 69  | 54.87% | 6.173<br>977 | Steap3        |
| 11839  | 1199 | 79 | 83.74% | 18.503<br>06 | 470 | 93.74% | 110.2<br>049 | Areg          |
| 237887 | 3516 | 79 | 51.14% | 6.3097<br>76 | 64  | 43.26% | 5.117<br>445 | Slfn10-p<br>s |
| 69769  | 1122 | 79 | 95.99% | 19.772<br>88 | 54  | 86.54% | 13.53<br>079 | Tnfrsf81<br>2 |
| 170460 | 2500 | 79 | 76.68% | 8.8740<br>69 | 69  | 64.12% | 7.759<br>455 | Stard5        |
| 320473 | 6437 | 79 | 37.13% | 3.4465<br>08 | 58  | 30.01% | 2.533<br>183 | Heatr5b       |
| 13350  | 1776 | 79 | 83.16% | 12.491<br>65 | 60  | 68.86% | 9.497<br>962 | Dgat1         |
| 19367  | 2046 | 79 | 75.61% | 10.843<br>19 | 60  | 66.52% | 8.244<br>565 | Rad9          |
| 70099  | 4101 | 78 | 22.51% | 5.3412<br>21 | 73  | 21.95% | 5.004<br>437 | Smc4          |
| 15353  | 1644 | 78 | 82.06% | 13.323<br>81 | 96  | 87.17% | 16.41<br>691 | Hmg20b        |
| 319513 | 3505 | 78 | 54.35% | 6.2494<br>57 | 74  | 49.81% | 5.935<br>616 | Pcd1a         |
| 14229  | 3523 | 78 | 57.03% | 6.2175<br>27 | 143 | 78.85% | 11.41<br>157 | Fkbp5         |
| 215512 | 2334 | 78 | 61.53% | 9.3848<br>96 | 54  | 61.40% | 6.504<br>517 | Fam117a       |
| 14790  | 568  | 78 | 79.40% | 38.563<br>99 | 94  | 79.23% | 46.52<br>663 | Grc10         |
| 104348 | 4096 | 78 | 50.81% | 5.3477<br>41 | 53  | 38.94% | 3.637<br>793 | Zfp120        |

|                                  |      |    |        |              |    |        |              |                   |
|----------------------------------|------|----|--------|--------------|----|--------|--------------|-------------------|
| 68705                            | 1467 | 78 | 86.03% | 14.931<br>39 | 56 | 72.67% | 10.73<br>198 | Gtf2f2            |
| 140546                           | 1574 | 78 | 77.83% | 13.916<br>36 | 65 | 66.71% | 11.60<br>996 | Eri3              |
| 70397                            | 1732 | 78 | 66.92% | 12.646<br>85 | 50 | 62.99% | 8.116<br>041 | Tmem70            |
| 69029                            | 608  | 78 | 93.91% | 36.026<br>89 | 97 | 89.80% | 44.85<br>287 | 1500032<br>L24Rik |
| 67203                            | 2306 | 78 | 77.88% | 9.4988<br>5  | 57 | 67.30% | 6.949<br>246 | Nde1              |
| 66248                            | 1471 | 78 | 83.62% | 14.890<br>79 | 87 | 78.25% | 16.62<br>757 | Alg5              |
| 19671                            | 1446 | 78 | 75.24% | 15.148<br>23 | 65 | 76.56% | 12.63<br>767 | Rce1              |
| 66199                            | 824  | 78 | 90.78% | 26.582<br>95 | 49 | 80.95% | 16.71<br>826 | Comm4             |
| gi 149267152 reflX<br>M_972673.2 | 4997 | 78 | 32.50% | 4.3835       | 20 | 14.07% | 1.125<br>234 | -                 |
| 56292                            | 1056 | 78 | 89.68% | 20.742<br>75 | 78 | 89.11% | 20.76<br>6   | Naa10             |
| 67028                            | 5842 | 78 | 41.73% | 3.7494<br>6  | 53 | 29.08% | 2.550<br>565 | 2610002<br>M06Rik |
| 56791                            | 1402 | 78 | 82.52% | 15.623<br>64 | 61 | 71.47% | 12.23<br>218 | Ube216            |
| 68375                            | 739  | 78 | 90.93% | 29.640<br>52 | 80 | 87.96% | 30.43<br>46  | Ndufa8            |
| 245884                           | 1203 | 78 | 69.99% | 18.208<br>1  | 34 | 58.10% | 7.945<br>759 | Fam71f2           |
| 54138                            | 2425 | 78 | 68.82% | 9.0327<br>2  | 64 | 53.98% | 7.419<br>768 | Atxn10            |
| 64099                            | 2700 | 78 | 72.70% | 8.1127<br>21 | 58 | 55.67% | 6.039<br>296 | Parvg             |
| 277854                           | 8213 | 78 | 30.37% | 2.6670<br>34 | 70 | 30.50% | 2.396<br>174 | Depdc5            |
| 20017                            | 4017 | 78 | 52.55% | 5.4529<br>12 | 46 | 38.26% | 3.219<br>424 | Polr1b            |
| 74154                            | 3414 | 78 | 54.36% | 6.4160<br>36 | 50 | 36.47% | 4.117<br>453 | Unkl              |
| 18221                            | 1363 | 78 | 61.41% | 16.070<br>69 | 62 | 56.71% | 12.78<br>845 | Nudc              |
| 19934                            | 2081 | 78 | 68.67% | 10.525<br>88 | 97 | 75.16% | 13.10<br>454 | Rpl22             |
| 21343                            | 2264 | 78 | 68.55% | 9.6750<br>65 | 69 | 76.90% | 8.568<br>302 | Taf6              |

|                                 |      |    |        |              |     |        |              |                   |
|---------------------------------|------|----|--------|--------------|-----|--------|--------------|-------------------|
| 67727                           | 5777 | 78 | 48.88% | 3.7916<br>47 | 58  | 36.51% | 2.822<br>59  | Stx17             |
| 272359                          | 2741 | 78 | 66.55% | 7.9913<br>71 | 55  | 59.21% | 5.641<br>256 | Irf2bp1           |
| 219144                          | 1505 | 78 | 85.65% | 14.554<br>38 | 109 | 83.72% | 20.36<br>161 | Arl11             |
| 57423                           | 496  | 78 | 82.86% | 44.161<br>99 | 118 | 82.46% | 66.88<br>403 | Atp5j2            |
| 15903                           | 964  | 78 | 77.18% | 22.722<br>35 | 93  | 85.27% | 27.12<br>239 | Id3               |
| 23999                           | 1594 | 78 | 83.25% | 13.741<br>75 | 61  | 76.54% | 10.75<br>88  | Twf2              |
| 23853                           | 2294 | 78 | 77.46% | 9.5485<br>38 | 48  | 59.90% | 5.882<br>608 | Def6              |
| 225467                          | 2736 | 78 | 60.23% | 8.0059<br>75 | 55  | 47.37% | 5.651<br>565 | Pggt1b            |
| 71653                           | 4081 | 78 | 47.39% | 5.3673<br>97 | 84  | 49.72% | 5.786<br>751 | 4930506<br>M07Rik |
| 108670                          | 1869 | 78 | 71.96% | 11.719<br>82 | 87  | 72.93% | 13.08<br>676 | Epsti1            |
| 58240                           | 2958 | 78 | 63.22% | 7.4051<br>21 | 55  | 52.94% | 5.227<br>411 | Hs1bp3            |
| 103742                          | 762  | 78 | 84.91% | 28.745<br>86 | 79  | 90.29% | 29.14<br>703 | Mien1             |
| 170786                          | 1484 | 78 | 78.84% | 14.760<br>34 | 115 | 87.67% | 21.78<br>643 | Cd209a            |
| 238692                          | 3252 | 77 | 56.86% | 6.6493       | 58  | 45.91% | 5.014<br>176 | Zfp874a           |
| 17714                           | 4065 | 77 | 50.97% | 5.3194<br>4  | 68  | 51.09% | 4.702<br>951 | Grpel2            |
| 71675                           | 4140 | 77 | 48.82% | 5.2230<br>73 | 52  | 46.06% | 3.531<br>223 | 0610010<br>F05Rik |
| 330544                          | 3708 | 77 | 48.30% | 5.8315<br>86 | 50  | 33.04% | 3.790<br>988 | C230091<br>D08Rik |
| 237073                          | 5621 | 77 | 36.83% | 3.8469<br>17 | 46  | 26.97% | 2.300<br>734 | Rbm41             |
| gi 21703721 ref N<br>M_145358.1 | 2661 | 77 | 64.98% | 8.1260<br>89 | 79  | 72.53% | 8.346<br>499 | -                 |
| 73174                           | 3358 | 77 | 55.36% | 6.4394<br>05 | 57  | 55.78% | 4.772<br>174 | Tbkbp1            |
| 239647                          | 2216 | 77 | 68.64% | 9.7579<br>07 | 47  | 61.55% | 5.962<br>8   | Pced1b            |
| 272027                          | 3726 | 77 | 47.53% | 5.8034<br>14 | 52  | 38%    | 3.923<br>581 | Tstd2             |

|                                     |       |    |        |              |    |        |              |              |
|-------------------------------------|-------|----|--------|--------------|----|--------|--------------|--------------|
| 74237                               | 3085  | 77 | 68.23% | 7.0092<br>45 | 48 | 51.57% | 4.374<br>296 | Tubgcp2      |
| 331004                              | 3492  | 77 | 63.80% | 6.1923<br>03 | 56 | 47.42% | 4.508<br>54  | Slc9a9       |
| 19090                               | 12674 | 77 | 23.17% | 1.7061<br>32 | 40 | 13.25% | 0.887<br>296 | Prkdc        |
| gi 162417962 ref N<br>M_001111316.1 | 5664  | 77 | 8.72%  | 3.8177<br>12 | 25 | 7.79%  | 1.240<br>906 | -            |
| gi 21450264 ref N<br>M_144893.1     | 1889  | 77 | 74.91% | 11.447<br>07 | 46 | 61.46% | 6.846<br>175 | -            |
| 59046                               | 4032  | 77 | 45.96% | 5.3629<br>77 | 88 | 48.41% | 6.135<br>985 | Arpp19       |
| 231151                              | 3791  | 77 | 53.65% | 5.7039<br>1  | 44 | 36.27% | 3.263<br>03  | Tada2b       |
| 26374                               | 5056  | 77 | 35.42% | 4.2768<br>04 | 72 | 30.10% | 4.003<br>571 | Rfwd2        |
| 70601                               | 3125  | 77 | 58.37% | 6.9195<br>27 | 65 | 58.94% | 5.847<br>705 | Ecd          |
| 19377                               | 7348  | 77 | 36.32% | 2.9427<br>77 | 48 | 24.96% | 1.836<br>514 | Rai1         |
| 269198                              | 12108 | 77 | 24.70% | 1.7858<br>87 | 45 | 16.01% | 1.044<br>87  | Nbeal1       |
| 235606                              | 2407  | 77 | 69.05% | 8.9835<br>99 | 75 | 63.07% | 8.760<br>064 | Apeh         |
| 231807                              | 2557  | 77 | 64.96% | 8.4565<br>98 | 75 | 61.05% | 8.246<br>177 | BC0370<br>34 |
| 22428                               | 964   | 77 | 85.17% | 22.431<br>04 | 53 | 75.83% | 15.45<br>685 | Dctn6        |
| 110078                              | 3860  | 77 | 56.37% | 5.6019<br>49 | 49 | 43.11% | 3.568<br>871 | Pygb         |
| 16416                               | 5795  | 77 | 40.81% | 3.7314<br>1  | 50 | 27.39% | 2.425<br>709 | Itgb3        |
| gi 60097936 ref N<br>M_026322.3     | 1890  | 77 | 56.61% | 11.441<br>02 | 87 | 61.06% | 12.94<br>135 | -            |
| 216445                              | 1811  | 77 | 75.76% | 11.940<br>1  | 55 | 59.97% | 8.538<br>201 | Arhgap9      |
| 72144                               | 4065  | 77 | 57.69% | 5.3194<br>4  | 43 | 40.54% | 2.973<br>925 | Slc37a3      |
| 21854                               | 917   | 77 | 89.09% | 23.580<br>72 | 67 | 82.77% | 20.54<br>128 | Timm17<br>a  |
| 23988                               | 3808  | 77 | 41.02% | 5.6784<br>46 | 78 | 40.99% | 5.758<br>638 | Pin1         |
| 71673                               | 1953  | 77 | 66.82% | 11.071<br>95 | 78 | 71.58% | 11.22<br>831 | Rnf215       |

|                              |      |    |        |              |     |        |              |              |
|------------------------------|------|----|--------|--------------|-----|--------|--------------|--------------|
| 56620                        | 1245 | 77 | 86.51% | 17.368<br>29 | 64  | 86.43% | 14.45<br>216 | Clec4n       |
| 232164                       | 3330 | 77 | 63.39% | 6.4935<br>5  | 64  | 57.30% | 5.403<br>285 | Paip2b       |
| 16558                        | 5446 | 76 | 45.02% | 3.9189<br>68 | 72  | 44.29% | 3.716<br>867 | Kif16b       |
| 232236                       | 1757 | 76 | 78.32% | 12.147<br>24 | 74  | 77.92% | 11.84<br>083 | Ccdc174      |
| 20351                        | 3224 | 76 | 70.87% | 6.6199<br>43 | 50  | 47.24% | 4.360<br>106 | Sema4a       |
| 51885                        | 2563 | 76 | 56.46% | 8.3272<br>33 | 46  | 48.34% | 5.045<br>815 | Tubgcp4      |
| 73442                        | 5733 | 76 | 47.34% | 3.7227<br>8  | 67  | 37.73% | 3.285<br>602 | Hspa12a      |
| 226541                       | 4037 | 76 | 53.46% | 5.2867<br>72 | 32  | 31.38% | 2.228<br>504 | Klhl20       |
| 66612                        | 2023 | 76 | 72.17% | 10.550<br>02 | 73  | 68.07% | 10.14<br>493 | Ormdl3       |
| 56196                        | 1977 | 76 | 70.86% | 10.795<br>5  | 55  | 70.01% | 7.821<br>285 | Tdp2         |
| 208146                       | 6143 | 76 | 43.74% | 3.4743<br>12 | 43  | 26.68% | 1.967<br>932 | Yeats2       |
| 108934                       | 4499 | 76 | 47.32% | 4.7438<br>76 | 51  | 37.41% | 3.186<br>958 | BC0246<br>59 |
| 67050                        | 4262 | 76 | 50.05% | 5.0076<br>72 | 35  | 30.46% | 2.308<br>749 | Nkap         |
| 67554                        | 1706 | 76 | 74.50% | 12.510<br>37 | 63  | 77.61% | 10.38<br>206 | Slc25a30     |
| 69085                        | 1544 | 76 | 84.07% | 13.822<br>99 | 67  | 80.57% | 12.19<br>971 | Zcchc9       |
| 12593                        | 3494 | 76 | 60.07% | 6.1083<br>85 | 60  | 48.80% | 4.827<br>813 | Cdyl         |
| 66860                        | 7873 | 76 | 32.19% | 2.7108<br>72 | 69  | 31%    | 2.463<br>945 | Tanc1        |
| 107435                       | 1576 | 76 | 83.95% | 13.542<br>32 | 64  | 80.52% | 11.41<br>684 | Hat1         |
| 24018                        | 4153 | 76 | 44.52% | 5.1391<br>04 | 52  | 38.94% | 3.520<br>169 | Rngtt        |
| 52712                        | 2353 | 76 | 70.17% | 9.0704<br>2  | 76  | 64.22% | 9.080<br>584 | Zkscan6      |
| gi 113930756 ref NM_009113.3 | 682  | 76 | 71.55% | 31.294<br>28 | 103 | 69.65% | 42.45<br>951 | -            |
| 21766                        | 1454 | 76 | 81.84% | 14.678<br>61 | 63  | 82.12% | 12.18<br>143 | Tex261       |



|          |      |    |        |              |     |        |              |         |
|----------|------|----|--------|--------------|-----|--------|--------------|---------|
| 22033    | 2222 | 76 | 74.48% | 9.6051<br>74 | 105 | 81.37% | 13.28<br>518 | Traf5   |
| 13480    | 2293 | 76 | 44.27% | 9.3077<br>62 | 75  | 42.35% | 9.195<br>584 | Dpm1    |
| 353190   | 3343 | 76 | 66.83% | 6.3842<br>95 | 61  | 54.26% | 5.129<br>979 | Edc3    |
| 28019    | 1617 | 76 | 83.98% | 13.198<br>95 | 49  | 79.90% | 8.519<br>384 | Ing4    |
| 74202    | 3109 | 76 | 58.54% | 6.8648<br>11 | 94  | 62.98% | 8.500<br>202 | Fblim1  |
| 67444    | 1368 | 76 | 78.22% | 15.601<br>39 | 73  | 80.41% | 15.00<br>234 | Ilkap   |
| 268882   | 4110 | 76 | 56.18% | 5.1928<br>7  | 45  | 40.95% | 3.078<br>171 | Fbxo45  |
| 12802    | 3865 | 75 | 55.14% | 5.4493<br>85 | 28  | 23.93% | 2.036<br>717 | Cnr2    |
| 67264    | 641  | 75 | 99.53% | 32.857<br>83 | 95  | 88.92% | 41.66<br>656 | Ndufb8  |
| 1.01E+08 | 1191 | 75 | 64.74% | 17.684<br>19 | 20  | 30.98% | 4.721<br>069 | Tpsab1  |
| 14227    | 661  | 75 | 85.02% | 31.863<br>65 | 109 | 86.69% | 46.36<br>04  | Fkbp2   |
| 235504   | 3201 | 75 | 63.17% | 6.5797<br>79 | 65  | 53.89% | 5.708<br>865 | Slc17a5 |
| 59016    | 1848 | 75 | 77.11% | 11.397<br>12 | 49  | 60.55% | 7.454<br>461 | Thap11  |
| 12050    | 3476 | 75 | 54.55% | 6.0592<br>27 | 42  | 45.94% | 3.396<br>969 | Bcl2l2  |
| 77733    | 4049 | 75 | 55.82% | 5.2017<br>47 | 44  | 35.02% | 3.055<br>111 | Rnf170  |
| 71807    | 3322 | 75 | 35.46% | 6.3401<br>18 | 38  | 21.52% | 3.215<br>926 | Tars2   |
| 241230   | 3166 | 75 | 60.11% | 6.6525<br>18 | 84  | 64.28% | 7.459<br>17  | St8sia6 |
| 99470    | 6672 | 75 | 38.11% | 3.1567<br>55 | 76  | 34.05% | 3.202<br>43  | Magi3   |
| 66902    | 2558 | 75 | 64.39% | 8.2337<br>26 | 60  | 57.62% | 6.594<br>363 | Mtap    |
| 97961    | 1993 | 75 | 59.66% | 10.567<br>92 | 71  | 48.42% | 10.01<br>551 | Nol12   |
| 69274    | 4627 | 75 | 49.71% | 4.5519<br>5  | 100 | 54.57% | 6.076<br>068 | Ctdspl  |
| 320615   | 9124 | 75 | 24.90% | 2.3084<br>03 | 51  | 17.34% | 1.571<br>473 | Dopey1  |

|                                 |      |    |        |              |     |        |              |         |
|---------------------------------|------|----|--------|--------------|-----|--------|--------------|---------|
| 69639                           | 1282 | 75 | 65.44% | 16.428<br>92 | 52  | 61.47% | 11.40<br>348 | Exosc8  |
| 21428                           | 1992 | 75 | 75.90% | 10.573<br>23 | 79  | 75.10% | 11.14<br>962 | Mlx     |
| 226823                          | 3703 | 75 | 52.47% | 5.6877<br>86 | 52  | 48.04% | 3.947<br>951 | Kctd3   |
| 68755                           | 1202 | 75 | 73.29% | 17.522<br>36 | 94  | 80.12% | 21.98<br>596 | Cgrrf1  |
| 19656                           | 1750 | 75 | 45.71% | 12.035<br>36 | 82  | 60.11% | 13.17<br>34  | Rbmx11  |
| 235542                          | 6938 | 75 | 36.13% | 3.0357<br>27 | 59  | 31.16% | 2.390<br>781 | Ppp2r3a |
| gi 142352689 ref NM_153082.3    | 4695 | 75 | 48.54% | 4.4860<br>22 | 43  | 33.01% | 2.574<br>868 | -       |
| gi 118130155 ref NM_010796.2    | 1345 | 75 | 77.70% | 15.659<br>38 | 70  | 79.11% | 14.63<br>18  | -       |
| 382406                          | 2727 | 75 | 71.87% | 7.7234<br>59 | 47  | 53.91% | 4.845<br>458 | Poc1b   |
| 14894                           | 1318 | 75 | 74.36% | 15.980<br>18 | 44  | 68.89% | 9.385<br>543 | Gtl3    |
| 74153                           | 3162 | 75 | 67.43% | 6.6609<br>34 | 54  | 51.45% | 4.801<br>247 | Uba7    |
| 18108                           | 1877 | 75 | 76.88% | 11.221<br>03 | 63  | 77.20% | 9.436<br>227 | Nmt2    |
| 66352                           | 4014 | 74 | 44.15% | 5.1771<br>42 | 52  | 36.40% | 3.642<br>068 | Blzf1   |
| gi 146198680 ref NM_201230.4    | 3074 | 74 | 58.56% | 6.7602<br>63 | 66  | 56.99% | 6.036<br>18  | -       |
| 219189                          | 6928 | 74 | 37.92% | 2.9995<br>74 | 93  | 38.45% | 3.773<br>959 | Vwa8    |
| 66156                           | 3384 | 74 | 31.35% | 6.1409<br>71 | 58  | 27.25% | 4.818<br>588 | Anapc11 |
| 18479                           | 3081 | 74 | 62.09% | 6.7449<br>03 | 101 | 67.19% | 9.216<br>198 | Pak1    |
| 22379                           | 4428 | 74 | 53.46% | 4.6931       | 55  | 36.59% | 3.492<br>024 | Fmnl3   |
| 234138                          | 5059 | 74 | 35.50% | 4.1077<br>38 | 41  | 30.05% | 2.278<br>459 | Tti2    |
| 170749                          | 5710 | 74 | 42.91% | 3.6394<br>13 | 30  | 23.06% | 1.477<br>091 | Mtmr4   |
| gi 149260498 ref XM_001477587.1 | 5391 | 74 | 35.45% | 3.8547<br>67 | 52  | 28.79% | 2.711<br>79  | -       |
| 72084                           | 1019 | 74 | 78.51% | 20.393<br>57 | 81  | 78.21% | 22.34<br>771 | Pigx    |

|                                  |      |    |        |              |    |        |              |             |
|----------------------------------|------|----|--------|--------------|----|--------|--------------|-------------|
| 72795                            | 3419 | 74 | 58.41% | 6.0781<br>07 | 59 | 48.90% | 4.851<br>489 | Ttc19       |
| 230770                           | 1845 | 74 | 75.61% | 11.263<br>44 | 74 | 69.97% | 11.27<br>606 | Tmem39<br>b |
| 108159                           | 2817 | 74 | 55.56% | 7.3770<br>14 | 76 | 50.76% | 7.584<br>883 | Ubxn8       |
| 72195                            | 2692 | 74 | 65.97% | 7.7195<br>57 | 55 | 44.76% | 5.743<br>938 | Supt71      |
| 215051                           | 2208 | 74 | 74.37% | 9.4117<br>06 | 55 | 64.36% | 7.003<br>026 | Bud13       |
| gi 226958394 ref N<br>M_011614.2 | 1515 | 74 | 39.14% | 13.716<br>86 | 90 | 41.32% | 16.70<br>137 | -           |
| 328232                           | 6654 | 74 | 35.27% | 3.1230<br>91 | 86 | 39.78% | 3.633<br>605 | Gfod1       |
| 66641                            | 2798 | 74 | 67.37% | 7.4271<br>08 | 43 | 48.71% | 4.320<br>588 | Sike1       |
| 67608                            | 4426 | 74 | 47.67% | 4.6952<br>21 | 19 | 19.68% | 1.206<br>881 | Narf        |
| 212114                           | 1560 | 74 | 78.14% | 13.321<br>18 | 41 | 61.28% | 7.388<br>927 | Nhlrc3      |
| 14461                            | 3258 | 74 | 58.75% | 6.3784<br>68 | 21 | 28.48% | 1.812<br>134 | Gata2       |
| 208647                           | 3318 | 74 | 54.37% | 6.2631<br>25 | 50 | 39.21% | 4.236<br>583 | Creb3l2     |
| 384009                           | 2019 | 74 | 71.77% | 10.292<br>74 | 39 | 55.97% | 5.430<br>632 | Glipr2      |
| 1.01E+08                         | 3466 | 74 | 58.80% | 5.9956<br>86 | 48 | 45.76% | 3.893<br>452 | Atg14       |
| 14756                            | 4659 | 74 | 34.26% | 4.4604<br>09 | 30 | 18.29% | 1.810<br>3   | Gpld1       |
| 70239                            | 2787 | 74 | 66.88% | 7.4564<br>22 | 47 | 41.94% | 4.741<br>142 | Gtf3c5      |
| 67201                            | 2523 | 74 | 66.90% | 8.2366<br>42 | 69 | 65.99% | 7.688<br>718 | Glod4       |
| 20592                            | 5471 | 74 | 44.27% | 3.7984       | 58 | 34.22% | 2.980<br>461 | Kdm5d       |
| 64214                            | 1859 | 74 | 68.80% | 11.178<br>62 | 60 | 70.58% | 9.073<br>9   | Rgs18       |
| 330814                           | 8202 | 74 | 28.72% | 2.5336<br>56 | 41 | 18.69% | 1.405<br>356 | Lphn1       |
| 270669                           | 4799 | 74 | 39.76% | 4.3302<br>87 | 57 | 32.38% | 3.339<br>229 | Mbtps2      |
| 66618                            | 836  | 74 | 90.55% | 24.857<br>71 | 77 | 89.83% | 25.89<br>444 | Snrnp27     |

|                                 |      |    |        |              |     |        |              |          |
|---------------------------------|------|----|--------|--------------|-----|--------|--------------|----------|
| 108099                          | 3340 | 74 | 59.19% | 6.2218<br>7  | 99  | 65.72% | 8.333<br>182 | Prkag2   |
| 246728                          | 3873 | 74 | 50.99% | 5.3656<br>2  | 87  | 59.39% | 6.315<br>298 | Oas2     |
| 80891                           | 1991 | 74 | 77.70% | 10.437<br>49 | 58  | 78.85% | 8.189<br>905 | FcrIs    |
| 57279                           | 1783 | 74 | 78.13% | 11.655<br>1  | 65  | 65.40% | 10.24<br>906 | Slc25a20 |
| 78558                           | 2740 | 74 | 52.37% | 7.5843<br>24 | 109 | 62.92% | 11.18<br>402 | Htra3    |
| 66212                           | 552  | 74 | 63.95% | 37.646<br>82 | 77  | 64.31% | 39.21<br>695 | Sec61b   |
| 17089                           | 1568 | 74 | 66.90% | 13.253<br>22 | 82  | 83.23% | 14.70<br>246 | Lyar     |
| 50780                           | 4704 | 74 | 6.89%  | 4.4177<br>4  | 48  | 2.08%  | 2.868<br>772 | Rgs3     |
| 101568                          | 1790 | 74 | 74.58% | 11.609<br>52 | 57  | 68.77% | 8.952<br>492 | Vrk3     |
| 85305                           | 2173 | 73 | 45.05% | 9.4340<br>65 | 87  | 46.39% | 11.25<br>594 | Kars     |
| 240756                          | 3196 | 73 | 60.54% | 6.4143<br>37 | 75  | 57.54% | 6.597<br>458 | Klhl12   |
| 21425                           | 2357 | 73 | 66.23% | 8.6975<br>91 | 50  | 61.22% | 5.963<br>93  | Tfeb     |
| 21872                           | 7054 | 73 | 38.52% | 2.9061<br>84 | 68  | 35.71% | 2.710<br>164 | Tjp1     |
| 79043                           | 1953 | 73 | 68.10% | 10.496<br>79 | 52  | 57.96% | 7.485<br>541 | Spsb3    |
| 237500                          | 5990 | 73 | 36.84% | 3.4224<br>08 | 59  | 29.42% | 2.769<br>155 | Tmtc3    |
| 433926                          | 2841 | 73 | 66.21% | 7.2158<br>47 | 35  | 44.35% | 3.463<br>53  | Lrrc8b   |
| 18408                           | 3469 | 73 | 59.44% | 5.9095<br>48 | 59  | 49.29% | 4.781<br>562 | Slc25a15 |
| gi 153792499 ref NM_001081128.2 | 4092 | 73 | 55.50% | 5.0098<br>29 | 63  | 48.88% | 4.328<br>397 | -        |
| 229534                          | 4481 | 73 | 15.53% | 4.5749<br>21 | 55  | 12.61% | 3.450<br>721 | Pbxip1   |
| 211064                          | 1968 | 73 | 71.09% | 10.416<br>78 | 67  | 67.33% | 9.571<br>32  | Alkbh1   |
| 23972                           | 3635 | 73 | 52.32% | 5.6396<br>76 | 41  | 36.75% | 3.171<br>039 | Papss2   |
| 18755                           | 3301 | 73 | 66.46% | 6.2103<br>07 | 49  | 43.84% | 4.173<br>233 | Prkch    |

|                                  |      |    |        |              |    |        |              |         |
|----------------------------------|------|----|--------|--------------|----|--------|--------------|---------|
| gi 141801912 ref N<br>M_030560.3 | 3279 | 73 | 53.25% | 6.2519<br>74 | 51 | 42.85% | 4.372<br>712 | -       |
| 20587                            | 1674 | 73 | 83.09% | 12.246<br>25 | 69 | 74.67% | 11.58<br>819 | Smarcb1 |
| 72615                            | 2483 | 73 | 71.85% | 8.2562<br>31 | 64 | 63.15% | 7.246<br>451 | Anks3   |
| 231889                           | 735  | 73 | 53.47% | 27.891<br>46 | 74 | 56.33% | 28.30<br>522 | Bud31   |
| 1E+08                            | 1789 | 73 | 52.32% | 11.459<br>04 | 62 | 46.95% | 9.743<br>241 | Gm4720  |
| 52713                            | 1078 | 73 | 93.60% | 19.016<br>9  | 75 | 94.34% | 19.55<br>981 | Ccdc59  |
| gi 118130126 ref N<br>M_011546.2 | 5218 | 73 | 46.72% | 3.9287<br>51 | 41 | 28.33% | 2.209<br>031 | -       |
| 21841                            | 4477 | 73 | 44.65% | 4.5790<br>09 | 49 | 36.43% | 3.077<br>026 | Tia1    |
| 56505                            | 1670 | 73 | 70.60% | 12.275<br>58 | 62 | 78.62% | 10.43<br>752 | Ruvb11  |
| 66736                            | 1245 | 73 | 86.10% | 16.466<br>04 | 76 | 87.07% | 17.16<br>194 | Emc2    |
| 20437                            | 2121 | 73 | 72.94% | 9.6653<br>57 | 67 | 68.74% | 8.880<br>885 | Siah1a  |
| 320713                           | 7420 | 73 | 23.33% | 2.7628<br>33 | 41 | 18.42% | 1.553<br>467 | Mysm1   |
| 57315                            | 2235 | 73 | 77.72% | 9.1723<br>59 | 73 | 75.21% | 9.182<br>638 | Wdr46   |
| 14293                            | 1332 | 73 | 92.27% | 15.390<br>56 | 92 | 91.67% | 19.41<br>805 | Fpr1    |
| 237422                           | 3114 | 73 | 62.49% | 6.5832<br>44 | 65 | 49.65% | 5.868<br>362 | Ric8b   |
| 57743                            | 2369 | 73 | 66.15% | 8.6535<br>34 | 56 | 53.31% | 6.645<br>767 | Sec61a2 |
| 94062                            | 1531 | 73 | 79.75% | 13.390<br>09 | 84 | 79.95% | 15.42<br>504 | Mrpl3   |
| 54608                            | 2903 | 73 | 56.70% | 7.0617<br>37 | 39 | 41.37% | 3.776<br>937 | Abhd2   |
| 26388                            | 1796 | 73 | 61.80% | 11.414<br>38 | 76 | 56.96% | 11.89<br>678 | Ifi202b |
| 330788                           | 5780 | 73 | 43.62% | 3.5467<br>51 | 38 | 25.48% | 1.848<br>323 | Zfp866  |
| 12039                            | 1773 | 73 | 83.19% | 11.562<br>45 | 92 | 89.11% | 14.58<br>818 | Bckdha  |
| 72440                            | 1898 | 73 | 61.38% | 10.800<br>96 | 63 | 59.64% | 9.331<br>822 | Rhno1   |

|        |      |    |        |              |     |        |              |                |
|--------|------|----|--------|--------------|-----|--------|--------------|----------------|
| 66136  | 686  | 72 | 83.53% | 29.474<br>34 | 58  | 86.01% | 23.76<br>983 | Znrd1          |
| 80288  | 5341 | 72 | 46.23% | 3.7856<br>95 | 26  | 18.48% | 1.368<br>589 | Bcl9l          |
| 66659  | 1756 | 72 | 75.74% | 11.514<br>46 | 45  | 55.24% | 7.204<br>604 | Acp6           |
| 11532  | 1533 | 72 | 61.45% | 13.189<br>43 | 86  | 67.84% | 15.77<br>17  | Adh5           |
| 59007  | 2901 | 72 | 58.43% | 6.9698<br>03 | 70  | 60.05% | 6.783<br>791 | Ngly1          |
| 11480  | 5681 | 72 | 42.05% | 3.5591<br>26 | 59  | 30.91% | 2.919<br>775 | Acvr2a         |
| 12769  | 4392 | 72 | 47.02% | 4.6036<br>88 | 74  | 43.67% | 4.736<br>87  | Ccr9           |
| 15109  | 2758 | 72 | 69.14% | 7.3311<br>81 | 110 | 77.16% | 11.21<br>297 | Hal            |
| 239273 | 5729 | 72 | 39.99% | 3.5293<br>07 | 45  | 29.50% | 2.208<br>288 | Abcc4          |
| 78330  | 1594 | 72 | 70.95% | 12.684<br>69 | 96  | 64.18% | 16.93<br>187 | Ndufv3         |
| 232187 | 2507 | 72 | 70.68% | 8.0651<br>76 | 48  | 63.54% | 5.382<br>81  | Smyd5          |
| 214952 | 2825 | 72 | 59.26% | 7.1573<br>09 | 47  | 46.55% | 4.677<br>368 | Rhot2          |
| 28106  | 913  | 72 | 93.76% | 22.146<br>11 | 102 | 95.40% | 31.40<br>881 | D17Wsu<br>104e |
| 71240  | 3535 | 72 | 55.62% | 5.7197<br>73 | 43  | 43.68% | 3.419<br>804 | Osbpl7         |
| 71799  | 3219 | 72 | 64.37% | 6.2812<br>67 | 70  | 52.53% | 6.113<br>63  | Ptcd1          |
| 66682  | 2072 | 72 | 76.06% | 9.7583<br>96 | 72  | 70.22% | 9.769<br>332 | Trappc5        |
| 66368  | 1576 | 72 | 70.24% | 12.829<br>57 | 42  | 63.71% | 7.492<br>301 | Rtcd1          |
| 19725  | 3353 | 72 | 52.85% | 6.0302<br>41 | 22  | 22.04% | 1.844<br>638 | Rfx2           |
| 109801 | 1958 | 72 | 72.11% | 10.326<br>56 | 40  | 56.18% | 5.743<br>405 | Glo1           |
| 103266 | 3778 | 72 | 54.05% | 5.3518<br>79 | 60  | 45.71% | 4.464<br>897 | AI59746<br>8   |
| 227682 | 2576 | 72 | 63.66% | 7.8491<br>45 | 37  | 48.56% | 4.038<br>108 | Trub2          |
| 66394  | 2134 | 72 | 65.70% | 9.4748<br>82 | 64  | 68.70% | 8.431<br>555 | Nosip          |

|        |      |    |        |              |     |        |              |             |
|--------|------|----|--------|--------------|-----|--------|--------------|-------------|
| 67225  | 3888 | 72 | 44.93% | 5.2004<br>62 | 74  | 44.86% | 5.350<br>909 | Rnpc3       |
| 72699  | 1987 | 72 | 80.62% | 10.175<br>84 | 42  | 50.18% | 5.942<br>56  | Lime1       |
| 66121  | 619  | 72 | 78.03% | 32.664<br>62 | 53  | 77.54% | 24.07<br>173 | Chchd1      |
| 76850  | 6527 | 72 | 38.27% | 3.0978<br>09 | 36  | 22.26% | 1.550<br>64  | Eif2c4      |
| 77519  | 6305 | 72 | 40.10% | 3.2068<br>83 | 24  | 16.35% | 1.070<br>159 | Zfp266      |
| 54197  | 1101 | 72 | 85.65% | 18.364<br>58 | 57  | 75.75% | 14.55<br>491 | Rnf5        |
| 72948  | 5108 | 72 | 40.90% | 3.9583<br>78 | 13  | 10.88% | 0.715<br>508 | Tppp        |
| 67466  | 2859 | 72 | 62.89% | 7.0721<br>92 | 87  | 71.74% | 8.555<br>142 | Pdcl        |
| 68742  | 962  | 72 | 85.86% | 21.018<br>08 | 95  | 92.31% | 27.76<br>327 | Tmem21<br>9 |
| 19087  | 4041 | 72 | 53.35% | 5.0035<br>63 | 72  | 47.64% | 5.009<br>17  | Prkar2a     |
| 15129  | 626  | 72 | 80.83% | 32.299<br>36 | 100 | 69.17% | 44.91<br>049 | Hbb-b1      |
| 332579 | 1611 | 72 | 81.19% | 12.550<br>84 | 49  | 70.58% | 8.551<br>113 | Card9       |
| 13537  | 1630 | 72 | 69.82% | 12.404<br>54 | 116 | 81.04% | 20.00<br>749 | Dusp2       |
| 22608  | 2191 | 72 | 24.42% | 9.2283<br>88 | 46  | 24.69% | 5.902<br>521 | Ybx1        |
| 14289  | 1296 | 72 | 84.88% | 15.601<br>39 | 83  | 80.40% | 18.00<br>509 | Fpr2        |
| 72181  | 3526 | 72 | 50.68% | 5.7343<br>72 | 44  | 42.99% | 3.508<br>266 | Nsun4       |
| 56404  | 7172 | 72 | 36.07% | 2.8192<br>13 | 48  | 25.64% | 1.881<br>582 | Trip4       |
| 23991  | 837  | 72 | 86.98% | 24.156<br>99 | 78  | 94.03% | 26.19<br>939 | Cib1        |
| 14450  | 3329 | 72 | 63.83% | 6.0737<br>15 | 46  | 48.48% | 3.884<br>778 | Gart        |
| 13448  | 1821 | 72 | 70.40% | 11.103<br>46 | 39  | 57.61% | 6.021<br>113 | Dok1        |
| 53414  | 3854 | 72 | 48.34% | 5.2463<br>41 | 71  | 49.20% | 5.179<br>272 | Bysl        |
| 232987 | 1058 | 71 | 73.44% | 18.845<br>53 | 72  | 74.86% | 19.13<br>238 | B9d2        |

|                              |      |    |        |              |     |        |              |                   |
|------------------------------|------|----|--------|--------------|-----|--------|--------------|-------------------|
| 19088                        | 3358 | 71 | 60.07% | 5.9376<br>33 | 40  | 37.97% | 3.348<br>894 | Prkar2b           |
| 20022                        | 586  | 71 | 92.83% | 34.024<br>87 | 78  | 96.42% | 37.42<br>132 | Polr2j            |
| gi 118130788 ref NM_016850.2 | 1830 | 71 | 86.23% | 10.895<br>39 | 100 | 90.49% | 15.36<br>282 | -                 |
| 20723                        | 3397 | 71 | 57.02% | 5.8694<br>65 | 60  | 50.19% | 4.965<br>67  | Serpib9           |
| 16922                        | 1474 | 71 | 84.67% | 13.526<br>85 | 73  | 83.38% | 13.92<br>347 | Phyh              |
| 66307                        | 2563 | 71 | 68.83% | 7.7793<br>88 | 68  | 60.79% | 7.459<br>031 | Isoc1             |
| 381694                       | 4543 | 71 | 50.28% | 4.3888<br>56 | 48  | 41.01% | 2.970<br>439 | B3gatl            |
| 66315                        | 4883 | 71 | 45.61% | 4.0832<br>63 | 30  | 20.70% | 1.727<br>256 | Senp7             |
| 66246                        | 1608 | 71 | 56.22% | 12.399<br>61 | 55  | 56.53% | 9.616<br>095 | Osgep             |
| 16994                        | 1122 | 71 | 67.11% | 17.770<br>56 | 30  | 70.14% | 7.517<br>103 | Ltb               |
| 108014                       | 1162 | 71 | 74.18% | 17.158<br>84 | 77  | 76.16% | 18.62<br>974 | Srsf9             |
| 67199                        | 1077 | 71 | 68.34% | 18.513<br>07 | 56  | 59.80% | 14.61<br>822 | Pfdn1             |
| 382056                       | 5674 | 71 | 41.89% | 3.5140<br>24 | 61  | 35.81% | 3.022<br>474 | Crtc1             |
| 64945                        | 3794 | 71 | 56.72% | 5.2552<br>91 | 62  | 46.20% | 4.594<br>27  | Cldn12            |
| 232853                       | 2042 | 71 | 72.97% | 9.7642<br>37 | 79  | 75.81% | 10.87<br>661 | Zfp954            |
| 26442                        | 1217 | 71 | 47.33% | 16.383<br>38 | 100 | 48.56% | 23.10<br>104 | Psma5             |
| 71881                        | 2190 | 71 | 74.93% | 9.1043<br>71 | 93  | 73.01% | 11.93<br>881 | Apmap             |
| 12778                        | 2579 | 71 | 59.79% | 7.7311<br>25 | 107 | 65.14% | 11.66<br>419 | Cxcr7             |
| 67255                        | 3165 | 71 | 47.90% | 6.2997<br>07 | 81  | 43.89% | 7.195<br>043 | Zfp422            |
| 67332                        | 604  | 71 | 80.79% | 33.010<br>88 | 92  | 88.41% | 42.82<br>26  | Snrpd3            |
| 20872                        | 2885 | 71 | 55.49% | 6.9111<br>17 | 63  | 53.34% | 6.139<br>272 | Stk16             |
| 66374                        | 1659 | 71 | 84.63% | 12.018<br>43 | 59  | 76.49% | 9.998<br>336 | 2310011<br>J03Rik |



|        |      |    |        |              |    |        |              |                   |
|--------|------|----|--------|--------------|----|--------|--------------|-------------------|
| 107701 | 1697 | 71 | 33.24% | 11.749<br>31 | 58 | 42.19% | 9.608<br>78  | Sf3b4             |
| 80286  | 1527 | 71 | 79.70% | 13.057<br>35 | 60 | 74.33% | 11.04<br>675 | Tusc3             |
| 319601 | 2174 | 71 | 64.03% | 9.1713<br>76 | 50 | 53.50% | 6.465<br>954 | Zfp653            |
| 53611  | 3405 | 71 | 59.77% | 5.8556<br>75 | 55 | 48.75% | 4.541<br>169 | Vti1a             |
| 192192 | 2347 | 71 | 65.79% | 8.4953<br>44 | 49 | 59.10% | 5.869<br>554 | Shkbp1            |
| 79362  | 1421 | 71 | 86.07% | 14.031<br>37 | 40 | 59.89% | 7.913<br>854 | Bhlhe41           |
| 66489  | 452  | 70 | 25.66% | 43.490<br>59 | 73 | 16.15% | 45.40<br>53  | Rpl35             |
| 71361  | 3152 | 70 | 55.77% | 6.2365<br>95 | 70 | 60.85% | 6.243<br>584 | Aifm2             |
| 56361  | 1868 | 70 | 77.89% | 10.523<br>42 | 59 | 64.56% | 8.879<br>679 | Pus1              |
| 56280  | 1496 | 70 | 86.50% | 13.140<br>21 | 67 | 74.60% | 12.59<br>115 | Mrpl37            |
| 67493  | 2718 | 70 | 60.52% | 7.2324<br>31 | 62 | 62.91% | 6.413<br>046 | Mettl16           |
| 67923  | 968  | 70 | 60.74% | 20.307<br>59 | 73 | 62.19% | 21.20<br>165 | Tceb1             |
| 229599 | 1395 | 70 | 79.86% | 14.091<br>58 | 59 | 76.06% | 11.89<br>049 | Gm129             |
| 102182 | 2781 | 70 | 56.92% | 7.0685<br>89 | 71 | 60.63% | 7.177<br>604 | Prmt10            |
| 76251  | 5589 | 70 | 41.30% | 3.5172<br>21 | 57 | 31.62% | 2.867<br>232 | 0610007<br>P08Rik |
| 67369  | 2100 | 70 | 69.10% | 9.3608<br>32 | 51 | 58.43% | 6.827<br>677 | Qpctl             |
| 54483  | 3249 | 70 | 61.90% | 6.0503<br>99 | 50 | 50.97% | 4.326<br>557 | Mefv              |
| 67532  | 3419 | 70 | 30.71% | 5.7495<br>61 | 66 | 30.54% | 5.427<br>089 | Mfap1a            |
| 68732  | 5158 | 70 | 37.15% | 3.8111<br>18 | 47 | 29.27% | 2.561<br>761 | Lrrc16a           |
| 320267 | 3740 | 70 | 58.24% | 5.2560<br>82 | 52 | 44.73% | 3.908<br>894 | Fubp3             |
| 16319  | 3217 | 70 | 53.56% | 6.1105<br>84 | 65 | 50.67% | 5.680<br>472 | Incenp            |
| 320683 | 6116 | 70 | 39.29% | 3.2141<br>51 | 64 | 33.18% | 2.941<br>945 | Zfp629            |

|                              |      |    |        |              |    |        |              |              |
|------------------------------|------|----|--------|--------------|----|--------|--------------|--------------|
| 14211                        | 5337 | 70 | 40.68% | 3.6832<br>95 | 67 | 37.29% | 3.529<br>391 | Smc2         |
| 66213                        | 2560 | 70 | 46.37% | 7.6788<br>08 | 76 | 41.91% | 8.346<br>334 | Med7         |
| 330817                       | 1332 | 70 | 86.64% | 14.758<br>07 | 71 | 85.66% | 14.98<br>567 | Dhps         |
| 71169                        | 7256 | 70 | 35.79% | 2.7091<br>71 | 81 | 36.49% | 3.138<br>411 | Nbas         |
| 26451                        | 1112 | 70 | 55.40% | 17.677<br>83 | 58 | 53.42% | 14.66<br>376 | Rpl27a       |
| 66349                        | 2389 | 70 | 68.86% | 8.2284<br>42 | 36 | 42.03% | 4.236<br>512 | Atp5sl       |
| 11992                        | 1345 | 70 | 81.93% | 14.615<br>43 | 71 | 81.78% | 14.84<br>083 | Auh          |
| 245000                       | 8074 | 70 | 28.94% | 2.4346<br>97 | 44 | 19%    | 1.532<br>096 | Atr          |
| 71375                        | 2611 | 70 | 63%    | 7.5288<br>19 | 41 | 47.49% | 4.414<br>679 | Foxn3        |
| 18115                        | 5355 | 70 | 25.73% | 3.6709<br>15 | 71 | 27.62% | 3.727<br>529 | Nnt          |
| 16205                        | 1505 | 70 | 74.95% | 13.061<br>63 | 51 | 61%    | 9.526<br>992 | Gimap1       |
| 27395                        | 4216 | 70 | 30.19% | 4.6626<br>54 | 57 | 26.19% | 3.800<br>987 | Mrpl15       |
| gi 227499340 ref NM_025735.2 | 983  | 70 | 91.86% | 19.997<br>71 | 80 | 92.47% | 22.88<br>014 | -            |
| 100678                       | 1554 | 70 | 72.52% | 12.649<br>77 | 59 | 71.30% | 10.67<br>39  | Psph         |
| 74504                        | 2028 | 70 | 72.53% | 9.6931<br>69 | 50 | 52.27% | 6.931<br>451 | Fam53a       |
| 80914                        | 1338 | 70 | 78.70% | 14.691<br>89 | 31 | 61.81% | 6.513<br>699 | Uck2         |
| 14976                        | 728  | 70 | 90.80% | 27.002<br>4  | 81 | 88.32% | 31.28<br>065 | H2-Ke2       |
| 72479                        | 2632 | 70 | 67.33% | 7.4687<br>49 | 69 | 66.60% | 7.370<br>303 | Hsd12        |
| 67211                        | 2014 | 70 | 65.79% | 9.7605<br>5  | 45 | 54.32% | 6.281<br>671 | Armc10       |
| 268567                       | 3904 | 70 | 52%    | 5.0352<br>84 | 31 | 25%    | 2.232<br>41  | Tmem22<br>9b |
| 14156                        | 2215 | 70 | 76.30% | 8.8748<br>3  | 70 | 67.31% | 8.884<br>775 | Fen1         |
| 66578                        | 1300 | 70 | 62.92% | 15.121<br>34 | 54 | 66%    | 11.67<br>811 | Mis18a       |

|                                     |      |    |        |              |     |        |              |                   |
|-------------------------------------|------|----|--------|--------------|-----|--------|--------------|-------------------|
| 17997                               | 3542 | 70 | 56.24% | 5.5499       | 50  | 48.22% | 3.968<br>657 | Nedd1             |
| 12371                               | 3896 | 70 | 53.41% | 5.0456<br>23 | 39  | 33.78% | 2.814<br>283 | Casp9             |
| 69875                               | 2661 | 70 | 23.34% | 7.3873<br>53 | 71  | 25.25% | 7.501<br>284 | Ndufa11           |
| 232440                              | 1827 | 70 | 56.27% | 10.759<br>58 | 58  | 55.45% | 8.925<br>069 | H2afj             |
| gi 124487472 ref N<br>M_001081426.1 | 8025 | 70 | 32.30% | 2.4495<br>64 | 69  | 27.59% | 2.417<br>276 | -                 |
| 73086                               | 4406 | 70 | 50.27% | 4.4615<br>86 | 53  | 39.51% | 3.381<br>843 | Rps6ka5           |
| gi 149252979 ref X<br>M_001475706.1 | 1114 | 70 | 23.25% | 17.646<br>09 | 100 | 21.18% | 25.23<br>695 | -                 |
| 19384                               | 2288 | 70 | 47.55% | 8.5916<br>73 | 69  | 46.33% | 8.478<br>425 | Ran               |
| 19724                               | 4179 | 70 | 48.41% | 4.7039<br>36 | 29  | 25.46% | 1.950<br>957 | Rfx1              |
| gi 142365745 ref N<br>M_009737.2    | 1581 | 70 | 82.61% | 12.433<br>74 | 56  | 76.85% | 9.958<br>141 | -                 |
| 114128                              | 1897 | 70 | 71.27% | 10.362<br>54 | 45  | 49.82% | 6.669<br>101 | Laptm4b           |
| 102209                              | 1528 | 69 | 82.79% | 12.681<br>23 | 54  | 78.73% | 9.935<br>564 | Snapc2            |
| 57316                               | 2957 | 69 | 34.36% | 6.5528<br>99 | 40  | 30.47% | 3.803<br>039 | C1d               |
| 67693                               | 620  | 69 | 84.84% | 31.253<br>1  | 73  | 94.84% | 33.10<br>193 | 2310003<br>F16Rik |
| 235497                              | 2192 | 69 | 77.87% | 8.8398<br>37 | 62  | 73.08% | 7.951<br>943 | Leo1              |
| 66172                               | 903  | 69 | 89.48% | 21.458<br>39 | 63  | 80.18% | 19.61<br>439 | Med11             |
| 12366                               | 3463 | 69 | 63.56% | 5.5954<br>15 | 34  | 34.42% | 2.760<br>251 | Casp2             |
| gi 146149306 ref N<br>M_054046.4    | 3756 | 69 | 50.24% | 5.1589<br>25 | 47  | 39.24% | 3.517<br>988 | -                 |
| 215015                              | 4238 | 69 | 36.39% | 4.5721<br>86 | 53  | 30.32% | 3.515<br>904 | Fam20b            |
| 118451                              | 2079 | 69 | 79.70% | 9.3203<br>09 | 52  | 67.63% | 7.031<br>872 | Mrps2             |
| 227835                              | 2554 | 69 | 66.05% | 7.5868<br>92 | 41  | 44.24% | 4.513<br>205 | Gtdc1             |
| 67326                               | 1241 | 69 | 86.62% | 15.613<br>96 | 73  | 85.01% | 16.53<br>763 | 1700037<br>H04Rik |

|                                 |      |    |        |              |    |        |              |          |
|---------------------------------|------|----|--------|--------------|----|--------|--------------|----------|
| 13549                           | 2520 | 69 | 66.11% | 7.6892<br>55 | 51 | 51.43% | 5.689<br>731 | Dyrk1b   |
| 242705                          | 4746 | 69 | 45.01% | 4.0827<br>9  | 35 | 27.45% | 2.073<br>301 | E2f2     |
| 671535                          | 3411 | 69 | 58.58% | 5.6807<br>16 | 45 | 43.39% | 3.708<br>967 | Parp10   |
| 215243                          | 2142 | 69 | 62.23% | 9.0461<br>82 | 22 | 35.01% | 2.887<br>522 | Traf3ip3 |
| 14791                           | 1086 | 69 | 64.09% | 17.842<br>47 | 85 | 69.34% | 22.00<br>449 | Emg1     |
| 231637                          | 3174 | 69 | 52.46% | 6.1048<br>9  | 24 | 32.86% | 2.125<br>82  | Ssh1     |
| 68646                           | 3731 | 69 | 47.55% | 5.1934<br>93 | 32 | 27.85% | 2.411<br>276 | Nadkd1   |
| 20912                           | 2406 | 69 | 16.17% | 8.0535<br>84 | 46 | 19.83% | 5.375<br>072 | Stxbp3a  |
| 14025                           | 3425 | 69 | 51.97% | 5.6574<br>96 | 40 | 30.74% | 3.283<br>383 | Bcl11a   |
| 16504                           | 5072 | 69 | 43.71% | 3.8203<br>71 | 73 | 44.24% | 4.046<br>371 | Kcnc3    |
| 79566                           | 3023 | 69 | 58.05% | 6.4098<br>32 | 45 | 48.13% | 4.185<br>01  | Sh3bp5l  |
| 68298                           | 4527 | 69 | 49.57% | 4.2803<br>01 | 72 | 46.85% | 4.471<br>406 | Ncapd2   |
| 208968                          | 4366 | 69 | 47.73% | 4.4381<br>41 | 55 | 40.06% | 3.541<br>613 | Zfp280c  |
| 114604                          | 6346 | 69 | 38.80% | 3.0534<br>07 | 39 | 24.42% | 1.727<br>773 | Prdm15   |
| 108903                          | 3912 | 69 | 47.42% | 4.9532<br>01 | 34 | 29.70% | 2.443<br>443 | Tbcd     |
| 56748                           | 968  | 69 | 78.10% | 20.017<br>48 | 71 | 71.49% | 20.62<br>078 | Nfu1     |
| gi 160333431 ref NM_026665.3    | 2515 | 69 | 68.23% | 7.7045<br>42 | 50 | 61.03% | 5.589<br>258 | -        |
| 109652                          | 1431 | 69 | 70.86% | 13.540<br>83 | 52 | 71.21% | 10.21<br>612 | Acy1     |
| 17920                           | 7868 | 69 | 32.09% | 2.4627<br>51 | 46 | 19.79% | 1.643<br>674 | Myo6     |
| 213233                          | 2080 | 69 | 75.14% | 9.3158<br>28 | 86 | 75.62% | 11.62<br>404 | Tapbpl   |
| gi 168823440 ref NM_001033259.3 | 1423 | 69 | 79.55% | 13.616<br>95 | 62 | 82.92% | 12.24<br>923 | -        |
| 58887                           | 3177 | 69 | 57.79% | 6.0991<br>26 | 71 | 55.90% | 6.282<br>945 | Repin1   |

|                                     |      |    |        |              |     |        |              |                   |
|-------------------------------------|------|----|--------|--------------|-----|--------|--------------|-------------------|
| 244049                              | 5810 | 69 | 42.79% | 3.3350<br>99 | 41  | 25.06% | 1.983<br>946 | Mctp2             |
| 217335                              | 5404 | 68 | 44.99% | 3.5336<br>97 | 30  | 22.78% | 1.560<br>731 | Fbf1              |
| 20316                               | 1284 | 68 | 47.59% | 14.872<br>35 | 70  | 45.64% | 15.32<br>693 | Sdf2              |
| 78903                               | 2642 | 68 | 59.20% | 7.2278<br>95 | 55  | 45.16% | 5.852<br>642 | Wmip1             |
| 216233                              | 2222 | 68 | 60.98% | 8.5941<br>03 | 40  | 45.50% | 5.061<br>02  | Socs2             |
| 76338                               | 2770 | 68 | 61.37% | 6.8938<br>98 | 57  | 57.51% | 5.785<br>184 | Rab2b             |
| 12122                               | 1906 | 68 | 71.14% | 10.018<br>94 | 62  | 65.01% | 9.145<br>152 | Bid               |
| 52357                               | 5042 | 68 | 47.62% | 3.7874<br>05 | 72  | 47.24% | 4.014<br>688 | Wwc2              |
| 69009                               | 1164 | 68 | 82.13% | 16.405<br>58 | 63  | 91.49% | 15.21<br>632 | Thap7             |
| gi 86476043 ref N<br>M_033623.5     | 3545 | 68 | 38.56% | 5.3867<br>69 | 60  | 43.95% | 4.758<br>358 | -                 |
| 52715                               | 2307 | 68 | 71.95% | 8.2774<br>59 | 60  | 59.08% | 7.311<br>825 | Ccdc43            |
| 68118                               | 1230 | 68 | 84.23% | 15.525<br>28 | 73  | 86.91% | 16.68<br>552 | 9430023<br>L20Rik |
| 245847                              | 1463 | 68 | 84.83% | 13.052<br>7  | 58  | 75.60% | 11.14<br>566 | Amdhd2            |
| 66646                               | 2630 | 68 | 65.55% | 7.2608<br>74 | 58  | 56.46% | 6.200<br>038 | Rpe               |
| 74008                               | 3292 | 68 | 63.67% | 5.8007<br>59 | 89  | 63.70% | 7.600<br>677 | Arsg              |
| 57443                               | 4659 | 68 | 42.73% | 4.0987<br>55 | 43  | 31.59% | 2.594<br>764 | Fbxo3             |
| gi 149251955 ref X<br>M_001004193.2 | 852  | 68 | 86.97% | 22.413<br>26 | 128 | 90.61% | 42.23<br>694 | -                 |
| 14731                               | 2036 | 68 | 74.71% | 9.3792<br>23 | 61  | 73.82% | 8.423<br>143 | Gpaal             |
| 15951                               | 2302 | 68 | 22.94% | 8.2954<br>38 | 99  | 23.85% | 12.09<br>072 | Ifi204            |
| 214359                              | 1874 | 68 | 77.48% | 10.190<br>02 | 64  | 77.32% | 9.601<br>355 | Tmem51            |
| 104457                              | 905  | 68 | 82.43% | 21.100<br>66 | 65  | 83.98% | 20.19<br>235 | 0610010<br>K14Rik |
| 67732                               | 941  | 68 | 81.08% | 20.293<br>41 | 45  | 75.13% | 13.44<br>451 | Iah1              |

|                                  |      |    |        |              |     |        |              |                   |
|----------------------------------|------|----|--------|--------------|-----|--------|--------------|-------------------|
| 71999                            | 2117 | 68 | 46.91% | 9.0203<br>58 | 60  | 43.13% | 7.968<br>058 | Fbxo22            |
| 232210                           | 1422 | 68 | 86.22% | 13.429<br>04 | 51  | 77%    | 10.08<br>307 | 8430410<br>A17Rik |
| 54402                            | 1078 | 68 | 90.72% | 17.714<br>38 | 54  | 87.57% | 14.08<br>306 | Stk19             |
| 56398                            | 2626 | 68 | 18.96% | 7.2719<br>34 | 84  | 19.31% | 8.993<br>043 | 1500003<br>O03Rik |
| 72183                            | 1879 | 68 | 46.46% | 10.162<br>9  | 74  | 49.28% | 11.07<br>202 | Snx6              |
| 240505                           | 5994 | 68 | 40.24% | 3.1858<br>69 | 90  | 42.14% | 4.221<br>316 | Cdc42bp<br>g      |
| 245638                           | 5907 | 68 | 40.36% | 3.2327<br>91 | 42  | 23.51% | 1.998<br>962 | Tbc1d8b           |
| gi 141803224 ref N<br>M_028811.2 | 2722 | 68 | 65.39% | 7.0154<br>66 | 37  | 47.80% | 3.821<br>516 | -                 |
| 71323                            | 1733 | 68 | 78.02% | 11.019<br>1  | 24  | 45.53% | 3.893<br>452 | Rassf8            |
| 69068                            | 1331 | 68 | 83.77% | 14.347<br>18 | 132 | 95.19% | 27.88<br>162 | 1810011<br>O10Rik |
| 52187                            | 5047 | 68 | 45.18% | 3.7836<br>53 | 32  | 27.86% | 1.782<br>538 | Rragd             |
| 70427                            | 2588 | 68 | 67.31% | 7.3787<br>08 | 52  | 60.47% | 5.648<br>865 | Mier2             |
| 214150                           | 7635 | 68 | 33.02% | 2.5011<br>26 | 50  | 27.06% | 1.841<br>124 | Eif2c3            |
| 68763                            | 597  | 67 | 89.95% | 31.516<br>37 | 82  | 91.96% | 38.61<br>55  | 1110038<br>B12Rik |
| 12047                            | 796  | 67 | 30.15% | 23.637<br>28 | 86  | 31.91% | 30.37<br>439 | Bcl2a1d           |
| 66108                            | 1322 | 67 | 75.49% | 14.232<br>43 | 99  | 86.84% | 21.05<br>358 | Ndufa9            |
| 54397                            | 1701 | 67 | 69.90% | 11.061<br>3  | 88  | 73.96% | 14.54<br>456 | Ppt2              |
| 18583                            | 3488 | 67 | 53.84% | 5.3942<br>87 | 56  | 48.22% | 4.513<br>71  | Pde7a             |
| 12033                            | 1954 | 67 | 72.67% | 9.6291<br>06 | 55  | 58.90% | 7.913<br>348 | Bcap29            |
| 235047                           | 1786 | 67 | 60.13% | 10.534<br>87 | 57  | 59.52% | 8.972<br>542 | Zfp809            |
| 1E+08                            | 3994 | 67 | 32.80% | 4.7108<br>84 | 37  | 26.39% | 2.604<br>449 | Gm3813            |
| 107732                           | 1682 | 67 | 82.40% | 11.186<br>25 | 74  | 84.60% | 12.36<br>881 | Mrpl10            |

|                              |      |    |        |              |     |        |              |                   |
|------------------------------|------|----|--------|--------------|-----|--------|--------------|-------------------|
| 320376                       | 6142 | 67 | 41.75% | 3.0633<br>79 | 22  | 15.47% | 1.007<br>013 | Bcor11            |
| 1E+08                        | 2482 | 67 | 67.45% | 7.5806<br>9  | 51  | 60.96% | 5.776<br>842 | Fam129c           |
| 14536                        | 6185 | 67 | 39.74% | 3.0420<br>81 | 63  | 37.07% | 2.863<br>67  | Nr6a1             |
| 71986                        | 1871 | 67 | 68.15% | 10.056<br>27 | 61  | 73.86% | 9.165<br>964 | Ddx28             |
| 66383                        | 887  | 67 | 56.37% | 21.212<br>26 | 72  | 58.85% | 22.82<br>081 | Iscu              |
| 17952                        | 6705 | 67 | 23.25% | 2.8061<br>55 | 85  | 28.53% | 3.564<br>037 | Naip6             |
| gi 148747482 ref NM_017404.3 | 1042 | 67 | 91.17% | 18.056<br>88 | 74  | 92.32% | 19.96<br>577 | -                 |
| gi 10946575 ref NM_021274.1  | 1063 | 67 | 52.02% | 17.700<br>16 | 284 | 53.90% | 75.11<br>163 | -                 |
| 56876                        | 2949 | 67 | 59.68% | 6.3802<br>21 | 63  | 58.39% | 6.006<br>035 | Nelf              |
| 102323                       | 3059 | 67 | 55.05% | 6.1507<br>92 | 48  | 47.20% | 4.411<br>476 | Dcun1d2           |
| 192187                       | 7995 | 67 | 32.05% | 2.3533<br>8  | 146 | 45.84% | 5.134<br>008 | Stab1             |
| 15461                        | 2272 | 67 | 41.99% | 8.2813<br>7  | 52  | 38.51% | 6.434<br>535 | Hras1             |
| 666336                       | 7069 | 67 | 5.80%  | 2.6616<br>6  | 87  | 5.50%  | 3.460<br>058 | -                 |
| 212555                       | 2047 | 67 | 72.20% | 9.1916<br>33 | 36  | 55.50% | 4.944<br>322 | Pq1c2             |
| gi 39930594 ref NM_199009.1  | 3441 | 67 | 50.51% | 5.4679<br>66 | 45  | 44.20% | 3.676<br>63  | -                 |
| 94094                        | 2600 | 67 | 52.04% | 7.2366<br>43 | 26  | 33.15% | 2.811<br>397 | Trim34a           |
| 22240                        | 2066 | 67 | 69.36% | 9.1071<br>02 | 53  | 59.87% | 7.212<br>198 | Dpysl3            |
| 67905                        | 1848 | 67 | 60.88% | 10.181<br>42 | 65  | 59.90% | 9.888<br>57  | Ppm1m             |
| 386612                       | 1461 | 67 | 80.90% | 12.878<br>35 | 57  | 79.67% | 10.96<br>849 | Thoc6             |
| 67017                        | 3609 | 67 | 53.28% | 5.2134<br>31 | 53  | 50.85% | 4.128<br>679 | 2010011<br>I20Rik |
| 385658                       | 6430 | 67 | 26.87% | 2.9261<br>7  | 41  | 20.40% | 1.792<br>648 | Nxpe3             |
| 26558                        | 2445 | 67 | 57.83% | 7.6954<br>08 | 61  | 49.94% | 7.014<br>118 | Homer3            |

|        |      |    |        |              |     |        |              |                   |
|--------|------|----|--------|--------------|-----|--------|--------------|-------------------|
| 14664  | 3272 | 67 | 57.18% | 5.7503<br>89 | 43  | 40.95% | 3.694<br>684 | Slc6a9            |
| 67393  | 2311 | 67 | 70.32% | 8.1416<br>15 | 34  | 46.99% | 4.136<br>196 | Cxxc5             |
| 229499 | 2042 | 67 | 74.68% | 9.2141<br>39 | 29  | 38.10% | 3.992<br>679 | Fcrl1             |
| 24064  | 2103 | 67 | 72.14% | 8.9468<br>72 | 43  | 61.06% | 5.748<br>457 | Spry2             |
| 71063  | 5630 | 67 | 38.79% | 3.3419<br>67 | 49  | 34.65% | 2.446<br>864 | Zfp597            |
| 63986  | 1006 | 67 | 45.03% | 18.703<br>05 | 86  | 27.34% | 24.03<br>381 | Gmfg              |
| 13610  | 4484 | 67 | 46.39% | 4.1960<br>91 | 36  | 28.28% | 2.257<br>143 | S1pr3             |
| 69546  | 1524 | 67 | 72.38% | 12.345<br>98 | 44  | 70.14% | 8.116<br>893 | Mapklip<br>1      |
| 66983  | 3278 | 67 | 58.39% | 5.7398<br>63 | 62  | 55.09% | 5.317<br>468 | Zfp830            |
| 215193 | 5548 | 67 | 41.15% | 3.3913<br>61 | 28  | 18.46% | 1.418<br>874 | Diexf             |
| 624341 | 1642 | 67 | 30.15% | 11.458<br>75 | 119 | 27.83% | 20.37<br>492 | Olf856-<br>ps1    |
| 18032  | 3565 | 67 | 45.58% | 5.2777<br>76 | 64  | 47.12% | 5.047<br>108 | Nfix              |
| 210544 | 3503 | 67 | 41.76% | 5.3711<br>88 | 59  | 42.71% | 4.735<br>153 | Wdr67             |
| 67388  | 1065 | 67 | 43.57% | 17.666<br>92 | 72  | 46.10% | 19.00<br>663 | 1110008<br>F13Rik |
| 12340  | 3187 | 66 | 13.74% | 5.8156<br>41 | 49  | 14.56% | 4.322<br>511 | Capza1            |
| 320119 | 4034 | 66 | 51.07% | 4.5945<br>58 | 69  | 47.79% | 4.808<br>784 | Rps6kc1           |
| 74718  | 2663 | 66 | 58.17% | 6.9599<br>88 | 59  | 54.94% | 6.228<br>78  | Snx16             |
| 16534  | 2041 | 66 | 73.15% | 9.0810<br>62 | 60  | 65.61% | 8.264<br>762 | Kcnn4             |
| 232431 | 2072 | 66 | 67.86% | 8.9451<br>97 | 150 | 82.48% | 20.35<br>277 | Gpre5a            |
| 67205  | 953  | 66 | 81.32% | 19.448<br>53 | 63  | 81.85% | 18.58<br>531 | Utp111            |
| 12328  | 1387 | 66 | 77.51% | 13.362<br>98 | 75  | 84.35% | 15.20<br>222 | Caml              |
| 69976  | 2520 | 66 | 49.92% | 7.3549<br>39 | 52  | 44.21% | 5.801<br>295 | Galk2             |



|                                     |      |    |        |              |    |        |              |             |
|-------------------------------------|------|----|--------|--------------|----|--------|--------------|-------------|
| 68427                               | 2273 | 66 | 75.49% | 8.1541<br>78 | 72 | 72.81% | 8.905<br>436 | Slc39a13    |
| 26464                               | 1811 | 66 | 77.14% | 10.234<br>37 | 91 | 88.24% | 14.12<br>684 | Vnn3        |
| 73711                               | 1077 | 66 | 88.86% | 17.209<br>33 | 43 | 88.39% | 11.22<br>47  | Fam125a     |
| 67675                               | 673  | 66 | 77.86% | 27.540<br>04 | 98 | 91.53% | 40.93<br>861 | Cuta        |
| 101592                              | 3637 | 66 | 60.71% | 5.0960<br>81 | 41 | 39.10% | 3.169<br>295 | Eftud1      |
| 384281                              | 1777 | 66 | 73.16% | 10.430<br>19 | 36 | 53.40% | 5.695<br>57  | Gatc        |
| 66411                               | 1173 | 66 | 75.19% | 15.800<br>89 | 65 | 64.88% | 15.57<br>892 | Tbcb        |
| gi 149255577 ref X<br>M_001476057.1 | 396  | 66 | 76.77% | 46.804<br>16 | 40 | 62.12% | 28.39<br>795 | -           |
| 16882                               | 5945 | 66 | 37.51% | 3.1176<br>53 | 44 | 27.17% | 2.080<br>765 | Lig3        |
| 18457                               | 3494 | 66 | 41.56% | 5.3046<br>5  | 55 | 31.37% | 4.425<br>496 | Bloc1s6     |
| gi 149253961 ref X<br>M_001474702.1 | 7444 | 66 | 25.90% | 2.4898<br>51 | 57 | 23.32% | 2.152<br>735 | -           |
| 70408                               | 4160 | 66 | 51.75% | 4.4553<br>96 | 43 | 38.37% | 2.906<br>011 | Polr3f      |
| 16157                               | 1847 | 66 | 43.48% | 10.034<br>89 | 77 | 49%    | 11.72<br>049 | Il11ra1     |
| 225010                              | 4476 | 66 | 48.30% | 4.1408<br>51 | 36 | 29.20% | 2.261<br>177 | Lclat1      |
| 13361                               | 5307 | 66 | 38.48% | 3.4924<br>53 | 48 | 27.08% | 2.542<br>812 | Dhfr        |
| 69774                               | 1687 | 66 | 77.59% | 10.986<br>63 | 21 | 40.96% | 3.499<br>664 | Ms4a6b      |
| 70584                               | 2898 | 66 | 58.63% | 6.3956       | 61 | 54.11% | 5.917<br>709 | Pak4        |
| gi 110625688 ref N<br>M_153197.3    | 1300 | 66 | 74.85% | 14.257<br>27 | 70 | 86.46% | 15.13<br>829 | -           |
| 56552                               | 2568 | 66 | 39.91% | 7.2174<br>64 | 61 | 35.05% | 6.678<br>162 | Vmn2r2<br>6 |
| 66597                               | 1640 | 66 | 62.80% | 11.301<br>49 | 82 | 67.74% | 14.05<br>698 | Trim13      |
| gi 133892630 ref N<br>M_022880.2    | 2012 | 66 | 72.91% | 9.2119<br>52 | 29 | 42.10% | 4.052<br>212 | -           |
| 66834                               | 686  | 66 | 91.98% | 27.018<br>15 | 55 | 80.90% | 22.54<br>035 | Acot13      |

|        |      |    |        |              |    |        |              |                   |
|--------|------|----|--------|--------------|----|--------|--------------|-------------------|
| 77683  | 5091 | 66 | 40.25% | 3.6406<br>3  | 36 | 22.75% | 1.988<br>024 | Ehmt1             |
| 269400 | 4451 | 66 | 48.73% | 4.1641<br>09 | 44 | 37.14% | 2.779<br>183 | Rtel1             |
| 68047  | 1701 | 66 | 76.72% | 10.896<br>21 | 68 | 74.90% | 11.23<br>898 | Mpnd              |
| 209387 | 3770 | 66 | 46.71% | 4.9162<br>99 | 66 | 52.20% | 4.921<br>808 | Trim30d           |
| 73690  | 1081 | 66 | 72.16% | 17.145<br>65 | 61 | 71.14% | 15.86<br>45  | Glipr1            |
| 546071 | 5334 | 66 | 16.42% | 3.4747<br>75 | 44 | 14.90% | 2.319<br>112 | Mast3             |
| 69046  | 1915 | 66 | 44.75% | 9.6785<br>63 | 59 | 40.99% | 8.661<br>744 | Isca1             |
| 18452  | 2284 | 66 | 62.74% | 8.1149<br>07 | 78 | 71.58% | 9.601<br>092 | P4ha2             |
| 20534  | 2445 | 66 | 65.97% | 7.5805<br>51 | 67 | 67.73% | 7.704<br>032 | Slc4a1ap          |
| 54384  | 3446 | 66 | 47.42% | 5.3785<br>4  | 90 | 51.60% | 7.342<br>591 | Mtmr7             |
| 51813  | 3405 | 66 | 54.45% | 5.4433<br>03 | 79 | 56.62% | 6.522<br>77  | Ccnc              |
| 68845  | 1101 | 66 | 82.02% | 16.834<br>19 | 50 | 72.93% | 12.76<br>747 | Pih1d1            |
| 66671  | 1976 | 66 | 60.83% | 9.3797<br>81 | 58 | 58.91% | 8.252<br>075 | Ccnh              |
| 192236 | 2800 | 66 | 60.79% | 6.6194<br>46 | 53 | 57.71% | 5.321<br>572 | Hps1              |
| 244548 | 4709 | 66 | 46.36% | 3.9359<br>63 | 67 | 43.05% | 4.000<br>076 | Elmod2            |
| 26372  | 2910 | 66 | 57.01% | 6.3692<br>26 | 38 | 42.23% | 3.671<br>24  | Clcn6             |
| 547127 | 4710 | 66 | 34.76% | 3.9351<br>27 | 51 | 32.40% | 3.044<br>187 | Tmem18<br>1b-ps   |
| 241452 | 2817 | 66 | 59.03% | 6.5794<br>99 | 16 | 21.26% | 1.596<br>817 | Dhrs9             |
| 67109  | 1899 | 66 | 68.35% | 9.7601<br>09 | 46 | 58.40% | 6.810<br>123 | Zfp787            |
| 66756  | 4539 | 66 | 47.65% | 4.0833<br>77 | 27 | 22.54% | 1.672<br>344 | 4933411<br>K20Rik |
| 73545  | 3097 | 65 | 59.02% | 5.8939<br>69 | 60 | 48.98% | 5.446<br>684 | 1700094<br>D03Rik |
| 319520 | 2427 | 65 | 58.47% | 7.5210<br>64 | 40 | 50.31% | 4.633<br>534 | Dusp4             |

|                                     |      |    |        |              |     |        |              |         |
|-------------------------------------|------|----|--------|--------------|-----|--------|--------------|---------|
| 386649                              | 1355 | 65 | 54.69% | 13.471<br>31 | 84  | 54.83% | 17.42<br>858 | Nsfl1c  |
| 328580                              | 6957 | 65 | 32.92% | 2.6237<br>78 | 39  | 20.35% | 1.576<br>031 | Tubgcp6 |
| 66169                               | 1126 | 65 | 28.24% | 16.211<br>03 | 97  | 28.95% | 24.21<br>896 | Tomm7   |
| 19094                               | 2452 | 65 | 63.78% | 7.4443<br>81 | 32  | 44.49% | 3.669<br>033 | Mapk11  |
| 69754                               | 1886 | 65 | 73.33% | 9.6784<br>85 | 56  | 62.94% | 8.347<br>731 | Fbxo7   |
| 11564                               | 2109 | 65 | 60.79% | 8.6551<br>08 | 58  | 64.72% | 7.731<br>674 | Adsl    |
| 68667                               | 4245 | 65 | 45.84% | 4.3000<br>29 | 56  | 42.21% | 3.708<br>792 | Trpm4   |
| 108800                              | 9896 | 65 | 24.56% | 1.8445<br>46 | 62  | 24.34% | 1.761<br>384 | Ston2   |
| 20779                               | 3887 | 65 | 51.87% | 4.6960<br>7  | 72  | 51.92% | 5.207<br>629 | Src     |
| 11769                               | 1277 | 65 | 81.36% | 14.294<br>14 | 59  | 75.57% | 12.98<br>922 | Ap1s1   |
| 268564                              | 4001 | 65 | 28.12% | 4.5622<br>65 | 76  | 22.97% | 5.340<br>318 | Zbtb1   |
| 75871                               | 2163 | 65 | 63.34% | 8.4390<br>3  | 53  | 61.17% | 6.888<br>767 | Zfp821  |
| 53609                               | 2173 | 65 | 71.33% | 8.4001<br>94 | 50  | 60.88% | 6.468<br>929 | Clasrp  |
| 50497                               | 1791 | 65 | 63.87% | 10.191<br>86 | 60  | 68.51% | 9.418<br>414 | Hspa14  |
| 140792                              | 3322 | 65 | 60.05% | 5.4947<br>69 | 172 | 81.01% | 14.55<br>63  | Colec12 |
| 234373                              | 4111 | 65 | 44.37% | 4.4401<br>9  | 33  | 27.61% | 2.256<br>777 | Sugp2   |
| 16185                               | 2712 | 65 | 66.48% | 6.7306<br>87 | 29  | 40.97% | 3.006<br>287 | Il2rb   |
| 68713                               | 702  | 65 | 69.52% | 26.002<br>31 | 78  | 70.80% | 31.23<br>774 | Ifitm1  |
| 231841                              | 3856 | 65 | 48.16% | 4.7338<br>23 | 24  | 23.21% | 1.749<br>832 | Baat1   |
| 66585                               | 1613 | 65 | 70.37% | 11.316<br>57 | 50  | 76.75% | 8.714<br>807 | Snrnp40 |
| gi 149257390 ref X<br>M_001478817.1 | 3387 | 65 | 24.53% | 5.3893<br>19 | 78  | 26.13% | 6.474<br>43  | -       |
| 192169                              | 1556 | 65 | 79.63% | 11.731<br>12 | 46  | 67.67% | 8.311<br>327 | Ufsp2   |

|                                  |      |    |        |              |     |        |              |                   |
|----------------------------------|------|----|--------|--------------|-----|--------|--------------|-------------------|
| 74041                            | 3450 | 65 | 53.65% | 5.2909<br>05 | 64  | 49.28% | 5.215<br>344 | 4632434<br>I11Rik |
| 22143                            | 1747 | 65 | 13.57% | 10.448<br>55 | 59  | 17.74% | 9.494<br>7   | Tuba1b            |
| 77578                            | 4652 | 65 | 42.41% | 3.9238<br>23 | 41  | 35.36% | 2.477<br>8   | Bcl9              |
| 56318                            | 4488 | 65 | 44.59% | 4.0672<br>06 | 41  | 33.71% | 2.568<br>344 | Acpp              |
| 327900                           | 3056 | 65 | 58.34% | 5.9730<br>44 | 76  | 66.03% | 6.991<br>693 | Ubtd2             |
| 68943                            | 2367 | 65 | 42.54% | 7.7117<br>12 | 51  | 40.47% | 6.057<br>509 | Pink1             |
| 56273                            | 1942 | 65 | 75.03% | 9.3993<br>94 | 58  | 81.20% | 8.396<br>55  | Pex14             |
| 231327                           | 4008 | 65 | 39.07% | 4.5542<br>97 | 47  | 37.70% | 3.296<br>797 | Ppat              |
| 66214                            | 934  | 64 | 89.08% | 19.242<br>82 | 133 | 95.72% | 40.03<br>381 | 1190002<br>H23Rik |
| 223527                           | 2429 | 64 | 47.43% | 7.3992<br>58 | 54  | 41.29% | 6.250<br>12  | Eny2              |
| 67710                            | 868  | 64 | 90.90% | 20.705<br>99 | 61  | 83.87% | 19.75<br>751 | Polr2g            |
| 216154                           | 3218 | 64 | 57.99% | 5.5850<br>83 | 61  | 50.68% | 5.329<br>248 | Med16             |
| 72836                            | 3499 | 64 | 43.47% | 5.1365<br>53 | 61  | 35.55% | 4.901<br>263 | Pot1b             |
| 21652                            | 2429 | 64 | 29.52% | 7.3992<br>58 | 53  | 26.35% | 6.134<br>377 | Phf1              |
| gi 6681132 ref NM<br>_007828.1   | 1410 | 64 | 74.33% | 12.746<br>66 | 50  | 79.93% | 9.969<br>492 | -                 |
| 23873                            | 1089 | 64 | 77.78% | 16.503<br>95 | 36  | 59.60% | 9.293<br>873 | Faim              |
| 227693                           | 4123 | 64 | 51.78% | 4.3591<br>55 | 32  | 30.46% | 2.182<br>02  | Zer1              |
| 233231                           | 4185 | 64 | 44.49% | 4.2945<br>75 | 11  | 11.78% | 0.738<br>957 | Mrgprb1           |
| gi 158749609 ref N<br>M_183148.2 | 5316 | 64 | 36.08% | 3.3808<br>87 | 47  | 32.64% | 2.485<br>622 | -                 |
| 116914                           | 3546 | 64 | 48.67% | 5.0684<br>71 | 69  | 51.21% | 5.470<br>569 | Slc19a2           |
| 18107                            | 1838 | 64 | 16.92% | 9.7784<br>54 | 49  | 17.25% | 7.495<br>018 | Nmt1              |
| 100702                           | 4329 | 64 | 32.43% | 4.1517<br>2  | 120 | 38.99% | 7.793<br>199 | Gbp6              |

|                                     |      |    |        |              |     |        |              |                   |
|-------------------------------------|------|----|--------|--------------|-----|--------|--------------|-------------------|
| 231123                              | 1980 | 64 | 67.12% | 9.0771<br>71 | 46  | 65.40% | 6.531<br>527 | Haus3             |
| 28240                               | 7292 | 64 | 32.09% | 2.4647<br>28 | 53  | 27.13% | 2.043<br>39  | Trpm2             |
| 19718                               | 1518 | 64 | 76.61% | 11.839<br>79 | 37  | 62.12% | 6.852<br>548 | Rfc2              |
| 170716                              | 1731 | 64 | 74.99% | 10.382<br>9  | 68  | 75.79% | 11.04<br>419 | Cyp4f13           |
| 20933                               | 3466 | 64 | 64.22% | 5.1854<br>58 | 39  | 34.48% | 3.163<br>43  | Med22             |
| 244713                              | 4050 | 64 | 49.90% | 4.4377<br>28 | 53  | 44.17% | 3.679<br>112 | Zfp317            |
| 16601                               | 3263 | 64 | 16.40% | 5.5080<br>59 | 96  | 16.09% | 8.271<br>348 | Klf9              |
| 214669                              | 3430 | 64 | 53.70% | 5.2398<br>83 | 38  | 40.55% | 3.114<br>667 | L3mbtl2           |
| 57314                               | 2279 | 64 | 69.59% | 7.8862<br>65 | 61  | 64.90% | 7.525<br>019 | Th11              |
| 170938                              | 2963 | 64 | 55.15% | 6.0657<br>43 | 46  | 49.81% | 4.364<br>639 | Zfp617            |
| 78670                               | 1276 | 64 | 73.04% | 14.085<br>26 | 67  | 87.93% | 14.76<br>204 | Plekhj1           |
| 494504                              | 2799 | 64 | 59.88% | 6.4211<br>5  | 66  | 59.02% | 6.629<br>231 | Apcdd1            |
| 28028                               | 2103 | 64 | 70.66% | 8.5462<br>66 | 71  | 69.04% | 9.491<br>639 | Mrpl50            |
| 18245                               | 1092 | 64 | 25.73% | 16.458<br>61 | 57  | 24.08% | 14.67<br>487 | Oaz1              |
| gi 19263323 ref N<br>M_023671.1     | 1475 | 64 | 74.03% | 12.184<br>95 | 62  | 74.51% | 11.81<br>74  | -                 |
| 11855                               | 5197 | 64 | 39.37% | 3.4583<br>02 | 42  | 32.33% | 2.272<br>054 | Arhgap5           |
| 56187                               | 2547 | 64 | 54.85% | 7.0564<br>58 | 70  | 65.37% | 7.726<br>65  | Rabgga            |
| gi 133892528 ref N<br>M_009465.3    | 4119 | 64 | 48.39% | 4.3633<br>89 | 76  | 51.03% | 5.187<br>33  | -                 |
| 13650                               | 2955 | 64 | 59.09% | 6.0821<br>65 | 61  | 58.48% | 5.803<br>56  | Rhbdfl            |
| gi 149253461 ref X<br>M_001471788.1 | 748  | 64 | 36.36% | 24.027<br>8  | 110 | 46.79% | 41.34<br>407 | -                 |
| 381236                              | 2721 | 64 | 38.48% | 6.6052<br>18 | 61  | 45.06% | 6.302<br>653 | Lipo1             |
| 75623                               | 1265 | 64 | 73.91% | 14.207<br>75 | 78  | 80.87% | 17.33<br>509 | 1700029<br>F09Rik |

|                              |       |    |        |              |    |        |              |             |
|------------------------------|-------|----|--------|--------------|----|--------|--------------|-------------|
| 68671                        | 1908  | 63 | 73.90% | 9.2725<br>22 | 72 | 68.66% | 10.60<br>904 | Pcyt2       |
| gi 118130919 ref NM_133732.2 | 2562  | 63 | 63.08% | 6.9055<br>32 | 65 | 68.15% | 7.132<br>739 | -           |
| 73683                        | 2183  | 63 | 65.41% | 8.1044<br>31 | 37 | 55.47% | 4.765<br>079 | Atg16l2     |
| 113868                       | 1758  | 63 | 55.40% | 10.063<br>69 | 44 | 51.59% | 7.036<br>488 | Acaa1a      |
| 70809                        | 2466  | 63 | 59.69% | 7.1743<br>6  | 82 | 65.25% | 9.348<br>521 | Clec2g      |
| 234695                       | 2504  | 63 | 66.41% | 7.0654<br>84 | 29 | 38.74% | 3.256<br>01  | Rltpr       |
| 66317                        | 1274  | 63 | 75.90% | 13.886<br>95 | 66 | 76.30% | 14.56<br>454 | Wdr61       |
| 237400                       | 3269  | 63 | 55%    | 5.4120<br>44 | 56 | 46.65% | 4.816<br>097 | Mex3d       |
| 68626                        | 2781  | 63 | 59.55% | 6.3617<br>31 | 48 | 52.36% | 4.852<br>464 | Elac2       |
| 207425                       | 4566  | 63 | 45.09% | 3.8747<br>2  | 41 | 28.14% | 2.524<br>469 | Wdr11       |
| 22785                        | 5476  | 63 | 36.67% | 3.2308<br>2  | 66 | 41.42% | 3.388<br>462 | Slc30a4     |
| 53975                        | 2710  | 63 | 55.72% | 6.5284<br>03 | 35 | 42.55% | 3.630<br>955 | Ddx20       |
| 54393                        | 4486  | 63 | 41.02% | 3.9438<br>19 | 52 | 38.32% | 3.258<br>864 | Gabbr1      |
| 70652                        | 2292  | 63 | 72.16% | 7.7190<br>11 | 65 | 62.48% | 7.972<br>983 | Tmem14<br>4 |
| 14086                        | 2667  | 63 | 59.02% | 6.6336<br>61 | 60 | 56.92% | 6.324<br>852 | Fscn1       |
| 233328                       | 7467  | 63 | 26.44% | 2.3693<br>55 | 55 | 24.15% | 2.070<br>802 | Lrrk1       |
| 328329                       | 10671 | 63 | 22.94% | 1.6579<br>49 | 26 | 10.52% | 0.685        | Mast4       |
| 110094                       | 4714  | 63 | 45.06% | 3.7530<br>7  | 52 | 37.97% | 3.101<br>244 | Phka2       |
| 110279                       | 6537  | 63 | 36.44% | 2.7064<br>36 | 46 | 26.66% | 1.978<br>342 | Bcr         |
| 19364                        | 7062  | 63 | 32.43% | 2.5052<br>35 | 29 | 15.87% | 1.154<br>496 | Rad51l3     |
| 67387                        | 1412  | 63 | 72.73% | 12.529<br>73 | 61 | 72.73% | 12.14<br>555 | Unc50       |
| 16588                        | 1379  | 63 | 73.46% | 12.829<br>57 | 68 | 79.48% | 13.86<br>33  | Kin         |

|        |      |    |        |              |    |        |              |                   |
|--------|------|----|--------|--------------|----|--------|--------------|-------------------|
| 381201 | 3092 | 63 | 54.50% | 5.7218<br>54 | 23 | 31.57% | 2.091<br>272 | Gm962             |
| 54399  | 1552 | 63 | 76.48% | 11.399<br>47 | 73 | 86.98% | 13.22<br>371 | Bet11             |
| 22340  | 1298 | 63 | 69.49% | 13.630<br>18 | 58 | 65.25% | 12.56<br>248 | Vegfb             |
| 72354  | 2570 | 63 | 64.90% | 6.8840<br>36 | 55 | 52.06% | 6.016<br>608 | Ttc4              |
| 66714  | 1595 | 63 | 67.34% | 11.092<br>15 | 59 | 61.44% | 10.39<br>952 | 4921524<br>J17Rik |
| 28126  | 1734 | 63 | 53%    | 10.202<br>98 | 72 | 60.84% | 11.67<br>362 | Nop16             |
| 234076 | 4533 | 63 | 40.24% | 3.9029<br>28 | 43 | 35.52% | 2.666<br>888 | Tmco3             |
| 109900 | 1589 | 63 | 70.86% | 11.134<br>03 | 83 | 89.18% | 14.68<br>508 | Asl               |
| 58988  | 1491 | 63 | 72.10% | 11.865<br>84 | 54 | 81.42% | 10.18<br>212 | Rps6kb2           |
| 66525  | 1179 | 63 | 85.41% | 15.005<br>91 | 33 | 64.55% | 7.869<br>049 | Timm50            |
| 21371  | 503  | 63 | 75.94% | 35.172<br>91 | 70 | 86.08% | 39.12<br>48  | Tbca              |
| 12655  | 1567 | 63 | 67.58% | 11.290<br>35 | 76 | 70.20% | 13.63<br>536 | Chi3l3            |
| 235040 | 2541 | 63 | 50.96% | 6.9626<br>02 | 58 | 46.95% | 6.417<br>198 | Atg4d             |
| 73666  | 2326 | 63 | 66.94% | 7.6061<br>79 | 56 | 64.14% | 6.768<br>625 | Thoc3             |
| 17827  | 1522 | 63 | 67.61% | 11.624<br>16 | 66 | 64.91% | 12.19<br>134 | Mtx1              |
| 12286  | 7929 | 63 | 29.97% | 2.2312<br>99 | 69 | 33.64% | 2.446<br>543 | Cacna1a           |
| 72018  | 1950 | 63 | 63.54% | 9.0728<br>06 | 53 | 63.64% | 7.641<br>232 | Fundc1            |
| 76478  | 1686 | 63 | 79.12% | 10.493<br>46 | 78 | 78.41% | 13.00<br>646 | Haus8             |
| 97031  | 2825 | 63 | 57.63% | 6.2626<br>45 | 32 | 35.08% | 3.184<br>591 | Tprn              |
| 72580  | 2364 | 63 | 65.02% | 7.4839<br>14 | 38 | 51.65% | 4.519<br>165 | Zufsp             |
| 78658  | 5519 | 63 | 36.66% | 3.2056<br>48 | 53 | 35.75% | 2.699<br>837 | Ncapd3            |
| 108671 | 1631 | 62 | 69.04% | 10.675<br>14 | 36 | 52.18% | 6.205<br>413 | Dnajc9            |

|                                 |      |    |        |              |    |        |              |              |
|---------------------------------|------|----|--------|--------------|----|--------|--------------|--------------|
| 21838                           | 1753 | 62 | 80.83% | 9.9322<br>01 | 6  | 16.77% | 0.962<br>258 | Thy1         |
| 69731                           | 763  | 62 | 98.43% | 22.819<br>33 | 47 | 94.50% | 17.31<br>791 | Gemin7       |
| 108660                          | 1971 | 62 | 36.99% | 8.8336<br>62 | 40 | 31.61% | 5.705<br>523 | Rnf187       |
| 108652                          | 2086 | 62 | 63.33% | 8.3466<br>67 | 42 | 48.18% | 5.660<br>53  | Slc35b3      |
| 14745                           | 3451 | 62 | 50.54% | 5.0452<br>47 | 83 | 51.14% | 6.761<br>69  | Lpar1        |
| 100608                          | 2039 | 62 | 67.29% | 8.5390<br>62 | 65 | 74.79% | 8.962<br>275 | Noc4l        |
| 668253                          | 1708 | 62 | 60.07% | 10.193<br>88 | 76 | 68.38% | 12.50<br>973 | Dleu2        |
| 67048                           | 4174 | 62 | 37.11% | 4.1713<br>34 | 61 | 39.10% | 4.108<br>653 | Vma21        |
| 50798                           | 5384 | 62 | 37.56% | 3.2338<br>68 | 44 | 28.05% | 2.297<br>575 | Gne          |
| 105446                          | 1560 | 62 | 81.60% | 11.160<br>99 | 47 | 73.01% | 8.470<br>233 | Gmpr2        |
| 66362                           | 1035 | 62 | 77.20% | 16.822<br>36 | 41 | 74.40% | 11.13<br>693 | Exosc3       |
| 50762                           | 1955 | 62 | 55.19% | 8.9059<br>58 | 55 | 45.52% | 7.909<br>3   | Fbxo6        |
| 67160                           | 1565 | 62 | 11.37% | 11.125<br>33 | 45 | 10.99% | 8.083<br>888 | Eef1g        |
| 320435                          | 2888 | 62 | 53.15% | 6.0287<br>91 | 64 | 55.92% | 6.230<br>242 | Rinl         |
| 236794                          | 4920 | 62 | 46.26% | 3.5388<br>51 | 39 | 30.37% | 2.228<br>546 | Slc9a6       |
| 72649                           | 3422 | 62 | 56.11% | 5.0880<br>03 | 57 | 53.71% | 4.682<br>922 | Tmem20<br>9  |
| 30946                           | 4456 | 62 | 31.22% | 3.9073<br>49 | 35 | 21.07% | 2.208<br>233 | Abt1         |
| gi 20270197 ref N<br>M_025897.1 | 2293 | 62 | 69.21% | 7.5931<br>74 | 51 | 62.67% | 6.252<br>997 | -            |
| 68229                           | 3183 | 62 | 41.09% | 5.4700<br>43 | 61 | 40.53% | 5.387<br>848 | Al84614<br>8 |
| 270672                          | 4348 | 62 | 38.59% | 4.0044<br>04 | 79 | 48.46% | 5.108<br>103 | Map3k1<br>5  |
| 72306                           | 3111 | 62 | 58.92% | 5.5966<br>4  | 34 | 36.90% | 3.072<br>565 | Zfp777       |
| 83924                           | 2996 | 62 | 27%    | 5.8114<br>65 | 22 | 17.76% | 2.064<br>443 | Gpr137b      |



|                              |      |    |        |              |    |        |              |                   |
|------------------------------|------|----|--------|--------------|----|--------|--------------|-------------------|
| 23885                        | 2967 | 62 | 48.77% | 5.8682<br>67 | 19 | 27.44% | 1.800<br>355 | Gmcl1             |
| 226118                       | 2767 | 62 | 55.91% | 6.2924<br>28 | 48 | 50.81% | 4.877<br>016 | Al60618<br>1      |
| gi 24497432 ref NM_153808.1  | 3432 | 62 | 51.75% | 5.0731<br>78 | 38 | 37.03% | 3.112<br>852 | -                 |
| gi 158508645 ref NM_144798.5 | 2132 | 62 | 58.91% | 8.1665<br>8  | 72 | 60.46% | 9.494<br>398 | -                 |
| 226548                       | 2851 | 62 | 26.69% | 6.1070<br>32 | 54 | 28.73% | 5.324<br>988 | Aph1a             |
| 74741                        | 4343 | 62 | 43.59% | 4.0090<br>14 | 46 | 33.09% | 2.977<br>763 | 5730419<br>I09Rik |
| 83408                        | 2145 | 62 | 31.79% | 8.1170<br>85 | 18 | 23.73% | 2.359<br>214 | Gimap3            |
| 216859                       | 2482 | 62 | 34.09% | 7.0149<br>67 | 37 | 31.27% | 4.191<br>042 | Acap1             |
| 654795                       | 1243 | 62 | 75.14% | 14.007<br>36 | 49 | 72.89% | 11.08<br>274 | Sdr39u1           |
| 26919                        | 3597 | 62 | 51.49% | 4.8404<br>64 | 29 | 29.19% | 2.266<br>625 | Zfp346            |
| 225849                       | 2708 | 62 | 61.96% | 6.4295<br>23 | 52 | 48.30% | 5.398<br>546 | Ppp2r5b           |
| 234371                       | 2994 | 62 | 55.54% | 5.8153<br>47 | 56 | 48.50% | 5.258<br>457 | Tmem16<br>1a      |
| 98376                        | 2509 | 62 | 67.68% | 6.9394<br>77 | 51 | 43.56% | 5.714<br>676 | Gorab             |
| 18247                        | 1861 | 62 | 46%    | 9.3558<br>02 | 60 | 43.47% | 9.064<br>148 | Oaz2              |
| 52575                        | 1846 | 62 | 73.35% | 9.4318<br>24 | 78 | 68.47% | 11.87<br>914 | Trmt10c           |
| 68304                        | 3644 | 62 | 45.86% | 4.7780<br>32 | 61 | 44.81% | 4.706<br>235 | Kdelc2            |
| 78777                        | 2784 | 62 | 58.69% | 6.2540<br>04 | 32 | 39.15% | 3.231<br>49  | Enthd2            |
| 76987                        | 2357 | 62 | 58.55% | 7.3869<br>95 | 38 | 38.06% | 4.532<br>587 | Hdhd2             |
| 235344                       | 3561 | 62 | 55.63% | 4.8893<br>98 | 49 | 39.60% | 3.868<br>532 | Sik2              |
| 67207                        | 2360 | 62 | 41.02% | 7.3776<br>05 | 58 | 39.41% | 6.909<br>365 | Lsm1              |
| 69186                        | 431  | 62 | 86.31% | 40.397<br>09 | 88 | 88.63% | 57.40<br>207 | 1810027<br>O10Rik |
| 71382                        | 4323 | 62 | 34.40% | 4.0275<br>61 | 41 | 34.14% | 2.666<br>372 | Pex1              |

|                                 |      |    |        |              |     |        |              |              |
|---------------------------------|------|----|--------|--------------|-----|--------|--------------|--------------|
| 51789                           | 4454 | 62 | 43.87% | 3.9091<br>04 | 56  | 41.24% | 3.534<br>76  | Tnk2         |
| 76357                           | 1669 | 62 | 85.20% | 10.432<br>08 | 72  | 80.95% | 12.12<br>825 | Trmt5        |
| 227707                          | 1345 | 62 | 69.14% | 12.945<br>09 | 66  | 66.84% | 13.79<br>57  | BC0056<br>24 |
| 381644                          | 5334 | 62 | 41.98% | 3.2641<br>82 | 28  | 21.26% | 1.475<br>799 | Cep135       |
| 20955                           | 2534 | 62 | 60.22% | 6.8710<br>13 | 59  | 57.18% | 6.545<br>872 | Vamp7        |
| 74201                           | 7904 | 62 | 29.14% | 2.2028<br>27 | 24  | 12.66% | 0.853<br>663 | Cep97        |
| gi 148540135 ref NM_001081059.2 | 1173 | 62 | 75.36% | 14.843<br>26 | 50  | 68.20% | 11.98<br>379 | -            |
| gi 146198565 ref NM_175112.4    | 1715 | 62 | 66.36% | 10.152<br>27 | 58  | 62.16% | 9.507<br>93  | -            |
| 69024                           | 1554 | 61 | 82.75% | 11.023<br>37 | 53  | 76.83% | 9.588<br>418 | Snx15        |
| 13803                           | 4752 | 61 | 44.28% | 3.6048<br>66 | 55  | 36.49% | 3.253<br>931 | Enc1         |
| 194655                          | 3982 | 61 | 50.58% | 4.3019<br>39 | 38  | 39.28% | 2.682<br>9   | Klf11        |
| 12578                           | 929  | 61 | 62.76% | 18.439<br>53 | 44  | 57.91% | 13.31<br>555 | Cdkn2a       |
| 72446                           | 4296 | 61 | 44.20% | 3.9875<br>05 | 88  | 50.77% | 5.758<br>913 | Prr51        |
| 16973                           | 5172 | 61 | 39.40% | 3.3121<br>27 | 112 | 60.83% | 6.088<br>098 | Lrp5         |
| 54396                           | 3537 | 61 | 48.66% | 4.8431<br>79 | 49  | 49.19% | 3.894<br>782 | Irgm2        |
| 66152                           | 444  | 61 | 93.69% | 38.581<br>81 | 82  | 92.34% | 51.92<br>219 | Uqcr10       |
| 76809                           | 7001 | 61 | 24.55% | 2.4468<br>39 | 45  | 21.07% | 1.807<br>068 | Bri3bp       |
| 30941                           | 2200 | 61 | 67.27% | 7.7865<br>1  | 45  | 56.68% | 5.750<br>584 | Usp21        |
| 232679                          | 1847 | 61 | 79.21% | 9.2746<br>74 | 72  | 78.56% | 10.95<br>942 | Zc3hc1       |
| gi 118130339 ref NM_178061.4    | 2382 | 61 | 64.23% | 7.1915<br>71 | 78  | 77.25% | 9.206<br>085 | -            |
| 192174                          | 2971 | 61 | 53.01% | 5.7658<br>44 | 87  | 53.75% | 8.232<br>632 | Rwdd4a       |
| 16068                           | 1422 | 61 | 79.82% | 12.046<br>64 | 60  | 70.96% | 11.86<br>243 | Il18bp       |

|                              |      |    |        |              |    |        |              |                   |
|------------------------------|------|----|--------|--------------|----|--------|--------------|-------------------|
| 112403                       | 1472 | 61 | 77.45% | 11.637<br>45 | 61 | 76.15% | 11.65<br>049 | Dom3z             |
| 22142                        | 1591 | 61 | 36.52% | 10.767<br>02 | 33 | 33.44% | 5.831<br>307 | Tuba1a            |
| 11778                        | 5823 | 61 | 36.77% | 2.9418<br>38 | 45 | 32.35% | 2.172<br>64  | Ap3s2             |
| 22351                        | 2915 | 61 | 61.51% | 5.8766<br>12 | 55 | 53.17% | 5.304<br>522 | Vill              |
| 70160                        | 1290 | 61 | 81.71% | 13.279<br>32 | 56 | 78.14% | 12.20<br>451 | Vps36             |
| 71910                        | 1486 | 61 | 70.26% | 11.527<br>81 | 41 | 64.47% | 7.756<br>882 | Ppapdc1<br>b      |
| 106052                       | 3479 | 61 | 30.44% | 4.9239<br>21 | 53 | 34.69% | 4.282<br>955 | Fbxo4             |
| 59049                        | 2294 | 61 | 53.23% | 7.4674<br>47 | 59 | 51.61% | 7.230<br>706 | Slc22a17          |
| 106068                       | 4659 | 61 | 44.47% | 3.6768<br>24 | 50 | 38.06% | 3.017<br>167 | Slc45a4           |
| 52686                        | 2619 | 61 | 61.17% | 6.5407<br>88 | 71 | 62.77% | 7.621<br>579 | Mettl2            |
| 13611                        | 2393 | 61 | 63.98% | 7.1585<br>13 | 28 | 36.19% | 3.289<br>557 | S1pr4             |
| gi 167900469 ref NM_013784.2 | 4060 | 61 | 45.17% | 4.2192<br>91 | 44 | 38.77% | 3.046<br>834 | -                 |
| gi 118131082 ref NM_007908.3 | 3079 | 61 | 57.97% | 5.5635<br>99 | 54 | 51.74% | 4.930<br>673 | -                 |
| 213012                       | 2127 | 61 | 66.85% | 8.0537<br>48 | 64 | 61.40% | 8.459<br>303 | Abhd10            |
| 319535                       | 5944 | 61 | 34.66% | 2.8819<br>52 | 39 | 23.08% | 1.844<br>624 | Zfp182            |
| 66548                        | 2402 | 61 | 61.87% | 7.1316<br>91 | 48 | 53.87% | 5.618<br>111 | Adamtsl<br>5      |
| 319876                       | 5042 | 61 | 38.04% | 3.3975<br>25 | 24 | 18.78% | 1.338<br>229 | Cobll1            |
| 69367                        | 3603 | 61 | 44.13% | 4.7544<br>61 | 59 | 29.70% | 4.603<br>73  | Glxr2             |
| 269623                       | 2344 | 61 | 61.26% | 7.3081<br>58 | 50 | 43.86% | 5.997<br>006 | C030048<br>B08Rik |
| 105835                       | 3013 | 61 | 53.07% | 5.6854<br>71 | 53 | 51.05% | 4.945<br>371 | Sgsm3             |
| 66880                        | 3232 | 61 | 55.20% | 5.3002<br>24 | 75 | 63.99% | 6.523<br>971 | Rsrc1             |
| 67459                        | 3060 | 61 | 59.35% | 5.5981<br>45 | 38 | 41.80% | 3.491<br>277 | Nvl               |

|        |      |    |        |              |     |        |              |         |
|--------|------|----|--------|--------------|-----|--------|--------------|---------|
| 72404  | 4135 | 61 | 51.05% | 4.1427<br>62 | 58  | 50.86% | 3.943<br>434 | Wdr44   |
| 244891 | 5259 | 61 | 38.43% | 3.2573<br>35 | 49  | 35.03% | 2.619<br>48  | Scaper  |
| 66901  | 2398 | 61 | 63.18% | 7.1435<br>87 | 141 | 90.95% | 16.53<br>073 | Proz    |
| 16881  | 3186 | 61 | 55.68% | 5.3767<br>49 | 51  | 46.96% | 4.500<br>352 | Lig1    |
| 14672  | 3262 | 61 | 56.01% | 5.2514<br>78 | 46  | 48.13% | 3.964<br>569 | Gna11   |
| 216169 | 1473 | 61 | 78.82% | 11.629<br>55 | 47  | 73.18% | 8.970<br>512 | Fam108a |
| 18685  | 3342 | 61 | 46.95% | 5.1257<br>7  | 58  | 44.73% | 4.879<br>144 | Phf1    |
| 66143  | 1039 | 61 | 79.40% | 16.487<br>32 | 64  | 89.22% | 17.31<br>755 | Eef1e1  |
| 30932  | 1665 | 61 | 56.70% | 10.288<br>48 | 58  | 56.04% | 9.793<br>454 | Zfp330  |
| 16169  | 1465 | 60 | 76.52% | 11.501<br>36 | 73  | 81.91% | 14.00<br>901 | Il15ra  |
| 208908 | 3920 | 60 | 44.16% | 4.2983<br>41 | 43  | 36.45% | 3.083<br>93  | Ccdc62  |
| 77590  | 4265 | 60 | 41.92% | 3.9506<br>44 | 22  | 23.05% | 1.450<br>193 | Chst15  |
| 51869  | 8502 | 60 | 27.25% | 1.9818<br>28 | 40  | 17.10% | 1.322<br>699 | Rif1    |
| 74241  | 3250 | 60 | 46.89% | 5.1844<br>61 | 41  | 38.25% | 3.546<br>685 | Chpf    |
| 666926 | 1374 | 60 | 63.97% | 12.263<br>1  | 32  | 49.93% | 6.547<br>649 | Gm8369  |
| 215208 | 4686 | 60 | 36.21% | 3.5957<br>1  | 38  | 29.77% | 2.279<br>835 | Gm4790  |
| 93747  | 1491 | 60 | 81.35% | 11.300<br>8  | 84  | 78.81% | 15.83<br>885 | Echs1   |
| 106794 | 5094 | 60 | 41.97% | 3.3077<br>15 | 41  | 27.42% | 2.262<br>804 | Dhx57   |
| 69672  | 1554 | 60 | 69.11% | 10.842<br>66 | 52  | 69.88% | 9.407<br>505 | Txndc15 |
| 69786  | 2241 | 60 | 65.42% | 7.5187<br>41 | 60  | 69.17% | 7.527<br>166 | Tprkb   |
| 234865 | 5808 | 60 | 34.37% | 2.9010<br>84 | 35  | 18.53% | 1.694<br>196 | Nup133  |
| 59031  | 1802 | 60 | 76.36% | 9.3504<br>43 | 48  | 72.14% | 7.488<br>737 | Chst12  |

|                                     |      |    |        |              |     |        |              |              |
|-------------------------------------|------|----|--------|--------------|-----|--------|--------------|--------------|
| 17218                               | 3422 | 60 | 51.17% | 4.9238<br>74 | 50  | 43.16% | 4.107<br>827 | Mcm5         |
| 24074                               | 3302 | 60 | 34.98% | 5.1028<br>16 | 58  | 41.58% | 4.938<br>25  | Taf7         |
| gi 149262309 ref X<br>M_001478311.1 | 2471 | 60 | 52.29% | 6.8188<br>98 | 72  | 45.61% | 8.191<br>848 | -            |
| 75540                               | 3526 | 60 | 56.24% | 4.7786<br>44 | 49  | 39.51% | 3.906<br>932 | Fpgt         |
| 69537                               | 1635 | 60 | 71.50% | 10.305<br>5  | 98  | 86.91% | 16.85<br>118 | Dnase111     |
| 81840                               | 5722 | 60 | 36.51% | 2.9446<br>87 | 130 | 54.40% | 6.387<br>304 | Sorcs2       |
| gi 270483845 ref N<br>M_019988.4    | 3377 | 60 | 52.47% | 4.9894<br>87 | 36  | 33.52% | 2.997<br>047 | -            |
| 224143                              | 2641 | 60 | 57.06% | 6.3799<br>69 | 51  | 52.22% | 5.429<br>051 | Poglut1      |
| gi 14192944 ref N<br>M_032418.1     | 1896 | 60 | 67.56% | 8.8868<br>66 | 60  | 70.41% | 8.896<br>825 | -            |
| 227700                              | 1740 | 60 | 73.97% | 9.6836<br>19 | 53  | 73.33% | 8.563<br>449 | Sh3glb2      |
| 27632                               | 1621 | 60 | 75.14% | 10.394<br>51 | 59  | 75.94% | 10.23<br>272 | Rdbp         |
| 66614                               | 1768 | 60 | 65.55% | 9.5302<br>59 | 55  | 65.72% | 8.745<br>861 | Gpatch4      |
| 108067                              | 3754 | 60 | 30.18% | 4.4884<br>12 | 35  | 25.01% | 2.621<br>174 | Eif2b3       |
| 347722                              | 9581 | 60 | 22.97% | 1.7586<br>37 | 60  | 23.73% | 1.760<br>607 | Agap1        |
| gi 167621457 ref N<br>M_009665.4    | 3203 | 60 | 14.30% | 5.2605<br>36 | 61  | 17.30% | 5.354<br>205 | -            |
| 210376                              | 2457 | 60 | 61.66% | 6.8577<br>52 | 51  | 57.18% | 5.835<br>622 | Mtmr9        |
| 16192                               | 3557 | 60 | 47.85% | 4.7369<br>97 | 57  | 41.50% | 4.505<br>19  | Il5ra        |
| 72023                               | 4210 | 60 | 50.67% | 4.0022<br>56 | 34  | 30.38% | 2.270<br>487 | Cyb561d<br>1 |
| 226422                              | 1212 | 60 | 84.98% | 13.902<br>23 | 38  | 72.85% | 8.814<br>61  | Rab711       |
| 67044                               | 613  | 60 | 89.07% | 27.486<br>95 | 65  | 87.77% | 29.81<br>089 | Higd2a       |
| 17122                               | 1194 | 60 | 78.89% | 14.111<br>81 | 45  | 66.92% | 10.59<br>572 | Mxd4         |
| 24127                               | 5515 | 60 | 39.31% | 3.0552<br>13 | 26  | 20.78% | 1.325<br>409 | Xrn1         |

|                              |      |    |        |              |    |        |              |                   |
|------------------------------|------|----|--------|--------------|----|--------|--------------|-------------------|
| 76594                        | 5169 | 60 | 40.92% | 3.2597<br>21 | 56 | 39.54% | 3.045<br>816 | Dnajt18           |
| 75616                        | 1864 | 60 | 60.25% | 9.0394<br>3  | 49 | 61.70% | 7.390<br>474 | 2810008<br>M24Rik |
| 54151                        | 1587 | 60 | 68.56% | 10.617<br>2  | 61 | 67.42% | 10.80<br>625 | Cyhr1             |
| 17120                        | 2640 | 60 | 60.15% | 6.3823<br>86 | 84 | 68.94% | 8.945<br>353 | Mad111            |
| 20441                        | 2568 | 60 | 53.89% | 6.5613<br>31 | 66 | 55.57% | 7.225<br>552 | St3gal3           |
| 68556                        | 1811 | 59 | 76.31% | 9.1489<br>08 | 36 | 57.65% | 5.588<br>64  | Uck11             |
| 20922                        | 693  | 59 | 54.11% | 23.908<br>62 | 48 | 55.84% | 19.47<br>288 | Supt4h1           |
| 15312                        | 1200 | 59 | 47.25% | 13.807<br>23 | 50 | 38.67% | 11.71<br>415 | Hmgn1             |
| 11640                        | 3758 | 59 | 48.30% | 4.4089<br>07 | 41 | 39.33% | 3.067<br>25  | Akap1             |
| 73068                        | 3344 | 59 | 57.48% | 4.9547<br>47 | 50 | 37.44% | 4.203<br>643 | Fut11             |
| 81909                        | 1235 | 59 | 90.45% | 13.415<br>93 | 34 | 67.94% | 7.739<br>877 | Zfp11             |
| 68273                        | 2736 | 59 | 62.13% | 6.0558<br>01 | 30 | 40.64% | 3.082<br>672 | Pomgnt1           |
| 114674                       | 3468 | 59 | 50.32% | 4.7775<br>87 | 57 | 45.73% | 4.620<br>808 | Gtf2ird2          |
| 73998                        | 4742 | 59 | 42.07% | 3.4940<br>26 | 32 | 26.55% | 1.897<br>189 | Herc3             |
| 17454                        | 3639 | 59 | 50.59% | 4.5530<br>84 | 47 | 38.72% | 3.631<br>098 | Mov10             |
| 11535                        | 1381 | 59 | 75.16% | 11.997<br>59 | 50 | 76.18% | 10.17<br>884 | Adm               |
| 72722                        | 2817 | 59 | 55.17% | 5.8816<br>73 | 42 | 43.38% | 4.191<br>646 | Fam98a            |
| gi 142387942 ref NM_153585.4 | 2853 | 59 | 55.66% | 5.8074<br>56 | 51 | 52.51% | 5.025<br>63  | -                 |
| 26457                        | 2795 | 59 | 54.60% | 5.9279<br>69 | 31 | 39.11% | 3.118<br>186 | Slc27a1           |
| 19046                        | 4024 | 59 | 11.03% | 4.1174<br>63 | 55 | 11.16% | 3.842<br>615 | Ppp1cb            |
| gi 146149297 ref NM_053182.4 | 3729 | 59 | 51.84% | 4.4431<br>95 | 71 | 58.68% | 5.352<br>887 | -                 |
| 215798                       | 6505 | 59 | 31.96% | 2.5470<br>67 | 84 | 38.89% | 3.630<br>397 | Gpr126            |

|                                 |      |    |        |              |    |        |              |                   |
|---------------------------------|------|----|--------|--------------|----|--------|--------------|-------------------|
| 381287                          | 1760 | 59 | 52.05% | 9.4140<br>19 | 27 | 26.70% | 4.312<br>938 | A530032<br>D15Rik |
| 93834                           | 5849 | 59 | 35.39% | 2.8327<br>36 | 67 | 38.72% | 3.220<br>441 | Peli2             |
| 170763                          | 2710 | 59 | 65.09% | 6.1139<br>01 | 35 | 40.04% | 3.630<br>955 | Zfp87             |
| 22724                           | 3704 | 59 | 38.90% | 4.4731<br>84 | 44 | 32.80% | 3.339<br>672 | Zbtb7b            |
| 216151                          | 3762 | 59 | 49.02% | 4.4042<br>19 | 36 | 32.27% | 2.690<br>332 | Polrmt            |
| 231801                          | 2409 | 59 | 67.21% | 6.8778<br>22 | 47 | 55.71% | 5.485<br>083 | Agfg2             |
| 399510                          | 4490 | 59 | 43.50% | 3.6901<br>28 | 54 | 39.87% | 3.381<br>19  | Map4k5            |
| 70422                           | 5922 | 59 | 32.64% | 2.7978<br>17 | 46 | 24.77% | 2.183<br>793 | Ints2             |
| gi 23956211 ref N<br>M_028242.1 | 2833 | 59 | 60.25% | 5.8484<br>55 | 57 | 54.15% | 5.656<br>534 | -                 |
| gi 85719319 ref N<br>M_029880.2 | 3086 | 59 | 54.89% | 5.3689<br>8  | 69 | 65.46% | 6.286<br>013 | -                 |
| 75619                           | 3205 | 59 | 44.46% | 5.1696<br>33 | 43 | 40.16% | 3.771<br>921 | Fastkd2           |
| 71398                           | 3835 | 59 | 35.75% | 4.3203<br>84 | 54 | 37.94% | 3.958<br>681 | 5430427<br>O19Rik |
| 12568                           | 2058 | 59 | 55.98% | 8.0508<br>61 | 54 | 45.72% | 7.376<br>842 | Cdk5              |
| 1E+08                           | 4825 | 59 | 15.27% | 3.4339<br>22 | 59 | 16.77% | 3.437<br>77  | Gm4635            |
| 24067                           | 4264 | 59 | 24.53% | 3.8857<br>11 | 55 | 24.23% | 3.626<br>332 | Srp54a            |
| 22619                           | 3433 | 59 | 52.08% | 4.8262<br>96 | 56 | 52.64% | 4.586<br>024 | Siae              |
| 208727                          | 3960 | 59 | 54.97% | 4.1840<br>08 | 30 | 29.52% | 2.129<br>846 | Hdac4             |
| 20361                           | 3290 | 59 | 59.70% | 5.0360<br>71 | 52 | 46.81% | 4.443<br>545 | Sema7a            |
| 1E+08                           | 5976 | 59 | 12.25% | 2.7725<br>36 | 59 | 13.44% | 2.775<br>643 | Gm1062<br>1       |
| 630499                          | 1324 | 59 | 69.34% | 12.514<br>1  | 31 | 51.36% | 6.582<br>575 | H2-K2             |
| 66047                           | 587  | 59 | 93.70% | 28.226<br>02 | 68 | 86.54% | 32.56<br>814 | Mrpl54            |
| 66467                           | 1191 | 59 | 64.06% | 13.911<br>56 | 85 | 68.01% | 20.06<br>454 | Gtf2h5            |

|                              |      |    |        |              |     |        |              |                   |
|------------------------------|------|----|--------|--------------|-----|--------|--------------|-------------------|
| 224674                       | 2942 | 59 | 57.58% | 5.6317<br>72 | 44  | 46.46% | 4.204<br>672 | Slc37a1           |
| 236193                       | 3990 | 59 | 48.72% | 4.1525<br>5  | 24  | 25.01% | 1.691<br>066 | Zfp709            |
| 12981                        | 1033 | 59 | 59.44% | 16.039<br>37 | 319 | 70.76% | 86.81<br>854 | Csf2              |
| 53607                        | 1382 | 59 | 63.97% | 11.988<br>91 | 53  | 70.77% | 10.78<br>177 | Snrpa             |
| 53375                        | 1258 | 59 | 71.86% | 13.170<br>65 | 64  | 77.11% | 14.30<br>281 | Mtx2              |
| 245866                       | 2124 | 59 | 74.06% | 7.8006<br>93 | 44  | 58%    | 5.823<br>985 | Ift52             |
| 68058                        | 2989 | 59 | 59.79% | 5.5432<br>16 | 44  | 50.55% | 4.138<br>556 | Chd11             |
| 69663                        | 4874 | 59 | 42.74% | 3.3993<br>99 | 45  | 32.09% | 2.595<br>668 | Ddx51             |
| gi 158508440 ref NM_028379.4 | 1332 | 59 | 85.51% | 12.438<br>94 | 52  | 78.38% | 10.97<br>542 | -                 |
| 71538                        | 2172 | 59 | 64.64% | 7.6283<br>02 | 45  | 65.19% | 5.824<br>717 | Fbxo9             |
| 192156                       | 1864 | 58 | 67.01% | 8.7381<br>16 | 56  | 70.98% | 8.446<br>256 | Mvd               |
| 22021                        | 1937 | 58 | 66.96% | 8.4088<br>01 | 57  | 63.55% | 8.273<br>082 | Tpst1             |
| 52323                        | 3427 | 58 | 45.11% | 4.7528<br>01 | 74  | 51.94% | 6.070<br>713 | Klhl7             |
| 233060                       | 2193 | 58 | 63.43% | 7.4271<br>99 | 38  | 54.58% | 4.871<br>549 | Zfp382            |
| 67291                        | 2760 | 58 | 57.93% | 5.9013<br>94 | 35  | 43.01% | 3.565<br>177 | Ccdc137           |
| 67609                        | 1331 | 58 | 61.98% | 12.237<br>3  | 55  | 60.03% | 11.61<br>734 | 4930453<br>N24Rik |
| 1E+08                        | 2318 | 58 | 16.52% | 7.0266<br>82 | 51  | 23.90% | 6.185<br>558 | Gm3770            |
| 14991                        | 1425 | 58 | 78.25% | 11.430<br>07 | 34  | 60.49% | 6.707<br>894 | H2-M3             |
| gi 142373774 ref NM_023217.3 | 2150 | 58 | 66.19% | 7.5757<br>43 | 55  | 66.74% | 7.191<br>945 | -                 |
| gi 58037172 ref NM_027186.1  | 1093 | 58 | 82.07% | 14.901<br>97 | 46  | 67.52% | 11.83<br>204 | -                 |
| 13482                        | 5268 | 58 | 33.05% | 3.0918<br>47 | 28  | 18.89% | 1.494<br>288 | Dpp4              |
| 14235                        | 4391 | 58 | 45.18% | 3.7093<br>71 | 55  | 43.29% | 3.521<br>449 | Foxm1             |



|                                     |      |    |        |              |     |        |              |                   |
|-------------------------------------|------|----|--------|--------------|-----|--------|--------------|-------------------|
| 107515                              | 5066 | 58 | 40.13% | 3.2151<br>3  | 73  | 45.68% | 4.051<br>164 | Lgr4              |
| 76784                               | 2748 | 58 | 62.23% | 5.9271<br>64 | 45  | 52.51% | 4.603<br>815 | Mtif2             |
| 67144                               | 4092 | 58 | 40.25% | 3.9804<br>12 | 44  | 32.60% | 3.023<br>007 | Lrrc40            |
| gi 149255604 ref X<br>M_001477170.1 | 711  | 58 | 81.43% | 22.908<br>37 | 23  | 60.34% | 9.094<br>532 | -                 |
| 67296                               | 2154 | 58 | 67.69% | 7.5616<br>75 | 31  | 43.55% | 4.046<br>114 | Socs4             |
| 18791                               | 2548 | 58 | 59.50% | 6.3924<br>05 | 130 | 82.57% | 14.34<br>386 | Plat              |
| 53415                               | 1482 | 58 | 77.06% | 10.990<br>45 | 55  | 74.22% | 10.43<br>366 | Htatip2           |
| 235169                              | 2177 | 58 | 62.33% | 7.4817<br>86 | 33  | 49.84% | 4.261<br>649 | Foxred1           |
| 69906                               | 2945 | 58 | 48.69% | 5.5306<br>78 | 60  | 52.16% | 5.727<br>803 | Slc25a32          |
| 241576                              | 3827 | 58 | 51.66% | 4.2560<br>35 | 89  | 55.68% | 6.538<br>132 | Ldlrad3           |
| 12934                               | 4451 | 58 | 40.24% | 3.6593<br>68 | 65  | 42.84% | 4.105<br>612 | Dpysl2            |
| 107375                              | 1833 | 58 | 73%    | 8.8858<br>96 | 43  | 55.43% | 6.595<br>202 | Slc25a45          |
| 15953                               | 1681 | 58 | 65.56% | 9.6893<br>8  | 34  | 58.95% | 5.686<br>347 | Ifi47             |
| 70701                               | 4205 | 58 | 45.11% | 3.8734<br>48 | 73  | 51.94% | 4.880<br>665 | Nipal1            |
| 381511                              | 4233 | 58 | 41.39% | 3.8478<br>26 | 51  | 31.47% | 3.387<br>225 | Pdp1              |
| 104662                              | 3395 | 58 | 42.65% | 4.7975<br>99 | 45  | 32.93% | 3.726<br>446 | Tsr1              |
| 69527                               | 1445 | 58 | 79.79% | 11.271<br>87 | 62  | 77.09% | 12.06<br>274 | Mrps9             |
| 22697                               | 2321 | 58 | 59.37% | 7.0175<br>99 | 26  | 39.38% | 3.149<br>346 | Zscan21           |
| 70153                               | 2822 | 58 | 52.69% | 5.7717<br>39 | 53  | 45.50% | 5.280<br>086 | 2210016<br>F16Rik |
| 277463                              | 3926 | 58 | 32.20% | 4.1487<br>13 | 35  | 24.58% | 2.506<br>339 | Gpr107            |
| gi 30795234 ref N<br>M_178309.1     | 6934 | 58 | 20.52% | 2.3489<br>83 | 53  | 16.07% | 2.148<br>89  | -                 |
| 30795                               | 945  | 58 | 68.68% | 17.235<br>82 | 62  | 63.70% | 18.44<br>514 | Fkbp3             |

|                                     |      |    |        |              |    |        |              |                   |
|-------------------------------------|------|----|--------|--------------|----|--------|--------------|-------------------|
| 216156                              | 2954 | 58 | 52.64% | 5.5138<br>28 | 44 | 46.75% | 4.187<br>591 | Wdr18             |
| 76051                               | 4818 | 58 | 37.67% | 3.3806<br>24 | 39 | 27.60% | 2.275<br>726 | Ganc              |
| 27966                               | 1537 | 58 | 75.15% | 10.597<br>17 | 58 | 80.42% | 10.60<br>904 | Rrp9              |
| 76932                               | 3277 | 58 | 48.49% | 4.9703<br>53 | 49 | 50.08% | 4.203<br>797 | Arfp2             |
| 50505                               | 6703 | 58 | 27.73% | 2.4299<br>34 | 49 | 27.21% | 2.055<br>176 | Ercc4             |
| 330319                              | 4204 | 58 | 45.50% | 3.8743<br>69 | 18 | 17.32% | 1.203<br>738 | Wipf3             |
| 71449                               | 2801 | 58 | 61.73% | 5.8150<br>12 | 38 | 44.81% | 3.814<br>105 | Mettl13           |
| 380969                              | 4871 | 58 | 38.39% | 3.3438<br>41 | 46 | 32.54% | 2.654<br>983 | Nckap5l           |
| 67136                               | 2393 | 58 | 64.10% | 6.8064<br>55 | 37 | 46.18% | 4.346<br>915 | Kbtbd4            |
| 12477                               | 1931 | 58 | 80.84% | 8.4349<br>29 | 30 | 51.06% | 4.367<br>783 | Ctla4             |
| 229007                              | 2289 | 58 | 60.51% | 7.1157<br>05 | 42 | 51.07% | 5.158<br>526 | Zgpat             |
| gi 149253626 ref X<br>M_001478223.1 | 965  | 58 | 36.89% | 16.878<br>6  | 49 | 37.51% | 14.27<br>549 | -                 |
| 69136                               | 1364 | 57 | 69.87% | 11.735<br>35 | 41 | 54.25% | 8.450<br>679 | Tusc1             |
| 226751                              | 8656 | 57 | 25.14% | 1.8492<br>4  | 48 | 23.42% | 1.559        | Cdc42bp<br>a      |
| 66464                               | 1353 | 57 | 73.84% | 11.830<br>76 | 56 | 77.46% | 11.63<br>623 | Taf12             |
| 66812                               | 2767 | 57 | 43.98% | 5.7849<br>74 | 35 | 33.07% | 3.556<br>158 | Ppcdc             |
| 26465                               | 2045 | 57 | 42.54% | 7.8273<br>95 | 45 | 39.51% | 6.186<br>447 | Zfp146            |
| 69554                               | 1946 | 57 | 66.60% | 8.2256<br>03 | 39 | 50.98% | 5.634<br>351 | Klhdc2            |
| 382090                              | 5295 | 57 | 39.83% | 3.0230<br>45 | 34 | 24.32% | 1.805<br>241 | 4922501<br>C03Rik |
| 67037                               | 992  | 57 | 86.79% | 16.136<br>11 | 58 | 94.96% | 16.43<br>76  | Pmf1              |
| gi 149262691 ref X<br>M_001475576.1 | 2543 | 57 | 10.22% | 6.2945<br>43 | 86 | 8.30%  | 9.507<br>672 | -                 |
| 110524                              | 4612 | 57 | 40.76% | 3.4707<br>33 | 47 | 33.52% | 2.865<br>04  | Dgkq              |

|                                     |      |    |        |              |    |        |              |                   |
|-------------------------------------|------|----|--------|--------------|----|--------|--------------|-------------------|
| gi 149255614 ref X<br>M_001477552.1 | 480  | 57 | 75.83% | 33.347<br>96 | 18 | 59.79% | 10.54<br>274 | -                 |
| 77595                               | 5681 | 57 | 35.54% | 2.8176<br>42 | 65 | 40.57% | 3.216<br>701 | Nup210l           |
| 664919                              | 2756 | 57 | 13.72% | 5.8080<br>63 | 70 | 17.42% | 7.140<br>703 | Gm7406            |
| 71952                               | 2346 | 57 | 57.89% | 6.8231<br>13 | 41 | 54.26% | 4.913<br>353 | 2410016<br>O06Rik |
| 11655                               | 2702 | 57 | 22.95% | 5.9241<br>39 | 64 | 23.32% | 6.659<br>119 | Alas1             |
| 22401                               | 7784 | 57 | 26.46% | 2.0564<br>01 | 34 | 18.72% | 1.228        | Zmat3             |
| 64436                               | 4155 | 57 | 41.64% | 3.8524<br>72 | 54 | 34.58% | 3.653<br>801 | Inpp5e            |
| 21781                               | 1700 | 57 | 64.47% | 9.4158<br>96 | 54 | 62.12% | 8.930<br>319 | Tfdp1             |
| 108156                              | 3324 | 57 | 44.46% | 4.8155<br>91 | 49 | 48.65% | 4.144<br>357 | Mthfd1            |
| 94218                               | 5340 | 57 | 34.48% | 2.9975<br>7  | 30 | 22.73% | 1.579<br>436 | Cnm3              |
| gi 118442835 ref N<br>M_011663.2    | 2880 | 57 | 49.55% | 5.5579<br>94 | 36 | 35.45% | 3.514<br>246 | -                 |
| 50935                               | 2457 | 57 | 61.17% | 6.5148<br>65 | 41 | 46.03% | 4.691<br>382 | St6galna<br>c6    |
| 234967                              | 1937 | 57 | 73.31% | 8.2638<br>22 | 26 | 39.39% | 3.773<br>687 | Slc36a4           |
| 319236                              | 3736 | 57 | 33.99% | 4.2845<br>35 | 50 | 32.39% | 3.762<br>576 | Trim12c           |
| 234344                              | 2990 | 57 | 43.61% | 5.3535<br>19 | 58 | 52.94% | 5.453<br>545 | Naf1              |
| 1.01E+08                            | 3314 | 57 | 36.54% | 4.8301<br>22 | 49 | 40.16% | 4.156<br>863 | Dos               |
| 66616                               | 2078 | 57 | 12.99% | 7.7030<br>91 | 53 | 13.72% | 7.170<br>55  | Snx9              |
| 227327                              | 2608 | 57 | 53.22% | 6.1376<br>62 | 34 | 45.28% | 3.665<br>164 | B3gnt7            |
| 227715                              | 1635 | 57 | 78.84% | 9.7902<br>28 | 35 | 60.67% | 6.018<br>28  | Exosc2            |
| 13496                               | 5326 | 57 | 39%    | 3.0054<br>49 | 48 | 33.57% | 2.533<br>741 | Arid3a            |
| 70155                               | 4844 | 57 | 34.31% | 3.3045<br>05 | 90 | 50.39% | 5.223<br>487 | Ogfr1l            |
| 269642                              | 6529 | 57 | 33.02% | 2.4516<br>81 | 52 | 27.94% | 2.239<br>127 | Nat8l             |

|        |      |    |        |              |    |        |              |                   |
|--------|------|----|--------|--------------|----|--------|--------------|-------------------|
| 13559  | 1763 | 57 | 64.44% | 9.0794<br>23 | 49 | 57.18% | 7.813<br>865 | E2f5              |
| 76568  | 3337 | 57 | 37.91% | 4.7968<br>3  | 43 | 37.07% | 3.622<br>717 | Ift46             |
| 16413  | 1874 | 57 | 54.80% | 8.5416<br>34 | 59 | 54.64% | 8.851<br>249 | Itgb1bp1          |
| 276905 | 2249 | 57 | 67.36% | 7.1173<br>96 | 56 | 65.10% | 7.000<br>365 | Armc7             |
| 223666 | 4587 | 57 | 42.56% | 3.4896<br>5  | 72 | 49.29% | 4.412<br>918 | Arhgap3<br>9      |
| 264895 | 3069 | 57 | 42.13% | 5.2157<br>13 | 36 | 29.85% | 3.297<br>826 | Acsf2             |
| 71116  | 1562 | 57 | 71.57% | 10.247<br>77 | 62 | 71.83% | 11.15<br>919 | Stx18             |
| 212276 | 4602 | 57 | 42.96% | 3.4782<br>75 | 51 | 36.81% | 3.115<br>629 | Zfp748            |
| 18260  | 3192 | 57 | 48.84% | 5.0147<br>31 | 90 | 57.74% | 7.926<br>87  | Ocln              |
| 243382 | 5560 | 57 | 35.90% | 2.8789<br>61 | 37 | 24.35% | 1.870<br>893 | Ppm1k             |
| 20359  | 3847 | 57 | 51.36% | 4.1609<br>11 | 53 | 45.39% | 3.873<br>252 | Sema6b            |
| 55978  | 802  | 57 | 94.51% | 19.958<br>88 | 45 | 75.19% | 15.77<br>467 | Ift20             |
| 13612  | 5358 | 56 | 34.15% | 2.9350<br>87 | 47 | 30.85% | 2.466<br>137 | Edil3             |
| 11477  | 3312 | 56 | 47.89% | 4.7482<br>48 | 58 | 47.37% | 4.923<br>339 | Acvr1             |
| 217837 | 2856 | 56 | 63.55% | 5.5063<br>72 | 50 | 54.73% | 4.921<br>913 | Itpk1             |
| 30843  | 2098 | 56 | 65.87% | 7.4958<br>05 | 58 | 58.72% | 7.772<br>212 | Fbxl12            |
| 93696  | 851  | 56 | 84.14% | 18.479<br>67 | 71 | 90.60% | 23.45<br>584 | Chrac1            |
| 77041  | 3657 | 56 | 36.07% | 4.3003       | 48 | 31.28% | 3.690<br>102 | Arsk              |
| 56703  | 4261 | 56 | 39.87% | 3.6907<br>29 | 33 | 28.94% | 2.177<br>331 | Pigo              |
| 26874  | 5540 | 56 | 30.78% | 2.8386<br>64 | 56 | 30.67% | 2.841<br>845 | Abcd2             |
| 212073 | 5436 | 56 | 36.74% | 2.8929<br>72 | 50 | 35.26% | 2.585<br>906 | 4831426<br>I19Rik |
| 194590 | 7630 | 56 | 28.51% | 2.0611<br>01 | 38 | 17.90% | 1.400<br>171 | Reps2             |

|                              |      |    |        |              |    |        |              |                   |
|------------------------------|------|----|--------|--------------|----|--------|--------------|-------------------|
| 545085                       | 2151 | 56 | 63.74% | 7.3111<br>1  | 64 | 66.85% | 8.364<br>918 | Wdr70             |
| 13929                        | 2816 | 56 | 49.50% | 5.5845<br>87 | 64 | 51.67% | 6.389<br>538 | Amz2              |
| 67031                        | 1402 | 56 | 74.89% | 11.216<br>97 | 70 | 88.30% | 14.03<br>693 | Upf3a             |
| 76501                        | 1175 | 56 | 84.17% | 13.384       | 77 | 88.51% | 18.42<br>362 | Commd9            |
| 54380                        | 6715 | 56 | 28.53% | 2.3419<br>51 | 40 | 21.73% | 1.674<br>696 | Smarcal1          |
| 14194                        | 1644 | 56 | 68.61% | 9.5658<br>14 | 74 | 71.96% | 12.65<br>47  | Fh1               |
| 107508                       | 4850 | 56 | 10.89% | 3.2425<br>15 | 39 | 7.05%  | 2.260<br>711 | Eprs              |
| 18709                        | 3159 | 56 | 49.45% | 4.9782<br>2  | 41 | 42.17% | 3.648<br>853 | Pik3r2            |
| 20612                        | 6427 | 56 | 34.34% | 2.4468<br>96 | 43 | 22.28% | 1.880<br>972 | Siglec1           |
| 15507                        | 913  | 56 | 83.35% | 17.224<br>75 | 42 | 77.66% | 12.93<br>304 | Hspb1             |
| 30925                        | 2443 | 56 | 58.53% | 6.4372<br>48 | 25 | 33.73% | 2.876<br>992 | Slamf6            |
| 69757                        | 2213 | 56 | 54.23% | 7.1062<br>8  | 61 | 53.37% | 7.749<br>444 | Leng1             |
| 67226                        | 3010 | 56 | 59.63% | 5.2246<br>5  | 70 | 57.38% | 6.538<br>132 | Tmem19            |
| 12368                        | 1455 | 56 | 72.65% | 10.808<br>38 | 35 | 59.93% | 6.762<br>81  | Casp6             |
| 15001                        | 1064 | 56 | 81.02% | 14.780<br>26 | 37 | 70.49% | 9.776<br>473 | H2-Oa             |
| 68995                        | 876  | 56 | 76.60% | 17.952<br>28 | 46 | 87.44% | 14.76<br>304 | Mcts1             |
| 66942                        | 2249 | 56 | 40.86% | 6.9925<br>29 | 38 | 27.83% | 4.750<br>248 | Ddx18             |
| gi 254939581 ref NM_029624.3 | 1758 | 56 | 67.92% | 8.9455<br>05 | 55 | 77.76% | 8.795<br>609 | -                 |
| 74245                        | 2629 | 56 | 46.18% | 5.9818<br>17 | 61 | 57.21% | 6.523<br>21  | Ctbs              |
| 71745                        | 4158 | 56 | 40.02% | 3.7821<br>54 | 40 | 32.08% | 2.704<br>566 | Cul2              |
| 626058                       | 2827 | 56 | 60.74% | 5.5628<br>57 | 43 | 45.56% | 4.276<br>267 | E330020<br>D12Rik |
| 11982                        | 5469 | 56 | 37.72% | 2.8755<br>16 | 53 | 33.64% | 2.724<br>52  | Atp10a            |

|        |      |    |        |              |    |        |              |                   |
|--------|------|----|--------|--------------|----|--------|--------------|-------------------|
| 30840  | 1750 | 56 | 81.83% | 8.9863<br>99 | 62 | 72.29% | 9.960<br>377 | Fbx16             |
| 66857  | 1974 | 56 | 37.18% | 7.9666<br>66 | 43 | 32.17% | 6.124<br>116 | Plbd1             |
| 19763  | 2048 | 56 | 57.23% | 7.6788<br>08 | 37 | 51.12% | 5.079<br>183 | Ring1             |
| 100177 | 4134 | 56 | 37.86% | 3.8041<br>12 | 30 | 29.37% | 2.040<br>201 | Zmym6             |
| 68133  | 1337 | 56 | 51.61% | 11.762<br>3  | 53 | 59.54% | 11.14<br>465 | Gesh              |
| 171508 | 2078 | 56 | 66.07% | 7.5679<br>49 | 65 | 74.25% | 8.794<br>07  | Credl1            |
| 76539  | 2035 | 56 | 49.34% | 7.7278<br>61 | 43 | 45.75% | 5.940<br>543 | D19Ert<br>737e    |
| 15259  | 7497 | 56 | 11.90% | 2.0976<br>65 | 27 | 8.79%  | 1.012<br>508 | Hipk3             |
| 66569  | 2484 | 56 | 52.82% | 6.3309<br>98 | 45 | 48.59% | 5.093<br>11  | Gdpd1             |
| 69940  | 3395 | 56 | 23.95% | 4.6321<br>64 | 36 | 18.73% | 2.981<br>157 | Exoc1             |
| 69038  | 457  | 56 | 78.56% | 34.411<br>81 | 66 | 79.87% | 40.60<br>223 | 1810006<br>K21Rik |
| 76582  | 4282 | 56 | 38.23% | 3.6726<br>29 | 45 | 36.71% | 2.954<br>527 | Ipo11             |
| 50773  | 820  | 56 | 83.17% | 19.178<br>29 | 45 | 77.93% | 15.42<br>84  | Nt5c              |
| 1E+08  | 3774 | 56 | 6.15%  | 4.1669<br>84 | 63 | 8.93%  | 4.693<br>11  | Gm4108            |
| 26363  | 1956 | 56 | 74.90% | 8.0399<br>78 | 63 | 74.28% | 9.055<br>112 | Btd               |
| 210582 | 2507 | 56 | 41.80% | 6.2729<br>15 | 41 | 40.33% | 4.597<br>817 | Coq10a            |
| 20104  | 1394 | 56 | 30.92% | 11.281<br>35 | 49 | 31.35% | 9.882<br>241 | Rps6              |
| 18971  | 3428 | 55 | 51.28% | 4.5056<br>51 | 30 | 34.92% | 2.460<br>382 | Pold1             |
| 14312  | 4520 | 55 | 7.50%  | 3.4171<br>18 | 31 | 7.06%  | 1.928<br>17  | Brd2              |
| 13034  | 2120 | 55 | 67.59% | 7.2855<br>53 | 49 | 61.23% | 6.498<br>039 | Ctse              |
| 67893  | 1791 | 55 | 59.97% | 8.6238<br>82 | 48 | 61.53% | 7.534<br>731 | Tmem86<br>a       |
| 68818  | 1240 | 55 | 77.74% | 12.455<br>95 | 49 | 80.32% | 11.10<br>955 | Zfand2b           |

|                                  |      |    |        |              |    |        |              |             |
|----------------------------------|------|----|--------|--------------|----|--------|--------------|-------------|
| 70544                            | 971  | 55 | 90.94% | 15.906<br>67 | 65 | 89.08% | 18.81<br>985 | Tmem24<br>2 |
| 58205                            | 3415 | 55 | 52.47% | 4.5228<br>03 | 40 | 40.03% | 3.292<br>997 | Pdcd11g2    |
| 21761                            | 2013 | 55 | 18.13% | 7.6728<br>13 | 55 | 18.33% | 7.681<br>412 | Morf411     |
| 67151                            | 2610 | 55 | 49.77% | 5.9177<br>67 | 53 | 58.39% | 5.708<br>966 | Psm9        |
| 22122                            | 1329 | 55 | 76%    | 11.621<br>8  | 64 | 89.77% | 13.53<br>87  | Tsta3       |
| 245007                           | 4091 | 55 | 43.29% | 3.7754<br>52 | 19 | 22.07% | 1.305<br>709 | Zbtb38      |
| 15366                            | 3914 | 55 | 20.44% | 3.9461<br>86 | 53 | 22.20% | 3.806<br>95  | Hmmr        |
| 236732                           | 3715 | 55 | 34.21% | 4.1575<br>7  | 40 | 32.52% | 3.027<br>076 | Rbm10       |
| gi 40254592 ref N<br>M_009954.2  | 3169 | 55 | 54.18% | 4.8738<br>95 | 56 | 51.50% | 4.968<br>072 | -           |
| 54135                            | 2177 | 55 | 58.15% | 7.0947<br>97 | 62 | 57.88% | 8.006<br>734 | Lsr         |
| 76485                            | 2485 | 55 | 49.34% | 6.2154<br>42 | 50 | 54.08% | 5.656<br>734 | Glt8d1      |
| 69241                            | 998  | 55 | 87.07% | 15.476<br>33 | 63 | 83.97% | 17.74<br>729 | Polr2d      |
| 109229                           | 1700 | 55 | 71.71% | 9.0855<br>13 | 43 | 53.82% | 7.111<br>18  | Fam118b     |
| gi 125988404 ref N<br>M_025375.2 | 1323 | 55 | 80.57% | 11.674<br>51 | 58 | 87.98% | 12.32<br>509 | -           |
| 50880                            | 2207 | 55 | 63.48% | 6.9983<br>57 | 73 | 80.97% | 9.299<br>137 | Scly        |
| 97884                            | 3681 | 55 | 43.77% | 4.1959<br>72 | 49 | 43.55% | 3.742<br>419 | B3galnt2    |
| 72519                            | 2280 | 55 | 67.68% | 6.7742<br>86 | 63 | 69.56% | 7.768<br>333 | Tmem55<br>a |
| 108673                           | 3003 | 55 | 41.36% | 5.1433<br>14 | 70 | 48.35% | 6.553<br>372 | Ccdc86      |
| 28080                            | 772  | 55 | 45.21% | 20.006<br>96 | 58 | 40.16% | 21.12<br>189 | Atp5o       |
| 17330                            | 2619 | 55 | 59.07% | 5.8974<br>31 | 44 | 46.66% | 4.723<br>232 | Minpp1      |
| 227674                           | 3328 | 55 | 50.72% | 4.6410<br>38 | 57 | 52.16% | 4.815<br>193 | Ddx31       |
| 68048                            | 2580 | 55 | 56.94% | 5.9865<br>79 | 48 | 47.60% | 5.230<br>505 | Aen         |

|                                     |       |    |        |              |     |        |              |         |
|-------------------------------------|-------|----|--------|--------------|-----|--------|--------------|---------|
| 68817                               | 3539  | 55 | 33.06% | 4.3643<br>33 | 34  | 23.11% | 2.700<br>974 | Ddi2    |
| 70527                               | 2157  | 55 | 59.81% | 7.1605<br>81 | 37  | 51.32% | 4.822<br>516 | Stampb  |
| 69743                               | 7966  | 55 | 19.96% | 1.9389<br>12 | 41  | 14.74% | 1.446<br>99  | Casz1   |
| 106347                              | 2897  | 55 | 49.81% | 5.3315<br>06 | 43  | 41.04% | 4.172<br>939 | Ildr1   |
| 69113                               | 1247  | 55 | 79.07% | 12.386<br>02 | 52  | 78.59% | 11.72<br>355 | Alkbh3  |
| 56347                               | 2896  | 55 | 6.49%  | 5.3333<br>47 | 39  | 6.15%  | 3.786<br>066 | Eif3c   |
| 30055                               | 1225  | 55 | 54.69% | 12.608<br>47 | 54  | 62.45% | 12.39<br>31  | Timm13  |
| 72999                               | 2449  | 55 | 60.23% | 6.3068<br>08 | 54  | 58.27% | 6.199<br>078 | Insig2  |
| 68401                               | 1612  | 55 | 63.77% | 9.5814<br>97 | 59  | 63.52% | 10.28<br>985 | G6pc3   |
| 1E+08                               | 12971 | 55 | 17.79% | 1.1907<br>62 | 41  | 13.17% | 0.888<br>654 | Nhsl2   |
| 216578                              | 3776  | 55 | 47.19% | 4.0904<br>06 | 25  | 30.75% | 1.861<br>359 | Papolg  |
| gi 149264002 ref X<br>M_001473865.1 | 2579  | 55 | 56.42% | 5.9889       | 50  | 45.87% | 5.450<br>556 | -       |
| 319924                              | 6649  | 55 | 26.11% | 2.3229<br>62 | 56  | 26.59% | 2.367<br>848 | Apba1   |
| 268469                              | 2668  | 55 | 50.64% | 5.7891<br>2  | 42  | 51.99% | 4.425<br>737 | Zfp652  |
| 21416                               | 4163  | 55 | 46.17% | 3.7101<br>54 | 105 | 57.53% | 7.090<br>96  | Tcf7l2  |
| 11416                               | 3109  | 55 | 48.44% | 4.9679<br>55 | 52  | 43.13% | 4.702<br>239 | Slc33a1 |
| 30938                               | 3110  | 55 | 51.45% | 4.9663<br>58 | 39  | 50.19% | 3.525<br>546 | Fgd3    |
| 233405                              | 2595  | 55 | 58.81% | 5.9519<br>74 | 26  | 31.87% | 2.816<br>814 | Vps33b  |
| 214063                              | 3913  | 55 | 47.69% | 3.9471<br>95 | 27  | 27.34% | 1.939<br>885 | Dnajc16 |
| 231655                              | 2124  | 55 | 68.31% | 7.2718<br>33 | 315 | 95.90% | 41.69<br>444 | Oas1l   |
| 21897                               | 2567  | 55 | 49.90% | 6.0168<br>96 | 34  | 47.29% | 3.723<br>704 | Tlr1    |
| 76071                               | 2382  | 55 | 55.12% | 6.4842<br>04 | 32  | 47.27% | 3.776<br>855 | Jakmip1 |



|                              |       |    |        |              |    |        |              |                   |
|------------------------------|-------|----|--------|--------------|----|--------|--------------|-------------------|
| 78541                        | 2176  | 55 | 54.27% | 7.0980<br>57 | 48 | 47.66% | 6.201<br>61  | Asb8              |
| 72654                        | 845   | 55 | 55.86% | 18.278<br>55 | 39 | 52.66% | 12.97<br>568 | Ccdc12            |
| 26425                        | 2139  | 55 | 56.94% | 7.2208<br>38 | 42 | 48.71% | 5.520<br>274 | Nubp1             |
| 19653                        | 2606  | 55 | 54.64% | 5.9268<br>51 | 47 | 43.51% | 5.070<br>439 | Rbm4              |
| 70560                        | 4388  | 55 | 40.36% | 3.5199<br>12 | 31 | 26.73% | 1.986<br>174 | Wars2             |
| 108899                       | 5017  | 55 | 36.02% | 3.0786<br>07 | 60 | 31.85% | 3.362<br>244 | 2700081<br>O15Rik |
| 105837                       | 3384  | 55 | 30.29% | 4.5642<br>36 | 34 | 12.65% | 2.824<br>689 | Mtbp              |
| 99730                        | 1289  | 55 | 64.70% | 11.982<br>45 | 56 | 51.59% | 12.21<br>398 | Taf13             |
| 20641                        | 837   | 55 | 70.73% | 18.453<br>25 | 85 | 62.13% | 28.55<br>062 | Snrpd1            |
| 224823                       | 1212  | 54 | 85.15% | 12.512       | 41 | 76.90% | 9.510<br>5   | Rrp36             |
| 22025                        | 3827  | 54 | 44.94% | 3.9625<br>16 | 46 | 44%    | 3.379<br>259 | Nr2c1             |
| 66419                        | 2882  | 54 | 26.02% | 5.2618<br>14 | 32 | 22.55% | 3.121<br>606 | Mrpl11            |
| 108116                       | 4697  | 54 | 32.53% | 3.2285<br>6  | 65 | 41.37% | 3.890<br>585 | Slco3a1           |
| 230101                       | 3552  | 54 | 45.02% | 4.2692<br>98 | 36 | 33.87% | 2.849<br>388 | Gba2              |
| 64009                        | 10876 | 54 | 17.88% | 1.3943<br>13 | 15 | 4.75%  | 0.387<br>743 | Syne1             |
| 233890                       | 2268  | 54 | 57.63% | 6.6863<br>09 | 34 | 46.91% | 4.214<br>616 | Zfp768            |
| 69550                        | 866   | 54 | 73.79% | 17.511<br>03 | 87 | 75.29% | 28.24<br>382 | Bst2              |
| 74479                        | 2581  | 54 | 57.96% | 5.8754<br>54 | 44 | 56.49% | 4.792<br>772 | Snx11             |
| 68537                        | 786   | 54 | 89.19% | 19.293<br>32 | 58 | 89.69% | 20.74<br>567 | Mrpl13            |
| 117589                       | 5057  | 54 | 35.42% | 2.9987<br>24 | 26 | 20.86% | 1.445<br>448 | Asb7              |
| gi 146198585 ref NM_178659.5 | 3903  | 54 | 49.78% | 3.8853<br>57 | 49 | 40.12% | 3.529<br>553 | -                 |
| 20411                        | 6320  | 54 | 32.53% | 2.3994<br>54 | 42 | 23.59% | 1.868<br>333 | Sorbs1            |

|                                  |      |    |        |              |     |        |              |              |
|----------------------------------|------|----|--------|--------------|-----|--------|--------------|--------------|
| 243371                           | 2932 | 54 | 50.14% | 5.1720<br>83 | 28  | 31.72% | 2.684<br>826 | Lrrc61       |
| 229776                           | 4511 | 54 | 34.63% | 3.3616<br>82 | 41  | 24.45% | 2.555<br>249 | Cdc14a       |
| 76044                            | 6604 | 54 | 28.91% | 2.2962<br>67 | 39  | 22.65% | 1.660<br>274 | Ncapg2       |
| 227094                           | 3423 | 54 | 46.45% | 4.4301<br>92 | 23  | 27.14% | 1.889<br>048 | Tmem19<br>4b |
| 70103                            | 1032 | 54 | 58.62% | 14.694<br>33 | 80  | 63.18% | 21.79<br>377 | Znhit1       |
| gi 94378196 ref X<br>M_979045.1  | 6890 | 54 | 32.50% | 2.2009<br>5  | 34  | 20.78% | 1.387<br>337 | -            |
| 20595                            | 1227 | 54 | 76.53% | 12.359<br>04 | 48  | 78%    | 10.99<br>813 | Smn1         |
| 68023                            | 1547 | 54 | 59.53% | 9.8025<br>52 | 38  | 57.08% | 6.905<br>822 | Pdf          |
| 66904                            | 2291 | 54 | 67.48% | 6.6191<br>83 | 61  | 66.65% | 7.485<br>604 | Pccb         |
| 19672                            | 3063 | 54 | 49.13% | 4.9508<br>81 | 48  | 45.38% | 4.405<br>715 | Rcn1         |
| 28135                            | 2696 | 54 | 56.12% | 5.6248<br>32 | 53  | 51.45% | 5.526<br>855 | Cep63        |
| gi 240255549 ref N<br>R_027828.1 | 2259 | 54 | 51.97% | 6.7129<br>47 | 77  | 56.75% | 9.582<br>892 | -            |
| 70974                            | 8641 | 54 | 23%    | 1.7549<br>53 | 47  | 22.39% | 1.529<br>171 | Pgm211       |
| 19883                            | 1657 | 54 | 74.77% | 9.1518<br>09 | 47  | 64.15% | 7.974<br>39  | Rora         |
| 15242                            | 1771 | 54 | 65.67% | 8.5627<br>04 | 27  | 48.62% | 4.286<br>15  | Hhex         |
| 97761                            | 4791 | 54 | 38.66% | 3.1652<br>16 | 23  | 19.56% | 1.349<br>658 | Sgsm2        |
| 76205                            | 1301 | 54 | 81.01% | 11.656<br>07 | 49  | 79.71% | 10.58<br>866 | Stard3nl     |
| 66816                            | 3408 | 54 | 48.86% | 4.4496<br>91 | 40  | 41.37% | 3.299<br>761 | Thap2        |
| 56046                            | 2671 | 54 | 51.78% | 5.6774<br>8  | 33  | 41.48% | 3.473<br>459 | Uqcc         |
| 242747                           | 4283 | 54 | 40.25% | 3.5406<br>37 | 40  | 31.29% | 2.625<br>633 | Zfp933       |
| 209815                           | 2659 | 54 | 55.25% | 5.7031<br>02 | 35  | 40.73% | 3.700<br>597 | Tbc1d25      |
| 22413                            | 2115 | 54 | 56.55% | 7.1699<br>99 | 162 | 81.23% | 21.53<br>41  | Wnt2         |

|                                  |      |    |        |              |    |        |              |                   |
|----------------------------------|------|----|--------|--------------|----|--------|--------------|-------------------|
| 66493                            | 1515 | 53 | 54.06% | 9.8242<br>4  | 54 | 44.22% | 10.02<br>082 | Mrpl51            |
| 59048                            | 1507 | 53 | 60.58% | 9.8763<br>92 | 73 | 71.13% | 13.61<br>858 | C1galt1c<br>1     |
| 1E+08                            | 2796 | 53 | 48.57% | 5.3232<br>2  | 62 | 47%    | 6.234<br>141 | F630028<br>O10Rik |
| 224824                           | 3214 | 53 | 47.67% | 4.6309<br>03 | 53 | 48.60% | 4.636<br>093 | Pex6              |
| 14128                            | 2241 | 53 | 60.29% | 6.6415<br>54 | 9  | 10.89% | 1.129<br>075 | Fcer2a            |
| 69260                            | 2813 | 53 | 32.46% | 5.2910<br>5  | 50 | 29.26% | 4.997<br>15  | Ing2              |
| 233865                           | 6191 | 53 | 30.14% | 2.4040<br>9  | 48 | 25.81% | 2.179<br>729 | D430042<br>O09Rik |
| 18634                            | 1894 | 53 | 63.36% | 7.8583<br>54 | 52 | 63.94% | 7.718<br>724 | Pex7              |
| 83703                            | 2103 | 53 | 61.86% | 7.0773<br>77 | 58 | 65.38% | 7.753<br>733 | Dbr1              |
| 67298                            | 5900 | 53 | 33.39% | 2.5226<br>65 | 32 | 21.90% | 1.524<br>825 | Gprasp1           |
| 230857                           | 4856 | 53 | 37.69% | 3.0650<br>17 | 62 | 40.14% | 3.589<br>51  | Ece1              |
| 72825                            | 2112 | 53 | 55.59% | 7.0472<br>17 | 43 | 55.02% | 5.723<br>961 | Mon1a             |
| 107581                           | 5222 | 53 | 34.85% | 2.8501<br>96 | 47 | 36.52% | 2.530<br>365 | Col16a1           |
| 76792                            | 2670 | 53 | 54.57% | 5.5744<br>28 | 42 | 51.91% | 4.422<br>422 | 2410131<br>K14Rik |
| 1E+08                            | 3513 | 53 | 25.28% | 4.2367<br>56 | 79 | 41.96% | 6.322<br>241 | Gm4021            |
| 69641                            | 2427 | 53 | 57.81% | 6.1325<br>6  | 49 | 54.59% | 5.676<br>079 | Wdr20a            |
| 56380                            | 3807 | 53 | 43.26% | 3.9095<br>67 | 31 | 31.02% | 2.289<br>291 | Arid3b            |
| gi 21617846 ref N<br>M_133679.1  | 1468 | 53 | 72.75% | 10.138<br>78 | 68 | 80.52% | 13.02<br>282 | -                 |
| 16886                            | 4668 | 53 | 36.05% | 3.1884<br>58 | 34 | 28.53% | 2.047<br>718 | Limk2             |
| gi 146198727 ref N<br>M_173785.5 | 4024 | 53 | 44.14% | 3.6987<br>38 | 44 | 40.68% | 3.074<br>092 | -                 |
| 234362                           | 2464 | 53 | 56.41% | 6.0404<br>72 | 56 | 56.01% | 6.389<br>538 | Zfp868            |
| 243867                           | 2962 | 53 | 52.19% | 5.0248<br>9  | 29 | 37.31% | 2.752<br>549 | Fbxo46            |

|                                     |       |    |        |              |    |        |              |                   |
|-------------------------------------|-------|----|--------|--------------|----|--------|--------------|-------------------|
| 108098                              | 780   | 53 | 82.18% | 19.081<br>7  | 58 | 81.79% | 20.90<br>526 | Med21             |
| 100206                              | 1368  | 53 | 71.86% | 10.879<br>91 | 23 | 52.41% | 4.726<br>763 | Adprh12           |
| 238377                              | 3241  | 53 | 55.17% | 4.5923<br>24 | 51 | 51.47% | 4.423<br>981 | Gpr68             |
| 668415                              | 2200  | 53 | 19.27% | 6.7653<br>29 | 68 | 19.64% | 8.689<br>771 | Gm9159            |
| 192191                              | 3013  | 53 | 39.13% | 4.9398<br>35 | 40 | 42.81% | 3.732<br>355 | Med9              |
| gi 118130457 ref N<br>M_177686.3    | 2180  | 53 | 52.98% | 6.8273<br>96 | 37 | 46.01% | 4.771<br>636 | -                 |
| 74173                               | 1073  | 53 | 73.44% | 13.871<br>13 | 58 | 82.95% | 15.19<br>674 | 1700012<br>B15Rik |
| gi 149253197 ref X<br>M_001477622.1 | 5721  | 53 | 9.42%  | 2.6015<br>95 | 76 | 11.19% | 3.734<br>769 | -                 |
| 22130                               | 4170  | 53 | 46.24% | 3.5692<br>38 | 30 | 29.64% | 2.022<br>587 | Ttf1              |
| 109032                              | 1947  | 53 | 45.20% | 7.6444<br>39 | 74 | 59.37% | 10.68<br>533 | Sp110             |
| 14426                               | 5136  | 53 | 36.51% | 2.8979<br>21 | 50 | 35.81% | 2.736<br>952 | Galnt4            |
| 71989                               | 1827  | 53 | 73.29% | 8.1465<br>37 | 42 | 59.11% | 6.462<br>981 | Rpusd4            |
| 15983                               | 1980  | 53 | 70.91% | 7.5170<br>32 | 41 | 62.42% | 5.821<br>579 | Ifrd2             |
| 67704                               | 991   | 53 | 48.64% | 15.018<br>89 | 49 | 63.87% | 13.90<br>095 | 1810037<br>I17Rik |
| 320271                              | 10705 | 53 | 20.12% | 1.3903<br>52 | 25 | 11.03% | 0.656<br>562 | Scai              |
| 229503                              | 2847  | 53 | 49.07% | 5.2278<br>62 | 35 | 42.11% | 3.456<br>23  | Rrnad1            |
| 74197                               | 3058  | 53 | 48.99% | 4.8671<br>43 | 33 | 33.09% | 3.033<br>881 | Gtf2e1            |
| gi 148539995 ref N<br>M_009677.4    | 3544  | 53 | 15.04% | 4.1996<br>96 | 26 | 13.06% | 2.062<br>537 | -                 |
| 52064                               | 2001  | 53 | 68.32% | 7.4381<br>42 | 34 | 59.97% | 4.776<br>986 | Coq5              |
| 66161                               | 1214  | 53 | 78.42% | 12.260<br>07 | 45 | 70.68% | 10.42<br>116 | Pop4              |
| 12289                               | 9079  | 53 | 23.84% | 1.6393<br>57 | 39 | 18.34% | 1.207<br>671 | Cacna1d           |
| 64450                               | 2971  | 53 | 49.85% | 5.0096<br>68 | 50 | 46.75% | 4.731<br>398 | Gpr85             |

|                                 |      |    |        |              |    |        |              |                   |
|---------------------------------|------|----|--------|--------------|----|--------|--------------|-------------------|
| 66915                           | 760  | 53 | 42.24% | 19.583<br>85 | 76 | 55.26% | 28.11<br>397 | Myeov2            |
| 93671                           | 4492 | 53 | 31.50% | 3.3133<br>84 | 39 | 31.06% | 2.440<br>883 | Cd163             |
| 54630                           | 2376 | 53 | 56.31% | 6.2641<br>93 | 48 | 51.05% | 5.679<br>589 | Prickle3          |
| gi 108773812 ref NM_001002929.3 | 2147 | 53 | 57.62% | 6.9323<br>35 | 53 | 50.72% | 6.940<br>103 | -                 |
| 68187                           | 6467 | 53 | 29.53% | 2.3014<br>88 | 50 | 24.17% | 2.173<br>648 | Fam135a           |
| 22640                           | 1900 | 53 | 63%    | 7.8335<br>38 | 46 | 59.58% | 6.806<br>539 | Zfp1              |
| 246710                          | 5231 | 53 | 36.63% | 2.8452<br>92 | 22 | 19.35% | 1.182<br>388 | Rhobtb2           |
| 75406                           | 758  | 53 | 80.47% | 19.635<br>52 | 65 | 89.71% | 24.10<br>828 | Ndufs7            |
| 271221                          | 2651 | 53 | 54.85% | 5.6143<br>81 | 25 | 31.08% | 2.651<br>26  | 5031414<br>D18Rik |
| 60361                           | 1282 | 53 | 69.50% | 11.609<br>77 | 7  | 24.65% | 1.535<br>084 | Ms4a4b            |
| 72599                           | 1823 | 52 | 65.61% | 8.0103<br>66 | 50 | 60.67% | 7.710<br>907 | Pdia5             |
| 56857                           | 4440 | 52 | 37.68% | 3.2889<br>41 | 30 | 24.03% | 1.899<br>592 | Slc37a2           |
| 68349                           | 940  | 52 | 58.83% | 15.535       | 37 | 49.26% | 11.06<br>614 | Ndufs3            |
| 69807                           | 3196 | 52 | 47.15% | 4.5691<br>17 | 38 | 41.11% | 3.342<br>712 | Trim32            |
| 229725                          | 3064 | 52 | 35.57% | 4.7659<br>59 | 50 | 42.46% | 4.587<br>788 | Clcc1             |
| 57752                           | 9103 | 52 | 15.91% | 1.6041<br>85 | 40 | 16.58% | 1.235<br>371 | Tacc2             |
| 54125                           | 2943 | 52 | 50.83% | 4.9619<br>09 | 31 | 33.67% | 2.961<br>376 | Polm              |
| 18557                           | 3061 | 52 | 49.82% | 4.7706<br>3  | 44 | 49.26% | 4.041<br>21  | Cdk18             |
| 20174                           | 1675 | 52 | 74.57% | 8.7181<br>48 | 63 | 83.58% | 10.57<br>421 | Ruvbl2            |
| 72106                           | 2108 | 52 | 55.65% | 6.9273<br>71 | 50 | 51.47% | 6.668<br>398 | Jmjd8             |
| 69955                           | 2140 | 52 | 59.16% | 6.8237<br>84 | 51 | 54.72% | 6.700<br>057 | Fars2             |
| 226499                          | 3255 | 52 | 40.89% | 4.4862<br>97 | 44 | 34.50% | 3.800<br>352 | BC0033<br>31      |

|        |      |    |        |              |    |        |              |                   |
|--------|------|----|--------|--------------|----|--------|--------------|-------------------|
| 66998  | 2065 | 52 | 64.16% | 7.0716<br>21 | 52 | 53.22% | 7.079<br>546 | Psm5              |
| 1E+08  | 9833 | 52 | 18.50% | 1.4850<br>91 | 33 | 12.43% | 0.943<br>518 | 5830417<br>I10Rik |
| 17125  | 3133 | 52 | 52.79% | 4.6609<br>95 | 25 | 29.11% | 2.243<br>374 | Smad1             |
| 69821  | 3315 | 52 | 53.39% | 4.4050<br>97 | 39 | 40.21% | 3.307<br>525 | Mterfd2           |
| 19122  | 2206 | 52 | 58.88% | 6.6196<br>27 | 33 | 45.78% | 4.205<br>625 | Prnp              |
| 27402  | 2527 | 52 | 36.05% | 5.7787<br>49 | 44 | 37.32% | 4.895<br>19  | Pdhx              |
| 224671 | 6857 | 52 | 21.48% | 2.1296<br>34 | 34 | 15.63% | 1.394<br>013 | Btbd9             |
| 66245  | 1488 | 52 | 79.30% | 9.8137<br>76 | 54 | 72.72% | 10.20<br>265 | Hspbp1            |
| 66583  | 1622 | 52 | 53.21% | 9.0030<br>2  | 37 | 54.81% | 6.413<br>174 | Exosc1            |
| 72320  | 2535 | 52 | 56.02% | 5.7605<br>12 | 33 | 45.92% | 3.659<br>806 | 2510003<br>E04Rik |
| 229589 | 3160 | 52 | 47.22% | 4.6211<br>7  | 47 | 45.51% | 4.181<br>508 | Prune             |
| 58180  | 6360 | 52 | 31.48% | 2.2960<br>53 | 57 | 31.16% | 2.519<br>648 | Hic2              |
| 225845 | 3523 | 52 | 28.41% | 4.1450<br>18 | 69 | 32.36% | 5.506<br>283 | Pla2g16           |
| 30838  | 1946 | 52 | 54.21% | 7.5040<br>59 | 33 | 43.53% | 4.767<br>528 | Fbxw4             |
| 227960 | 3288 | 52 | 41.94% | 4.4412<br>71 | 51 | 47.63% | 4.360<br>743 | Gca               |
| 70333  | 2248 | 52 | 59.07% | 6.4959<br>51 | 60 | 68.28% | 7.503<br>728 | Cd3eap            |
| 66972  | 3376 | 52 | 52.58% | 4.3255<br>03 | 57 | 52.49% | 4.746<br>73  | Slc25a23          |
| 230801 | 2941 | 52 | 41.48% | 4.9652<br>83 | 39 | 34.65% | 3.728<br>136 | Pigv              |
| 67515  | 1832 | 52 | 71.29% | 7.9710<br>14 | 30 | 42.85% | 4.603<br>815 | Ttc33             |
| 235527 | 3259 | 52 | 44.22% | 4.4807<br>91 | 30 | 31.27% | 2.587<br>969 | Plscr4            |
| 100087 | 1556 | 52 | 66.97% | 9.3848<br>96 | 54 | 71.98% | 9.756<br>775 | Kti12             |
| 26926  | 2115 | 52 | 68.04% | 6.9044<br>44 | 62 | 74.56% | 8.241<br>446 | Aifm1             |

|        |      |    |        |              |    |        |              |              |
|--------|------|----|--------|--------------|----|--------|--------------|--------------|
| 78787  | 6495 | 52 | 32.84% | 2.2483<br>29 | 38 | 21.37% | 1.644<br>851 | Usp54        |
| 338371 | 5164 | 52 | 34.16% | 2.8278<br>27 | 34 | 24.79% | 1.851<br>036 | Endov        |
| 208092 | 1561 | 52 | 70.02% | 9.3548<br>35 | 38 | 55.35% | 6.843<br>887 | Chmp6        |
| 209478 | 4209 | 52 | 42.43% | 3.4694<br>46 | 35 | 28.75% | 2.337<br>821 | Tbc1d12      |
| 230967 | 3293 | 52 | 49.71% | 4.4345<br>27 | 46 | 48.50% | 3.927<br>247 | BC0463<br>31 |
| 269713 | 4995 | 52 | 34.75% | 2.9235<br>03 | 51 | 30.13% | 2.870<br>495 | Clip2        |
| 217558 | 6703 | 52 | 31.33% | 2.1785<br>62 | 39 | 23.51% | 1.635<br>752 | G2e3         |
| 70757  | 3603 | 52 | 31.61% | 4.0529<br>83 | 68 | 36.58% | 5.305<br>994 | Ptplb        |
| 68523  | 680  | 52 | 86.32% | 21.474<br>85 | 63 | 92.65% | 26.04<br>676 | Fam96b       |
| 77951  | 1501 | 52 | 70.02% | 9.7287<br>8  | 48 | 72.09% | 8.990<br>476 | Cyp20a1      |
| 227102 | 1849 | 52 | 67.50% | 7.8977<br>27 | 38 | 60.09% | 5.777<br>884 | Ormdl1       |
| 373864 | 7635 | 52 | 27.37% | 1.9126<br>26 | 58 | 23.48% | 2.135<br>704 | Col27a1      |
| 19200  | 1853 | 52 | 61.74% | 7.8806<br>79 | 24 | 42.58% | 3.641<br>312 | Pstpip1      |
| 23962  | 3136 | 52 | 45.31% | 4.6565<br>36 | 70 | 53.76% | 6.275<br>439 | Oasl2        |
| 101206 | 1855 | 52 | 61.24% | 7.8721<br>82 | 47 | 60%    | 7.123<br>215 | Tada3        |
| 269702 | 8226 | 52 | 26.03% | 1.7752<br>13 | 22 | 11.04% | 0.751<br>893 | Mphosph<br>9 |
| 22427  | 6383 | 52 | 19.72% | 2.2877<br>8  | 42 | 19.99% | 1.849<br>893 | Wrm          |
| 55960  | 1606 | 52 | 63.51% | 9.0927<br>14 | 42 | 62.76% | 7.352<br>345 | Ebag9        |
| 13401  | 2520 | 52 | 52.86% | 5.7948<br>01 | 65 | 54.33% | 7.251<br>618 | Dmwd         |
| 18803  | 4435 | 52 | 38.38% | 3.2926<br>49 | 17 | 15.13% | 1.077<br>649 | Plcg1        |
| 216439 | 5633 | 51 | 31.03% | 2.5425<br>3  | 26 | 20.08% | 1.297<br>644 | Agap2        |
| 70383  | 2921 | 51 | 54.43% | 4.9031<br>4  | 32 | 39.44% | 3.079<br>928 | Cox10        |

|        |      |    |        |              |     |        |              |               |
|--------|------|----|--------|--------------|-----|--------|--------------|---------------|
| 66455  | 1781 | 51 | 65.52% | 8.0415<br>91 | 46  | 56.04% | 7.261<br>328 | Cnpy4         |
| 224656 | 2729 | 51 | 53.06% | 5.2481<br>03 | 29  | 38.11% | 2.987<br>56  | Zfp523        |
| 320816 | 2356 | 51 | 52.63% | 6.0789<br>78 | 20  | 27.59% | 2.386<br>585 | Ankrd16       |
| 16491  | 1968 | 51 | 63.06% | 7.2774<br>76 | 39  | 48.83% | 5.571<br>365 | Kcna3         |
| 81913  | 1215 | 51 | 76.95% | 11.787<br>71 | 43  | 59.01% | 9.949<br>799 | Bambi-p<br>s1 |
| 381066 | 2600 | 51 | 22.92% | 5.5084<br>9  | 41  | 21.50% | 4.433<br>356 | Zfp948        |
| 66125  | 750  | 51 | 84.40% | 19.096<br>1  | 60  | 92.67% | 22.49<br>117 | Sf3b5         |
| 245886 | 4292 | 51 | 30.36% | 3.3369<br>23 | 61  | 31.87% | 3.995<br>694 | Ankrd27       |
| 215008 | 4479 | 51 | 31.99% | 3.1976<br>05 | 27  | 24.13% | 1.694<br>747 | Vezt          |
| 12571  | 2470 | 51 | 60.24% | 5.7984<br>1  | 26  | 35.02% | 2.959<br>365 | Cdk6          |
| 101202 | 2236 | 51 | 60.82% | 6.4052<br>21 | 23  | 38.33% | 2.891<br>866 | Hepacam<br>2  |
| 268281 | 7385 | 51 | 17.25% | 1.9393<br>46 | 31  | 11.89% | 1.180<br>139 | Shprh         |
| 245174 | 6920 | 51 | 15.77% | 2.0696<br>64 | 44  | 11.47% | 1.787<br>593 | Zfp937        |
| 93675  | 988  | 51 | 80.06% | 14.496<br>03 | 22  | 52.43% | 6.260<br>195 | Clec2i        |
| 15528  | 788  | 51 | 57.99% | 18.175<br>22 | 66  | 66.12% | 23.54<br>723 | Hspe1         |
| 56284  | 5016 | 51 | 30.52% | 2.8552<br>78 | 43  | 26.14% | 2.410<br>089 | Mrpl19        |
| 16594  | 3032 | 51 | 54.09% | 4.7236<br>39 | 38  | 39.22% | 3.523<br>518 | Klc2          |
| 13667  | 2119 | 51 | 54.79% | 6.7588<br>83 | 30  | 40.40% | 3.980<br>269 | Eif2b4        |
| 72482  | 1504 | 51 | 67.02% | 9.5226<br>55 | 54  | 76.33% | 10.09<br>411 | Acbd6         |
| 231532 | 3353 | 51 | 49.33% | 4.2714<br>21 | 59  | 51.74% | 4.946<br>985 | Arhgap2<br>4  |
| 19152  | 983  | 51 | 69.28% | 14.569<br>76 | 159 | 79.15% | 45.47<br>427 | Prtn3         |
| 69269  | 888  | 51 | 79.62% | 16.128<br>46 | 32  | 82.77% | 10.13<br>116 | Scnm1-p<br>s  |



|                              |      |    |        |              |    |        |              |                    |
|------------------------------|------|----|--------|--------------|----|--------|--------------|--------------------|
| 97827                        | 3323 | 51 | 44.21% | 4.3099<br>83 | 26 | 32.68% | 2.199<br>708 | Exd2               |
| 107895                       | 3104 | 51 | 47.84% | 4.6140<br>7  | 23 | 26.51% | 2.083<br>187 | Mgat5              |
| 14683                        | 3775 | 51 | 3.71%  | 3.7939<br>27 | 58 | 3.60%  | 4.319<br>497 | Gnas               |
| 20598                        | 1621 | 51 | 66.07% | 8.8353<br>32 | 21 | 44.42% | 3.642<br>155 | Smpd2              |
| 69504                        | 2075 | 51 | 59.18% | 6.9022<br>04 | 30 | 45.25% | 4.064<br>67  | Zfp932             |
| 269881                       | 3690 | 51 | 46.45% | 3.8813<br>21 | 39 | 37.53% | 2.971<br>395 | Map3k1<br>0        |
| 71767                        | 2286 | 51 | 51.40% | 6.2651<br>24 | 36 | 38.58% | 4.427<br>396 | Tysnd1             |
| 67870                        | 1844 | 51 | 75.22% | 7.7668<br>51 | 45 | 59.38% | 6.860<br>783 | Enoph1             |
| 212398                       | 2176 | 51 | 61.58% | 6.5818<br>35 | 47 | 53.86% | 6.072<br>41  | Frat2              |
| 330812                       | 9685 | 51 | 20.95% | 1.4787<br>89 | 36 | 14.69% | 1.045<br>021 | Rnf150             |
| 74998                        | 5373 | 51 | 29.56% | 2.6655<br>64 | 20 | 14%    | 1.046<br>49  | Rab11fip<br>2      |
| gi 149269233 ref XR_030915.1 | 1394 | 51 | 42.75% | 10.274<br>08 | 32 | 37.45% | 6.453<br>708 | -                  |
| 76889                        | 2190 | 51 | 60%    | 6.5397<br>59 | 45 | 59.59% | 5.776<br>842 | Adck4              |
| gi 41235746 ref NM_201359.1  | 1630 | 51 | 70.25% | 8.7865<br>48 | 57 | 74.66% | 9.831<br>264 | -                  |
| 30939                        | 1698 | 51 | 46.88% | 8.4346<br>72 | 52 | 43.40% | 8.609<br>695 | Pttg1              |
| 65112                        | 4531 | 51 | 18.52% | 3.1609<br>08 | 64 | 20.19% | 3.971<br>074 | Pmepa1             |
| 52653                        | 1618 | 50 | 63.78% | 8.6781<br>51 | 40 | 54.14% | 6.950<br>301 | Nudcd2             |
| 12626                        | 1013 | 50 | 67.52% | 13.861<br>05 | 69 | 68.02% | 19.14<br>969 | Cetn3              |
| 667214                       | 3863 | 50 | 22.03% | 3.6348<br>04 | 18 | 13.20% | 1.309<br>996 | 9930111<br>J21Rik1 |
| 67525                        | 3216 | 50 | 49.04% | 4.3660<br>6  | 24 | 26.93% | 2.098<br>057 | Trim62             |
| 72296                        | 3799 | 50 | 32.17% | 3.6960<br>38 | 54 | 29.22% | 3.996<br>194 | Rusc1              |
| 75763                        | 7739 | 50 | 25.09% | 1.8143<br>49 | 41 | 19.68% | 1.489<br>434 | Dcaf17             |

|                                     |      |    |        |              |    |        |              |               |
|-------------------------------------|------|----|--------|--------------|----|--------|--------------|---------------|
| 68034                               | 1696 | 50 | 60.38% | 8.2790<br>38 | 36 | 52.77% | 5.967<br>587 | Fam122a       |
| 108841                              | 3044 | 50 | 43.04% | 4.6127<br>62 | 26 | 31.47% | 2.401<br>324 | Rdh13         |
| 64658                               | 6076 | 50 | 19.08% | 2.3109<br>36 | 45 | 14.09% | 2.082<br>173 | Mrps25        |
| 330189                              | 1860 | 50 | 68.33% | 7.5490<br>58 | 44 | 61.61% | 6.650<br>616 | Tmem12<br>0b  |
| 68153                               | 1664 | 50 | 65.87% | 8.4382<br>5  | 26 | 55.23% | 4.392<br>807 | Gtf2e2        |
| 320184                              | 8592 | 50 | 12.55% | 1.6342<br>23 | 29 | 8.61%  | 0.948<br>912 | Lrrc58        |
| 268970                              | 5317 | 50 | 35.53% | 2.6408<br>22 | 18 | 15.12% | 0.951<br>761 | Arhgap2<br>8  |
| 26379                               | 2264 | 50 | 55.26% | 6.2019<br>65 | 50 | 55.48% | 6.208<br>915 | Esrra         |
| 213208                              | 2479 | 50 | 62.97% | 5.6640<br>78 | 54 | 68.74% | 6.124<br>059 | Ii20rb        |
| 102566                              | 2599 | 50 | 50.67% | 5.4025<br>58 | 62 | 65.49% | 6.706<br>679 | Ano10         |
| 241944                              | 6625 | 50 | 29.75% | 2.1194<br>34 | 41 | 26.26% | 1.739<br>883 | D3Erd2<br>54e |
| 240753                              | 7397 | 50 | 25.82% | 1.8982<br>36 | 65 | 29.97% | 2.470<br>472 | Plekha6       |
| 50789                               | 4265 | 50 | 13.18% | 3.2922<br>04 | 29 | 11.86% | 1.911<br>618 | Fbxl3         |
| gi 149247818 ref X<br>M_001477693.1 | 2314 | 50 | 47.67% | 6.0679<br>55 | 28 | 30.86% | 3.401<br>863 | -             |
| 53895                               | 1207 | 50 | 63.79% | 11.633<br>18 | 46 | 59.90% | 10.71<br>452 | Clpp          |
| 214084                              | 3803 | 50 | 41.41% | 3.6921<br>5  | 29 | 30.13% | 2.143<br>847 | Slc18a2       |
| 68475                               | 864  | 50 | 83.45% | 16.251<br>44 | 44 | 83.22% | 14.31<br>73  | Ssna1         |
| gi 146149243 ref N<br>M_145486.4    | 3425 | 50 | 42.04% | 4.0996<br>34 | 21 | 20.26% | 1.723<br>776 | -             |
| 217827                              | 3708 | 50 | 47.79% | 3.7867<br>44 | 30 | 33.55% | 2.274<br>593 | BC0022<br>30  |
| 104086                              | 1890 | 50 | 67.72% | 7.4292<br>32 | 52 | 70%    | 7.735<br>059 | Cyp27a1       |
| gi 146149078 ref N<br>M_153410.4    | 3357 | 50 | 45.13% | 4.1826<br>77 | 42 | 38.73% | 3.517<br>386 | -             |
| 57815                               | 2910 | 50 | 49.14% | 4.8251<br>71 | 33 | 47.46% | 3.188<br>182 | Spata5        |

|        |      |    |        |              |    |        |              |                   |
|--------|------|----|--------|--------------|----|--------|--------------|-------------------|
| 17096  | 3456 | 50 | 6.92%  | 4.0628<br>61 | 63 | 6.74%  | 5.124<br>942 | Lyn               |
| 66787  | 2787 | 50 | 48.22% | 5.0381<br>23 | 44 | 40.19% | 4.438<br>516 | 4933433<br>P14Rik |
| 107449 | 5867 | 50 | 29.73% | 2.3932<br>59 | 54 | 35.83% | 2.587<br>616 | Unc5b             |
| 28010  | 1830 | 50 | 60.49% | 7.6728<br>13 | 33 | 45.63% | 5.069<br>732 | Miip              |
| 225215 | 1522 | 50 | 52.17% | 9.2255<br>24 | 61 | 48.62% | 11.26<br>775 | Rsl24d1           |
| 68079  | 1283 | 50 | 66.87% | 10.944<br>07 | 43 | 59%    | 9.422<br>452 | Pdcd2l            |
| 68092  | 2054 | 50 | 63.92% | 6.8360<br>51 | 47 | 60.13% | 6.433<br>089 | Ncbp2             |
| 228482 | 5017 | 50 | 34.10% | 2.7987<br>34 | 23 | 19.04% | 1.288<br>86  | Arhgap1<br>1a     |
| 67936  | 1499 | 50 | 68.65% | 9.3670<br>77 | 39 | 68.98% | 7.314<br>508 | Wdr55             |
| 67384  | 4798 | 50 | 37.14% | 2.9264<br>79 | 34 | 31.37% | 1.992<br>236 | Bag4              |
| 74098  | 1551 | 50 | 60.54% | 9.0530<br>29 | 38 | 56.67% | 6.888<br>012 | 0610037<br>L13Rik |
| 73182  | 4501 | 50 | 39.72% | 3.1195<br>84 | 76 | 50.81% | 4.747<br>082 | Pear1             |
| 240185 | 6748 | 50 | 30.54% | 2.0808<br>01 | 20 | 12.86% | 0.833<br>253 | 9430020<br>K01Rik |
| 68731  | 1361 | 50 | 70.76% | 10.316<br>86 | 44 | 73.62% | 9.089<br>012 | Rbfa              |
| 110695 | 3105 | 50 | 44.64% | 4.5221<br>41 | 40 | 44.03% | 3.621<br>767 | Aldh7a1           |
| 56488  | 1078 | 49 | 74.03% | 12.764<br>77 | 51 | 72.26% | 13.30<br>067 | Nxt1              |
| 50817  | 3288 | 49 | 48.33% | 4.1850<br>44 | 34 | 33%    | 2.907<br>162 | Solh              |
| 80280  | 1892 | 49 | 73.15% | 7.2729<br>51 | 37 | 62.47% | 5.497<br>974 | Cdk5rap<br>3      |
| 224893 | 2059 | 49 | 58.57% | 6.6830<br>61 | 44 | 49.49% | 6.007<br>841 | Zfp959            |
| 59054  | 1590 | 49 | 56.29% | 8.6543<br>54 | 65 | 64.91% | 11.49<br>313 | Mrps30            |
| 75398  | 768  | 49 | 78.78% | 17.917<br>22 | 76 | 84.11% | 27.82<br>111 | Mrpl32            |
| 216136 | 2348 | 49 | 52.68% | 5.8604<br>87 | 36 | 44.97% | 4.310<br>489 | Ilvbl             |

|        |      |    |        |              |    |        |              |                   |
|--------|------|----|--------|--------------|----|--------|--------------|-------------------|
| 60409  | 1196 | 49 | 52.93% | 11.505<br>37 | 44 | 61.20% | 10.34<br>293 | Trappc4           |
| 52662  | 2493 | 49 | 50.90% | 5.5196<br>24 | 36 | 44.93% | 4.059<br>779 | D18Erd<br>653e    |
| 19340  | 3868 | 49 | 41.86% | 3.5575<br>03 | 48 | 39.53% | 3.488<br>807 | Rab3d             |
| 66950  | 4204 | 49 | 35.85% | 3.2731<br>74 | 22 | 20.43% | 1.471<br>235 | Tmem20<br>6       |
| 67862  | 1243 | 49 | 84.79% | 11.070<br>33 | 32 | 69.83% | 7.237<br>706 | 2310033<br>P09Rik |
| 212647 | 3355 | 49 | 43.64% | 4.1014<br>67 | 30 | 28.11% | 2.513<br>916 | Aldh4a1           |
| 69499  | 3814 | 49 | 30.94% | 3.6078<br>72 | 46 | 27.90% | 3.390<br>777 | Tsr2              |
| 66934  | 2283 | 49 | 59.79% | 6.0273<br>43 | 23 | 38.68% | 2.832<br>331 | Dsn1              |
| 18637  | 745  | 49 | 72.35% | 18.470<br>37 | 97 | 73.56% | 36.60<br>476 | Pfdn2             |
| 19309  | 2874 | 49 | 50.38% | 4.7879       | 54 | 55.05% | 5.282<br>374 | Pygm              |
| 15382  | 1918 | 49 | 14.18% | 7.1743<br>6  | 75 | 11.99% | 10.99<br>347 | Hnrnpa1           |
| 268294 | 2850 | 49 | 52.42% | 4.8282<br>19 | 41 | 47.86% | 4.044<br>465 | Zbtb24            |
| 104859 | 7830 | 49 | 25.25% | 1.7573<br>98 | 35 | 18.51% | 1.256<br>691 | Tecpr2            |
| 66885  | 3348 | 49 | 47.07% | 4.1100<br>43 | 75 | 56.60% | 6.297<br>931 | Acadsb            |
| 16348  | 5632 | 49 | 29.56% | 2.4432<br>57 | 41 | 26.81% | 2.046<br>649 | Invs              |
| 74513  | 5646 | 49 | 31.03% | 2.4371<br>99 | 25 | 17.85% | 1.244<br>862 | Neto2             |
| 71617  | 2896 | 49 | 58.67% | 4.7515<br>27 | 40 | 43.89% | 3.883<br>144 | 9130011<br>E15Rik |
| 19018  | 780  | 49 | 77.18% | 17.641<br>57 | 64 | 72.95% | 23.06<br>787 | Scand1            |
| 74108  | 2902 | 49 | 57.86% | 4.7417<br>03 | 46 | 46.45% | 4.456<br>383 | Parn              |
| 116748 | 927  | 49 | 84.68% | 14.844<br>04 | 57 | 90.29% | 17.28<br>69  | Lsm10             |
| 239122 | 3034 | 49 | 50.49% | 4.5354<br>06 | 50 | 44.40% | 4.633<br>152 | Setdb2            |
| 215445 | 5015 | 49 | 36.59% | 2.7438<br>53 | 30 | 25.64% | 1.681<br>793 | Rab11fip<br>3     |

|                                     |       |    |        |              |    |        |              |                   |
|-------------------------------------|-------|----|--------|--------------|----|--------|--------------|-------------------|
| 17245                               | 3161  | 49 | 50.08% | 4.3531<br>87 | 25 | 30.81% | 2.223<br>503 | Mdm1              |
| 22393                               | 3564  | 49 | 46.55% | 3.8609<br>49 | 23 | 26.40% | 1.814<br>313 | Wfs1              |
| 100972                              | 1636  | 49 | 66.69% | 8.4110<br>17 | 30 | 56.11% | 5.155<br>373 | Rab28             |
| 56452                               | 1663  | 49 | 55.08% | 8.2744<br>58 | 34 | 55.80% | 5.747<br>894 | Orc6              |
| 72745                               | 2764  | 49 | 51.59% | 4.9784<br>45 | 42 | 45.77% | 4.272<br>021 | Tmem16<br>1b      |
| 353170                              | 3807  | 49 | 33.44% | 3.6145<br>06 | 35 | 29.89% | 2.584<br>683 | Txlng             |
| gi 149270705 ref X<br>M_001479468.1 | 4692  | 49 | 27%    | 2.9327<br>42 | 44 | 24.77% | 2.636<br>433 | -                 |
| 381678                              | 2271  | 49 | 19.07% | 6.0591<br>91 | 27 | 24.53% | 3.342<br>479 | Zcwpw1            |
| 622320                              | 2975  | 49 | 51.13% | 4.6253<br>52 | 45 | 48.94% | 4.252<br>533 | Kctd21            |
| 75758                               | 1330  | 49 | 75.11% | 10.346<br>18 | 44 | 69.55% | 9.300<br>861 | 9130401<br>M01Rik |
| 67563                               | 2555  | 49 | 52.17% | 5.3856<br>84 | 39 | 47.16% | 4.291<br>369 | Narfl             |
| 72747                               | 2401  | 49 | 61.10% | 5.7311<br>22 | 57 | 61.43% | 6.674<br>286 | Ttc39c            |
| gi 149257794 ref X<br>M_001480403.1 | 11542 | 49 | 2.39%  | 1.1922<br>04 | 27 | 2.19%  | 0.657<br>665 | -                 |
| 246103                              | 6870  | 49 | 16.96% | 2.0029<br>73 | 42 | 16%    | 1.718<br>758 | Atxn7             |
| 67072                               | 2517  | 49 | 53.40% | 5.4669<br>94 | 37 | 44.89% | 4.132<br>764 | Cdc3711           |
| 71735                               | 2201  | 49 | 59.38% | 6.2518<br>96 | 44 | 53.70% | 5.620<br>239 | Lrwd1             |
| 56031                               | 1168  | 48 | 77.83% | 11.540<br>75 | 47 | 81.08% | 11.31<br>298 | Ppie              |
| 170744                              | 3158  | 48 | 48.23% | 4.2683<br>97 | 45 | 51.14% | 4.006<br>107 | Thr8              |
| 171210                              | 2215  | 48 | 45.24% | 6.0855<br>97 | 25 | 34%    | 3.173<br>134 | Acot2             |
| 50498                               | 1187  | 48 | 77.34% | 11.356<br>02 | 45 | 79.95% | 10.65<br>82  | Ebi3              |
| 67664                               | 1334  | 48 | 73.69% | 10.104<br>65 | 23 | 58.25% | 4.847<br>236 | Rnf125            |
| 252875                              | 3724  | 48 | 42.78% | 3.6196<br>56 | 35 | 35.90% | 2.642<br>29  | Mios              |

|                              |      |    |        |              |    |        |              |                   |
|------------------------------|------|----|--------|--------------|----|--------|--------------|-------------------|
| 67230                        | 7933 | 48 | 21.91% | 1.6991<br>8  | 22 | 11.87% | 0.779<br>664 | Zfp329            |
| 74385                        | 3165 | 48 | 49.45% | 4.2589<br>57 | 47 | 48.53% | 4.174<br>902 | Mudeng            |
| 66272                        | 1997 | 48 | 39.61% | 6.7499<br>24 | 58 | 33.85% | 8.165<br>298 | Cox16             |
| gi 118130653 ref NM_019787.3 | 2752 | 48 | 19.04% | 4.8981<br>1  | 38 | 15.41% | 3.882<br>016 | -                 |
| 66845                        | 484  | 48 | 83.26% | 27.850<br>41 | 84 | 87.60% | 48.79<br>283 | Mrpl33            |
| 71805                        | 2928 | 48 | 45.12% | 4.6036<br>88 | 22 | 23.02% | 2.112<br>388 | Nup93             |
| 277010                       | 3077 | 48 | 23.98% | 4.3807<br>6  | 69 | 24.73% | 6.304<br>399 | Marveld<br>1      |
| 224904                       | 755  | 48 | 61.46% | 17.853<br>77 | 61 | 65.43% | 22.71<br>46  | 2410015<br>M20Rik |
| 66928                        | 769  | 48 | 81.53% | 17.528<br>74 | 42 | 93.37% | 15.35<br>483 | 3110001<br>D03Rik |
| 102060                       | 1734 | 48 | 36.62% | 7.7737<br>01 | 41 | 38.29% | 6.647<br>478 | Gadd45g<br>ip1    |
| 66200                        | 904  | 48 | 69.58% | 14.911<br>06 | 29 | 56.42% | 9.018<br>861 | Comm6             |
| gi 149261641 ref XR_002349.2 | 4024 | 48 | 26.32% | 3.3498<br>01 | 41 | 25.94% | 2.864<br>495 | -                 |
| 27376                        | 4000 | 48 | 32.70% | 3.3699       | 28 | 28.30% | 1.967<br>978 | Slc25a10          |
| 246703                       | 905  | 48 | 85.08% | 14.894<br>58 | 59 | 86.30% | 18.32<br>844 | Apoa1bp           |
| 67728                        | 2526 | 48 | 60.49% | 5.3363<br>41 | 31 | 36.50% | 3.450<br>249 | Dph2              |
| 12153                        | 4464 | 48 | 40.59% | 3.0196<br>23 | 38 | 32.37% | 2.393<br>214 | Bmp1              |
| 381091                       | 3380 | 48 | 42.01% | 3.9880<br>47 | 20 | 24.85% | 1.663<br>548 | H2-Eb2            |
| 27218                        | 2688 | 48 | 53.79% | 5.0147<br>31 | 50 | 54.28% | 5.229<br>532 | Slamf1            |
| 80987                        | 2870 | 48 | 51.08% | 4.6967<br>24 | 29 | 38.29% | 2.840<br>784 | Nckipsd           |
| 69606                        | 2042 | 48 | 57.39% | 6.6011<br>74 | 39 | 57.39% | 5.369<br>465 | Mtfmt             |
| 1E+08                        | 2277 | 48 | 52.39% | 5.9198<br>94 | 40 | 45.67% | 4.938<br>773 | Gm4589            |
| 98404                        | 3476 | 48 | 44.33% | 3.8779<br>05 | 29 | 34.18% | 2.345<br>527 | AI59747<br>9      |

|                              |      |    |        |              |    |        |              |                   |
|------------------------------|------|----|--------|--------------|----|--------|--------------|-------------------|
| 240327                       | 2648 | 48 | 55.25% | 5.0904<br>83 | 35 | 44.71% | 3.715<br>97  | Gm4951            |
| 13171                        | 3292 | 48 | 43.04% | 4.0946<br>53 | 28 | 29.53% | 2.391<br>224 | Dbt               |
| gi 149258465 ref XR_031754.1 | 1130 | 48 | 26.99% | 11.928<br>85 | 66 | 30.71% | 16.42<br>055 | -                 |
| 72807                        | 2033 | 48 | 51.65% | 6.6303<br>98 | 40 | 40.68% | 5.531<br>523 | Zfp429            |
| 65102                        | 2161 | 48 | 64.92% | 6.2376<br>67 | 39 | 50.72% | 5.073<br>784 | Nif311            |
| 237222                       | 4453 | 48 | 39.10% | 3.0270<br>82 | 27 | 21.58% | 1.704<br>642 | Ofd1              |
| 18768                        | 5581 | 48 | 27.47% | 2.4152<br>66 | 41 | 24.40% | 2.065<br>351 | Pkib              |
| 16199                        | 3086 | 48 | 33.64% | 4.3679<br>84 | 22 | 26.09% | 2.004<br>236 | Il9r              |
| 414077                       | 815  | 48 | 65.40% | 16.539<br>38 | 58 | 69.08% | 20.00<br>749 | BC0564<br>74      |
| 67278                        | 1448 | 48 | 69.75% | 9.3091<br>15 | 37 | 71.82% | 7.183<br>817 | 2900092<br>E17Rik |
| 12408                        | 1081 | 48 | 72.53% | 12.469<br>56 | 56 | 83.07% | 14.56<br>413 | Cbr1              |
| 69535                        | 919  | 48 | 77.80% | 14.667<br>68 | 54 | 80.85% | 16.51<br>963 | Ten1              |
| 56364                        | 5430 | 48 | 32.73% | 2.4824<br>31 | 30 | 21.33% | 1.553<br>258 | Zymy3             |
| gi 21450262 ref NM_144888.1  | 3036 | 48 | 52.50% | 4.4399<br>2  | 23 | 28.19% | 2.129<br>846 | -                 |
| 223920                       | 2126 | 48 | 68.86% | 6.3403<br>57 | 27 | 47.13% | 3.570<br>447 | Soat2             |
| 68165                        | 782  | 48 | 76.09% | 17.237<br>34 | 63 | 85.81% | 22.64<br>936 | Fdx11             |
| 235584                       | 3227 | 48 | 27.92% | 4.1771<br>3  | 68 | 26.19% | 5.924<br>232 | Dusp7             |
| 97165                        | 2692 | 48 | 31.46% | 5.0072<br>8  | 44 | 24.29% | 4.595<br>15  | Hmgb2             |
| 212974                       | 2975 | 48 | 48.03% | 4.5309<br>57 | 31 | 38.62% | 2.929<br>523 | Ath11             |
| 69161                        | 1107 | 48 | 55.65% | 12.176<br>69 | 53 | 56.91% | 13.46<br>016 | Manbal            |
| 76775                        | 3630 | 48 | 41.29% | 3.7133<br>88 | 51 | 48.10% | 3.949<br>896 | Slc10a7           |
| 69806                        | 2742 | 48 | 45.77% | 4.9159<br>73 | 39 | 46.10% | 3.998<br>704 | Slc39a11          |

|        |       |    |        |              |    |        |              |             |
|--------|-------|----|--------|--------------|----|--------|--------------|-------------|
| 12953  | 4019  | 47 | 38.14% | 3.2840<br>94 | 76 | 41.43% | 5.316<br>401 | Cry2        |
| 16177  | 4808  | 47 | 30.10% | 2.7451<br>69 | 50 | 36.06% | 2.923<br>665 | Il1r1       |
| 18120  | 1722  | 47 | 63.65% | 7.6647<br>93 | 37 | 69.28% | 6.040<br>748 | Mrpl49      |
| 208211 | 1772  | 47 | 56.83% | 7.4485<br>18 | 38 | 51.92% | 6.028<br>954 | Alg1        |
| 20516  | 3658  | 47 | 38.16% | 3.6081<br>94 | 30 | 28.08% | 2.305<br>683 | Slc20a2     |
| 71679  | 574   | 47 | 43.90% | 22.994<br>38 | 48 | 43.21% | 23.50<br>994 | Atp5h       |
| 13347  | 2453  | 47 | 56.30% | 5.3806<br>66 | 36 | 39.22% | 4.125<br>98  | Dffa        |
| 16164  | 3686  | 47 | 41.02% | 3.5807<br>85 | 95 | 54.64% | 7.245<br>868 | Il13ra1     |
| 77809  | 1756  | 47 | 59.62% | 7.5163<br>86 | 36 | 54.56% | 5.763<br>683 | Lrrc42      |
| 213550 | 3575  | 47 | 46.63% | 3.6919<br>65 | 39 | 38.99% | 3.066<br>978 | Dis3l       |
| 243743 | 12602 | 47 | 16.77% | 1.0473<br>55 | 50 | 14.64% | 1.115<br>457 | Plxna4      |
| 117599 | 4540  | 47 | 35.22% | 2.9072<br>19 | 37 | 31.92% | 2.291<br>226 | Helb        |
| 16651  | 4408  | 47 | 38.29% | 2.9942<br>77 | 26 | 25.73% | 1.658<br>265 | Sspn        |
| 226182 | 3258  | 47 | 43.86% | 4.0511<br>89 | 39 | 43.16% | 3.365<br>392 | Taf5        |
| 320299 | 2284  | 47 | 61.43% | 5.7787<br>97 | 57 | 59.41% | 7.016<br>182 | Iqcb1       |
| 12476  | 1909  | 47 | 60.66% | 6.9139<br>72 | 69 | 63.86% | 10.16<br>167 | Cd151       |
| 51960  | 2647  | 47 | 43.71% | 4.9863<br>14 | 22 | 26.07% | 2.336<br>635 | Kctd18      |
| 72392  | 3073  | 47 | 43.31% | 4.2950<br>78 | 27 | 29.19% | 2.470<br>15  | Tmem17<br>5 |
| 109241 | 7055  | 47 | 25.02% | 1.8708<br>4  | 26 | 15.79% | 1.036<br>092 | Mbd5        |
| 66196  | 3924  | 47 | 39.02% | 3.3636<br>02 | 28 | 27.42% | 2.006<br>093 | Myo19       |
| 14287  | 2265  | 47 | 64.55% | 5.8272<br>73 | 47 | 53.77% | 5.833<br>803 | Fpgs        |
| 71742  | 2826  | 47 | 43.91% | 4.6704<br>79 | 39 | 42.71% | 3.879<br>847 | Ulk3        |



|                             |       |    |        |              |    |        |              |                   |
|-----------------------------|-------|----|--------|--------------|----|--------|--------------|-------------------|
| 269023                      | 6112  | 47 | 28.44% | 2.1594<br>85 | 19 | 13.78% | 0.873<br>962 | Zfp608            |
| 103551                      | 2349  | 47 | 50.96% | 5.6188<br>9  | 54 | 54.70% | 6.462<br>981 | E130012<br>A19Rik |
| 73046                       | 930   | 47 | 76.24% | 14.192<br>23 | 55 | 78.49% | 16.62<br>654 | Glrx5             |
| 16728                       | 5288  | 47 | 30.22% | 2.4959<br>86 | 39 | 26.95% | 2.073<br>458 | L1cam             |
| 224008                      | 3261  | 47 | 43.79% | 4.0474<br>62 | 62 | 49.40% | 5.345<br>188 | 2310008<br>H04Rik |
| 14676                       | 1974  | 47 | 55.12% | 6.6863<br>09 | 23 | 37.69% | 3.275<br>69  | Gna15             |
| gi 91064868 ref NM_172619.2 | 3731  | 47 | 45.05% | 3.5375<br>97 | 26 | 28.38% | 1.959<br>161 | -                 |
| 1E+08                       | 4075  | 47 | 21.87% | 3.2389<br>63 | 53 | 24.05% | 3.656<br>54  | Gm4408            |
| 217588                      | 1509  | 47 | 57.06% | 8.7467<br>02 | 38 | 67.06% | 7.079<br>726 | Mbip              |
| 223921                      | 1816  | 47 | 64.65% | 7.2680<br>47 | 50 | 70.70% | 7.740<br>629 | Aaas              |
| 210766                      | 4338  | 47 | 37.53% | 3.0425<br>94 | 44 | 37.18% | 2.851<br>578 | Brcc3             |
| 338372                      | 10619 | 47 | 17.96% | 1.2429<br>39 | 43 | 14.65% | 1.138<br>432 | Map3k9            |
| 214552                      | 5504  | 47 | 29.96% | 2.3980<br>33 | 26 | 18.84% | 1.328<br>058 | Cep164            |
| 74764                       | 2322  | 47 | 57.45% | 5.6842<br>26 | 41 | 56.03% | 4.964<br>137 | Klc4              |
| 56503                       | 1778  | 47 | 65.13% | 7.4233<br>82 | 27 | 45.95% | 4.269<br>275 | Ankrd49           |
| 319262                      | 4227  | 47 | 37.43% | 3.1224<br>92 | 28 | 25.20% | 1.862<br>293 | Fchsdl            |
| 545812                      | 1807  | 47 | 32.87% | 7.3042<br>46 | 58 | 30.11% | 9.023<br>852 | Pilrb2            |
| 66320                       | 791   | 47 | 84.32% | 16.686<br>19 | 67 | 89.51% | 23.81<br>335 | Tmem20<br>8       |
| 67671                       | 387   | 47 | 20.67% | 34.105<br>36 | 49 | 32.30% | 35.59<br>649 | Rpl38             |
| 15205                       | 1487  | 47 | 38.80% | 8.8761<br>08 | 64 | 38.74% | 12.10<br>016 | Hes1              |
| 26992                       | 2370  | 47 | 18.99% | 5.5691<br>03 | 19 | 16.88% | 2.253<br>862 | Brd7              |
| 74252                       | 2955  | 47 | 31.78% | 4.4665<br>9  | 35 | 37.66% | 3.329<br>911 | Armc1             |

|                                  |       |    |        |              |    |        |              |                   |
|----------------------------------|-------|----|--------|--------------|----|--------|--------------|-------------------|
| 18764                            | 5221  | 47 | 35.36% | 2.5280<br>16 | 32 | 24.57% | 1.723<br>131 | Pkd2              |
| 329504                           | 3407  | 47 | 41.41% | 3.8740<br>16 | 44 | 36.72% | 3.630<br>803 | Lcmt2             |
| 64685                            | 1368  | 47 | 62.94% | 9.6482<br>26 | 48 | 69.37% | 9.864<br>55  | Nmi               |
| 72056                            | 1882  | 47 | 56.16% | 7.0131<br>63 | 53 | 68.33% | 7.917<br>323 | 1810055<br>G02Rik |
| gi 149269143 ref X<br>R_034253.1 | 3326  | 47 | 12.18% | 3.9683<br>62 | 36 | 10.40% | 3.043<br>003 | -                 |
| 78655                            | 2367  | 47 | 14.87% | 5.5761<br>61 | 77 | 14.79% | 9.145<br>65  | Eif3j             |
| 269397                           | 4395  | 47 | 40.20% | 3.0031<br>34 | 22 | 17.50% | 1.407<br>298 | Ss1811            |
| 269878                           | 10040 | 47 | 17.33% | 1.3146<br>19 | 38 | 15.10% | 1.064<br>074 | Megf8             |
| 70617                            | 1603  | 47 | 56.33% | 8.2337<br>95 | 49 | 64.69% | 8.593<br>789 | 5730508<br>B09Rik |
| 72157                            | 2334  | 47 | 57.63% | 5.6550<br>01 | 35 | 48.76% | 4.215<br>89  | Pgm2              |
| 233073                           | 864   | 47 | 87.50% | 15.276<br>36 | 45 | 85.88% | 14.64<br>269 | U2af114           |
| 21341                            | 3255  | 47 | 47.93% | 4.0549<br>23 | 51 | 46.79% | 4.404<br>953 | Taf1c             |
| 22194                            | 1386  | 47 | 40.98% | 9.5229<br>24 | 30 | 34.56% | 6.085<br>274 | Ube2e1            |
| 1E+08                            | 1701  | 47 | 7.76%  | 7.7594<br>2  | 45 | 10.88% | 7.437<br>557 | Gm4418            |
| 67053                            | 2467  | 47 | 49.45% | 5.3501<br>31 | 34 | 43.70% | 3.874<br>645 | Rpp14             |
| 380629                           | 3667  | 47 | 14.32% | 3.5993<br>38 | 23 | 12.35% | 1.763<br>352 | Heca              |
| gi 144922713 ref N<br>M_026409.3 | 2077  | 47 | 59.70% | 6.3547<br>3  | 25 | 35.63% | 3.383<br>963 | -                 |
| 101095                           | 5222  | 47 | 33%    | 2.5275<br>32 | 27 | 21.16% | 1.453<br>614 | Zfp282            |
| 71707                            | 2970  | 46 | 47.51% | 4.3494<br>78 | 19 | 27.07% | 1.798<br>537 | Ubiad1            |
| 214444                           | 5603  | 46 | 31.04% | 2.3055<br>41 | 33 | 22.90% | 1.655<br>829 | Cdk5rap<br>2      |
| 236539                           | 1871  | 46 | 33.62% | 6.9043<br>02 | 49 | 37.04% | 7.362<br>824 | Phgdh             |
| 213439                           | 5211  | 46 | 31.11% | 2.4789<br>77 | 13 | 10.38% | 0.701<br>365 | Gpr174            |

|                                  |      |    |        |              |    |        |              |              |
|----------------------------------|------|----|--------|--------------|----|--------|--------------|--------------|
| 218343                           | 5381 | 46 | 31.39% | 2.4006<br>59 | 22 | 17.86% | 1.149<br>428 | Ttc37        |
| 12856                            | 436  | 46 | 63.99% | 29.628<br>32 | 27 | 62.16% | 17.41<br>002 | Cox17        |
| 232086                           | 1510 | 46 | 74.57% | 8.5549<br>33 | 36 | 53.91% | 6.702<br>667 | Tmem15<br>0a |
| 1E+08                            | 4150 | 46 | 33.13% | 3.1127<br>59 | 19 | 14.67% | 1.287<br>145 | Gm2179       |
| 210529                           | 2625 | 46 | 52.04% | 4.9211<br>23 | 41 | 47.89% | 4.391<br>134 | Mettl14      |
| 338362                           | 4284 | 46 | 35.83% | 3.0153<br>94 | 59 | 44.07% | 3.871<br>905 | Ust          |
| 619605                           | 1411 | 46 | 72.64% | 9.1551<br>72 | 35 | 70.80% | 6.973<br>698 | Zcchc17      |
| 26407                            | 5305 | 46 | 29.56% | 2.4350<br>52 | 41 | 28.09% | 2.172<br>804 | Map3k4       |
| 24075                            | 787  | 46 | 66.07% | 16.414<br>17 | 49 | 70.39% | 17.50<br>425 | Taf10        |
| 69792                            | 1019 | 46 | 81.65% | 12.677<br>08 | 56 | 91.36% | 15.45<br>027 | Med6         |
| 230393                           | 5796 | 46 | 23.05% | 2.2287<br>7  | 51 | 21.34% | 2.473<br>796 | BC0570<br>79 |
| 27965                            | 2690 | 46 | 14.65% | 4.8022<br>11 | 54 | 17.99% | 5.643<br>696 | Spg21        |
| 19210                            | 3424 | 46 | 20.44% | 3.7727<br>65 | 66 | 26.14% | 5.419<br>164 | Ptdss1       |
| 76561                            | 2171 | 46 | 50.76% | 5.9502<br>3  | 35 | 45.65% | 4.532<br>422 | Snx7         |
| 68267                            | 2805 | 46 | 46.81% | 4.6053<br>29 | 39 | 45.45% | 3.908<br>894 | Slc25a22     |
| gi 225690605 ref N<br>M_175025.3 | 4873 | 46 | 20.46% | 2.6509<br>23 | 38 | 16.85% | 2.192<br>347 | -            |
| 67239                            | 1830 | 46 | 48.69% | 7.0589<br>88 | 41 | 44.10% | 6.298<br>757 | Rpf2         |
| 57782                            | 3446 | 46 | 44.31% | 3.7486<br>79 | 30 | 30.56% | 2.447<br>53  | Rbak         |
| 12367                            | 1466 | 46 | 63.71% | 8.8116<br>97 | 32 | 64.67% | 6.136<br>746 | Casp3        |
| 110821                           | 2603 | 46 | 56.97% | 4.9627<br>15 | 50 | 54.25% | 5.400<br>301 | Pcca         |
| 68776                            | 1220 | 46 | 77.38% | 10.588<br>48 | 47 | 72.05% | 10.83<br>079 | Taf11        |
| gi 118129929 ref N<br>M_010148.2 | 4209 | 46 | 38.16% | 3.0691<br>25 | 29 | 24.97% | 1.937<br>052 | -            |

|                                  |      |    |        |              |    |        |              |             |
|----------------------------------|------|----|--------|--------------|----|--------|--------------|-------------|
| 66704                            | 1840 | 46 | 57.12% | 7.0206<br>24 | 56 | 58.04% | 8.556<br>424 | Rbm4b       |
| 229615                           | 2975 | 46 | 43.53% | 4.3421<br>67 | 21 | 25.98% | 1.984<br>515 | Pias3       |
| 68897                            | 5030 | 46 | 32.84% | 2.5681<br>81 | 25 | 20.46% | 1.397<br>314 | Disp1       |
| 72462                            | 4809 | 46 | 34.83% | 2.6862<br>03 | 28 | 21.17% | 1.636<br>912 | Rrp1b       |
| 74268                            | 1432 | 46 | 61.31% | 9.0209<br>14 | 39 | 62.57% | 7.656<br>737 | Aven        |
| 69288                            | 4329 | 46 | 36.59% | 2.9840<br>49 | 27 | 24.79% | 1.753<br>47  | Rhobtb1     |
| 268481                           | 2735 | 46 | 52.91% | 4.7231<br>99 | 18 | 20.40% | 1.850<br>279 | Krt222      |
| gi 149257652 ref X<br>M_992714.2 | 3618 | 46 | 39%    | 3.5704<br>67 | 25 | 25.21% | 1.942<br>646 | -           |
| 319899                           | 6577 | 46 | 30.17% | 1.9641<br>1  | 23 | 13.38% | 0.983<br>155 | Dock6       |
| 70456                            | 854  | 46 | 89.58% | 15.126<br>4  | 68 | 90.98% | 22.38<br>583 | Mpc2        |
| 212442                           | 1889 | 46 | 60.93% | 6.8385<br>12 | 38 | 48.81% | 5.655<br>536 | Lactb2      |
| 72113                            | 2287 | 46 | 49.19% | 5.6484<br>25 | 22 | 39.92% | 2.704<br>448 | Adck1       |
| 70020                            | 1038 | 46 | 75.24% | 12.445<br>04 | 36 | 74.66% | 9.750<br>508 | Ino80b      |
| 217366                           | 2476 | 46 | 55.09% | 5.2172<br>65 | 24 | 34.09% | 2.725<br>102 | Lrrc45      |
| 235406                           | 4564 | 46 | 34.68% | 2.8304<br>01 | 37 | 26.18% | 2.279<br>178 | Snx33       |
| 56441                            | 2020 | 46 | 55.20% | 6.3950<br>24 | 45 | 54.75% | 6.263<br>012 | Nat6        |
| 233806                           | 1427 | 46 | 61.39% | 9.0525<br>22 | 57 | 73.65% | 11.22<br>983 | Tmem15<br>9 |
| 16998                            | 5209 | 46 | 31.71% | 2.4799<br>29 | 66 | 39.18% | 3.562<br>146 | Ltbp3       |
| 76933                            | 481  | 45 | 86.69% | 26.272<br>61 | 93 | 89.40% | 54.35<br>756 | Ifi2712a    |
| 50884                            | 3387 | 45 | 44.05% | 3.7310<br>67 | 18 | 23.29% | 1.494<br>099 | Nckap1      |
| 69737                            | 4562 | 45 | 32.38% | 2.7700<br>84 | 57 | 37.94% | 3.512<br>705 | Ttl         |
| gi 21644576 ref N<br>M_145215.1  | 1505 | 45 | 61.73% | 8.3967<br>6  | 44 | 55.68% | 8.219<br>366 | -           |

|        |      |    |        |              |    |        |              |                   |
|--------|------|----|--------|--------------|----|--------|--------------|-------------------|
| 18970  | 1227 | 45 | 75.47% | 10.299<br>2  | 67 | 88.26% | 15.35<br>155 | Polb              |
| 11677  | 1402 | 45 | 27.75% | 9.0136<br>4  | 49 | 26.18% | 9.825<br>851 | Akr1b3            |
| 218734 | 2477 | 45 | 57.09% | 5.1017<br>86 | 59 | 50.99% | 6.696<br>504 | 3830406<br>C13Rik |
| 70227  | 5978 | 45 | 21.16% | 2.1139<br>38 | 42 | 13.37% | 1.975<br>22  | Zfp619            |
| 16428  | 4284 | 45 | 33.85% | 2.9498<br>42 | 4  | 4.58%  | 0.262<br>502 | Itk               |
| 268291 | 2873 | 45 | 43.30% | 4.3985<br>81 | 20 | 23.60% | 1.957<br>116 | Rnf217            |
| 20892  | 655  | 45 | 82.29% | 19.293<br>32 | 49 | 85.80% | 21.03<br>182 | Stra13            |
| 20444  | 4470 | 45 | 35.59% | 2.8270<br>97 | 43 | 34.85% | 2.704<br>475 | St3gal2           |
| 72119  | 4365 | 45 | 27.06% | 2.8951<br>03 | 32 | 24.26% | 2.061<br>047 | Tpx2              |
| 67903  | 1632 | 45 | 62.50% | 7.7433<br>35 | 45 | 66.48% | 7.752<br>013 | Gipc1             |
| 27055  | 3011 | 45 | 46.53% | 4.1969<br>85 | 44 | 53.17% | 4.108<br>318 | Fkbp9             |
| 210009 | 3692 | 45 | 37.57% | 3.4228<br>39 | 32 | 33.56% | 2.436<br>747 | Mtrr              |
| 382073 | 1175 | 45 | 62.81% | 10.755       | 33 | 53.28% | 7.895<br>837 | Ccdc84            |
| 66126  | 1091 | 45 | 66.36% | 11.583<br>06 | 51 | 77.18% | 13.14<br>218 | Elof1             |
| 170707 | 5766 | 45 | 17.81% | 2.1916<br>62 | 38 | 14.57% | 1.852<br>811 | Usp48             |
| 14936  | 3681 | 45 | 49.04% | 3.4330<br>68 | 25 | 26.95% | 1.909<br>397 | Gys1              |
| 99890  | 3071 | 45 | 27.94% | 4.1149<br>86 | 35 | 18.79% | 3.204<br>132 | Prmt6             |
| 66381  | 1393 | 45 | 59.30% | 9.0718<br>76 | 24 | 54.77% | 4.843<br>756 | Rnf113a<br>2      |
| 215436 | 3508 | 45 | 32.47% | 3.6023<br>73 | 47 | 30.73% | 3.766<br>694 | Slc35e3           |
| 66647  | 1391 | 45 | 64.56% | 9.0849<br>2  | 51 | 66.28% | 10.30<br>778 | Ndn12             |
| 72568  | 2996 | 45 | 45.43% | 4.2179<br>98 | 25 | 28.87% | 2.345<br>958 | Lin9              |
| 238831 | 2367 | 45 | 59.91% | 5.3388<br>78 | 44 | 47.19% | 5.226<br>086 | Ppwd1             |

|                                  |      |    |        |              |     |        |              |          |
|----------------------------------|------|----|--------|--------------|-----|--------|--------------|----------|
| 246730                           | 1889 | 45 | 38.75% | 6.6898<br>48 | 58  | 43.14% | 8.632<br>134 | Oas1a    |
| 56708                            | 818  | 45 | 87.41% | 15.448<br>81 | 49  | 85.70% | 16.84<br>088 | Clcf1    |
| 320609                           | 5370 | 45 | 30.71% | 2.3532<br>82 | 20  | 15.77% | 1.047<br>075 | Fam40b   |
| 268857                           | 4080 | 45 | 24.14% | 3.0973<br>34 | 34  | 22.23% | 2.342<br>831 | Nlrc3    |
| 50753                            | 3527 | 45 | 32.52% | 3.5829<br>67 | 19  | 22.17% | 1.514<br>503 | Fbxo8    |
| gi 141802638 ref N<br>M_176833.3 | 4781 | 45 | 36.21% | 2.6431<br>97 | 24  | 23.03% | 1.411<br>285 | -        |
| 99010                            | 1920 | 45 | 60.99% | 6.5818<br>35 | 18  | 35.52% | 2.635<br>684 | Lpcat4   |
| 76457                            | 2073 | 45 | 61.79% | 6.0960<br>56 | 29  | 42.79% | 3.932<br>972 | Ccdc134  |
| 67547                            | 3533 | 45 | 39.48% | 3.5768<br>82 | 35  | 32.07% | 2.785<br>137 | Slc39a8  |
| gi 21703809 ref N<br>M_145405.1  | 629  | 45 | 86.49% | 20.090<br>82 | 40  | 84.90% | 17.87<br>852 | -        |
| 13655                            | 1416 | 45 | 74.51% | 8.9245<br>22 | 22  | 44.35% | 4.367<br>989 | Egr3     |
| 208884                           | 2995 | 45 | 16.13% | 4.2194<br>07 | 40  | 15.56% | 3.754<br>787 | Zdhhc9   |
| 320292                           | 2996 | 45 | 6.11%  | 4.2179<br>98 | 45  | 6.07%  | 4.222<br>725 | Rasgef1b |
| 319945                           | 2223 | 45 | 53.35% | 5.6847<br>16 | 23  | 36.71% | 2.908<br>777 | Flad1    |
| 94063                            | 1134 | 45 | 73.28% | 11.143<br>85 | 51  | 64.46% | 12.64<br>385 | Mrpl16   |
| 56077                            | 5208 | 45 | 27.40% | 2.4264<br>83 | 21  | 16.38% | 1.133<br>628 | Dgke     |
| 66223                            | 3695 | 45 | 25.76% | 3.4200<br>6  | 49  | 28.66% | 3.728<br>239 | Mrpl35   |
| 76184                            | 5240 | 45 | 31.77% | 2.4116<br>65 | 48  | 37.46% | 2.575<br>325 | Abca6    |
| 215160                           | 4171 | 45 | 35.82% | 3.0297<br>59 | 28  | 24.09% | 1.887<br>296 | Rhbdd2   |
| 76408                            | 5002 | 45 | 33.35% | 2.5264<br>14 | 90  | 53.24% | 5.058<br>491 | Abcc3    |
| 73822                            | 1702 | 45 | 66.75% | 7.4248<br>67 | 22  | 45.53% | 3.634<br>003 | Mfsd12   |
| 15957                            | 2638 | 45 | 55.16% | 4.7904<br>18 | 139 | 83.28% | 14.81<br>365 | Ifit1    |

|        |      |    |        |              |    |        |              |                   |
|--------|------|----|--------|--------------|----|--------|--------------|-------------------|
| 68730  | 1909 | 45 | 58.77% | 6.6197<br>61 | 44 | 59.19% | 6.479<br>908 | Dus11             |
| 66911  | 1269 | 45 | 66.59% | 9.9583<br>32 | 34 | 67.30% | 7.532<br>505 | Nudt16l1          |
| 226153 | 3515 | 45 | 41.96% | 3.5951<br>99 | 18 | 19.54% | 1.439<br>691 | Peo1              |
| 211896 | 1734 | 45 | 66.55% | 7.2878<br>45 | 53 | 68.74% | 8.593<br>081 | Depdc7            |
| 22591  | 3634 | 44 | 40.09% | 3.4001<br>92 | 28 | 23.61% | 2.166<br>183 | Xpc               |
| 170741 | 1020 | 44 | 29.22% | 12.114<br>02 | 65 | 28.53% | 17.91<br>576 | Pilrb1            |
| 242691 | 2003 | 44 | 45.78% | 6.1688<br>96 | 71 | 57.61% | 9.965<br>51  | Gpatch3           |
| 16560  | 8257 | 44 | 19.93% | 1.4964<br>63 | 30 | 13.50% | 1.021<br>459 | Kif1a             |
| 20680  | 3266 | 44 | 41.95% | 3.7833<br>12 | 39 | 40.54% | 3.357<br>148 | Sox7              |
| 78878  | 4387 | 44 | 28.47% | 2.8165<br>71 | 16 | 12.01% | 1.025<br>356 | B230206<br>F22Rik |
| 53325  | 5455 | 44 | 24.14% | 2.2651<br>33 | 35 | 20.33% | 1.803<br>829 | Banp              |
| 74168  | 1838 | 44 | 47.33% | 6.7226<br>87 | 40 | 46.52% | 6.118<br>382 | Zdhhc16           |
| 214763 | 4000 | 44 | 31.40% | 3.0890<br>75 | 53 | 34.43% | 3.725<br>101 | Mb21d1            |
| 15567  | 2747 | 44 | 45.69% | 4.4981<br>06 | 2  | 1.97%  | 0.204<br>689 | Slc6a4            |
| 68080  | 1425 | 44 | 66.25% | 8.6710<br>87 | 35 | 61.75% | 6.905<br>185 | Gpn3              |
| 110175 | 1362 | 44 | 58.08% | 9.0721<br>72 | 89 | 65.05% | 18.37<br>109 | Ggct              |
| 69870  | 1402 | 44 | 68.47% | 8.8133<br>37 | 29 | 54.28% | 5.815<br>3   | Polr3gl           |
| 18700  | 3593 | 44 | 39.13% | 3.4389<br>92 | 18 | 17.95% | 1.408<br>437 | Piga              |
| 56177  | 2727 | 44 | 45.95% | 4.5310<br>96 | 55 | 50.02% | 5.670<br>217 | Olfm1             |
| 70225  | 1292 | 44 | 39.94% | 9.5636<br>98 | 32 | 31.81% | 6.963<br>211 | Ppil3             |
| 13008  | 889  | 44 | 81.33% | 13.899<br>1  | 52 | 85.04% | 16.44<br>461 | Csrp2             |
| 72244  | 3357 | 44 | 32.89% | 3.6807<br>56 | 54 | 41.61% | 4.522<br>354 | 1600014<br>C10Rik |

|                                 |      |    |        |              |    |        |              |                   |
|---------------------------------|------|----|--------|--------------|----|--------|--------------|-------------------|
| 54160                           | 3200 | 44 | 45.50% | 3.8613<br>43 | 52 | 50.03% | 4.568<br>519 | Copg2             |
| 58861                           | 2754 | 44 | 43.32% | 4.4866<br>73 | 60 | 61.26% | 6.125<br>047 | Cysltrl           |
| 229600                          | 447  | 44 | 91.28% | 27.642<br>73 | 47 | 95.97% | 29.56<br>055 | BC0285<br>28      |
| 77877                           | 3974 | 44 | 38.45% | 3.1092<br>85 | 32 | 30.05% | 2.263<br>832 | 6030458<br>C11Rik |
| 27015                           | 4226 | 44 | 29.51% | 2.9238<br>76 | 31 | 25.79% | 2.062<br>312 | Polk              |
| 108115                          | 3100 | 44 | 49.19% | 3.9859<br>03 | 26 | 24.03% | 2.357<br>946 | Slco4a1           |
| 18019                           | 6660 | 44 | 26.47% | 1.8553       | 14 | 8.86%  | 0.590<br>984 | Nfatc2            |
| 77605                           | 1636 | 44 | 44.25% | 7.5527<br>5  | 50 | 47.92% | 8.592<br>288 | H2afv             |
| 108089                          | 5163 | 44 | 33.18% | 2.3932<br>4  | 8  | 7.59%  | 0.435<br>622 | Rnf144a           |
| 22757                           | 3829 | 44 | 40.82% | 3.2270<br>3  | 30 | 27.08% | 2.202<br>713 | Zkscan5           |
| 20822                           | 8736 | 44 | 21.77% | 1.4144<br>11 | 38 | 19.32% | 1.222<br>906 | Trove2            |
| 102093                          | 4640 | 44 | 35.99% | 2.6629<br>95 | 37 | 30.45% | 2.241<br>846 | Phkb              |
| 108755                          | 1344 | 44 | 70.98% | 9.1936<br>74 | 23 | 54.17% | 4.811<br>17  | Lymr2             |
| 238693                          | 2365 | 44 | 46.89% | 5.2246<br>5  | 29 | 44.27% | 3.447<br>379 | Zfp58             |
| 78834                           | 2486 | 44 | 51.69% | 4.9703<br>53 | 43 | 50.36% | 4.862<br>834 | Zfp623            |
| 56484                           | 2889 | 44 | 42.85% | 4.2770<br>16 | 29 | 39.49% | 2.822<br>101 | Foxo3             |
| 66559                           | 1259 | 44 | 72.68% | 9.8143<br>75 | 40 | 65.29% | 8.932<br>158 | Metap1d           |
| 57230                           | 2086 | 44 | 43.96% | 5.9234<br>41 | 34 | 39.41% | 4.582<br>334 | Sap30bp           |
| gi 142381159 ref NM_001033134.2 | 1485 | 44 | 69.16% | 8.3207<br>4  | 27 | 44.85% | 5.111<br>63  | -                 |
| gi 124487212 ref NM_001081154.1 | 6398 | 44 | 13.30% | 1.9312<br>75 | 33 | 12%    | 1.450<br>08  | -                 |
| 217149                          | 750  | 44 | 83.60% | 16.475<br>06 | 38 | 80.93% | 14.24<br>441 | Cisd3             |
| 64704                           | 1739 | 44 | 56.47% | 7.1054<br>04 | 53 | 55.55% | 8.568<br>374 | Htra2             |



|        |      |    |        |              |    |        |              |                   |
|--------|------|----|--------|--------------|----|--------|--------------|-------------------|
| 68729  | 5649 | 44 | 26.62% | 2.1873<br>43 | 33 | 22.11% | 1.642<br>345 | Trim37            |
| 224585 | 3809 | 44 | 36.81% | 3.2439<br>74 | 27 | 30.03% | 1.992<br>851 | Zfp160            |
| 69893  | 2876 | 44 | 51.43% | 4.2963<br>49 | 40 | 45.83% | 3.910<br>148 | Selrc1            |
| 1E+08  | 1770 | 44 | 43.90% | 6.9809<br>6  | 20 | 30.45% | 3.176<br>719 | Gm4492            |
| 68366  | 2259 | 43 | 61.84% | 5.3454<br>95 | 28 | 48.03% | 3.484<br>688 | Tmem12<br>9       |
| 102644 | 2388 | 43 | 38.48% | 5.0567<br>31 | 45 | 47.53% | 5.297<br>858 | Oaf               |
| 101488 | 4381 | 43 | 33.49% | 2.7563<br>28 | 13 | 12.46% | 0.834<br>242 | Slco2b1           |
| 380601 | 3164 | 43 | 44.03% | 3.8165<br>21 | 31 | 35.62% | 2.754<br>529 | Fastkd5           |
| 218629 | 4098 | 43 | 36.19% | 2.9466<br>75 | 39 | 33.04% | 2.675<br>56  | Dhx29             |
| 105827 | 3214 | 43 | 46.20% | 3.7571<br>48 | 24 | 29.93% | 2.099<br>363 | Amigo2            |
| 66350  | 1541 | 43 | 61.19% | 7.8361<br>28 | 28 | 55.16% | 5.108<br>313 | Pla2g12a          |
| 74114  | 2803 | 43 | 52.05% | 4.3080<br>53 | 41 | 47.27% | 4.112<br>282 | Crot              |
| 140795 | 1844 | 43 | 50.49% | 6.5485<br>21 | 43 | 48.26% | 6.555<br>86  | P2ry14            |
| 71787  | 1146 | 43 | 73.65% | 10.537<br>06 | 34 | 70.24% | 8.340<br>967 | Trnau1a<br>p      |
| 66602  | 1564 | 43 | 57.61% | 7.7208<br>91 | 23 | 49.62% | 4.134<br>407 | 1700020<br>I14Rik |
| 78309  | 7818 | 43 | 21.28% | 1.5445<br>73 | 40 | 20.89% | 1.438<br>422 | Cul9              |
| 68147  | 1271 | 43 | 39.97% | 9.5007<br>66 | 67 | 54.92% | 14.82<br>011 | Gar1              |
| 230119 | 5632 | 43 | 28.78% | 2.1440<br>83 | 22 | 15.50% | 1.098<br>202 | Zbtb5             |
| 213056 | 8695 | 43 | 20.79% | 1.3887<br>84 | 18 | 9.50%  | 0.582<br>003 | Fam126b           |
| 94066  | 917  | 43 | 79.83% | 13.168<br>46 | 46 | 75.68% | 14.10<br>297 | Mrpl36            |
| 72137  | 2109 | 43 | 59.17% | 5.7256<br>87 | 41 | 47.98% | 5.465<br>494 | Wdsub1            |
| 66086  | 1438 | 43 | 69.96% | 8.3974<br>08 | 37 | 57.72% | 7.233<br>774 | Fopnl             |

|                                     |       |    |        |              |    |        |              |         |
|-------------------------------------|-------|----|--------|--------------|----|--------|--------------|---------|
| 244421                              | 3930  | 43 | 24.40% | 3.0726<br>4  | 34 | 19.06% | 2.432<br>252 | Lonrf1  |
| 93697                               | 4070  | 43 | 37.49% | 2.9669<br>47 | 22 | 22.46% | 1.519<br>674 | Narg2   |
| 211986                              | 2971  | 43 | 44.97% | 4.0644<br>47 | 31 | 37.39% | 2.933<br>467 | Tmem18  |
| gi 149267808 ref X<br>M_001477204.1 | 5621  | 43 | 23.87% | 2.1482<br>78 | 40 | 22.42% | 2.000<br>638 | -       |
| gi 54292134 ref N<br>M_001005847.1  | 1266  | 43 | 64.53% | 9.5382<br>89 | 45 | 67.93% | 9.993<br>116 | -       |
| 211255                              | 4529  | 43 | 34.05% | 2.6662<br>56 | 35 | 27.16% | 2.172<br>64  | Kbtbd7  |
| 227326                              | 2550  | 43 | 58.98% | 4.7354<br>8  | 19 | 27.80% | 2.094<br>766 | Gpr55   |
| 19300                               | 2527  | 43 | 39.81% | 4.7785<br>81 | 34 | 43.02% | 3.782<br>647 | Abcd4   |
| gi 149252469 ref X<br>M_001473943.1 | 3440  | 43 | 37.30% | 3.5103<br>12 | 40 | 33.66% | 3.269<br>066 | -       |
| 268752                              | 2011  | 43 | 61.96% | 6.0047<br>11 | 16 | 32.02% | 2.236<br>815 | Wdfy2   |
| 100210                              | 1356  | 43 | 53.02% | 8.9052<br>16 | 37 | 55.68% | 7.671<br>215 | Gpn2    |
| 231999                              | 6723  | 43 | 26.48% | 1.7961<br>44 | 28 | 18.52% | 1.170<br>893 | Plekha8 |
| 17295                               | 6652  | 43 | 26.97% | 1.8153<br>15 | 26 | 16.72% | 1.098<br>862 | Met     |
| 75627                               | 2125  | 43 | 63.15% | 5.6825<br>76 | 31 | 44.28% | 4.101<br>332 | Snapc1  |
| 59047                               | 2099  | 43 | 47.45% | 5.7529<br>65 | 39 | 53.07% | 5.223<br>653 | Pnkp    |
| 71966                               | 2013  | 43 | 29.76% | 5.9987<br>45 | 35 | 27.87% | 4.888<br>171 | Nkiras2 |
| 75957                               | 2339  | 43 | 47.84% | 5.1626<br>65 | 58 | 64.99% | 6.971<br>398 | Mirl7hg |
| 72522                               | 3011  | 43 | 46.46% | 4.0104<br>53 | 37 | 38.39% | 3.454<br>722 | Atxn7l2 |
| 69684                               | 1346  | 43 | 78.68% | 8.9713<br>77 | 27 | 58.25% | 5.639<br>503 | Aarsd1  |
| 19043                               | 3280  | 43 | 15.70% | 3.6815<br>47 | 44 | 16.19% | 3.771<br>386 | Ppm1b   |
| 59030                               | 3215  | 43 | 32.94% | 3.7559<br>79 | 54 | 41.84% | 4.722<br>097 | Mkks    |
| 20190                               | 15362 | 43 | 5.74%  | 0.7860<br>61 | 41 | 4.97%  | 0.750<br>34  | Ryr1    |

|        |       |    |        |              |    |        |              |                   |
|--------|-------|----|--------|--------------|----|--------|--------------|-------------------|
| 381598 | 4009  | 43 | 23.97% | 3.0120<br>91 | 24 | 21.08% | 1.683<br>051 | 2610005<br>L07Rik |
| 69456  | 1550  | 43 | 65.03% | 7.7906<br>28 | 34 | 60.84% | 6.166<br>935 | CommD1<br>0       |
| 319162 | 1990  | 43 | 48.34% | 6.0680<br>77 | 26 | 34.72% | 3.673<br>182 | Hist3h2a          |
| 218699 | 2840  | 43 | 14.47% | 4.2519<br>27 | 51 | 14.05% | 5.048<br>635 | Pxk               |
| 17535  | 3034  | 43 | 52.34% | 3.9800<br>51 | 26 | 29.93% | 2.409<br>239 | Mre11a            |
| 66948  | 2865  | 43 | 41.15% | 4.2148<br>25 | 33 | 37.63% | 3.238<br>258 | Acad8             |
| 13178  | 3057  | 43 | 38.76% | 3.9501<br>06 | 59 | 48.09% | 5.425<br>986 | Dck               |
| 64933  | 3467  | 43 | 44.79% | 3.4829<br>75 | 28 | 36.20% | 2.270<br>525 | Ap3m2             |
| 18203  | 1175  | 43 | 75.15% | 10.277       | 43 | 72.34% | 10.28<br>852 | Ntan1             |
| 68040  | 1991  | 43 | 61.13% | 6.0650<br>29 | 31 | 53.09% | 4.377<br>363 | Zfp593            |
| 52377  | 1453  | 43 | 68.13% | 8.3107<br>18 | 27 | 51%    | 5.224<br>206 | Rcn3              |
| 13000  | 3766  | 43 | 18.99% | 3.2064<br>45 | 57 | 14.74% | 4.255<br>167 | Csnk2a2           |
| 170833 | 2617  | 43 | 48.41% | 4.6142<br>43 | 28 | 37.56% | 3.007<br>99  | Hook2             |
| 15078  | 1076  | 43 | 7.90%  | 11.222<br>56 | 38 | 6.78%  | 9.928<br>724 | H3f3a             |
| 14548  | 1061  | 43 | 51.18% | 11.381<br>22 | 65 | 61.17% | 17.22<br>345 | Mrps33            |
| 17685  | 3056  | 43 | 42.93% | 3.9513<br>98 | 22 | 30.40% | 2.023<br>911 | Msh2              |
| 107684 | 4112  | 43 | 38.76% | 2.9366<br>42 | 25 | 23.08% | 1.709<br>264 | Coro2a            |
| 319625 | 2245  | 43 | 51.45% | 5.3788<br>3  | 29 | 44.28% | 3.631<br>648 | Galm              |
| 12460  | 1057  | 43 | 72.66% | 11.424<br>29 | 39 | 66.70% | 10.37<br>318 | Ccs               |
| 226757 | 7063  | 43 | 10.38% | 1.7096<br>81 | 29 | 9.09%  | 1.154<br>332 | Wdr26             |
| 16993  | 2066  | 43 | 30.69% | 5.8448<br>56 | 34 | 28.56% | 4.626<br>693 | Lta4h             |
| 94040  | 11962 | 42 | 15.21% | 0.9860<br>1  | 39 | 13.18% | 0.916<br>606 | Clmn              |

|                              |      |    |        |              |    |        |              |                   |
|------------------------------|------|----|--------|--------------|----|--------|--------------|-------------------|
| gi 149251749 ref XR_032583.1 | 1812 | 42 | 36.81% | 6.5091<br>88 | 27 | 33.72% | 4.189<br>167 | -                 |
| 78506                        | 3268 | 42 | 43.76% | 3.6091<br>34 | 27 | 28.24% | 2.322<br>757 | Efha2             |
| 66662                        | 2355 | 42 | 10.87% | 5.0083<br>43 | 50 | 7.43%  | 5.968<br>995 | 5730577<br>I03Rik |
| gi 118200357 ref NM_153163.3 | 4783 | 42 | 31.19% | 2.4659<br>52 | 38 | 28.73% | 2.233<br>6   | -                 |
| 408068                       | 4523 | 42 | 32.61% | 2.6077<br>05 | 28 | 24.39% | 1.740<br>418 | Zfp738            |
| 319765                       | 3902 | 42 | 35.73% | 3.0227<br>19 | 19 | 17.58% | 1.368<br>953 | Igf2bp2           |
| 13852                        | 2937 | 42 | 32.62% | 4.0158<br>83 | 21 | 23.26% | 2.010<br>192 | Stx2              |
| 76265                        | 1972 | 42 | 69.32% | 5.9810<br>59 | 24 | 45.39% | 3.421<br>578 | Tsen54            |
| 213484                       | 3716 | 42 | 27.05% | 3.1740<br>17 | 19 | 15.42% | 1.437<br>474 | Nudt18            |
| 233876                       | 2511 | 42 | 49.98% | 4.6971<br>92 | 21 | 33.89% | 2.351<br>228 | Hirip3            |
| 66296                        | 2375 | 42 | 48.88% | 4.9661<br>68 | 28 | 43.49% | 3.314<br>489 | Haus2             |
| 66606                        | 1982 | 42 | 62.76% | 5.9508<br>82 | 43 | 61.50% | 6.099<br>397 | Lrrc57            |
| 69802                        | 2259 | 42 | 52.99% | 5.2211<br>81 | 23 | 37.80% | 2.862<br>422 | Cox11             |
| 103733                       | 1609 | 42 | 66.81% | 7.3304<br>22 | 23 | 42.14% | 4.018<br>777 | Tubg1             |
| 208198                       | 3026 | 42 | 41.97% | 3.8977<br>69 | 49 | 49.17% | 4.552<br>493 | Btbd2             |
| 69878                        | 869  | 42 | 27.27% | 13.572<br>67 | 36 | 20.14% | 11.64<br>675 | Snrpf             |
| 71776                        | 1840 | 42 | 55.16% | 6.4101<br>35 | 40 | 51.09% | 6.111<br>732 | Tha1              |
| 106248                       | 2838 | 42 | 44.71% | 4.1559<br>72 | 30 | 38.76% | 2.971<br>878 | Qtrtd1            |
| 230657                       | 2409 | 42 | 46.33% | 4.8960<br>77 | 44 | 48.69% | 5.134<br>971 | Tmem69            |
| 225995                       | 1631 | 42 | 68.36% | 7.2315<br>44 | 52 | 68.79% | 8.963<br>374 | D030056<br>L22Rik |
| 320586                       | 2131 | 42 | 24.35% | 5.5347<br>95 | 36 | 24.87% | 4.749<br>426 | A630089<br>N07Rik |
| 20751                        | 1226 | 42 | 76.67% | 9.6204<br>31 | 35 | 68.35% | 8.026<br>01  | Spr               |

|                                     |      |    |        |              |    |        |              |                   |
|-------------------------------------|------|----|--------|--------------|----|--------|--------------|-------------------|
| 71508                               | 2500 | 42 | 49.24% | 4.7178<br>59 | 24 | 26.96% | 2.698<br>941 | Zfp935            |
| 235610                              | 2572 | 42 | 52.99% | 4.5857<br>89 | 33 | 43.20% | 3.607<br>157 | Atrip             |
| 218973                              | 4190 | 42 | 32.05% | 2.8149<br>52 | 33 | 26.21% | 2.214<br>226 | Wdhd1             |
| 19365                               | 1698 | 42 | 51.83% | 6.9462       | 46 | 68.79% | 7.616<br>269 | Rad52             |
| 68559                               | 1229 | 42 | 73.39% | 9.5969<br>47 | 51 | 83.56% | 11.66<br>65  | Pdrg1             |
| 18968                               | 5350 | 42 | 32.19% | 2.2046<br>07 | 36 | 26.39% | 1.891<br>781 | Pola1             |
| 22032                               | 3016 | 42 | 40.98% | 3.9106<br>92 | 43 | 37.73% | 4.008<br>291 | Traf4             |
| 209032                              | 6538 | 42 | 28.02% | 1.8040<br>15 | 39 | 24.35% | 1.677<br>034 | Zc3hav11          |
| 77034                               | 2731 | 42 | 14.54% | 4.3188<br>02 | 30 | 13.29% | 3.088<br>316 | 2510039<br>O18Rik |
| 67661                               | 5440 | 42 | 30.57% | 2.1681<br>34 | 25 | 18.36% | 1.292<br>002 | Ift172            |
| 207952                              | 3385 | 42 | 41.80% | 3.4843<br>87 | 44 | 43.99% | 3.654<br>4   | Klhl25            |
| 17035                               | 1092 | 42 | 81.41% | 10.800<br>96 | 29 | 72.07% | 7.466<br>163 | Lxn               |
| 67789                               | 1737 | 42 | 61.26% | 6.7902<br>41 | 35 | 48.30% | 5.664<br>875 | Dalrd3            |
| 83433                               | 1128 | 42 | 69.50% | 10.456<br>25 | 78 | 81.12% | 19.44<br>051 | Trem2             |
| 320394                              | 1767 | 42 | 65.65% | 6.6749<br>57 | 27 | 57.61% | 4.295<br>852 | Cenpt             |
| 244219                              | 3451 | 42 | 34.08% | 3.4177<br>48 | 32 | 33.12% | 2.606<br>917 | Zfp668            |
| 69577                               | 2362 | 42 | 51.74% | 4.9935<br>01 | 40 | 52.41% | 4.761<br>044 | Fastkd3           |
| 68927                               | 1675 | 42 | 76.78% | 7.0415<br>81 | 30 | 51.94% | 5.035<br>337 | Ptcd2             |
| 56807                               | 3307 | 42 | 42%    | 3.5665<br>7  | 20 | 22.83% | 1.700<br>27  | Scamp5            |
| 232811                              | 2240 | 42 | 56.07% | 5.2654<br>68 | 28 | 44.51% | 3.514<br>246 | Suv420h<br>2      |
| 104776                              | 3346 | 42 | 37.12% | 3.525        | 30 | 34.16% | 2.520<br>678 | Aldh6a1           |
| gi 149254468 ref X<br>M_001479832.1 | 2162 | 42 | 4.26%  | 5.4554<br>34 | 29 | 4.26%  | 3.771<br>069 | -                 |

|                                     |       |    |        |              |    |        |              |             |
|-------------------------------------|-------|----|--------|--------------|----|--------|--------------|-------------|
| 69926                               | 14889 | 42 | 11.35% | 0.7921<br>72 | 39 | 10.89% | 0.736<br>413 | Dnahc17     |
| 231670                              | 3909  | 42 | 33.72% | 3.0173<br>06 | 32 | 28.70% | 2.301<br>476 | Fbxo21      |
| 27369                               | 1110  | 42 | 75.95% | 10.625<br>81 | 32 | 56.67% | 8.104<br>927 | Dguok       |
| 14979                               | 981   | 42 | 83.89% | 12.023<br>09 | 42 | 75.43% | 12.03<br>656 | H2-Ke6      |
| 67014                               | 2159  | 42 | 49.65% | 5.4630<br>15 | 22 | 35.20% | 2.864<br>786 | Mina        |
| gi 149272385 ref X<br>M_001477651.1 | 1048  | 42 | 4.87%  | 11.254<br>44 | 59 | 4.87%  | 15.82<br>752 | -           |
| gi 149262212 ref X<br>M_001480237.1 | 2451  | 42 | 32.27% | 4.8121<br>78 | 43 | 31.70% | 4.932<br>275 | -           |
| 74648                               | 1546  | 42 | 68.63% | 7.6291<br>39 | 21 | 50.97% | 3.818<br>844 | S100pbp     |
| 109785                              | 4582  | 42 | 29.07% | 2.5741<br>27 | 20 | 19.45% | 1.227<br>148 | Pgm3        |
| 66258                               | 1196  | 42 | 60.79% | 9.8617<br>46 | 39 | 65.30% | 9.167<br>598 | Mrps17      |
| 14201                               | 1685  | 42 | 54.48% | 6.9997<br>91 | 46 | 58.40% | 7.675<br>029 | Fhl3        |
| 68038                               | 4239  | 42 | 30.50% | 2.7824<br>13 | 40 | 28.54% | 2.652<br>887 | Chid1       |
| 20425                               | 2074  | 42 | 52.70% | 5.6869<br>09 | 20 | 32.40% | 2.711<br>086 | Shmt1       |
| 74104                               | 2946  | 42 | 50.48% | 4.0036<br>15 | 26 | 32.86% | 2.481<br>205 | Abcb6       |
| 13518                               | 23319 | 42 | 7.74%  | 0.5057<br>96 | 12 | 2.50%  | 0.144<br>675 | Dst         |
| 433759                              | 1971  | 42 | 24.86% | 5.9840<br>94 | 38 | 25.47% | 5.420<br>247 | Hdac1       |
| 242474                              | 6895  | 42 | 23.90% | 1.7106<br>09 | 21 | 12.88% | 0.856<br>263 | Tmem24<br>5 |
| 67809                               | 2252  | 42 | 51.07% | 5.2374<br>1  | 53 | 63.63% | 6.616<br>52  | Fam82a2     |
| gi 142367401 ref N<br>M_029581.3    | 1967  | 42 | 56.28% | 5.9962<br>63 | 30 | 41.08% | 4.287<br>844 | -           |
| 75678                               | 2776  | 42 | 52.27% | 4.2487<br>93 | 37 | 49.10% | 3.747<br>178 | Ippk        |
| 12703                               | 1220  | 41 | 66.80% | 9.4375<br>6  | 52 | 68.77% | 11.98<br>3   | Socs1       |
| 97130                               | 5187  | 41 | 30.98% | 2.2197<br>46 | 13 | 10.89% | 0.704<br>611 | C77080      |

|        |      |    |        |              |    |        |              |                   |
|--------|------|----|--------|--------------|----|--------|--------------|-------------------|
| 101187 | 3724 | 41 | 42.72% | 3.0917<br>89 | 20 | 23.17% | 1.509<br>88  | Parp11            |
| 77974  | 1674 | 41 | 53.23% | 6.8780<br>31 | 26 | 51.14% | 4.366<br>566 | Rdh12             |
| 68999  | 2802 | 41 | 28.34% | 4.1091<br>45 | 34 | 21.77% | 3.411<br>402 | Anapc10           |
| 232430 | 2536 | 41 | 43.53% | 4.5401<br>51 | 20 | 28.19% | 2.217<br>19  | Crebl2            |
| 52892  | 4280 | 41 | 29.46% | 2.6901<br>46 | 44 | 32.92% | 2.890<br>221 | Sco1              |
| 18483  | 2651 | 41 | 53.72% | 4.3432       | 49 | 55.49% | 5.196<br>471 | Palm              |
| 16912  | 806  | 41 | 96.28% | 14.285<br>14 | 45 | 92.68% | 15.69<br>638 | Psmb9             |
| 100756 | 2790 | 41 | 43.26% | 4.1268<br>18 | 25 | 31.72% | 2.519<br>173 | Usp30             |
| 231872 | 1210 | 41 | 68.60% | 9.5155<br>57 | 36 | 80.58% | 8.364<br>486 | Aimp2             |
| 223922 | 2867 | 41 | 36.45% | 4.0159<br>83 | 25 | 30.03% | 2.451<br>514 | Atf7              |
| 52245  | 2961 | 41 | 30.23% | 3.8884<br>92 | 32 | 23.91% | 3.038<br>321 | Comm2             |
| 20520  | 3119 | 41 | 38.38% | 3.6915<br>11 | 35 | 31.26% | 3.154<br>821 | Slc22a5           |
| 1E+08  | 2603 | 41 | 27.55% | 4.4232<br>9  | 22 | 19.82% | 2.376<br>132 | Gm4354            |
| 211305 | 1485 | 41 | 62.02% | 7.7534<br>16 | 28 | 51.38% | 5.300<br>95  | Fbxw13            |
| 233276 | 3681 | 41 | 37.49% | 3.1279<br>06 | 23 | 22.79% | 1.756<br>646 | Tubgcp5           |
| 72076  | 883  | 41 | 84.03% | 13.039<br>44 | 43 | 68.06% | 13.69<br>083 | Mospd4            |
| 233987 | 2361 | 41 | 45.32% | 4.8766<br>72 | 14 | 21.90% | 1.667<br>071 | Zfp958            |
| 17876  | 2999 | 41 | 22.71% | 3.8392<br>21 | 16 | 14.97% | 1.499<br>911 | Myef2             |
| 66421  | 975  | 41 | 77.33% | 11.809<br>05 | 41 | 76.92% | 11.82<br>228 | 2410004<br>B18Rik |
| 13684  | 2882 | 41 | 8.12%  | 3.9950<br>81 | 44 | 7.91%  | 4.292<br>209 | Eif4e             |
| 68067  | 1168 | 41 | 65.15% | 9.8577<br>26 | 29 | 51.54% | 6.980<br>351 | 3010026<br>O09Rik |
| 76167  | 1133 | 41 | 65.93% | 10.162<br>24 | 50 | 88.44% | 12.40<br>687 | Snrnp35           |

|                                  |      |    |        |              |    |        |              |                   |
|----------------------------------|------|----|--------|--------------|----|--------|--------------|-------------------|
| 230996                           | 2660 | 41 | 52.93% | 4.3285<br>05 | 22 | 30.79% | 2.325<br>215 | 9430015<br>G10Rik |
| 28040                            | 2238 | 41 | 44.86% | 5.1446<br>93 | 29 | 44.15% | 3.643<br>007 | D6Wsu1<br>63e     |
| 71883                            | 1712 | 41 | 58.94% | 6.7253<br>64 | 35 | 52.04% | 5.747<br>598 | Coq2              |
| 14794                            | 1179 | 41 | 66.33% | 9.7657<br>54 | 26 | 53.69% | 6.199<br>857 | Spsb2             |
| 13177                            | 1091 | 41 | 77.82% | 10.553<br>46 | 39 | 67.92% | 10.04<br>991 | Eci1              |
| gi 120587004 ref N<br>M_021398.2 | 2591 | 41 | 55.89% | 4.4437<br>76 | 27 | 35.35% | 2.929<br>668 | -                 |
| 246257                           | 2642 | 41 | 43.34% | 4.3579<br>95 | 34 | 41.37% | 3.617<br>997 | Ovca2             |
| 12765                            | 3043 | 41 | 15.22% | 3.7837<br>08 | 30 | 14.03% | 2.771<br>669 | Cxcr2             |
| 22666                            | 3602 | 41 | 37.45% | 3.1965<br>08 | 23 | 25.04% | 1.795<br>173 | Zfp161            |
| 16865                            | 2122 | 41 | 43.73% | 5.4259<br>3  | 34 | 46.32% | 4.504<br>594 | Eif2d             |
| 72061                            | 3509 | 41 | 27.99% | 3.2812<br>26 | 31 | 24.28% | 2.483<br>707 | 2010111<br>I01Rik |
| 245828                           | 745  | 41 | 91.41% | 15.454<br>8  | 33 | 74.90% | 12.45<br>317 | Trappc1           |
| 380993                           | 4468 | 41 | 33.28% | 2.5769<br>52 | 47 | 33.33% | 2.957<br>378 | Zfat              |
| 67270                            | 666  | 41 | 70.12% | 17.288<br>02 | 54 | 78.23% | 22.79<br>511 | Mrpl42            |
| 56032                            | 1473 | 41 | 61.30% | 7.8165<br>81 | 38 | 60.96% | 7.252<br>754 | Nprl2             |
| 72008                            | 1941 | 41 | 53.12% | 5.9319<br>03 | 29 | 42.71% | 4.200<br>438 | Zfyve19           |
| 69225                            | 1382 | 41 | 63.46% | 8.3312<br>76 | 50 | 72.87% | 10.17<br>148 | Carkd             |
| 67282                            | 1048 | 41 | 72.33% | 10.986<br>47 | 44 | 64.22% | 11.80<br>357 | Ccdc53            |
| 270802                           | 3134 | 41 | 46.39% | 3.6738<br>43 | 37 | 47.93% | 3.319<br>134 | BC0484<br>03      |
| 51797                            | 2726 | 41 | 49.45% | 4.2237<br>06 | 26 | 37.45% | 2.681<br>449 | Ctps              |
| 235028                           | 3557 | 41 | 36.49% | 3.2369<br>48 | 43 | 37.48% | 3.398<br>652 | Zfp426            |
| 18577                            | 4658 | 41 | 28.15% | 2.4718<br>38 | 15 | 13.89% | 0.905<br>345 | Pde4a             |



|                                     |      |    |        |              |    |        |              |                   |
|-------------------------------------|------|----|--------|--------------|----|--------|--------------|-------------------|
| 21855                               | 1641 | 41 | 36.01% | 7.0163<br>46 | 34 | 53.32% | 5.824<br>953 | Timm17<br>b       |
| 75216                               | 4826 | 41 | 31.79% | 2.3857<br>9  | 48 | 37.32% | 2.796<br>25  | Cep128            |
| 215474                              | 5801 | 41 | 26.56% | 1.9848       | 39 | 27.08% | 1.890<br>096 | Sec22c            |
| 105083                              | 1588 | 41 | 64.67% | 7.2505<br>19 | 58 | 74.06% | 10.26<br>833 | Pelo              |
| 66359                               | 448  | 41 | 76.12% | 25.700<br>5  | 50 | 84.15% | 31.37<br>719 | Fam36a            |
| 12890                               | 4925 | 41 | 31.05% | 2.3378<br>32 | 46 | 33.64% | 2.625<br>873 | Cplx2             |
| 20527                               | 3973 | 41 | 33.78% | 2.8980<br>17 | 21 | 20.82% | 1.486<br>014 | Slc2a3            |
| 234728                              | 3577 | 41 | 40.03% | 3.2188<br>49 | 29 | 29.75% | 2.279<br>298 | Ftsjd1            |
| 23918                               | 1632 | 41 | 16.97% | 7.0550<br>39 | 53 | 17.03% | 9.130<br>148 | Impdh2            |
| 27029                               | 4324 | 41 | 34.67% | 2.6627<br>71 | 33 | 29.42% | 2.145<br>608 | Sgsh              |
| 320799                              | 4499 | 41 | 35.16% | 2.5591<br>96 | 40 | 34.76% | 2.499<br>575 | Zhx3              |
| 68964                               | 4183 | 41 | 34.64% | 2.7525<br>28 | 32 | 28.40% | 2.150<br>722 | Ctcl              |
| 72368                               | 622  | 41 | 85.05% | 18.510<br>97 | 43 | 83.76% | 19.43<br>57  | 2310045<br>N01Rik |
| 27368                               | 4407 | 41 | 33.97% | 2.6126<br>22 | 21 | 19.33% | 1.339<br>672 | Tbl2              |
| 236573                              | 3633 | 40 | 38.59% | 3.0919<br>35 | 42 | 40.90% | 3.250<br>169 | Gbp9              |
| 233056                              | 4525 | 40 | 34.72% | 2.4824<br>31 | 45 | 33.72% | 2.795<br>864 | Zfp790            |
| 21857                               | 905  | 40 | 76.24% | 12.412<br>15 | 33 | 73.26% | 10.25<br>15  | Timp1             |
| gi 149274485 ref X<br>M_001472725.1 | 428  | 40 | 92.06% | 26.245<br>32 | 22 | 79.44% | 14.45<br>11  | -                 |
| 317757                              | 1943 | 40 | 65.47% | 5.7812<br>65 | 19 | 32.89% | 2.749<br>178 | Gimap5            |
| 70789                               | 2733 | 40 | 43.69% | 4.1101<br>35 | 14 | 16.79% | 1.440<br>159 | Kynu              |
| 13864                               | 2218 | 40 | 48.33% | 5.0644<br>72 | 38 | 45%    | 4.816<br>64  | Nr2f6             |
| 664925                              | 2064 | 40 | 26.41% | 5.4423<br>44 | 45 | 20.35% | 6.129<br>498 | Gm7409            |

|                                  |      |    |        |              |    |        |              |                   |
|----------------------------------|------|----|--------|--------------|----|--------|--------------|-------------------|
| gi 76253920 ref N<br>M_139141.3  | 8796 | 40 | 20.84% | 1.2770<br>58 | 17 | 8.27%  | 0.543<br>358 | -                 |
| 100929                           | 4698 | 40 | 10.54% | 2.3910<br>17 | 31 | 7.90%  | 1.855<br>115 | Tyw1              |
| 320100                           | 2817 | 40 | 47.71% | 3.9875<br>75 | 41 | 44.91% | 4.091<br>845 | Relt              |
| 50933                            | 947  | 40 | 65.26% | 11.861<br>67 | 34 | 48.47% | 10.09<br>372 | Uchl3             |
| 217734                           | 5059 | 40 | 29.81% | 2.2203<br>99 | 38 | 27.16% | 2.111<br>743 | Pomt2             |
| 219022                           | 2403 | 40 | 32.08% | 4.6745<br>73 | 19 | 11.99% | 2.222<br>91  | Ttc5              |
| 70564                            | 1537 | 40 | 70.40% | 7.3083<br>92 | 26 | 50.55% | 4.755<br>778 | 5730469<br>M10Rik |
| 382051                           | 3514 | 40 | 44.74% | 3.1966<br>42 | 32 | 34.95% | 2.560<br>179 | Pdp2              |
| 22247                            | 3219 | 40 | 45.32% | 3.4895<br>93 | 30 | 31.28% | 2.620<br>127 | Umps              |
| 60455                            | 3480 | 40 | 37.87% | 3.2278<br>73 | 17 | 20.46% | 1.373<br>383 | Tmem8             |
| 78323                            | 3055 | 40 | 42%    | 3.6769<br>23 | 17 | 23.14% | 1.564<br>443 | 2310046<br>O06Rik |
| 72667                            | 4331 | 40 | 27.41% | 2.5936<br>27 | 27 | 18.38% | 1.752<br>66  | Zfp444            |
| 243725                           | 9547 | 40 | 17.31% | 1.1766       | 58 | 23.57% | 1.707<br>982 | Ppp1r9a           |
| 30794                            | 1189 | 40 | 71.40% | 9.4474<br>34 | 27 | 69.39% | 6.384<br>164 | Pdlim4            |
| 106947                           | 3479 | 40 | 41.99% | 3.2288<br>01 | 34 | 36.71% | 2.747<br>556 | Slc39a3           |
| 69674                            | 1671 | 40 | 29.92% | 6.7223<br>21 | 17 | 25.13% | 2.860<br>188 | Mif4gd            |
| gi 124430753 ref N<br>M_029441.2 | 2468 | 40 | 45.46% | 4.5514<br>58 | 20 | 29.09% | 2.278<br>279 | -                 |
| 20845                            | 4007 | 40 | 34.36% | 2.8033<br>44 | 33 | 34.74% | 2.315<br>35  | Star              |
| 56367                            | 1931 | 40 | 42.57% | 5.8171<br>92 | 54 | 58.93% | 7.862<br>01  | Scoc              |
| gi 40254198 ref N<br>M_153091.2  | 1974 | 40 | 58.41% | 5.6904<br>75 | 30 | 48.89% | 4.272<br>639 | -                 |
| 104923                           | 1676 | 40 | 48.63% | 6.7022<br>66 | 52 | 49.70% | 8.722<br>71  | Adi1              |
| 18041                            | 2053 | 40 | 50.46% | 5.4715<br>04 | 34 | 51.78% | 4.655<br>99  | Nfs1              |

|                                 |       |    |        |              |     |        |              |                   |
|---------------------------------|-------|----|--------|--------------|-----|--------|--------------|-------------------|
| 68533                           | 1054  | 40 | 77.51% | 10.657<br>49 | 40  | 72.39% | 10.66<br>944 | Mphosph<br>6      |
| 56316                           | 2899  | 40 | 39.84% | 3.8747<br>84 | 46  | 42.60% | 4.460<br>995 | Ggcx              |
| 72429                           | 1827  | 40 | 59.66% | 6.1483<br>3  | 28  | 47.13% | 4.308<br>654 | Dnajc25           |
| 67429                           | 3447  | 40 | 44.42% | 3.2587<br>75 | 27  | 29.13% | 2.202<br>138 | Nuded1            |
| 68611                           | 1080  | 40 | 72.78% | 10.400<br>92 | 33  | 71.67% | 8.590<br>379 | Mrpl28            |
| 18074                           | 4913  | 40 | 31.12% | 2.2863<br>83 | 28  | 21.49% | 1.602<br>261 | Nid2              |
| 319518                          | 2904  | 40 | 46.25% | 3.8681<br>12 | 16  | 20.56% | 1.548<br>979 | Pdpr              |
| 16774                           | 10343 | 40 | 16.25% | 1.0860<br>48 | 119 | 33.57% | 3.234<br>615 | Lama3             |
| 223774                          | 2131  | 40 | 54.20% | 5.2712<br>33 | 29  | 40.73% | 3.825<br>927 | Alg12             |
| 76899                           | 4421  | 40 | 28.27% | 2.5408<br>28 | 20  | 21.04% | 1.271<br>837 | Golga1            |
| 67238                           | 2348  | 40 | 46.59% | 4.7840<br>71 | 28  | 35.52% | 3.352<br>602 | 2810453<br>I06Rik |
| 110197                          | 5521  | 40 | 26.25% | 2.0345<br>95 | 68  | 39.29% | 3.462<br>687 | Dgkg              |
| 71839                           | 1982  | 40 | 60.39% | 5.6675<br>07 | 53  | 65.64% | 7.517<br>862 | Osgin1            |
| 246221                          | 1426  | 40 | 60.52% | 7.8772<br>78 | 48  | 69.14% | 9.463<br>327 | Mpst              |
| 66839                           | 2407  | 40 | 58.79% | 4.6668<br>05 | 37  | 46.53% | 4.321<br>632 | 0610009<br>O20Rik |
| 19258                           | 4707  | 40 | 30.49% | 2.3864<br>45 | 15  | 13.28% | 0.895<br>92  | Ptpn4             |
| 18117                           | 4933  | 40 | 29.33% | 2.2771<br>13 | 44  | 29.68% | 2.507<br>631 | Emc8              |
| gi 146198566 ref NM_001033257.3 | 2606  | 40 | 53.65% | 4.3104<br>37 | 33  | 41.98% | 3.560<br>095 | -                 |
| 210035                          | 6001  | 40 | 24.85% | 1.8718<br>54 | 17  | 10.66% | 0.796<br>43  | Tmem19<br>4       |
| 73132                           | 3141  | 40 | 41.39% | 3.5762<br>49 | 34  | 33.81% | 3.043<br>218 | Slc25a16          |
| 216864                          | 1550  | 40 | 64.52% | 7.2470<br>96 | 24  | 52.32% | 4.353<br>13  | Mgl2              |
| 234413                          | 2718  | 40 | 46.54% | 4.1328<br>18 | 22  | 28.15% | 2.275<br>597 | Zfp961            |

|                                  |      |    |        |              |    |        |              |                   |
|----------------------------------|------|----|--------|--------------|----|--------|--------------|-------------------|
| 223776                           | 2360 | 40 | 42.29% | 4.7597<br>45 | 21 | 26.31% | 2.501<br>666 | 1300018<br>J18Rik |
| 217882                           | 6640 | 40 | 24.52% | 1.6917<br>17 | 10 | 6.22%  | 0.423<br>403 | AW5554<br>64      |
| 17168                            | 2316 | 40 | 57.47% | 4.8501<br>72 | 23 | 35.45% | 2.791<br>974 | Npri3             |
| 21340                            | 2019 | 40 | 62.41% | 5.5636<br>45 | 28 | 48.74% | 3.898<br>916 | Taf1b             |
| 21335                            | 2637 | 40 | 42.40% | 4.2597<br>64 | 45 | 48.12% | 4.797<br>605 | Tacc3             |
| 68263                            | 1485 | 40 | 18.11% | 7.5643<br>09 | 33 | 16.90% | 6.247<br>548 | Pdhb              |
| 73062                            | 2675 | 40 | 45.38% | 4.1992<br>52 | 26 | 37.83% | 2.732<br>572 | Ppp1r16<br>a      |
| 13555                            | 2460 | 40 | 46.71% | 4.5662<br>6  | 27 | 35%    | 3.085<br>679 | E2f1              |
| gi 34328472 ref N<br>M_021312.4  | 2917 | 40 | 35.34% | 3.8508<br>74 | 27 | 33.97% | 2.602<br>253 | -                 |
| 170770                           | 1976 | 40 | 55.97% | 5.6847<br>16 | 33 | 47.32% | 4.695<br>146 | Bbc3              |
| 75695                            | 2281 | 39 | 53.66% | 4.8014<br>79 | 24 | 39.11% | 2.958<br>067 | Rilp11            |
| 52838                            | 2940 | 39 | 44.05% | 3.7252<br>29 | 31 | 34.42% | 2.964<br>398 | Dnlz              |
| gi 256355089 ref N<br>R_015465.1 | 4518 | 39 | 32.32% | 2.4241<br>2  | 37 | 31.81% | 2.302<br>383 | -                 |
| 13528                            | 2453 | 39 | 43.95% | 4.4648<br>08 | 19 | 29.39% | 2.177<br>6   | Dtnb              |
| 320910                           | 3096 | 39 | 39.73% | 3.5375<br>24 | 8  | 12.66% | 0.726<br>459 | Itgb8             |
| 74165                            | 3935 | 39 | 37.28% | 2.7832<br>72 | 38 | 36.06% | 2.714<br>945 | Fbxl22            |
| 66591                            | 1288 | 39 | 71.74% | 8.5032<br>4  | 40 | 71.66% | 8.731<br>045 | Mad211b<br>p      |
| 53893                            | 1590 | 39 | 63.21% | 6.8881<br>59 | 44 | 68.81% | 7.779<br>965 | Nudt5             |
| 71854                            | 1681 | 39 | 64.43% | 6.5152<br>73 | 30 | 46.82% | 5.017<br>365 | Dpep3             |
| 268933                           | 3099 | 39 | 43.43% | 3.5340<br>99 | 21 | 28.01% | 1.905<br>109 | Wdr24             |
| 268297                           | 4745 | 39 | 30.90% | 2.3081<br>5  | 18 | 15.57% | 1.066<br>494 | Scml4             |
| 75660                            | 998  | 39 | 77.56% | 10.974<br>12 | 32 | 70.04% | 9.014<br>498 | Lin37             |

|                                  |       |    |        |              |     |        |              |                   |
|----------------------------------|-------|----|--------|--------------|-----|--------|--------------|-------------------|
| gi 118130402 ref N<br>M_028029.2 | 4887  | 39 | 32.23% | 2.2410<br>83 | 26  | 21.28% | 1.495<br>73  | -                 |
| 227154                           | 2338  | 39 | 48.89% | 4.6844<br>2  | 34  | 49.02% | 4.088<br>43  | Stradb            |
| 70549                            | 12150 | 39 | 14.01% | 0.9014<br>13 | 125 | 37.35% | 2.892<br>383 | Tln2              |
| 209462                           | 3785  | 39 | 40.29% | 2.8935<br>73 | 32  | 32.34% | 2.376<br>874 | Hace1             |
| 66308                            | 2672  | 39 | 38.85% | 4.0988<br>67 | 27  | 24.48% | 2.840<br>857 | 2810021<br>B07Rik |
| 66596                            | 1315  | 39 | 65.48% | 8.3286<br>49 | 29  | 49.20% | 6.200<br>038 | Gtf3a             |
| 66254                            | 2545  | 39 | 48.57% | 4.3034<br>08 | 27  | 37.09% | 2.982<br>621 | Dimt1             |
| 71481                            | 4795  | 39 | 32.60% | 2.2840<br>82 | 76  | 48.32% | 4.456<br>02  | Alpk1             |
| 72886                            | 1324  | 39 | 70.77% | 8.2720<br>34 | 36  | 85.05% | 7.644<br>281 | Ccdc94            |
| 319845                           | 3438  | 39 | 38.51% | 3.1856<br>23 | 19  | 23.59% | 1.553<br>71  | Bbs9              |
| 214968                           | 6527  | 39 | 23.92% | 1.6779<br>8  | 36  | 17.71% | 1.550<br>64  | Sema6d            |
| 259277                           | 1322  | 39 | 47.28% | 8.2845<br>49 | 21  | 39.33% | 4.465<br>91  | Klk8              |
| 16145                            | 2064  | 39 | 48.89% | 5.3062<br>86 | 43  | 66.28% | 5.857<br>076 | Igtp              |
| gi 38142473 ref N<br>M_198301.1  | 1660  | 39 | 70.12% | 6.5976<br>95 | 31  | 57.95% | 5.250<br>198 | -                 |
| gi 118130222 ref N<br>M_011056.2 | 2554  | 39 | 44.44% | 4.2882<br>43 | 17  | 29.37% | 1.871<br>329 | -                 |
| 21983                            | 3618  | 39 | 38.20% | 3.0271<br>35 | 84  | 50.11% | 6.527<br>289 | Tpbg              |
| 74467                            | 3590  | 39 | 37.83% | 3.0507<br>45 | 26  | 27.35% | 2.036<br>109 | Pus10             |
| 101631                           | 2640  | 39 | 47.84% | 4.1485<br>51 | 52  | 63.41% | 5.537<br>599 | Pwwp2b            |
| 230734                           | 1558  | 39 | 36.65% | 7.0296<br>36 | 37  | 36.39% | 6.676<br>616 | Yrdc              |
| 14366                            | 3685  | 39 | 38.67% | 2.9720<br>96 | 22  | 25.26% | 1.678<br>446 | Fzd4              |
| 240328                           | 3297  | 39 | 40.10% | 3.3218<br>6  | 38  | 30.60% | 3.240<br>312 | F830016<br>B08Rik |
| 238393                           | 2254  | 39 | 46.41% | 4.8589<br>94 | 33  | 48.18% | 4.116<br>064 | Serpina3<br>f     |

|                              |      |    |        |              |    |        |              |                   |
|------------------------------|------|----|--------|--------------|----|--------|--------------|-------------------|
| 67288                        | 1715 | 39 | 61.46% | 6.3861<br>07 | 27 | 43.27% | 4.426<br>105 | Srek1ip1          |
| 18007                        | 7388 | 39 | 19.98% | 1.4824<br>27 | 30 | 17.70% | 1.141<br>607 | Neo1              |
| 58203                        | 1988 | 39 | 49.95% | 5.5091<br>42 | 71 | 58.15% | 10.04<br>07  | Zbp1              |
| 218989                       | 5218 | 39 | 31.18% | 2.0989<br>22 | 41 | 30.80% | 2.209<br>031 | 6720456<br>H20Rik |
| 80283                        | 1896 | 39 | 53.69% | 5.7764<br>63 | 32 | 51.64% | 4.744<br>973 | Abtb1             |
| 209224                       | 3106 | 39 | 45.91% | 3.5261<br>34 | 47 | 49%    | 4.254<br>206 | Enox2             |
| 67005                        | 2925 | 39 | 40.38% | 3.7443<br>33 | 37 | 39.76% | 3.556<br>297 | Polr3k            |
| 75212                        | 1502 | 39 | 65.98% | 7.2917<br>27 | 17 | 37.95% | 3.182<br>007 | Rnf121            |
| 171170                       | 8671 | 39 | 17.63% | 1.2630<br>81 | 18 | 9.27%  | 0.583<br>614 | Mbnl3             |
| 71885                        | 3175 | 39 | 43.40% | 3.4495<br>03 | 43 | 44.82% | 3.807<br>561 | 2310003<br>H01Rik |
| 21933                        | 3197 | 39 | 17.83% | 3.4257<br>66 | 32 | 8.88%  | 2.814<br>035 | Tnfrsf10<br>b     |
| 64453                        | 4874 | 39 | 30.94% | 2.2470<br>61 | 20 | 17.56% | 1.153<br>63  | Zfp280b           |
| gi 195963388 ref NR_024067.1 | 408  | 39 | 81.13% | 26.843<br>56 | 60 | 79.17% | 41.34<br>407 | -                 |
| 68799                        | 2633 | 39 | 46.52% | 4.1595<br>8  | 27 | 37.14% | 2.882<br>936 | Rgmb              |
| 11958                        | 356  | 39 | 66.01% | 30.764<br>53 | 54 | 89.89% | 42.64<br>478 | Atp5k             |
| 66592                        | 1565 | 39 | 51.50% | 6.9981<br>94 | 31 | 53.67% | 5.568<br>901 | Stoml2            |
| 74577                        | 3451 | 39 | 32.02% | 3.1736<br>23 | 38 | 42.02% | 3.095<br>713 | Gib11             |
| 240614                       | 4867 | 39 | 33.06% | 2.2502<br>92 | 25 | 22.25% | 1.444<br>112 | Ranbp6            |
| 208117                       | 4558 | 39 | 28.92% | 2.4028<br>46 | 82 | 46.51% | 5.057<br>8   | Aph1b             |
| 69051                        | 1615 | 39 | 68.67% | 6.7815<br>32 | 22 | 44.83% | 3.829<br>766 | Pycr2             |
| 67695                        | 590  | 39 | 51.69% | 18.563<br>01 | 68 | 60.34% | 32.40<br>254 | Ost4              |
| 64655                        | 1230 | 39 | 67.72% | 8.9042<br>06 | 40 | 69.51% | 9.142<br>753 | Mrps22            |

|                                  |      |    |        |              |    |        |              |                   |
|----------------------------------|------|----|--------|--------------|----|--------|--------------|-------------------|
| 106264                           | 1471 | 39 | 55.95% | 7.4453<br>93 | 28 | 54.59% | 5.351<br>401 | 0610012<br>G03Rik |
| 330959                           | 781  | 39 | 77.34% | 14.023<br>27 | 49 | 76.95% | 17.63<br>872 | Snapc5            |
| 73419                            | 2318 | 39 | 52.63% | 4.7248<br>38 | 39 | 50.86% | 4.730<br>132 | 1700052<br>N19Rik |
| 67980                            | 1867 | 39 | 57.26% | 5.8661<br>88 | 34 | 57.74% | 5.119<br>844 | Gnpda2            |
| 69568                            | 1113 | 39 | 66.13% | 9.8402<br>28 | 40 | 71.07% | 10.10<br>385 | Vkorc111          |
| 380732                           | 1320 | 39 | 68.79% | 8.2971<br>01 | 73 | 84.70% | 15.54<br>788 | Gm885             |
| 57312                            | 1536 | 39 | 59.51% | 7.1303<br>21 | 23 | 52.86% | 4.209<br>774 | Mrps31            |
| 69895                            | 785  | 39 | 65.10% | 13.951<br>81 | 42 | 73.76% | 15.04<br>187 | Snhg8             |
| gi 141802995 ref N<br>M_026553.3 | 1455 | 39 | 54.43% | 7.5272<br>67 | 56 | 68.87% | 10.82<br>05  | -                 |
| 70791                            | 3075 | 39 | 38.08% | 3.5616<br>82 | 24 | 34.15% | 2.194<br>261 | Hars2             |
| 17829                            | 2235 | 39 | 54.23% | 4.9003<br>01 | 35 | 57.72% | 4.402<br>635 | Muc1              |
| 68925                            | 4822 | 39 | 29.97% | 2.2712<br>93 | 29 | 23.35% | 1.690<br>803 | Rpap1             |
| 230917                           | 4620 | 39 | 24.46% | 2.3706       | 34 | 23.64% | 2.068<br>993 | Tmem20<br>1       |
| 117197                           | 1306 | 38 | 64.09% | 8.1710<br>17 | 39 | 61.33% | 8.395<br>442 | Bloc1s4           |
| 107173                           | 1845 | 38 | 54.47% | 5.7839<br>29 | 35 | 50.08% | 5.333<br>273 | Gpr137            |
| 67468                            | 2780 | 38 | 14.71% | 3.8386<br>15 | 34 | 16.19% | 3.438<br>399 | Mmd               |
| 19650                            | 4909 | 38 | 24.85% | 2.1738<br>33 | 20 | 16.09% | 1.145<br>405 | Rbl1              |
| 66836                            | 748  | 38 | 73.13% | 14.266<br>51 | 21 | 62.03% | 7.892<br>958 | Tmem22<br>3       |
| 218885                           | 2062 | 38 | 51.89% | 5.1752<br>42 | 25 | 43.31% | 3.408<br>58  | Oxnad1            |
| 72170                            | 1245 | 38 | 60.56% | 8.5713<br>64 | 30 | 67.63% | 6.774<br>45  | Chchd4            |
| 67223                            | 1228 | 38 | 58.88% | 8.6900<br>23 | 34 | 65.96% | 7.783<br>997 | Rrp15             |
| 101437                           | 2962 | 38 | 45.17% | 3.6027<br>51 | 27 | 32.75% | 2.562<br>718 | Dhx32             |

|                              |      |    |        |              |    |        |              |              |
|------------------------------|------|----|--------|--------------|----|--------|--------------|--------------|
| 214572                       | 2269 | 38 | 55.97% | 4.7031<br>06 | 29 | 37.77% | 3.593<br>235 | Prmt7        |
| 12530                        | 3643 | 38 | 37.41% | 2.9292<br>75 | 27 | 32.88% | 2.083<br>659 | Cdc25a       |
| gi 194018619 ref NM_027709.1 | 1521 | 38 | 61.14% | 7.0160<br>08 | 44 | 63.31% | 8.132<br>903 | -            |
| 71474                        | 3491 | 38 | 40.99% | 3.0568<br>17 | 23 | 27.96% | 1.852<br>252 | Ppp6r2       |
| 76857                        | 2858 | 38 | 36.63% | 3.7338<br>52 | 29 | 37.44% | 2.852<br>712 | Spopl        |
| 224836                       | 5598 | 38 | 24.47% | 1.9062<br>79 | 25 | 17.56% | 1.255<br>536 | Usp49        |
| 66889                        | 2764 | 38 | 49.20% | 3.8608<br>35 | 39 | 45.04% | 3.966<br>877 | Rnf128       |
| 382985                       | 4532 | 38 | 31.53% | 2.3546<br>67 | 34 | 27.43% | 2.109<br>168 | Rrm2b        |
| 66403                        | 2192 | 38 | 36.63% | 4.8683<br>16 | 35 | 42.70% | 4.489        | Asf1a        |
| 227334                       | 5049 | 38 | 27.41% | 2.1135<br>57 | 18 | 16.10% | 1.002<br>28  | Usp40        |
| 66538                        | 830  | 38 | 87.59% | 12.857<br>05 | 44 | 91.08% | 14.90<br>379 | Rps19bp<br>1 |
| 57869                        | 3539 | 38 | 36.48% | 3.0153<br>57 | 27 | 28.54% | 2.144<br>891 | Adck2        |
| 67464                        | 3084 | 38 | 19.71% | 3.4602<br>3  | 24 | 18.32% | 2.187<br>857 | Entpd4       |
| 69804                        | 868  | 38 | 80.53% | 12.294<br>18 | 43 | 79.61% | 13.92<br>743 | Tmem14<br>7  |
| 66690                        | 2878 | 38 | 46.04% | 3.7079<br>04 | 27 | 33.08% | 2.637<br>516 | Tmem18<br>6  |
| 14077                        | 669  | 38 | 47.83% | 15.951<br>19 | 48 | 49.33% | 20.17<br>146 | Fabp3        |
| 75747                        | 2158 | 38 | 56.58% | 4.9450<br>18 | 22 | 32.90% | 2.866<br>113 | Sesn3        |
| 57258                        | 3456 | 38 | 41.41% | 3.0877<br>74 | 24 | 25.95% | 1.952<br>359 | Xpo4         |
| 52443                        | 968  | 38 | 63.74% | 11.024<br>12 | 50 | 69.63% | 14.52<br>168 | Mrpl48       |
| 69010                        | 430  | 38 | 82.09% | 24.817<br>09 | 58 | 86.74% | 37.92<br>116 | Anapc13      |
| 66861                        | 4054 | 38 | 10.09% | 2.6323<br>01 | 37 | 11.40% | 2.565<br>902 | Dnajc10      |
| 17846                        | 818  | 38 | 74.08% | 13.045<br>66 | 42 | 76.53% | 14.43<br>504 | Comm1        |



|                                    |      |    |        |              |     |        |              |         |
|------------------------------------|------|----|--------|--------------|-----|--------|--------------|---------|
| 54351                              | 1447 | 38 | 19.14% | 7.3748<br>09 | 29  | 19.70% | 5.634<br>451 | Elp5    |
| 14356                              | 1013 | 38 | 69.99% | 10.534<br>4  | 30  | 49.75% | 8.325<br>952 | Fxc1    |
| 110809                             | 5262 | 38 | 17.65% | 2.0280<br>02 | 31  | 14.33% | 1.656<br>277 | Srsf1   |
| 79464                              | 1668 | 38 | 64.81% | 6.3976<br>91 | 29  | 53.90% | 4.887<br>92  | Lias    |
| 211586                             | 7384 | 38 | 18.88% | 1.4451<br>99 | 29  | 15.32% | 1.104<br>151 | Tfdp2   |
| 71718                              | 3531 | 38 | 37.75% | 3.0221<br>89 | 27  | 28.32% | 2.149<br>751 | Telo2   |
| 16891                              | 3787 | 38 | 36.92% | 2.8178<br>9  | 74  | 57.20% | 5.493<br>619 | Lipg    |
| 71755                              | 2738 | 38 | 45.36% | 3.8974<br>98 | 46  | 48.28% | 4.723<br>311 | Dhdh    |
| gi 94400611 ref X<br>M_001003509.1 | 3991 | 38 | 21.20% | 2.6738<br>53 | 10  | 11.70% | 0.704<br>434 | -       |
| 22196                              | 3227 | 38 | 27.67% | 3.3068<br>95 | 37  | 21.60% | 3.223<br>479 | Ube2i   |
| 66358                              | 1492 | 38 | 66.29% | 7.1523<br>78 | 27  | 50%    | 5.087<br>648 | Adprm   |
| 74596                              | 3939 | 38 | 32.34% | 2.7091<br>52 | 36  | 34.30% | 2.569<br>441 | Cds1    |
| 56369                              | 924  | 38 | 79.65% | 11.549<br>08 | 44  | 82.58% | 13.38<br>76  | Apip    |
| 226695                             | 1613 | 38 | 24.92% | 6.6158<br>39 | 133 | 27.96% | 23.18<br>139 | Ifi205  |
| 67222                              | 1463 | 38 | 36.16% | 7.2941<br>55 | 33  | 33.90% | 6.341<br>496 | Srfbp1  |
| 338354                             | 5511 | 38 | 25.22% | 1.9363<br>72 | 22  | 15.33% | 1.122<br>314 | Zfp780b |
| 56349                              | 3465 | 38 | 31.83% | 3.0797<br>54 | 34  | 26.41% | 2.758<br>658 | Net1    |
| 70101                              | 2192 | 38 | 51.69% | 4.8683<br>16 | 27  | 38.41% | 3.462<br>943 | Cyp4f16 |
| 19679                              | 6643 | 38 | 21.06% | 1.6064<br>05 | 32  | 18.11% | 1.354<br>278 | Pitpnm2 |
| 18582                              | 1109 | 38 | 68.98% | 9.6224<br>96 | 36  | 77.64% | 9.126<br>265 | Pde6d   |
| 12428                              | 2827 | 38 | 38.34% | 3.7747<br>96 | 20  | 25.01% | 1.988<br>961 | Ccna2   |
| 208624                             | 1425 | 38 | 58.46% | 7.4886<br>66 | 31  | 49.96% | 6.116<br>021 | Alg3    |

|                                 |      |    |        |              |    |        |              |                   |
|---------------------------------|------|----|--------|--------------|----|--------|--------------|-------------------|
| 215387                          | 2702 | 38 | 46.89% | 3.9494<br>26 | 22 | 28.31% | 2.289<br>072 | Ncaph             |
| 114615                          | 4971 | 38 | 28.16% | 2.1467<br>21 | 29 | 25.05% | 1.640<br>123 | Elac1             |
| 57837                           | 2055 | 38 | 52.21% | 5.1928<br>7  | 36 | 52.99% | 4.925<br>074 | Eral1             |
| gi 18485509 ref N<br>M_130454.1 | 3418 | 38 | 37.95% | 3.1221<br>03 | 18 | 24.11% | 1.480<br>548 | -                 |
| 76491                           | 1490 | 38 | 53.83% | 7.1619<br>79 | 31 | 53.22% | 5.849<br>214 | Abhd14b           |
| 218793                          | 1410 | 38 | 63.40% | 7.5683<br>32 | 29 | 60.21% | 5.782<br>305 | Ube2e2            |
| 208718                          | 3171 | 38 | 45.16% | 3.3652<br>94 | 37 | 42.32% | 3.280<br>406 | Dis3l2            |
| 210789                          | 6641 | 37 | 19.79% | 1.5646<br>02 | 23 | 14.53% | 0.973<br>681 | Tbc1d4            |
| 11443                           | 2151 | 37 | 46.95% | 4.8305<br>55 | 21 | 40.35% | 2.744<br>739 | Chrb1             |
| 433791                          | 3691 | 37 | 29.21% | 2.8150<br>97 | 39 | 27.45% | 2.970<br>59  | Gm1325<br>1       |
| 99512                           | 4223 | 37 | 28.75% | 2.4604<br>6  | 23 | 21.88% | 1.531<br>189 | Wdr47             |
| 269639                          | 3317 | 37 | 41.94% | 3.1325<br>06 | 27 | 34.49% | 2.288<br>445 | Zfp512            |
| 15483                           | 1381 | 37 | 60.68% | 7.5239<br>13 | 48 | 69.66% | 9.771<br>69  | Hsd11b1           |
| 66433                           | 670  | 37 | 75.52% | 15.508<br>24 | 41 | 69.70% | 17.20<br>407 | Chchd7            |
| 66300                           | 1697 | 37 | 62.23% | 6.1228<br>78 | 32 | 44.84% | 5.301<br>396 | Prr24             |
| 70807                           | 2346 | 37 | 41.69% | 4.4290<br>38 | 18 | 29.20% | 2.157<br>082 | Arrdc2            |
| 66594                           | 436  | 37 | 81.42% | 23.831<br>48 | 44 | 80.50% | 28.37<br>189 | Uqcr11            |
| 20930                           | 1195 | 37 | 76.23% | 8.6949<br>99 | 54 | 79.83% | 12.70<br>422 | Surf1             |
| 64660                           | 1007 | 37 | 54.22% | 10.318<br>3  | 32 | 55.01% | 8.933<br>932 | Mrps24            |
| 75084                           | 2806 | 37 | 18.10% | 3.7029<br>66 | 52 | 15.11% | 5.210<br>001 | 4930511<br>M06Rik |
| 74610                           | 2962 | 37 | 40.58% | 3.5079<br>42 | 37 | 34.77% | 3.511<br>873 | Abcb8             |
| 67681                           | 959  | 37 | 65.59% | 10.834<br>75 | 39 | 73.62% | 11.43<br>321 | Mrpl18            |

|                              |      |    |        |              |    |        |              |              |
|------------------------------|------|----|--------|--------------|----|--------|--------------|--------------|
| 20480                        | 4492 | 37 | 29.43% | 2.3131<br>17 | 31 | 24.55% | 1.940<br>189 | Clpb         |
| 67463                        | 3033 | 37 | 42.24% | 3.4258<br>24 | 18 | 22.49% | 1.668<br>485 | Poc5         |
| 74318                        | 1265 | 37 | 49.49% | 8.2138<br>53 | 31 | 44.51% | 6.889<br>589 | Hopx         |
| 231571                       | 2742 | 37 | 31%    | 3.7893<br>96 | 29 | 28.30% | 2.973<br>395 | Rpap2        |
| 56017                        | 2083 | 37 | 48.97% | 4.9882<br>49 | 49 | 62.55% | 6.613<br>463 | Slc2a8       |
| 70152                        | 1883 | 37 | 50.88% | 5.5180<br>69 | 39 | 42.01% | 5.822<br>861 | Mettl7a1     |
| 50927                        | 3087 | 37 | 13.93% | 3.3658<br>97 | 41 | 14.93% | 3.733<br>957 | Nasp         |
| 666680                       | 2000 | 37 | 9%     | 5.1952<br>62 | 33 | 10.40% | 4.638<br>804 | Gm8234       |
| 68017                        | 1443 | 37 | 65.49% | 7.2006<br>4  | 91 | 86.83% | 17.72<br>953 | Ftsj2        |
| 56401                        | 3210 | 37 | 43.86% | 3.2369<br>23 | 31 | 31.62% | 2.715<br>056 | Lepre1       |
| 233189                       | 2476 | 37 | 38.21% | 4.1964<br>96 | 35 | 42.65% | 3.974<br>107 | Ctu1         |
| 12517                        | 1503 | 37 | 49.50% | 6.9131<br>89 | 15 | 32.27% | 2.805<br>785 | Cd72         |
| 226098                       | 4774 | 37 | 30.58% | 2.1764<br>82 | 21 | 15.44% | 1.236<br>685 | Hectd2       |
| 66271                        | 766  | 37 | 79.90% | 13.564<br>65 | 35 | 76.63% | 12.84<br>581 | Tmem12<br>6a |
| 233115                       | 7671 | 37 | 20.30% | 1.3545<br>2  | 26 | 13.35% | 0.952<br>892 | Dpy19l3      |
| 52840                        | 3706 | 37 | 28.09% | 2.8037<br>03 | 37 | 25.55% | 2.806<br>845 | Dbnidd2      |
| 77604                        | 3457 | 37 | 23.78% | 3.0056<br>48 | 23 | 19.12% | 1.870<br>469 | Rbm12b<br>2  |
| 67371                        | 1020 | 37 | 79.51% | 10.186<br>79 | 33 | 67.25% | 9.095<br>695 | Gtf3c6       |
| 54122                        | 4607 | 37 | 30%    | 2.2553<br>77 | 30 | 24.22% | 1.830<br>734 | Uevld        |
| 20135                        | 2199 | 37 | 50.75% | 4.7251<br>13 | 26 | 39.25% | 3.324<br>071 | Rrm2         |
| gi 114158673 ref NM_025881.2 | 1690 | 37 | 26.15% | 6.1482<br>39 | 26 | 24.32% | 4.325<br>226 | -            |
| 56322                        | 2813 | 37 | 43.58% | 3.6937<br>52 | 29 | 31.64% | 2.898<br>347 | Timm22       |

|                             |      |    |        |              |     |        |              |                   |
|-----------------------------|------|----|--------|--------------|-----|--------|--------------|-------------------|
| 68024                       | 728  | 37 | 41.76% | 14.272<br>7  | 28  | 44.09% | 10.81<br>306 | Hist1h2b<br>c     |
| 110784                      | 4087 | 37 | 31.88% | 2.5423<br>35 | 25  | 25.45% | 1.719<br>719 | Nr3c2             |
| 170787                      | 2713 | 37 | 46.30% | 3.8299<br>02 | 27  | 29.52% | 2.797<br>925 | Hdac10            |
| 211612                      | 6489 | 37 | 2.31%  | 1.6012<br>52 | 101 | 0.82%  | 4.375<br>883 | Ptchd1            |
| 22232                       | 2426 | 37 | 44.39% | 4.2829<br>86 | 46  | 51.40% | 5.330<br>76  | Slc35a2           |
| gi 31982734 ref NM_013781.2 | 3080 | 37 | 40.94% | 3.3735<br>47 | 10  | 15.23% | 0.912<br>791 | -                 |
| 69305                       | 1194 | 37 | 75.38% | 8.7022<br>81 | 41  | 70.94% | 9.653<br>874 | Dcps              |
| 634731                      | 3295 | 37 | 36.57% | 3.1534<br>21 | 40  | 34.72% | 3.412<br>925 | Susd1             |
| 235472                      | 8764 | 37 | 18.90% | 1.1855<br>91 | 28  | 14.97% | 0.898<br>21  | Prtg              |
| 60315                       | 1480 | 37 | 70%    | 7.0206<br>24 | 28  | 57.97% | 5.318<br>858 | Myg1              |
| 17904                       | 656  | 37 | 16.31% | 15.839<br>21 | 49  | 16.92% | 20.99<br>976 | Myl6              |
| 109075                      | 1789 | 37 | 58.86% | 5.8080<br>06 | 16  | 38.74% | 2.514<br>385 | Exosc4            |
| 51875                       | 1070 | 37 | 62.34% | 9.7107<br>7  | 51  | 70.37% | 13.40<br>011 | Tmem14<br>1       |
| 1E+08                       | 3827 | 37 | 8.20%  | 2.7150<br>57 | 36  | 7.92%  | 2.644<br>638 | Gm4671            |
| 215351                      | 4938 | 37 | 9.68%  | 2.1041<br>97 | 22  | 5.53%  | 1.252<br>546 | Senp6             |
| 12449                       | 3099 | 37 | 40.76% | 3.3528<br>63 | 48  | 47.98% | 4.354<br>535 | Ccnf              |
| 12234                       | 6358 | 37 | 18.26% | 1.6342<br>44 | 23  | 14.30% | 1.017<br>02  | Btrc              |
| 68277                       | 2214 | 37 | 45.48% | 4.6931       | 37  | 49.23% | 4.698<br>359 | 2310057<br>M21Rik |
| 24069                       | 2359 | 37 | 53.37% | 4.4046<br>31 | 20  | 33.40% | 2.383<br>549 | Sufu              |
| 21349                       | 4161 | 37 | 37.08% | 2.4971<br>22 | 30  | 27.20% | 2.026<br>962 | Tal1              |
| 19819                       | 1457 | 37 | 59.16% | 7.1314<br>51 | 24  | 55.18% | 4.630<br>99  | Rnaseh1           |
| 71901                       | 2109 | 37 | 27.88% | 4.9267<br>54 | 25  | 17.73% | 3.332<br>618 | 2310028<br>H24Rik |

|        |       |    |        |              |     |        |              |              |
|--------|-------|----|--------|--------------|-----|--------|--------------|--------------|
| 68975  | 1232  | 36 | 71.27% | 8.2059<br>24 | 36  | 63.56% | 8.215<br>12  | Med27        |
| 67292  | 3301  | 36 | 30.32% | 3.0626<br>17 | 15  | 16.69% | 1.277<br>52  | Pigc         |
| 72400  | 1351  | 36 | 69.28% | 7.4831<br>23 | 32  | 62.03% | 6.659<br>119 | Pinx1        |
| 109270 | 1835  | 36 | 55.64% | 5.5093<br>73 | 16  | 35.59% | 2.451<br>354 | Prr5         |
| 50492  | 2585  | 36 | 38.61% | 3.9109<br>09 | 19  | 30.83% | 2.066<br>404 | Thop1        |
| 81003  | 4258  | 36 | 23.53% | 2.3742<br>83 | 6   | 6.20%  | 0.396<br>157 | Trim23       |
| 67308  | 1173  | 36 | 53.96% | 8.6186<br>69 | 30  | 60.70% | 7.190<br>273 | Mrpl46       |
| 80284  | 1037  | 36 | 65.09% | 9.7489<br>86 | 35  | 61.04% | 9.488<br>802 | BC0032<br>66 |
| 239570 | 3766  | 36 | 35.87% | 2.6844<br>66 | 38  | 37.47% | 2.836<br>778 | Ttc38        |
| 66973  | 1073  | 36 | 43.43% | 9.4219       | 24  | 35.14% | 6.288<br>306 | Mrps18b      |
| 14923  | 1098  | 36 | 74.32% | 9.2073<br>76 | 21  | 46.63% | 5.376<br>988 | Guk1         |
| 18100  | 1055  | 36 | 56.59% | 9.5826<br>53 | 24  | 51.75% | 6.395<br>594 | Mrpl40       |
| 69581  | 3367  | 36 | 39.20% | 3.0025<br>84 | 19  | 21.77% | 1.586<br>473 | Rhou         |
| 230379 | 4204  | 36 | 25.55% | 2.4047<br>81 | 37  | 34.82% | 2.474<br>35  | Acer2        |
| 13874  | 4136  | 36 | 32.37% | 2.4443<br>18 | 130 | 60.15% | 8.836<br>595 | Ereg         |
| 11782  | 1113  | 36 | 67.39% | 9.0832<br>87 | 29  | 64.42% | 7.325<br>292 | Ap4s1        |
| 68521  | 3077  | 36 | 36.76% | 3.2855<br>7  | 16  | 20.73% | 1.461<br>89  | Fam189b      |
| 75731  | 1511  | 36 | 59.76% | 6.6907<br>34 | 21  | 39.97% | 3.907<br>302 | Idnk         |
| 207785 | 4126  | 36 | 32.33% | 2.4502<br>42 | 33  | 31.82% | 2.248<br>572 | Csrnp2       |
| 226525 | 10046 | 36 | 13.53% | 1.0063<br>41 | 28  | 12.45% | 0.783<br>587 | Rasal2       |
| 105988 | 6630  | 36 | 20.30% | 1.5248<br>41 | 37  | 19.92% | 1.568<br>954 | Espl1        |
| 1E+08  | 9807  | 36 | 14.37% | 1.0308<br>66 | 11  | 5.50%  | 0.315<br>34  | Zfp831       |

|                                     |      |    |        |              |    |        |              |                   |
|-------------------------------------|------|----|--------|--------------|----|--------|--------------|-------------------|
| 1E+08                               | 3389 | 36 | 14.61% | 2.9830<br>92 | 21 | 10.48% | 1.742<br>087 | Gm1084<br>5       |
| 110959                              | 1927 | 36 | 49.30% | 5.2463<br>41 | 24 | 42.40% | 3.501<br>48  | Nudt19            |
| 94065                               | 663  | 36 | 82.20% | 15.248<br>41 | 34 | 81.90% | 14.41<br>742 | Mrpl34            |
| 216363                              | 2690 | 36 | 33.31% | 3.7582<br>52 | 34 | 37.66% | 3.553<br>438 | Rab3ip            |
| 22717                               | 3815 | 36 | 35.18% | 2.6499<br>87 | 8  | 9.65%  | 0.589<br>546 | Zfp59             |
| 54137                               | 1913 | 36 | 41.04% | 5.2847<br>35 | 39 | 36.49% | 5.731<br>546 | Acrbp             |
| 225651                              | 2007 | 36 | 43.85% | 5.0372<br>19 | 12 | 22.57% | 1.680<br>955 | Mppe1             |
| 170767                              | 2185 | 36 | 48.74% | 4.6268<br>64 | 25 | 33.59% | 3.216<br>701 | Rfxap             |
| 17299                               | 887  | 36 | 70.24% | 11.397<br>63 | 25 | 68.55% | 7.923<br>891 | Mettl1            |
| gi 149241029 ref X<br>M_001479454.1 | 685  | 36 | 26.13% | 14.758<br>68 | 44 | 23.21% | 18.05<br>861 | -                 |
| 69662                               | 1252 | 36 | 62.46% | 8.0748<br>39 | 27 | 54.07% | 6.062<br>916 | 2310061<br>I04Rik |
| 20503                               | 2422 | 36 | 42.07% | 4.1741<br>12 | 42 | 54.91% | 4.875<br>254 | Slc16a7           |
| 20170                               | 2696 | 36 | 38.32% | 3.7498<br>88 | 35 | 45.36% | 3.649<br>81  | Hps6              |
| 20021                               | 1580 | 36 | 24.81% | 6.3985<br>43 | 25 | 21.77% | 4.448<br>412 | Polr2c            |
| 218311                              | 2712 | 36 | 41.45% | 3.7277<br>65 | 26 | 37.17% | 2.695<br>292 | Zfp455            |
| 212862                              | 3239 | 36 | 29.18% | 3.1212<br>41 | 47 | 45.08% | 4.079<br>52  | Chpt1             |
| 66071                               | 1497 | 36 | 42.42% | 6.7533<br>06 | 38 | 50.57% | 7.136<br>478 | Ethe1             |
| 21941                               | 1575 | 36 | 67.75% | 6.4188<br>56 | 6  | 15.56% | 1.071<br>008 | Tnfrsf8           |
| 214489                              | 3046 | 36 | 36.38% | 3.3190<br>08 | 29 | 33.81% | 2.676<br>642 | BC0039<br>65      |
| 65967                               | 2679 | 36 | 39.75% | 3.7736<br>84 | 44 | 49.76% | 4.617<br>449 | Eefsec            |
| 66167                               | 637  | 36 | 43.96% | 15.870<br>8  | 46 | 52.28% | 20.30<br>208 | Tma7              |
| 234378                              | 3069 | 36 | 33.30% | 3.2941<br>34 | 21 | 22.94% | 1.923<br>732 | Klhl26            |

|                                     |      |    |        |              |    |        |              |             |
|-------------------------------------|------|----|--------|--------------|----|--------|--------------|-------------|
| 107733                              | 2423 | 36 | 26.62% | 4.1723<br>89 | 29 | 26.25% | 3.364<br>858 | Mrpl41      |
| 18045                               | 2552 | 36 | 44.40% | 3.9614<br>81 | 49 | 50.43% | 5.398<br>058 | Nfyb        |
| 101100                              | 3125 | 36 | 35.14% | 3.2351<br>04 | 24 | 26.88% | 2.159<br>153 | Ttl3        |
| 12068                               | 1492 | 36 | 61.73% | 6.7759<br>37 | 32 | 58.24% | 6.029<br>805 | Bet1        |
| 14872                               | 1370 | 36 | 52.77% | 7.3793<br>42 | 23 | 35.55% | 4.719<br>863 | Gstt2       |
| 71684                               | 2072 | 36 | 59.07% | 4.8791<br>98 | 21 | 40.93% | 2.849<br>388 | Rbm43       |
| 59038                               | 1468 | 36 | 62.81% | 6.8867<br>16 | 26 | 51.02% | 4.979<br>313 | Pxmp4       |
| 56357                               | 2067 | 36 | 53.41% | 4.8910<br>01 | 25 | 44.22% | 3.400<br>335 | Ivd         |
| gi 149253671 ref X<br>M_001474515.1 | 2462 | 36 | 12.59% | 4.1062<br>95 | 25 | 11.54% | 2.854<br>789 | -           |
| 217708                              | 2144 | 36 | 51.49% | 4.7153<br>45 | 15 | 23.93% | 1.966<br>929 | Lin52       |
| 16593                               | 2504 | 36 | 19.41% | 4.0374<br>2  | 24 | 18.57% | 2.694<br>629 | Klc1        |
| 233802                              | 2668 | 36 | 17.92% | 3.7892<br>42 | 28 | 16.42% | 2.950<br>491 | Thumpd<br>1 |
| gi 149260537 ref X<br>M_001472222.1 | 945  | 36 | 61.48% | 10.698<br>09 | 58 | 89.31% | 17.25<br>513 | -           |
| 626848                              | 3345 | 36 | 32.62% | 3.0223<br>31 | 15 | 10.58% | 1.260<br>716 | Etohi1      |
| 231002                              | 2210 | 36 | 47.10% | 4.5745<br>24 | 40 | 51.31% | 5.088<br>501 | Plekhn1     |
| 66369                               | 1860 | 36 | 58.55% | 5.4353<br>22 | 21 | 34.09% | 3.174<br>157 | Dus2l       |
| 433586                              | 6514 | 36 | 23.35% | 1.5519<br>95 | 56 | 31.19% | 2.416<br>921 | Maml3       |
| 66148                               | 671  | 36 | 75.86% | 15.066<br>61 | 35 | 77.79% | 14.66<br>451 | Dnajc15     |
| 16551                               | 4850 | 35 | 25.98% | 2.0265<br>72 | 38 | 30.25% | 2.202<br>744 | Kif11       |
| gi 149249600 ref X<br>R_034660.1    | 1843 | 35 | 26.53% | 5.3330<br>84 | 40 | 24.85% | 6.101<br>783 | -           |
| gi 118130216 ref N<br>M_146120.3    | 2593 | 35 | 45.01% | 3.7905<br>41 | 8  | 13.46% | 0.867<br>38  | -           |
| 56436                               | 1429 | 35 | 24.14% | 6.8781<br>48 | 32 | 23.65% | 6.295<br>64  | Adrm1       |

|                                  |       |    |        |              |    |        |              |                   |
|----------------------------------|-------|----|--------|--------------|----|--------|--------------|-------------------|
| 19173                            | 871   | 35 | 45.81% | 11.284<br>59 | 24 | 37.89% | 7.746<br>673 | Psmb5             |
| gi 118130166 ref N<br>M_031196.2 | 2295  | 35 | 54.68% | 4.2827<br>34 | 22 | 36.99% | 2.695<br>021 | -                 |
| 103737                           | 2726  | 35 | 43.58% | 3.6056<br>03 | 19 | 27.22% | 1.959<br>521 | Pex12             |
| gi 118130718 ref N<br>M_183167.3 | 1822  | 35 | 60.92% | 5.3945<br>52 | 15 | 34.63% | 2.314<br>542 | -                 |
| 230126                           | 2762  | 35 | 37.26% | 3.5586<br>07 | 34 | 30.63% | 3.460<br>807 | Shb               |
| 68190                            | 1815  | 35 | 64.24% | 5.4153<br>57 | 12 | 27.05% | 1.858<br>775 | 5330426<br>P16Rik |
| 67966                            | 1257  | 35 | 65.16% | 7.8193<br>11 | 30 | 65.31% | 6.709<br>777 | Zcchc10           |
| 67604                            | 2106  | 35 | 33.19% | 4.6670<br>82 | 30 | 37.84% | 4.004<br>838 | Get4              |
| 239556                           | 9833  | 35 | 13.51% | 0.9995<br>8  | 12 | 5.50%  | 0.343<br>097 | Cacna1i           |
| 69076                            | 1049  | 35 | 61.01% | 9.3697<br>56 | 35 | 67.87% | 9.380<br>256 | Triap1            |
| 211550                           | 2164  | 35 | 30.78% | 4.5419<br>93 | 34 | 28.93% | 4.417<br>167 | Tifa              |
| 66684                            | 2358  | 35 | 10.86% | 4.1683<br>09 | 27 | 17.01% | 3.219<br>156 | Tceal8            |
| 239849                           | 1700  | 35 | 52.53% | 5.7816<br>9  | 18 | 40.24% | 2.976<br>773 | Cd200r4           |
| 223773                           | 5403  | 35 | 17.51% | 1.8191<br>51 | 25 | 15.27% | 1.300<br>85  | Zbed4             |
| 54364                            | 1172  | 35 | 70.14% | 8.3864<br>11 | 26 | 58.62% | 6.236<br>887 | Rpp30             |
| 107934                           | 11558 | 35 | 11%    | 0.8503<br>96 | 13 | 5.09%  | 0.316<br>215 | Celsr3            |
| 71567                            | 3873  | 35 | 31.99% | 2.5377<br>93 | 27 | 25.87% | 1.959<br>92  | Mcm9              |
| 66653                            | 1383  | 35 | 69.92% | 7.1069<br>22 | 25 | 56.25% | 5.082<br>062 | Brf2              |
| 68634                            | 1003  | 35 | 69.09% | 9.7994<br>75 | 34 | 77.07% | 9.530<br>158 | Tm2d3             |
| 228602                           | 4975  | 35 | 26.83% | 1.9756<br>53 | 21 | 18.77% | 1.186<br>72  | 4930402<br>H24Rik |
| 71711                            | 2004  | 35 | 55.94% | 4.9046<br>28 | 14 | 27.15% | 1.964<br>05  | Mus81             |
| 66294                            | 1765  | 35 | 56.43% | 5.5687<br>67 | 48 | 68.44% | 7.645<br>725 | Fam3a             |



|                                     |      |    |        |              |    |        |              |                   |
|-------------------------------------|------|----|--------|--------------|----|--------|--------------|-------------------|
| 101612                              | 1905 | 35 | 55.75% | 5.1595<br>14 | 50 | 60.26% | 7.378<br>994 | Grwd1             |
| 67678                               | 631  | 35 | 85.74% | 15.576<br>66 | 26 | 79.71% | 11.58<br>42  | Lsm3              |
| 68493                               | 3632 | 35 | 29.82% | 2.7061<br>88 | 33 | 29.38% | 2.554<br>408 | Ndufaf4           |
| 67911                               | 4202 | 35 | 31.01% | 2.3390<br>94 | 10 | 11.14% | 0.669<br>062 | Zfp169            |
| 11431                               | 3107 | 35 | 17.44% | 3.1634<br>61 | 40 | 18.73% | 3.619<br>436 | Acp1              |
| 16434                               | 1264 | 35 | 63.05% | 7.7760<br>08 | 59 | 89.32% | 13.12<br>282 | Itpa              |
| 66689                               | 2854 | 35 | 43.10% | 3.4438<br>94 | 20 | 31.29% | 1.970<br>145 | Klh128            |
| 212514                              | 4342 | 35 | 29.94% | 2.2636<br>74 | 19 | 16.65% | 1.230<br>229 | Spice1            |
| 73754                               | 2267 | 35 | 44.20% | 4.3356<br>3  | 22 | 29.51% | 2.728<br>307 | Thap1             |
| gi 149252707 ref X<br>M_001478657.1 | 3992 | 35 | 18.59% | 2.4621<br>43 | 37 | 22.04% | 2.605<br>753 | -                 |
| 232223                              | 2836 | 35 | 47.88% | 3.4657<br>52 | 34 | 45.03% | 3.370<br>504 | Txnrd3            |
| 11844                               | 933  | 35 | 21.97% | 10.534<br>7  | 25 | 25.94% | 7.533<br>217 | Arf5              |
| 15289                               | 2327 | 35 | 21.70% | 4.2238<br>39 | 48 | 23.42% | 5.799<br>185 | Hmgb1             |
| 59032                               | 2395 | 35 | 38.41% | 4.1039<br>14 | 19 | 19.21% | 2.230<br>336 | Ppp2r3c           |
| 233575                              | 1184 | 35 | 73.31% | 8.3014<br>14 | 48 | 82.69% | 11.39<br>755 | Pgap2             |
| gi 149268380 ref X<br>M_001476640.1 | 3372 | 35 | 18.89% | 2.9148<br>5  | 16 | 13.61% | 1.333<br>996 | -                 |
| 73218                               | 2887 | 35 | 40.56% | 3.4045<br>28 | 25 | 30.90% | 2.434<br>531 | 3110056<br>O03Rik |
| 55943                               | 4123 | 35 | 19.52% | 2.3839<br>13 | 50 | 16.64% | 3.409<br>407 | Stx8              |
| 243771                              | 3322 | 35 | 31.43% | 2.9587<br>22 | 37 | 38.20% | 3.131<br>297 | Parp12            |
| 209357                              | 2664 | 35 | 34.72% | 3.6895<br>17 | 25 | 29.50% | 2.638<br>323 | Gtf2h3            |
| 71983                               | 1815 | 35 | 54.05% | 5.4153<br>57 | 27 | 50.63% | 4.182<br>243 | Tmco6             |
| 107766                              | 1252 | 35 | 71.09% | 7.8505<br>38 | 15 | 40.65% | 3.368<br>287 | Haa0              |

|                                  |      |    |        |              |    |        |              |                   |
|----------------------------------|------|----|--------|--------------|----|--------|--------------|-------------------|
| 72726                            | 1843 | 35 | 52.63% | 5.3330<br>84 | 40 | 51.71% | 6.101<br>783 | Tbcc              |
| 65247                            | 5971 | 35 | 23.76% | 1.6461<br>02 | 19 | 13.68% | 0.894<br>599 | Asb1              |
| 66461                            | 1322 | 35 | 58.77% | 7.4348<br>52 | 45 | 60.89% | 9.569<br>807 | Ptpmt1            |
| 76916                            | 2080 | 35 | 52.93% | 4.7254<br>2  | 25 | 35.19% | 3.379<br>082 | Timmdc<br>1       |
| gi 141802913 ref N<br>M_030145.2 | 2107 | 35 | 51.35% | 4.6648<br>66 | 35 | 42.15% | 4.670<br>094 | -                 |
| 268390                           | 3604 | 35 | 21.78% | 2.7272<br>12 | 29 | 23.95% | 2.262<br>223 | Ahsa2             |
| 66439                            | 2176 | 35 | 47.33% | 4.5169<br>46 | 41 | 52.67% | 5.297<br>209 | 2010012<br>O05Rik |
| 30926                            | 1651 | 35 | 35.49% | 5.9532<br>85 | 29 | 33.31% | 4.938<br>25  | Glr3              |
| 100340                           | 1925 | 35 | 59.43% | 5.1059<br>08 | 68 | 73.71% | 9.931<br>167 | Smpd13b           |
| 67091                            | 782  | 35 | 81.59% | 12.568<br>89 | 40 | 83.38% | 14.38<br>055 | Trappc6a          |
| 109275                           | 2381 | 35 | 47.04% | 4.1280<br>44 | 22 | 37%    | 2.597<br>679 | Actr5             |
| 26429                            | 2059 | 35 | 56.39% | 4.7736<br>15 | 21 | 36.13% | 2.867<br>379 | Orc5              |
| 171463                           | 8220 | 35 | 17.74% | 1.1957<br>27 | 13 | 6.68%  | 0.444<br>625 | Il17rd            |
| 20603                            | 3377 | 35 | 32.43% | 2.9105<br>34 | 37 | 35.03% | 3.080<br>298 | Sms               |
| 71147                            | 3752 | 35 | 29.85% | 2.6196<br>36 | 11 | 12.47% | 0.824<br>237 | Oxsm              |
| 67773                            | 1503 | 35 | 55.49% | 6.5395<br>03 | 34 | 60.21% | 6.359<br>779 | Kat8              |
| 214895                           | 2298 | 35 | 50.83% | 4.2771<br>43 | 21 | 34.73% | 2.569<br>161 | Lman2l            |
| 244416                           | 4229 | 35 | 31.88% | 2.3241<br>6  | 23 | 21.94% | 1.529<br>017 | Ppp1r3b           |
| 269060                           | 5652 | 35 | 26.45% | 1.7390<br>08 | 15 | 11.94% | 0.746<br>124 | Dagla             |
| 56541                            | 2584 | 35 | 41.45% | 3.8037<br>44 | 34 | 41.95% | 3.699<br>206 | Habp4             |
| 269997                           | 2684 | 35 | 39.27% | 3.6620<br>24 | 35 | 43.07% | 3.666<br>128 | Zfp747            |
| 22592                            | 4010 | 35 | 31.10% | 2.4510<br>91 | 25 | 23.27% | 1.752<br>741 | Ercc5             |

|                                     |      |    |        |              |    |        |              |                   |
|-------------------------------------|------|----|--------|--------------|----|--------|--------------|-------------------|
| 140493                              | 7617 | 35 | 19.97% | 1.2903<br>86 | 43 | 25.93% | 1.587<br>108 | Kenn3             |
| 668902                              | 4504 | 35 | 11.77% | 2.1822<br>54 | 31 | 9.19%  | 1.935<br>02  | Gm9422            |
| 320162                              | 2737 | 35 | 42.46% | 3.5911<br>12 | 42 | 49.25% | 4.314<br>164 | Ccdc45            |
| 226830                              | 1619 | 35 | 61.15% | 6.0709<br>53 | 21 | 43.42% | 3.646<br>654 | Smyd2             |
| 66114                               | 1160 | 35 | 72.84% | 8.4731<br>67 | 24 | 55.69% | 5.816<br>683 | Dnajc30           |
| 58230                               | 2046 | 35 | 43.65% | 4.8039<br>46 | 28 | 39.59% | 3.847<br>464 | Rnf8              |
| 109145                              | 1364 | 35 | 62.61% | 7.2059<br>19 | 35 | 66.35% | 7.213<br>994 | Gins4             |
| 14296                               | 2614 | 35 | 42.96% | 3.7600<br>89 | 23 | 28.58% | 2.473<br>685 | Frat1             |
| 218506                              | 1849 | 34 | 47.43% | 5.1638<br>99 | 27 | 42.51% | 4.105<br>338 | Mrps27            |
| gi 149259254 ref X<br>M_001476984.1 | 7214 | 34 | 18.73% | 1.3235<br>44 | 40 | 21.67% | 1.558<br>856 | -                 |
| gi 149274530 ref X<br>M_001473825.1 | 2854 | 34 | 8.34%  | 3.3454<br>97 | 18 | 7.81%  | 1.773<br>13  | -                 |
| 66521                               | 1082 | 34 | 41.77% | 8.8244<br>44 | 21 | 32.35% | 5.456<br>5   | Rwdd1             |
| 72357                               | 1350 | 34 | 60.67% | 7.0726<br>29 | 33 | 68%    | 6.872<br>303 | 2210016<br>L21Rik |
| 14533                               | 550  | 34 | 87.82% | 17.360<br>09 | 46 | 93.27% | 23.51<br>35  | Bloc1s1           |
| 213760                              | 3830 | 34 | 31.36% | 2.4929<br>63 | 9  | 10.78% | 0.660<br>642 | Prepl             |
| 218314                              | 3909 | 34 | 29.44% | 2.4425<br>81 | 14 | 16.71% | 1.006<br>896 | Zfp595            |
| 74016                               | 3743 | 34 | 28.32% | 2.5509<br>08 | 15 | 16.48% | 1.126<br>662 | Phf19             |
| 16529                               | 3364 | 34 | 32.73% | 2.8383<br>02 | 12 | 8.83%  | 1.002<br>876 | Kcnk5             |
| 22317                               | 3170 | 34 | 42.49% | 3.0120<br>03 | 11 | 14.07% | 0.975<br>563 | Vamp1             |
| 22271                               | 1297 | 34 | 63.15% | 7.3616<br>41 | 31 | 56.75% | 6.719<br>606 | Upp1              |
| 381903                              | 2002 | 34 | 54.15% | 4.7692<br>55 | 24 | 40.21% | 3.370<br>306 | Alg8              |
| 67933                               | 2386 | 34 | 45.73% | 4.0016<br>97 | 26 | 40.74% | 3.063<br>55  | Hcfc2             |

|                                |      |    |        |              |    |        |              |              |
|--------------------------------|------|----|--------|--------------|----|--------|--------------|--------------|
| 18022                          | 1793 | 34 | 50.70% | 5.3251<br>81 | 11 | 18.80% | 1.724<br>783 | Nfe2         |
| 233406                         | 3035 | 34 | 36.90% | 3.1459<br>8  | 26 | 27.64% | 2.408<br>445 | Prc1         |
| 381510                         | 2984 | 34 | 44.91% | 3.1997<br>48 | 20 | 26.44% | 1.884<br>314 | Dpy1914      |
| 71726                          | 3611 | 34 | 33.92% | 2.6441<br>56 | 17 | 18.11% | 1.323<br>56  | Smug1        |
| 328370                         | 2384 | 34 | 46.64% | 4.0050<br>54 | 22 | 34.10% | 2.594<br>41  | Rft1         |
| gi 6753085 ref NM<br>_009687.1 | 1185 | 34 | 32.91% | 8.0574<br>25 | 32 | 30.80% | 7.591<br>957 | -            |
| 244141                         | 3770 | 34 | 28.09% | 2.5326<br>39 | 17 | 16.98% | 1.267<br>739 | Nars2        |
| 12070                          | 939  | 34 | 66.99% | 10.168<br>32 | 33 | 66.88% | 9.880<br>308 | Ngfrap1      |
| 17420                          | 2505 | 34 | 34.61% | 3.8115<br>96 | 28 | 32.34% | 3.142<br>479 | Mnat1        |
| 67285                          | 1884 | 34 | 50.21% | 5.0679<br>66 | 34 | 57.22% | 5.073<br>646 | Cwc27        |
| 17083                          | 1487 | 34 | 56.89% | 6.4210<br>15 | 51 | 63.42% | 9.642<br>315 | Tmed1        |
| 105445                         | 8221 | 34 | 16.25% | 1.1614<br>22 | 17 | 8.92%  | 0.581<br>362 | Dock9        |
| 114644                         | 3224 | 34 | 38.86% | 2.9615<br>54 | 34 | 36.91% | 2.964<br>872 | Slc13a3      |
| 110119                         | 1757 | 34 | 53.78% | 5.4342<br>91 | 19 | 49.69% | 3.040<br>213 | Mpi          |
| 67153                          | 1457 | 34 | 53.12% | 6.5532<br>25 | 40 | 61.91% | 7.718<br>316 | Rnaseh2<br>b |
| 215708                         | 5355 | 34 | 28.50% | 1.7830<br>16 | 27 | 23.25% | 1.417<br>511 | Fam73a       |
| 11409                          | 1880 | 34 | 63.88% | 5.0787<br>49 | 42 | 66.01% | 6.280<br>78  | Acads        |
| 20239                          | 4505 | 34 | 9.08%  | 2.1194<br>34 | 21 | 8.04%  | 1.310<br>529 | Atxn2        |
| 654470                         | 2068 | 34 | 49.13% | 4.6170<br>45 | 23 | 46.95% | 3.126<br>795 | Tctn1        |
| 64424                          | 2944 | 34 | 31.56% | 3.2432<br>23 | 16 | 20.14% | 1.527<br>933 | Polr1e       |
| 72544                          | 1261 | 34 | 41.95% | 7.5718<br>07 | 35 | 40.13% | 7.803<br>242 | Exosc6       |
| 56350                          | 838  | 34 | 81.38% | 11.393<br>85 | 24 | 74.82% | 8.051<br>733 | Arl3         |

|        |      |    |        |              |    |        |              |                   |
|--------|------|----|--------|--------------|----|--------|--------------|-------------------|
| 331026 | 1789 | 34 | 55.67% | 5.3370<br>87 | 37 | 49.25% | 5.814<br>515 | Gmppb             |
| 66056  | 1105 | 34 | 69.23% | 8.6407<br>68 | 22 | 55.20% | 5.597<br>351 | Zfp524            |
| 94061  | 3431 | 34 | 32.47% | 2.7828<br>76 | 49 | 34.71% | 4.015<br>11  | Mrpl1             |
| 70088  | 876  | 34 | 72.60% | 10.899<br>6  | 34 | 85.62% | 10.91<br>181 | Meaf6             |
| 28200  | 1408 | 34 | 56.25% | 6.7812<br>85 | 42 | 71.80% | 8.386<br>268 | Dhrs4             |
| 382793 | 6275 | 34 | 21.71% | 1.5216<br>01 | 12 | 9.37%  | 0.537<br>638 | Mtx3              |
| 1E+08  | 2186 | 34 | 46.57% | 4.3678<br>17 | 33 | 49.73% | 4.244<br>103 | Gm1603<br>9       |
| 219150 | 2931 | 34 | 42.85% | 3.2576<br>08 | 23 | 29.24% | 2.206<br>145 | Hmbox1            |
| 140483 | 1653 | 34 | 57.05% | 5.7761<br>94 | 31 | 54.20% | 5.272<br>432 | Hnmt              |
| 69179  | 3754 | 34 | 33.32% | 2.5434<br>33 | 34 | 28.53% | 2.546<br>284 | Tmem11<br>0       |
| 19143  | 4017 | 34 | 31.19% | 2.3769<br>1  | 45 | 35.08% | 3.149<br>436 | St14              |
| 69740  | 1610 | 34 | 60.19% | 5.9304<br>65 | 35 | 59.07% | 6.111<br>732 | Dph5              |
| 96957  | 2886 | 34 | 42.13% | 3.3084<br>02 | 28 | 32.12% | 2.727<br>62  | Tmem62            |
| 243510 | 3129 | 34 | 38.19% | 3.0514<br>7  | 10 | 13.39% | 0.898<br>497 | Ccdc142           |
| 73247  | 1192 | 34 | 62.50% | 8.0101<br>08 | 20 | 46.90% | 4.717<br>108 | 1600027<br>N09Rik |
| 237711 | 8080 | 34 | 16.81% | 1.1816<br>89 | 20 | 11.30% | 0.695<br>89  | Eml6              |
| 50799  | 3133 | 34 | 38.94% | 3.0475<br>74 | 41 | 46.12% | 3.679<br>134 | Slc25a13          |
| 246727 | 4718 | 34 | 19.86% | 2.0237<br>49 | 65 | 33.51% | 3.873<br>268 | Oas3              |
| 218100 | 4912 | 34 | 29.05% | 1.9438<br>21 | 23 | 18.61% | 1.316<br>411 | Zfp322a           |
| 107239 | 3968 | 34 | 33.42% | 2.4062<br>62 | 21 | 21.47% | 1.487<br>886 | Carns1            |
| 67224  | 2162 | 34 | 47.59% | 4.4163<br>04 | 42 | 37.97% | 5.461<br>548 | Med29             |
| 67512  | 837  | 34 | 73.36% | 11.407<br>47 | 28 | 68.94% | 9.404<br>911 | Agpat2            |

|                                     |      |    |        |              |    |        |              |                   |
|-------------------------------------|------|----|--------|--------------|----|--------|--------------|-------------------|
| gi 149255599 ref X<br>M_001476823.1 | 405  | 34 | 60.99% | 23.575<br>43 | 15 | 62.22% | 10.41<br>258 | -                 |
| 22275                               | 1199 | 34 | 77.90% | 7.9633<br>43 | 52 | 84.90% | 12.19<br>288 | Urod              |
| 106672                              | 653  | 33 | 92.50% | 14.191<br>77 | 46 | 75.34% | 19.80<br>463 | AI41358<br>2      |
| 238123                              | 2997 | 33 | 40.24% | 3.0921<br>67 | 22 | 30.36% | 2.063<br>755 | Cog5              |
| 66966                               | 2059 | 33 | 51.19% | 4.5008<br>37 | 10 | 19.04% | 1.365<br>418 | Trit1             |
| 20648                               | 2115 | 33 | 49.08% | 4.3816<br>66 | 25 | 41.18% | 3.323<br>164 | Snta1             |
| 71041                               | 2126 | 33 | 48.97% | 4.3589<br>95 | 17 | 29.87% | 2.248<br>059 | Pcgf6             |
| 27398                               | 1012 | 33 | 74.11% | 9.1573<br>36 | 23 | 64.13% | 6.389<br>538 | Mrpl2             |
| 223664                              | 2277 | 33 | 46.55% | 4.0699<br>27 | 19 | 31.62% | 2.345<br>917 | Lrnc14            |
| 224023                              | 2633 | 33 | 50.63% | 3.5196<br>44 | 19 | 27.95% | 2.028<br>733 | Klhl22            |
| 245622                              | 8308 | 33 | 16.36% | 1.1154<br>58 | 21 | 11.58% | 0.710<br>632 | Fam199x           |
| 67883                               | 1263 | 33 | 50.04% | 7.3374<br>69 | 42 | 49.80% | 9.349<br>062 | Uxs1              |
| 71891                               | 3209 | 33 | 27.89% | 2.8878<br>85 | 27 | 23%    | 2.365<br>463 | Cdadc1            |
| 72612                               | 1210 | 33 | 58.51% | 7.6588<br>63 | 39 | 64.05% | 9.061<br>526 | 2700029<br>M09Rik |
| 12579                               | 1393 | 33 | 30.87% | 6.6527<br>09 | 41 | 33.02% | 8.274<br>75  | Cdkn2b            |
| 102632                              | 3348 | 33 | 36.23% | 2.7679<br>88 | 29 | 32.56% | 2.435<br>2   | Acad11            |
| gi 256355172 ref N<br>R_015523.1    | 2376 | 33 | 24.75% | 3.9003<br>47 | 44 | 27.74% | 5.206<br>29  | -                 |
| 80861                               | 2427 | 33 | 43.26% | 3.8183<br>86 | 33 | 48.29% | 3.822<br>665 | Dhx58             |
| 77976                               | 5032 | 33 | 24.36% | 1.8416<br>58 | 34 | 28.86% | 1.899<br>592 | Nuak1             |
| 1E+08                               | 2797 | 33 | 14.44% | 3.3132<br>73 | 53 | 25.81% | 5.327<br>28  | Gm1400<br>5       |
| gi 51591904 ref N<br>M_033477.1     | 882  | 33 | 80.50% | 10.507<br>06 | 27 | 69.16% | 8.606<br>316 | -                 |
| 66282                               | 1088 | 33 | 42.10% | 8.5176<br>69 | 39 | 46.05% | 10.07<br>762 | Tma16             |

|                             |      |    |        |              |    |        |              |                   |
|-----------------------------|------|----|--------|--------------|----|--------|--------------|-------------------|
| 66242                       | 566  | 33 | 93.46% | 16.373<br>19 | 23 | 89.05% | 11.42<br>44  | Mrps16            |
| 99045                       | 991  | 33 | 70.94% | 9.3513<br>86 | 25 | 56.61% | 7.092<br>322 | Mrps26            |
| gi 21312773 ref NM_024205.1 | 1026 | 33 | 79.04% | 9.0323<br>82 | 39 | 72.90% | 10.68<br>66  | -                 |
| 18559                       | 1971 | 33 | 54.13% | 4.7017<br>88 | 28 | 44.60% | 3.993<br>866 | Pctp              |
| 18038                       | 1470 | 33 | 63.95% | 6.3042<br>34 | 32 | 51.84% | 6.120<br>047 | Nfkbi1            |
| 380752                      | 1692 | 33 | 54.73% | 5.4770<br>83 | 31 | 57.74% | 5.150<br>904 | Tssc1             |
| 74753                       | 1558 | 33 | 53.85% | 5.9481<br>54 | 17 | 36.71% | 3.067<br>634 | 5830415<br>F09Rik |
| 18632                       | 2439 | 33 | 37.93% | 3.7996       | 14 | 21.44% | 1.613<br>758 | Pex11b            |
| 1E+08                       | 3607 | 33 | 17.13% | 2.5692<br>33 | 34 | 17.02% | 2.650<br>055 | Gm3735            |
| 67168                       | 2468 | 33 | 42.99% | 3.7549<br>53 | 28 | 31.77% | 3.189<br>591 | Lpar6             |
| 226527                      | 1289 | 33 | 67.57% | 7.1894<br>68 | 30 | 61.99% | 6.543<br>204 | BC0265<br>85      |
| 1E+08                       | 2516 | 33 | 12.36% | 3.6833<br>16 | 30 | 12.36% | 3.352<br>222 | Srp54c            |
| 68910                       | 3629 | 33 | 35.41% | 2.5536<br>58 | 26 | 19.48% | 2.014<br>227 | Zfp467            |
| 21339                       | 2536 | 33 | 41.88% | 3.6542<br>68 | 33 | 37.85% | 3.658<br>363 | Taf1a             |
| 319901                      | 5763 | 33 | 21.62% | 1.6080<br>55 | 64 | 32.12% | 3.122<br>148 | Dsel              |
| 71904                       | 2067 | 33 | 49.54% | 4.4834<br>17 | 42 | 55.25% | 5.712<br>562 | Paqr7             |
| 67674                       | 1047 | 33 | 41.26% | 8.8512<br>17 | 37 | 43.74% | 9.935<br>212 | Trmt112           |
| 11898                       | 1631 | 33 | 35.07% | 5.6819<br>28 | 31 | 31.76% | 5.343<br>55  | Ass1              |
| 66513                       | 3013 | 33 | 39.13% | 3.0757<br>46 | 12 | 16.66% | 1.119<br>707 | Tab1              |
| 223690                      | 1894 | 33 | 49.79% | 4.8929<br>38 | 24 | 42.34% | 3.562<br>488 | Ankrd54           |
| 58186                       | 2701 | 33 | 42.06% | 3.4310<br>34 | 19 | 28.88% | 1.977<br>658 | Rad18             |
| 665113                      | 7146 | 33 | 18.21% | 1.2968<br>41 | 29 | 17.27% | 1.140<br>925 | Tnik              |

|                              |      |    |        |              |    |        |              |         |
|------------------------------|------|----|--------|--------------|----|--------|--------------|---------|
| 72772                        | 3311 | 33 | 33.37% | 2.7989<br>2  | 25 | 29.81% | 2.122<br>77  | Rint1   |
| 14870                        | 744  | 33 | 39.52% | 12.455<br>95 | 29 | 35.48% | 10.95<br>84  | Gstp1   |
| 218820                       | 4251 | 33 | 26.44% | 2.1800<br>1  | 30 | 22.32% | 1.984<br>048 | Zfp503  |
| 233065                       | 963  | 33 | 78.09% | 9.6232<br>85 | 40 | 81.20% | 11.67<br>766 | Alkbh6  |
| 68839                        | 2480 | 33 | 43.99% | 3.7367<br>84 | 35 | 48.31% | 3.967<br>697 | Ankrd46 |
| gi 148747457 ref NM_172570.4 | 1897 | 33 | 51.71% | 4.8852       | 19 | 33.21% | 2.815<br>843 | -       |
| 66233                        | 1543 | 33 | 67.60% | 6.0059<br>78 | 29 | 60.01% | 5.283<br>895 | Dmap1   |
| 19744                        | 1521 | 33 | 18.08% | 6.0928<br>49 | 33 | 17.23% | 6.099<br>677 | Rheb    |
| 66225                        | 1162 | 33 | 35.11% | 7.9752<br>36 | 33 | 33.65% | 7.984<br>173 | Llph    |
| 71819                        | 3439 | 33 | 34.78% | 2.6947<br>44 | 27 | 30.97% | 2.207<br>261 | Kif23   |
| 100900                       | 825  | 32 | 77.58% | 10.892<br>6  | 33 | 65.33% | 11.24<br>559 | Hscb    |
| gi 149259202 ref XM_909026.3 | 3466 | 32 | 24.61% | 2.5927<br>29 | 39 | 24.58% | 3.163<br>43  | -       |
| 54725                        | 4387 | 32 | 30%    | 2.0484<br>16 | 16 | 14.22% | 1.025<br>356 | Cadm1   |
| 14854                        | 1857 | 32 | 59.34% | 4.8392<br>02 | 29 | 46.85% | 4.390<br>442 | Gss     |
| 69263                        | 1215 | 32 | 67.08% | 7.3962<br>13 | 26 | 60.08% | 6.016<br>157 | Rfc3    |
| 30853                        | 1551 | 32 | 15.80% | 5.7939<br>39 | 22 | 15.86% | 3.987<br>797 | Mlf2    |
| 67510                        | 1748 | 32 | 41.76% | 5.1409<br>6  | 28 | 48.51% | 4.503<br>381 | Fam18b  |
| 67049                        | 2012 | 32 | 51.09% | 4.4664<br>01 | 22 | 38.12% | 3.074<br>092 | Pus3    |
| 101185                       | 3153 | 32 | 37.93% | 2.8501<br>11 | 37 | 34%    | 3.299<br>133 | Pot1a   |
| 66067                        | 1318 | 32 | 56.68% | 6.8182<br>09 | 14 | 36.04% | 2.986<br>309 | Gtpbp8  |
| 19041                        | 6277 | 32 | 19.79% | 1.4316<br>39 | 23 | 15.88% | 1.030<br>144 | Ppl     |
| 50785                        | 3732 | 32 | 14.12% | 2.4079<br>31 | 20 | 12.78% | 1.506<br>643 | Hs6st1  |



|        |      |    |        |              |    |        |              |                   |
|--------|------|----|--------|--------------|----|--------|--------------|-------------------|
| 69833  | 612  | 32 | 78.27% | 14.683<br>66 | 54 | 83.82% | 24.80<br>644 | Polr2f            |
| 74528  | 2707 | 32 | 36.50% | 3.3196<br>89 | 37 | 37.13% | 3.842<br>692 | 8430406<br>I07Rik |
| 56705  | 3064 | 32 | 9.27%  | 2.9328<br>98 | 34 | 11.46% | 3.119<br>696 | Ranbp9            |
| 68735  | 526  | 32 | 82.32% | 17.084<br>41 | 37 | 76.05% | 19.77<br>598 | Mrps18c           |
| 319638 | 2716 | 32 | 42.75% | 3.3086<br>89 | 37 | 46.80% | 3.829<br>959 | Nt5dc1            |
| 230809 | 4766 | 32 | 27.86% | 1.8855<br>22 | 23 | 18.88% | 1.356<br>738 | Pdik11            |
| 74316  | 868  | 32 | 57.83% | 10.352<br>99 | 40 | 69.35% | 12.95<br>574 | Isca2             |
| 80909  | 4807 | 32 | 27.17% | 1.8694<br>4  | 11 | 10.19% | 0.643<br>34  | Gatsl2            |
| 433424 | 1305 | 32 | 48.43% | 6.8861<br>29 | 56 | 60.69% | 12.06<br>423 | Gm1347<br>6       |
| 66821  | 1829 | 32 | 55.06% | 4.9132<br>85 | 32 | 49.26% | 4.918<br>791 | Bcs11             |
| 93686  | 7048 | 32 | 19.75% | 1.2750<br>28 | 20 | 12.46% | 0.797<br>786 | Rbfox2            |
| 68142  | 6296 | 32 | 11.86% | 1.4273<br>19 | 22 | 10.09% | 0.982<br>381 | Ino80             |
| 13070  | 1774 | 32 | 57.33% | 5.0656<br>14 | 1  | 2.76%  | 0.158<br>478 | Cyp11a1           |
| 67775  | 1573 | 32 | 43.04% | 5.7129<br>05 | 45 | 53.85% | 8.042<br>775 | Rtp4              |
| 67770  | 2109 | 32 | 44.71% | 4.2609<br>76 | 28 | 45%    | 3.732<br>532 | 5830433<br>M19Rik |
| 21816  | 2854 | 32 | 41.10% | 3.1487<br>03 | 17 | 25.47% | 1.674<br>623 | Tgm1              |
| 735265 | 109  | 32 | 94.50% | 82.444<br>03 | 38 | 77.98% | 98.01<br>199 | Mir703            |
| 18436  | 2441 | 32 | 43.10% | 3.6814<br>42 | 54 | 60.06% | 6.219<br>394 | P2rx1             |
| 19167  | 1434 | 32 | 23.57% | 6.2666<br>66 | 24 | 28.52% | 4.705<br>266 | Psma3             |
| 22169  | 3215 | 32 | 35.93% | 2.7951<br>47 | 40 | 43.89% | 3.497<br>85  | Cmpk2             |
| 217119 | 3424 | 32 | 28.59% | 2.6245<br>32 | 15 | 18.98% | 1.231<br>628 | Xylt2             |
| 235533 | 2746 | 32 | 45.88% | 3.2725<br>41 | 19 | 28.73% | 1.945<br>249 | Gk5               |

|        |      |    |        |              |    |        |              |                   |
|--------|------|----|--------|--------------|----|--------|--------------|-------------------|
| 81845  | 1506 | 32 | 39.31% | 5.9670<br>64 | 28 | 42.23% | 5.227<br>032 | Gpank1            |
| 67725  | 2523 | 32 | 42.73% | 3.5617<br>91 | 21 | 29.96% | 2.340<br>045 | Nudt13            |
| 231842 | 2685 | 32 | 38.25% | 3.3468<br>9  | 33 | 42.20% | 3.455<br>348 | Amz1              |
| 15039  | 1758 | 32 | 28.73% | 5.1117<br>17 | 32 | 27.30% | 5.117<br>445 | H2-T22            |
| 66119  | 1026 | 32 | 6.73%  | 8.7586<br>73 | 28 | 7.02%  | 7.672<br>427 | Tomm6             |
| 78416  | 1072 | 32 | 70.90% | 8.3828<br>35 | 19 | 55.41% | 4.982<br>886 | Rnase6            |
| 276919 | 3448 | 32 | 36.83% | 2.6062<br>64 | 12 | 15.34% | 0.978<br>444 | Gemin4            |
| 66844  | 2055 | 32 | 23.11% | 4.3729<br>43 | 38 | 24.87% | 5.198<br>69  | Ormdl2            |
| 195040 | 1353 | 32 | 59.05% | 6.6418<br>32 | 20 | 47.67% | 4.155<br>797 | Tmem19<br>9       |
| 14158  | 3026 | 32 | 38.30% | 2.9697<br>29 | 51 | 50.40% | 4.738<br>309 | Fert2             |
| 79044  | 899  | 32 | 73.41% | 9.9959<br>94 | 27 | 78.31% | 8.443<br>572 | Mrps34            |
| 71609  | 1385 | 32 | 61.23% | 6.4883<br>75 | 25 | 54.73% | 5.074<br>723 | Tradd             |
| 74243  | 2840 | 32 | 34.47% | 3.1642<br>25 | 11 | 14.51% | 1.088<br>921 | 2210009<br>G21Rik |
| 117109 | 991  | 32 | 55.20% | 9.0680<br>11 | 31 | 66.80% | 8.794<br>48  | Pop5              |
| 54006  | 2362 | 32 | 42.55% | 3.8045<br>72 | 41 | 48.26% | 4.880<br>07  | Deaf1             |
| 14125  | 1026 | 32 | 71.25% | 8.7586<br>73 | 4  | 18.42% | 1.096<br>061 | Fcer1a            |
| 73750  | 4049 | 32 | 30.35% | 2.2194<br>12 | 25 | 21.83% | 1.735<br>859 | Whrn              |
| 216292 | 2039 | 32 | 52.13% | 4.4072<br>58 | 17 | 34.43% | 2.343<br>98  | BC0670<br>68      |
| 494448 | 5449 | 32 | 20.94% | 1.6491<br>83 | 18 | 13.40% | 0.928<br>705 | Cbx6              |
| 330064 | 3455 | 32 | 34.18% | 2.6009<br>84 | 19 | 18.55% | 1.546<br>065 | Slc5a6            |
| 11512  | 6038 | 32 | 23.24% | 1.4883<br>07 | 13 | 10.55% | 0.605<br>302 | Adcy6             |
| 12663  | 6117 | 32 | 23.02% | 1.4690<br>86 | 39 | 24.28% | 1.792<br>455 | Chml              |

|                                  |       |    |        |              |     |        |              |                   |
|----------------------------------|-------|----|--------|--------------|-----|--------|--------------|-------------------|
| gi 166295184 ref N<br>M_009319.2 | 1736  | 32 | 55.07% | 5.1764<br>97 | 34  | 59.50% | 5.506<br>192 | -                 |
| 13360                            | 2845  | 32 | 35.85% | 3.1586<br>64 | 26  | 31.88% | 2.569<br>29  | Dhcr7             |
| 52469                            | 718   | 32 | 87.05% | 12.515<br>88 | 30  | 79.39% | 11.74<br>678 | Coa3              |
| 23827                            | 2182  | 32 | 36.98% | 4.1184<br>23 | 30  | 38.13% | 3.865<br>348 | Bpnt1             |
| 241919                           | 8869  | 32 | 1.97%  | 1.0132<br>37 | 23  | 2.19%  | 0.729<br>08  | Slc7a14           |
| 18476                            | 892   | 32 | 69.06% | 10.074<br>44 | 26  | 67.49% | 8.194<br>654 | Pafah1b3          |
| 97998                            | 3300  | 32 | 30.30% | 2.7231<br>51 | 50  | 48.64% | 4.259<br>692 | Deptor            |
| 246229                           | 3571  | 32 | 31.17% | 2.5164<br>94 | 21  | 21.62% | 1.653<br>3   | Bivm              |
| 170753                           | 13849 | 32 | 10.61% | 0.6488<br>84 | 18  | 5.33%  | 0.365<br>406 | Zfp704            |
| 641376                           | 2920  | 32 | 36.40% | 3.0775<br>34 | 25  | 30.86% | 2.407<br>018 | Tomm40<br>1       |
| 67881                            | 1802  | 32 | 51.22% | 4.9869<br>03 | 24  | 49.56% | 3.744<br>368 | Mdp1              |
| 207474                           | 4822  | 32 | 24.91% | 1.8636<br>25 | 12  | 11.72% | 0.699<br>642 | Kctd12b           |
| 23821                            | 4194  | 32 | 26.25% | 2.1426<br>8  | 18  | 18.91% | 1.206<br>608 | Bace1             |
| 56737                            | 3062  | 32 | 38.83% | 2.9348<br>13 | 29  | 35.99% | 2.662<br>655 | Alg2              |
| 329540                           | 6416  | 32 | 21.12% | 1.4006<br>23 | 32  | 21.04% | 1.402<br>193 | 8430427<br>H17Rik |
| 244864                           | 1786  | 32 | 57%    | 5.0315<br>78 | 27  | 49.72% | 4.250<br>152 | Layn              |
| 545938                           | 3511  | 32 | 31.96% | 2.5594<br>98 | 18  | 20.19% | 1.441<br>331 | Zfp607            |
| 18799                            | 2651  | 32 | 37.04% | 3.3898<br>15 | 42  | 48.55% | 4.454<br>118 | Plcd1             |
| 68915                            | 4441  | 32 | 23.10% | 2.0235<br>08 | 22  | 19.21% | 1.392<br>721 | Vars2             |
| 11838                            | 3059  | 32 | 36.71% | 2.9376<br>92 | 101 | 71.66% | 9.282<br>48  | Arc               |
| 22245                            | 1966  | 32 | 37.89% | 4.5709<br>05 | 17  | 23.70% | 2.431<br>014 | Uck1              |
| 66514                            | 2274  | 32 | 43.93% | 3.9518<br>02 | 13  | 20.27% | 1.607<br>219 | Asrg11            |

|                                  |      |    |        |              |    |        |              |         |
|----------------------------------|------|----|--------|--------------|----|--------|--------------|---------|
| 170459                           | 2985 | 32 | 36.15% | 3.0105<br>19 | 23 | 29.92% | 2.166<br>235 | Stard4  |
| 105670                           | 3791 | 32 | 30.34% | 2.3704<br>56 | 38 | 28.25% | 2.818<br>071 | Rcctb2  |
| 241303                           | 4011 | 32 | 32.76% | 2.2404<br>38 | 9  | 10.60% | 0.630<br>829 | Fam78a  |
| gi 149249576 ref X<br>M_917391.3 | 5855 | 32 | 13.01% | 1.5348<br>25 | 28 | 11.80% | 1.344<br>477 | -       |
| 18514                            | 6910 | 32 | 10.03% | 1.3004<br>92 | 39 | 12.17% | 1.586<br>751 | Pbx1    |
| 14226                            | 1007 | 32 | 54.72% | 8.9239<br>31 | 23 | 58.49% | 6.421<br>263 | Fkbp1b  |
| 240066                           | 5321 | 32 | 23.51% | 1.6888<br>55 | 19 | 14.58% | 1.003<br>882 | Zfp870  |
| 70385                            | 2526 | 32 | 42.28% | 3.5575<br>61 | 23 | 37.77% | 2.559<br>862 | Ccdc99  |
| 209707                           | 4983 | 32 | 24.70% | 1.8034<br>11 | 23 | 18.82% | 1.297<br>654 | Lcor1   |
| 12497                            | 2500 | 32 | 39.80% | 3.5945<br>6  | 20 | 28.36% | 2.249<br>117 | Entpd6  |
| 240869                           | 3883 | 32 | 31.26% | 2.3142<br>93 | 9  | 10.33% | 0.651<br>624 | Zbtb37  |
| 52822                            | 4036 | 32 | 24.93% | 2.2265<br>61 | 35 | 28.12% | 2.438<br>03  | Rufy3   |
| 16818                            | 2171 | 32 | 47.86% | 4.1392<br>9  | 13 | 20.82% | 1.683<br>471 | Lck     |
| 74498                            | 3483 | 32 | 36.03% | 2.5800<br>74 | 18 | 21.36% | 1.452<br>918 | Gorasp1 |
| 320129                           | 6554 | 32 | 18.83% | 1.3711<br>32 | 26 | 14.83% | 1.115<br>293 | Adrbk2  |
| 244183                           | 2771 | 32 | 38.40% | 3.2430<br>17 | 42 | 40.17% | 4.261<br>229 | Trim30b |
| 66162                            | 337  | 32 | 81.01% | 26.665<br>87 | 39 | 78.34% | 32.53<br>545 | Bola2   |
| 19076                            | 1937 | 32 | 48.53% | 4.6393<br>39 | 23 | 40.32% | 3.338<br>261 | Prim2   |
| 433813                           | 1229 | 32 | 65.58% | 7.3119<br>6  | 22 | 55.25% | 5.032<br>606 | Pus11   |
| 18004                            | 4264 | 31 | 27.74% | 2.0416<br>45 | 22 | 18.62% | 1.450<br>533 | Nek1    |
| 80902                            | 3877 | 31 | 32.14% | 2.2454<br>41 | 45 | 33.02% | 3.263<br>163 | Zfp202  |
| 12902                            | 6207 | 31 | 19.27% | 1.4025<br>41 | 5  | 3.95%  | 0.226<br>47  | Cr2     |

|                                     |       |    |        |              |    |        |              |         |
|-------------------------------------|-------|----|--------|--------------|----|--------|--------------|---------|
| 227095                              | 1720  | 31 | 59.07% | 5.0613<br>8  | 30 | 58.84% | 4.903<br>599 | Hibch   |
| gi 142352841 ref N<br>M_007692.5    | 1707  | 31 | 23.49% | 5.0999<br>26 | 26 | 16.99% | 4.282<br>151 | -       |
| gi 158508433 ref N<br>M_026028.4    | 2166  | 31 | 49.35% | 4.0191<br>94 | 10 | 20.13% | 1.297<br>967 | -       |
| 63872                               | 1530  | 31 | 59.93% | 5.6899<br>18 | 25 | 50.33% | 4.593<br>785 | Zfp296  |
| 67020                               | 1585  | 31 | 48.39% | 5.4924<br>76 | 66 | 49.84% | 11.70<br>676 | Tmem88  |
| 52563                               | 4134  | 31 | 26.05% | 2.1058<br>48 | 19 | 18.09% | 1.292<br>127 | Cdc23   |
| 14088                               | 3169  | 31 | 22.12% | 2.7471<br>04 | 42 | 28.65% | 3.726<br>054 | Fance   |
| 14430                               | 2000  | 31 | 39.70% | 4.3527<br>87 | 24 | 37.90% | 3.373<br>676 | Galt    |
| 211006                              | 1925  | 31 | 54.03% | 4.5223<br>76 | 11 | 20.68% | 1.606<br>512 | Sepsecs |
| 105675                              | 1560  | 31 | 50.06% | 5.5804<br>96 | 32 | 52.18% | 5.766<br>967 | Ppif    |
| 12892                               | 3186  | 31 | 32.55% | 2.7324<br>46 | 38 | 37.29% | 3.353<br>204 | Cpox    |
| 52710                               | 2700  | 31 | 35.15% | 3.2242<br>87 | 12 | 20.81% | 1.249<br>51  | Slc52a2 |
| 360213                              | 3132  | 31 | 39.66% | 2.7795<br>57 | 18 | 18.33% | 1.615<br>745 | Trim46  |
| 338364                              | 3050  | 31 | 32.16% | 2.8542<br>87 | 10 | 15.97% | 0.921<br>769 | Trim65  |
| 217011                              | 1771  | 31 | 54.04% | 4.9156<br>26 | 21 | 45.57% | 3.333<br>672 | Nle1    |
| 231003                              | 3014  | 31 | 40.71% | 2.8883<br>79 | 31 | 36.99% | 2.891<br>616 | Klh17   |
| 237926                              | 4167  | 31 | 28.75% | 2.0891<br>71 | 19 | 16.63% | 1.281<br>894 | Rsad1   |
| 11931                               | 2422  | 31 | 40.92% | 3.5943<br>74 | 16 | 25.10% | 1.857<br>24  | Atp1b1  |
| 105663                              | 2839  | 31 | 42.97% | 3.0664<br>23 | 18 | 27.26% | 1.782<br>499 | Thtpa   |
| gi 149233903 ref X<br>M_001479477.1 | 10009 | 31 | 3.71%  | 0.8697<br>75 | 20 | 4.56%  | 0.561<br>774 | -       |
| 232449                              | 1688  | 31 | 59.12% | 5.1573<br>3  | 18 | 41.05% | 2.997<br>935 | Dera    |
| 1E+08                               | 4296  | 31 | 26.65% | 2.0264<br>37 | 37 | 23.88% | 2.421<br>361 | Gm3374  |

|                                     |      |    |        |              |    |        |              |                   |
|-------------------------------------|------|----|--------|--------------|----|--------|--------------|-------------------|
| 18938                               | 919  | 31 | 37%    | 9.4728<br>77 | 23 | 38.19% | 7.036<br>14  | Ppp1r14<br>b      |
| 99100                               | 5768 | 31 | 24.46% | 1.5092<br>88 | 17 | 13.26% | 0.828<br>602 | Cep152            |
| 22152                               | 1758 | 31 | 52.56% | 4.9519<br>76 | 12 | 24.29% | 1.919<br>042 | Tubb3             |
| 320742                              | 2041 | 31 | 17.79% | 4.2653<br>47 | 23 | 17.74% | 3.168<br>159 | A230072<br>C01Rik |
| 70536                               | 1924 | 31 | 46.88% | 4.5247<br>27 | 27 | 48.75% | 3.945<br>307 | Qpct              |
| 69752                               | 1100 | 31 | 68.55% | 7.9141<br>58 | 27 | 63.91% | 6.900<br>701 | Zfp511            |
| 67471                               | 3057 | 31 | 39.12% | 2.8477<br>51 | 22 | 23.09% | 2.023<br>249 | Gpatch1           |
| gi 149259462 ref X<br>M_001474880.1 | 2742 | 31 | 30.49% | 3.1748<br>99 | 19 | 20.86% | 1.948<br>087 | -                 |
| 16579                               | 3907 | 31 | 34.20% | 2.2281<br>99 | 44 | 38.67% | 3.166<br>149 | Kifap3            |
| 70394                               | 1665 | 31 | 60.42% | 5.2285<br>73 | 39 | 59.52% | 6.585<br>253 | Kptn              |
| gi 142368010 ref N<br>M_145522.3    | 1737 | 31 | 50.32% | 5.0118<br>44 | 27 | 44.91% | 4.370<br>047 | -                 |
| 317717                              | 3992 | 31 | 26%    | 2.1807<br>55 | 22 | 21.54% | 1.549<br>367 | Sec22a            |
| 12695                               | 7305 | 31 | 17.77% | 1.1917<br>28 | 25 | 13.57% | 0.962<br>148 | Inadl             |
| 11745                               | 1619 | 31 | 23.59% | 5.3771<br>3  | 41 | 23.84% | 7.119<br>658 | Anxa3             |
| 19044                               | 1821 | 31 | 53.10% | 4.7806<br>56 | 34 | 53.21% | 5.249<br>175 | Ppox              |
| 76429                               | 1607 | 31 | 58.37% | 5.4172<br>83 | 28 | 55.07% | 4.898<br>513 | Lhpp              |
| 12454                               | 2632 | 31 | 23.44% | 3.3075<br>89 | 25 | 19.38% | 2.670<br>4   | Ccnk              |
| 74480                               | 7120 | 31 | 18.64% | 1.2226<br>93 | 14 | 9.14%  | 0.552<br>803 | Samd4             |
| 236451                              | 1163 | 31 | 53.83% | 7.4854<br>46 | 43 | 48.93% | 10.39<br>467 | Gm4902            |
| 11781                               | 1734 | 31 | 57.90% | 5.0205<br>15 | 28 | 56.81% | 4.539<br>741 | Ap4m1             |
| 71971                               | 2721 | 31 | 36.53% | 3.1994<br>02 | 21 | 32.89% | 2.169<br>766 | Zswim1            |
| gi 141801751 ref N<br>M_028072.4    | 4573 | 31 | 25.93% | 1.9036<br>9  | 10 | 10.54% | 0.614<br>782 | -                 |

|                                     |      |    |        |              |    |        |              |                   |
|-------------------------------------|------|----|--------|--------------|----|--------|--------------|-------------------|
| 107197                              | 847  | 31 | 69.07% | 10.278<br>13 | 19 | 52.89% | 6.306<br>557 | AI46249<br>3      |
| 320007                              | 4281 | 31 | 24.32% | 2.0335<br>37 | 10 | 10.35% | 0.656<br>715 | Sidt1             |
| gi 148540024 ref N<br>M_029862.3    | 1608 | 31 | 53.11% | 5.4139<br>14 | 24 | 46.14% | 4.196<br>114 | -                 |
| 408065                              | 4079 | 31 | 26.43% | 2.1342<br>42 | 26 | 21.82% | 1.792<br>015 | Zfp456            |
| 225659                              | 3979 | 31 | 28.60% | 2.1878<br>8  | 28 | 28.30% | 1.978<br>364 | Cep76             |
| 54324                               | 5420 | 31 | 22.66% | 1.6061<br>94 | 24 | 17.14% | 1.244<br>899 | Arhgef5           |
| 56314                               | 6486 | 31 | 18.07% | 1.3422<br>1  | 42 | 14.15% | 1.820<br>516 | Zfp113            |
| 71583                               | 2159 | 31 | 43.68% | 4.0322<br>25 | 44 | 52.94% | 5.729<br>572 | 9130008<br>F23Rik |
| 72065                               | 3562 | 31 | 9.63%  | 2.4440<br>13 | 23 | 8.82%  | 1.815<br>332 | Rap2c             |
| 11542                               | 1797 | 31 | 55.76% | 4.8445<br>04 | 13 | 26.04% | 2.033<br>843 | Adora3            |
| 23894                               | 1707 | 31 | 57.88% | 5.0999<br>26 | 21 | 39.78% | 3.458<br>66  | Gtf2h2            |
| 67103                               | 2104 | 31 | 36.50% | 4.1376<br>3  | 38 | 47.15% | 5.077<br>617 | Ptgr1             |
| 98365                               | 1152 | 31 | 64.32% | 7.5569<br>22 | 24 | 59.64% | 5.857<br>076 | Slamf9            |
| 380921                              | 3967 | 31 | 32.87% | 2.1944<br>98 | 16 | 17.62% | 1.133<br>913 | Dgkh              |
| 18761                               | 3313 | 31 | 38.51% | 2.6277<br>01 | 3  | 4.44%  | 0.254<br>579 | Prkcq             |
| 18798                               | 3692 | 31 | 29.39% | 2.3579<br>56 | 32 | 33.02% | 2.436<br>747 | Plcb4             |
| 80905                               | 2580 | 31 | 40.97% | 3.3742<br>53 | 18 | 31.09% | 1.961<br>439 | Polh              |
| 68597                               | 4625 | 31 | 21.12% | 1.8822<br>86 | 33 | 23.05% | 2.005<br>969 | Ccdc167           |
| 117591                              | 3602 | 31 | 35.15% | 2.4168<br>72 | 29 | 29.57% | 2.263<br>479 | Slc2a9            |
| 100732                              | 1921 | 31 | 50.96% | 4.5317<br>93 | 42 | 56.27% | 6.146<br>729 | Mapre3            |
| gi 149254975 ref X<br>M_001477140.1 | 855  | 31 | 13.57% | 10.181<br>96 | 25 | 14.15% | 8.220<br>458 | -                 |
| 70454                               | 4342 | 31 | 28.72% | 2.0049<br>69 | 28 | 21.58% | 1.812<br>969 | Cenpl             |

|                                     |      |    |        |              |    |        |              |                   |
|-------------------------------------|------|----|--------|--------------|----|--------|--------------|-------------------|
| 68114                               | 3717 | 31 | 26.85% | 2.3420<br>97 | 17 | 19.34% | 1.285<br>815 | Mum1              |
| gi 149262338 ref X<br>M_001478949.1 | 5313 | 31 | 19.93% | 1.6385<br>42 | 17 | 14.74% | 0.899<br>562 | -                 |
| 20733                               | 1477 | 31 | 54.23% | 5.8940<br>92 | 19 | 28.98% | 3.616<br>556 | Spint2            |
| 72114                               | 1894 | 31 | 46.67% | 4.5963<br>96 | 32 | 50.21% | 4.749<br>984 | Zbed3             |
| 211323                              | 2103 | 31 | 49.64% | 4.1395<br>98 | 11 | 23.59% | 1.470<br>536 | Nrg1              |
| 73916                               | 2540 | 31 | 35.08% | 3.4273<br>91 | 33 | 34.80% | 3.652<br>602 | Ift57             |
| 105014                              | 1475 | 31 | 59.66% | 5.9020<br>84 | 28 | 50.58% | 5.336<br>888 | Rdh14             |
| 17395                               | 3185 | 31 | 37.11% | 2.7333<br>04 | 41 | 47.32% | 3.619<br>066 | Mmp9              |
| 21827                               | 3205 | 30 | 37.07% | 2.6286<br>27 | 19 | 24.99% | 1.666<br>663 | Thbs3             |
| 68303                               | 2949 | 30 | 35.84% | 2.8568<br>15 | 17 | 21.97% | 1.620<br>676 | Fam114a<br>1      |
| 382639                              | 3478 | 30 | 33.09% | 2.4222<br>97 | 24 | 27.29% | 1.940<br>009 | Zbtb42            |
| 70123                               | 856  | 30 | 67.52% | 9.8419<br>96 | 31 | 71.96% | 10.18<br>146 | 2210013<br>O21Rik |
| 83704                               | 3315 | 30 | 37.74% | 2.5414<br>02 | 23 | 26.64% | 1.950<br>592 | Slc12a9           |
| 64659                               | 1970 | 30 | 27.21% | 4.2765<br>22 | 26 | 28.17% | 3.710<br>473 | Mrps14            |
| 140721                              | 4762 | 30 | 24.97% | 1.7691<br>62 | 12 | 11.17% | 0.708<br>458 | Caskin2           |
| 215693                              | 3520 | 30 | 30.77% | 2.3933<br>95 | 19 | 20.37% | 1.517<br>515 | Zmat1             |
| 237823                              | 6369 | 30 | 19.38% | 1.3227<br>74 | 17 | 11.13% | 0.750<br>412 | Pfas              |
| 71710                               | 5675 | 30 | 22.77% | 1.4845<br>37 | 17 | 13%    | 0.842<br>18  | Lrrcc1            |
| 16411                               | 4025 | 30 | 28.77% | 2.0931<br>05 | 26 | 25.79% | 1.816<br>057 | Itgax             |
| 68327                               | 1224 | 30 | 61.76% | 6.8829<br>65 | 30 | 46.49% | 6.890<br>678 | 0610007<br>P22Rik |
| 72230                               | 3839 | 30 | 33.29% | 2.1945<br>17 | 30 | 29.70% | 2.196<br>976 | Zfp558            |
| 67840                               | 2321 | 30 | 24.08% | 3.6297<br>93 | 29 | 28.95% | 3.512<br>732 | Mrp63             |



|        |      |    |        |              |    |        |              |              |
|--------|------|----|--------|--------------|----|--------|--------------|--------------|
| 65257  | 3225 | 30 | 29.95% | 2.6123<br>25 | 26 | 28.19% | 2.266<br>552 | Asb3         |
| 14283  | 1705 | 30 | 28.39% | 4.9412<br>02 | 35 | 26.63% | 5.771<br>195 | Fos11        |
| 408064 | 870  | 30 | 74.94% | 9.6836<br>19 | 27 | 61.95% | 8.725<br>024 | BC0640<br>78 |
| 64295  | 1343 | 30 | 62.32% | 6.2730<br>82 | 19 | 39.84% | 3.977<br>404 | Tmub1        |
| 15587  | 1872 | 30 | 44.39% | 4.5004       | 32 | 52.67% | 4.805<br>806 | Hyal2        |
| 237339 | 3411 | 30 | 31.75% | 2.4698<br>77 | 12 | 13.93% | 0.989<br>058 | L3mbt13      |
| 80860  | 2162 | 30 | 43.39% | 3.8967<br>39 | 38 | 42.74% | 4.941<br>4   | Ghdc         |
| 230075 | 534  | 30 | 82.58% | 15.776<br>68 | 49 | 86.14% | 25.79<br>746 | Ndufb6       |
| 215201 | 3337 | 30 | 32.66% | 2.5246<br>48 | 29 | 28.20% | 2.443<br>228 | Trmt2b       |
| 72960  | 2011 | 30 | 44.80% | 4.1893<br>33 | 27 | 41.47% | 3.774<br>625 | Top1mt       |
| 382137 | 1978 | 30 | 46.87% | 4.2592<br>26 | 19 | 32.91% | 2.700<br>533 | Fdxacb1      |
| 13202  | 609  | 30 | 84.24% | 13.833<br>74 | 30 | 80.62% | 13.84<br>924 | Ddt          |
| 17187  | 2005 | 30 | 13.32% | 4.2018<br>7  | 19 | 9.83%  | 2.664<br>166 | Max          |
| 14073  | 3816 | 30 | 31.47% | 2.2077<br>43 | 19 | 21.36% | 1.399<br>804 | Faah         |
| 66632  | 2700 | 30 | 35.11% | 3.1202<br>77 | 38 | 47.85% | 3.956<br>78  | Atpbd4       |
| 242341 | 2518 | 30 | 42.65% | 3.3458<br>1  | 9  | 17.51% | 1.004<br>868 | Atp6v0d<br>2 |
| 432442 | 3140 | 30 | 34.65% | 2.6830<br>41 | 26 | 28.22% | 2.327<br>908 | Akap7        |
| 73338  | 3689 | 30 | 29.17% | 2.2837<br>49 | 22 | 18.76% | 1.676<br>626 | Itpr11       |
| 319634 | 4654 | 30 | 26.43% | 1.8102<br>17 | 31 | 26.30% | 1.872<br>654 | Efcab5       |
| 68350  | 3732 | 30 | 20.07% | 2.2574<br>35 | 14 | 15.70% | 1.054<br>65  | Mul1         |
| 14009  | 4146 | 30 | 25.23% | 2.0320<br>19 | 18 | 17.85% | 1.220<br>577 | Etv1         |
| 66628  | 939  | 30 | 68.80% | 8.9720<br>44 | 30 | 74.12% | 8.982<br>098 | Thg11        |

|                                     |      |    |        |              |    |        |              |                   |
|-------------------------------------|------|----|--------|--------------|----|--------|--------------|-------------------|
| gi 27881426 ref N<br>M_020611.3     | 1733 | 30 | 30.41% | 4.8613<br>67 | 40 | 33.53% | 6.489<br>086 | -                 |
| 101966                              | 679  | 30 | 38.14% | 12.407<br>58 | 27 | 32.55% | 11.17<br>934 | D8ErtD7<br>38e    |
| 399101                              | 437  | 30 | 73%    | 19.278<br>6  | 23 | 67.28% | 14.79<br>682 | Snhg3             |
| 231430                              | 1342 | 30 | 55.07% | 6.2777<br>56 | 15 | 45.68% | 3.142<br>396 | Cox18             |
| 55927                               | 1335 | 30 | 60.82% | 6.3106<br>73 | 23 | 57.60% | 4.843<br>605 | Hes6              |
| gi 149253859 ref X<br>M_001474408.1 | 2157 | 30 | 33.19% | 3.9057<br>71 | 29 | 33.84% | 3.779<br>81  | -                 |
| 66179                               | 1243 | 30 | 61.06% | 6.7777<br>55 | 41 | 78.36% | 9.273<br>311 | 1110031<br>I02Rik |
| 68119                               | 1616 | 30 | 16.21% | 5.2133<br>35 | 29 | 17.57% | 5.045<br>204 | Cmtm3             |
| 213350                              | 1497 | 30 | 52.71% | 5.6277<br>55 | 19 | 53.31% | 3.568<br>239 | Pddc1             |
| 50883                               | 2247 | 30 | 46.86% | 3.7493<br>32 | 18 | 30.31% | 2.252<br>12  | Chek2             |
| gi 149260277 ref X<br>M_001475085.1 | 1618 | 30 | 3.58%  | 5.2068<br>91 | 38 | 3.65%  | 6.602<br>786 | -                 |
| 53978                               | 5701 | 30 | 20.72% | 1.4777<br>67 | 21 | 14.35% | 1.035<br>596 | Lpar2             |
| 67460                               | 3082 | 30 | 33.29% | 2.7335<br>33 | 26 | 30.40% | 2.371<br>717 | Decr1             |
| 215449                              | 1937 | 30 | 8.16%  | 4.3493<br>8  | 27 | 7.59%  | 3.918<br>829 | Rap1b             |
| 70693                               | 4475 | 30 | 28.63% | 1.8826<br>25 | 26 | 24.09% | 1.633<br>437 | Gpr125            |
| 228491                              | 4276 | 30 | 28.23% | 1.9702<br>41 | 4  | 4.58%  | 0.262<br>993 | Zfp770            |
| 74080                               | 2160 | 30 | 44.40% | 3.9003<br>47 | 17 | 27.50% | 2.212<br>673 | Nmnat3            |
| 22171                               | 3808 | 30 | 31.12% | 2.2123<br>82 | 31 | 24.95% | 2.288<br>689 | Tyms              |
| 232371                              | 3010 | 30 | 37.81% | 2.7989<br>2  | 25 | 31.40% | 2.335<br>047 | C1rl              |
| 1E+08                               | 2889 | 30 | 32.64% | 2.9161<br>47 | 26 | 25.16% | 2.530<br>16  | Gm2881            |
| 214239                              | 4716 | 30 | 26.65% | 1.7864<br>18 | 10 | 8.48%  | 0.596<br>14  | A430105<br>I19Rik |
| 116905                              | 2103 | 30 | 45.93% | 4.0060<br>62 | 8  | 14.22% | 1.069<br>48  | Dph1              |

|                                 |      |    |        |              |    |        |              |              |
|---------------------------------|------|----|--------|--------------|----|--------|--------------|--------------|
| 106952                          | 5266 | 30 | 23.40% | 1.5998<br>38 | 26 | 19.77% | 1.388<br>08  | Arap3        |
| 56226                           | 2861 | 30 | 39.46% | 2.9446<br>87 | 7  | 10.31% | 0.687<br>864 | Espn         |
| 93734                           | 3056 | 30 | 20.75% | 2.7567<br>9  | 26 | 8.54%  | 2.391<br>895 | Mpv171       |
| 74335                           | 2422 | 30 | 42.53% | 3.4784<br>26 | 16 | 22.09% | 1.857<br>24  | Xrcc3        |
| 14651                           | 1197 | 30 | 58.81% | 7.0382<br>2  | 31 | 64.08% | 7.280<br>977 | Hagh         |
| 320209                          | 4167 | 30 | 30.09% | 2.0217<br>78 | 17 | 19.17% | 1.146<br>958 | Ddx11        |
| 68209                           | 646  | 30 | 78.48% | 13.041<br>41 | 26 | 79.88% | 11.31<br>522 | Rnaseh2<br>c |
| gi 62388881 ref N<br>M_172267.2 | 1348 | 30 | 68.99% | 6.2498<br>14 | 9  | 31.31% | 1.877<br>045 | -            |
| 74754                           | 4028 | 30 | 30.16% | 2.0915<br>46 | 5  | 6.08%  | 0.348<br>982 | Dhcr24       |
| 102791                          | 1656 | 30 | 59.72% | 5.0874<br>09 | 10 | 25.30% | 1.697<br>703 | Tcta         |
| 53951                           | 4237 | 30 | 22.45% | 1.9883<br>76 | 18 | 14.18% | 1.194<br>362 | Ccdc75       |
| 16907                           | 3389 | 30 | 35.97% | 2.4859<br>1  | 28 | 31.16% | 2.322<br>783 | Lmnb2        |
| 232878                          | 2620 | 30 | 40.15% | 3.2155<br>53 | 22 | 33.74% | 2.360<br>715 | Zscan22      |
| 20555                           | 1881 | 30 | 50.93% | 4.4788<br>67 | 20 | 35.94% | 2.989<br>257 | Slfn1        |
| 67178                           | 789  | 30 | 78.33% | 10.677<br>76 | 19 | 46.13% | 6.770<br>157 | Zmat5        |
| 30059                           | 682  | 30 | 80.35% | 12.353       | 39 | 69.79% | 16.07<br>69  | Timm10       |
| 18567                           | 1121 | 30 | 65.39% | 7.5153<br>87 | 43 | 74.40% | 10.78<br>413 | Pdcd2        |
| 50501                           | 1513 | 30 | 59.62% | 5.5682<br>41 | 27 | 46.86% | 5.017<br>033 | Prok2        |
| 101142                          | 2314 | 30 | 48.96% | 3.6407<br>73 | 21 | 32.63% | 2.551<br>397 | Itfg2        |
| 228730                          | 2150 | 30 | 42.93% | 3.9184<br>88 | 38 | 50.33% | 4.968<br>98  | Plk1s1       |
| 68291                           | 2364 | 30 | 44.97% | 3.5637<br>69 | 24 | 32.66% | 2.854<br>21  | Mto1         |
| 67800                           | 2251 | 30 | 42.74% | 3.7426<br>69 | 25 | 38.25% | 3.122<br>386 | Dgat2        |

|                                  |      |    |        |              |    |        |              |                   |
|----------------------------------|------|----|--------|--------------|----|--------|--------------|-------------------|
| 231004                           | 2610 | 30 | 19.92% | 3.2278<br>73 | 24 | 22.34% | 2.585<br>192 | Samd11            |
| 74748                            | 2040 | 30 | 42.89% | 4.1297<br>79 | 50 | 55%    | 6.890<br>678 | Slamf8            |
| 110012                           | 1101 | 30 | 71.57% | 7.6519<br>06 | 17 | 55.95% | 4.340<br>939 | Gm1651<br>7       |
| 328780                           | 1216 | 30 | 62.91% | 6.9282<br>47 | 3  | 12.09% | 0.693<br>601 | Prss34            |
| 66801                            | 1654 | 29 | 42.08% | 4.9237<br>75 | 34 | 50.85% | 5.779<br>171 | Prkrip1           |
| 239554                           | 4910 | 29 | 22.02% | 1.6586<br>4  | 10 | 8.49%  | 0.572<br>586 | Foxred2           |
| 236604                           | 2858 | 29 | 20.36% | 2.8495<br>19 | 13 | 12.84% | 1.278<br>802 | Pisd-ps1          |
| 217057                           | 2999 | 29 | 29.04% | 2.7155<br>46 | 16 | 19.37% | 1.499<br>911 | Pthr2             |
| 211151                           | 672  | 29 | 74.40% | 12.118<br>93 | 22 | 66.82% | 9.203<br>977 | Churc1            |
| 381760                           | 1489 | 29 | 30.36% | 5.4693<br>91 | 22 | 19.21% | 4.153<br>843 | Ssbp1             |
| 212706                           | 2593 | 29 | 37.95% | 3.1407<br>34 | 27 | 33.63% | 2.927<br>409 | N4bp3             |
| 77045                            | 3809 | 29 | 30.74% | 2.1380<br>74 | 17 | 20.22% | 1.254<br>758 | Bcl7a             |
| 105439                           | 2757 | 29 | 36.96% | 2.9539<br>08 | 9  | 14.25% | 0.917<br>757 | Slain1            |
| 74196                            | 2839 | 29 | 38.53% | 2.8685<br>89 | 41 | 43.08% | 4.060<br>136 | Ttc27             |
| 76522                            | 768  | 29 | 70.31% | 10.604<br>07 | 31 | 71.22% | 11.34<br>809 | Naa38             |
| gi 133892660 ref N<br>M_026712.2 | 1117 | 29 | 57.83% | 7.2908<br>9  | 27 | 66.16% | 6.795<br>677 | -                 |
| 231279                           | 3978 | 29 | 28%    | 2.0472<br>41 | 21 | 21.04% | 1.484<br>146 | Guf1              |
| 22626                            | 2077 | 29 | 51.42% | 3.9210<br>03 | 32 | 45.74% | 4.331<br>473 | Slc23a3           |
| 27883                            | 1529 | 29 | 54.94% | 5.3263<br>07 | 16 | 31.52% | 2.941<br>945 | D16H22<br>S680E   |
| 170789                           | 1161 | 29 | 71.32% | 7.0145<br>77 | 26 | 58.74% | 6.295<br>979 | Acot8             |
| 67105                            | 1315 | 29 | 66.84% | 6.1930<br>98 | 32 | 64.79% | 6.841<br>421 | 1700034<br>H14Rik |
| 29857                            | 1905 | 29 | 46.61% | 4.2750<br>26 | 21 | 30.08% | 3.099<br>177 | Mapk12            |

|                                     |       |    |        |              |    |        |              |                   |
|-------------------------------------|-------|----|--------|--------------|----|--------|--------------|-------------------|
| 57344                               | 1752  | 29 | 47.72% | 4.6483<br>58 | 47 | 65.81% | 7.541<br>989 | As3mt             |
| gi 149265189 ref X<br>M_001473268.1 | 6131  | 29 | 13.06% | 1.3283<br>19 | 24 | 9.82%  | 1.100<br>53  | -                 |
| gi 142363832 ref N<br>M_013888.2    | 1224  | 29 | 54.58% | 6.6535<br>33 | 24 | 62.42% | 5.512<br>542 | -                 |
| 17868                               | 4163  | 29 | 22.24% | 1.9562<br>63 | 29 | 22.05% | 1.958<br>455 | Mybpc3            |
| gi 160333825 ref N<br>M_001009575.4 | 2826  | 29 | 34.11% | 2.8817<br>85 | 31 | 38.85% | 3.083<br>981 | -                 |
| 17319                               | 554   | 29 | 42.78% | 14.700<br>22 | 18 | 42.42% | 9.134<br>502 | Mif               |
| 107999                              | 1615  | 29 | 45.51% | 5.0426<br>77 | 24 | 29.41% | 4.177<br>927 | Gtpbp6            |
| 56068                               | 3109  | 29 | 34.13% | 2.6194<br>67 | 14 | 18.01% | 1.265<br>988 | Ammecr<br>1       |
| 15476                               | 1685  | 29 | 46.29% | 4.8331<br>89 | 18 | 38.28% | 3.003<br>272 | Hs3st1            |
| 54610                               | 4451  | 29 | 22%    | 1.8296<br>84 | 30 | 26.26% | 1.894<br>898 | Tbc1d8            |
| 66241                               | 1595  | 29 | 51.03% | 5.1059<br>08 | 29 | 47.96% | 5.111<br>63  | Tmem9             |
| 73847                               | 1907  | 29 | 49.50% | 4.2705<br>42 | 36 | 50.45% | 5.307<br>304 | Fam110a           |
| 75985                               | 2007  | 29 | 49.83% | 4.0577<br>6  | 10 | 18.24% | 1.400<br>796 | Rab30             |
| 23900                               | 452   | 29 | 85.62% | 18.017<br>53 | 28 | 87.39% | 17.41<br>573 | Hcst              |
| 240697                              | 2553  | 29 | 17.20% | 3.1899<br>43 | 38 | 12.34% | 4.184<br>609 | 6030422<br>M02Rik |
| 29805                               | 1262  | 29 | 56.97% | 6.4531<br>89 | 20 | 53.33% | 4.455<br>462 | Znhit2            |
| 78751                               | 4916  | 29 | 24.39% | 1.6566<br>16 | 16 | 15.03% | 0.915<br>019 | Zc3h6             |
| 101835                              | 3411  | 29 | 26.85% | 2.3875<br>47 | 19 | 14.31% | 1.566<br>008 | AW1461<br>54      |
| 79196                               | 3994  | 29 | 30.10% | 2.0390<br>4  | 4  | 4.91%  | 0.281<br>562 | Osbp15            |
| gi 142362902 ref N<br>M_026500.2    | 2159  | 29 | 36.45% | 3.7720<br>81 | 30 | 35.90% | 3.906<br>526 | -                 |
| 269774                              | 19363 | 29 | 5.61%  | 0.4205<br>92 | 15 | 3.25%  | 0.217<br>791 | Aak1              |
| 320506                              | 3046  | 29 | 30.89% | 2.6736<br>45 | 13 | 16.74% | 1.199<br>874 | Lmbrd2            |

|                                     |      |    |        |              |    |        |              |                   |
|-------------------------------------|------|----|--------|--------------|----|--------|--------------|-------------------|
| 327655                              | 5559 | 29 | 20.36% | 1.4649<br>98 | 22 | 15.74% | 1.112<br>623 | Ppip5k1           |
| 30805                               | 2260 | 29 | 38.58% | 3.6035<br>06 | 24 | 39.38% | 2.985<br>554 | Slc22a4           |
| 207777                              | 7633 | 29 | 15.98% | 1.0669<br>36 | 14 | 8.71%  | 0.515<br>65  | Bzrap1            |
| 20630                               | 775  | 29 | 53.16% | 10.508<br>29 | 41 | 57.29% | 14.87<br>319 | Snrpc             |
| 11651                               | 2707 | 29 | 8.76%  | 3.0084<br>68 | 21 | 9.09%  | 2.180<br>987 | Akt1              |
| 236904                              | 4001 | 29 | 22.32% | 2.0354<br>72 | 35 | 16.92% | 2.459<br>357 | Klhl15            |
| 68332                               | 987  | 29 | 64.64% | 8.2511<br>89 | 30 | 61.70% | 8.545<br>278 | Sdhaf1            |
| 24082                               | 1267 | 29 | 65.19% | 6.4277<br>22 | 49 | 72.77% | 10.87<br>28  | Gm1651<br>6       |
| 12615                               | 1337 | 29 | 52.95% | 6.0911<br>92 | 37 | 60.81% | 7.780<br>23  | Cenpa             |
| 58182                               | 4073 | 29 | 27.11% | 1.9994<br>9  | 10 | 11.74% | 0.690<br>252 | Prokr1            |
| 230376                              | 3719 | 29 | 26.70% | 2.1898<br>16 | 22 | 22.02% | 1.663<br>101 | Haus6             |
| 27221                               | 3308 | 29 | 29.78% | 2.4618<br>88 | 25 | 25.15% | 2.124<br>695 | Chaf1a            |
| 625054                              | 2057 | 29 | 48.27% | 3.9591<br>27 | 30 | 54.25% | 4.100<br>238 | Gm6548            |
| 233893                              | 2508 | 29 | 40.03% | 3.2471<br>79 | 21 | 30.50% | 2.354<br>04  | Zfp764            |
| gi 149255622 ref X<br>M_001476590.1 | 400  | 29 | 89%    | 20.359<br>81 | 16 | 70.50% | 11.24<br>559 | -                 |
| 244329                              | 4636 | 29 | 25.02% | 1.7566<br>7  | 26 | 22.63% | 1.576<br>711 | Mcp1              |
| 214639                              | 1390 | 29 | 57.05% | 5.8589<br>38 | 52 | 65.40% | 10.51<br>745 | 4930486<br>L24Rik |
| 20719                               | 1654 | 29 | 16.14% | 4.9237<br>75 | 27 | 10.04% | 4.589<br>342 | Serpinb6<br>a     |
| 54448                               | 883  | 29 | 74.41% | 9.2230<br>17 | 23 | 56.06% | 7.323<br>004 | Il1f6             |
| 217473                              | 2458 | 29 | 41.66% | 3.3132<br>32 | 19 | 31%    | 2.173<br>171 | Ankmy2            |
| 106740                              | 1088 | 29 | 65.07% | 7.4852<br>24 | 21 | 55.97% | 5.426<br>409 | LOC106<br>740     |
| 13368                               | 2073 | 29 | 42.21% | 3.9285<br>69 | 25 | 41.73% | 3.390<br>493 | Dffb              |

|        |      |    |        |              |    |        |              |                   |
|--------|------|----|--------|--------------|----|--------|--------------|-------------------|
| 224691 | 2337 | 29 | 42.70% | 3.4847<br>77 | 19 | 30.42% | 2.285<br>688 | Zfp472            |
| 20969  | 3057 | 29 | 36.34% | 2.6640<br>25 | 26 | 35.13% | 2.391<br>113 | Sdc1              |
| 70591  | 4536 | 29 | 24.12% | 1.7953<br>98 | 22 | 17.15% | 1.363<br>552 | 5730455<br>P16Rik |
| 75458  | 1800 | 29 | 33.33% | 4.5244<br>02 | 33 | 34.06% | 5.154<br>227 | Cklf              |
| 73162  | 1670 | 29 | 51.32% | 4.8766<br>01 | 29 | 56.95% | 4.882<br>066 | Otud3             |
| 16923  | 2498 | 29 | 15.57% | 3.2601<br>78 | 19 | 10.21% | 2.138<br>372 | Sh2b3             |
| 216820 | 1582 | 29 | 41.78% | 5.1478<br>66 | 24 | 42.48% | 4.265<br>077 | Dhrs7b            |
| 67711  | 1082 | 29 | 60.91% | 7.5267<br>32 | 23 | 54.07% | 5.976<br>167 | Nsmce1            |
| 70681  | 2499 | 29 | 35.37% | 3.2588<br>73 | 12 | 20.37% | 1.350<br>01  | Fam175a           |
| 22698  | 3890 | 29 | 28.17% | 2.0935<br>54 | 15 | 14.65% | 1.084<br>086 | Zfp39             |
| 17311  | 5450 | 29 | 21.78% | 1.4942<br>98 | 84 | 50.70% | 4.333<br>162 | Kitl              |
| 70511  | 2140 | 28 | 43.74% | 3.6743<br>45 | 24 | 41.64% | 3.152<br>968 | Fam86             |
| 66822  | 2008 | 28 | 43.87% | 3.9158<br>86 | 21 | 42.68% | 2.940<br>206 | Fbxo25            |
| 381406 | 1888 | 28 | 43.01% | 4.1647<br>77 | 25 | 30.93% | 3.722<br>718 | 2810408<br>M09Rik |
| 228357 | 8028 | 28 | 13.93% | 0.9794<br>59 | 20 | 9.82%  | 0.700<br>398 | Lrp4              |
| 18627  | 5845 | 28 | 19.91% | 1.3452<br>69 | 29 | 22.34% | 1.394<br>876 | Per2              |
| 14456  | 2594 | 28 | 37.74% | 3.0312<br>64 | 8  | 10.79% | 0.867<br>046 | Gas6              |
| 228839 | 2792 | 28 | 31.41% | 2.8162<br>96 | 24 | 31.73% | 2.416<br>673 | Tgif2             |
| 70122  | 6129 | 28 | 17%    | 1.2829<br>33 | 41 | 25.27% | 1.880<br>686 | Mllt3             |
| 212627 | 1867 | 28 | 40.81% | 4.2116<br>22 | 26 | 40.92% | 3.915<br>175 | Prpsap2           |
| 73172  | 1990 | 28 | 40.65% | 3.9513<br>06 | 22 | 41.96% | 3.108<br>077 | Dem1              |
| 21788  | 3027 | 28 | 22.20% | 2.5976<br>54 | 38 | 36.31% | 3.529<br>338 | Tfpi              |

|                                     |      |    |        |              |    |        |              |                   |
|-------------------------------------|------|----|--------|--------------|----|--------|--------------|-------------------|
| 71968                               | 2587 | 28 | 37.57% | 3.0394<br>66 | 11 | 14.88% | 1.195<br>414 | Wdr73             |
| 18591                               | 2956 | 28 | 26.86% | 2.6600<br>47 | 32 | 31.16% | 3.043<br>46  | Pdgb              |
| 223723                              | 3770 | 28 | 31.51% | 2.0857<br>03 | 21 | 20.98% | 1.566<br>03  | Ttl12             |
| 223978                              | 2663 | 28 | 38.87% | 2.9527<br>22 | 18 | 29.70% | 1.900<br>306 | Cpped1            |
| 94092                               | 3896 | 28 | 32.57% | 2.0182<br>49 | 24 | 22.56% | 1.731<br>866 | Trim16            |
| gi 149258000 ref X<br>M_001478697.1 | 2936 | 28 | 12.33% | 2.6781<br>67 | 28 | 14.37% | 2.681<br>168 | -                 |
| 66278                               | 1036 | 28 | 57.92% | 7.5898<br>64 | 24 | 60.42% | 6.512<br>888 | 1810013<br>D10Rik |
| 319554                              | 2883 | 28 | 30.42% | 2.7274<br>02 | 28 | 26.53% | 2.730<br>458 | Idi1              |
| 17857                               | 3218 | 28 | 23.49% | 2.4434<br>74 | 37 | 28.37% | 3.232<br>495 | Mx1               |
| 69094                               | 840  | 28 | 68.10% | 9.3608<br>32 | 37 | 62.26% | 12.38<br>353 | Tmem16<br>0       |
| 26922                               | 1337 | 28 | 62.30% | 5.8811<br>51 | 26 | 55.95% | 5.467<br>189 | Mecr              |
| 56412                               | 2303 | 28 | 47.98% | 3.4142<br>85 | 26 | 45.98% | 3.173<br>961 | Noa1              |
| 21899                               | 2600 | 28 | 37.15% | 3.0242<br>69 | 18 | 29.88% | 1.946<br>352 | Thr6              |
| 69548                               | 4861 | 28 | 24.50% | 1.6175<br>89 | 16 | 15.74% | 0.925<br>372 | 2310015<br>A10Rik |
| 17350                               | 2598 | 28 | 40.45% | 3.0265<br>97 | 10 | 13.63% | 1.082<br>139 | Mlh1              |
| 14385                               | 2109 | 28 | 41.82% | 3.7283<br>54 | 18 | 34.28% | 2.399<br>485 | Slc37a4           |
| 50721                               | 1703 | 28 | 54.49% | 4.6172<br>04 | 16 | 27.60% | 2.641<br>359 | Sirt6             |
| 54201                               | 6893 | 28 | 10.20% | 1.1407<br>37 | 21 | 4.40%  | 0.856<br>511 | Zfp316            |
| 56088                               | 1017 | 28 | 63.23% | 7.7316<br>61 | 43 | 74.34% | 11.88<br>693 | Psmg1             |
| 72284                               | 1959 | 28 | 45.38% | 4.0138<br>33 | 17 | 34.71% | 2.439<br>701 | Oraov1            |
| 69163                               | 1424 | 28 | 54.71% | 5.5218<br>39 | 14 | 27.95% | 2.764<br>014 | Mrpl44            |
| 17863                               | 3420 | 28 | 27.81% | 2.2991<br>52 | 5  | 6.93%  | 0.411<br>023 | Myb               |



|                                  |      |    |        |              |    |        |              |                   |
|----------------------------------|------|----|--------|--------------|----|--------|--------------|-------------------|
| 70021                            | 1435 | 28 | 56.79% | 5.4795<br>11 | 28 | 54.77% | 5.485<br>652 | Nt5dc2            |
| gi 256355137 ref N<br>R_015498.1 | 3630 | 28 | 29.75% | 2.1661<br>43 | 13 | 15.40% | 1.006<br>836 | -                 |
| 108121                           | 907  | 28 | 16.43% | 8.6693<br>48 | 31 | 16.43% | 9.608<br>963 | U2af1             |
| 105352                           | 2243 | 28 | 22.47% | 3.5056<br>17 | 49 | 37.49% | 6.141<br>705 | Dusp22            |
| 442827                           | 4105 | 28 | 24.48% | 1.9154<br>93 | 12 | 13.50% | 0.821<br>846 | Rab44             |
| 56309                            | 1485 | 28 | 54.21% | 5.2950<br>16 | 33 | 61.62% | 6.247<br>548 | Mycbp             |
| 74257                            | 1567 | 28 | 52.20% | 5.0179<br>32 | 25 | 49.07% | 4.485<br>317 | Tspan17           |
| 97159                            | 1109 | 28 | 68.98% | 7.0902<br>61 | 29 | 67.09% | 7.351<br>713 | A430005<br>L14Rik |
| 12545                            | 2960 | 28 | 32.77% | 2.6564<br>52 | 17 | 21.59% | 1.614<br>653 | Cdc7              |
| 66379                            | 741  | 28 | 73.14% | 10.611<br>47 | 34 | 63.16% | 12.89<br>98  | 2310016<br>M24Rik |
| 232946                           | 1850 | 28 | 47.89% | 4.2503<br>24 | 26 | 40.22% | 3.951<br>152 | Bloc1s3           |
| 67914                            | 1693 | 28 | 49.03% | 4.6444<br>77 | 12 | 24.39% | 1.992<br>721 | Coq9              |
| 94254                            | 2310 | 28 | 44.72% | 3.4039<br>39 | 27 | 31.95% | 3.286<br>048 | Wbscr16           |
| 259300                           | 3058 | 28 | 30.02% | 2.5713<br>21 | 15 | 20.83% | 1.379<br>037 | Ehd2              |
| 74044                            | 4555 | 28 | 25.64% | 1.7262<br>57 | 24 | 23.49% | 1.481<br>307 | Ttf2              |
| 69902                            | 930  | 28 | 64.09% | 8.4549<br>45 | 33 | 68.06% | 9.975<br>923 | Mrto4             |
| 237940                           | 2553 | 28 | 42.85% | 3.0799<br>45 | 18 | 28.16% | 1.982<br>183 | Aoc2              |
| 19799                            | 175  | 28 | 88%    | 44.931<br>99 | 29 | 88.57% | 46.58<br>886 | Rn4.5s            |
| 72572                            | 2075 | 28 | 43.81% | 3.7894<br>45 | 19 | 39.95% | 2.574<br>291 | Spats2            |
| 70292                            | 6617 | 28 | 16.99% | 1.1883<br>18 | 16 | 10.93% | 0.679<br>8   | Afap1             |
| 384763                           | 3671 | 28 | 31.16% | 2.1419<br>5  | 32 | 33.12% | 2.450<br>686 | Zfp667            |
| 232491                           | 2155 | 28 | 39.21% | 3.6487<br>7  | 16 | 28.17% | 2.087<br>348 | Pyroxd1           |

|                                     |       |    |        |              |    |        |              |                    |
|-------------------------------------|-------|----|--------|--------------|----|--------|--------------|--------------------|
| 14677                               | 3193  | 28 | 29.63% | 2.4626<br>05 | 7  | 7.86%  | 0.616<br>341 | Gnai1              |
| 68917                               | 636   | 28 | 72.64% | 12.363<br>36 | 30 | 79.56% | 13.26<br>13  | Hint2              |
| 21749                               | 1679  | 28 | 44.13% | 4.6832<br>04 | 23 | 41.57% | 3.851<br>228 | Terf1              |
| 66049                               | 1392  | 28 | 71.12% | 5.6487<br>78 | 14 | 39.08% | 2.827<br>554 | Rogdi              |
| 52639                               | 1817  | 28 | 53.77% | 4.3275<br>17 | 28 | 52.12% | 4.332<br>367 | Wipi1              |
| gi 39930578 ref N<br>M_198246.1     | 1576  | 28 | 50.19% | 4.9892<br>76 | 25 | 51.46% | 4.459<br>703 | -                  |
| 65945                               | 3319  | 28 | 33.26% | 2.3691<br>17 | 34 | 39.35% | 2.880<br>009 | Clstn1             |
| 1E+08                               | 3863  | 28 | 2.10%  | 2.0354<br>9  | 30 | 2.30%  | 2.183<br>326 | 1700047<br>I17Rik2 |
| 100609                              | 2242  | 28 | 34.75% | 3.5071<br>81 | 23 | 33.05% | 2.884<br>127 | Nsun5              |
| 320244                              | 4858  | 28 | 24.43% | 1.6185<br>88 | 21 | 16.80% | 1.215<br>301 | Ttl15              |
| gi 118129961 ref N<br>M_138309.2    | 3317  | 28 | 33.34% | 2.3705<br>45 | 31 | 37.20% | 2.627<br>473 | -                  |
| gi 149263749 ref X<br>M_001001076.2 | 2644  | 28 | 38.88% | 2.9739<br>41 | 26 | 33.74% | 2.764<br>611 | -                  |
| 319670                              | 10136 | 28 | 11.86% | 0.7757<br>6  | 17 | 7.18%  | 0.471<br>525 | Eml5               |
| gi 145966821 ref N<br>M_007833.4    | 1766  | 28 | 47.45% | 4.4524<br>91 | 9  | 21.18% | 1.432<br>762 | -                  |
| 56535                               | 2303  | 28 | 41.68% | 3.4142<br>85 | 33 | 35.48% | 4.028<br>488 | Pex3               |
| 101565                              | 5024  | 27 | 22.67% | 1.5092<br>11 | 21 | 18.09% | 1.175<br>146 | Ccp110             |
| 15233                               | 1708  | 27 | 53.51% | 4.4392<br>7  | 19 | 38.41% | 3.127<br>432 | Hgd                |
| 640963                              | 1631  | 27 | 51.01% | 4.6488<br>5  | 12 | 26.92% | 2.068<br>471 | Gm7315             |
| 320571                              | 4474  | 27 | 17.03% | 1.6947<br>42 | 1  | 1.10%  | 0.062<br>839 | Atp8b5             |
| 27057                               | 3546  | 27 | 8.35%  | 2.1382<br>61 | 17 | 8.23%  | 1.347<br>821 | Ncoa4              |
| 1E+08                               | 3789  | 27 | 8.89%  | 2.0011<br>28 | 19 | 10.11% | 1.409<br>779 | Gm3129             |
| 268930                              | 2039  | 27 | 41.59% | 3.7186<br>24 | 36 | 53.11% | 4.963<br>721 | Pkmyt1             |

|                                  |      |    |        |              |    |        |              |                   |
|----------------------------------|------|----|--------|--------------|----|--------|--------------|-------------------|
| 50496                            | 2512 | 27 | 36.07% | 3.0184<br>21 | 20 | 34.16% | 2.238<br>373 | E2f6              |
| 13385                            | 3339 | 27 | 27.79% | 2.2708<br>22 | 24 | 29.32% | 2.020<br>77  | Dlg4              |
| 67027                            | 2241 | 27 | 45.20% | 3.3834<br>33 | 29 | 40.47% | 3.638<br>13  | Mkm2              |
| 216618                           | 1523 | 27 | 47.21% | 4.9785<br>12 | 19 | 40.25% | 3.507<br>323 | Ccdc104           |
| 68644                            | 1382 | 27 | 48.70% | 5.4864<br>5  | 33 | 58.10% | 6.713<br>176 | Abhd14a           |
| 66310                            | 799  | 27 | 64.83% | 9.4897<br>05 | 31 | 64.46% | 10.90<br>78  | Dpy30             |
| 54614                            | 3182 | 27 | 33%    | 2.3828<br>64 | 11 | 13.76% | 0.971<br>884 | Prpf40b           |
| 57138                            | 6042 | 27 | 18.72% | 1.2549<br>28 | 33 | 21.83% | 1.535<br>52  | Slc12a5           |
| 98388                            | 3135 | 27 | 30.18% | 2.4185<br>88 | 10 | 14.42% | 0.896<br>777 | Chst10            |
| 14910                            | 1230 | 27 | 54.15% | 6.1644<br>5  | 44 | 73.41% | 10.05<br>703 | Gt(ROS<br>A)26Sor |
| 11692                            | 1775 | 27 | 36.79% | 4.2717<br>04 | 31 | 47.49% | 4.910<br>045 | Gfer              |
| 69372                            | 1691 | 27 | 43.47% | 4.4838<br>99 | 23 | 40.33% | 3.823<br>898 | Mocs3             |
| 237775                           | 3412 | 27 | 34.79% | 2.2222<br>37 | 14 | 18.43% | 1.153<br>563 | Zfp867            |
| 83485                            | 1718 | 27 | 48.20% | 4.4134<br>31 | 34 | 56.05% | 5.563<br>882 | Ngrn              |
| 13078                            | 5128 | 27 | 20.94% | 1.4786<br>03 | 15 | 11.23% | 0.822<br>366 | Cyp1b1            |
| 27388                            | 2172 | 27 | 46.82% | 3.4909<br>18 | 26 | 45.53% | 3.365<br>392 | Ptdss2            |
| 27998                            | 1039 | 27 | 73.92% | 7.2976<br>65 | 17 | 56.88% | 4.599<br>975 | Exosc5            |
| gi 46249418 ref N<br>M_019919.2  | 6712 | 27 | 12.83% | 1.1296<br>59 | 39 | 14.94% | 1.633<br>559 | -                 |
| 66598                            | 1611 | 27 | 53.51% | 4.7065<br>64 | 38 | 69.27% | 6.631<br>476 | 3110001<br>I22Rik |
| 78935                            | 4699 | 27 | 23.24% | 1.6135<br>93 | 35 | 23.77% | 2.094<br>039 | Saal1             |
| gi 142350585 ref N<br>M_026365.2 | 1133 | 27 | 62.31% | 6.6922<br>1  | 38 | 60.90% | 9.429<br>221 | -                 |
| 380614                           | 6353 | 27 | 9.35%  | 1.1934<br>95 | 22 | 10.47% | 0.973<br>567 | Intu              |

|                                     |      |    |        |              |    |        |              |                   |
|-------------------------------------|------|----|--------|--------------|----|--------|--------------|-------------------|
| 22259                               | 1955 | 27 | 45.88% | 3.8784<br>01 | 13 | 23.79% | 1.869<br>471 | Nr1h3             |
| 26895                               | 2231 | 27 | 41.91% | 3.3985<br>99 | 15 | 27.30% | 1.890<br>226 | Cops7b            |
| 232334                              | 1327 | 27 | 59.16% | 5.7138<br>46 | 18 | 42.20% | 3.813<br>5   | Vgl14             |
| 68558                               | 1774 | 27 | 45.72% | 4.2741<br>12 | 25 | 43.35% | 3.961<br>946 | Ankra2            |
| 74270                               | 4157 | 27 | 24.54% | 1.8239<br>77 | 13 | 14.27% | 0.879<br>195 | Usp20             |
| 245841                              | 787  | 27 | 55.40% | 9.6344<br>02 | 33 | 76.24% | 11.78<br>858 | Polr2h            |
| 207592                              | 6988 | 27 | 15.58% | 1.0850<br>42 | 33 | 17.39% | 1.327<br>649 | Tbc1d16           |
| 380836                              | 2035 | 27 | 47.17% | 3.7259<br>33 | 20 | 32.78% | 2.763<br>043 | Mrs2              |
| 71562                               | 2332 | 27 | 43.74% | 3.2514<br>04 | 28 | 40.31% | 3.375<br>605 | Afmid             |
| gi 149259288 ref X<br>M_001478110.1 | 5096 | 27 | 11.99% | 1.4878<br>87 | 11 | 6.93%  | 0.606<br>856 | -                 |
| gi 58037140 ref N<br>M_026937.1     | 1524 | 27 | 59.32% | 4.9752<br>45 | 53 | 73.03% | 9.777<br>167 | -                 |
| 239827                              | 2184 | 27 | 44.23% | 3.4717<br>37 | 15 | 29.26% | 1.930<br>904 | Pigz              |
| 170706                              | 1017 | 27 | 49.95% | 7.4555<br>3  | 35 | 65.98% | 9.675<br>406 | Tmem37            |
| 666532                              | 2812 | 27 | 15.75% | 2.6963<br>99 | 29 | 16.04% | 2.899<br>378 | Gm1313<br>9       |
| 68028                               | 477  | 27 | 31.45% | 15.895<br>75 | 40 | 35.22% | 23.57<br>565 | Rpl2211           |
| 319278                              | 1683 | 27 | 45.51% | 4.5052<br>13 | 23 | 37.91% | 3.842<br>075 | A230050<br>P20Rik |
| 74097                               | 792  | 27 | 79.67% | 9.5735<br>78 | 37 | 80.56% | 13.13<br>405 | Pop7              |
| 56220                               | 2068 | 27 | 22.10% | 3.6664<br>77 | 21 | 27.56% | 2.854<br>9   | Zfp386            |
| 12896                               | 2366 | 27 | 36.01% | 3.2046<br>8  | 15 | 28.49% | 1.782<br>373 | Cpt2              |
| 67769                               | 4565 | 27 | 25.26% | 1.6609<br>58 | 20 | 16.34% | 1.231<br>718 | Gpatch2           |
| 73681                               | 2359 | 27 | 40.27% | 3.2141<br>9  | 18 | 24.71% | 2.145<br>195 | Trmt11            |
| 233824                              | 2884 | 27 | 34.95% | 2.6290<br>83 | 42 | 44.90% | 4.094<br>267 | Cog7              |

|        |      |    |        |              |    |        |              |                   |
|--------|------|----|--------|--------------|----|--------|--------------|-------------------|
| 59005  | 634  | 27 | 76.66% | 11.959<br>42 | 40 | 80.60% | 17.73<br>752 | Trappe21          |
| 109093 | 1880 | 27 | 49.84% | 4.0331<br>24 | 31 | 51.86% | 4.635<br>814 | Rars2             |
| 226043 | 2011 | 27 | 39.78% | 3.7704       | 26 | 43.21% | 3.634<br>824 | Cbwd1             |
| 72154  | 5304 | 27 | 19.12% | 1.4295<br>39 | 17 | 11.71% | 0.901<br>089 | Zfp157            |
| 72151  | 1750 | 27 | 50.80% | 4.3327<br>28 | 29 | 50.97% | 4.658<br>886 | Rfc5              |
| 72345  | 8476 | 27 | 13.01% | 0.8945<br>58 | 19 | 9.95%  | 0.630<br>209 | Fam123b           |
| 69666  | 564  | 27 | 75.89% | 13.443<br>75 | 29 | 73.05% | 14.45<br>576 | Psmg4             |
| 19053  | 1836 | 27 | 19.23% | 4.1297<br>79 | 30 | 26.20% | 4.593<br>785 | Ppp2cb            |
| 408022 | 3813 | 27 | 23.18% | 1.9885<br>32 | 14 | 15.37% | 1.032<br>246 | Ccdc111           |
| 216853 | 1896 | 27 | 48.89% | 3.9990<br>9  | 15 | 24.10% | 2.224<br>206 | Wrap53            |
| 66423  | 802  | 27 | 73.69% | 9.4542<br>07 | 26 | 66.71% | 9.114<br>253 | 2410022<br>L05Rik |
| 67181  | 1615 | 27 | 14.30% | 4.6949<br>06 | 10 | 11.08% | 1.740<br>803 | Ctdnep1           |
| 194268 | 2942 | 27 | 37.36% | 2.5772<br>52 | 21 | 29.54% | 2.006<br>775 | 9930104<br>L06Rik |
| 69596  | 1568 | 27 | 54.66% | 4.8356<br>34 | 18 | 42.09% | 3.227<br>369 | 2310035<br>K24Rik |
| 12015  | 1452 | 27 | 50.28% | 5.2219<br>52 | 28 | 47.31% | 5.421<br>426 | Bad               |
| 192289 | 2264 | 27 | 30.74% | 3.3490<br>61 | 24 | 37.19% | 2.980<br>279 | Tmlhe             |
| 100090 | 2226 | 27 | 45.91% | 3.4062<br>33 | 31 | 40.25% | 3.915<br>242 | Zbtb48            |
| 85031  | 1994 | 27 | 38.31% | 3.8025<br>45 | 10 | 19.21% | 1.409<br>928 | Pla1a             |
| 21379  | 3165 | 27 | 17.06% | 2.3956<br>63 | 8  | 9.45%  | 0.710<br>622 | Tbrg4             |
| 675812 | 3158 | 27 | 33.91% | 2.4009<br>73 | 18 | 19.03% | 1.602<br>443 | Zfp605            |
| 67669  | 1045 | 27 | 60.10% | 7.2557<br>65 | 22 | 63.92% | 5.918<br>73  | l7Rn6             |
| 237781 | 2522 | 27 | 37.59% | 3.0064<br>53 | 16 | 25.69% | 1.783<br>598 | Smcr7             |

|                              |      |    |        |              |    |        |              |                   |
|------------------------------|------|----|--------|--------------|----|--------|--------------|-------------------|
| 109929                       | 1681 | 27 | 45.93% | 4.5105<br>73 | 20 | 41.46% | 3.344<br>91  | Zbtb25            |
| 107986                       | 1929 | 27 | 35.46% | 3.9306<br>76 | 17 | 28.93% | 2.477<br>643 | Ddb2              |
| 70808                        | 4136 | 27 | 22.24% | 1.8332<br>38 | 19 | 14.68% | 1.291<br>502 | 4632415<br>L05Rik |
| 58234                        | 7131 | 27 | 16.17% | 1.0632<br>83 | 53 | 28.59% | 2.089<br>525 | Shank3            |
| 110948                       | 4833 | 27 | 23.13% | 1.5688<br>55 | 25 | 18.79% | 1.454<br>271 | Hlcs              |
| 66595                        | 2755 | 27 | 36.15% | 2.7521<br>87 | 22 | 27.04% | 2.245<br>035 | Aste1             |
| 12583                        | 1530 | 27 | 45.95% | 4.9557<br>35 | 24 | 49.02% | 4.410<br>034 | Cdo1              |
| 67939                        | 2128 | 27 | 35.48% | 3.5630<br>99 | 23 | 32.47% | 3.038<br>634 | Prorsd1           |
| 12369                        | 2350 | 27 | 38.89% | 3.2265       | 24 | 35.62% | 2.871<br>214 | Casp7             |
| 235633                       | 5186 | 27 | 20.75% | 1.4620<br>66 | 12 | 10.39% | 0.650<br>535 | Als2cl            |
| gi 118130669 ref NM_019574.2 | 2534 | 27 | 41%    | 2.9922<br>15 | 19 | 24.27% | 2.107<br>993 | -                 |
| 63873                        | 3247 | 26 | 30.27% | 2.2486<br>75 | 24 | 29.84% | 2.078<br>026 | Trpv4             |
| 229877                       | 3663 | 26 | 8.33%  | 1.9932<br>98 | 20 | 6.66%  | 1.535<br>024 | Rap1gds<br>1      |
| 71706                        | 2421 | 26 | 43.21% | 3.0158<br>81 | 10 | 18.01% | 1.161<br>254 | Slc46a3           |
| 12393                        | 6463 | 26 | 16.25% | 1.1297<br>31 | 18 | 11.82% | 0.782<br>998 | Runx2             |
| 236930                       | 4198 | 26 | 25.92% | 1.7392<br>68 | 15 | 15.72% | 1.004<br>549 | Ercc6l            |
| 210992                       | 1605 | 26 | 52.34% | 4.5491<br>89 | 8  | 19.75% | 1.401<br>319 | Lpcat1            |
| 79202                        | 2275 | 26 | 31.91% | 3.2094<br>28 | 16 | 28.84% | 1.977<br>246 | Tnfrsf22          |
| 665563                       | 2256 | 26 | 38.74% | 3.2364<br>58 | 16 | 26.51% | 1.993<br>898 | Mthfd2l           |
| 66292                        | 423  | 26 | 52.25% | 17.261<br>11 | 30 | 55.32% | 19.93<br>898 | Mrps2l            |
| 75593                        | 785  | 26 | 72.23% | 9.3012<br>09 | 16 | 63.57% | 5.730<br>235 | 2410003<br>K15Rik |
| 30057                        | 527  | 26 | 74%    | 13.854<br>74 | 28 | 58.06% | 14.93<br>721 | Timm8b            |

|                                     |      |    |        |              |    |        |              |                   |
|-------------------------------------|------|----|--------|--------------|----|--------|--------------|-------------------|
| 67286                               | 911  | 26 | 73%    | 8.0147<br>63 | 23 | 57.30% | 7.097<br>928 | Rab15             |
| 66132                               | 3117 | 26 | 32.21% | 2.3424<br>6  | 25 | 27.75% | 2.254<br>89  | 1110008<br>L16Rik |
| gi 149263172 ref X<br>M_001479478.1 | 4073 | 26 | 21.46% | 1.7926<br>46 | 31 | 27.84% | 2.139<br>781 | -                 |
| 12504                               | 3095 | 26 | 29.95% | 2.3591<br>11 | 6  | 9.50%  | 0.545<br>02  | Cd4               |
| 19739                               | 7642 | 26 | 12.04% | 0.9554<br>37 | 31 | 14.88% | 1.140<br>451 | Rgs9              |
| 69099                               | 1663 | 26 | 33.97% | 4.3905<br>29 | 27 | 32.29% | 4.564<br>504 | 1810009<br>N02Rik |
| 15016                               | 1733 | 26 | 13.79% | 4.2131<br>85 | 34 | 14.37% | 5.515<br>723 | H2-Q5             |
| 72774                               | 1170 | 26 | 63.33% | 6.2405<br>55 | 17 | 53.76% | 4.084<br>935 | Neil1             |
| 108907                              | 2960 | 26 | 36.08% | 2.4667<br>06 | 24 | 33.01% | 2.279<br>511 | Nusap1            |
| 66667                               | 4606 | 26 | 22.77% | 1.5852<br>04 | 34 | 28.92% | 2.075<br>282 | Hspbap1           |
| 109115                              | 1483 | 26 | 48.35% | 4.9234<br>32 | 31 | 57.72% | 5.876<br>824 | Supt3h            |
| 66506                               | 839  | 26 | 75.80% | 8.7025<br>61 | 8  | 35.76% | 2.680<br>712 | Psmg3             |
| 216516                              | 5153 | 26 | 20.80% | 1.4169<br>32 | 10 | 8.83%  | 0.545<br>584 | Ccdc157           |
| 75686                               | 1606 | 26 | 45.14% | 4.5463<br>57 | 14 | 34.93% | 2.450<br>782 | Nudt16            |
| 18861                               | 3273 | 26 | 30.71% | 2.2308<br>12 | 11 | 13.72% | 0.944<br>863 | Pms2              |
| 80707                               | 2251 | 26 | 35.67% | 3.2436<br>47 | 32 | 46.29% | 3.996<br>654 | Wwox              |
| 66208                               | 658  | 26 | 57.29% | 11.096<br>43 | 31 | 48.48% | 13.24<br>518 | Nenf              |
| 103012                              | 5769 | 26 | 16.73% | 1.2656<br>35 | 20 | 13.19% | 0.974<br>656 | 6720401<br>G13Rik |
| 13110                               | 3595 | 26 | 28.57% | 2.0310<br>01 | 20 | 18.78% | 1.564<br>059 | Cyp2j6            |
| 229595                              | 3856 | 26 | 24.33% | 1.8935<br>29 | 37 | 34.23% | 2.697<br>658 | Adamts1<br>4      |
| 67877                               | 1197 | 26 | 37.68% | 6.0997<br>9  | 21 | 27.07% | 4.932<br>275 | Naa20             |
| 24030                               | 684  | 26 | 73.83% | 10.674<br>63 | 21 | 58.63% | 8.631<br>481 | Mrps12            |

|                                     |      |    |        |              |    |        |              |                   |
|-------------------------------------|------|----|--------|--------------|----|--------|--------------|-------------------|
| 240064                              | 4244 | 26 | 18.71% | 1.7204<br>17 | 11 | 11.59% | 0.728<br>684 | Zfp799            |
| 15460                               | 5599 | 26 | 18.06% | 1.3040<br>63 | 10 | 8.41%  | 0.502<br>125 | Hr                |
| 195434                              | 3702 | 26 | 27.74% | 1.9722<br>98 | 26 | 26.72% | 1.974<br>509 | Utp14b            |
| 66537                               | 734  | 26 | 34.60% | 9.9474<br>78 | 43 | 41.01% | 16.47<br>003 | Pomp              |
| 224630                              | 1100 | 26 | 53.55% | 6.6376<br>81 | 15 | 51.18% | 3.833<br>723 | Bnip1             |
| 12580                               | 1119 | 26 | 54.42% | 6.5249<br>77 | 18 | 43.97% | 4.522<br>354 | Cdkn2c            |
| 12501                               | 1436 | 26 | 58.98% | 5.0845<br>75 | 2  | 6.82%  | 0.391<br>559 | Cd3e              |
| 17169                               | 3388 | 26 | 7.91%  | 2.1550<br>91 | 18 | 7.91%  | 1.493<br>658 | Mark3             |
| 407786                              | 2602 | 26 | 35.63% | 2.8060<br>91 | 14 | 20.06% | 1.512<br>665 | Taf9b             |
| 104346                              | 1687 | 26 | 50.62% | 4.3280<br>67 | 21 | 35.45% | 3.499<br>664 | Gas8              |
| gi 149250319 ref X<br>R_031205.1    | 1054 | 26 | 12.81% | 6.9273<br>71 | 41 | 16.98% | 10.93<br>617 | -                 |
| 66648                               | 4040 | 26 | 21.73% | 1.8072<br>89 | 36 | 25.97% | 2.505<br>205 | 5730494<br>M16Rik |
| 13661                               | 4387 | 26 | 26.21% | 1.6643<br>38 | 30 | 28.79% | 1.922<br>542 | Ehf               |
| 18972                               | 1634 | 26 | 54.35% | 4.4684<br>51 | 30 | 60.77% | 5.161<br>683 | Pold2             |
| 67713                               | 775  | 26 | 54.84% | 9.4212<br>25 | 40 | 62.06% | 14.51<br>043 | Dnajc19           |
| 16173                               | 866  | 26 | 68.82% | 8.4312<br>34 | 34 | 81.64% | 11.03<br>782 | Il18              |
| 66523                               | 1382 | 26 | 54.49% | 5.2832<br>48 | 21 | 50.80% | 4.272<br>021 | 2810004<br>N23Rik |
| 66274                               | 5053 | 26 | 14.01% | 1.4449<br>73 | 11 | 6.55%  | 0.612<br>02  | 1810012<br>P15Rik |
| 330050                              | 3082 | 26 | 34.20% | 2.3690<br>62 | 25 | 26.90% | 2.280<br>497 | Fam185a           |
| 69809                               | 1318 | 26 | 54.86% | 5.5397<br>94 | 11 | 32.93% | 2.346<br>386 | 1810046<br>K07Rik |
| gi 149251775 ref X<br>M_001476529.1 | 1324 | 26 | 8.31%  | 5.5146<br>9  | 25 | 8.31%  | 5.308<br>528 | -                 |
| 77106                               | 1869 | 26 | 33.01% | 3.9066<br>07 | 20 | 36.38% | 3.008<br>45  | Tmem18<br>1a      |



|                                  |      |    |        |              |    |        |              |                   |
|----------------------------------|------|----|--------|--------------|----|--------|--------------|-------------------|
| 217038                           | 2490 | 26 | 37.75% | 2.9323<br>09 | 13 | 18.51% | 1.467<br>797 | Mrm1              |
| 76773                            | 1354 | 26 | 53.03% | 5.3925<br>03 | 18 | 29.99% | 3.737<br>455 | Wdyhv1            |
| 67549                            | 1765 | 26 | 52.24% | 4.1367<br>98 | 14 | 31.84% | 2.230<br>003 | Gpr89             |
| 613262                           | 1403 | 26 | 44.05% | 5.2041<br>69 | 30 | 42.62% | 6.011<br>539 | BC0297<br>22      |
| 66462                            | 657  | 26 | 79.76% | 11.113<br>32 | 30 | 82.50% | 12.83<br>743 | 2810428<br>I15Rik |
| 54613                            | 1593 | 26 | 36.35% | 4.5834<br>58 | 13 | 29.63% | 2.294<br>297 | St3gal6           |
| 70186                            | 635  | 26 | 77.01% | 11.498<br>34 | 39 | 86.14% | 17.26<br>685 | Fam162a           |
| 77622                            | 1903 | 26 | 43.83% | 3.8368<br>1  | 13 | 28.32% | 1.920<br>555 | Apex2             |
| 14375                            | 2113 | 26 | 41.93% | 3.4554<br>89 | 22 | 42.12% | 2.927<br>152 | Xrcc6             |
| 70024                            | 3510 | 26 | 28.49% | 2.0801<br>85 | 29 | 31.11% | 2.322<br>806 | Mcm10             |
| 73694                            | 2303 | 26 | 34.43% | 3.1704<br>08 | 42 | 57.84% | 5.127<br>167 | 2410091<br>C18Rik |
| 233887                           | 2659 | 26 | 38.51% | 2.7459<br>38 | 19 | 26.18% | 2.008<br>896 | Zfp553            |
| gi 163965416 ref N<br>R_004843.1 | 4296 | 26 | 6.05%  | 1.6995<br>92 | 21 | 5.28%  | 1.374<br>286 | -                 |
| 170731                           | 4377 | 26 | 12.34% | 1.6681<br>4  | 18 | 6.63%  | 1.156<br>16  | Mfn2              |
| 54132                            | 1524 | 26 | 8.73%  | 4.7909<br>77 | 32 | 9.25%  | 5.903<br>195 | Pdlim1            |
| 209773                           | 4435 | 26 | 25.32% | 1.6463<br>24 | 6  | 5.64%  | 0.380<br>347 | Dennd2a           |
| 70166                            | 1502 | 26 | 55.06% | 4.8611<br>51 | 28 | 58.52% | 5.240<br>952 | Lipn              |
| 236727                           | 2469 | 26 | 39.45% | 2.9572<br>5  | 6  | 10.17% | 0.683<br>207 | Slc9a7            |
| 232539                           | 6571 | 26 | 17.68% | 1.1111<br>63 | 10 | 7.46%  | 0.427<br>849 | Klhdc5            |
| 319293                           | 2773 | 26 | 32.10% | 2.6330<br>5  | 1  | 1.77%  | 0.101<br>385 | A530099<br>J19Rik |
| 68490                            | 2179 | 26 | 41.62% | 3.3508<br>26 | 9  | 19.05% | 1.161<br>201 | Zfp579            |
| 15278                            | 2448 | 26 | 16.01% | 2.9826<br>18 | 22 | 16.34% | 2.526<br>582 | Tfb2m             |

|                                  |      |    |        |              |    |        |              |                   |
|----------------------------------|------|----|--------|--------------|----|--------|--------------|-------------------|
| 72931                            | 784  | 26 | 26.53% | 9.3130<br>73 | 46 | 25.89% | 16.49<br>544 | Swi5              |
| 233877                           | 1654 | 26 | 42.32% | 4.4144<br>19 | 20 | 41.41% | 3.399<br>512 | Kctd13            |
| 52535                            | 1637 | 26 | 50.58% | 4.4602<br>62 | 18 | 40.50% | 3.091<br>334 | Mettl17           |
| 72691                            | 2049 | 25 | 40.07% | 3.4263<br>66 | 5  | 10.40% | 0.686<br>041 | Calhm2            |
| 18194                            | 2218 | 25 | 36.25% | 3.1652<br>95 | 17 | 29.67% | 2.154<br>813 | Nsdhl             |
| 68074                            | 2439 | 25 | 40.75% | 2.8784<br>85 | 21 | 34.73% | 2.420<br>637 | A930013<br>F10Rik |
| 68020                            | 1061 | 25 | 44.77% | 6.6169<br>88 | 25 | 58.25% | 6.624<br>403 | 2810002<br>N01Rik |
| 1E+08                            | 2138 | 25 | 16.88% | 3.2837<br>34 | 34 | 19.27% | 4.470<br>883 | Gm3718            |
| 68736                            | 1448 | 25 | 47.38% | 4.8484<br>97 | 16 | 37.22% | 3.106<br>516 | Tyw5              |
| 22590                            | 972  | 25 | 62.55% | 7.2228<br>64 | 28 | 55.86% | 8.098<br>673 | Xpa               |
| 219072                           | 1588 | 25 | 54.09% | 4.4210<br>48 | 20 | 40.55% | 3.540<br>802 | Haus4             |
| 64657                            | 1125 | 25 | 63.02% | 6.2405<br>55 | 31 | 64.62% | 7.746<br>96  | Mrps10            |
| 319370                           | 1498 | 25 | 20.29% | 4.6866<br>65 | 32 | 22.63% | 6.005<br>654 | Fam100b           |
| 381259                           | 1884 | 25 | 43.79% | 3.7264<br>46 | 19 | 39.60% | 2.835<br>273 | Tmem23<br>7       |
| 231830                           | 3346 | 25 | 28.42% | 2.0982<br>14 | 37 | 43.60% | 3.108<br>837 | Micall2           |
| gi 146149225 ref N<br>M_080562.4 | 3684 | 25 | 25.87% | 1.9057<br>07 | 18 | 21.06% | 1.373<br>647 | -                 |
| 74760                            | 2320 | 25 | 36.21% | 3.0261<br>31 | 20 | 34.35% | 2.423<br>618 | Rab3il1           |
| 12417                            | 1851 | 25 | 18.48% | 3.7928<br>82 | 18 | 19.34% | 2.733<br>935 | Cbx3              |
| 11541                            | 1844 | 25 | 18.49% | 3.8072<br>8  | 14 | 20.50% | 2.134<br>466 | Adora2b           |
| 269033                           | 2291 | 25 | 37.23% | 3.0644<br>37 | 17 | 25.36% | 2.086<br>152 | 4930503<br>L19Rik |
| 67623                            | 3312 | 25 | 21.98% | 2.1197<br>54 | 29 | 20.83% | 2.461<br>67  | Tm7sf3            |
| 65116                            | 1312 | 25 | 49.47% | 5.3510<br>85 | 23 | 49.31% | 4.928<br>515 | Prrg2             |

|                                 |      |    |        |              |    |        |              |             |
|---------------------------------|------|----|--------|--------------|----|--------|--------------|-------------|
| 226418                          | 3843 | 25 | 25.94% | 1.8268<br>6  | 15 | 16.89% | 1.097<br>345 | Yod1        |
| 11856                           | 5510 | 25 | 16.01% | 1.2741<br>6  | 37 | 24.32% | 1.887<br>871 | Arhgap6     |
| 66958                           | 1968 | 25 | 21.90% | 3.5673<br>9  | 13 | 19.97% | 1.857<br>122 | Tmx2        |
| 74411                           | 2906 | 25 | 27.56% | 2.4159<br>06 | 9  | 13.49% | 0.870<br>701 | Ppapdc2     |
| 54342                           | 2536 | 25 | 18.26% | 2.7683<br>85 | 22 | 23.42% | 2.438<br>909 | Gnpnat1     |
| gi 149253472 ref XM_001477161.1 | 1239 | 25 | 55.77% | 5.6663<br>63 | 33 | 51.09% | 7.487<br>981 | -           |
| 69726                           | 3769 | 25 | 19.26% | 1.8627<br>29 | 16 | 18.12% | 1.193<br>482 | Smyd3       |
| 69151                           | 1778 | 25 | 41%    | 3.9486<br>07 | 24 | 38.30% | 3.794<br>911 | Lzic        |
| 78928                           | 2574 | 25 | 14.18% | 2.7275<br>15 | 21 | 16.74% | 2.293<br>68  | Pigt        |
| gi 168229267 ref NR_015349.1    | 3137 | 25 | 29.17% | 2.2380<br>06 | 26 | 29.07% | 2.330<br>134 | -           |
| 223669                          | 2785 | 25 | 35.40% | 2.5208<br>7  | 17 | 23.30% | 1.716<br>113 | Zfp7        |
| 623257                          | 2206 | 25 | 43.06% | 3.1825<br>13 | 11 | 22.71% | 1.401<br>875 | Gm1140<br>0 |
| 72175                           | 3051 | 25 | 29.30% | 2.3010<br>9  | 21 | 24.91% | 1.935<br>081 | Mfsd8       |
| 12526                           | 1416 | 25 | 48.02% | 4.9580<br>68 | 2  | 6.50%  | 0.397<br>09  | Cd8b1       |
| 232560                          | 3566 | 25 | 27.76% | 1.9687<br>67 | 16 | 18%    | 1.261<br>423 | Caprin2     |
| 320495                          | 5561 | 25 | 15.48% | 1.2624<br>75 | 17 | 14.24% | 0.859<br>445 | Ipcf1       |
| 67676                           | 500  | 25 | 87.20% | 14.041<br>25 | 17 | 71.20% | 9.558<br>748 | Rpp21       |
| 52570                           | 1419 | 25 | 45.95% | 4.9475<br>86 | 9  | 22.69% | 1.783<br>127 | Ccdc69      |
| 22377                           | 1338 | 25 | 50.15% | 5.2471<br>03 | 24 | 60.31% | 5.042<br>864 | Wbp1        |
| 77721                           | 1448 | 25 | 49.10% | 4.8484<br>97 | 23 | 44.20% | 4.465<br>616 | Mrps5       |
| 69583                           | 1679 | 25 | 15.66% | 4.1814<br>32 | 28 | 20.61% | 4.688<br>452 | Tnfsf13     |
| 59053                           | 1967 | 25 | 47.94% | 3.5692<br>04 | 17 | 32.79% | 2.429<br>778 | Fam203a     |

|                                     |      |    |        |              |    |        |              |              |
|-------------------------------------|------|----|--------|--------------|----|--------|--------------|--------------|
| gi 118131199 ref N<br>M_016915.3    | 2903 | 25 | 30.14% | 2.4184<br>03 | 25 | 30.69% | 2.421<br>113 | -            |
| 73827                               | 2366 | 25 | 31.53% | 2.9672<br>97 | 26 | 34.87% | 3.089<br>447 | Tmem19<br>8b |
| 67042                               | 1050 | 25 | 59.62% | 6.6863<br>09 | 28 | 62.76% | 7.497<br>058 | Ift27        |
| 17965                               | 1762 | 25 | 40.35% | 3.9844<br>63 | 18 | 35.70% | 2.872<br>028 | Nb11         |
| 231086                              | 1963 | 25 | 17.78% | 3.5764<br>77 | 19 | 16.05% | 2.721<br>168 | Hadhb        |
| 1E+08                               | 783  | 25 | 37.42% | 8.9663<br>14 | 25 | 42.66% | 8.976<br>362 | Gm2382       |
| 230316                              | 3062 | 25 | 30.89% | 2.2928<br>23 | 16 | 23.25% | 1.469<br>051 | Megf9        |
| 19125                               | 2283 | 25 | 34.03% | 3.0751<br>75 | 21 | 40.34% | 2.586<br>042 | Prodh        |
| 66970                               | 6656 | 25 | 14.33% | 1.0547<br>81 | 19 | 10.71% | 0.802<br>532 | Ssbp2        |
| 66131                               | 1211 | 25 | 54.91% | 5.7973<br>77 | 18 | 51.53% | 4.178<br>789 | Tipin        |
| 14149                               | 1866 | 25 | 42.66% | 3.7623<br>92 | 17 | 37.73% | 2.561<br>294 | Fdxr         |
| 75146                               | 2280 | 25 | 38.60% | 3.0792<br>21 | 31 | 44.96% | 3.822<br>513 | Tmem18<br>0  |
| 68936                               | 517  | 25 | 65.18% | 13.579<br>54 | 35 | 87.62% | 19.03<br>267 | Fam165b      |
| 98766                               | 3450 | 25 | 27.16% | 2.0349<br>63 | 25 | 22.49% | 2.037<br>244 | Ubac1        |
| 12525                               | 3130 | 25 | 27.03% | 2.2430<br>11 | 1  | 1.57%  | 0.089<br>821 | Cd8a         |
| gi 133892597 ref N<br>M_010363.3    | 1656 | 25 | 47.71% | 4.2395<br>07 | 20 | 46.62% | 3.395<br>407 | -            |
| gi 6755521 ref NM<br>_012029.1      | 1695 | 25 | 54.34% | 4.1419<br>61 | 15 | 32.45% | 2.487<br>962 | -            |
| 216152                              | 3148 | 25 | 23.89% | 2.2301<br>86 | 33 | 27.51% | 2.947<br>144 | BC0057<br>64 |
| gi 142388432 ref N<br>M_008748.2    | 2452 | 25 | 32.38% | 2.8632<br>24 | 31 | 42.41% | 3.554<br>376 | -            |
| 19415                               | 3225 | 25 | 30.82% | 2.1769<br>38 | 9  | 12.37% | 0.784<br>576 | Ras11        |
| 27371                               | 4758 | 25 | 20.77% | 1.4755<br>41 | 14 | 11.79% | 0.827<br>229 | Sh2d2a       |
| gi 149264378 ref X<br>M_001478943.1 | 555  | 25 | 8.83%  | 12.649<br>77 | 20 | 8.83%  | 10.13<br>116 | -            |

|        |      |    |        |              |    |        |              |                   |
|--------|------|----|--------|--------------|----|--------|--------------|-------------------|
| 17472  | 4475 | 25 | 21.83% | 1.5688<br>55 | 7  | 6.64%  | 0.439<br>772 | Gbp4              |
| 78412  | 3725 | 25 | 18.31% | 1.8847<br>31 | 27 | 16.89% | 2.037<br>791 | 3110062<br>M04Rik |
| 110460 | 2076 | 25 | 32.95% | 3.3818<br>04 | 37 | 45.95% | 5.010<br>678 | Acat2             |
| 320148 | 3462 | 25 | 27.76% | 2.0279<br>1  | 32 | 35.24% | 2.598<br>633 | B430306<br>N03Rik |
| 224171 | 3974 | 25 | 26.42% | 1.7666<br>39 | 17 | 16.66% | 1.202<br>661 | C330027<br>C09Rik |
| 71743  | 2386 | 25 | 40.61% | 2.9424<br>24 | 13 | 25.48% | 1.531<br>775 | Coasy             |
| 382207 | 2472 | 25 | 36.93% | 2.8400<br>58 | 12 | 18.53% | 1.364<br>756 | Phf16             |
| 80718  | 6977 | 25 | 12.64% | 1.0062<br>53 | 7  | 4.92%  | 0.282<br>066 | Rab27b            |
| 74239  | 4359 | 25 | 23.90% | 1.6106<br>04 | 10 | 11.24% | 0.644<br>964 | Iqce              |
| 231855 | 3817 | 25 | 13.75% | 1.8393<br>04 | 18 | 14.93% | 1.325<br>783 | C330006<br>K01Rik |
| 218544 | 2719 | 25 | 29.20% | 2.5820<br>61 | 13 | 17.25% | 1.344<br>176 | Sgtb              |
| 75778  | 1730 | 25 | 50.69% | 4.0581<br>64 | 17 | 41.45% | 2.762<br>644 | Them4             |
| 170676 | 6677 | 25 | 17.01% | 1.0514<br>64 | 26 | 15.37% | 1.094<br>748 | Peg10             |
| 30949  | 1369 | 25 | 51.64% | 5.1282<br>86 | 25 | 51.64% | 5.134<br>033 | Lcmt1             |
| 69934  | 2023 | 25 | 48.39% | 3.4704<br>02 | 17 | 33.76% | 2.362<br>518 | Trmt10b           |
| 105278 | 1854 | 24 | 40.29% | 3.6352<br>75 | 14 | 30.31% | 2.122<br>953 | Cdk20             |
| 78611  | 2579 | 24 | 27.26% | 2.6133<br>38 | 16 | 22.88% | 1.744<br>178 | Btbd19            |
| 67768  | 1791 | 24 | 45.17% | 3.7631<br>49 | 21 | 40.42% | 3.296<br>445 | N6amt1            |
| 13170  | 1678 | 24 | 38.32% | 4.0165<br>67 | 40 | 47.79% | 6.701<br>78  | Dbp               |
| 12144  | 4869 | 24 | 20.05% | 1.3842<br>27 | 17 | 14.79% | 0.981<br>593 | Blm               |
| 68053  | 4735 | 24 | 19.75% | 1.4234       | 15 | 14.49% | 0.890<br>622 | Ubxn2b            |
| 53902  | 5062 | 24 | 18.67% | 1.3314<br>5  | 18 | 14.09% | 0.999<br>706 | Rcan3             |

|                                  |      |    |        |              |    |        |              |                   |
|----------------------------------|------|----|--------|--------------|----|--------|--------------|-------------------|
| 15064                            | 2509 | 24 | 35.59% | 2.6862<br>49 | 20 | 30.05% | 2.241<br>05  | Mr1               |
| 22337                            | 4354 | 24 | 23.75% | 1.5479<br>56 | 17 | 15.14% | 1.097<br>697 | Vdr               |
| 26370                            | 1186 | 24 | 60.88% | 5.6827<br>99 | 41 | 76.56% | 9.718<br>993 | Cetn2             |
| 226539                           | 3581 | 24 | 25.10% | 1.8821       | 16 | 15.75% | 1.256<br>139 | Dars2             |
| 15331                            | 1254 | 24 | 23.44% | 5.3746<br>4  | 29 | 25.44% | 6.501<br>635 | Hmgn2             |
| 227638                           | 2449 | 24 | 38.67% | 2.7520<br>62 | 19 | 25.89% | 2.181<br>157 | Qsox2             |
| 69556                            | 1408 | 24 | 45.38% | 4.7867<br>89 | 34 | 57.46% | 6.788<br>884 | Bod1              |
| 78923                            | 3882 | 24 | 24.78% | 1.7361<br>67 | 39 | 35.88% | 2.824<br>432 | Chsy3             |
| 209239                           | 2652 | 24 | 33.11% | 2.5414<br>02 | 7  | 9.99%  | 0.742<br>073 | Gan               |
| 68612                            | 931  | 24 | 71.21% | 7.2393<br>12 | 36 | 73.36% | 10.87<br>114 | Ube2c             |
| 29819                            | 2890 | 24 | 28.82% | 2.3321<br>1  | 16 | 21.87% | 1.556<br>483 | Stau2             |
| 319996                           | 4116 | 24 | 20.60% | 1.6374<br>63 | 27 | 15.62% | 1.844<br>211 | Casc4             |
| 319371                           | 2820 | 24 | 35.60% | 2.39         | 13 | 18.79% | 1.296<br>034 | D030028<br>A08Rik |
| 212391                           | 4663 | 24 | 18.40% | 1.4453<br>78 | 14 | 12.52% | 0.844<br>082 | Lcor              |
| 73828                            | 2097 | 24 | 37.63% | 3.2140<br>2  | 8  | 16.40% | 1.072<br>54  | Dcaf4             |
| 72749                            | 4239 | 24 | 23.92% | 1.5899<br>5  | 8  | 8.70%  | 0.530<br>577 | Tonsl             |
| 432467                           | 2170 | 24 | 26.36% | 3.1058<br>98 | 15 | 21.71% | 1.943<br>362 | Hnmp3             |
| 214917                           | 817  | 24 | 82.25% | 8.2494<br>48 | 29 | 67.20% | 9.979<br>254 | Fam173a           |
| 78653                            | 530  | 24 | 69.43% | 12.716<br>6  | 39 | 79.25% | 20.68<br>764 | Bola3             |
| gi 228008414 ref N<br>M_023637.2 | 1882 | 24 | 39.32% | 3.5811<br>9  | 20 | 37.09% | 2.987<br>669 | -                 |
| 67454                            | 3251 | 24 | 18.49% | 2.0731<br>46 | 21 | 18.52% | 1.816<br>036 | Ikbip             |
| 70359                            | 2800 | 24 | 32.50% | 2.4070<br>71 | 13 | 20.86% | 1.305<br>291 | Gtpbp3            |

|                                     |      |    |        |              |    |        |              |                   |
|-------------------------------------|------|----|--------|--------------|----|--------|--------------|-------------------|
| 14148                               | 861  | 24 | 59.23% | 7.8278<br>74 | 17 | 54.59% | 5.550<br>957 | Fdx1              |
| 270035                              | 2115 | 24 | 41.80% | 3.1866<br>66 | 14 | 30.12% | 1.860<br>972 | Letm2             |
| 18628                               | 5953 | 24 | 17.13% | 1.1321<br>69 | 26 | 18.14% | 1.227<br>89  | Per3              |
| 16178                               | 1360 | 24 | 61.18% | 4.9557<br>35 | 21 | 51.99% | 4.341<br>127 | Il1r2             |
| 1E+08                               | 1579 | 24 | 50.22% | 4.2683<br>97 | 17 | 25.14% | 3.026<br>836 | D830025<br>C05Rik |
| gi 146198858 ref N<br>M_183142.3    | 1497 | 24 | 59.59% | 4.5022<br>04 | 8  | 25.58% | 1.502<br>416 | -                 |
| 27384                               | 1232 | 24 | 54.14% | 5.4706<br>16 | 24 | 52.27% | 5.476<br>747 | Akr1c13           |
| 234086                              | 1579 | 24 | 49.53% | 4.2683<br>97 | 33 | 50.98% | 5.875<br>623 | Erich1            |
| 70025                               | 1505 | 24 | 42.99% | 4.4782<br>72 | 27 | 45.98% | 5.043<br>702 | Acot7             |
| 73242                               | 2068 | 24 | 38.68% | 3.2590<br>9  | 13 | 21.62% | 1.767<br>319 | Atat1             |
| 1E+08                               | 3810 | 24 | 2.31%  | 1.7689<br>76 | 25 | 2.34%  | 1.844<br>748 | Gm4229            |
| 66060                               | 595  | 24 | 47.23% | 11.327<br>39 | 23 | 67.23% | 10.86<br>758 | 0610010<br>O12Rik |
| 67867                               | 2978 | 24 | 26.06% | 2.2631<br>96 | 14 | 15.72% | 1.321<br>677 | Lrrc28            |
| 241627                              | 4294 | 24 | 23.13% | 1.5695<br>85 | 22 | 20.28% | 1.440<br>399 | Wdr76             |
| gi 149269130 ref X<br>M_001479053.1 | 2058 | 24 | 38.97% | 3.2749<br>27 | 10 | 14.77% | 1.366<br>082 | -                 |
| 270192                              | 4734 | 24 | 22.01% | 1.4237<br>01 | 19 | 16.65% | 1.128<br>359 | Rab6b             |
| 269336                              | 1870 | 24 | 35.40% | 3.6041<br>71 | 23 | 37.59% | 3.457<br>867 | Ccdc32            |
| 107448                              | 3974 | 24 | 22.75% | 1.6959<br>74 | 18 | 20.33% | 1.273<br>406 | Unc5a             |
| 73724                               | 714  | 24 | 63.59% | 9.4394<br>95 | 30 | 82.63% | 11.81<br>259 | Mcee              |
| 15473                               | 1011 | 24 | 56.38% | 6.6664<br>68 | 30 | 69.73% | 8.342<br>423 | Hrsp12            |
| 76263                               | 930  | 24 | 76.77% | 7.2470<br>96 | 21 | 64.62% | 6.348<br>315 | Gstk1             |
| 94352                               | 5186 | 24 | 13.38% | 1.2996<br>14 | 17 | 11.01% | 0.921<br>592 | Loxl2             |

|                                 |      |    |        |              |    |        |              |                   |
|---------------------------------|------|----|--------|--------------|----|--------|--------------|-------------------|
| 103836                          | 1949 | 24 | 41%    | 3.4580<br>81 | 18 | 33.76% | 2.596<br>467 | Zfp692            |
| 67657                           | 2022 | 24 | 38.33% | 3.3332<br>34 | 23 | 41.15% | 3.197<br>929 | Rabl3             |
| 72147                           | 2577 | 24 | 31.82% | 2.6153<br>66 | 21 | 20.99% | 2.291<br>01  | Zbtb46            |
| 433940                          | 2717 | 24 | 31.95% | 2.4806<br>03 | 24 | 34.04% | 2.483<br>383 | BC0570<br>22      |
| 74254                           | 1847 | 24 | 38.77% | 3.6490<br>52 | 28 | 49.32% | 4.261<br>998 | Gpn1              |
| 76498                           | 2507 | 24 | 30.36% | 2.6883<br>92 | 13 | 22.22% | 1.457<br>844 | Paqr4             |
| 243362                          | 5638 | 24 | 13.94% | 1.1954<br>24 | 22 | 13.85% | 1.097<br>033 | Stard13           |
| gi 94377694 ref X<br>R_005173.1 | 3889 | 24 | 20.55% | 1.7330<br>42 | 24 | 24.97% | 1.734<br>984 | -                 |
| 13641                           | 3258 | 24 | 28.02% | 2.0686<br>92 | 22 | 24%    | 1.898<br>426 | Efnb1             |
| 223722                          | 1893 | 24 | 38.72% | 3.5603<br>8  | 11 | 19.65% | 1.633<br>669 | Mcat              |
| 68743                           | 5421 | 24 | 18.54% | 1.2432<br>76 | 22 | 17.87% | 1.140<br>947 | Anln              |
| 71445                           | 3732 | 24 | 19.86% | 1.8059<br>48 | 12 | 9.75%  | 0.903<br>986 | 5530601<br>H04Rik |
| 77532                           | 2952 | 24 | 29.71% | 2.2831<br>3  | 15 | 24.25% | 1.428<br>555 | Jrk1              |
| 94226                           | 2512 | 24 | 35.67% | 2.6830<br>41 | 9  | 17.56% | 1.007<br>268 | S1pr5             |
| 106618                          | 6068 | 24 | 17.50% | 1.1107<br>12 | 23 | 15.47% | 1.065<br>625 | Wdr90             |
| 20589                           | 5562 | 24 | 18.02% | 1.2117<br>58 | 12 | 9.62%  | 0.606<br>558 | Ighmbp2           |
| 58809                           | 1837 | 24 | 39.09% | 3.6689<br>16 | 15 | 29.45% | 2.295<br>642 | Rnase4            |
| 117171                          | 1116 | 24 | 62.10% | 6.0392<br>47 | 25 | 54.30% | 6.297<br>931 | 1110038<br>F14Rik |
| 68563                           | 404  | 24 | 78.22% | 16.682<br>67 | 23 | 77.72% | 16.00<br>548 | Dpm3              |
| 26404                           | 5528 | 24 | 18.99% | 1.2192<br>11 | 22 | 15.30% | 1.118<br>863 | Map3k1<br>2       |
| 58239                           | 1394 | 24 | 40.82% | 4.8348<br>63 | 22 | 49.07% | 4.436<br>924 | Dexi              |
| 13870                           | 1241 | 24 | 55.28% | 5.4309<br>42 | 23 | 49.72% | 5.210<br>485 | Ercc1             |



|                                     |      |    |        |              |    |        |              |                   |
|-------------------------------------|------|----|--------|--------------|----|--------|--------------|-------------------|
| 18679                               | 6115 | 24 | 17.51% | 1.1021<br>75 | 25 | 17.02% | 1.149<br>385 | Phka1             |
| gi 149267123 ref X<br>M_001477181.1 | 1105 | 24 | 48.33% | 6.0993<br>66 | 15 | 40.63% | 3.816<br>375 | -                 |
| 18752                               | 2715 | 24 | 37.09% | 2.4824<br>31 | 13 | 20.41% | 1.346<br>157 | Prkcg             |
| 243653                              | 3268 | 24 | 28.03% | 2.0623<br>62 | 57 | 47.55% | 4.903<br>599 | Clec1a            |
| 230696                              | 1867 | 24 | 41.67% | 3.6099<br>62 | 10 | 25.44% | 1.505<br>836 | AU0222<br>52      |
| 106877                              | 3403 | 24 | 24.65% | 1.9805<br>46 | 36 | 37.58% | 2.974<br>149 | Afap111           |
| 67736                               | 2099 | 24 | 37.35% | 3.2109<br>57 | 30 | 46.16% | 4.018<br>194 | Ccdc130           |
| 12752                               | 2487 | 24 | 22.56% | 2.7100<br>12 | 22 | 17.09% | 2.486<br>961 | Cln3              |
| 68603                               | 1204 | 23 | 54.73% | 5.3645<br>96 | 15 | 36.79% | 3.502<br>571 | Pmvk              |
| 14913                               | 917  | 23 | 34.13% | 7.0435<br>92 | 24 | 48.85% | 7.358<br>072 | Guca1a            |
| 56295                               | 1873 | 23 | 14.68% | 3.4484<br>65 | 34 | 22.42% | 5.103<br>443 | Higd1a            |
| 59050                               | 2686 | 23 | 12.03% | 2.4046<br>81 | 34 | 10.20% | 3.558<br>73  | Nsa2              |
| 52023                               | 3271 | 23 | 25.86% | 1.9746<br>18 | 15 | 20.88% | 1.289<br>237 | Pibf1             |
| 75430                               | 799  | 23 | 57.45% | 8.0838<br>22 | 19 | 61.95% | 6.685<br>424 | 3200002<br>M19Rik |
| 56368                               | 1782 | 23 | 35.63% | 3.6245<br>65 | 31 | 40.52% | 4.890<br>757 | Cyb561d<br>2      |
| 18671                               | 4977 | 23 | 21.22% | 1.2977<br>65 | 12 | 11.35% | 0.677<br>853 | Abcb1a            |
| gi 241897000 ref N<br>M_028365.1    | 2829 | 23 | 31.14% | 2.2831<br>3  | 8  | 11.49% | 0.795<br>022 | -                 |
| 58520                               | 1185 | 23 | 60.93% | 5.4506<br>11 | 21 | 43.29% | 4.982<br>222 | 0610007<br>P14Rik |
| 68033                               | 778  | 23 | 76.22% | 8.3020<br>23 | 23 | 72.11% | 8.311<br>327 | Cox19             |
| 70612                               | 1606 | 23 | 41.84% | 4.0217<br>77 | 23 | 44.83% | 4.026<br>284 | 5730494<br>N06Rik |
| 20826                               | 1257 | 23 | 12.09% | 5.1384<br>04 | 26 | 14.16% | 5.815<br>14  | Nhp211            |
| 70325                               | 2677 | 23 | 31.04% | 2.4127<br>66 | 22 | 31.90% | 2.310<br>449 | Pigw              |

|                                  |      |    |        |              |    |        |              |                   |
|----------------------------------|------|----|--------|--------------|----|--------|--------------|-------------------|
| 665211                           | 4725 | 23 | 15.56% | 1.3669<br>79 | 17 | 13.29% | 1.011<br>508 | Gm1432<br>6       |
| 216011                           | 2636 | 23 | 30.58% | 2.4502<br>94 | 7  | 13.01% | 0.746<br>577 | Lrrc20            |
| 74694                            | 5713 | 23 | 17.57% | 1.1305<br>75 | 14 | 11.75% | 0.688<br>947 | Tbc1d30           |
| gi 149274739 ref X<br>M_914287.2 | 732  | 23 | 46.04% | 8.8237<br>35 | 63 | 50.55% | 24.19<br>645 | -                 |
| 66220                            | 1194 | 23 | 53.18% | 5.4095<br>26 | 15 | 39.78% | 3.531<br>905 | Zdhhc12           |
| 77963                            | 4252 | 23 | 23.80% | 1.5190<br>44 | 6  | 6.91%  | 0.396<br>716 | Hook1             |
| 217216                           | 2543 | 23 | 39.28% | 2.5399<br>03 | 13 | 20.53% | 1.437<br>206 | BC0308<br>67      |
| 52592                            | 2566 | 23 | 34.72% | 2.5171<br>37 | 16 | 28.41% | 1.753<br>014 | Brms11            |
| 223626                           | 1600 | 23 | 46.31% | 4.0368<br>59 | 18 | 41.44% | 3.162<br>821 | 4930572<br>J05Rik |
| 56150                            | 1725 | 23 | 34.38% | 3.7443<br>33 | 23 | 33.28% | 3.748<br>529 | Mad211            |
| 73710                            | 1922 | 23 | 34.03% | 3.3605<br>48 | 21 | 30.75% | 3.071<br>765 | Tubb2b            |
| 76355                            | 2265 | 23 | 31.13% | 2.8516<br>44 | 7  | 6.71%  | 0.868<br>864 | Tgds              |
| 74183                            | 3849 | 23 | 23.10% | 1.6780<br>91 | 26 | 29.41% | 1.899<br>099 | 2310042<br>D19Rik |
| 108853                           | 2621 | 23 | 29.84% | 2.4643<br>17 | 19 | 26.63% | 2.038<br>021 | Mtrf11            |
| 210104                           | 3381 | 23 | 24.93% | 1.9103<br>74 | 19 | 25.11% | 1.579<br>903 | Zfp658            |
| 17951                            | 5368 | 23 | 13.28% | 1.2032<br>37 | 27 | 12.41% | 1.414<br>078 | Naip5             |
| 26378                            | 2051 | 23 | 27.30% | 3.1491<br>83 | 26 | 22.28% | 3.563<br>935 | Decr2             |
| 56749                            | 2318 | 23 | 33.22% | 2.7864<br>43 | 17 | 28.65% | 2.061<br>853 | Dhodh             |
| gi 198278438 ref N<br>M_173350.2 | 3136 | 23 | 4.05%  | 2.0596<br>22 | 15 | 3.51%  | 1.344<br>737 | -                 |
| 231042                           | 2909 | 23 | 29.98% | 2.2203<br>42 | 14 | 20.18% | 1.353<br>027 | Nupl2             |
| 67267                            | 473  | 23 | 77.59% | 13.655<br>34 | 20 | 80.76% | 11.88<br>751 | 2900010<br>M23Rik |
| 60534                            | 2723 | 23 | 27.73% | 2.3720<br>07 | 10 | 17.37% | 1.032<br>463 | Fancg             |

|                                     |       |    |        |              |    |        |              |                   |
|-------------------------------------|-------|----|--------|--------------|----|--------|--------------|-------------------|
| 68572                               | 734   | 23 | 76.84% | 8.7996<br>92 | 22 | 58.45% | 8.426<br>529 | Ict1              |
| 244238                              | 3777  | 23 | 19.20% | 1.7100<br>81 | 12 | 12.15% | 0.893<br>216 | Mrgpre            |
| 103172                              | 948   | 23 | 50.32% | 6.8132<br>64 | 17 | 50.32% | 5.041<br>534 | Chchd10           |
| 66515                               | 5546  | 23 | 17.08% | 1.1646<br>18 | 16 | 11.68% | 0.811<br>077 | Cul7              |
| 69028                               | 1229  | 23 | 58.34% | 5.2554<br>71 | 11 | 33.85% | 2.516<br>303 | Mitd1             |
| 230162                              | 3010  | 23 | 28.57% | 2.1458<br>39 | 28 | 38.44% | 2.615<br>253 | Zfp189            |
| 110350                              | 13972 | 23 | 7.96%  | 0.4622<br>8  | 12 | 3.64%  | 0.241<br>46  | Dync2h1           |
| 72136                               | 2089  | 23 | 39.40% | 3.0918<br>98 | 8  | 16.42% | 1.076<br>648 | Chst14            |
| 57440                               | 3658  | 23 | 20.89% | 1.7657<br>12 | 4  | 5.36%  | 0.307<br>424 | Ehd3              |
| 1E+08                               | 786   | 23 | 8.65%  | 8.2175<br>24 | 24 | 8.91%  | 8.584<br>417 | Gm1986            |
| gi 149257880 ref X<br>M_001475098.1 | 3791  | 23 | 11.50% | 1.7037<br>65 | 33 | 12.11% | 2.447<br>272 | -                 |
| 72027                               | 2249  | 23 | 38.33% | 2.8719<br>32 | 14 | 24.68% | 1.750<br>091 | Slc39a4           |
| 21915                               | 1006  | 23 | 53.68% | 6.4204<br>51 | 19 | 49.01% | 5.309<br>795 | Dtymk             |
| gi 40556365 ref N<br>M_199302.1     | 3994  | 23 | 23.28% | 1.6171<br>69 | 13 | 13.92% | 0.915<br>077 | -                 |
| 66291                               | 927   | 23 | 43.04% | 6.9676<br>1  | 13 | 38.51% | 3.942<br>627 | 1810030<br>N24Rik |
| 68255                               | 1251  | 23 | 52.12% | 5.1630<br>49 | 11 | 38.69% | 2.472<br>051 | Tmem86<br>b       |
| 230848                              | 7208  | 23 | 12.24% | 0.8960<br>84 | 14 | 7.73%  | 0.546<br>054 | Zbtb40            |
| 12577                               | 1952  | 23 | 27.66% | 3.3089<br>01 | 34 | 40.73% | 4.896<br>9   | Cdkn1c            |
| 56844                               | 1394  | 23 | 49.71% | 4.6334<br>1  | 18 | 46.05% | 3.630<br>211 | Tssc4             |
| 234384                              | 955   | 23 | 62.72% | 6.7633<br>24 | 17 | 49.01% | 5.004<br>58  | Mpv17l2           |
| 74386                               | 3607  | 23 | 16.61% | 1.7906<br>78 | 25 | 17.66% | 1.948<br>57  | Rmi1              |
| 211389                              | 2349  | 23 | 42.66% | 2.7496<br>7  | 10 | 17.62% | 1.196<br>848 | Suox              |

|                                 |      |    |        |              |    |        |              |                   |
|---------------------------------|------|----|--------|--------------|----|--------|--------------|-------------------|
| 68526                           | 4886 | 23 | 19.77% | 1.3219<br>35 | 14 | 12.36% | 0.805<br>558 | Gpr155            |
| 59093                           | 2175 | 23 | 33.79% | 2.9696<br>43 | 16 | 34.76% | 2.068<br>154 | Pcbp3             |
| 16797                           | 1260 | 23 | 46.75% | 5.1261<br>7  | 3  | 11.67% | 0.669<br>38  | Lat               |
| 103080                          | 2549 | 23 | 30.40% | 2.5339<br>25 | 12 | 20.24% | 1.323<br>529 | 10-Sep            |
| 67370                           | 4736 | 23 | 18.39% | 1.3638<br>04 | 22 | 19.81% | 1.305<br>97  | Zfp606            |
| 52633                           | 1292 | 23 | 56.11% | 4.9992<br>06 | 27 | 59.98% | 5.875<br>21  | Nit2              |
| gi 118130029 ref NM_011812.3    | 5832 | 23 | 14.54% | 1.1075<br>06 | 19 | 10.55% | 0.915<br>921 | -                 |
| 231717                          | 2335 | 23 | 33.70% | 2.7661<br>56 | 14 | 23.60% | 1.685<br>634 | Fam109a           |
| 321003                          | 3236 | 23 | 28.49% | 1.9959<br>75 | 14 | 20.58% | 1.216<br>303 | Xpnpep3           |
| 71878                           | 2280 | 23 | 35.44% | 2.8328<br>83 | 24 | 37.89% | 2.959<br>365 | Fam83d            |
| 12544                           | 2161 | 23 | 34.29% | 2.9888<br>82 | 15 | 24.29% | 1.951<br>455 | Cdc45             |
| gi 149255640 ref XM_001476703.1 | 932  | 23 | 8.91%  | 6.9302<br>3  | 27 | 9.98%  | 8.144<br>604 | -                 |
| 78914                           | 2632 | 23 | 31.50% | 2.4540<br>18 | 12 | 18.54% | 1.281<br>792 | Nadsyn1           |
| 101831                          | 1788 | 23 | 48.43% | 3.6124<br>02 | 20 | 42.39% | 3.144<br>739 | C230052<br>I12Rik |
| 14070                           | 2490 | 23 | 36.39% | 2.5939<br>66 | 15 | 22.53% | 1.693<br>612 | F8a               |
| 78921                           | 3878 | 23 | 22.69% | 1.6655<br>43 | 20 | 19.93% | 1.449<br>921 | 9130019<br>O22Rik |
| 67509                           | 2314 | 23 | 25.41% | 2.7912<br>59 | 39 | 34.57% | 4.738<br>309 | 1810063<br>B07Rik |
| 56299                           | 1173 | 23 | 71.01% | 5.5063<br>72 | 13 | 44.84% | 3.115<br>785 | Fkbpl             |
| 382066                          | 3408 | 23 | 26.67% | 1.8952<br>39 | 9  | 12.94% | 0.742<br>446 | Prdm10            |
| 216858                          | 2740 | 23 | 27.52% | 2.3572<br>9  | 23 | 29.09% | 2.359<br>931 | Kctd11            |
| 12442                           | 1541 | 23 | 50.36% | 4.1914<br>17 | 34 | 59.38% | 6.202<br>952 | Ccnb2             |
| 170776                          | 1569 | 23 | 41.36% | 4.1166<br>18 | 14 | 25.75% | 2.508<br>576 | Cd209c            |

|                                  |       |    |        |              |    |        |              |                   |
|----------------------------------|-------|----|--------|--------------|----|--------|--------------|-------------------|
| 234723                           | 1796  | 23 | 44.82% | 3.5963<br>11 | 27 | 50.89% | 4.226<br>487 | Txn14b            |
| 67553                            | 2633  | 23 | 38.78% | 2.4530<br>86 | 16 | 28.22% | 1.708<br>407 | Gstcd             |
| 104884                           | 2073  | 23 | 42.31% | 3.1157<br>62 | 17 | 35.21% | 2.305<br>535 | Tdp1              |
| 230721                           | 3038  | 23 | 10.66% | 2.1260<br>61 | 31 | 12.90% | 2.868<br>772 | Pabpc4            |
| 16182                            | 4158  | 23 | 19.31% | 1.5533<br>85 | 4  | 4.71%  | 0.270<br>457 | Il18r1            |
| gi 153791709 ref N<br>R_003631.1 | 10063 | 23 | 4.98%  | 0.6418<br>54 | 24 | 6.80%  | 0.670<br>511 | -                 |
| 12771                            | 3273  | 23 | 24.72% | 1.9734<br>11 | 32 | 35.72% | 2.748<br>692 | Ccr3              |
| 72103                            | 3184  | 23 | 23.08% | 2.0285<br>72 | 19 | 24.18% | 1.677<br>655 | Ap1f              |
| gi 13324685 ref N<br>M_024214.1  | 1024  | 23 | 9.38%  | 6.3075<br>92 | 30 | 9.47%  | 8.236<br>514 | -                 |
| 27364                            | 3699  | 23 | 25.41% | 1.7461<br>41 | 19 | 20.36% | 1.444<br>08  | Srr               |
| 68070                            | 13413 | 23 | 7.60%  | 0.4815<br>46 | 19 | 6.11%  | 0.398<br>245 | Pdzd2             |
| 97863                            | 1381  | 23 | 41.78% | 4.6770<br>27 | 18 | 35.34% | 3.664<br>384 | C78339            |
| 67880                            | 918   | 23 | 57.84% | 7.0359<br>2  | 25 | 64.92% | 7.656<br>309 | Dcxr              |
| 69020                            | 1816  | 22 | 43.28% | 3.4020<br>65 | 14 | 30.78% | 2.167<br>376 | Zfp707            |
| 74477                            | 4332  | 22 | 22%    | 1.4261<br>66 | 13 | 14.04% | 0.843<br>679 | 4933427<br>D14Rik |
| 214111                           | 5244  | 22 | 15.03% | 1.1781<br>37 | 31 | 22.96% | 1.661<br>962 | Slc24a1           |
| 99011                            | 2838  | 22 | 31.89% | 2.1769<br>38 | 27 | 34.67% | 2.674<br>69  | Pomt1             |
| 24058                            | 1990  | 22 | 38.24% | 3.1045<br>98 | 6  | 12.36% | 0.847<br>657 | Sigirr            |
| 71941                            | 1867  | 22 | 42.80% | 3.3091<br>32 | 16 | 30.96% | 2.409<br>338 | Cars2             |
| 68423                            | 2155  | 22 | 34.85% | 2.8668<br>91 | 22 | 35.17% | 2.870<br>103 | Ankrd13<br>d      |
| 13134                            | 5225  | 22 | 18.01% | 1.1824<br>21 | 3  | 2.81%  | 0.161<br>42  | Dach1             |
| 108961                           | 3705  | 22 | 22.70% | 1.6675<br>17 | 25 | 26.37% | 1.897<br>029 | E2f8              |

|                              |      |    |        |              |    |        |              |                   |
|------------------------------|------|----|--------|--------------|----|--------|--------------|-------------------|
| gi 148747236 ref NM_026693.4 | 651  | 22 | 33.79% | 9.4902<br>45 | 22 | 34.87% | 9.500<br>879 | -                 |
| 225283                       | 4297 | 22 | 23.09% | 1.4377<br>82 | 25 | 22.20% | 1.635<br>674 | Rprd1a            |
| 66078                        | 1555 | 22 | 38.33% | 3.9730<br>86 | 17 | 35.88% | 3.073<br>553 | Tsen34            |
| 664994                       | 1088 | 22 | 56.07% | 5.6784<br>46 | 18 | 51.47% | 4.651<br>208 | Isoc2a            |
| 12447                        | 2022 | 22 | 42.78% | 3.0554<br>64 | 16 | 31.75% | 2.224<br>646 | Ccne1             |
| 108689                       | 1878 | 22 | 43.34% | 3.2897<br>49 | 73 | 71.41% | 10.92<br>822 | Obfc1             |
| 54525                        | 6834 | 22 | 13.56% | 0.9040<br>31 | 22 | 12.25% | 0.905<br>044 | Syt7              |
| 75692                        | 1184 | 22 | 40.20% | 5.2180<br>31 | 16 | 25.93% | 3.799<br>185 | Nr2c2ap           |
| 20299                        | 1815 | 22 | 46.56% | 3.4039<br>39 | 19 | 43.31% | 2.943<br>06  | Ccl22             |
| 72776                        | 4241 | 22 | 19.59% | 1.4567<br>67 | 17 | 17.83% | 1.126<br>945 | Sass6             |
| 66459                        | 5410 | 22 | 9.98%  | 1.1419<br>87 | 37 | 20.15% | 1.922<br>767 | Pigy              |
| 449521                       | 2686 | 22 | 34.07% | 2.3001<br>3  | 16 | 24.72% | 1.674<br>696 | Zfp213            |
| 68519                        | 4160 | 22 | 9.83%  | 1.4851<br>32 | 15 | 8.65%  | 1.013<br>725 | Eml1              |
| 66293                        | 2014 | 22 | 35.30% | 3.0676<br>01 | 28 | 37.24% | 3.908<br>595 | 1810032<br>O08Rik |
| 225289                       | 5375 | 22 | 17.80% | 1.1494<br>23 | 31 | 22.79% | 1.621<br>457 | AW5549<br>18      |
| 72128                        | 4229 | 22 | 21.99% | 1.4609<br>01 | 9  | 10.43% | 0.598<br>311 | 2610008<br>E11Rik |
| 23936                        | 3952 | 22 | 23.41% | 1.5632<br>97 | 21 | 22.85% | 1.493<br>91  | Lynx1             |
| 71838                        | 1984 | 22 | 35.94% | 3.1139<br>86 | 26 | 43.90% | 3.684<br>29  | Phf7              |
| 192970                       | 1421 | 22 | 37.86% | 4.3477<br>47 | 16 | 45.95% | 3.165<br>542 | Dhrs11            |
| 208922                       | 5792 | 22 | 14.45% | 1.0666<br>69 | 36 | 26.24% | 1.747<br>415 | Cpeb3             |
| 19891                        | 1782 | 22 | 42.65% | 3.4669<br>75 | 8  | 22%    | 1.262<br>131 | Rpa2              |
| 244954                       | 2525 | 22 | 27.68% | 2.4467<br>92 | 9  | 12.04% | 1.002<br>082 | Prss35            |

|        |      |    |        |              |    |        |              |                   |
|--------|------|----|--------|--------------|----|--------|--------------|-------------------|
| 71640  | 3497 | 22 | 24.56% | 1.7667       | 14 | 16.13% | 1.125<br>523 | Zfp949            |
| 67235  | 1992 | 22 | 40.46% | 3.1014<br>81 | 21 | 43.22% | 2.963<br>822 | Zkscan1<br>4      |
| 15574  | 4581 | 22 | 19.10% | 1.3486<br>46 | 18 | 16.83% | 1.104<br>675 | Hus1              |
| 56707  | 7134 | 22 | 12.78% | 0.8660<br>15 | 19 | 11.44% | 0.748<br>76  | Zfp111            |
| 13436  | 4327 | 22 | 21.33% | 1.4278<br>14 | 11 | 9.64%  | 0.714<br>707 | Dnmt3b            |
| 233199 | 3624 | 22 | 23.10% | 1.7047<br>87 | 10 | 12.61% | 0.775<br>772 | Mybpc2            |
| 66230  | 738  | 22 | 56.50% | 8.3714<br>76 | 26 | 77.10% | 9.904<br>649 | Mrps28            |
| 67131  | 2081 | 22 | 33.35% | 2.9688<br>37 | 22 | 37.82% | 2.972<br>164 | Acbd4             |
| 102032 | 1476 | 22 | 44.38% | 4.1857<br>38 | 21 | 38.48% | 3.999<br>955 | AI31680<br>7      |
| 68202  | 549  | 22 | 71.95% | 11.253<br>46 | 35 | 73.77% | 17.92<br>329 | Ndufa5            |
| 24000  | 5697 | 22 | 16.45% | 1.0844<br>57 | 10 | 7.78%  | 0.493<br>487 | Ptpn21            |
| 67150  | 952  | 22 | 45.69% | 6.4896<br>52 | 8  | 25.53% | 2.362<br>518 | Rnf141            |
| 107686 | 508  | 22 | 49.21% | 12.161<br>71 | 34 | 67.13% | 18.81<br>643 | Snrpd2            |
| 68106  | 1427 | 22 | 36.51% | 4.3294<br>67 | 30 | 32.73% | 5.910<br>434 | Nt5c3l            |
| 270106 | 794  | 22 | 9.07%  | 7.7810<br>44 | 42 | 9.19%  | 14.87<br>137 | Rpl13             |
| 319587 | 510  | 22 | 39.61% | 12.114<br>02 | 12 | 30.39% | 6.615<br>051 | 4930539<br>J05Rik |
| 69961  | 839  | 22 | 72.23% | 7.3637<br>06 | 9  | 38.74% | 3.015<br>801 | 2810432<br>D09Rik |
| 52856  | 1699 | 22 | 43.20% | 3.6363<br>44 | 10 | 27.78% | 1.654<br>736 | Gtpbp5            |
| 56278  | 1547 | 22 | 40.85% | 3.9936<br>32 | 18 | 36.01% | 3.271<br>179 | Gkap1             |
| 102774 | 2542 | 22 | 31.04% | 2.4304<br>28 | 12 | 19.35% | 1.327<br>174 | Bbs4              |
| 72787  | 2576 | 22 | 31.02% | 2.3983<br>5  | 24 | 30.90% | 2.619<br>314 | Tmem48            |
| 80515  | 1779 | 22 | 41.60% | 3.4728<br>21 | 10 | 21.25% | 1.580<br>324 | A030009<br>H04Rik |

|                                  |      |    |        |              |    |        |              |                   |
|----------------------------------|------|----|--------|--------------|----|--------|--------------|-------------------|
| 73225                            | 2560 | 22 | 24.02% | 2.4133<br>4  | 9  | 11.09% | 0.988<br>382 | Fam118a           |
| 106821                           | 1135 | 22 | 48.28% | 5.4433<br>03 | 25 | 49.52% | 6.192<br>504 | AI31497<br>6      |
| 319317                           | 5864 | 22 | 15.33% | 1.0535<br>73 | 23 | 15.57% | 1.102<br>696 | Snhg11            |
| 50776                            | 1585 | 22 | 43.22% | 3.8978<br>86 | 18 | 35.77% | 3.192<br>753 | Polg2             |
| 59009                            | 5199 | 22 | 17.62% | 1.1883<br>34 | 16 | 12.50% | 0.865<br>211 | Sh3rf1            |
| 433323                           | 3998 | 22 | 21.14% | 1.5453<br>1  | 12 | 7.25%  | 0.843<br>841 | Sgpp2             |
| 68169                            | 4684 | 22 | 22.16% | 1.3189<br>9  | 5  | 4.82%  | 0.300<br>106 | Ndnf              |
| gi 149268619 ref X<br>M_139814.9 | 3149 | 22 | 20.58% | 1.9619<br>4  | 15 | 14.89% | 1.339<br>185 | -                 |
| 59002                            | 1600 | 22 | 47.06% | 3.8613<br>43 | 18 | 38.19% | 3.162<br>821 | Wdr8              |
| 67871                            | 2251 | 22 | 23.72% | 2.7446<br>24 | 19 | 20.39% | 2.373<br>014 | Mrrf              |
| 73833                            | 1285 | 22 | 43.04% | 4.8078<br>98 | 24 | 48.40% | 5.250<br>857 | Fam98c            |
| 211556                           | 2391 | 22 | 27.31% | 2.5839<br>19 | 24 | 25.05% | 2.821<br>979 | Ap1ar             |
| 16159                            | 1303 | 22 | 45.74% | 4.7414<br>81 | 14 | 36.07% | 3.020<br>687 | Il12a             |
| 72502                            | 3581 | 22 | 22.01% | 1.7252<br>58 | 16 | 15.69% | 1.256<br>139 | Cwf1911           |
| 638247                           | 3162 | 22 | 21.22% | 1.9538<br>74 | 15 | 16.54% | 1.333<br>68  | 9530082<br>P21Rik |
| 69226                            | 1948 | 22 | 37.27% | 3.1715<br>34 | 18 | 35.32% | 2.597<br>8   | Snx24             |
| 104111                           | 4727 | 22 | 18.49% | 1.3069<br>92 | 11 | 8.78%  | 0.654<br>228 | Adcy3             |
| 67861                            | 1341 | 22 | 56.15% | 4.6071<br>21 | 18 | 47.50% | 3.773<br>687 | Akr1b10           |
| 68026                            | 2387 | 22 | 28.03% | 2.5882<br>49 | 18 | 27.78% | 2.120<br>031 | 2810417<br>H13Rik |
| 140497                           | 1139 | 22 | 44.42% | 5.4241<br>87 | 4  | 17.21% | 0.987<br>321 | AF25170<br>5      |
| 83430                            | 1359 | 22 | 40.77% | 4.5460<br>99 | 38 | 65.78% | 7.861<br>153 | Il23a             |
| 239099                           | 5788 | 22 | 17.16% | 1.0674<br>07 | 9  | 5.63%  | 0.437<br>156 | Homez             |



|                                 |      |    |        |              |    |        |              |         |
|---------------------------------|------|----|--------|--------------|----|--------|--------------|---------|
| 56405                           | 1443 | 22 | 50.03% | 4.2814<br>62 | 48 | 68.47% | 9.351<br>839 | Dusp14  |
| 22751                           | 2632 | 22 | 32.71% | 2.3473<br>21 | 17 | 24.77% | 1.815<br>872 | Zfp90   |
| 224613                          | 2509 | 22 | 34.64% | 2.4623<br>95 | 23 | 35.03% | 2.577<br>207 | Flywch1 |
| 57444                           | 1098 | 22 | 59.47% | 5.6267<br>3  | 30 | 75.68% | 7.681<br>412 | Isg20   |
| 58245                           | 2877 | 22 | 26.21% | 2.1474<br>28 | 20 | 21.24% | 1.954<br>395 | Gpr180  |
| 67873                           | 2149 | 22 | 35.97% | 2.8748<br>95 | 10 | 21.08% | 1.308<br>235 | Mri1    |
| 71591                           | 3514 | 22 | 26.72% | 1.7581<br>53 | 8  | 11.16% | 0.640<br>045 | Zfp251  |
| 67161                           | 3020 | 22 | 29.07% | 2.0457<br>45 | 14 | 21.16% | 1.303<br>296 | Sc1t1   |
| 27059                           | 6414 | 22 | 14.83% | 0.9632<br>29 | 18 | 12.68% | 0.788<br>979 | Sh3d19  |
| 232339                          | 5704 | 22 | 15.06% | 1.0831<br>26 | 10 | 7.73%  | 0.492<br>882 | Ankrd26 |
| 225895                          | 2366 | 22 | 21.22% | 2.6112<br>21 | 19 | 21.34% | 2.257<br>673 | Taf6l   |
| 71131                           | 3637 | 22 | 20.68% | 1.6986<br>94 | 16 | 14.93% | 1.236<br>798 | Zfp689  |
| 66495                           | 532  | 22 | 61.28% | 11.613<br>06 | 54 | 75.75% | 28.53<br>673 | Ndufb3  |
| 79059                           | 724  | 22 | 64.78% | 8.5333<br>55 | 22 | 61.46% | 8.542<br>918 | Nme3    |
| gi 114145468 ref NM_018831.3    | 4094 | 22 | 21.03% | 1.5090<br>74 | 12 | 12.04% | 0.824<br>054 | -       |
| 224805                          | 3368 | 22 | 25.42% | 1.8343<br>67 | 22 | 27.61% | 1.836<br>423 | Aars2   |
| gi 149274182 ref XM_001479896.1 | 552  | 22 | 46.56% | 11.192<br>3  | 9  | 33.15% | 4.583<br>799 | -       |
| 233081                          | 903  | 22 | 74.31% | 6.8418<br>04 | 12 | 40.75% | 3.736<br>075 | Ffar1   |
| 56772                           | 2514 | 22 | 33.65% | 2.4574<br>98 | 17 | 26.69% | 1.901<br>104 | Mllt11  |
| 280408                          | 1489 | 22 | 41.44% | 4.1491<br>94 | 16 | 39.15% | 3.020<br>977 | Rilp    |
| gi 141802243 ref NM_011221.2    | 1145 | 22 | 51.44% | 5.3957<br>63 | 21 | 51.09% | 5.156<br>273 | -       |
| 1E+08                           | 2129 | 22 | 24.99% | 2.9019<br>02 | 10 | 16.53% | 1.320<br>524 | Gm3065  |

|                              |       |    |        |              |    |        |              |              |
|------------------------------|-------|----|--------|--------------|----|--------|--------------|--------------|
| 105611                       | 2100  | 22 | 9.81%  | 2.9419<br>76 | 7  | 7.95%  | 0.937<br>132 | AU0400<br>96 |
| 271981                       | 3396  | 22 | 27.97% | 1.8192<br>43 | 11 | 15.25% | 0.910<br>641 | Tbck         |
| 67096                        | 1950  | 22 | 40.67% | 3.1682<br>82 | 23 | 38.87% | 3.316<br>006 | Mmachc       |
| 17075                        | 2061  | 22 | 32.07% | 2.9976<br>46 | 13 | 24.11% | 1.773<br>321 | Epcam        |
| 1E+08                        | 2987  | 22 | 26.82% | 2.0683<br>46 | 10 | 13.06% | 0.941<br>211 | Pydc3        |
| 28036                        | 2135  | 21 | 17%    | 2.7622<br>13 | 36 | 23.56% | 4.740<br>528 | Larp7        |
| 20863                        | 412   | 21 | 83.50% | 14.313<br>89 | 10 | 67.96% | 6.823<br>778 | Stfa3        |
| 80915                        | 1413  | 21 | 56.33% | 4.1736<br>19 | 15 | 39.07% | 2.984<br>497 | Dusp12       |
| 68201                        | 2097  | 21 | 26.70% | 2.8122<br>67 | 13 | 26.90% | 1.742<br>878 | Ccdc34       |
| 329152                       | 11179 | 21 | 8.79%  | 0.5275<br>36 | 12 | 5.26%  | 0.301<br>787 | Hecw2        |
| 101113                       | 1520  | 21 | 45.20% | 3.8798<br>19 | 14 | 38.75% | 2.589<br>444 | Snx21        |
| 71956                        | 1959  | 21 | 40.79% | 3.0103<br>75 | 14 | 26.49% | 2.009<br>166 | Rnf135       |
| 101197                       | 2776  | 21 | 28.53% | 2.1243<br>96 | 8  | 14.12% | 0.810<br>201 | Zfp956       |
| 72621                        | 1015  | 21 | 62.76% | 5.8101<br>72 | 38 | 80%    | 10.52<br>543 | Pdzd11       |
| 240041                       | 6618  | 21 | 8.92%  | 0.8911<br>04 | 24 | 8.48%  | 1.019<br>545 | Zfp945       |
| 21942                        | 2134  | 21 | 30.79% | 2.7635<br>07 | 25 | 36.79% | 3.293<br>576 | Tnfrsf9      |
| 68198                        | 455   | 21 | 69.89% | 12.961<br>15 | 29 | 83.52% | 17.91<br>879 | Ndufb2       |
| gi 110625689 ref NM_023042.2 | 2865  | 21 | 32.60% | 2.0584<br>03 | 15 | 23.18% | 1.471<br>935 | -            |
| 68789                        | 2622  | 21 | 24.18% | 2.2491<br>7  | 11 | 14.65% | 1.179<br>457 | Trmt61b      |
| 218232                       | 4329  | 21 | 19.27% | 1.3622<br>83 | 5  | 5.52%  | 0.324<br>717 | Ptpdc1       |
| 64010                        | 2524  | 21 | 8.84%  | 2.3364<br>99 | 12 | 10.50% | 1.336<br>639 | Sav1         |
| 105844                       | 4748  | 21 | 18.24% | 1.2420<br>65 | 10 | 9.69%  | 0.592<br>122 | Card10       |

|                                     |      |    |        |              |    |        |              |                   |
|-------------------------------------|------|----|--------|--------------|----|--------|--------------|-------------------|
| 68980                               | 1409 | 21 | 43.15% | 4.1854<br>68 | 18 | 39.39% | 3.591<br>564 | Wdr53             |
| 76832                               | 1643 | 21 | 48.63% | 3.5893<br>63 | 41 | 60.01% | 7.015<br>658 | Hyls1             |
| gi 118131165 ref N<br>M_016765.2    | 1254 | 21 | 56.06% | 4.7028<br>1  | 30 | 66.19% | 6.725<br>829 | -                 |
| 94064                               | 828  | 21 | 57.13% | 7.1223<br>72 | 22 | 52.78% | 7.469<br>894 | Mrpl27            |
| 70796                               | 2054 | 21 | 40.12% | 2.8711<br>41 | 18 | 27.56% | 2.463<br>736 | Zdhhc1            |
| 98402                               | 3673 | 21 | 25.48% | 1.6055<br>88 | 32 | 35.42% | 2.449<br>352 | Sh3bp4            |
| 18604                               | 2279 | 21 | 35.81% | 2.5876<br>81 | 16 | 28.35% | 1.973<br>776 | Pdk2              |
| 106042                              | 4085 | 21 | 21.03% | 1.4436<br>53 | 15 | 16.06% | 1.032<br>337 | Prickle1          |
| 101351                              | 3205 | 21 | 26.77% | 1.8400<br>39 | 18 | 22%    | 1.578<br>943 | Eogt              |
| 233058                              | 3334 | 21 | 23.04% | 1.7688<br>43 | 10 | 14.70% | 0.843<br>25  | Zfp420            |
| gi 169259766 ref N<br>M_031162.3    | 1358 | 21 | 32.99% | 4.3426<br>54 | 2  | 7.22%  | 0.414<br>05  | -                 |
| 24051                               | 3727 | 21 | 25.22% | 1.5823<br>25 | 17 | 17.39% | 1.282<br>365 | Sgcb              |
| 22365                               | 2643 | 21 | 27.88% | 2.2312<br>99 | 17 | 27.96% | 1.808<br>314 | Vps45             |
| gi 149268252 ref X<br>M_001473631.1 | 1902 | 21 | 25.29% | 3.1005<br>91 | 13 | 13.77% | 1.921<br>564 | -                 |
| 76563                               | 1970 | 21 | 43.76% | 2.9935<br>66 | 7  | 12.23% | 0.998<br>973 | Qrs11             |
| 83396                               | 3619 | 21 | 21.86% | 1.6295<br>45 | 9  | 10.14% | 0.699<br>159 | Glis2             |
| 29877                               | 5868 | 21 | 14.52% | 1.0049<br>97 | 24 | 12.78% | 1.149<br>855 | Hdgfrp3           |
| 384864                              | 1122 | 21 | 41.71% | 5.2560<br>82 | 18 | 43.76% | 4.510<br>262 | Gm1943            |
| 22700                               | 4079 | 21 | 23.12% | 1.4457<br>77 | 13 | 15.54% | 0.896<br>008 | Zfp40             |
| 319266                              | 3792 | 21 | 23.95% | 1.5552<br>02 | 16 | 20.46% | 1.186<br>243 | A130010<br>J15Rik |
| 58208                               | 7923 | 21 | 12.37% | 0.7443<br>3  | 2  | 1.24%  | 0.070<br>968 | Bcl11b            |
| 66665                               | 1745 | 21 | 44.18% | 3.3795<br>55 | 30 | 53.41% | 4.833<br>347 | 5730528<br>L13Rik |

|                                     |       |    |        |              |    |        |              |         |
|-------------------------------------|-------|----|--------|--------------|----|--------|--------------|---------|
| 76816                               | 2619  | 21 | 31.73% | 2.2517<br>47 | 32 | 34.98% | 3.435<br>078 | Sdccag8 |
| 14680                               | 5616  | 21 | 11%    | 1.0500<br>93 | 11 | 8.01%  | 0.550<br>665 | Gnal    |
| gi 142370490 ref N<br>M_177777.4    | 2230  | 21 | 32.02% | 2.6445<br>4  | 27 | 39.78% | 3.403<br>933 | -       |
| 230752                              | 1363  | 21 | 51.65% | 4.3267<br>24 | 31 | 55.61% | 6.394<br>226 | Fam176b |
| 77832                               | 2886  | 21 | 26.78% | 2.0434<br>25 | 20 | 27.69% | 1.948<br>3   | Tchp    |
| 18441                               | 3886  | 21 | 22.54% | 1.5175<br>82 | 16 | 18.22% | 1.157<br>549 | P2ry1   |
| 142980                              | 4327  | 21 | 20.71% | 1.3629<br>13 | 9  | 9.11%  | 0.584<br>76  | Tlr3    |
| 665378                              | 1621  | 21 | 23.81% | 3.6380<br>78 | 17 | 16.72% | 2.948<br>411 | Gm7609  |
| 66440                               | 794   | 21 | 42.32% | 7.4273<br>6  | 13 | 40.18% | 4.603<br>042 | Cdc26   |
| 79554                               | 2662  | 21 | 30.05% | 2.2153<br>73 | 22 | 33.58% | 2.323<br>468 | Gltpd1  |
| 17132                               | 3642  | 21 | 13.18% | 1.6192<br>54 | 23 | 11.31% | 1.775<br>456 | Maf     |
| 320662                              | 2534  | 21 | 36.54% | 2.3272<br>79 | 17 | 27.98% | 1.886<br>099 | Casc1   |
| gi 149262588 ref X<br>M_001473299.1 | 3531  | 21 | 7.53%  | 1.6701<br>57 | 18 | 7.17%  | 1.433<br>167 | -       |
| 234854                              | 1661  | 21 | 35.40% | 3.5504<br>66 | 26 | 37.45% | 4.400<br>741 | Cdk10   |
| 56626                               | 2336  | 21 | 33.90% | 2.5245<br>39 | 12 | 17.34% | 1.444<br>211 | Poll    |
| 171543                              | 4654  | 21 | 17.28% | 1.2671<br>52 | 7  | 6.32%  | 0.422<br>857 | Bmf     |
| gi 149274944 ref X<br>R_033433.1    | 3709  | 21 | 9.30%  | 1.5900<br>04 | 38 | 12.40% | 2.880<br>374 | -       |
| gi 22779908 ref N<br>M_152815.1     | 2227  | 21 | 37.81% | 2.6481<br>02 | 16 | 27.57% | 2.019<br>863 | -       |
| 68870                               | 1584  | 21 | 44.95% | 3.7230<br>58 | 29 | 56.44% | 5.147<br>128 | Ak8     |
| 22051                               | 1760  | 21 | 34.60% | 3.3507<br>52 | 15 | 25.11% | 2.396<br>077 | Trip6   |
| 22596                               | 2571  | 21 | 29.64% | 2.2937<br>86 | 16 | 21.43% | 1.749<br>605 | Xrcc5   |
| 20541                               | 18599 | 21 | 4.84%  | 0.3170<br>77 | 46 | 9.33%  | 0.695<br>329 | Slc8a1  |

|                                     |      |    |        |              |    |        |              |         |
|-------------------------------------|------|----|--------|--------------|----|--------|--------------|---------|
| 14635                               | 1506 | 21 | 41.97% | 3.9158<br>86 | 27 | 50.07% | 5.040<br>352 | Galk1   |
| 12236                               | 3669 | 21 | 25.78% | 1.6073<br>38 | 8  | 10.68% | 0.613<br>006 | Bub1b   |
| 117160                              | 3456 | 21 | 25.98% | 1.7064<br>02 | 16 | 17.48% | 1.301<br>573 | Ttyh2   |
| 225994                              | 1637 | 21 | 38.85% | 3.6025<br>19 | 45 | 32.38% | 7.728<br>335 | Nmrk1   |
| gi 149258218 reflX<br>M_001472251.1 | 2115 | 21 | 22.70% | 2.7883<br>33 | 12 | 17.59% | 1.595<br>119 | -       |
| 404710                              | 5676 | 21 | 15.59% | 1.0389<br>93 | 21 | 14.66% | 1.040<br>157 | Iqgap3  |
| 101809                              | 4094 | 21 | 21.13% | 1.4404<br>8  | 14 | 14.80% | 0.961<br>396 | Spred3  |
| 71820                               | 1812 | 21 | 34.38% | 3.2545<br>94 | 15 | 17.05% | 2.327<br>315 | Wdr34   |
| 66184                               | 941  | 21 | 65.04% | 6.2670<br>82 | 21 | 47.29% | 6.274<br>105 | Rps4y2  |
| 1E+08                               | 5143 | 21 | 16.76% | 1.1466<br>7  | 35 | 21.04% | 1.913<br>258 | Gm2353  |
| 380855                              | 2046 | 21 | 31.87% | 2.8823<br>68 | 30 | 41.45% | 4.122<br>282 | Rsl1    |
| 18973                               | 7167 | 21 | 12.88% | 0.8228<br>44 | 23 | 12.96% | 0.902<br>22  | Pole    |
| 68867                               | 3556 | 21 | 19.01% | 1.6584<br>15 | 17 | 20.30% | 1.344<br>031 | Rnf122  |
| 234664                              | 1808 | 21 | 10.40% | 3.2617<br>94 | 18 | 9.62%  | 2.798<br>957 | Nae1    |
| 381560                              | 4238 | 21 | 20.20% | 1.3915<br>35 | 11 | 11.11% | 0.729<br>716 | Xkr8    |
| 67279                               | 1179 | 21 | 30.70% | 5.0019<br>71 | 8  | 19.17% | 1.907<br>648 | Med31   |
| 17117                               | 2575 | 21 | 25.17% | 2.2902<br>23 | 10 | 18.83% | 1.091<br>805 | Amacr   |
| 56078                               | 3465 | 21 | 22.91% | 1.7019<br>69 | 17 | 17.37% | 1.379<br>329 | Car5b   |
| 67708                               | 4420 | 21 | 18.53% | 1.3342<br>36 | 12 | 13.30% | 0.763<br>275 | Pcnx14  |
| 83382                               | 1849 | 21 | 36.72% | 3.1894<br>67 | 31 | 60.57% | 4.713<br>537 | Siglece |
| 68916                               | 2538 | 21 | 31.84% | 2.3236<br>11 | 29 | 40.19% | 3.212<br>392 | Cdkal1  |
| 16987                               | 3192 | 21 | 25.94% | 1.8475<br>33 | 13 | 16.10% | 1.144<br>992 | Lss     |

|                                     |      |    |        |              |    |        |              |                   |
|-------------------------------------|------|----|--------|--------------|----|--------|--------------|-------------------|
| 57431                               | 841  | 21 | 68.73% | 7.0122<br>76 | 19 | 62.90% | 6.351<br>55  | Dnajc4            |
| 74325                               | 1576 | 21 | 16.62% | 3.7419<br>57 | 36 | 17.01% | 6.421<br>972 | Cltb              |
| 14231                               | 898  | 21 | 64.59% | 6.5671<br>76 | 19 | 41.98% | 5.948<br>389 | Fkbp7             |
| 74455                               | 3042 | 20 | 24.42% | 1.8463<br>18 | 18 | 24.95% | 1.663<br>548 | Nsun6             |
| 214932                              | 1925 | 20 | 37.82% | 2.9176<br>62 | 24 | 42.96% | 3.505<br>118 | Cecr5             |
| 69156                               | 2241 | 20 | 27.80% | 2.5062<br>47 | 23 | 29.72% | 2.885<br>414 | Comtd1            |
| 26408                               | 5393 | 20 | 6.01%  | 1.0414<br>42 | 31 | 7.95%  | 1.616<br>045 | Map3k5            |
| 76267                               | 3474 | 20 | 23.58% | 1.6167<br>24 | 9  | 12.69% | 0.728<br>341 | Fads1             |
| gi 149269057 ref X<br>M_001475747.1 | 985  | 20 | 32.89% | 5.7020<br>3  | 17 | 28.02% | 4.852<br>157 | -                 |
| 223665                              | 1836 | 20 | 37.91% | 3.0590<br>95 | 14 | 26.80% | 2.143<br>766 | C030006<br>K11Rik |
| gi 149261488 ref X<br>R_034617.1    | 3277 | 20 | 20.96% | 1.7139<br>15 | 41 | 32.77% | 3.517<br>463 | -                 |
| 17259                               | 1378 | 20 | 59%    | 4.0758<br>34 | 25 | 52.83% | 5.100<br>502 | Mef2b             |
| 71843                               | 1743 | 20 | 44.87% | 3.2223<br>17 | 11 | 23.69% | 1.774<br>261 | R3hcc1            |
| 16570                               | 6849 | 20 | 11.86% | 0.8200<br>47 | 19 | 10.54% | 0.779<br>917 | Kif3c             |
| 22064                               | 4150 | 20 | 15.23% | 1.3533<br>73 | 7  | 6.36%  | 0.474<br>211 | Trpc2             |
| gi 27754059 ref N<br>M_026442.2     | 499  | 20 | 66.33% | 11.255<br>51 | 26 | 84.57% | 14.64<br>856 | -                 |
| 380755                              | 1213 | 20 | 49.96% | 4.6302<br>55 | 17 | 47.32% | 3.940<br>127 | Gm889             |
| 67330                               | 686  | 20 | 52.77% | 8.1873<br>17 | 11 | 51.60% | 4.508<br>07  | 1700047<br>M11Rik |
| 12662                               | 4867 | 20 | 9.84%  | 1.1539<br>96 | 21 | 13.52% | 1.213<br>054 | Chm               |
| 227697                              | 2126 | 20 | 28.17% | 2.6418<br>15 | 17 | 33.91% | 2.248<br>059 | Dolk              |
| 18102                               | 1235 | 20 | 20.73% | 4.5477<br>73 | 25 | 25.51% | 5.691<br>086 | Nme1              |
| 56327                               | 869  | 20 | 75.14% | 6.4631<br>75 | 23 | 62.72% | 7.440<br>981 | Arl2              |

|                                     |      |    |        |              |    |        |              |                   |
|-------------------------------------|------|----|--------|--------------|----|--------|--------------|-------------------|
| 67851                               | 898  | 20 | 69.60% | 6.2544<br>54 | 26 | 75.61% | 8.139<br>901 | 1700021<br>F05Rik |
| 212937                              | 3498 | 20 | 24.10% | 1.6056<br>32 | 3  | 4%     | 0.241<br>115 | Tifab             |
| 17761                               | 3891 | 20 | 19.87% | 1.4434<br>59 | 22 | 17.42% | 1.589<br>584 | Mtap7             |
| 66627                               | 1548 | 20 | 43.28% | 3.6282<br>29 | 14 | 40.89% | 2.542<br>607 | Ogfod2            |
| 17215                               | 2886 | 20 | 16.25% | 1.9461<br>19 | 28 | 21.41% | 2.727<br>62  | Mcm3              |
| 68499                               | 620  | 20 | 70.32% | 9.0588<br>7  | 14 | 63.87% | 6.348<br>315 | Mrpl53            |
| gi 262050628 ref N<br>M_172611.3    | 4103 | 20 | 9.72%  | 1.3688<br>76 | 14 | 9.38%  | 0.959<br>287 | -                 |
| 96979                               | 1969 | 20 | 34.43% | 2.8524<br>63 | 17 | 32.25% | 2.427<br>31  | Ptges2            |
| 71746                               | 2550 | 20 | 30.16% | 2.2025<br>49 | 23 | 33.29% | 2.535<br>769 | Rgl3              |
| 216856                              | 5034 | 20 | 14.98% | 1.1157<br>13 | 11 | 10.71% | 0.614<br>33  | Nlgn2             |
| gi 149258840 ref X<br>M_910524.3    | 2291 | 20 | 31.82% | 2.4515<br>49 | 10 | 21.39% | 1.227<br>148 | -                 |
| gi 149255594 ref X<br>M_001476600.1 | 522  | 20 | 22.41% | 10.759<br>58 | 2  | 18.77% | 1.077<br>163 | -                 |
| 19012                               | 1414 | 20 | 32.18% | 3.9720<br>65 | 21 | 41.23% | 4.175<br>342 | Ppap2a            |
| 319772                              | 2006 | 20 | 41.08% | 2.7998<br>5  | 5  | 9.82%  | 0.700<br>747 | C130050<br>O18Rik |
| 11629                               | 875  | 20 | 53.37% | 6.4188<br>56 | 8  | 27.09% | 2.570<br>42  | Aif1              |
| 22689                               | 3529 | 20 | 25.56% | 1.5915<br>27 | 17 | 20.06% | 1.354<br>314 | Zfp27             |
| gi 146135045 ref N<br>M_025368.3    | 853  | 20 | 66.82% | 6.5844<br>07 | 19 | 69.64% | 6.262<br>196 | -                 |
| 380608                              | 2358 | 20 | 24.72% | 2.3818<br>91 | 14 | 14.76% | 1.669<br>192 | Tagap1            |
| 14958                               | 2304 | 20 | 31.64% | 2.4377<br>17 | 17 | 24.96% | 2.074<br>381 | H1f0              |
| 73212                               | 1481 | 20 | 39.03% | 3.7923<br>7  | 23 | 40.11% | 4.366<br>112 | 3110082<br>I17Rik |
| 319822                              | 3517 | 20 | 20.67% | 1.5969<br>57 | 13 | 11.15% | 1.039<br>186 | Smyd4             |
| 17193                               | 3584 | 20 | 21.51% | 1.5671<br>04 | 16 | 18.08% | 1.255<br>088 | Mbd4              |

|                                     |      |    |        |              |    |        |              |                   |
|-------------------------------------|------|----|--------|--------------|----|--------|--------------|-------------------|
| 20775                               | 2748 | 20 | 28.93% | 2.0438<br>5  | 31 | 35.88% | 3.171<br>517 | Sqle              |
| 97064                               | 4767 | 20 | 17.71% | 1.1782<br>04 | 22 | 19.43% | 1.297<br>477 | Wwtr1             |
| 13445                               | 1283 | 20 | 18.71% | 4.3776<br>3  | 16 | 15.43% | 3.506<br>029 | Cdk2ap1           |
| 246782                              | 1885 | 20 | 20.90% | 2.9795<br>75 | 11 | 14.38% | 1.640<br>603 | Atpaf2            |
| 56043                               | 1729 | 20 | 41.82% | 3.2484<br>09 | 23 | 34.07% | 3.739<br>857 | Akr1e1            |
| 403178                              | 3484 | 20 | 23.48% | 1.6120<br>84 | 19 | 20.78% | 1.533<br>196 | Plcx1             |
| 66202                               | 3361 | 20 | 17.35% | 1.6710<br>8  | 15 | 14.73% | 1.254<br>714 | 1110059<br>G10Rik |
| 66483                               | 525  | 20 | 25.52% | 10.698<br>09 | 27 | 29.14% | 14.45<br>861 | Rpl36al           |
| 108902                              | 2035 | 20 | 38.72% | 2.7599<br>5  | 21 | 40.64% | 2.901<br>196 | B3gnt1            |
| gi 149252894 ref X<br>M_001471935.1 | 2518 | 20 | 5.84%  | 2.2305<br>4  | 28 | 5.84%  | 3.126<br>255 | -                 |
| 217707                              | 1602 | 20 | 43.88% | 3.5059<br>3  | 16 | 29.21% | 2.807<br>887 | Coq6              |
| 17828                               | 1791 | 20 | 38.08% | 3.1359<br>57 | 18 | 40.98% | 2.825<br>524 | Bloc1s5           |
| 110198                              | 1648 | 20 | 42.48% | 3.4080<br>7  | 22 | 43.75% | 3.753<br>078 | Akr7a5            |
| 72469                               | 3031 | 20 | 28.70% | 1.8530<br>19 | 23 | 33.49% | 2.133<br>359 | Plcd3             |
| 109361                              | 3607 | 20 | 21.85% | 1.5571<br>11 | 13 | 14.14% | 1.013<br>256 | D730005<br>E14Rik |
| 227622                              | 997  | 20 | 62.39% | 5.6333<br>99 | 22 | 56.07% | 6.203<br>684 | BC0292<br>14      |
| 50784                               | 1646 | 20 | 45.20% | 3.4122<br>11 | 37 | 57.65% | 6.319<br>664 | Ppap2c            |
| 20401                               | 1913 | 20 | 25.98% | 2.9359<br>64 | 16 | 26.82% | 2.351<br>403 | Sh3bp1            |
| 330450                              | 3397 | 20 | 15.96% | 1.6533<br>7  | 17 | 14.87% | 1.406<br>94  | Far2              |
| gi 253970493 ref N<br>M_181040.3    | 2136 | 20 | 37.31% | 2.6294<br>47 | 13 | 22.47% | 1.711<br>056 | -                 |
| 56504                               | 1983 | 20 | 31.37% | 2.8323<br>24 | 12 | 25.16% | 1.701<br>299 | Srpk3             |
| 67062                               | 3208 | 20 | 27.84% | 1.7507<br>79 | 12 | 17.21% | 1.051<br>645 | Mcart6            |



|                                  |      |    |        |              |    |        |              |                   |
|----------------------------------|------|----|--------|--------------|----|--------|--------------|-------------------|
| 68971                            | 1183 | 20 | 51.73% | 4.7476<br>75 | 23 | 51.39% | 5.465<br>944 | Tamm41            |
| 53858                            | 2104 | 20 | 37.17% | 2.6694<br>39 | 13 | 24.57% | 1.737<br>08  | Rwdd2b            |
| 72355                            | 1070 | 20 | 40.37% | 5.2490<br>65 | 9  | 33.08% | 2.364<br>726 | Cdpf1             |
| 666395                           | 749  | 20 | 11.88% | 7.4986<br>64 | 21 | 9.21%  | 7.882<br>42  | Gm8081            |
| 23845                            | 3820 | 20 | 21.13% | 1.4702<br>88 | 41 | 27.28% | 3.017<br>468 | Clec5a            |
| 76967                            | 5763 | 20 | 13.83% | 0.9745<br>79 | 17 | 9.73%  | 0.829<br>321 | 2700049<br>A03Rik |
| 70118                            | 1134 | 20 | 35.36% | 4.9528<br>21 | 31 | 51.41% | 7.685<br>476 | Srrd              |
| 67015                            | 2477 | 20 | 28.74% | 2.2674<br>6  | 22 | 35.45% | 2.497<br>001 | Ccdc91            |
| 103850                           | 1306 | 20 | 45.10% | 4.3005<br>35 | 14 | 37.14% | 3.013<br>748 | Nt5m              |
| 105841                           | 5299 | 20 | 16.51% | 1.0599<br>17 | 8  | 7.28%  | 0.424<br>442 | Dennd3            |
| 210172                           | 3352 | 20 | 26.37% | 1.6755<br>67 | 14 | 17.87% | 1.174<br>211 | Zfp526            |
| 319583                           | 4081 | 20 | 20.19% | 1.3762<br>56 | 15 | 16.10% | 1.033<br>348 | Lig4              |
| 53871                            | 2461 | 20 | 4.47%  | 2.2822<br>02 | 14 | 1.99%  | 1.599<br>332 | Pkd2l2            |
| 233571                           | 1917 | 20 | 38.13% | 2.9298<br>38 | 46 | 60.93% | 6.746<br>179 | P2ry6             |
| 22598                            | 4314 | 20 | 2.02%  | 1.3019<br>24 | 15 | 1.83%  | 0.977<br>537 | Slc6a18           |
| 110385                           | 3203 | 20 | 22.17% | 1.7535<br>12 | 19 | 21.26% | 1.667<br>703 | Pde4c             |
| 14885                            | 1613 | 20 | 49.41% | 3.4820<br>21 | 25 | 51.46% | 4.357<br>403 | Gtf2h4            |
| 77032                            | 1612 | 20 | 42.56% | 3.4841<br>81 | 18 | 37.22% | 3.139<br>277 | 2610029<br>I01Rik |
| gi 149234293 reflX<br>R_034075.1 | 1621 | 20 | 6.05%  | 3.4648<br>36 | 12 | 6.05%  | 2.081<br>231 | -                 |
| 1E+08                            | 4466 | 20 | 19.26% | 1.2576<br>13 | 14 | 14.58% | 0.881<br>316 | Ppp4r1l-<br>ps    |
| 75894                            | 2334 | 20 | 35.78% | 2.4063<br>84 | 14 | 21.68% | 1.686<br>356 | Adal              |
| 219228                           | 9509 | 20 | 9.20%  | 0.5906<br>51 | 20 | 9.84%  | 0.591<br>313 | Pcdh17            |

|                                     |      |    |        |              |    |        |              |                   |
|-------------------------------------|------|----|--------|--------------|----|--------|--------------|-------------------|
| 224814                              | 5472 | 20 | 14.04% | 1.0264<br>07 | 20 | 14.66% | 1.027<br>557 | Abcc10            |
| 208777                              | 4474 | 20 | 19.36% | 1.2553<br>64 | 15 | 16.43% | 0.942<br>578 | Sned1             |
| 208691                              | 4992 | 20 | 16.79% | 1.1251       | 9  | 6.35%  | 0.506<br>862 | Eif5a2            |
| 74568                               | 1702 | 20 | 41.83% | 3.2999<br>41 | 24 | 51.82% | 3.964<br>367 | Mlk1              |
| 73737                               | 674  | 20 | 58.16% | 8.3330<br>85 | 25 | 78.19% | 10.42<br>803 | 1110008<br>P14Rik |
| 15042                               | 2182 | 20 | 25.85% | 2.5740<br>14 | 32 | 36.71% | 4.123<br>038 | H2-T24            |
| 68487                               | 2614 | 20 | 11.55% | 2.1486<br>23 | 8  | 9.76%  | 0.860<br>412 | Tmem14<br>0       |
| 98366                               | 2259 | 20 | 12.26% | 2.4862<br>77 | 15 | 7.70%  | 1.866<br>797 | Smad1             |
| 83815                               | 1442 | 19 | 49.31% | 3.7001<br>9  | 27 | 59.15% | 5.264<br>057 | Cenpq             |
| 243912                              | 1383 | 19 | 42.73% | 3.8580<br>44 | 15 | 36.51% | 3.049<br>237 | Hspb6             |
| 399566                              | 2075 | 19 | 31.66% | 2.5714<br>09 | 7  | 16.34% | 0.948<br>423 | Btbd6             |
| 74735                               | 1439 | 19 | 45.59% | 3.7079<br>04 | 6  | 20.43% | 1.172<br>229 | Trim14            |
| gi 149245215 ref X<br>M_001471982.1 | 518  | 19 | 18.92% | 10.300<br>53 | 26 | 19.11% | 14.11<br>126 | -                 |
| 12507                               | 2069 | 19 | 35.67% | 2.5788<br>66 | 3  | 5.85%  | 0.407<br>646 | Cd5               |
| 217265                              | 8339 | 19 | 10.68% | 0.6398<br>46 | 10 | 5.88%  | 0.337<br>138 | Abca5             |
| 67158                               | 2810 | 19 | 23.42% | 1.8988<br>16 | 12 | 16.23% | 1.200<br>596 | Sft2d3            |
| gi 149257068 ref X<br>M_001474723.1 | 5504 | 19 | 7.41%  | 0.9694<br>18 | 11 | 2.47%  | 0.561<br>871 | -                 |
| 212679                              | 2882 | 19 | 24.81% | 1.8513<br>79 | 13 | 20.89% | 1.268<br>153 | Mars2             |
| 27007                               | 3262 | 19 | 22.19% | 1.6357<br>06 | 6  | 9.01%  | 0.517<br>118 | Klrl1             |
| 67260                               | 3668 | 19 | 24.05% | 1.4546<br>55 | 13 | 16.09% | 0.996<br>406 | Lass4             |
| 14085                               | 1597 | 19 | 46.34% | 3.3410<br>61 | 7  | 20.66% | 1.232<br>297 | Fah               |
| 230027                              | 2613 | 19 | 25.79% | 2.0419<br>73 | 10 | 14.43% | 1.075<br>927 | Coq3              |

|                                     |       |    |        |              |    |        |              |                   |
|-------------------------------------|-------|----|--------|--------------|----|--------|--------------|-------------------|
| gi 149268446 ref X<br>M_001477026.1 | 4360  | 19 | 1.24%  | 1.2237<br>79 | 37 | 2.41%  | 2.385<br>818 | -                 |
| 218977                              | 4297  | 19 | 17.52% | 1.2417<br>21 | 18 | 14.68% | 1.177<br>685 | Dlgap5            |
| 66082                               | 2018  | 19 | 31.32% | 2.6440<br>41 | 8  | 16.06% | 1.114<br>528 | Abhd6             |
| 171567                              | 2382  | 19 | 21.83% | 2.2399<br>98 | 20 | 19.98% | 2.360<br>535 | Nme7              |
| 98256                               | 2512  | 19 | 28.78% | 2.1240<br>74 | 10 | 16.12% | 1.119<br>187 | Kmo               |
| 74319                               | 1055  | 19 | 47.49% | 5.0575<br>11 | 13 | 39.15% | 3.464<br>28  | Mettl23           |
| 106639                              | 2174  | 19 | 35.97% | 2.4543<br>12 | 20 | 34.04% | 2.586<br>381 | Vmac              |
| 270210                              | 6353  | 19 | 12.32% | 0.8398<br>67 | 24 | 15.41% | 1.062<br>073 | Zfp651            |
| 67607                               | 3833  | 19 | 19.78% | 1.3920<br>36 | 14 | 14.11% | 1.026<br>86  | Zfp788            |
| 67311                               | 1392  | 19 | 53.09% | 3.8330<br>99 | 16 | 42.03% | 3.231<br>49  | Nanp              |
| 215951                              | 2530  | 19 | 29.84% | 2.1089<br>62 | 13 | 22.17% | 1.444<br>591 | Lace1             |
| 73229                               | 4367  | 19 | 18.85% | 1.2218<br>17 | 13 | 13.46% | 0.836<br>917 | 3110052<br>M02Rik |
| 280411                              | 2509  | 19 | 28.14% | 2.1266<br>14 | 15 | 24.83% | 1.680<br>787 | Lix11             |
| 229011                              | 2208  | 19 | 28.44% | 2.4165<br>19 | 8  | 17.44% | 1.018<br>622 | Samd10            |
| 271842                              | 5135  | 19 | 15.38% | 1.0390<br>8  | 24 | 20.06% | 1.313<br>993 | Rpusd2            |
| 56542                               | 6712  | 19 | 12.71% | 0.7949<br>46 | 22 | 14.81% | 0.921<br>495 | Ick               |
| 433931                              | 3657  | 19 | 19.80% | 1.4590<br>3  | 15 | 16.02% | 1.153<br>157 | Pigg              |
| 214642                              | 4898  | 19 | 15.48% | 1.0893<br>58 | 41 | 26.73% | 2.353<br>354 | A430107<br>O13Rik |
| 75079                               | 2985  | 19 | 26.57% | 1.7874<br>96 | 14 | 20.34% | 1.318<br>578 | Zbtb49            |
| 17755                               | 11852 | 19 | 7.84%  | 0.4501<br>92 | 26 | 10.59% | 0.616<br>742 | Mtap1b            |
| 70839                               | 2338  | 19 | 33.28% | 2.2821<br>53 | 25 | 33.19% | 3.006<br>198 | P2ry12            |
| 230979                              | 893   | 19 | 65.73% | 5.9749<br>99 | 15 | 49.16% | 4.722<br>391 | Tnfrsf14          |

|                                 |      |    |        |              |    |        |              |                   |
|---------------------------------|------|----|--------|--------------|----|--------|--------------|-------------------|
| 70484                           | 2276 | 19 | 28.16% | 2.3443<br>21 | 10 | 16.65% | 1.235<br>236 | Slc35d2           |
| 246293                          | 3163 | 19 | 24.47% | 1.6869<br>03 | 16 | 22.38% | 1.422<br>142 | Klhl8             |
| gi 149274237 ref XR_035054.1    | 504  | 19 | 46.23% | 10.586<br>66 | 19 | 46.43% | 10.59<br>852 | -                 |
| 66253                           | 1054 | 19 | 54.17% | 5.0623<br>1  | 24 | 59.58% | 6.401<br>662 | Aig1              |
| 381232                          | 5292 | 19 | 16.52% | 1.0082<br>53 | 17 | 12.41% | 0.903<br>132 | 5830416<br>P10Rik |
| 102747                          | 3000 | 19 | 26.37% | 1.7785<br>58 | 13 | 17.40% | 1.218<br>272 | Lrrc49            |
| gi 149261457 ref XM_001479852.1 | 1014 | 19 | 9.07%  | 5.2620<br>06 | 20 | 6.61%  | 5.545<br>161 | -                 |
| 15201                           | 3039 | 19 | 26.29% | 1.7557<br>34 | 7  | 11.29% | 0.647<br>574 | Hells             |
| 170728                          | 2981 | 19 | 24.76% | 1.7898<br>94 | 11 | 17.51% | 1.037<br>416 | Rtn4ip1           |
| 14000                           | 4584 | 19 | 12.76% | 1.1639<br>78 | 23 | 16.86% | 1.410<br>605 | Drosha            |
| 30056                           | 1035 | 19 | 52.66% | 5.1552<br>41 | 19 | 52.56% | 5.161<br>018 | Timm9             |
| 19075                           | 1533 | 19 | 33.46% | 3.4805<br>44 | 17 | 43.90% | 3.117<br>661 | Prim1             |
| 629945                          | 4813 | 19 | 9.20%  | 1.1085<br>96 | 22 | 11.70% | 1.285<br>076 | Gm1166<br>9       |
| 68259                           | 4090 | 19 | 18.34% | 1.3045<br>66 | 15 | 14.72% | 1.031<br>075 | Ift80             |
| 574428                          | 2801 | 19 | 29.99% | 1.9049<br>18 | 11 | 18.06% | 1.104<br>083 | Zmynd1<br>5       |
| 320253                          | 1754 | 19 | 25.60% | 3.0420<br>04 | 18 | 32.33% | 2.885<br>128 | 3-Mar             |
| 72562                           | 574  | 19 | 74.74% | 9.2956       | 31 | 73.34% | 15.18<br>35  | Pcbd2             |
| 18294                           | 1556 | 19 | 42.99% | 3.4290<br>97 | 12 | 30.40% | 2.168<br>172 | Ogg1              |
| 72050                           | 2324 | 19 | 33.26% | 2.2959<br>01 | 32 | 37.01% | 3.871<br>114 | Kdelc1            |
| 69917                           | 1106 | 19 | 33.27% | 4.8242<br>99 | 18 | 31.19% | 4.575<br>51  | Nabp2             |
| 74107                           | 2761 | 19 | 28.94% | 1.9325<br>15 | 6  | 9.09%  | 0.610<br>952 | Cep55             |
| 21946                           | 681  | 19 | 46.70% | 7.8350<br>58 | 19 | 42%    | 7.843<br>838 | Pglyrp1           |

|        |      |    |        |              |    |        |              |                   |
|--------|------|----|--------|--------------|----|--------|--------------|-------------------|
| 19249  | 8298 | 19 | 10.27% | 0.6430<br>07 | 17 | 8.33%  | 0.575<br>967 | Ptpn13            |
| 72657  | 697  | 19 | 79.20% | 7.6552       | 14 | 67.72% | 5.646<br>995 | 2700094<br>K13Rik |
| 18655  | 1816 | 19 | 5.12%  | 2.9381<br>47 | 18 | 7.82%  | 2.786<br>627 | Pgk1              |
| 1E+08  | 3581 | 19 | 20.13% | 1.4899<br>96 | 9  | 10.95% | 0.706<br>578 | 9130023<br>H24Rik |
| 667232 | 422  | 19 | 66.59% | 12.643<br>78 | 40 | 81.04% | 26.64<br>831 | Gm8528            |
| 212986 | 3824 | 19 | 3.84%  | 1.3953<br>12 | 29 | 12.24% | 2.132<br>074 | Scfd2             |
| 67416  | 3790 | 19 | 21.40% | 1.4078<br>3  | 10 | 11.79% | 0.741<br>793 | Armcx2            |
| 269344 | 1745 | 19 | 45.85% | 3.0576<br>93 | 12 | 28.48% | 1.933<br>339 | Ell3              |
| 1E+08  | 4513 | 19 | 8.09%  | 1.1822<br>9  | 8  | 6.07%  | 0.498<br>364 | Gm2060<br>5       |
| 77652  | 3755 | 19 | 19.52% | 1.4209<br>52 | 12 | 12.94% | 0.898<br>449 | Zfp955a           |
| 72307  | 1232 | 19 | 53.33% | 4.3309<br>04 | 12 | 42.05% | 2.738<br>373 | 2510002<br>D24Rik |
| 381810 | 1458 | 19 | 47.81% | 3.6595<br>85 | 6  | 20.16% | 1.156<br>953 | Lpar5             |
| 66496  | 797  | 19 | 35.13% | 6.6946<br>98 | 28 | 38.52% | 9.876<br>927 | Pdpdf             |
| 74147  | 3010 | 19 | 26.11% | 1.7726<br>49 | 12 | 17.84% | 1.120<br>823 | Ehhadh            |
| 67249  | 2688 | 19 | 25.26% | 1.9849<br>98 | 20 | 30.77% | 2.091<br>813 | Tbc1d19           |
| 72133  | 4300 | 19 | 18.26% | 1.2408<br>54 | 6  | 5.70%  | 0.392<br>288 | Trub1             |
| 232337 | 1114 | 19 | 41.65% | 4.7896<br>54 | 8  | 26.12% | 2.018<br>956 | Zfp637            |
| 246102 | 7280 | 19 | 12.40% | 0.7329<br>22 | 18 | 11.83% | 0.695<br>126 | Rttn              |
| 56409  | 2171 | 19 | 19.99% | 2.4577<br>03 | 19 | 18.38% | 2.460<br>458 | Nudt3             |
| 28077  | 862  | 19 | 26.22% | 6.1898<br>77 | 18 | 26.57% | 5.870<br>666 | Med10             |
| 214505 | 1234 | 19 | 27.15% | 4.3238<br>85 | 22 | 29.74% | 5.012<br>214 | Gnptg             |
| 1E+08  | 1603 | 19 | 31%    | 3.3285<br>55 | 31 | 27.57% | 5.436<br>887 | Gm4549            |

|                                     |       |    |        |              |    |        |              |                   |
|-------------------------------------|-------|----|--------|--------------|----|--------|--------------|-------------------|
| 66929                               | 1599  | 19 | 41.40% | 3.3368<br>82 | 20 | 51.03% | 3.516<br>444 | Asf1b             |
| 12812                               | 2609  | 19 | 27.67% | 2.0451<br>03 | 14 | 23.38% | 1.508<br>607 | Coil              |
| 66257                               | 2103  | 19 | 34.57% | 2.5371<br>73 | 5  | 11.65% | 0.668<br>425 | Nicn1             |
| 71994                               | 2003  | 19 | 17.77% | 2.6638<br>41 | 7  | 10.78% | 0.982<br>515 | Cnn3              |
| gi 149234010 ref X<br>M_001474453.1 | 2633  | 19 | 11.32% | 2.0264<br>62 | 22 | 15.38% | 2.349<br>059 | -                 |
| 234358                              | 2996  | 19 | 24.47% | 1.7809<br>33 | 6  | 8.78%  | 0.563<br>03  | Zfp930            |
| 218772                              | 2789  | 19 | 30.05% | 1.9131<br>14 | 30 | 40.41% | 3.024<br>091 | Rarb              |
| 13982                               | 4319  | 19 | 17.64% | 1.2353<br>96 | 15 | 15.67% | 0.976<br>405 | Esrl              |
| 243813                              | 1690  | 19 | 35.98% | 3.1572<br>04 | 16 | 33.02% | 2.661<br>677 | Leng9             |
| 78252                               | 3368  | 19 | 24.23% | 1.5842<br>26 | 12 | 15.05% | 1.001<br>685 | Nxpe2             |
| 16069                               | 2111  | 19 | 32.26% | 2.5275<br>58 | 7  | 14.26% | 0.932<br>249 | Igj               |
| 78251                               | 3970  | 19 | 21.36% | 1.3439<br>99 | 6  | 7.41%  | 0.424<br>896 | Zfp712            |
| gi 20149747 ref N<br>M_138665.1     | 3093  | 19 | 25.64% | 1.7250<br>81 | 14 | 19.08% | 1.272<br>536 | -                 |
| 228966                              | 3267  | 19 | 22.83% | 1.6332<br>03 | 18 | 20.29% | 1.548<br>979 | Ppp1r3d           |
| 18845                               | 11049 | 19 | 8.32%  | 0.4829<br>1  | 4  | 1.77%  | 0.101<br>779 | Plxna2            |
| 70317                               | 2023  | 19 | 37.86% | 2.6375<br>06 | 19 | 30.85% | 2.640<br>461 | Arl16             |
| 17129                               | 6988  | 19 | 7.86%  | 0.7635<br>48 | 17 | 6.57%  | 0.683<br>94  | Smad5             |
| gi 149269367 ref X<br>M_001479252.1 | 2269  | 19 | 30.59% | 2.3515<br>53 | 21 | 30.94% | 2.601<br>998 | -                 |
| 67290                               | 857   | 19 | 44.34% | 6.2259<br>91 | 11 | 40.61% | 3.608<br>56  | 3110040<br>N11Rik |
| 320554                              | 3512  | 19 | 22.21% | 1.5192<br>69 | 10 | 10.85% | 0.800<br>512 | Tcp1111           |
| 328830                              | 1900  | 19 | 41.68% | 2.8082<br>5  | 25 | 44.89% | 3.699<br>206 | A530064<br>D06Rik |
| 66118                               | 1064  | 19 | 19.55% | 5.0147<br>31 | 20 | 15.70% | 5.284<br>58  | Sarnp             |

|                                  |      |    |        |              |    |        |              |         |
|----------------------------------|------|----|--------|--------------|----|--------|--------------|---------|
| gi 256985206 ref N<br>M_213616.3 | 6284 | 19 | 12%    | 0.8490<br>89 | 11 | 7.80%  | 0.492<br>129 | -       |
| 18710                            | 5004 | 19 | 16.37% | 1.0662<br>82 | 24 | 17.03% | 1.348<br>392 | Pik3r3  |
| 17850                            | 3675 | 19 | 22.64% | 1.4518<br>84 | 15 | 18.97% | 1.147<br>509 | Mut     |
| 57746                            | 4913 | 19 | 15.79% | 1.0860<br>32 | 14 | 12.86% | 0.801<br>131 | Piwil2  |
| 76467                            | 1204 | 19 | 51.50% | 4.4316<br>23 | 16 | 32.31% | 3.736<br>075 | Msrb2   |
| 67724                            | 3393 | 19 | 23.08% | 1.5725<br>54 | 18 | 23.19% | 1.491<br>457 | Pop1    |
| 67636                            | 1623 | 19 | 36.78% | 3.2875<br>38 | 25 | 46.77% | 4.330<br>555 | Lyrm5   |
| 18005                            | 3218 | 19 | 27.50% | 1.6580<br>72 | 13 | 15.66% | 1.135<br>741 | Nek2    |
| 66083                            | 1669 | 19 | 38.95% | 3.1969<br>29 | 15 | 31.10% | 2.526<br>72  | Setd6   |
| 229937                           | 2813 | 19 | 23.60% | 1.8967<br>91 | 13 | 16.03% | 1.299<br>259 | Znhit6  |
| 235459                           | 916  | 18 | 27.51% | 5.5183<br>94 | 22 | 38.97% | 6.752<br>263 | Gtf2a2  |
| 20842                            | 6010 | 18 | 6.87%  | 0.8410<br>73 | 7  | 4.38%  | 0.327<br>451 | Stag1   |
| 54152                            | 1492 | 18 | 47.05% | 3.3879<br>69 | 13 | 35.59% | 2.449<br>608 | Dnalc4  |
| 66264                            | 856  | 18 | 68.46% | 5.9051<br>98 | 12 | 47.78% | 3.941<br>21  | Ccdc28b |
| 77827                            | 7005 | 18 | 10.19% | 0.7216<br>06 | 8  | 5.60%  | 0.321<br>073 | Krba1   |
| gi 94411119 ref X<br>M_984967.1  | 537  | 18 | 43.95% | 9.4131<br>27 | 13 | 35.20% | 6.805<br>988 | -       |
| 11936                            | 773  | 18 | 41.66% | 6.5392<br>62 | 7  | 29.37% | 2.545<br>896 | Fxyd2   |
| 69714                            | 1100 | 18 | 55.09% | 4.5953<br>18 | 25 | 61.73% | 6.389<br>538 | Tift    |
| gi 225637521 ref N<br>M_026999.3 | 1296 | 18 | 41.90% | 3.9003<br>47 | 3  | 11.34% | 0.650<br>786 | -       |
| 11444                            | 5405 | 18 | 15.93% | 0.9352<br>17 | 12 | 8.62%  | 0.624<br>177 | Chrb2   |
| 68815                            | 2563 | 18 | 18.03% | 1.9722<br>39 | 17 | 18.26% | 1.864<br>758 | Btbd10  |
| 65113                            | 1012 | 18 | 13.64% | 4.9949<br>1  | 9  | 11.56% | 2.500<br>254 | Ndfip1  |

|                                     |      |    |        |              |    |        |              |                   |
|-------------------------------------|------|----|--------|--------------|----|--------|--------------|-------------------|
| 217194                              | 2436 | 18 | 25.74% | 2.0750<br>61 | 15 | 20.53% | 1.731<br>156 | Klh11             |
| 16002                               | 4038 | 18 | 17.66% | 1.2518<br>2  | 22 | 21.45% | 1.531<br>717 | Igf2              |
| 381404                              | 2354 | 18 | 30.29% | 2.1473<br>45 | 11 | 22.77% | 1.313<br>737 | Pabpc11           |
| 11799                               | 3416 | 18 | 15.57% | 1.4797<br>57 | 18 | 13.76% | 1.481<br>415 | Birc5             |
| 21877                               | 1389 | 18 | 45.36% | 3.6392       | 9  | 24.19% | 1.821<br>639 | Tk1               |
| 52276                               | 1626 | 18 | 32.72% | 3.1087<br>63 | 19 | 38.31% | 3.285<br>15  | Cdca8             |
| 71448                               | 1868 | 18 | 30.78% | 2.7060<br>22 | 17 | 22.43% | 2.558<br>552 | Tmem80            |
| 432479                              | 695  | 18 | 66.33% | 7.2731<br>65 | 16 | 60.58% | 6.472<br>28  | 4930404<br>N11Rik |
| gi 164664499 ref N<br>M_001113391.1 | 1634 | 18 | 35.56% | 3.0935<br>43 | 4  | 12%    | 0.688<br>224 | -                 |
| gi 149258393 ref X<br>R_032846.1    | 1798 | 18 | 34.54% | 2.8113<br>73 | 9  | 17.96% | 1.407<br>262 | -                 |
| 226409                              | 4174 | 18 | 16.75% | 1.2110<br>32 | 20 | 22.04% | 1.347<br>099 | Zranb3            |
| 654801                              | 2146 | 18 | 30.43% | 2.3554<br>75 | 12 | 22.65% | 1.572<br>076 | Zfp784            |
| 68014                               | 2784 | 18 | 24.78% | 1.8156<br>79 | 8  | 12.54% | 0.807<br>873 | Zwilch            |
| 269585                              | 5446 | 18 | 13.11% | 0.9281<br>77 | 10 | 9%     | 0.516<br>231 | Zscan20           |
| 69071                               | 1333 | 18 | 44.64% | 3.7920<br>85 | 15 | 29.71% | 3.163<br>612 | Tmem97            |
| 67157                               | 2133 | 18 | 30.19% | 2.3698<br>31 | 7  | 16.08% | 0.922<br>634 | 2610301<br>B20Rik |
| 18633                               | 1470 | 18 | 35.37% | 3.4386<br>73 | 19 | 41.09% | 3.633<br>778 | Pex16             |
| 15412                               | 2566 | 18 | 25.49% | 1.9699<br>33 | 15 | 17.38% | 1.643<br>451 | Hoxb4             |
| 229715                              | 5051 | 18 | 14.31% | 1.0007<br>62 | 12 | 11.44% | 0.667<br>922 | Amigo1            |
| 227099                              | 3045 | 18 | 25.98% | 1.6600<br>49 | 5  | 6.21%  | 0.461<br>641 | Pms1              |
| 109731                              | 2428 | 18 | 28.71% | 2.0818<br>98 | 2  | 4.04%  | 0.231<br>581 | Maob              |
| 16647                               | 2071 | 18 | 4.93%  | 2.4407<br>77 | 22 | 5.07%  | 2.986<br>515 | Kpna2             |



|                                 |      |    |        |              |    |        |              |                   |
|---------------------------------|------|----|--------|--------------|----|--------|--------------|-------------------|
| 72565                           | 4428 | 18 | 15.22% | 1.1415<br>65 | 23 | 20.33% | 1.460<br>301 | Uaca              |
| 235956                          | 1409 | 18 | 48.47% | 3.5875<br>44 | 16 | 37.05% | 3.192<br>501 | Zfp825            |
| 71946                           | 4470 | 18 | 17.38% | 1.1308<br>39 | 18 | 18.61% | 1.132<br>106 | Endod1            |
| 380712                          | 1153 | 18 | 44.84% | 4.3840<br>84 | 34 | 65.83% | 8.290<br>328 | Tlcd2             |
| 434377                          | 4732 | 18 | 15.62% | 1.0682<br>27 | 9  | 6.36%  | 0.534<br>712 | Zfp560            |
| 72254                           | 2441 | 18 | 27.53% | 2.0708<br>11 | 10 | 18.03% | 1.151<br>74  | 1700030<br>K09Rik |
| 230757                          | 2855 | 18 | 20.35% | 1.7705<br>25 | 7  | 10.37% | 0.689<br>309 | 5730409<br>E04Rik |
| 51812                           | 1934 | 18 | 24.87% | 2.6136<br>76 | 19 | 25.85% | 2.761<br>972 | Mcrs1             |
| 330361                          | 3375 | 18 | 21.42% | 1.4977<br>33 | 4  | 5.07%  | 0.333<br>203 | AW1460<br>20      |
| 544696                          | 7269 | 18 | 10.59% | 0.6953<br>98 | 18 | 10.13% | 0.696<br>177 | D630037<br>F22Rik |
| 70415                           | 2016 | 18 | 36.06% | 2.5073<br>66 | 14 | 25.84% | 1.952<br>359 | 2610018<br>G03Rik |
| 74019                           | 3521 | 18 | 20.62% | 1.4356<br>29 | 17 | 21.16% | 1.357<br>391 | Traf3ip1          |
| 243574                          | 4708 | 18 | 15.95% | 1.0736<br>72 | 7  | 7.29%  | 0.418<br>007 | Kbtbd8            |
| 17858                           | 2428 | 18 | 26.65% | 2.0818<br>98 | 26 | 35.09% | 3.010<br>557 | Mx2               |
| gi 145966811 ref NM_007803.4    | 3029 | 18 | 21.89% | 1.6688<br>18 | 28 | 34.27% | 2.598<br>848 | -                 |
| 13808                           | 1506 | 18 | 35.66% | 3.3564<br>74 | 11 | 26.69% | 2.053<br>477 | Eno3              |
| 71769                           | 2753 | 18 | 24.26% | 1.8361<br>24 | 10 | 15.44% | 1.021<br>212 | Bbs10             |
| 381062                          | 2513 | 18 | 27.97% | 2.0114<br>8  | 18 | 20.81% | 2.013<br>734 | 2210404<br>J11Rik |
| gi 149249176 ref XM_001478299.1 | 2774 | 18 | 12.83% | 1.8222<br>24 | 24 | 12.62% | 2.432<br>355 | -                 |
| 69702                           | 1451 | 18 | 29.50% | 3.4837       | 14 | 40.32% | 2.712<br>581 | Ndufaf1           |
| 70604                           | 1851 | 18 | 35.49% | 2.7308<br>75 | 18 | 33.23% | 2.733<br>935 | Dnajb14           |
| 66795                           | 1609 | 18 | 40.40% | 3.1416<br>09 | 25 | 52.58% | 4.368<br>236 | Atg10             |

|                                     |      |    |        |              |    |        |              |                   |
|-------------------------------------|------|----|--------|--------------|----|--------|--------------|-------------------|
| 171531                              | 4484 | 18 | 15.86% | 1.1273<br>08 | 7  | 7.34%  | 0.438<br>889 | Mlph              |
| 279766                              | 1821 | 18 | 33.66% | 2.7758<br>65 | 15 | 29.71% | 2.315<br>813 | Rhbdd3            |
| gi 149275044 ref X<br>M_001476673.1 | 448  | 18 | 78.12% | 11.283<br>15 | 9  | 70.76% | 5.647<br>895 | -                 |
| 241638                              | 4219 | 18 | 16.99% | 1.1981<br>16 | 16 | 17.28% | 1.066<br>185 | Prosapip<br>1     |
| 22165                               | 2256 | 18 | 30.23% | 2.2406<br>25 | 3  | 6.52%  | 0.373<br>856 | Txk               |
| 76779                               | 1595 | 18 | 35.11% | 3.1691<br>85 | 13 | 31.16% | 2.291<br>42  | Cluap1            |
| 382019                              | 5651 | 18 | 11.50% | 0.8945<br>05 | 4  | 3.47%  | 0.199<br>002 | Zfp882            |
| 319722                              | 6712 | 18 | 10.12% | 0.7531<br>06 | 16 | 10.47% | 0.670<br>178 | E330033<br>B04Rik |
| 105377                              | 3742 | 18 | 18.81% | 1.3508<br>42 | 21 | 20.39% | 1.577<br>748 | Ankrd32           |
| 78890                               | 3784 | 18 | 18.08% | 1.3358<br>48 | 11 | 12.08% | 0.817<br>266 | 2310079<br>F23Rik |
| 14137                               | 2882 | 18 | 18.42% | 1.7539<br>38 | 14 | 18.88% | 1.365<br>703 | Fdft1             |
| 277973                              | 5222 | 18 | 15.95% | 0.9679<br>91 | 16 | 13.08% | 0.861<br>401 | Slc9a5            |
| 50708                               | 1578 | 18 | 36.88% | 3.2033<br>27 | 16 | 24.52% | 2.850<br>592 | Hist1h1c          |
| 93760                               | 8175 | 18 | 5.82%  | 0.6183<br>3  | 6  | 3.11%  | 0.206<br>341 | Arid1a            |
| 68161                               | 973  | 18 | 32.99% | 5.1951<br>18 | 10 | 30.42% | 2.889<br>411 | A930005<br>H10Rik |
| 12457                               | 3069 | 18 | 10.82% | 1.6470<br>67 | 20 | 12.25% | 1.832<br>126 | Cern4l            |
| 22758                               | 4435 | 18 | 15.02% | 1.1397<br>63 | 9  | 6.83%  | 0.570<br>52  | Zscan12           |
| 382245                              | 1433 | 18 | 6.84%  | 3.5274<br>59 | 11 | 9.35%  | 2.158<br>085 | Tmem29            |
| 71728                               | 4474 | 18 | 10.64% | 1.1298<br>28 | 12 | 8.23%  | 0.754<br>063 | Stk11ip           |
| 78304                               | 518  | 18 | 66.80% | 9.7583<br>96 | 36 | 72.97% | 19.53<br>866 | Lsmd1             |
| 545622                              | 6369 | 18 | 12.14% | 0.7936<br>65 | 5  | 3.85%  | 0.220<br>709 | Ptpn3             |
| 68440                               | 1417 | 18 | 29.36% | 3.5672<br>9  | 19 | 24.98% | 3.769<br>692 | Dusp23            |

|                                     |      |    |        |              |    |        |              |                   |
|-------------------------------------|------|----|--------|--------------|----|--------|--------------|-------------------|
| gi 149268386 ref X<br>M_001472990.1 | 3445 | 18 | 15.67% | 1.4673       | 16 | 12.77% | 1.305<br>728 | -                 |
| 654309                              | 1170 | 18 | 43.59% | 4.3203<br>84 | 16 | 29.23% | 3.844<br>645 | Nrp               |
| 66617                               | 1217 | 18 | 52.51% | 4.1535<br>33 | 16 | 49.79% | 3.696<br>166 | Ntmt1             |
| 67378                               | 2972 | 18 | 21.27% | 1.7008<br>24 | 18 | 25.10% | 1.702<br>73  | Bbs2              |
| 114871                              | 1979 | 18 | 3.18%  | 2.5542<br>44 | 13 | 3.08%  | 1.846<br>799 | Psg28             |
| 619288                              | 2234 | 18 | 31.60% | 2.2626<br>9  | 18 | 24.89% | 2.265<br>226 | Fam71a            |
| 14038                               | 567  | 18 | 63.84% | 8.9150<br>78 | 6  | 37.39% | 2.975<br>023 | Wfdc18            |
| 20660                               | 6938 | 18 | 9.86%  | 0.7285<br>74 | 14 | 7.37%  | 0.567<br>304 | Sor11             |
| 71532                               | 2280 | 18 | 31.23% | 2.2170<br>39 | 16 | 28.33% | 1.972<br>91  | 9030418<br>K01Rik |
| 218194                              | 5682 | 18 | 9.82%  | 0.8896<br>25 | 35 | 17.97% | 1.731<br>765 | Phactr1           |
| 219103                              | 4385 | 18 | 17.40% | 1.1527<br>59 | 8  | 8.73%  | 0.512<br>912 | Cenpj             |
| 14581                               | 2862 | 18 | 27.74% | 1.7661<br>95 | 7  | 11.98% | 0.687<br>623 | Gfi1              |
| 229524                              | 1825 | 18 | 35.18% | 2.7697<br>8  | 23 | 35.12% | 3.543<br>13  | Msto1             |
| 20460                               | 5333 | 18 | 14.04% | 0.9478<br>43 | 8  | 7.13%  | 0.421<br>736 | Stil              |
| 15451                               | 1830 | 18 | 35.85% | 2.7622<br>13 | 36 | 57.60% | 5.530<br>616 | Hpn               |
| 66194                               | 1353 | 18 | 42.35% | 3.7360<br>31 | 26 | 57.13% | 5.402<br>536 | Pycr1             |
| 18642                               | 2894 | 18 | 24.95% | 1.7466<br>65 | 39 | 50.38% | 3.788<br>682 | Pfkm              |
| 380840                              | 1515 | 18 | 32.94% | 3.3365<br>34 | 26 | 36.30% | 4.824<br>839 | Lyrn4             |
| 230259                              | 3604 | 18 | 20.84% | 1.4025<br>66 | 8  | 6.80%  | 0.624<br>061 | E130308<br>A19Rik |
| 20873                               | 3567 | 18 | 21.61% | 1.4171<br>15 | 23 | 23.86% | 1.812<br>787 | Plk4              |
| 71890                               | 1224 | 18 | 45.42% | 4.1297<br>79 | 24 | 48.45% | 5.512<br>542 | Mad2l2            |
| 67596                               | 1694 | 18 | 45.22% | 2.9839<br>72 | 1  | 2.89%  | 0.165<br>962 | Tespa1            |

|                                 |      |    |        |              |    |        |              |         |
|---------------------------------|------|----|--------|--------------|----|--------|--------------|---------|
| 241308                          | 2738 | 18 | 21.73% | 1.8461<br>83 | 15 | 22.97% | 1.540<br>21  | Ralgps1 |
| gi 70608156 ref NM_027533.2     | 4243 | 18 | 14.75% | 1.1913<br>39 | 2  | 2.31%  | 0.132<br>519 | -       |
| 320234                          | 2951 | 18 | 23.82% | 1.7129<br>28 | 13 | 18.64% | 1.238<br>501 | Ccdc66  |
| 14129                           | 2589 | 18 | 27.04% | 1.9524<br>33 | 33 | 31.17% | 3.583<br>472 | Fcgr1   |
| 74043                           | 4086 | 18 | 18.48% | 1.2371<br>14 | 9  | 9.42%  | 0.619<br>25  | Pex26   |
| 269356                          | 3201 | 18 | 23.15% | 1.5791<br>47 | 5  | 7.65%  | 0.439<br>143 | Slc4a11 |
| 72947                           | 1896 | 18 | 33.49% | 2.6660<br>6  | 27 | 46.10% | 4.003<br>571 | Agxt2l2 |
| 241732                          | 3087 | 18 | 20.51% | 1.6374<br>63 | 14 | 18.43% | 1.275<br>01  | Tspyl3  |
| 14055                           | 4211 | 18 | 7.65%  | 1.2003<br>92 | 8  | 5.82%  | 0.534<br>105 | Ezh1    |
| 242083                          | 3962 | 18 | 18.78% | 1.2758<br>33 | 7  | 8.05%  | 0.496<br>713 | Ppm1l   |
| 319618                          | 3311 | 18 | 18.63% | 1.5266<br>84 | 23 | 26.91% | 1.952<br>948 | Dcp1b   |
| 244202                          | 4483 | 18 | 17.49% | 1.1275<br>6  | 11 | 9.64%  | 0.689<br>836 | Nlrp10  |
| 69440                           | 4716 | 18 | 16.79% | 1.0718<br>51 | 15 | 12.17% | 0.894<br>21  | Fam116b |
| 72041                           | 1726 | 18 | 33.84% | 2.9286<br>5  | 15 | 31.58% | 2.443<br>276 | Alkbh4  |
| 13649                           | 5983 | 18 | 13.12% | 0.8448<br>69 | 12 | 8.81%  | 0.563<br>877 | Egfr    |
| 50770                           | 7443 | 18 | 3.96%  | 0.6791<br>41 | 9  | 2.55%  | 0.339<br>951 | Atp11a  |
| 217031                          | 2119 | 18 | 32.28% | 2.3854<br>88 | 26 | 38.41% | 3.449<br>566 | Tada2a  |
| 11568                           | 4049 | 18 | 18.62% | 1.2484<br>19 | 6  | 6.47%  | 0.416<br>606 | Aebp1   |
| 77744                           | 2293 | 18 | 29.87% | 2.2044<br>7  | 17 | 31.01% | 2.084<br>332 | Bora    |
| gi 149257052 ref XM_001472635.1 | 518  | 18 | 56.18% | 9.7583<br>96 | 4  | 34.56% | 2.170<br>963 | -       |
| 12534                           | 2860 | 18 | 18.50% | 1.7674<br>3  | 18 | 25.98% | 1.769<br>41  | Cdk1    |
| 12183                           | 2068 | 18 | 32.25% | 2.4443<br>18 | 4  | 9.48%  | 0.543<br>79  | Bpgm    |

|                                    |      |    |        |              |    |        |              |                   |
|------------------------------------|------|----|--------|--------------|----|--------|--------------|-------------------|
| 98314                              | 3058 | 17 | 18.12% | 1.5611<br>59 | 12 | 11.18% | 1.103<br>23  | D2hgdh            |
| 18725                              | 3464 | 17 | 15.47% | 1.3781<br>83 | 19 | 14.98% | 1.542<br>048 | Pira2             |
| 232879                             | 2167 | 17 | 25.98% | 2.2030<br>57 | 11 | 24.87% | 1.427<br>105 | Zbtb45            |
| gi 83029091 ref X<br>M_357633.3    | 651  | 17 | 49.16% | 7.3333<br>71 | 8  | 35.94% | 3.454<br>865 | -                 |
| 67902                              | 2161 | 17 | 22.95% | 2.2091<br>74 | 13 | 20.92% | 1.691<br>261 | Sumf2             |
| 77634                              | 1413 | 17 | 37.93% | 3.3786<br>44 | 8  | 18.61% | 1.591<br>732 | Snape3            |
| 272396                             | 3194 | 17 | 24.23% | 1.4946<br>85 | 16 | 18.50% | 1.408<br>339 | Tarsl2            |
| gi 85702295 ref N<br>M_001037913.1 | 781  | 17 | 58.13% | 6.1127<br>07 | 15 | 48.40% | 5.399<br>609 | -                 |
| 66341                              | 1305 | 17 | 46.51% | 3.6582<br>56 | 29 | 57.09% | 6.247<br>548 | Eid3              |
| 68463                              | 672  | 17 | 43.30% | 7.1042<br>03 | 17 | 68.45% | 7.112<br>164 | Mrpl14            |
| gi 149264147 ref X<br>R_032589.1   | 2356 | 17 | 19.86% | 2.0263<br>26 | 15 | 18.51% | 1.789<br>938 | -                 |
| gi 149267127 ref X<br>R_033752.1   | 2750 | 17 | 13.16% | 1.7360<br>09 | 32 | 15.27% | 3.271<br>443 | -                 |
| 19296                              | 3074 | 17 | 26.32% | 1.5530<br>33 | 10 | 13.63% | 0.914<br>573 | Pvt1              |
| 320301                             | 3304 | 17 | 20.22% | 1.4449<br>23 | 20 | 26.33% | 1.701<br>814 | E530011<br>L22Rik |
| 272347                             | 3478 | 17 | 21.59% | 1.3726<br>35 | 5  | 7.04%  | 0.404<br>169 | Zfp398            |
| 329727                             | 4997 | 17 | 16.11% | 0.9553<br>78 | 16 | 13.55% | 0.900<br>187 | Dennd2c           |
| 72167                              | 1856 | 17 | 28.07% | 2.5722<br>11 | 11 | 21.93% | 1.666<br>237 | Thumpd<br>2       |
| 94353                              | 923  | 17 | 49.08% | 5.1722<br>91 | 17 | 59.59% | 5.178<br>087 | Hmgn3             |
| 329795                             | 3456 | 17 | 20.28% | 1.3813<br>73 | 15 | 20.34% | 1.220<br>224 | Tmem67            |
| 228012                             | 4050 | 17 | 8.84%  | 1.1787<br>71 | 3  | 3.63%  | 0.208<br>252 | Tlk1              |
| 171429                             | 3329 | 17 | 21.51% | 1.4340<br>72 | 24 | 26.55% | 2.026<br>84  | Slc26a6           |
| 114641                             | 1047 | 17 | 18.05% | 4.5597<br>18 | 12 | 17.10% | 3.222<br>231 | Rpl31             |

|        |       |    |        |              |    |        |              |                   |
|--------|-------|----|--------|--------------|----|--------|--------------|-------------------|
| 69109  | 1243  | 17 | 41.75% | 3.8407<br>28 | 13 | 32.02% | 2.940<br>318 | Fam58b            |
| 68857  | 3145  | 17 | 22.10% | 1.5179<br>73 | 8  | 11.03% | 0.715<br>141 | Dtwd2             |
| 66388  | 1308  | 17 | 47.78% | 3.6498<br>66 | 16 | 37.23% | 3.439<br>017 | Cutc              |
| 14411  | 2563  | 17 | 26.77% | 1.8626<br>7  | 3  | 4.88%  | 0.329<br>075 | Slc6a12           |
| 19363  | 1858  | 17 | 23.36% | 2.5694<br>43 | 41 | 30.84% | 6.203<br>835 | Rad5111           |
| 80890  | 5755  | 17 | 12.34% | 0.8295<br>44 | 20 | 13.88% | 0.977<br>027 | Trim2             |
| 19335  | 4321  | 17 | 16.25% | 1.1048<br>42 | 12 | 13.05% | 0.780<br>763 | Rab23             |
| 22249  | 6374  | 17 | 12.66% | 0.7489<br>84 | 15 | 10.13% | 0.661<br>609 | Unc13b            |
| 246746 | 1885  | 17 | 15.07% | 2.5326<br>39 | 7  | 13.32% | 1.044<br>02  | Cd300lf           |
| 12479  | 1845  | 17 | 34.04% | 2.5875<br>47 | 14 | 30.95% | 2.133<br>309 | Cd1d1             |
| 67228  | 2952  | 17 | 18.63% | 1.6172<br>17 | 16 | 18.46% | 1.523<br>792 | Wdr85             |
| 20878  | 1905  | 17 | 39.63% | 2.5060<br>5  | 15 | 20.79% | 2.213<br>698 | Aurka             |
| 70382  | 1787  | 17 | 26.47% | 2.6715<br>3  | 11 | 18.35% | 1.730<br>574 | Kctd2             |
| 12326  | 12331 | 17 | 6.34%  | 0.3871<br>56 | 15 | 4.37%  | 0.341<br>991 | Camk4             |
| 70567  | 1400  | 17 | 43.21% | 3.4100<br>17 | 10 | 24.57% | 2.008<br>14  | Fra10ac1          |
| 77090  | 1652  | 17 | 32.51% | 2.8898<br>45 | 8  | 17.49% | 1.361<br>451 | Ocel1             |
| 67099  | 2666  | 17 | 24.01% | 1.7907<br>07 | 12 | 18%    | 1.265<br>445 | Mettl21a          |
| 319615 | 2784  | 17 | 17.78% | 1.7148<br>08 | 11 | 12.03% | 1.110<br>825 | Zfp944            |
| 18817  | 2203  | 17 | 29.19% | 2.1670<br>56 | 4  | 8.90%  | 0.510<br>467 | Plk1              |
| 70873  | 2106  | 17 | 32.15% | 2.2668<br>68 | 18 | 28.68% | 2.402<br>903 | 4921517<br>L17Rik |
| 52184  | 2584  | 17 | 23.65% | 1.8475<br>33 | 7  | 13.27% | 0.761<br>601 | Odf2l             |
| 1E+08  | 751   | 17 | 35.95% | 6.3568<br>9  | 11 | 38.08% | 4.117<br>891 | Gm2741            |

|        |      |    |        |              |    |        |              |                   |
|--------|------|----|--------|--------------|----|--------|--------------|-------------------|
| 217198 | 3007 | 17 | 21.72% | 1.5876<br>37 | 18 | 25.17% | 1.682<br>911 | Plekhh3           |
| 224170 | 5771 | 17 | 12.44% | 0.8272<br>44 | 7  | 5.18%  | 0.341<br>012 | Dzip3             |
| 69790  | 871  | 17 | 56.03% | 5.4810<br>84 | 13 | 49.02% | 4.196<br>114 | Med30             |
| 68087  | 1714 | 17 | 35.82% | 2.7853<br>12 | 12 | 25.03% | 1.968<br>306 | Dcakd             |
| 68874  | 1555 | 17 | 34.53% | 3.0701<br>12 | 22 | 27.78% | 3.977<br>539 | Klhdc9            |
| 69291  | 6017 | 17 | 12.27% | 0.7934<br>23 | 7  | 5.70%  | 0.327<br>07  | 1700001<br>L05Rik |
| 232174 | 4751 | 17 | 13.24% | 1.0048<br>46 | 9  | 8.27%  | 0.532<br>574 | Cyp26b1           |
| 67013  | 1866 | 17 | 37.67% | 2.5584<br>27 | 15 | 27.06% | 2.259<br>965 | Oma1              |
| 68046  | 1032 | 17 | 47.48% | 4.6259<br>93 | 4  | 18.99% | 1.089<br>689 | 2700062<br>C07Rik |
| 227522 | 1027 | 17 | 50.73% | 4.6485<br>14 | 16 | 48.69% | 4.379<br>975 | Rpp38             |
| 320479 | 2763 | 17 | 6.95%  | 1.7278<br>41 | 12 | 8.54%  | 1.221<br>019 | C330024<br>D21Rik |
| 216274 | 8006 | 17 | 10%    | 0.5963<br>06 | 9  | 5.35%  | 0.316<br>045 | Cep290            |
| 620078 | 1971 | 17 | 23.39% | 2.4221<br>33 | 16 | 23.49% | 2.282<br>209 | C130026<br>I21Rik |
| 67148  | 1423 | 17 | 32.47% | 3.3549<br>01 | 15 | 28.04% | 2.963<br>524 | Fam103a<br>1      |
| 21422  | 3192 | 17 | 18.98% | 1.4956<br>22 | 11 | 14.60% | 0.968<br>84  | Tfcp2             |
| 12021  | 5448 | 17 | 13.93% | 0.8762<br>89 | 9  | 7.23%  | 0.464<br>438 | Bard1             |
| 78929  | 2514 | 17 | 25.34% | 1.8989<br>75 | 11 | 18.10% | 1.230<br>126 | Polr3h            |
| 14272  | 1881 | 17 | 22.12% | 2.5380<br>25 | 5  | 5.37%  | 0.747<br>314 | Fnta              |
| 631323 | 2702 | 17 | 24.94% | 1.7668<br>48 | 21 | 31.35% | 2.185<br>023 | Gm1225<br>0       |
| 218630 | 1876 | 17 | 37.05% | 2.5447<br>89 | 18 | 35.93% | 2.697<br>502 | Ccno              |
| 56219  | 4129 | 17 | 18.58% | 1.1562<br>18 | 14 | 15.28% | 0.953<br>247 | Extl1             |
| 1E+08  | 3468 | 17 | 19.67% | 1.3765<br>93 | 9  | 12.72% | 0.729<br>601 | Gm1038<br>9       |

|                              |      |    |        |              |    |        |              |               |
|------------------------------|------|----|--------|--------------|----|--------|--------------|---------------|
| 70059                        | 3185 | 17 | 19.28% | 1.4989<br>09 | 5  | 7.63%  | 0.441<br>35  | Degs2         |
| 50788                        | 1901 | 17 | 39.77% | 2.5113<br>23 | 15 | 30.41% | 2.218<br>356 | Fbxl8         |
| 268445                       | 3336 | 17 | 22.54% | 1.4310<br>62 | 10 | 14.36% | 0.842<br>745 | Ankrd13<br>b  |
| 229487                       | 2307 | 17 | 30.86% | 2.0693<br>65 | 16 | 28.22% | 1.949<br>82  | Pet112l       |
| 69716                        | 2267 | 17 | 29.91% | 2.1058<br>78 | 12 | 21.48% | 1.488<br>168 | Trip13        |
| 77945                        | 5238 | 17 | 12.60% | 0.9114<br>21 | 18 | 12.92% | 0.966<br>116 | Rpgrip1       |
| 59001                        | 617  | 17 | 62.56% | 7.7374<br>79 | 23 | 70.99% | 10.48<br>008 | Pole3         |
| 623781                       | 3067 | 17 | 15.06% | 1.5565<br>78 | 10 | 13.07% | 0.916<br>66  | Gm1413<br>7   |
| 626391                       | 2903 | 17 | 25.18% | 1.6445<br>14 | 14 | 21.32% | 1.355<br>823 | Zfp951        |
| 225913                       | 2350 | 17 | 28.89% | 2.0315       | 19 | 28.17% | 2.273<br>044 | Dak           |
| 665433                       | 514  | 17 | 24.71% | 9.2879<br>85 | 16 | 26.07% | 8.751<br>429 | Hist1h2a<br>o |
| 192986                       | 2393 | 17 | 22.98% | 1.9949<br>96 | 18 | 28.88% | 2.114<br>715 | Cyb5d2        |
| 235320                       | 5114 | 17 | 13.53% | 0.9335<br>21 | 83 | 47.09% | 4.562<br>885 | Zbtb16        |
| 65103                        | 2553 | 17 | 18.84% | 1.8699<br>66 | 17 | 21.39% | 1.872<br>062 | Arl6ip6       |
| 11486                        | 1626 | 17 | 36.53% | 2.9360<br>54 | 14 | 28.04% | 2.420<br>637 | Ada           |
| 104110                       | 3414 | 17 | 23.76% | 1.3983<br>67 | 26 | 32.92% | 2.141<br>075 | Adcy4         |
| 216177                       | 2634 | 17 | 25.70% | 1.8124<br>62 | 3  | 5.58%  | 0.320<br>205 | AU0411<br>33  |
| gi 19923858 ref NM_138303.1  | 2107 | 17 | 31.61% | 2.2657<br>92 | 13 | 23.64% | 1.734<br>606 | -             |
| gi 118130971 ref NM_007377.3 | 5264 | 17 | 13.15% | 0.9069<br>2  | 9  | 8.34%  | 0.480<br>672 | -             |
| 21975                        | 3740 | 17 | 15.80% | 1.2764<br>77 | 5  | 6.55%  | 0.375<br>855 | Top3a         |
| 66387                        | 786  | 17 | 70.74% | 6.0738<br>22 | 15 | 71.25% | 5.365<br>261 | Nudt8         |
| gi 149274732 ref XM_918237.2 | 399  | 17 | 40.35% | 11.964<br>97 | 4  | 22.31% | 2.818<br>443 | -             |



|                                     |      |    |        |              |    |        |              |                   |
|-------------------------------------|------|----|--------|--------------|----|--------|--------------|-------------------|
| gi 149275108 ref X<br>R_031047.1    | 424  | 17 | 53.77% | 11.259<br>49 | 8  | 61.79% | 5.304<br>522 | -                 |
| 69399                               | 9789 | 17 | 7.08%  | 0.4876<br>93 | 13 | 6.51%  | 0.373<br>359 | 1700025<br>G04Rik |
| 217648                              | 1491 | 17 | 38.56% | 3.2018<br>94 | 13 | 32.06% | 2.451<br>251 | Gm527             |
| 1E+08                               | 1413 | 17 | 38.71% | 3.3786<br>44 | 13 | 27.32% | 2.586<br>564 | Adat3             |
| 244646                              | 6606 | 17 | 9.69%  | 0.7226<br>8  | 10 | 5.31%  | 0.425<br>582 | Pkd113            |
| 52504                               | 4343 | 17 | 16.90% | 1.0992<br>46 | 16 | 15.40% | 1.035<br>744 | Cenpo             |
| 66637                               | 1147 | 17 | 38.10% | 4.1621<br>83 | 6  | 17%    | 1.470<br>652 | Tsen15            |
| 233913                              | 2605 | 17 | 23.19% | 1.8326<br>39 | 11 | 19.39% | 1.187<br>154 | BC0171<br>58      |
| 210135                              | 3383 | 17 | 20.99% | 1.4111<br>81 | 14 | 12.83% | 1.163<br>451 | Zfp180            |
| 14431                               | 960  | 16 | 51.88% | 4.6804<br>16 | 22 | 67.40% | 6.442<br>784 | Gamt              |
| 240067                              | 3008 | 16 | 25.30% | 1.4937<br>5  | 13 | 18.72% | 1.215<br>032 | Zfp952            |
| 231630                              | 3192 | 16 | 19.49% | 1.4076<br>44 | 5  | 5.86%  | 0.440<br>382 | Ficd              |
| 29807                               | 2562 | 16 | 28.88% | 1.7537<br>86 | 14 | 21.27% | 1.536<br>282 | Tpk1              |
| 66488                               | 1634 | 16 | 34.88% | 2.7498<br>16 | 13 | 26.25% | 2.236<br>729 | Fam136a           |
| 56690                               | 2116 | 16 | 25.71% | 2.1234<br>4  | 14 | 27.65% | 1.860<br>092 | Mlycd             |
| 16765                               | 1070 | 16 | 17.38% | 4.1992<br>52 | 21 | 19.44% | 5.517<br>694 | Stmn1             |
| 68149                               | 3239 | 16 | 20.56% | 1.3872<br>18 | 11 | 16.42% | 0.954<br>781 | Otub2             |
| 71985                               | 3621 | 16 | 17.84% | 1.2408<br>73 | 20 | 20.57% | 1.552<br>829 | Acad10            |
| gi 149263267 ref X<br>M_001475174.1 | 770  | 16 | 13.77% | 5.8353<br>24 | 54 | 14.81% | 19.71<br>629 | -                 |
| 22017                               | 2715 | 16 | 21.44% | 1.6549<br>54 | 12 | 17.97% | 1.242<br>606 | Tpmt              |
| 327766                              | 5123 | 16 | 12.41% | 0.8770<br>64 | 4  | 3.83%  | 0.219<br>512 | Tmem26            |
| 14809                               | 3861 | 16 | 17.69% | 1.1637<br>4  | 3  | 2.54%  | 0.218<br>446 | Grik5             |

|                                     |       |    |        |              |    |        |              |                   |
|-------------------------------------|-------|----|--------|--------------|----|--------|--------------|-------------------|
| 1E+08                               | 2678  | 16 | 16.65% | 1.6778<br>19 | 1  | 1.83%  | 0.104<br>981 | Fam174b           |
| 76566                               | 3533  | 16 | 19.28% | 1.2717<br>8  | 9  | 12.48% | 0.716<br>178 | Fam101b           |
| 109857                              | 1178  | 16 | 49.07% | 3.8142<br>61 | 11 | 40.58% | 2.625<br>243 | Cbr3              |
| 12569                               | 4166  | 16 | 16.71% | 1.0785<br>4  | 18 | 17.02% | 1.214<br>718 | Cdk5r1            |
| 56018                               | 1198  | 16 | 44.41% | 3.7505<br>84 | 5  | 17.28% | 1.173<br>371 | Stard10           |
| 19130                               | 4148  | 16 | 17.50% | 1.0832<br>21 | 14 | 16.08% | 0.948<br>88  | Prox1             |
| 27405                               | 3034  | 16 | 19.97% | 1.4809<br>49 | 27 | 36.09% | 2.501<br>902 | Abcg3             |
| 68948                               | 1014  | 16 | 39.55% | 4.4311<br>63 | 14 | 37.48% | 3.881<br>613 | 1500011<br>H22Rik |
| 12190                               | 10743 | 16 | 6.46%  | 0.4182<br>44 | 21 | 7.95%  | 0.549<br>561 | Brca2             |
| 78755                               | 4334  | 16 | 15.97% | 1.0367<br>33 | 10 | 10.75% | 0.648<br>684 | Fam122b           |
| 16419                               | 3304  | 16 | 20.67% | 1.3599<br>27 | 13 | 14.47% | 1.106<br>179 | Itgb5             |
| 233904                              | 5934  | 16 | 5.56%  | 0.7571<br>96 | 8  | 4.08%  | 0.379<br>022 | Setd1a            |
| 13446                               | 2557  | 16 | 16.27% | 1.7572<br>15 | 23 | 20.61% | 2.528<br>828 | Doc2a             |
| 71446                               | 2483  | 16 | 25.78% | 1.8095<br>85 | 7  | 13.81% | 0.792<br>581 | Wrb               |
| 433091                              | 4483  | 16 | 5.33%  | 1.0022<br>75 | 7  | 2.88%  | 0.438<br>987 | Pnpl1             |
| 233424                              | 4316  | 16 | 15.64% | 1.0410<br>56 | 6  | 6.81%  | 0.390<br>834 | Tmc3              |
| 72735                               | 3137  | 16 | 20.72% | 1.4323<br>24 | 28 | 32.23% | 2.509<br>375 | 2810442<br>I21Rik |
| 13063                               | 3059  | 16 | 10.85% | 1.4688<br>46 | 28 | 15.30% | 2.573<br>361 | Cycs              |
| 78321                               | 1954  | 16 | 31.83% | 2.2994<br>88 | 6  | 13.66% | 0.863<br>274 | Ankrd23           |
| gi 149266895 reflX<br>M_001474179.1 | 5966  | 16 | 10.21% | 0.7531<br>34 | 34 | 16.85% | 1.602<br>204 | -                 |
| 628705                              | 1590  | 16 | 34.72% | 2.8259<br>12 | 13 | 27.36% | 2.298<br>626 | Gm6907            |
| 12263                               | 2644  | 16 | 19.06% | 1.6993<br>95 | 5  | 9.27%  | 0.531<br>656 | C2                |

|        |      |    |        |              |    |        |              |         |
|--------|------|----|--------|--------------|----|--------|--------------|---------|
| 76441  | 6045 | 16 | 11.99% | 0.7432<br>92 | 10 | 7.10%  | 0.465<br>078 | Daam2   |
| 16581  | 3143 | 16 | 21.73% | 1.4295<br>89 | 5  | 6.55%  | 0.447<br>247 | Kifc2   |
| 353242 | 992  | 16 | 41.33% | 4.5294<br>35 | 30 | 50.40% | 8.502<br>208 | Mrpl21  |
| 74246  | 1537 | 16 | 27%    | 2.9233<br>57 | 10 | 23.23% | 1.829<br>145 | Gale    |
| 12235  | 4337 | 16 | 15.73% | 1.0360<br>16 | 13 | 13.33% | 0.842<br>706 | Bub1    |
| 21415  | 2784 | 16 | 25.97% | 1.6139<br>37 | 13 | 21.26% | 1.312<br>793 | Tcf711  |
| 69721  | 4592 | 16 | 11.61% | 0.9784<br>84 | 12 | 12.80% | 0.734<br>686 | Nkiras1 |
| 107993 | 1570 | 16 | 30.51% | 2.8619<br>1  | 8  | 18.54% | 1.432<br>559 | Bfsp2   |
| 72054  | 1702 | 16 | 14.92% | 2.6399<br>53 | 2  | 2.88%  | 0.330<br>364 | Cyp4f18 |
| 50877  | 3341 | 16 | 18.26% | 1.3448<br>67 | 11 | 16.13% | 0.925<br>632 | Neu3    |
| 268395 | 1745 | 16 | 32.15% | 2.5748<br>99 | 17 | 38.80% | 2.738<br>896 | Mpg     |
| 21345  | 1586 | 16 | 40.86% | 2.8330<br>39 | 16 | 34.05% | 2.836<br>213 | Tagln   |
| 55981  | 2193 | 16 | 28.41% | 2.0488<br>83 | 14 | 26.31% | 1.794<br>781 | Pigb    |
| 17532  | 4058 | 16 | 17.94% | 1.1072<br>45 | 5  | 6.04%  | 0.346<br>402 | Mras    |
| 245671 | 4457 | 16 | 16.74% | 1.0081<br>22 | 2  | 2.20%  | 0.126<br>156 | Klf8    |
| 74626  | 1767 | 16 | 37.86% | 2.5428<br>41 | 7  | 18.34% | 1.113<br>739 | Tmem81  |
| 15288  | 1611 | 16 | 32.22% | 2.7890<br>75 | 8  | 21.85% | 1.396<br>1   | Hmbs    |
| 58859  | 1802 | 16 | 30.30% | 2.4934<br>51 | 30 | 37.74% | 4.680<br>461 | Efemp2  |
| 76459  | 3716 | 16 | 17.76% | 1.2091<br>49 | 10 | 13.13% | 0.756<br>565 | Car12   |
| 208628 | 6961 | 16 | 10.46% | 0.6454<br>82 | 23 | 13.69% | 0.928<br>92  | Kntc1   |
| 67425  | 2522 | 16 | 25.10% | 1.7816<br>02 | 15 | 24.43% | 1.672<br>123 | Eps811  |
| 237877 | 7272 | 16 | 8.03%  | 0.6178<br>77 | 10 | 5.42%  | 0.386<br>606 | Atad5   |

|                                  |      |    |        |              |    |        |              |                   |
|----------------------------------|------|----|--------|--------------|----|--------|--------------|-------------------|
| 21940                            | 1576 | 16 | 38.39% | 2.8510<br>15 | 2  | 6.22%  | 0.356<br>776 | Cd27              |
| 77862                            | 976  | 16 | 42.11% | 4.6036<br>88 | 16 | 37.70% | 4.608<br>847 | Thyn1             |
| 56199                            | 4325 | 16 | 13.34% | 1.0388<br>9  | 10 | 9.25%  | 0.650<br>034 | Abcb10            |
| 107227                           | 1284 | 16 | 43.85% | 3.4993<br>76 | 21 | 42.91% | 4.598<br>079 | Macrocl1          |
| 433100                           | 3867 | 16 | 12.90% | 1.1619<br>34 | 11 | 9.59%  | 0.799<br>725 | AA3882<br>35      |
| 69993                            | 3150 | 16 | 19.21% | 1.4264<br>13 | 21 | 30%    | 1.874<br>264 | Chn2              |
| 12815                            | 5605 | 16 | 11.97% | 0.8016<br>41 | 12 | 9.78%  | 0.601<br>905 | Col11a2           |
| 214742                           | 1624 | 16 | 35.59% | 2.7667<br>48 | 16 | 41.19% | 2.769<br>849 | Rcor3             |
| 12044                            | 796  | 16 | 36.06% | 5.6447<br>23 | 45 | 34.55% | 15.89<br>357 | Bcl2a1a           |
| 72140                            | 2567 | 16 | 23.18% | 1.7503<br>7  | 10 | 17.22% | 1.095<br>207 | Ccdc123           |
| 69640                            | 4786 | 16 | 12.91% | 0.9388<br>21 | 15 | 13.60% | 0.881<br>131 | Fam83g            |
| 320664                           | 3731 | 16 | 14.12% | 1.2042<br>88 | 14 | 9.22%  | 1.054<br>933 | Cass4             |
| 64296                            | 1985 | 16 | 37.13% | 2.2635<br>77 | 12 | 21.26% | 1.699<br>585 | Abhd8             |
| 74646                            | 3089 | 16 | 21.40% | 1.4545<br>81 | 9  | 14.28% | 0.819<br>118 | Spsb1             |
| gi 149245344 ref X<br>M_136331.7 | 2394 | 16 | 29.82% | 1.8768<br>59 | 10 | 14.54% | 1.174<br>351 | -                 |
| 229488                           | 4392 | 16 | 15.37% | 1.0230<br>42 | 10 | 11.16% | 0.640<br>118 | Fam160a<br>1      |
| 225638                           | 7250 | 16 | 10.30% | 0.6197<br>52 | 11 | 6.11%  | 0.426<br>557 | Alpk2             |
| 52637                            | 965  | 16 | 57.82% | 4.6561<br>65 | 23 | 58.34% | 6.700<br>738 | Cisd1             |
| 60322                            | 2248 | 16 | 26.42% | 1.9987<br>54 | 10 | 20.60% | 1.250<br>621 | Chst7             |
| 54710                            | 6004 | 16 | 10.56% | 0.7483<br>68 | 10 | 7.33%  | 0.468<br>254 | Hs3st3b1          |
| 73430                            | 5159 | 16 | 14.77% | 0.8709<br>44 | 16 | 13.51% | 0.871<br>92  | 1700049<br>G17Rik |
| 216892                           | 3241 | 16 | 19.07% | 1.3863<br>62 | 9  | 12.62% | 0.780<br>703 | Spns2             |

|                                 |      |    |        |              |    |        |              |              |
|---------------------------------|------|----|--------|--------------|----|--------|--------------|--------------|
| 207375                          | 7709 | 16 | 9.22%  | 0.5828<br>51 | 13 | 7.26%  | 0.474<br>097 | Fam120c      |
| 212980                          | 3354 | 16 | 19.53% | 1.3396<br>54 | 4  | 5.81%  | 0.335<br>289 | Slc45a3      |
| gi 149256746 ref XM_001472661.1 | 3807 | 16 | 13.84% | 1.1802<br>47 | 26 | 18.10% | 1.920<br>05  | -            |
| gi 149234143 ref XM_979163.2    | 2847 | 16 | 10.50% | 1.5782<br>22 | 11 | 10.19% | 1.086<br>244 | -            |
| 17179                           | 1734 | 16 | 37.66% | 2.5912<br>34 | 17 | 40.72% | 2.756<br>271 | Matk         |
| 71991                           | 2107 | 16 | 33.27% | 2.1325<br>1  | 7  | 16.28% | 0.934<br>019 | Ercc8        |
| 218613                          | 5277 | 16 | 10.10% | 0.8514<br>69 | 19 | 8.89%  | 1.012<br>252 | Mier3        |
| 69216                           | 822  | 16 | 42.70% | 5.4661<br>79 | 21 | 44.65% | 7.182<br>4   | Ccdc23       |
| 22256                           | 1934 | 16 | 26.11% | 2.3232<br>68 | 6  | 13.08% | 0.872<br>202 | Ung          |
| 245368                          | 4658 | 16 | 5.20%  | 0.9646<br>2  | 29 | 8.46%  | 1.750<br>333 | Zfp300       |
| 195522                          | 2338 | 16 | 29.34% | 1.9218<br>13 | 7  | 14.67% | 0.841<br>736 | Zfp691       |
| 245695                          | 4063 | 16 | 17.43% | 1.1058<br>82 | 9  | 9.75%  | 0.622<br>756 | Tceanc       |
| 329251                          | 3137 | 16 | 22.79% | 1.4323<br>24 | 5  | 7.81%  | 0.448<br>103 | Ppp1r12<br>b |
| 22390                           | 3419 | 16 | 20.27% | 1.3141<br>85 | 10 | 13.04% | 0.822<br>286 | Wee1         |
| 16404                           | 4035 | 16 | 16.83% | 1.1135<br>56 | 19 | 17.84% | 1.323<br>83  | Itga7        |
| 66965                           | 3066 | 16 | 17.09% | 1.4654<br>92 | 12 | 15.88% | 1.100<br>351 | Ctu2         |
| 382010                          | 1433 | 16 | 40.40% | 3.1355<br>19 | 12 | 35.17% | 2.354<br>275 | BC0889<br>83 |
| 74013                           | 3689 | 16 | 17.78% | 1.2179<br>99 | 6  | 7.97%  | 0.457<br>262 | Rftn2        |
| 23969                           | 4096 | 16 | 16.53% | 1.0969<br>73 | 2  | 2.39%  | 0.137<br>275 | Pacsin1      |
| 69724                           | 2044 | 16 | 14.87% | 2.1982<br>38 | 19 | 22.80% | 2.613<br>333 | Rnaseh2<br>a |
| 71715                           | 3248 | 16 | 20.72% | 1.3833<br>74 | 6  | 8.62%  | 0.519<br>347 | Dhx35        |
| 232536                          | 1067 | 16 | 46.86% | 4.2110<br>58 | 13 | 46.30% | 3.425<br>319 | Mrps35       |

|                                 |      |    |        |              |    |        |              |                   |
|---------------------------------|------|----|--------|--------------|----|--------|--------------|-------------------|
| 12649                           | 3397 | 16 | 19.13% | 1.3226<br>96 | 9  | 11.36% | 0.744<br>85  | Chek1             |
| 21390                           | 1985 | 16 | 31.34% | 2.2635<br>77 | 12 | 23.88% | 1.699<br>585 | Tbxa2r            |
| 101883                          | 1192 | 16 | 48.24% | 3.7694<br>63 | 19 | 41.19% | 4.481<br>253 | Tmem14<br>9       |
| 270160                          | 2971 | 16 | 23.93% | 1.5123<br>53 | 7  | 10.16% | 0.662<br>396 | Rab39             |
| 103140                          | 1873 | 16 | 26.53% | 2.3989<br>32 | 23 | 41.11% | 3.452<br>329 | Gstt3             |
| 70209                           | 2184 | 16 | 27.24% | 2.0573<br>26 | 15 | 27.98% | 1.930<br>904 | Tmem14<br>3       |
| 22643                           | 2731 | 16 | 25.19% | 1.6452<br>58 | 11 | 16.18% | 1.132<br>382 | Zfp101            |
| 20713                           | 3133 | 16 | 23.91% | 1.4341<br>52 | 15 | 21.32% | 1.346<br>025 | Serpini1          |
| 238330                          | 4112 | 16 | 11.19% | 1.0927<br>04 | 18 | 11.77% | 1.230<br>67  | Irf2bpl           |
| 171167                          | 3136 | 16 | 12.50% | 1.4327<br>8  | 12 | 9.69%  | 1.075<br>79  | Fut10             |
| gi 119360369 ref NM_019465.2    | 1876 | 16 | 37.79% | 2.3950<br>96 | 22 | 42.16% | 3.296<br>947 | -                 |
| 72016                           | 2179 | 16 | 23.36% | 2.0620<br>47 | 15 | 26.62% | 1.935<br>335 | 1600002<br>H07Rik |
| 110391                          | 1394 | 16 | 29.84% | 3.2232<br>42 | 10 | 26.61% | 2.016<br>784 | Qdpr              |
| 1E+08                           | 1499 | 16 | 26.08% | 2.9974<br>65 | 15 | 21.95% | 2.813<br>272 | Gm4706            |
| 51944                           | 3118 | 16 | 21.01% | 1.4410<br>52 | 18 | 18.41% | 1.623        | D2Ertd7<br>50e    |
| 14089                           | 2695 | 16 | 24.94% | 1.6672<br>35 | 28 | 38.40% | 2.920<br>932 | Fap               |
| 109242                          | 5616 | 16 | 10.58% | 0.8000<br>71 | 10 | 6.20%  | 0.500<br>605 | Kif24             |
| gi 149268027 ref XM_001480545.1 | 3173 | 16 | 13.11% | 1.4160<br>73 | 12 | 11.38% | 1.063<br>245 | -                 |
| 338351                          | 6153 | 16 | 11.36% | 0.7302<br>45 | 10 | 7.96%  | 0.456<br>915 | Akap17b           |
| 269514                          | 2479 | 16 | 26.26% | 1.8125<br>05 | 14 | 26.06% | 1.587<br>719 | Fbx14             |
| 69694                           | 1366 | 16 | 37.04% | 3.2893<br>11 | 13 | 30.45% | 2.675<br>56  | Tatdn1            |
| gi 146141196 ref NM_028964.3    | 1622 | 15 | 32.31% | 2.5970<br>25 | 15 | 37.79% | 2.599<br>935 | -                 |

|                                     |      |    |        |              |    |        |              |                   |
|-------------------------------------|------|----|--------|--------------|----|--------|--------------|-------------------|
| gi 149264044 ref X<br>M_001476113.1 | 2911 | 15 | 5.57%  | 1.4470<br>54 | 12 | 8.76%  | 1.158<br>941 | -                 |
| 17305                               | 1834 | 15 | 24.10% | 2.2968<br>24 | 12 | 20.99% | 1.839<br>518 | Mfng              |
| 14659                               | 1957 | 15 | 31.12% | 2.1524<br>65 | 15 | 28.67% | 2.154<br>877 | Glrp1             |
| 98488                               | 3005 | 15 | 20.17% | 1.4017<br>88 | 7  | 10.98% | 0.654<br>901 | Gtf3c3            |
| gi 261823930 ref N<br>M_016691.3    | 3381 | 15 | 7.87%  | 1.2458<br>96 | 5  | 4.29%  | 0.415<br>764 | -                 |
| 1E+08                               | 1162 | 15 | 39.50% | 3.6251<br>07 | 22 | 44.32% | 5.322<br>782 | AK0108<br>78      |
| 231326                              | 3694 | 15 | 18.22% | 1.1403<br>29 | 7  | 9.29%  | 0.532<br>75  | Aasdh             |
| 68628                               | 1866 | 15 | 28.99% | 2.2574<br>35 | 16 | 29.90% | 2.410<br>629 | Fbxw9             |
| 66399                               | 1180 | 15 | 38.81% | 3.5698<br>09 | 10 | 35%    | 2.382<br>54  | Tsfm              |
| 72650                               | 1702 | 15 | 18.33% | 2.4749<br>56 | 16 | 29.96% | 2.642<br>911 | 2810006<br>K23Rik |
| 13340                               | 2490 | 15 | 21.89% | 1.6917<br>17 | 7  | 13.78% | 0.790<br>352 | Slc29a2           |
| 67884                               | 1696 | 15 | 36.32% | 2.4837<br>11 | 17 | 37.74% | 2.818<br>027 | 1810043<br>G02Rik |
| 230796                              | 4175 | 15 | 11.14% | 1.0089<br>52 | 14 | 11.50% | 0.942<br>744 | Wdtd1             |
| 212508                              | 1595 | 15 | 33.73% | 2.6409<br>87 | 12 | 28.03% | 2.115<br>157 | Mtg1              |
| 51795                               | 2456 | 15 | 21.58% | 1.7151<br>36 | 10 | 16.41% | 1.144<br>705 | Srpx              |
| 74616                               | 3247 | 15 | 18.82% | 1.2973<br>13 | 11 | 12.38% | 0.952<br>429 | Scrn3             |
| 16329                               | 1786 | 15 | 30.91% | 2.3585<br>52 | 16 | 29.34% | 2.518<br>608 | Inpp1             |
| 19361                               | 2138 | 15 | 23.76% | 1.9702<br>41 | 10 | 20.81% | 1.314<br>966 | Rad51             |
| 215900                              | 1095 | 15 | 43.01% | 3.8469<br>17 | 15 | 42.65% | 3.851<br>228 | Fam26f            |
| 333193                              | 2612 | 15 | 25.50% | 1.6127<br>01 | 7  | 8.84%  | 0.753<br>437 | BC0537<br>49      |
| 75607                               | 6618 | 15 | 9.91%  | 0.6365<br>03 | 9  | 6.66%  | 0.382<br>33  | Wnk2              |
| 63955                               | 3343 | 15 | 17.92% | 1.2600<br>58 | 5  | 7.33%  | 0.420<br>49  | Cables1           |

|                                 |      |    |        |              |    |        |              |          |
|---------------------------------|------|----|--------|--------------|----|--------|--------------|----------|
| 12009                           | 3589 | 15 | 17.61% | 1.1736<br>9  | 10 | 11.45% | 0.783<br>337 | Azi1     |
| 54124                           | 757  | 15 | 56.94% | 5.5645<br>63 | 11 | 53.76% | 4.085<br>253 | Cks1b    |
| gi 149255586 ref XR_032715.1    | 480  | 15 | 68.33% | 8.7757<br>8  | 10 | 53.75% | 5.857<br>076 | -        |
| 72085                           | 2283 | 15 | 22.56% | 1.8451<br>05 | 6  | 12.88% | 0.738<br>869 | Osgepl1  |
| 209039                          | 4707 | 15 | 12.41% | 0.8949<br>17 | 11 | 9.65%  | 0.657<br>008 | Tenc1    |
| 327959                          | 2621 | 15 | 20.30% | 1.6071<br>63 | 9  | 12.78% | 0.965<br>378 | Xaf1     |
| 380718                          | 2365 | 15 | 27.40% | 1.7811<br>31 | 2  | 4.14%  | 0.237<br>75  | Mks1     |
| 216560                          | 2443 | 15 | 20.38% | 1.7242<br>63 | 13 | 22.27% | 1.496<br>036 | Wdpcp    |
| 246277                          | 2265 | 15 | 24.37% | 1.8597<br>68 | 20 | 35.32% | 2.482<br>469 | Csad     |
| 74187                           | 3425 | 15 | 17.99% | 1.2298<br>9  | 10 | 13.75% | 0.820<br>846 | Katnb1   |
| 67582                           | 1933 | 15 | 28.87% | 2.1791<br>9  | 9  | 20.90% | 1.308<br>979 | Slc25a26 |
| 67538                           | 2711 | 15 | 23.46% | 1.5538<br>08 | 7  | 12.03% | 0.725<br>923 | Zswim3   |
| gi 149255584 ref XM_001476320.1 | 411  | 15 | 80.29% | 10.249<br>09 | 7  | 63.99% | 4.788<br>267 | -        |
| 235505                          | 5883 | 15 | 11.66% | 0.7160<br>25 | 8  | 6.66%  | 0.382<br>308 | Cd109    |
| 75744                           | 3077 | 15 | 21.32% | 1.3689<br>87 | 17 | 22.26% | 1.553<br>258 | Svip     |
| 19328                           | 2010 | 15 | 8.66%  | 2.0957<br>09 | 19 | 12.69% | 2.657<br>539 | Rab12    |
| 20877                           | 1957 | 15 | 30.86% | 2.1524<br>65 | 16 | 32.40% | 2.298<br>536 | Aurkb    |
| 72938                           | 559  | 15 | 60.11% | 7.5355<br>54 | 12 | 51.16% | 6.035<br>198 | Hspb11   |
| 231093                          | 3303 | 15 | 19.04% | 1.2753<br>18 | 14 | 17.71% | 1.191<br>63  | Agbl5    |
| 108797                          | 3416 | 15 | 18.71% | 1.2331<br>31 | 13 | 14.52% | 1.069<br>911 | Mex3b    |
| gi 149255587 ref XM_001476407.1 | 384  | 15 | 86.46% | 10.969<br>73 | 7  | 47.14% | 5.124<br>942 | -        |
| 76130                           | 2608 | 15 | 13.15% | 1.6151<br>74 | 12 | 10.39% | 1.293<br>587 | Las11    |



|                                     |      |    |        |              |    |        |              |        |
|-------------------------------------|------|----|--------|--------------|----|--------|--------------|--------|
| gi 118130336 ref N<br>M_009535.2    | 4537 | 15 | 11.55% | 0.9284<br>49 | 22 | 18.82% | 1.363<br>252 | -      |
| 50786                               | 4234 | 15 | 14.69% | 0.9948<br>92 | 3  | 2.60%  | 0.199<br>201 | Hs6st2 |
| 435684                              | 1564 | 15 | 38.62% | 2.6933<br>34 | 23 | 48.34% | 4.134<br>407 | Shf    |
| 209318                              | 2000 | 15 | 16.40% | 2.1061<br>87 | 10 | 12.90% | 1.405<br>698 | Gps1   |
| 72171                               | 1990 | 15 | 33.07% | 2.1167<br>71 | 10 | 22.46% | 1.412<br>762 | Shq1   |
| 11496                               | 9068 | 15 | 7.57%  | 0.4645<br>32 | 12 | 6.18%  | 0.372<br>042 | Adam22 |
| 110816                              | 3871 | 15 | 11.93% | 1.0881<br>88 | 11 | 10.59% | 0.798<br>899 | Pwp2   |
| gi 149251500 ref X<br>M_001472872.1 | 1209 | 15 | 10.84% | 3.4841<br>81 | 12 | 11.25% | 2.790<br>468 | -      |
| gi 149260441 ref X<br>R_033770.1    | 3095 | 15 | 3.84%  | 1.3610<br>26 | 12 | 2.46%  | 1.090<br>041 | -      |
| 30947                               | 3159 | 15 | 20.80% | 1.3334<br>52 | 4  | 6.20%  | 0.355<br>986 | Adat1  |
| gi 161333861 ref N<br>R_004411.1    | 84   | 15 | 78.57% | 50.147<br>31 | 2  | 63.10% | 6.693<br>801 | -      |
| 20557                               | 1834 | 15 | 32.61% | 2.2968<br>24 | 16 | 25.35% | 2.452<br>691 | Slfn3  |
| 109245                              | 3092 | 15 | 8.02%  | 1.3623<br>46 | 9  | 4.88%  | 0.818<br>324 | Lrrc39 |
| 666468                              | 2192 | 15 | 19.43% | 1.9217<br>04 | 13 | 20.35% | 1.667<br>343 | Atg4a  |
| 71306                               | 6480 | 15 | 10.40% | 0.6500<br>58 | 6  | 4.54%  | 0.260<br>315 | Mfap31 |
| 22648                               | 3916 | 15 | 16.27% | 1.0756<br>83 | 15 | 14.71% | 1.076<br>888 | Zfp11  |
| 16795                               | 3669 | 15 | 18.12% | 1.1480<br>99 | 23 | 22.70% | 1.762<br>391 | Large  |
| 70315                               | 1724 | 15 | 32.02% | 2.4433<br>73 | 8  | 22.74% | 1.304<br>592 | Hdac8  |
| gi 46249420 ref N<br>M_206958.1     | 5501 | 15 | 3.33%  | 0.7657<br>47 | 17 | 2.35%  | 0.868<br>819 | -      |
| 240047                              | 3373 | 15 | 18.97% | 1.2488<br>51 | 10 | 10.38% | 0.833<br>5   | Mmp25  |
| 21676                               | 9962 | 15 | 7.27%  | 0.4228<br>44 | 9  | 4.43%  | 0.253<br>991 | Tead1  |
| 329470                              | 1998 | 15 | 27.73% | 2.1082<br>96 | 4  | 8.66%  | 0.562<br>842 | Accs   |

|                                  |      |    |        |              |    |        |              |                   |
|----------------------------------|------|----|--------|--------------|----|--------|--------------|-------------------|
| 77422                            | 2416 | 15 | 25.91% | 1.7435<br>32 | 3  | 6.08%  | 0.349<br>097 | C330018<br>D20Rik |
| 69871                            | 939  | 15 | 38.34% | 4.4860<br>22 | 8  | 33.97% | 2.395<br>226 | Ppp1r35           |
| 66898                            | 3248 | 15 | 15.73% | 1.2969<br>13 | 17 | 19.12% | 1.471<br>482 | Baiap211          |
| 17063                            | 2969 | 15 | 19.27% | 1.4187<br>86 | 3  | 4.95%  | 0.284<br>075 | Muc13             |
| 67106                            | 660  | 15 | 56.21% | 6.3823<br>86 | 14 | 63.18% | 5.963<br>569 | Zbtb8os           |
| 58222                            | 2581 | 15 | 21.85% | 1.6320<br>71 | 3  | 5.70%  | 0.326<br>78  | Rab37             |
| 17766                            | 939  | 15 | 55.59% | 4.4860<br>22 | 33 | 76.25% | 9.880<br>308 | Nudt1             |
| 72179                            | 3203 | 15 | 18.36% | 1.3151<br>34 | 9  | 12.27% | 0.789<br>965 | Fbxl2             |
| 19719                            | 2141 | 15 | 21.67% | 1.9674<br>8  | 8  | 11.35% | 1.050<br>499 | Rfng              |
| 110074                           | 2358 | 15 | 18.02% | 1.7864<br>18 | 23 | 21.88% | 2.742<br>244 | Dut               |
| 69126                            | 418  | 15 | 28.23% | 10.077<br>45 | 12 | 29.43% | 8.070<br>995 | 1810022<br>K09Rik |
| gi 146135073 reflN<br>M_025693.3 | 1351 | 15 | 36.79% | 3.1179<br>68 | 8  | 25.39% | 1.664<br>78  | -                 |
| 547431                           | 2563 | 15 | 21.07% | 1.6435<br>33 | 16 | 27.62% | 1.755<br>066 | Btl2              |
| 72486                            | 3456 | 15 | 20.05% | 1.2188<br>58 | 17 | 19.76% | 1.382<br>921 | Rnf219            |
| 69692                            | 718  | 15 | 48.89% | 5.8668<br>17 | 4  | 25.63% | 1.566<br>238 | Hdcd2             |
| 64707                            | 4282 | 15 | 15.46% | 0.9837<br>4  | 14 | 14.62% | 0.919<br>186 | Suv39h2           |
| 217716                           | 5448 | 15 | 11.27% | 0.7731<br>96 | 23 | 16.56% | 1.186<br>897 | Mlh3              |
| 77782                            | 8569 | 15 | 8.11%  | 0.4915<br>83 | 6  | 3.43%  | 0.196<br>854 | Polq              |
| 66469                            | 785  | 15 | 64.71% | 5.3660<br>82 | 16 | 56.56% | 5.730<br>235 | 2810405<br>K02Rik |
| 252876                           | 2041 | 15 | 29.20% | 2.0638<br>78 | 13 | 23.37% | 1.790<br>698 | Gin1              |
| 68177                            | 2077 | 15 | 19.31% | 2.0281<br>05 | 12 | 19.60% | 1.624<br>302 | Ebpl              |
| 23992                            | 1554 | 15 | 36.29% | 2.7106<br>66 | 21 | 40.22% | 3.799<br>185 | Prkra             |

|                                     |      |    |        |              |    |        |              |                   |
|-------------------------------------|------|----|--------|--------------|----|--------|--------------|-------------------|
| gi 94410227 ref X<br>M_915705.2     | 831  | 15 | 39.35% | 5.0690<br>43 | 8  | 23.59% | 2.706<br>519 | -                 |
| 54637                               | 1206 | 15 | 47.76% | 3.4928<br>48 | 25 | 40.71% | 5.827<br>937 | Prsf2             |
| 320633                              | 5290 | 15 | 13.89% | 0.7962<br>9  | 8  | 7.41%  | 0.425<br>164 | Zbtb26            |
| 211484                              | 3400 | 15 | 21%    | 1.2389<br>34 | 16 | 19.15% | 1.323<br>01  | Tsga10            |
| gi 149256964 ref X<br>M_001479260.1 | 434  | 15 | 58.06% | 9.7059<br>32 | 5  | 44.70% | 3.238<br>936 | -                 |
| gi 149270184 ref X<br>M_001472384.1 | 2989 | 15 | 20.58% | 1.4092<br>92 | 17 | 20.14% | 1.598<br>988 | -                 |
| 217721                              | 3435 | 15 | 18.66% | 1.2263<br>1  | 19 | 22.59% | 1.555<br>067 | Mfsd7c            |
| 66701                               | 1570 | 15 | 33.57% | 2.6830<br>41 | 13 | 31.46% | 2.327<br>908 | Spryd4            |
| 319493                              | 2970 | 15 | 18.62% | 1.4183<br>08 | 2  | 3.30%  | 0.189<br>32  | A430078<br>G23Rik |
| 76969                               | 2682 | 15 | 25.58% | 1.5706<br>09 | 5  | 9.13%  | 0.524<br>123 | Chst1             |
| 229841                              | 7813 | 15 | 9.24%  | 0.5391<br>49 | 24 | 13.95% | 0.863<br>606 | Cenpe             |
| 623169                              | 1356 | 15 | 36.14% | 3.1064<br>71 | 22 | 49.71% | 4.561<br>263 | Gm6402            |
| 78185                               | 3456 | 15 | 18.46% | 1.2188<br>58 | 12 | 15.57% | 0.976<br>179 | 4930524<br>L23Rik |
| 66361                               | 1646 | 15 | 38.21% | 2.5591<br>58 | 16 | 39.98% | 2.732<br>828 | Zfand1            |
| 66377                               | 414  | 15 | 73.19% | 10.174<br>82 | 28 | 91.55% | 19.01<br>428 | Ndufc1            |
| 70310                               | 2974 | 15 | 8.34%  | 1.4164       | 12 | 10.93% | 1.134<br>39  | Plscr3            |
| 67994                               | 1043 | 15 | 40.56% | 4.0387<br>1  | 34 | 66.16% | 9.164<br>668 | Mrps11            |
| 654788                              | 5504 | 15 | 13.35% | 0.7653<br>3  | 6  | 5.34%  | 0.306<br>475 | 4732440<br>D04Rik |
| 57895                               | 2271 | 15 | 26.38% | 1.8548<br>54 | 10 | 19.90% | 1.237<br>955 | Ccdc126           |
| 140742                              | 3182 | 15 | 8.01%  | 1.3238<br>13 | 3  | 1.54%  | 0.265<br>059 | Sesn1             |
| 27273                               | 3453 | 14 | 18.51% | 1.1385<br>89 | -  | -      | -            | Pdk4              |
| 1E+08                               | 3428 | 14 | 15.61% | 1.1468<br>93 | 16 | 15.93% | 1.312<br>204 | 9330020<br>H09Rik |

|                              |      |    |        |              |    |        |              |                   |
|------------------------------|------|----|--------|--------------|----|--------|--------------|-------------------|
| 67723                        | 4135 | 14 | 11.97% | 0.9507<br>98 | 11 | 11.66% | 0.747<br>893 | 4932415<br>G12Rik |
| 75750                        | 2124 | 14 | 15.68% | 1.8510<br>12 | 5  | 11.53% | 0.661<br>817 | Slc10a6           |
| 73680                        | 2229 | 14 | 20.23% | 1.7638<br>18 | 8  | 12.29% | 1.009<br>025 | Zbtb8a            |
| 240641                       | 5563 | 14 | 11.18% | 0.7067<br>32 | 9  | 7.15%  | 0.454<br>837 | Kif20b            |
| 76508                        | 1840 | 14 | 32.01% | 2.1367<br>12 | 6  | 14.35% | 0.916<br>76  | 2210015<br>D19Rik |
| 246735                       | 711  | 14 | 28.69% | 5.5296<br>05 | 13 | 21.80% | 5.140<br>388 | AY0748<br>87      |
| gi 146149114 ref NM_144917.4 | 2159 | 14 | 17.88% | 1.8210<br>05 | 14 | 19.64% | 1.823<br>046 | -                 |
| 74895                        | 1938 | 14 | 28.64% | 2.0286<br>63 | 8  | 16.82% | 1.160<br>535 | 4930455<br>F23Rik |
| 56176                        | 942  | 14 | 32.80% | 4.1736<br>19 | 8  | 23.04% | 2.387<br>598 | Pigp              |
| 14339                        | 2165 | 14 | 23.14% | 1.8159<br>58 | 12 | 19.95% | 1.558<br>28  | Aktip             |
| 76781                        | 2150 | 14 | 25.02% | 1.8286<br>28 | 3  | 6.84%  | 0.392<br>288 | Mettl4            |
| 108958                       | 3584 | 14 | 14.40% | 1.0969<br>73 | 10 | 11.61% | 0.784<br>43  | Fam73b            |
| 71720                        | 6779 | 14 | 8.44%  | 0.5799<br>6  | 9  | 6.09%  | 0.373<br>249 | Osbp13            |
| 68618                        | 1057 | 14 | 33.87% | 3.7195<br>36 | 26 | 59.04% | 6.915<br>451 | 1110012<br>L19Rik |
| 17300                        | 3990 | 14 | 13.36% | 0.9853<br>51 | 11 | 11.23% | 0.775<br>072 | Foxc1             |
| 100515                       | 6882 | 14 | 9.02%  | 0.5712<br>8  | 12 | 7.92%  | 0.490<br>217 | Zfp518b           |
| 16400                        | 4870 | 14 | 12.16% | 0.8073       | 4  | 3.43%  | 0.230<br>916 | Itga3             |
| 75219                        | 4632 | 14 | 14.51% | 0.8487<br>8  | 5  | 5.29%  | 0.303<br>475 | Dusp18            |
| 212919                       | 4266 | 14 | 13.60% | 0.9216<br>01 | 13 | 13.43% | 0.856<br>731 | Kctd7             |
| 70727                        | 3236 | 14 | 18.42% | 1.2149<br>41 | 15 | 18.70% | 1.303<br>181 | Rasgef1a          |
| 73852                        | 3574 | 14 | 17.07% | 1.1000<br>42 | 3  | 4.11%  | 0.235<br>987 | D3Ertd7<br>51e    |
| 16779                        | 5624 | 14 | 10.88% | 0.6990<br>66 | 13 | 10.62% | 0.649<br>861 | Lamb2             |

|                                     |      |    |        |              |    |        |              |                   |
|-------------------------------------|------|----|--------|--------------|----|--------|--------------|-------------------|
| 234814                              | 2444 | 14 | 25.53% | 1.6086<br>54 | 8  | 11.05% | 0.920<br>261 | Mthfsd            |
| 72775                               | 2016 | 14 | 24.16% | 1.9501<br>73 | 19 | 29.17% | 2.649<br>63  | Fance             |
| 381845                              | 3257 | 14 | 9.82%  | 1.2071<br>08 | 11 | 7.52%  | 0.949<br>505 | 2310014<br>L17Rik |
| 212377                              | 4482 | 14 | 14.86% | 0.8771<br>86 | 6  | 6.56%  | 0.376<br>358 | Mms221            |
| 69185                               | 1360 | 14 | 37.50% | 2.8908<br>45 | 11 | 29.49% | 2.273<br>924 | Dtwd1             |
| 114643                              | 2286 | 14 | 22.75% | 1.7198<br>38 | 5  | 10.72% | 0.614<br>916 | Oas1c             |
| 108147                              | 2611 | 14 | 7.39%  | 1.5057<br>64 | 13 | 8.35%  | 1.399<br>776 | Atic              |
| 27494                               | 6381 | 14 | 9.54%  | 0.6161<br>34 | 17 | 13.05% | 0.749<br>001 | Amot              |
| 68337                               | 1454 | 14 | 29.37% | 2.7039<br>54 | 4  | 10.73% | 0.773<br>424 | Crip2             |
| gi 149262572 ref X<br>M_001480574.1 | 637  | 14 | 32.65% | 6.1719<br>77 | 10 | 26.84% | 4.413<br>495 | -                 |
| 12297                               | 2837 | 14 | 20.09% | 1.3858<br>12 | 10 | 16.85% | 0.990<br>975 | Cacnb3            |
| 71699                               | 2272 | 14 | 27.20% | 1.7304<br>36 | 25 | 35.39% | 3.093<br>526 | Slc41a3           |
| 67836                               | 1238 | 14 | 37.80% | 3.1757<br>27 | 23 | 50.65% | 5.223<br>112 | Wdr83             |
| 245536                              | 747  | 14 | 51.94% | 5.2631<br>18 | 18 | 64.52% | 6.774<br>45  | Gm614             |
| 20475                               | 2853 | 14 | 17.21% | 1.3780<br>4  | 4  | 6.87%  | 0.394<br>167 | Six5              |
| 73736                               | 748  | 14 | 25.67% | 5.2560<br>82 | 28 | 25.94% | 10.52<br>394 | Fcf1              |
| 12455                               | 2175 | 14 | 10.71% | 1.8076<br>09 | 15 | 11.82% | 1.938<br>894 | Ccnt1             |
| 216991                              | 1611 | 14 | 29.11% | 2.4404<br>4  | 8  | 21.66% | 1.396<br>1   | Adap2             |
| 223970                              | 3739 | 14 | 14.15% | 1.0514<br>98 | 20 | 15%    | 1.503<br>823 | Rmi2              |
| 68117                               | 1001 | 14 | 51.25% | 3.9276<br>22 | 13 | 44.96% | 3.651<br>164 | Apool             |
| 433638                              | 1066 | 14 | 37.62% | 3.6881<br>33 | 17 | 56.57% | 4.483<br>466 | I830077J<br>02Rik |
| 68861                               | 3950 | 14 | 7.70%  | 0.9953<br>29 | 9  | 6.43%  | 0.640<br>571 | 1190002<br>N15Rik |

|                                     |       |    |        |              |    |        |              |                |
|-------------------------------------|-------|----|--------|--------------|----|--------|--------------|----------------|
| 108912                              | 3865  | 14 | 15.73% | 1.0172<br>18 | 15 | 17.15% | 1.091<br>098 | Cdca2          |
| 71909                               | 2201  | 14 | 26.17% | 1.7862<br>56 | 16 | 32.99% | 2.043<br>723 | Haus5          |
| 68549                               | 5314  | 14 | 9.92%  | 0.7398<br>47 | 9  | 4.87%  | 0.476<br>149 | Sgol2          |
| 60440                               | 3149  | 14 | 13.31% | 1.2485<br>07 | 28 | 18.83% | 2.499<br>813 | Iigp1          |
| 76843                               | 4202  | 14 | 14.78% | 0.9356<br>38 | 9  | 10.50% | 0.602<br>155 | Dtl            |
| 16948                               | 3604  | 14 | 18.34% | 1.0908<br>85 | 4  | 5.44%  | 0.312<br>031 | Lox            |
| 15267                               | 578   | 14 | 30.10% | 6.8019<br>89 | 12 | 33.91% | 5.836<br>81  | Hist2h2a<br>a1 |
| 108000                              | 11130 | 14 | 5.80%  | 0.3532<br>39 | 12 | 4.17%  | 0.303<br>116 | Cenpf          |
| gi 149269356 reflX<br>M_001478608.1 | 3055  | 14 | 17.71% | 1.2869<br>23 | 4  | 6.42%  | 0.368<br>104 | -              |
| 212728                              | 5060  | 14 | 12.31% | 0.7769<br>86 | 5  | 4.84%  | 0.277<br>806 | Gm1729<br>6    |
| 1E+08                               | 3756  | 14 | 6.26%  | 1.0467<br>38 | 19 | 5.96%  | 1.422<br>165 | Gm4638         |
| 57170                               | 2087  | 14 | 27.60% | 1.8838<br>28 | 15 | 28.89% | 2.020<br>649 | Dolpp1         |
| 407785                              | 587   | 14 | 39.18% | 6.6976<br>99 | 12 | 41.40% | 5.747<br>318 | Ndufs6         |
| 78444                               | 955   | 14 | 53.19% | 4.1168<br>06 | 10 | 25.45% | 2.943<br>871 | Pgpep11        |
| 78373                               | 1336  | 14 | 34.51% | 2.9427<br>77 | 28 | 47.23% | 5.892<br>149 | Nudt17         |
| 67078                               | 1038  | 14 | 31.60% | 3.7876<br>2  | 22 | 51.06% | 5.958<br>644 | Pgp            |
| 226162                              | 1353  | 14 | 38.95% | 2.9058<br>02 | 10 | 31.19% | 2.077<br>898 | Dpcd           |
| 11908                               | 2329  | 14 | 9.15%  | 1.6880<br>85 | 7  | 10.43% | 0.844<br>988 | Atf1           |
| 242109                              | 5170  | 14 | 12.15% | 0.7604<br>54 | 6  | 5.01%  | 0.326<br>274 | Zfp697         |
| 224807                              | 3237  | 14 | 8.68%  | 1.2145<br>66 | 19 | 10.44% | 1.650<br>186 | Tmem63<br>b    |
| 319701                              | 2117  | 14 | 23.15% | 1.8571<br>32 | 7  | 14.17% | 0.929<br>607 | Fbxo48         |
| 231932                              | 1289  | 14 | 42.20% | 3.0500<br>77 | 6  | 20.17% | 1.308<br>641 | Gimap7         |

|                                     |       |    |        |              |    |        |              |                   |
|-------------------------------------|-------|----|--------|--------------|----|--------|--------------|-------------------|
| 237759                              | 5665  | 14 | 11.35% | 0.6940<br>07 | 13 | 9.73%  | 0.645<br>157 | Col23a1           |
| gi 40254348 ref N<br>M_008420.3     | 3733  | 14 | 18.08% | 1.0531<br>88 | 9  | 10.50% | 0.677<br>808 | -                 |
| 14113                               | 1159  | 14 | 13.29% | 3.3921<br>91 | 6  | 9.58%  | 1.455<br>425 | Fbl               |
| gi 119360290 ref N<br>M_178577.4    | 785   | 14 | 45.22% | 5.0083<br>43 | 20 | 61.78% | 7.162<br>794 | -                 |
| 26901                               | 588   | 14 | 57.14% | 6.6863<br>09 | 15 | 61.90% | 7.171<br>93  | Deb1              |
| gi 149254411 ref X<br>M_001479242.1 | 4795  | 14 | 11.57% | 0.8199<br>27 | 8  | 8.18%  | 0.469<br>055 | -                 |
| 73692                               | 10551 | 14 | 6.41%  | 0.3726<br>23 | 5  | 2.32%  | 0.133<br>229 | 2410089<br>E03Rik |
| 12808                               | 5633  | 14 | 11.61% | 0.6979<br>49 | -  | -      | -            | Cobl              |
| gi 94377668 ref X<br>M_987914.1     | 426   | 14 | 45.54% | 9.2289<br>89 | 10 | 63.38% | 6.599<br>523 | -                 |
| 320398                              | 4050  | 14 | 13.88% | 0.9707<br>53 | 8  | 8.69%  | 0.555<br>338 | Lrig3             |
| 320844                              | 2549  | 14 | 25.70% | 1.5423<br>89 | 4  | 7.69%  | 0.441<br>176 | Amigo3            |
| 216846                              | 3950  | 14 | 13.87% | 0.9953<br>29 | 14 | 15.34% | 0.996<br>444 | Cntrob            |
| 666784                              | 4883  | 14 | 8.99%  | 0.8051<br>5  | 9  | 5.73%  | 0.518<br>177 | Gm8286            |
| 11812                               | 515   | 14 | 55.15% | 7.6340<br>77 | 97 | 73.01% | 52.95<br>252 | Apoc1             |
| 66069                               | 1370  | 14 | 40.66% | 2.8697<br>44 | 9  | 18.54% | 1.846<br>903 | Snupn             |
| 208518                              | 2576  | 14 | 24.61% | 1.5262<br>23 | 10 | 17.47% | 1.091<br>381 | Cep78             |
| 66193                               | 1554  | 14 | 12.81% | 2.5299<br>55 | 4  | 7.92%  | 0.723<br>654 | Pithd1            |
| gi 149271914 ref X<br>M_001474328.1 | 1623  | 14 | 26.99% | 2.4223<br>96 | 7  | 14.66% | 1.212<br>556 | -                 |
| 230872                              | 6535  | 14 | 10.31% | 0.6016<br>14 | 4  | 3%     | 0.172<br>082 | Crocc             |
| 22193                               | 1562  | 14 | 14.60% | 2.5169<br>97 | 10 | 12.42% | 1.799<br>87  | Ube2e3            |
| 72083                               | 1010  | 14 | 45.84% | 3.8926<br>23 | 11 | 29.80% | 3.061<br>917 | Mzt2              |
| 12826                               | 6636  | 14 | 7.96%  | 0.5924<br>58 | 4  | 2.95%  | 0.169<br>463 | Col4a1            |

|                                  |      |    |        |              |    |        |              |                   |
|----------------------------------|------|----|--------|--------------|----|--------|--------------|-------------------|
| gi 52345395 ref N<br>M_207530.2  | 3121 | 14 | 19.64% | 1.2597<br>08 | 22 | 26.72% | 1.981<br>76  | -                 |
| 73431                            | 2414 | 14 | 25.97% | 1.6286<br>45 | 6  | 9.86%  | 0.698<br>773 | 1700052<br>K11Rik |
| 225745                           | 1004 | 14 | 49.50% | 3.9158<br>86 | 9  | 27.19% | 2.520<br>176 | Haus1             |
| 12316                            | 9866 | 14 | 6.18%  | 0.3984<br>95 | 14 | 5.82%  | 0.398<br>941 | Aspm              |
| 56419                            | 3516 | 14 | 16.47% | 1.1181<br>88 | 13 | 16.75% | 1.039<br>481 | Diap3             |
| 15558                            | 2971 | 14 | 20.83% | 1.3233<br>08 | 15 | 18.61% | 1.419<br>419 | Htr2a             |
| 30954                            | 782  | 14 | 31.97% | 5.0275<br>57 | 11 | 46.55% | 3.954<br>65  | Siva1             |
| 209003                           | 1743 | 14 | 31.38% | 2.2556<br>22 | 19 | 38.73% | 3.064<br>632 | Rbmx2             |
| 18654                            | 1674 | 14 | 30.05% | 2.3485<br>96 | 14 | 33.33% | 2.351<br>228 | Pgf               |
| 57432                            | 1615 | 14 | 25.08% | 2.4343<br>96 | 9  | 23.78% | 1.566<br>723 | Zc3h8             |
| 108154                           | 4822 | 14 | 12.40% | 0.8153<br>36 | 5  | 5.08%  | 0.291<br>518 | Adamts6           |
| 218138                           | 1510 | 14 | 29.80% | 2.6036<br>75 | 29 | 43.58% | 5.399<br>371 | Gmgs              |
| 54651                            | 3240 | 14 | 18.09% | 1.2134<br>41 | 12 | 15.80% | 1.041<br>258 | Usp27x            |
| 66817                            | 1943 | 14 | 30.42% | 2.0234<br>43 | 5  | 12.04% | 0.723<br>468 | Tmem17<br>0       |
| 109135                           | 5133 | 14 | 13.25% | 0.7659<br>36 | 9  | 7.15%  | 0.492<br>939 | Plekha5           |
| 72310                            | 813  | 14 | 49.32% | 4.8358<br>54 | -  | -      | -            | Nkg7              |
| 107528                           | 3532 | 14 | 19.25% | 1.1131<br>23 | 8  | 11.10% | 0.636<br>783 | Magee1            |
| 243979                           | 2089 | 14 | 29.15% | 1.8820<br>25 | -  | -      | -            | Mrgprb2           |
| 66259                            | 3613 | 14 | 16.80% | 1.0881<br>68 | 16 | 19.43% | 1.245<br>014 | Camk2n<br>1       |
| 66422                            | 648  | 14 | 45.99% | 6.0672<br>06 | 9  | 50.31% | 3.904<br>718 | Dctpp1            |
| 241490                           | 1904 | 14 | 19.80% | 2.0648<br>89 | 10 | 12.82% | 1.476<br>574 | Rbm45             |
| gi 153791561 ref N<br>M_026752.3 | 898  | 14 | 48.78% | 4.3781<br>17 | 9  | 39.76% | 2.817<br>658 | -                 |



|                                |      |    |        |              |    |        |              |                   |
|--------------------------------|------|----|--------|--------------|----|--------|--------------|-------------------|
| 69536                          | 2194 | 14 | 24.61% | 1.7919<br>55 | 14 | 22.20% | 1.793<br>963 | Hemk1             |
| 433904                         | 2201 | 14 | 3.23%  | 1.7862<br>56 | 19 | 6.82%  | 2.426<br>921 | Ociad2            |
| 71643                          | 7064 | 14 | 9.54%  | 0.5565<br>61 | 2  | 0.75%  | 0.079<br>598 | 4930422<br>G04Rik |
| 223648                         | 2414 | 14 | 24.40% | 1.6286<br>45 | 4  | 8.12%  | 0.465<br>849 | Ccdc166           |
| 72397                          | 3313 | 14 | 16.03% | 1.1867<br>04 | 6  | 7.76%  | 0.509<br>157 | Rbm12b<br>1       |
| 55984                          | 3466 | 14 | 17.80% | 1.1343<br>19 | 12 | 11.37% | 0.973<br>363 | Camkk1            |
| 228413                         | 2846 | 14 | 19.01% | 1.3814<br>3  | 6  | 8.12%  | 0.592<br>705 | Prrg4             |
| 15220                          | 2821 | 14 | 19.71% | 1.3936<br>72 | 8  | 12.87% | 0.797<br>277 | Foxq1             |
| 13353                          | 1262 | 14 | 34.55% | 3.1153<br>32 | 23 | 53.41% | 5.123<br>781 | Dgcr6             |
| 104349                         | 1983 | 14 | 29.80% | 1.9826<br>27 | 13 | 26.58% | 1.843<br>074 | Zfp119a           |
| 14257                          | 5853 | 14 | 10.35% | 0.6717<br>15 | 11 | 8.51%  | 0.528<br>368 | Flt4              |
| 434234                         | 2008 | 14 | 24.90% | 1.9579<br>43 | 8  | 16.09% | 1.120<br>078 | 2610020<br>H08Rik |
| 74025                          | 5894 | 14 | 10.84% | 0.6670<br>43 | 8  | 5.92%  | 0.381<br>594 | Nphp3             |
| 68176                          | 1077 | 14 | 50.14% | 3.6504<br>64 | 8  | 33.24% | 2.088<br>317 | 6230427<br>J02Rik |
| 71919                          | 2260 | 14 | 22.70% | 1.7396<br>24 | 9  | 19.51% | 1.119<br>583 | Rpap3             |
| 13434                          | 2637 | 14 | 19.30% | 1.4909<br>18 | 23 | 35.27% | 2.452<br>109 | Trdmt1            |
| 14562                          | 2109 | 14 | 20.63% | 1.8641<br>77 | 12 | 11.85% | 1.599<br>657 | Gdf3              |
| 77579                          | 7783 | 14 | 7.26%  | 0.5051<br>46 | 14 | 7.68%  | 0.505<br>712 | Myh10             |
| 1E+08                          | 126  | 14 | 92.06% | 31.202<br>77 | 8  | 56.35% | 17.85<br>014 | Snord22           |
| 1E+08                          | 962  | 14 | 14.55% | 4.0868<br>5  | 15 | 12.27% | 4.383<br>675 | Rnaset2a          |
| 66706                          | 1092 | 14 | 40.29% | 3.6003<br>2  | 9  | 23.72% | 2.317<br>085 | Ndutfaf3          |
| gi 6678865 ref NM<br>_008590.1 | 2543 | 14 | 22.18% | 1.5460<br>28 | 17 | 25.01% | 1.879<br>424 | -                 |

|                                  |      |    |        |              |    |        |              |                   |
|----------------------------------|------|----|--------|--------------|----|--------|--------------|-------------------|
| 73327                            | 1106 | 13 | 42.31% | 3.3008<br>36 | 10 | 39.15% | 2.541<br>95  | Pracd1            |
| 111173                           | 8760 | 13 | 5.10%  | 0.4167<br>49 | 12 | 3.72%  | 0.385<br>123 | Erc1              |
| 69912                            | 1290 | 13 | 36.98% | 2.8300<br>19 | 9  | 27.36% | 1.961<br>439 | Nup43             |
| 94281                            | 2731 | 13 | 16.29% | 1.3367<br>72 | 11 | 10.51% | 1.132<br>382 | Sfxn4             |
| gi 118129959 ref N<br>M_134469.3 | 1223 | 13 | 23.06% | 2.9850<br>57 | 6  | 19.05% | 1.379<br>262 | -                 |
| 26447                            | 2754 | 13 | 16.30% | 1.3256<br>08 | 7  | 12.45% | 0.714<br>589 | Poli              |
| 71913                            | 2337 | 13 | 19.98% | 1.5621<br>41 | 22 | 26.96% | 2.646<br>586 | Tmem79            |
| 75736                            | 1090 | 13 | 38.99% | 3.3492<br>89 | 9  | 33.30% | 2.321<br>337 | Bcl2112           |
| 75812                            | 2480 | 13 | 20.56% | 1.4720<br>66 | 6  | 11.85% | 0.680<br>177 | Tasp1             |
| 68607                            | 1391 | 13 | 33.21% | 2.6245<br>32 | 15 | 33.72% | 3.031<br>7   | Serhl             |
| 216964                           | 1366 | 13 | 38.51% | 2.6725<br>66 | 7  | 18.30% | 1.440<br>686 | Trp53i13          |
| gi 94411064 ref X<br>M_989772.1  | 458  | 13 | 56.11% | 7.9710<br>14 | 4  | 32.97% | 2.455<br>368 | -                 |
| 74471                            | 2670 | 13 | 19.14% | 1.3673<br>13 | 9  | 13.18% | 0.947<br>662 | 4933440<br>N22Rik |
| gi 164519092 ref N<br>M_009968.2 | 2215 | 13 | 23.02% | 1.6481<br>83 | 16 | 21.17% | 2.030<br>806 | -                 |
| gi 149247736 ref X<br>R_033302.1 | 1962 | 13 | 16.56% | 1.8607<br>16 | 9  | 17.48% | 1.289<br>631 | -                 |
| 17242                            | 1062 | 13 | 31.54% | 3.4375<br>94 | 11 | 31.73% | 2.911<br>993 | Mdk               |
| 219131                           | 1371 | 13 | 28.88% | 2.6628<br>19 | 12 | 38.15% | 2.460<br>741 | Phf11             |
| 73649                            | 5208 | 13 | 7.37%  | 0.7009<br>84 | 6  | 2.98%  | 0.323<br>894 | Cybrd1            |
| 68737                            | 3867 | 13 | 14.87% | 0.9440<br>72 | 7  | 7.78%  | 0.508<br>916 | Angel1            |
| 333789                           | 5731 | 13 | 8.86%  | 0.6370<br>14 | 5  | 3.84%  | 0.245<br>28  | N4bp2             |
| 110877                           | 3118 | 13 | 16.81% | 1.1708<br>55 | 4  | 6.29%  | 0.360<br>667 | Slc18a1           |
| 272538                           | 4409 | 13 | 14.36% | 0.8280<br>16 | 11 | 11.45% | 0.701<br>414 | Tmco7             |

|                                     |      |    |        |              |    |        |              |                   |
|-------------------------------------|------|----|--------|--------------|----|--------|--------------|-------------------|
| 243978                              | 4559 | 13 | 13.97% | 0.8007<br>73 | -  | -      | -            | Mrgprx2           |
| 27204                               | 8797 | 13 | 5.34%  | 0.4149<br>97 | 3  | 1.67%  | 0.095<br>876 | Syn3              |
| 73721                               | 1127 | 13 | 40.20% | 3.2393<br>3  | 20 | 52.88% | 4.989<br>169 | 1110017<br>D15Rik |
| 16975                               | 7296 | 13 | 7.84%  | 0.5003<br>73 | 10 | 6.10%  | 0.385<br>334 | Lrp8              |
| 228788                              | 2158 | 13 | 21.78% | 1.6917<br>17 | 17 | 24.05% | 2.214<br>724 | BC0205<br>35      |
| 1E+08                               | 2090 | 13 | 11.67% | 1.7467<br>58 | 9  | 5.55%  | 1.210<br>649 | Gm2968            |
| 19206                               | 4305 | 13 | 13.87% | 0.8480<br>2  | 8  | 8.20%  | 0.522<br>443 | Ptch1             |
| 66170                               | 1313 | 13 | 25.89% | 2.7804<br>45 | 8  | 17.90% | 1.712<br>961 | Chchd5            |
| 73095                               | 3181 | 13 | 16.85% | 1.1476<br>66 | 8  | 10.81% | 0.707<br>047 | Slc25a42          |
| 229228                              | 1072 | 13 | 40.21% | 3.4055<br>27 | 12 | 33.77% | 3.147<br>086 | Nudt6             |
| 212880                              | 5673 | 13 | 4.83%  | 0.6435<br>26 | 17 | 6.63%  | 0.842<br>477 | Ddx46             |
| gi 161169035 ref N<br>M_183177.2    | 2211 | 13 | 22.89% | 1.6511<br>64 | 6  | 11.08% | 0.762<br>93  | -                 |
| gi 149274727 ref X<br>M_001480336.1 | 671  | 13 | 46.35% | 5.4407<br>22 | 6  | 15.95% | 2.513<br>916 | -                 |
| 75454                               | 583  | 13 | 53.69% | 6.2619<br>63 | 18 | 57.46% | 8.680<br>127 | Phpt1             |
| 233744                              | 6166 | 13 | 9.55%  | 0.5920<br>73 | 10 | 7.17%  | 0.455<br>951 | Spon1             |
| 193736                              | 1835 | 13 | 22.29% | 1.9894<br>96 | 9  | 18.75% | 1.378<br>887 | Zbtb12            |
| 69534                               | 976  | 13 | 54.92% | 3.7404<br>96 | 22 | 68.14% | 6.337<br>165 | Avp1              |
| gi 33468922 ref N<br>M_011283.1     | 6950 | 13 | 8.27%  | 0.5252<br>84 | 15 | 9.01%  | 0.606<br>776 | -                 |
| 224694                              | 2253 | 13 | 20.77% | 1.6203<br>84 | 3  | 6.52%  | 0.374<br>354 | Zfp81             |
| 78796                               | 1924 | 13 | 27.29% | 1.8974<br>66 | 3  | 7.64%  | 0.438<br>367 | Zcchc4            |
| gi 149257924 ref X<br>M_001476227.1 | 1703 | 13 | 26.01% | 2.1437<br>02 | 7  | 16.85% | 1.155<br>595 | -                 |
| 231912                              | 6173 | 13 | 9.56%  | 0.5914<br>02 | 16 | 11.58% | 0.728<br>695 | Katnal1           |

|                                     |       |    |        |              |    |        |              |                   |
|-------------------------------------|-------|----|--------|--------------|----|--------|--------------|-------------------|
| 320977                              | 5195  | 13 | 10.45% | 0.7027<br>38 | 9  | 8.49%  | 0.487<br>056 | A330023<br>F24Rik |
| 14555                               | 2809  | 13 | 22.07% | 1.2996<br>53 | 5  | 7.30%  | 0.500<br>427 | Gpd1              |
| gi 40254547 ref N<br>M_019572.2     | 4147  | 13 | 10.27% | 0.8803<br>29 | 4  | 4.73%  | 0.271<br>174 | -                 |
| 26568                               | 2284  | 13 | 24.12% | 1.5983<br>91 | 5  | 10.73% | 0.615<br>455 | Slc27a3           |
| 105349                              | 1192  | 13 | 40.44% | 3.0626<br>88 | 6  | 20.55% | 1.415<br>133 | Akr1c18           |
| 225825                              | 2487  | 13 | 20.43% | 1.4679<br>23 | 9  | 15.52% | 1.017<br>393 | Cd226             |
| 93842                               | 4219  | 13 | 13.49% | 0.8653<br>06 | 5  | 5.81%  | 0.333<br>183 | Igsf9             |
| gi 13928671 ref N<br>M_031176.1     | 12021 | 13 | 4.16%  | 0.3036<br>96 | 4  | 1.63%  | 0.093<br>55  | -                 |
| gi 149275096 ref X<br>M_001471706.1 | 1161  | 13 | 10.25% | 3.1444<br>66 | 7  | 10.42% | 1.695<br>071 | -                 |
| 12055                               | 981   | 13 | 36.29% | 3.7214<br>32 | 15 | 39.86% | 4.298<br>772 | Bcl7c             |
| 67212                               | 780   | 13 | 55.64% | 4.6804<br>16 | 15 | 51.03% | 5.406<br>532 | Mrpl55            |
| 17961                               | 1473  | 13 | 30.75% | 2.4784<br>28 | 11 | 31.98% | 2.099<br>482 | Nat2              |
| 57294                               | 599   | 13 | 42.07% | 6.0946<br>99 | 6  | 25.38% | 2.816<br>09  | Rps27             |
| 69942                               | 1140  | 13 | 35.61% | 3.2023<br>9  | 11 | 31.49% | 2.712<br>751 | Rnf113a<br>1      |
| 11789                               | 12453 | 13 | 3.32%  | 0.2931<br>6  | 6  | 1.65%  | 0.135<br>456 | Apc               |
| 73582                               | 1439  | 13 | 30.79% | 2.5369<br>87 | 8  | 23%    | 1.562<br>972 | Camkmt            |
| 1E+08                               | 1267  | 13 | 30.94% | 2.8813<br>93 | 23 | 29.83% | 5.103<br>561 | Gm3651            |
| 320655                              | 2424  | 13 | 23.10% | 1.5060<br>74 | 18 | 23.76% | 2.087<br>671 | Pgap3             |
| 19726                               | 9187  | 13 | 5.98%  | 0.3973<br>79 | 20 | 8.95%  | 0.612<br>038 | Rfx3              |
| 109065                              | 2663  | 13 | 21.40% | 1.3709<br>07 | 4  | 6.27%  | 0.422<br>29  | Dnaaf2            |
| 380773                              | 427   | 13 | 65.81% | 8.5497<br>06 | 26 | 72.83% | 17.11<br>857 | Slirp             |
| gi 94387933 ref X<br>M_286230.5     | 2081  | 13 | 12.01% | 1.7543<br>13 | 8  | 13.55% | 1.080<br>787 | -                 |

|                                 |      |    |        |              |    |        |              |         |
|---------------------------------|------|----|--------|--------------|----|--------|--------------|---------|
| 215001                          | 2536 | 13 | 22.91% | 1.4395<br>6  | 9  | 14.87% | 0.997<br>735 | Wfikkn1 |
| 94279                           | 3228 | 13 | 12.02% | 1.1309<br>56 | 8  | 6.94%  | 0.696<br>753 | Sfxn2   |
| 331474                          | 4766 | 13 | 11.18% | 0.7659<br>93 | 3  | 3.08%  | 0.176<br>966 | Rgag4   |
| 19348                           | 3579 | 13 | 16.04% | 1.0200<br>4  | 13 | 14.03% | 1.021<br>183 | Kif20a  |
| 69903                           | 3169 | 13 | 17.99% | 1.1520<br>12 | 15 | 18.49% | 1.330<br>734 | Rasip1  |
| 16011                           | 5854 | 13 | 9.34%  | 0.6236<br>29 | 3  | 2.51%  | 0.144<br>076 | Igfbp5  |
| 319758                          | 8000 | 13 | 5.49%  | 0.4563<br>41 | 12 | 4.62%  | 0.421<br>709 | Rfx7    |
| 448850                          | 983  | 13 | 41.61% | 3.7138<br>6  | 14 | 45.17% | 4.004<br>024 | Znhit3  |
| 434156                          | 2424 | 13 | 23.10% | 1.5060<br>74 | 4  | 6.27%  | 0.463<br>927 | Eid2b   |
| 71514                           | 3500 | 13 | 7%     | 1.0430<br>64 | 10 | 5.51%  | 0.803<br>256 | Sfpq    |
| 66441                           | 766  | 13 | 41.38% | 4.7659<br>59 | 17 | 50.52% | 6.239<br>392 | Magohb  |
| 382014                          | 3773 | 13 | 15.50% | 0.9675<br>92 | 14 | 12.22% | 1.043<br>19  | Ano8    |
| 26888                           | 2553 | 13 | 18.80% | 1.4299<br>74 | 8  | 11.24% | 0.880<br>97  | Clec4a2 |
| 243834                          | 4316 | 13 | 14.25% | 0.8458<br>58 | 3  | 3.41%  | 0.195<br>417 | Zfp324  |
| 665155                          | 3286 | 13 | 8.06%  | 1.1109<br>93 | 6  | 5.72%  | 0.513<br>341 | Srp54b  |
| 383103                          | 3321 | 13 | 15.96% | 1.0992<br>85 | 7  | 7.98%  | 0.592<br>586 | Fam18a  |
| 101543                          | 1958 | 13 | 25.13% | 1.8645<br>17 | 11 | 25.79% | 1.579<br>436 | Wtip    |
| 320438                          | 3114 | 13 | 13.90% | 1.1723<br>59 | 10 | 14.80% | 0.902<br>825 | Alg6    |
| 219114                          | 2260 | 13 | 19.65% | 1.6153<br>65 | 18 | 26.46% | 2.239<br>165 | Ska3    |
| 17763                           | 1594 | 13 | 19.13% | 2.2902<br>91 | 8  | 15.50% | 1.410<br>99  | Mtcp1   |
| gi 142344970 ref NM_026048.3    | 1986 | 13 | 23.51% | 1.8382<br>3  | 19 | 26.99% | 2.689<br>654 | -       |
| gi 149254079 ref XM_001487796.1 | 666  | 13 | 37.69% | 5.4815<br>68 | 7  | 35.29% | 2.954<br>921 | -       |

|                              |      |    |        |              |    |        |              |                   |
|------------------------------|------|----|--------|--------------|----|--------|--------------|-------------------|
| 19651                        | 4895 | 13 | 8.91%  | 0.7458<br>07 | 7  | 6.29%  | 0.402<br>038 | Rbl2              |
| 80901                        | 1893 | 13 | 28.42% | 1.9285<br>39 | 9  | 21.66% | 1.336<br>639 | Cxcr6             |
| 58187                        | 1200 | 13 | 28.58% | 3.0422<br>7  | 16 | 24.42% | 3.748<br>529 | Cldn10            |
| 74603                        | 1622 | 13 | 22.75% | 2.2507<br>55 | 2  | 6.04%  | 0.346<br>658 | Cd200r3           |
| 16832                        | 1324 | 13 | 38.52% | 2.7573<br>45 | 16 | 39.20% | 3.397<br>458 | Ldhb              |
| 68394                        | 1231 | 13 | 40.70% | 2.9656<br>58 | 13 | 37.45% | 2.968<br>981 | Ccdc163           |
| gi 118129983 ref NM_138744.2 | 3396 | 13 | 17.08% | 1.0750<br>07 | 15 | 21.61% | 1.241<br>783 | -                 |
| 72386                        | 1848 | 13 | 28.19% | 1.9755       | 14 | 25.27% | 2.129<br>846 | 2610035<br>D17Rik |
| 71004                        | 1861 | 13 | 22.89% | 1.9617       | 20 | 29.98% | 3.021<br>383 | 4931440<br>P22Rik |
| 103142                       | 2698 | 13 | 6.41%  | 1.3531<br>23 | 29 | 8.60%  | 3.021<br>887 | Rdh9              |
| 234515                       | 4122 | 13 | 14.85% | 0.8856<br>68 | 5  | 5.94%  | 0.341<br>023 | Inpp4b            |
| 234094                       | 5484 | 13 | 9.35%  | 0.6657<br>05 | 8  | 7.15%  | 0.410<br>124 | Arhgef1<br>0      |
| 107371                       | 2737 | 13 | 13.63% | 1.3338<br>42 | 10 | 14.65% | 1.027<br>182 | Exoc6             |
| 69165                        | 2020 | 13 | 25.59% | 1.8072<br>89 | 37 | 52.13% | 5.149<br>588 | Cd209b            |
| 17470                        | 2363 | 13 | 24.42% | 1.5449<br>53 | 7  | 11.85% | 0.832<br>83  | Cd200             |
| 212090                       | 899  | 13 | 49.05% | 4.0608<br>73 | 24 | 62.96% | 7.505<br>397 | Tmem60            |
| gi 158517903 ref NM_133765.3 | 1819 | 13 | 27.05% | 2.0069<br>95 | 12 | 21.39% | 1.854<br>687 | -                 |
| 66446                        | 1037 | 13 | 40.60% | 3.5204<br>67 | 6  | 20.73% | 1.626<br>652 | Exosc7            |
| 77766                        | 3902 | 13 | 14.51% | 0.9356<br>03 | 10 | 10.61% | 0.720<br>501 | Elp4              |
| 238037                       | 2936 | 13 | 12.43% | 1.2434<br>35 | 8  | 9.67%  | 0.766<br>048 | BC0682<br>81      |
| 67087                        | 2686 | 13 | 19.40% | 1.3591<br>68 | 11 | 14.89% | 1.151<br>354 | Ctnnbip1          |
| 214345                       | 3103 | 13 | 15.82% | 1.1765<br>15 | 5  | 6.38%  | 0.453<br>013 | Lrrc1             |

|                              |      |    |        |              |    |        |              |                   |
|------------------------------|------|----|--------|--------------|----|--------|--------------|-------------------|
| 100855                       | 4783 | 13 | 10.43% | 0.7632<br>71 | 5  | 3.30%  | 0.293<br>895 | Tbc1d14           |
| 57913                        | 2900 | 13 | 16.86% | 1.2588<br>71 | 6  | 10.14% | 0.581<br>668 | Lrdd              |
| 383196                       | 414  | 13 | 36.96% | 8.8181<br>75 | 9  | 35.02% | 6.111<br>732 | Gm5222            |
| 69953                        | 1194 | 13 | 37.94% | 3.0575<br>58 | 9  | 29.98% | 2.119<br>143 | 2810025<br>M15Rik |
| 193838                       | 1521 | 13 | 31.36% | 2.4002<br>13 | 12 | 33.20% | 2.218<br>064 | Eme2              |
| 332397                       | 3945 | 13 | 12.34% | 0.9254<br>05 | 17 | 13.38% | 1.211<br>502 | Nanos1            |
| 209737                       | 4840 | 13 | 12.73% | 0.7542<br>82 | 18 | 15.81% | 1.045<br>561 | Kif15             |
| 75570                        | 1415 | 13 | 26.78% | 2.5800<br>17 | 12 | 34.70% | 2.384<br>223 | Nhej1             |
| 270076                       | 2197 | 13 | 22.80% | 1.6616<br>86 | 6  | 13.38% | 0.767<br>792 | Gcdh              |
| 68128                        | 1565 | 13 | 26.77% | 2.3327<br>31 | 17 | 36.29% | 3.053<br>913 | Fam120a<br>os     |
| 12298                        | 7981 | 13 | 7.38%  | 0.4574<br>27 | 23 | 13.02% | 0.810<br>201 | Cacnb4            |
| 1E+08                        | 7912 | 13 | 5.99%  | 0.4614<br>16 | 15 | 6.95%  | 0.533        | Gm3414            |
| 270906                       | 3827 | 13 | 13.01% | 0.9539<br>39 | 17 | 11.78% | 1.248<br>857 | Prr11             |
| 106861                       | 1903 | 13 | 26.38% | 1.9184<br>05 | 13 | 26.69% | 1.920<br>555 | Abhd3             |
| 70235                        | 1707 | 13 | 31.75% | 2.1386<br>79 | 5  | 12.07% | 0.823<br>491 | Poc1a             |
| 211651                       | 4780 | 13 | 12.36% | 0.7637<br>5  | 5  | 5.13%  | 0.294<br>079 | Fancd2            |
| gi 133892656 ref NM_177101.4 | 1478 | 13 | 35.18% | 2.4700<br>44 | 7  | 22.33% | 1.331<br>514 | -                 |
| 217653                       | 4038 | 13 | 12.26% | 0.9040<br>92 | 10 | 12.13% | 0.696<br>235 | Misl8bp<br>1      |
| 353499                       | 2346 | 13 | 25.92% | 1.5561<br>49 | 6  | 10.53% | 0.719<br>027 | Tmc4              |
| 319953                       | 2074 | 13 | 25.31% | 1.7602<br>34 | 8  | 17.36% | 1.084<br>435 | Ttll1             |
| 228662                       | 4979 | 13 | 10.66% | 0.7332<br>24 | 3  | 2.95%  | 0.169<br>395 | Btbd3             |
| 54615                        | 1007 | 13 | 40.52% | 3.6253<br>47 | 12 | 38.33% | 3.350<br>224 | Npff              |

|                                     |      |    |        |              |    |        |              |                   |
|-------------------------------------|------|----|--------|--------------|----|--------|--------------|-------------------|
| 14537                               | 4624 | 13 | 12.35% | 0.7895<br>17 | 13 | 9.97%  | 0.790<br>401 | Gent1             |
| 20972                               | 4192 | 13 | 9.83%  | 0.8708<br>79 | 4  | 2.34%  | 0.268<br>263 | Syngn1            |
| 16189                               | 624  | 13 | 49.36% | 5.8505<br>2  | 2  | 9.13%  | 0.901<br>089 | Il4               |
| 69544                               | 1806 | 13 | 27.30% | 2.0214<br>42 | 8  | 19.88% | 1.245<br>358 | Wdr5b             |
| 56460                               | 2926 | 13 | 14.73% | 1.2476<br>84 | 9  | 11.69% | 0.864<br>749 | Pkp3              |
| 21949                               | 2228 | 13 | 19.17% | 1.6385<br>66 | 1  | 2.20%  | 0.126<br>185 | Tnfsf8            |
| 22173                               | 3307 | 13 | 4.02%  | 1.1039<br>38 | 20 | 4.17%  | 1.700<br>27  | Tyr               |
| 29870                               | 2737 | 13 | 20.83% | 1.3338<br>42 | 2  | 3.58%  | 0.205<br>436 | Gtse1             |
| 332359                              | 2147 | 13 | 15.28% | 1.7003<br>84 | 13 | 14.39% | 1.702<br>29  | Tigd3             |
| gi 149255610 ref X<br>M_001477334.1 | 827  | 13 | 37.24% | 4.4144<br>19 | 17 | 45.47% | 5.779<br>171 | -                 |
| 639281                              | 1469 | 13 | 21.24% | 2.4851<br>77 | 3  | 6.74%  | 0.574<br>145 | Gm1038<br>2       |
| 338363                              | 2552 | 13 | 17.01% | 1.4305<br>35 | 19 | 34.09% | 2.093<br>124 | Tmem24<br>1       |
| 66236                               | 1350 | 13 | 35.63% | 2.7042<br>4  | 11 | 23.11% | 2.290<br>768 | 1500011<br>B03Rik |
| 212153                              | 3643 | 13 | 13.31% | 1.0021<br>2  | 6  | 8.07%  | 0.463<br>035 | 2610015<br>P09Rik |
| 12850                               | 871  | 13 | 43.28% | 4.1914<br>17 | 11 | 38.58% | 3.550<br>558 | Coq7              |
| 210710                              | 2129 | 13 | 23.20% | 1.7147<br>6  | 13 | 23.44% | 1.716<br>682 | Gab3              |
| 56321                               | 1844 | 13 | 16.05% | 1.9797<br>86 | 8  | 11.98% | 1.219<br>695 | Aatf              |
| gi 149258260 ref X<br>M_001480473.1 | 677  | 13 | 20.38% | 5.3925<br>03 | 13 | 20.38% | 5.398<br>546 | -                 |
| 12502                               | 1023 | 13 | 43.99% | 3.5686<br>46 | 2  | 9.58%  | 0.549<br>638 | Cd3g              |
| 218341                              | 2807 | 13 | 14.71% | 1.3005<br>79 | 10 | 16.21% | 1.001<br>566 | Rfcsd             |
| 381110                              | 1802 | 13 | 26.42% | 2.0259<br>29 | 11 | 25.86% | 1.716<br>169 | Fam82a1           |
| 67141                               | 1820 | 13 | 30.16% | 2.0058<br>93 | 7  | 16.98% | 1.081<br>306 | Fbxo5             |



|                                  |       |    |        |              |    |        |              |                   |
|----------------------------------|-------|----|--------|--------------|----|--------|--------------|-------------------|
| 14062                            | 3296  | 13 | 17.69% | 1.1076<br>23 | 16 | 20.72% | 1.364<br>756 | F2r               |
| 668272                           | 1768  | 13 | 23.08% | 2.0648<br>89 | 5  | 12.84% | 0.795<br>078 | Gm9079            |
| 56325                            | 3334  | 13 | 15.72% | 1.0949<br>98 | 5  | 6.09%  | 0.421<br>625 | Abcb9             |
| 1E+08                            | 10281 | 13 | 1.24%  | 0.3550<br>94 | 12 | 2.13%  | 0.328<br>147 | Gm3871            |
| 70207                            | 1351  | 13 | 36.12% | 2.7022<br>39 | 3  | 10.88% | 0.624<br>292 | Taco1             |
| 268822                           | 2052  | 13 | 20.52% | 1.7791<br>06 | 9  | 21.15% | 1.233<br>069 | Adck5             |
| 1E+08                            | 1414  | 13 | 35.15% | 2.5818<br>42 | 18 | 46.18% | 3.578<br>864 | Gm2701            |
| 108075                           | 5322  | 13 | 10.15% | 0.6859<br>69 | 2  | 1.84%  | 0.105<br>652 | Ltbp4             |
| 223332                           | 4128  | 13 | 2.96%  | 0.8843<br>81 | 32 | 2.98%  | 2.179<br>377 | Ranbp31           |
| gi 256355141 ref N<br>R_015500.1 | 2142  | 12 | 24.32% | 1.5732<br>49 | 4  | 7.98%  | 0.525<br>004 | -                 |
| 14696                            | 2751  | 12 | 17.48% | 1.2249<br>73 | 6  | 8.76%  | 0.613<br>173 | Gnb4              |
| 67885                            | 812   | 12 | 51.60% | 4.1501<br>23 | 10 | 33.50% | 3.462<br>311 | 1500011<br>K16Rik |
| 1E+08                            | 596   | 12 | 20.30% | 5.6541<br>94 | 10 | 20.64% | 4.717<br>108 | Gm4375            |
| 14433                            | 1254  | 12 | 4.23%  | 2.6873<br>2  | 22 | 4.31%  | 4.932<br>275 | Gapdh             |
| 20208                            | 607   | 12 | 64.25% | 5.5517<br>29 | 37 | 80.07% | 17.13<br>701 | Saa1              |
| gi 149259403 ref X<br>R_030544.1 | 2652  | 12 | 15.16% | 1.2707<br>01 | 4  | 6.71%  | 0.424<br>042 | -                 |
| 20335                            | 779   | 12 | 28.63% | 4.3259<br>3  | 15 | 37.74% | 5.413<br>472 | Sec61g            |
| 106707                           | 1703  | 12 | 25.66% | 1.9788<br>02 | 10 | 20.20% | 1.650<br>849 | Rpusd1            |
| 22750                            | 3921  | 12 | 8.72%  | 0.8594<br>49 | 15 | 14.79% | 1.075<br>515 | Zfp9              |
| 223646                           | 1890  | 12 | 28.36% | 1.7830<br>16 | 5  | 11.43% | 0.743<br>756 | Naprt1            |
| 230751                           | 2152  | 12 | 16.50% | 1.5659<br>38 | 9  | 13.75% | 1.175<br>77  | Oscp1             |
| 69770                            | 651   | 12 | 52.07% | 5.1764<br>97 | 18 | 70.05% | 7.773<br>447 | 1600002<br>K03Rik |

|                                     |      |    |        |              |    |        |              |                   |
|-------------------------------------|------|----|--------|--------------|----|--------|--------------|-------------------|
| 68816                               | 1215 | 12 | 30.78% | 2.7735<br>8  | 12 | 29.30% | 2.776<br>688 | Ppil1             |
| 16456                               | 2482 | 12 | 15.07% | 1.3577<br>36 | 15 | 23.13% | 1.699<br>071 | F11r              |
| 16816                               | 1370 | 12 | 35.99% | 2.4597<br>81 | 11 | 39.34% | 2.257<br>326 | Lcat              |
| 77252                               | 1125 | 12 | 32.98% | 2.9954<br>66 | 28 | 68.27% | 6.997<br>254 | 9430038<br>I01Rik |
| 382117                              | 3053 | 12 | 16.08% | 1.1037<br>99 | 8  | 12.81% | 0.736<br>691 | D9Ert4<br>02e     |
| 20471                               | 2849 | 12 | 16.64% | 1.1828<br>36 | 11 | 18.11% | 1.085<br>481 | Six1              |
| gi 170172541 ref N<br>M_001033301.3 | 4091 | 12 | 14.37% | 0.8237<br>35 | 2  | 2.40%  | 0.137<br>443 | -                 |
| 56009                               | 1273 | 12 | 33.23% | 2.6472<br>11 | 9  | 28.75% | 1.987<br>633 | Alyref2           |
| 18821                               | 2480 | 12 | 18.75% | 1.3588<br>3  | 4  | 7.50%  | 0.453<br>451 | Pln               |
| 18392                               | 3027 | 12 | 16.45% | 1.1132<br>8  | 6  | 9.71%  | 0.557<br>264 | Orc1              |
| 75698                               | 3463 | 12 | 15.16% | 0.9731<br>16 | 10 | 14.15% | 0.811<br>838 | Fam35a            |
| 77889                               | 3068 | 12 | 5.12%  | 1.0984<br>03 | 8  | 5.22%  | 0.733<br>089 | Lbh               |
| gi 71274133 ref N<br>M_001029890.1  | 5333 | 12 | 9.21%  | 0.6318<br>96 | 5  | 4.59%  | 0.263<br>585 | -                 |
| 67019                               | 1703 | 12 | 26.89% | 1.9788<br>02 | 9  | 24.19% | 1.485<br>765 | Actr6             |
| 56390                               | 690  | 12 | 63.48% | 4.8839<br>12 | 10 | 50.43% | 4.074<br>488 | Sssca1            |
| 108811                              | 1721 | 12 | 32.36% | 1.9581<br>05 | 11 | 24.46% | 1.796<br>941 | Ccdc122           |
| 19876                               | 7568 | 12 | 7.61%  | 0.4452<br>83 | 2  | 1.29%  | 0.074<br>297 | Robo1             |
| 246179                              | 3382 | 12 | 14.64% | 0.9964<br>22 | 7  | 10.14% | 0.581<br>898 | Fktn              |
| 67826                               | 1837 | 12 | 27.16% | 1.8344<br>58 | 10 | 21.39% | 1.530<br>428 | Snap47            |
| 226922                              | 6992 | 12 | 7.88%  | 0.4819<br>65 | 7  | 4.58%  | 0.281<br>461 | Kcnq5             |
| 71365                               | 1773 | 12 | 27.86% | 1.9006<br>77 | 7  | 18.22% | 1.109<br>97  | Pdss2             |
| 57373                               | 973  | 12 | 48.92% | 3.4634<br>12 | 25 | 50.57% | 7.223<br>527 | Akip1             |

|                                 |      |    |        |              |    |        |              |              |
|---------------------------------|------|----|--------|--------------|----|--------|--------------|--------------|
| 65255                           | 3286 | 12 | 16.65% | 1.0255<br>32 | 22 | 29.31% | 1.882<br>25  | Asb4         |
| 208194                          | 3905 | 12 | 12.57% | 0.8629<br>7  | 6  | 7.53%  | 0.431<br>969 | Exog         |
| 21804                           | 3058 | 12 | 18.15% | 1.1019<br>95 | 6  | 9.61%  | 0.551<br>615 | Tgfb1i1      |
| 328162                          | 2441 | 12 | 16.22% | 1.3805<br>41 | 7  | 13.27% | 0.806<br>218 | Trmt61a      |
| 83383                           | 2113 | 12 | 21.96% | 1.5948<br>41 | 1  | 2.32%  | 0.133<br>052 | Tfap4        |
| 54392                           | 3698 | 12 | 15.52% | 0.9112<br>76 | 9  | 8.22%  | 0.684<br>223 | Ncapg        |
| 109136                          | 2843 | 12 | 18.36% | 1.1853<br>32 | 5  | 8.09%  | 0.494<br>442 | Mmaa         |
| 242126                          | 6641 | 12 | 8.85%  | 0.5074<br>39 | 25 | 14.76% | 1.058<br>348 | Slc22a15     |
| 69487                           | 2732 | 12 | 18.63% | 1.2334<br>92 | 2  | 3.59%  | 0.205<br>812 | Ndufaf5      |
| 105732                          | 4545 | 12 | 12.94% | 0.7414<br>52 | 12 | 9.55%  | 0.742<br>283 | Fam83h       |
| 672884                          | 3768 | 12 | 7.19%  | 0.8943<br>47 | 4  | 5.04%  | 0.298<br>45  | Gm9581       |
| 242202                          | 6728 | 12 | 8.74%  | 0.5008<br>77 | 6  | 4.10%  | 0.250<br>719 | Pde5a        |
| 67774                           | 1777 | 12 | 24.70% | 1.8963<br>98 | 15 | 26.62% | 2.373<br>154 | Loh12cr<br>1 |
| 22141                           | 5941 | 12 | 9.90%  | 0.5672<br>28 | 1  | 0.82%  | 0.047<br>322 | Tub          |
| gi 149264344 ref XR_033686.1    | 2113 | 12 | 22.62% | 1.5948<br>41 | 6  | 11.64% | 0.798<br>314 | -            |
| 233057                          | 2806 | 12 | 18.25% | 1.2009<br>62 | 9  | 14.04% | 0.901<br>731 | Zfp940       |
| 18619                           | 1442 | 12 | 29.61% | 2.3369<br>62 | 8  | 24.06% | 1.559<br>721 | Penk         |
| 70605                           | 2562 | 12 | 21.27% | 1.3153<br>39 | 10 | 18.23% | 1.097<br>345 | Zdhhc24      |
| 105351                          | 2010 | 12 | 23.38% | 1.6765<br>67 | 10 | 23.68% | 1.398<br>705 | AW2094<br>91 |
| 71254                           | 3173 | 12 | 11.76% | 1.0620<br>55 | 6  | 7.09%  | 0.531<br>622 | Naif1        |
| gi 149267928 ref XM_001480030.1 | 1600 | 12 | 30.19% | 2.1061<br>87 | 6  | 12.31% | 1.054<br>274 | -            |
| gi 118129822 ref NM_026257.2    | 1559 | 12 | 28.80% | 2.1615<br>78 | 7  | 20.46% | 1.262<br>333 | -            |

|                                     |      |    |        |              |    |        |              |                   |
|-------------------------------------|------|----|--------|--------------|----|--------|--------------|-------------------|
| 14793                               | 1488 | 12 | 30.78% | 2.2647<br>17 | 15 | 33.40% | 2.834<br>069 | Cdca3             |
| 26450                               | 2183 | 12 | 18.55% | 1.5437<br>01 | 8  | 13.19% | 1.030<br>287 | Rbbp9             |
| 76212                               | 1379 | 12 | 11.09% | 2.4437<br>27 | 17 | 7.54%  | 3.465<br>826 | 6530403<br>M18Rik |
| 13196                               | 4612 | 12 | 5.03%  | 0.7306<br>81 | 4  | 2.58%  | 0.243<br>833 | Asap1             |
| 224829                              | 4560 | 12 | 11.82% | 0.7390<br>13 | 5  | 5.37%  | 0.308<br>267 | Trerf1            |
| gi 149274920 ref X<br>M_001475919.1 | 402  | 12 | 70.90% | 8.3828<br>35 | 3  | 34.83% | 2.098<br>057 | -                 |
| 219249                              | 2717 | 12 | 16.56% | 1.2403<br>02 | 7  | 10.89% | 0.724<br>32  | Tdrd3             |
| 269582                              | 5011 | 12 | 11.08% | 0.6725       | 9  | 7.04%  | 0.504<br>941 | Clspn             |
| 74843                               | 1829 | 12 | 29.25% | 1.8424<br>82 | 9  | 17.39% | 1.383<br>41  | Zmynd1<br>7       |
| 71862                               | 2206 | 12 | 24.52% | 1.5276<br>06 | 12 | 21.08% | 1.529<br>318 | Gpr160            |
| gi 256355052 ref N<br>R_015585.1    | 1878 | 12 | 23.48% | 1.7944<br>09 | 6  | 15.18% | 0.898<br>21  | -                 |
| 75578                               | 1910 | 12 | 16.34% | 1.7643<br>45 | 12 | 15.39% | 1.766<br>322 | Fggy              |
| 207798                              | 3506 | 12 | 13.66% | 0.9611<br>81 | 8  | 9.18%  | 0.641<br>505 | Gramd1c           |
| 26905                               | 3587 | 12 | 2.20%  | 0.9394<br>76 | 18 | 7.58%  | 1.410<br>793 | Eif2s3x           |
| 240186                              | 3209 | 12 | 15.05% | 1.0501<br>4  | 10 | 13.59% | 0.876<br>097 | Zfp438            |
| 66457                               | 1495 | 12 | 25.69% | 2.2541<br>13 | 10 | 26.56% | 1.880<br>533 | 2810002<br>D19Rik |
| 14453                               | 2137 | 12 | 23.58% | 1.5769<br>3  | 3  | 6.88%  | 0.394<br>674 | Gas2              |
| 69747                               | 776  | 12 | 47.94% | 4.3426<br>54 | 3  | 18.94% | 1.086<br>88  | Zswim7            |
| gi 149274557 ref X<br>M_911416.3    | 381  | 12 | 86.09% | 8.8448<br>81 | 3  | 38.58% | 2.213<br>698 | -                 |
| 58229                               | 2754 | 12 | 12.45% | 1.2236<br>38 | 10 | 15.18% | 1.020<br>841 | Ccdc48            |
| 23834                               | 4608 | 12 | 12.07% | 0.7313<br>15 | 11 | 10.11% | 0.671<br>123 | Cdc6              |
| gi 118130093 ref N<br>M_153582.4    | 1298 | 12 | 36.83% | 2.5962<br>25 | 7  | 22.65% | 1.516<br>162 | -                 |

|                                     |      |    |        |              |    |        |              |                   |
|-------------------------------------|------|----|--------|--------------|----|--------|--------------|-------------------|
| 20522                               | 3009 | 12 | 13.23% | 1.1199<br>4  | 17 | 19.38% | 1.588<br>36  | Slc23a1           |
| 170936                              | 2869 | 12 | 17.60% | 1.1745<br>9  | 7  | 10.32% | 0.685<br>945 | Zfp369            |
| 12176                               | 1756 | 12 | 20.33% | 1.9190<br>77 | 6  | 9.91%  | 0.960<br>614 | Bnip3             |
| 333654                              | 3130 | 12 | 14.63% | 1.0766<br>45 | 14 | 12.49% | 1.257<br>494 | Ppp1r13l          |
| 72754                               | 4525 | 12 | 6.81%  | 0.7447<br>29 | 9  | 6.94%  | 0.559<br>173 | Arhgef1<br>0l     |
| gi 142363757 ref N<br>M_009685.2    | 2593 | 12 | 22.33% | 1.2996<br>14 | 4  | 5.82%  | 0.433<br>69  | -                 |
| 67917                               | 3089 | 12 | 18.39% | 1.0909<br>35 | 10 | 13.37% | 0.910<br>132 | Zcchc3            |
| 56873                               | 4949 | 12 | 10.97% | 0.6809<br>25 | 16 | 14.08% | 0.908<br>918 | Lmbr1             |
| 19881                               | 1526 | 12 | 29.69% | 2.2083<br>22 | 4  | 12.12% | 0.736<br>932 | Rom1              |
| 12511                               | 3034 | 12 | 16.02% | 1.1107<br>12 | 2  | 3.23%  | 0.185<br>326 | Cd6               |
| 76464                               | 6525 | 12 | 8%     | 0.5164<br>6  | 4  | 3%     | 0.172<br>346 | Casc5             |
| 227120                              | 6555 | 12 | 7.78%  | 0.5140<br>96 | 9  | 4.45%  | 0.386<br>004 | Plc1l             |
| gi 149271098 ref X<br>R_032115.1    | 4288 | 12 | 2.61%  | 0.7858<br>91 | 20 | 2.64%  | 1.311<br>286 | -                 |
| gi 171906570 ref N<br>M_026203.2    | 4833 | 12 | 11.32% | 0.6972<br>69 | 11 | 9.64%  | 0.639<br>879 | -                 |
| 108816                              | 4551 | 12 | 5.03%  | 0.7404<br>75 | 17 | 4.31%  | 1.050<br>181 | 4933409<br>K07Rik |
| gi 118131121 ref N<br>M_001033209.2 | 3383 | 12 | 16.29% | 0.9961<br>28 | 14 | 16.61% | 1.163<br>451 | -                 |
| 258783                              | 1960 | 12 | 25.87% | 1.7193<br>37 | 3  | 7.50%  | 0.430<br>316 | Olfir920          |
| 170439                              | 5951 | 12 | 9.88%  | 0.5662<br>75 | 6  | 4.54%  | 0.283<br>455 | Elovl6            |
| 68010                               | 5040 | 12 | 9.66%  | 0.6686<br>31 | 20 | 10.67% | 1.115<br>634 | Bambi             |
| 1E+08                               | 2514 | 12 | 20.92% | 1.3404<br>53 | 9  | 14.80% | 1.006<br>467 | LOC100<br>044193  |
| 269529                              | 4655 | 12 | 12.63% | 0.7239<br>31 | 8  | 7.09%  | 0.483<br>162 | Fbxo10            |
| gi 94372757 ref X<br>M_485486.4     | 4819 | 12 | 10.35% | 0.6992<br>94 | 11 | 10.13% | 0.641<br>738 | -                 |

|                                     |      |    |        |              |    |        |              |         |
|-------------------------------------|------|----|--------|--------------|----|--------|--------------|---------|
| 71846                               | 1230 | 12 | 27.89% | 2.7397<br>56 | 5  | 14.31% | 1.142<br>844 | Syce2   |
| gi 149263902 ref X<br>M_001474366.1 | 1642 | 12 | 26.98% | 2.0523<br>14 | 13 | 27.28% | 2.225<br>832 | -       |
| 12006                               | 4279 | 12 | 12.67% | 0.7875<br>44 | 12 | 13.53% | 0.788<br>426 | Axin2   |
| 327942                              | 1657 | 12 | 30.96% | 2.0337<br>35 | 10 | 24.92% | 1.696<br>679 | Pigl    |
| 69876                               | 1133 | 12 | 35.39% | 2.9743<br>16 | 5  | 21.62% | 1.240<br>687 | Thap3   |
| 67590                               | 2754 | 12 | 17.10% | 1.2236<br>38 | 6  | 10.68% | 0.612<br>505 | Tctn3   |
| 241547                              | 2321 | 12 | 20.55% | 1.4519<br>17 | 8  | 15.47% | 0.969<br>029 | Harbi1  |
| 55951                               | 907  | 12 | 13.89% | 3.7154<br>35 | 9  | 16.21% | 2.789<br>699 | Mpc1    |
| 22156                               | 2564 | 12 | 17.43% | 1.3143<br>13 | 16 | 23.32% | 1.754<br>382 | Tuft1   |
| 320802                              | 3230 | 12 | 11.86% | 1.0433<br>13 | 17 | 10.99% | 1.479<br>682 | Ifitm10 |
| 72297                               | 2103 | 12 | 20.97% | 1.6024<br>25 | 4  | 9.32%  | 0.534<br>74  | B3gnt3  |
| 70425                               | 4394 | 12 | 7.51%  | 0.7669<br>32 | 5  | 3.87%  | 0.319<br>913 | Csnk1g3 |
| gi 147903348 ref N<br>M_023124.4    | 1183 | 12 | 26.37% | 2.8486<br>05 | 4  | 8.96%  | 0.950<br>599 | -       |
| 102920                              | 3148 | 12 | 17.28% | 1.0704<br>89 | 11 | 16.52% | 0.982<br>381 | Cenpi   |
| 66938                               | 2234 | 12 | 23.28% | 1.5084<br>6  | 16 | 29.01% | 2.013<br>534 | Sh3d21  |
| 109648                              | 561  | 12 | 46.35% | 6.0069<br>51 | 9  | 55.44% | 4.510<br>262 | Npy     |
| gi 94410324 ref X<br>M_914633.2     | 423  | 12 | 67.38% | 7.9666<br>66 | 8  | 53.66% | 5.317<br>062 | -       |
| 217705                              | 3357 | 12 | 7.48%  | 1.0038<br>43 | 22 | 7.83%  | 1.842<br>44  | Fam161b |
| 17436                               | 3257 | 12 | 10.62% | 1.0346<br>64 | 5  | 5.37%  | 0.431<br>593 | Me1     |
| 57028                               | 2018 | 12 | 21.36% | 1.6699<br>2  | 4  | 9.71%  | 0.557<br>264 | Pdpx    |
| 224024                              | 3309 | 12 | 13.39% | 1.0184<br>04 | 16 | 20.64% | 1.359<br>394 | Scarf2  |
| 223642                              | 3338 | 12 | 8.12%  | 1.0095<br>56 | 12 | 7.10%  | 1.010<br>688 | Zc3h3   |

|                                     |      |    |        |              |    |        |              |                   |
|-------------------------------------|------|----|--------|--------------|----|--------|--------------|-------------------|
| 1E+08                               | 4548 | 12 | 11.30% | 0.7409<br>63 | 2  | 2.15%  | 0.123<br>632 | Gm1082<br>5       |
| 18762                               | 4283 | 12 | 11.56% | 0.7868<br>08 | 6  | 6.47%  | 0.393<br>845 | Prkcz             |
| 330173                              | 945  | 12 | 34.71% | 3.5660<br>31 | 11 | 35.45% | 3.272<br>525 | 2610524<br>H06Rik |
| gi 149253392 ref X<br>M_001471847.1 | 2507 | 12 | 12.60% | 1.3441<br>96 | 13 | 13.56% | 1.457<br>844 | -                 |
| 78214                               | 3600 | 12 | 14.44% | 0.9360<br>83 | 12 | 9.97%  | 0.937<br>132 | 4930589<br>O11Rik |
| gi 281332115 ref N<br>R_024201.2    | 3034 | 12 | 15.52% | 1.1107<br>12 | 7  | 9.99%  | 0.648<br>641 | -                 |
| gi 149274184 ref X<br>R_005086.2    | 2771 | 12 | 14.87% | 1.2161<br>31 | 9  | 12.74% | 0.913<br>121 | -                 |
| 668212                              | 6547 | 12 | 7.84%  | 0.5147<br>24 | 11 | 4.46%  | 0.472<br>359 | Efr3b             |
| 327762                              | 4122 | 12 | 13.54% | 0.8175<br>4  | 3  | 3.37%  | 0.204<br>614 | Dna2              |
| 11951                               | 805  | 12 | 17.89% | 4.1862<br>11 | 4  | 8.07%  | 1.396<br>967 | Atp5g1            |
| 22746                               | 2218 | 12 | 24.30% | 1.5193<br>42 | 10 | 19.03% | 1.267<br>537 | Zfp85-rs<br>1     |
| 68512                               | 701  | 12 | 36.09% | 4.8072<br>75 | 12 | 46.65% | 4.812<br>662 | Tomm5             |
| 106344                              | 1231 | 12 | 36.88% | 2.7375<br>3  | 8  | 24.78% | 1.827<br>065 | Rfc4              |
| 107522                              | 3436 | 12 | 5.73%  | 0.9807<br>62 | 20 | 7.01%  | 1.636<br>436 | Ece2              |
| 76375                               | 2217 | 12 | 17.55% | 1.5200<br>27 | 6  | 6.09%  | 0.760<br>865 | Det1              |
| gi 6680406 ref NM<br>_008357.1      | 1250 | 12 | 34.48% | 2.6959<br>2  | 20 | 44.32% | 4.498<br>235 | -                 |
| 109246                              | 3930 | 12 | 14.48% | 0.8574<br>81 | 26 | 26.67% | 1.859<br>957 | Tspan9            |
| 78795                               | 5157 | 12 | 11.40% | 0.6534<br>61 | 9  | 8.20%  | 0.490<br>645 | Armc9             |
| 231633                              | 2132 | 12 | 23.64% | 1.5806<br>28 | 3  | 6.89%  | 0.395<br>6   | Tmem11<br>9       |
| 170742                              | 1356 | 12 | 28.47% | 2.4851<br>77 | 6  | 21.68% | 1.243<br>981 | Sertad3           |
| 210004                              | 2866 | 12 | 17.83% | 1.1758<br>2  | 10 | 14.03% | 0.980<br>948 | B3gnt11           |
| 224840                              | 1745 | 12 | 26.88% | 1.9311<br>75 | 10 | 25.27% | 1.611<br>116 | Trem14            |

|                                     |      |    |        |              |    |        |              |                   |
|-------------------------------------|------|----|--------|--------------|----|--------|--------------|-------------------|
| 79560                               | 2155 | 12 | 19.63% | 1.5637<br>58 | 12 | 13.97% | 1.565<br>511 | Ublecp1           |
| gi 149274751 ref X<br>M_001473125.1 | 426  | 12 | 54.93% | 7.9105<br>62 | 3  | 19.95% | 1.979<br>857 | -                 |
| 57810                               | 7236 | 12 | 8.13%  | 0.4657<br>13 | 8  | 4.78%  | 0.310<br>823 | Cdon              |
| 13637                               | 2153 | 12 | 24.29% | 1.5652<br>11 | 2  | 4.55%  | 0.261<br>161 | Efna2             |
| 319190                              | 2618 | 12 | 20.63% | 1.2872<br>04 | 9  | 14.02% | 0.966<br>485 | Hist2h2b<br>e     |
| 433470                              | 672  | 11 | 48.96% | 4.5968<br>37 | 8  | 37.65% | 3.346<br>901 | AA4671<br>97      |
| 231570                              | 6756 | 11 | 7.79%  | 0.4572<br>34 | 1  | 0.73%  | 0.041<br>613 | A830010<br>M20Rik |
| 75939                               | 2004 | 11 | 21.36% | 1.5414<br>54 | 9  | 17.81% | 1.262<br>603 | 4930579<br>G24Rik |
| 56410                               | 4723 | 11 | 3.71%  | 0.6540<br>49 | 6  | 2.16%  | 0.357<br>154 | Cbln3             |
| 213011                              | 2765 | 11 | 14.68% | 1.1172<br>06 | 8  | 14.10% | 0.813<br>424 | Zfp583            |
| 73739                               | 1119 | 11 | 31.64% | 2.7605<br>67 | 9  | 32.44% | 2.261<br>177 | Cby1              |
| 29820                               | 4639 | 11 | 10.74% | 0.6658<br>92 | 2  | 2.11%  | 0.121<br>207 | Tnfrsf19          |
| 101122                              | 1269 | 11 | 28.21% | 2.4342<br>59 | 8  | 26.48% | 1.772<br>354 | Rpusd3            |
| gi 83999996 ref N<br>M_001038010.1  | 3095 | 11 | 10.40% | 0.9980<br>85 | 22 | 12.86% | 1.998<br>408 | -                 |
| 71816                               | 3785 | 11 | 12.02% | 0.8161<br>36 | 3  | 3.88%  | 0.222<br>832 | Rnf180            |
| gi 256355068 ref N<br>R_015606.1    | 2945 | 11 | 8.62%  | 1.0489<br>22 | 11 | 8.86%  | 1.050<br>097 | -                 |
| gi 149255608 ref X<br>M_001477291.1 | 534  | 11 | 37.08% | 5.7847<br>84 | 4  | 36.70% | 2.105<br>915 | -                 |
| 385354                              | 4647 | 11 | 6.67%  | 0.6647<br>46 | 20 | 7.42%  | 1.209<br>983 | Frmd7             |
| 12295                               | 1996 | 11 | 24.85% | 1.5476<br>33 | 2  | 2.45%  | 0.281<br>703 | Cacnb1            |
| 235050                              | 3238 | 11 | 14.18% | 0.9540<br>07 | 2  | 3.03%  | 0.173<br>65  | Zfp810            |
| 53885                               | 2260 | 11 | 22.48% | 1.3668<br>47 | 15 | 27.48% | 1.865<br>971 | Nphp1             |
| 546134                              | 1368 | 11 | 27.63% | 2.2580<br>95 | 6  | 21.49% | 1.233<br>069 | Gramd2            |



|                                     |      |    |        |              |    |        |              |                   |
|-------------------------------------|------|----|--------|--------------|----|--------|--------------|-------------------|
| 230661                              | 3032 | 11 | 15.57% | 1.0188<br>24 | 11 | 15.07% | 1.019<br>966 | Tesk2             |
| 668807                              | 1918 | 11 | 12.46% | 1.6105<br>71 | 13 | 18.61% | 1.905<br>535 | Gm9371            |
| 243372                              | 4083 | 11 | 12.81% | 0.7565<br>7  | 5  | 5.51%  | 0.344<br>281 | Zfp775            |
| 233067                              | 2861 | 11 | 18.70% | 1.0797<br>18 | 5  | 8.56%  | 0.491<br>331 | Lrfn3             |
| 239102                              | 8738 | 11 | 5.54%  | 0.3535<br>22 | 10 | 4.59%  | 0.321<br>744 | Zfhx2             |
| 18846                               | 6964 | 11 | 6.88%  | 0.4435<br>78 | 5  | 3.52%  | 0.201<br>852 | Plxna3            |
| gi 149268352 ref X<br>M_001476159.1 | 2186 | 11 | 19.49% | 1.4131<br>17 | 17 | 25.16% | 2.186<br>356 | -                 |
| 22690                               | 4161 | 11 | 11.87% | 0.7423<br>88 | 6  | 7.07%  | 0.405<br>392 | Zfp28             |
| 56513                               | 1291 | 11 | 34.86% | 2.3927<br>77 | 11 | 30.75% | 2.395<br>458 | Pard6a            |
| 432769                              | 2567 | 11 | 16.13% | 1.2033<br>79 | 5  | 9.12%  | 0.547<br>604 | Zfp708            |
| 1E+08                               | 3445 | 11 | 12.57% | 0.8966<br>83 | 19 | 20.90% | 1.550<br>553 | Gm1576<br>0       |
| 73467                               | 3008 | 11 | 12.83% | 1.0269<br>53 | 11 | 14.69% | 1.028<br>104 | 1700066<br>M21Rik |
| gi 149274425 ref X<br>M_001003625.2 | 360  | 11 | 73.89% | 8.5807<br>63 | 1  | 13.61% | 0.780<br>944 | -                 |
| 70237                               | 2843 | 11 | 17.52% | 1.0865<br>55 | -  | -      | -            | Bhlhb9            |
| 433752                              | 1919 | 11 | 27.72% | 1.6097<br>31 | 7  | 17.77% | 1.025<br>522 | AA4153<br>98      |
| 22163                               | 1155 | 11 | 32.03% | 2.6745<br>23 | 3  | 8.48%  | 0.730<br>233 | Tnfrsf4           |
| 791299                              | 3922 | 11 | 7.16%  | 0.7876<br>27 | 9  | 5.02%  | 0.645<br>145 | Gm1006<br>9       |
| 21821                               | 3097 | 11 | 16.08% | 0.9974<br>41 | 7  | 10.88% | 0.635<br>446 | Ift88             |
| 67052                               | 2201 | 11 | 19.08% | 1.4034<br>87 | 2  | 4.45%  | 0.255<br>465 | Ndc80             |
| 67441                               | 1065 | 11 | 40%    | 2.9005<br>4  | 2  | 9.20%  | 0.527<br>962 | Isoc2b            |
| 246104                              | 3767 | 11 | 13.01% | 0.8200<br>36 | 7  | 9.11%  | 0.522<br>426 | Rhbdl3            |
| 29856                               | 3397 | 11 | 14.04% | 0.9093<br>54 | 16 | 18.31% | 1.324<br>179 | Smtn              |

|                                  |      |    |        |              |    |        |              |                   |
|----------------------------------|------|----|--------|--------------|----|--------|--------------|-------------------|
| 94089                            | 1366 | 11 | 24.38% | 2.2614<br>02 | 10 | 31.48% | 2.058<br>123 | Trim7             |
| 21936                            | 1007 | 11 | 41.11% | 3.0676<br>01 | 8  | 29%    | 2.233<br>483 | Tnfrsf18          |
| 12659                            | 2525 | 11 | 19.09% | 1.2233<br>96 | 3  | 5.82%  | 0.334<br>027 | Ovgp1             |
| 105428                           | 1819 | 11 | 23.36% | 1.6982<br>27 | 6  | 15.50% | 0.927<br>344 | Fam149b           |
| 66971                            | 1970 | 11 | 21.52% | 1.5680<br>58 | 5  | 11.83% | 0.713<br>552 | Cdk5rap<br>1      |
| 12905                            | 1650 | 11 | 28.36% | 1.8721<br>66 | 17 | 35.70% | 2.896<br>59  | Cradd             |
| 17865                            | 3702 | 11 | 12.75% | 0.8344<br>34 | 7  | 8.70%  | 0.531<br>598 | Mybl2             |
| 633057                           | 1624 | 11 | 14.35% | 1.9021<br>4  | 5  | 12.07% | 0.865<br>578 | Gm7102            |
| 72658                            | 1187 | 11 | 29.15% | 2.6024<br>22 | 13 | 48.78% | 3.079<br>036 | 2700097<br>O09Rik |
| 56149                            | 2025 | 11 | 25.04% | 1.5254<br>69 | 19 | 34.62% | 2.637<br>854 | Grasp             |
| 238024                           | 2028 | 11 | 21.79% | 1.5232<br>12 | 2  | 4.83%  | 0.277<br>258 | Fn3krp            |
| 230577                           | 3075 | 11 | 15.32% | 1.0045<br>77 | 4  | 6.37%  | 0.365<br>71  | Pars2             |
| 268670                           | 3482 | 11 | 12.98% | 0.8871<br>55 | 2  | 2.81%  | 0.161<br>482 | Zfp759            |
| 100163                           | 3144 | 11 | 16.06% | 0.9825<br>3  | 8  | 10.43% | 0.715<br>368 | Pafah2            |
| 23961                            | 1848 | 11 | 24.30% | 1.6715<br>77 | 6  | 11.26% | 0.912<br>791 | Oas1b             |
| 23960                            | 1993 | 11 | 20.52% | 1.5499<br>62 | 22 | 32.92% | 3.103<br>398 | Oas1g             |
| 328795                           | 2953 | 11 | 15.81% | 1.0460<br>8  | 4  | 6.64%  | 0.380<br>819 | Ubash3a           |
| 69908                            | 3320 | 11 | 13.16% | 0.9304<br>44 | 9  | 10.84% | 0.762<br>126 | Rab3b             |
| 72205                            | 2312 | 11 | 21.97% | 1.3361<br>05 | 10 | 15.92% | 1.216<br>002 | Eml2              |
| gi 118129918 ref N<br>M_013502.2 | 2254 | 11 | 11.31% | 1.3704<br>86 | 9  | 7.94%  | 1.122<br>563 | -                 |
| 240665                           | 3819 | 11 | 12.54% | 0.8088<br>7  | 10 | 12.33% | 0.736<br>16  | Ccnj              |
| 16842                            | 2460 | 11 | 18.78% | 1.2557<br>21 | -  | -      | -            | Lef1              |

|                                     |      |    |        |              |    |        |              |                   |
|-------------------------------------|------|----|--------|--------------|----|--------|--------------|-------------------|
| 56291                               | 4258 | 11 | 4.79%  | 0.7254<br>75 | 7  | 2.63%  | 0.462<br>184 | Styx              |
| gi 262073013 ref N<br>R_029442.1    | 1371 | 11 | 14.22% | 2.2531<br>54 | 11 | 11.31% | 2.255<br>679 | -                 |
| 102371                              | 2283 | 11 | 18.53% | 1.3530<br>77 | 2  | 4.29%  | 0.246<br>29  | Myzap             |
| 93706                               | 4687 | 11 | 10.84% | 0.6590<br>73 | 5  | 5.23%  | 0.299<br>914 | Pcdhgc3           |
| 408062                              | 2300 | 11 | 19.91% | 1.3430<br>76 | 4  | 8.52%  | 0.488<br>939 | Zfp873            |
| gi 149260666 ref X<br>R_031765.1    | 708  | 11 | 30.93% | 4.3631       | 7  | 38.56% | 2.779<br>629 | -                 |
| 209488                              | 1225 | 11 | 39.02% | 2.5216<br>94 | 2  | 8%     | 0.459<br>004 | Hsh2d             |
| 207704                              | 2932 | 11 | 12.69% | 1.0535<br>73 | 16 | 18.83% | 1.534<br>186 | Gtpbp10           |
| 23830                               | 2877 | 11 | 17.03% | 1.0737<br>14 | 8  | 10.78% | 0.781<br>758 | Capn10            |
| gi 149254559 ref X<br>M_001473799.1 | 3181 | 11 | 15.78% | 0.9711<br>02 | 7  | 9.71%  | 0.618<br>666 | -                 |
| 381306                              | 2930 | 11 | 15.09% | 1.0542<br>92 | 9  | 10.75% | 0.863<br>569 | BC0553<br>24      |
| 218461                              | 4619 | 11 | 10.26% | 0.6687<br>76 | 11 | 9.59%  | 0.669<br>525 | Pde8b             |
| 20447                               | 3885 | 11 | 12.82% | 0.7951<br>29 | 2  | 2.52%  | 0.144<br>731 | St6galna<br>c3    |
| 622665                              | 2003 | 11 | 23.86% | 1.5422<br>24 | 5  | 12.23% | 0.701<br>796 | Ccdc17            |
| 240055                              | 6195 | 11 | 8.22%  | 0.4986<br>4  | 8  | 5.60%  | 0.363<br>054 | Neur11b           |
| 52428                               | 3439 | 11 | 12.71% | 0.8982<br>48 | 12 | 15.73% | 0.981<br>005 | Rhpn2             |
| 56332                               | 4191 | 11 | 11.81% | 0.7370<br>73 | 13 | 13.79% | 0.872<br>063 | Amotl2            |
| 223732                              | 4447 | 11 | 11.36% | 0.6946<br>42 | 5  | 5.51%  | 0.316<br>1   | Ldoc11            |
| 53878                               | 1570 | 11 | 26.18% | 1.9675<br>63 | 1  | 3.12%  | 0.179<br>07  | Svs2              |
| 74580                               | 3119 | 11 | 15.52% | 0.9904<br>05 | 22 | 31.23% | 1.983<br>031 | Pyroxd2           |
| 67486                               | 3060 | 11 | 12.88% | 1.0095<br>02 | 13 | 16.90% | 1.194<br>384 | Polr3g            |
| 66050                               | 795  | 11 | 51.82% | 3.8856<br>28 | 12 | 43.90% | 4.243<br>618 | 0610009<br>B22Rik |

|                                     |      |    |        |              |    |        |              |                   |
|-------------------------------------|------|----|--------|--------------|----|--------|--------------|-------------------|
| 72155                               | 1768 | 11 | 21.72% | 1.7472<br>14 | 7  | 18.50% | 1.113<br>11  | Cenpn             |
| 68145                               | 4192 | 11 | 10.95% | 0.7368<br>98 | 9  | 9.64%  | 0.603<br>592 | Etaa1             |
| 620695                              | 1291 | 11 | 25.79% | 2.3927<br>77 | 7  | 20.14% | 1.524<br>382 | Gm1388<br>9       |
| 16206                               | 4966 | 11 | 10.85% | 0.6220<br>45 | 6  | 5.60%  | 0.339<br>677 | Lrig1             |
| 211666                              | 593  | 11 | 48.57% | 5.2092<br>32 | 2  | 16.53% | 0.948<br>194 | Mgst2             |
| 69206                               | 1558 | 11 | 25.03% | 1.9827<br>18 | 1  | 3.15%  | 0.180<br>449 | 2010016<br>I18Rik |
| gi 149260273 ref X<br>R_032014.1    | 6308 | 11 | 0.82%  | 0.4897<br>07 | 9  | 1.60%  | 0.401<br>119 | -                 |
| 381045                              | 1096 | 11 | 35.95% | 2.8184<br>99 | 15 | 45.07% | 3.847<br>714 | Ccdc58            |
| 22637                               | 2180 | 11 | 20.92% | 1.4170<br>07 | 2  | 4.50%  | 0.257<br>926 | Zap70             |
| 68567                               | 1350 | 11 | 25.33% | 2.2882<br>03 | 5  | 15.63% | 1.041<br>258 | Cgref1            |
| 56306                               | 2640 | 11 | 9.96%  | 1.1701<br>04 | 4  | 5.95%  | 0.425<br>969 | Fam60a            |
| gi 149260802 ref X<br>M_001476918.1 | 1916 | 11 | 21.71% | 1.6122<br>52 | 33 | 41.34% | 4.842<br>176 | -                 |
| gi 149262111 ref X<br>R_030688.1    | 4053 | 11 | 12.26% | 0.7621<br>7  | 13 | 13.69% | 0.901<br>756 | -                 |
| 67306                               | 3361 | 11 | 14.43% | 0.9190<br>94 | 7  | 8.72%  | 0.585<br>533 | Fam164a           |
| 226419                              | 2072 | 11 | 21.24% | 1.4908<br>66 | 9  | 17.71% | 1.221<br>166 | Dyrk3             |
| 78038                               | 2146 | 11 | 21.39% | 1.4394<br>57 | 12 | 22.79% | 1.572<br>076 | Mccc2             |
| 58894                               | 6137 | 11 | 8.42%  | 0.5033<br>53 | 7  | 5%     | 0.320<br>674 | Zfp862            |
| gi 149247770 ref X<br>M_001475637.1 | 1031 | 11 | 12.03% | 2.9961<br>93 | 6  | 12.32% | 1.636<br>118 | -                 |
| 16571                               | 4712 | 11 | 11.25% | 0.6555<br>76 | 11 | 9.89%  | 0.656<br>311 | Kif4              |
| 68185                               | 834  | 11 | 47.84% | 3.7039<br>26 | 12 | 44.36% | 4.045<br>175 | Chchd8            |
| 67516                               | 3015 | 11 | 17.84% | 1.0245<br>69 | 14 | 19.80% | 1.305<br>458 | Kctd4             |
| gi 29789332 ref N<br>M_133850.1     | 3467 | 11 | 12.23% | 0.8909<br>94 | 18 | 9.43%  | 1.459<br>623 | -                 |

|                                     |       |    |        |              |    |        |              |                   |
|-------------------------------------|-------|----|--------|--------------|----|--------|--------------|-------------------|
| 619329                              | 2281  | 11 | 16.75% | 1.3542<br>63 | 3  | 6.44%  | 0.369<br>758 | F420015<br>M19Rik |
| 73420                               | 2719  | 11 | 17.03% | 1.1361<br>07 | 9  | 11.22% | 0.930<br>584 | 1700054<br>N08Rik |
| 240120                              | 1897  | 11 | 23.62% | 1.6284       | 7  | 13.65% | 1.037<br>416 | Zfp119b           |
| 227377                              | 3929  | 11 | 12.78% | 0.7862<br>24 | 4  | 4.02%  | 0.286<br>22  | Farp2             |
| 110902                              | 3527  | 11 | 14.20% | 0.8758<br>36 | 4  | 5.56%  | 0.318<br>843 | Chrna2            |
| 107995                              | 1793  | 11 | 24.21% | 1.7228<br>53 | 4  | 10.93% | 0.627<br>194 | Cdc20             |
| 66084                               | 1849  | 11 | 22.71% | 1.6706<br>73 | 9  | 16.71% | 1.368<br>446 | Rmnd1             |
| 65246                               | 15118 | 11 | 3.10%  | 0.2043<br>31 | 11 | 2.46%  | 0.204<br>56  | Xpo7              |
| 1E+08                               | 2093  | 11 | 7.55%  | 1.4759<br>08 | 4  | 3.15%  | 0.537<br>295 | Gm3322            |
| 11482                               | 3625  | 11 | 10.54% | 0.8521<br>59 | 6  | 8.11%  | 0.465<br>335 | Acvr11            |
| 73942                               | 1398  | 11 | 30.54% | 2.2096<br>38 | 11 | 34.55% | 2.212<br>115 | Fam151b           |
| 20315                               | 5670  | 11 | 2.59%  | 0.5448<br>1  | 38 | 9.68%  | 1.884<br>181 | Cxcl12            |
| gi 149247781 ref X<br>M_001475719.1 | 1480  | 11 | 22.09% | 2.0872<br>13 | 7  | 14.39% | 1.329<br>715 | -                 |
| 1E+08                               | 3287  | 11 | 6.24%  | 0.9397<br>85 | 6  | 3.95%  | 0.513<br>185 | Gm2282            |
| 13605                               | 4095  | 11 | 10.40% | 0.7543<br>53 | 9  | 10.77% | 0.617<br>889 | Ect2              |
| 52014                               | 4614  | 11 | 5.22%  | 0.6695       | 7  | 4.29%  | 0.426<br>523 | Nus1              |
| 208501                              | 494   | 11 | 68.02% | 6.2531<br>87 | 12 | 71.66% | 6.829<br>304 | 1810043<br>H04Rik |
| 73747                               | 1501  | 11 | 32.18% | 2.0580<br>11 | 8  | 22.98% | 1.498<br>413 | 1110034<br>G24Rik |
| 106795                              | 1773  | 11 | 21.09% | 1.7422<br>87 | 9  | 22.84% | 1.427<br>105 | Tcf19             |
| 654824                              | 921   | 11 | 40.28% | 3.3540<br>44 | 5  | 21.72% | 1.526<br>274 | Ankrd37           |
| 233071                              | 4415  | 11 | 10.53% | 0.6996<br>77 | 18 | 14.77% | 1.146<br>209 | Arhgap3<br>3      |
| gi 149253007 ref X<br>M_986119.2    | 7306  | 11 | 2.41%  | 0.4228<br>13 | 4  | 1.96%  | 0.153<br>923 | -                 |

|                                  |       |    |        |              |    |        |              |                   |
|----------------------------------|-------|----|--------|--------------|----|--------|--------------|-------------------|
| 77777                            | 1819  | 11 | 23.58% | 1.6982<br>27 | 7  | 11.60% | 1.081<br>901 | Ulbp1             |
| 279499                           | 3035  | 11 | 16.71% | 1.0178<br>17 | 10 | 13.84% | 0.926<br>325 | Kctd19            |
| 68021                            | 1224  | 11 | 34.40% | 2.5237<br>54 | 11 | 35.62% | 2.526<br>582 | Bph1              |
| 64384                            | 1484  | 11 | 28.23% | 2.0815<br>87 | 10 | 31.13% | 1.894<br>472 | Sirt3             |
| 23947                            | 5916  | 11 | 9.11%  | 0.5221<br>56 | 6  | 4.97%  | 0.285<br>132 | Mid2              |
| 414085                           | 2546  | 11 | 17.87% | 1.2133<br>05 | 8  | 12.37% | 0.883<br>392 | 9330151<br>L19Rik |
| 17199                            | 3670  | 11 | 8.77%  | 0.8417<br>1  | 23 | 4.96%  | 1.761<br>911 | Mc1r              |
| 77697                            | 3021  | 11 | 14.96% | 1.0225<br>34 | 9  | 13.47% | 0.837<br>556 | Mmab              |
| 69634                            | 1257  | 11 | 33.97% | 2.4574<br>98 | 20 | 47.81% | 4.473<br>185 | Clybl             |
| gi 94410546 ref X<br>M_619451.3  | 1275  | 11 | 26.75% | 2.4228<br>04 | 11 | 20.78% | 2.425<br>519 | -                 |
| 60594                            | 2828  | 11 | 13.47% | 1.0923<br>18 | 16 | 17.15% | 1.590<br>606 | Capn12            |
| 11637                            | 1691  | 11 | 9.52%  | 1.8267<br>74 | 9  | 5.50%  | 1.496<br>308 | Ak2               |
| 14760                            | 2075  | 11 | 16.67% | 1.4887<br>11 | 13 | 23.61% | 1.761<br>357 | Gpr19             |
| 72556                            | 1692  | 11 | 23.23% | 1.8256<br>94 | 6  | 17.38% | 0.996<br>949 | Zfp566            |
| 27401                            | 6196  | 11 | 7.59%  | 0.4985<br>59 | 12 | 8.42%  | 0.544<br>493 | Skp2              |
| 231991                           | 2873  | 11 | 18.76% | 1.0752<br>09 | 5  | 8.53%  | 0.489<br>279 | Creb5             |
| 20356                            | 10809 | 11 | 4.99%  | 0.2857<br>87 | 7  | 2.78%  | 0.182<br>068 | Sema5a            |
| 68001                            | 1163  | 11 | 36.20% | 2.6561<br>26 | 6  | 24.16% | 1.450<br>42  | 1110004<br>E09Rik |
| 211429                           | 3878  | 11 | 10.88% | 0.7965<br>64 | 11 | 12.07% | 0.797<br>456 | Pla2g4b           |
| gi 149259147 ref X<br>M_981877.2 | 3672  | 11 | 5.75%  | 0.8412<br>51 | 11 | 7.03%  | 0.842<br>194 | -                 |
| 229780                           | 3159  | 11 | 14.18% | 0.9778<br>65 | 7  | 10.48% | 0.622<br>975 | Trmt13            |
| 216767                           | 753   | 11 | 30.28% | 4.1023<br>57 | 17 | 51.53% | 6.347<br>111 | Mrpl22            |

|                                     |      |    |        |              |    |        |              |                   |
|-------------------------------------|------|----|--------|--------------|----|--------|--------------|-------------------|
| 1E+08                               | 3236 | 11 | 12.24% | 0.9545<br>97 | 8  | 9.95%  | 0.695<br>03  | Zfp955b           |
| 240261                              | 2818 | 11 | 15.19% | 1.0961<br>94 | 12 | 17.42% | 1.197<br>188 | Ccdc112           |
| 16399                               | 3437 | 11 | 11.90% | 0.8987<br>71 | 6  | 8.55%  | 0.490<br>788 | Itga2b            |
| 20944                               | 610  | 11 | 62.46% | 5.0640<br>57 | -  | -      | -            | Svs5              |
| gi 149250308 ref X<br>M_905642.3    | 3209 | 11 | 2.27%  | 0.9626<br>28 | 17 | 6.11%  | 1.489<br>366 | -                 |
| 67824                               | 1186 | 11 | 27.74% | 2.6046<br>16 | 14 | 37.69% | 3.318<br>681 | Nmral1            |
| 320226                              | 4525 | 11 | 11.91% | 0.6826<br>68 | 15 | 13.88% | 0.931<br>955 | Ccdc171           |
| gi 227497227 ref N<br>M_021567.4    | 2080 | 11 | 20.24% | 1.4851<br>32 | 10 | 20.24% | 1.351<br>633 | -                 |
| 211798                              | 3152 | 11 | 15.55% | 0.9800<br>36 | 2  | 3.11%  | 0.178<br>388 | Mfsd9             |
| gi 149262697 ref X<br>M_001475721.1 | 2812 | 11 | 13.12% | 1.0985<br>33 | 9  | 12.30% | 0.899<br>807 | -                 |
| 106522                              | 2454 | 11 | 10.51% | 1.2587<br>92 | 13 | 15.12% | 1.489<br>33  | Pkdcc             |
| 415115                              | 1156 | 11 | 37.98% | 2.6722<br>1  | 8  | 30.97% | 1.945<br>603 | Neur12            |
| 78779                               | 2380 | 11 | 16.81% | 1.2979<br>31 | 10 | 14.37% | 1.181<br>259 | Spata21           |
| 606735                              | 949  | 11 | 6.11%  | 3.2550<br>84 | 12 | 16.54% | 3.554<br>98  | A330069<br>E16Rik |
| gi 149253692 ref X<br>M_001475371.1 | 8117 | 11 | 4.42%  | 0.3805<br>69 | 4  | 2.01%  | 0.138<br>544 | -                 |
| 320827                              | 6835 | 11 | 7.21%  | 0.4519<br>49 | 8  | 2.97%  | 0.329<br>059 | C530008<br>M17Rik |
| 217325                              | 3557 | 11 | 12.51% | 0.8684<br>49 | 2  | 2.76%  | 0.158<br>077 | Llg12             |
| 434280                              | 5092 | 11 | 4.91%  | 0.6066<br>53 | 12 | 4.65%  | 0.662<br>544 | Gm5607            |
| 54216                               | 7741 | 11 | 4.43%  | 0.3990<br>54 | 10 | 4.43%  | 0.363<br>183 | Pcdh7             |
| 320407                              | 3913 | 11 | 10.96% | 0.7894<br>39 | 9  | 9.17%  | 0.646<br>628 | Klri2             |
| 14866                               | 911  | 11 | 34.36% | 3.3908<br>61 | 8  | 28.65% | 2.468<br>844 | Gstm5             |
| 328277                              | 2998 | 11 | 17.88% | 1.0303<br>78 | 8  | 11.34% | 0.750<br>206 | Gm5085            |

|                                 |      |    |        |              |    |        |              |               |
|---------------------------------|------|----|--------|--------------|----|--------|--------------|---------------|
| 71916                           | 1768 | 11 | 25.45% | 1.7472<br>14 | 14 | 29.58% | 2.226<br>219 | Dus4l         |
| 433036                          | 742  | 11 | 46.63% | 4.1631<br>73 | 2  | 7.14%  | 0.757<br>789 | Gm5488        |
| 27414                           | 1460 | 11 | 29.32% | 2.1158<br>05 | 8  | 21.92% | 1.540<br>491 | Sergef        |
| 11515                           | 4457 | 11 | 12.09% | 0.6930<br>84 | 13 | 12.47% | 0.820<br>017 | Adcy9         |
| 78372                           | 838  | 11 | 45.70% | 3.6862<br>47 | 19 | 69.57% | 6.374<br>288 | Snrnp25       |
| 19016                           | 1857 | 11 | 25.79% | 1.6634<br>76 | 6  | 14.92% | 0.908<br>367 | Pparg         |
| 66789                           | 910  | 11 | 41.43% | 3.3945<br>87 | 21 | 70.55% | 6.487<br>838 | Alg14         |
| gi 254910955 ref NM_025476.5    | 1873 | 11 | 20.82% | 1.6492<br>66 | 18 | 33.96% | 2.701<br>823 | -             |
| 54635                           | 3512 | 11 | 13.21% | 0.8795<br>77 | 5  | 6.15%  | 0.400<br>256 | Pdgfc         |
| 628205                          | 1509 | 11 | 26.84% | 2.0471       | 2  | 6.49%  | 0.372<br>617 | LOC628<br>205 |
| gi 256355136 ref NM_R_015497.1  | 1979 | 11 | 22.39% | 1.5609<br>27 | 25 | 33.10% | 3.551<br>537 | -             |
| 19355                           | 1500 | 11 | 32.67% | 2.0593<br>83 | 22 | 51.80% | 4.123<br>382 | Rad1          |
| gi 170932489 ref NM_153396.2    | 2899 | 11 | 12.59% | 1.0655<br>66 | 4  | 6.76%  | 0.387<br>913 | -             |
| 66398                           | 998  | 10 | 38.78% | 2.8138<br>77 | 8  | 30.86% | 2.253<br>625 | Comm5         |
| 108052                          | 3880 | 10 | 12.63% | 0.7237<br>76 | 3  | 3.79%  | 0.217<br>376 | Slc14a1       |
| 329910                          | 5668 | 10 | 7.34%  | 0.4954<br>57 | 6  | 5.19%  | 0.297<br>607 | Acot11        |
| gi 149274942 ref XM_001471787.1 | 659  | 10 | 17%    | 4.2613<br>8  | 13 | 20.64% | 5.546<br>002 | -             |
| 66401                           | 929  | 10 | 43.49% | 3.0228<br>74 | 12 | 39.40% | 3.631<br>513 | Nudt2         |
| 224481                          | 1360 | 10 | 33.01% | 2.0648<br>89 | 6  | 20.15% | 1.240<br>322 | Tfb1m         |
| 14087                           | 4541 | 10 | 10.75% | 0.6184<br>21 | 6  | 6.47%  | 0.371<br>468 | Fanca         |
| 12228                           | 1389 | 10 | 5.33%  | 2.0217<br>78 | 13 | 5.90%  | 2.631<br>257 | Btg3          |
| 109082                          | 1832 | 10 | 26.75% | 1.5328<br>87 | 7  | 17.90% | 1.074<br>224 | Fbxw17        |



|                                     |       |    |        |              |    |        |              |                   |
|-------------------------------------|-------|----|--------|--------------|----|--------|--------------|-------------------|
| 74931                               | 2125  | 10 | 17.88% | 1.3215<br>29 | 3  | 6.68%  | 0.396<br>903 | 4930481<br>A15Rik |
| 68507                               | 6067  | 10 | 7.42%  | 0.4628<br>73 | 9  | 7.27%  | 0.417<br>052 | Ppfia4            |
| 213211                              | 2294  | 10 | 17.57% | 1.2241<br>72 | 9  | 16.13% | 1.102<br>989 | Rnf26             |
| gi 256223152 ref N<br>M_001164324.1 | 2696  | 10 | 14.76% | 1.0416<br>36 | 10 | 17.36% | 1.042<br>803 | -                 |
| 21819                               | 8462  | 10 | 5.33%  | 0.3318<br>66 | 4  | 2.32%  | 0.132<br>895 | Tg                |
| gi 83921619 ref N<br>M_019756.2     | 1877  | 10 | 22.27% | 1.4961<br>37 | 9  | 21.20% | 1.348<br>032 | -                 |
| 338349                              | 5530  | 10 | 8.86%  | 0.5078<br>21 | 21 | 17.11% | 1.067<br>619 | Cntln             |
| 236266                              | 10005 | 10 | 4.48%  | 0.2806<br>85 | 8  | 3.69%  | 0.224<br>799 | Alms1             |
| 118453                              | 2311  | 10 | 19.47% | 1.2151<br>66 | 12 | 20.99% | 1.459<br>834 | Mmp28             |
| 106564                              | 1440  | 10 | 22.43% | 1.9501<br>73 | 6  | 20.42% | 1.171<br>415 | Ppcs              |
| 22779                               | 9457  | 10 | 5.18%  | 0.2969<br>49 | 4  | 2.07%  | 0.118<br>913 | Ikzf2             |
| 12724                               | 3670  | 10 | 11.36% | 0.7651<br>91 | 5  | 5.34%  | 0.383<br>024 | Clcn2             |
| 244721                              | 2755  | 10 | 12.96% | 1.0193<br>28 | 4  | 7.11%  | 0.408<br>188 | Zfp846            |
| 118446                              | 3515  | 10 | 8.48%  | 0.7989<br>33 | 11 | 7.31%  | 0.879<br>811 | Gjc3              |
| 66531                               | 1440  | 10 | 27.71% | 1.9501<br>73 | 8  | 20.76% | 1.561<br>887 | 2310061<br>C15Rik |
| 66497                               | 1171  | 10 | 36.89% | 2.3981<br>64 | 14 | 50.56% | 3.361<br>192 | 2610528<br>E23Rik |
| gi 156713431 ref N<br>M_027539.4    | 4061  | 10 | 11.20% | 0.6915<br>17 | 3  | 3.62%  | 0.207<br>688 | -                 |
| 320472                              | 6315  | 10 | 7.76%  | 0.4446<br>95 | 8  | 6.21%  | 0.356<br>155 | Ppm1e             |
| 12258                               | 1837  | 10 | 24.01% | 1.5287<br>15 | 2  | 5.33%  | 0.306<br>086 | Serping1          |
| 70729                               | 2973  | 10 | 14.19% | 0.9445<br>84 | 5  | 7.03%  | 0.472<br>821 | Nos1ap            |
| 71492                               | 2598  | 10 | 18.01% | 1.0809<br>27 | 14 | 20.44% | 1.514<br>994 | Bbs7              |
| 224705                              | 2766  | 10 | 10.88% | 1.0152<br>75 | 11 | 12.18% | 1.118<br>054 | Vps52             |

|                                     |      |    |        |              |    |        |              |         |
|-------------------------------------|------|----|--------|--------------|----|--------|--------------|---------|
| 67574                               | 1640 | 10 | 18.23% | 1.7123<br>47 | 12 | 29.15% | 2.057<br>119 | Alg13   |
| 15116                               | 2107 | 10 | 18.13% | 1.3328<br>19 | 34 | 53.63% | 4.536<br>663 | Has1    |
| gi 149274959 ref X<br>M_984041.2    | 492  | 10 | 41.67% | 5.7078<br>24 | 1  | 9.96%  | 0.571<br>422 | -       |
| 11688                               | 3269 | 10 | 4.71%  | 0.8590<br>55 | 7  | 3.40%  | 0.602<br>012 | Alox8   |
| 14525                               | 3364 | 10 | 13.11% | 0.8347<br>95 | 1  | 1.46%  | 0.083<br>573 | Gcsam   |
| 381371                              | 643  | 10 | 50.23% | 4.3674<br>18 | 2  | 15.24% | 0.874<br>462 | Gm1631  |
| 52466                               | 1990 | 10 | 19.45% | 1.4111<br>81 | 5  | 12.31% | 0.706<br>381 | Slc46a1 |
| 12046                               | 444  | 10 | 30.63% | 6.3248<br>87 | 15 | 19.59% | 9.497<br>962 | Bcl2a1c |
| gi 149274694 ref X<br>R_031790.1    | 878  | 10 | 10.71% | 3.1984<br>62 | 5  | 7.74%  | 1.601<br>023 | -       |
| 60530                               | 2974 | 10 | 15.47% | 0.9442<br>67 | 5  | 8.24%  | 0.472<br>663 | Figl1   |
| 217946                              | 2626 | 10 | 15.23% | 1.0694<br>02 | 14 | 24.87% | 1.498<br>841 | Cdca7l  |
| 224440                              | 1827 | 10 | 21.67% | 1.5370<br>82 | 11 | 21.29% | 1.692<br>685 | Setd4   |
| 65105                               | 1182 | 10 | 11.42% | 2.3758<br>46 | 4  | 10.15% | 0.951<br>403 | Arl6ip4 |
| 103743                              | 1444 | 10 | 27.08% | 1.9447<br>71 | 4  | 13.57% | 0.778<br>78  | Tmem98  |
| 74600                               | 899  | 10 | 23.92% | 3.1237<br>48 | 7  | 34.59% | 2.189<br>074 | Mrpl47  |
| 381633                              | 429  | 10 | 48.02% | 6.5460<br>36 | 20 | 64.57% | 13.10<br>674 | Gm1673  |
| 56330                               | 642  | 10 | 38.16% | 4.3742<br>21 | 12 | 21.34% | 5.254<br>947 | Pdcd5   |
| 242409                              | 4787 | 10 | 9.53%  | 0.5866<br>41 | 5  | 5.12%  | 0.293<br>649 | Tmem8b  |
| 280645                              | 4367 | 10 | 8.70%  | 0.6430<br>62 | 7  | 7.60%  | 0.450<br>647 | B3gat2  |
| 67417                               | 1862 | 10 | 16.17% | 1.5081<br>9  | 6  | 12.62% | 0.905<br>928 | Ears2   |
| 18693                               | 2042 | 10 | 20.67% | 1.3752<br>45 | 7  | 13.61% | 0.963<br>75  | Pick1   |
| gi 149274549 ref X<br>M_001472605.1 | 488  | 10 | 36.89% | 5.7546<br>1  | 4  | 20.29% | 2.304<br>423 | -       |

|                                     |      |    |        |              |    |        |              |                   |
|-------------------------------------|------|----|--------|--------------|----|--------|--------------|-------------------|
| 238023                              | 2164 | 10 | 19.22% | 1.2977<br>12 | 8  | 17.98% | 1.039<br>333 | Hexdc             |
| 595136                              | 540  | 10 | 30%    | 5.2004<br>62 | 11 | 21.30% | 5.726<br>919 | Ndufs5            |
| 58251                               | 1993 | 10 | 19.97% | 1.4090<br>57 | 10 | 20.72% | 1.410<br>636 | BC1004<br>51      |
| gi 256355010 ref N<br>R_015553.1    | 3030 | 10 | 14.32% | 0.9268<br>15 | 16 | 20.20% | 1.484<br>566 | -                 |
| gi 149264239 ref X<br>M_001474907.1 | 733  | 10 | 32.74% | 3.8311<br>73 | 10 | 55.25% | 3.835<br>466 | -                 |
| gi 149269447 ref X<br>M_001479881.1 | 426  | 10 | 14.79% | 6.5921<br>35 | 13 | 14.55% | 8.579<br>379 | -                 |
| 213402                              | 4865 | 10 | 9.06%  | 0.5772<br>35 | 7  | 6.91%  | 0.404<br>517 | Armc2             |
| 56213                               | 2051 | 10 | 20.04% | 1.3692<br>1  | 6  | 14.24% | 0.822<br>447 | Htra1             |
| 216188                              | 6030 | 10 | 5.75%  | 0.4657<br>13 | 12 | 8.01%  | 0.559<br>482 | Aldh112           |
| 215257                              | 1647 | 10 | 18.88% | 1.7050<br>7  | 16 | 18.21% | 2.731<br>169 | Il1f9             |
| 22759                               | 2763 | 10 | 15.06% | 1.0163<br>77 | 5  | 5.54%  | 0.508<br>758 | Zfp97             |
| 54219                               | 2209 | 10 | 18.11% | 1.2712<br>76 | 6  | 13.31% | 0.763<br>621 | Cd320             |
| gi 142345660 ref N<br>M_026992.2    | 1189 | 10 | 28.34% | 2.3618<br>58 | 9  | 27.50% | 2.128<br>055 | -                 |
| 68852                               | 2583 | 10 | 16.80% | 1.0872<br>05 | 6  | 10.22% | 0.653<br>054 | Lrrn4c1           |
| 50724                               | 1549 | 10 | 17.75% | 1.8129<br>44 | 6  | 10.78% | 1.088<br>985 | Sap30l            |
| gi 114842408 ref N<br>M_177811.3    | 3321 | 10 | 10.60% | 0.8456<br>04 | 5  | 5.90%  | 0.423<br>276 | -                 |
| 14708                               | 3425 | 10 | 12.41% | 0.8199<br>27 | 11 | 14.74% | 0.902<br>93  | Gng7              |
| 66273                               | 893  | 10 | 34.38% | 3.1447<br>36 | 13 | 50.95% | 4.092<br>739 | 1810020<br>D17Rik |
| 216829                              | 1883 | 10 | 14.50% | 1.4913<br>7  | 9  | 21.77% | 1.343<br>737 | Mmgt2             |
| 76031                               | 1297 | 10 | 22.90% | 2.1651<br>89 | 8  | 24.67% | 1.734<br>092 | 5830448<br>L01Rik |
| 330660                              | 3459 | 10 | 6.59%  | 0.8118<br>67 | 7  | 4.34%  | 0.568<br>944 | Btbd16            |
| 277154                              | 7422 | 10 | 6.60%  | 0.3783<br>68 | 3  | 1.98%  | 0.113<br>638 | Nynrin            |

|                                  |       |    |        |              |    |        |              |             |
|----------------------------------|-------|----|--------|--------------|----|--------|--------------|-------------|
| 15490                            | 4574  | 10 | 9.93%  | 0.6139<br>59 | 6  | 6.43%  | 0.368<br>788 | Hsd17b7     |
| 71703                            | 3385  | 10 | 8.45%  | 0.8296<br>16 | 8  | 7.06%  | 0.664<br>436 | Armcx3      |
| 53627                            | 1896  | 10 | 20.20% | 1.4811<br>44 | 7  | 13.45% | 1.037<br>963 | Porcn       |
| 22691                            | 2302  | 10 | 14.64% | 1.2199<br>17 | 5  | 10.64% | 0.610<br>642 | Zscan2      |
| 59033                            | 11811 | 10 | 3.49%  | 0.2377<br>66 | 6  | 2.04%  | 0.142<br>819 | Slc4a8      |
| 432494                           | 2591  | 10 | 8.07%  | 1.0838<br>48 | 10 | 6.02%  | 1.085<br>062 | Gm5427      |
| 17831                            | 7123  | 10 | 6.88%  | 0.3942<br>51 | 4  | 2.75%  | 0.157<br>877 | Muc2        |
| 68121                            | 2608  | 10 | 15.91% | 1.0767<br>83 | 7  | 9.59%  | 0.754<br>593 | Cep70       |
| 216119                           | 4538  | 10 | 6.77%  | 0.6188<br>3  | 5  | 4.74%  | 0.309<br>762 | Ybey        |
| 66406                            | 1374  | 10 | 34.43% | 2.0438<br>5  | 11 | 29.69% | 2.250<br>754 | Sac3d1      |
| 75565                            | 1174  | 10 | 25.04% | 2.3920<br>35 | 5  | 18.48% | 1.197<br>358 | Ccdc101     |
| 234796                           | 2156  | 10 | 19.43% | 1.3025<br>28 | 8  | 15.49% | 1.043<br>19  | Klhl36      |
| gi 270309115 ref N<br>M_145578.2 | 1192  | 10 | 20.05% | 2.3559<br>14 | 7  | 17.20% | 1.650<br>988 | -           |
| 12322                            | 4966  | 10 | 8.16%  | 0.5654<br>95 | 9  | 8.88%  | 0.509<br>516 | Camk2a      |
| 67305                            | 1214  | 10 | 30.56% | 2.3132<br>2  | 18 | 43.41% | 4.168<br>463 | Gpx7        |
| 627268                           | 2318  | 10 | 18.25% | 1.2114<br>97 | 2  | 4.23%  | 0.242<br>571 | Gm1523<br>2 |
| gi 16905078 ref N<br>M_054044.1  | 5520  | 10 | 8.53%  | 0.5087<br>41 | 2  | 1.78%  | 0.101<br>862 | -           |
| 19212                            | 3620  | 10 | 12.10% | 0.7757<br>6  | 8  | 7.04%  | 0.621<br>303 | Pter        |
| 226154                           | 2825  | 10 | 15.82% | 0.9940<br>71 | 10 | 12.39% | 0.995<br>185 | Lzts2       |
| 76367                            | 4413  | 10 | 10.38% | 0.6363<br>58 | 9  | 7.91%  | 0.573<br>364 | Trp53rk     |
| 73368                            | 4189  | 10 | 10.67% | 0.6703<br>87 | 16 | 15.85% | 1.073<br>821 | Col20a1     |
| 16424                            | 3077  | 10 | 14.69% | 0.9126<br>58 | 5  | 6.76%  | 0.456<br>841 | Itih1       |

|        |      |    |        |              |    |        |              |                   |
|--------|------|----|--------|--------------|----|--------|--------------|-------------------|
| 67694  | 2128 | 10 | 20.72% | 1.3196<br>66 | 9  | 20.72% | 1.189<br>031 | Ift74             |
| 12825  | 5564 | 10 | 7.14%  | 0.5047<br>18 | 1  | 0.88%  | 0.050<br>528 | Col3a1            |
| 73586  | 1128 | 10 | 27.22% | 2.4895<br>83 | 3  | 13.03% | 0.747<br>712 | 1700101<br>C01Rik |
| 212427 | 2214 | 10 | 14.77% | 1.2684<br>05 | 3  | 5.69%  | 0.380<br>948 | A730008<br>H23Rik |
| 68865  | 1165 | 10 | 29.87% | 2.4105<br>15 | 8  | 29.36% | 1.930<br>573 | Arv1              |
| 66340  | 670  | 10 | 21.19% | 4.1914<br>17 | 5  | 16.42% | 2.098<br>057 | Psenen            |
| 75387  | 1645 | 10 | 22.01% | 1.7071<br>43 | 10 | 27.78% | 1.709<br>056 | Sirt4             |
| 666704 | 2071 | 10 | 16.61% | 1.3559<br>87 | 8  | 12.55% | 1.086<br>005 | Samd1             |
| 214254 | 2592 | 10 | 14.81% | 1.0834<br>3  | 11 | 15.24% | 1.193<br>108 | Nudt15            |
| 69309  | 2528 | 10 | 17.37% | 1.1108<br>58 | 8  | 15.19% | 0.889<br>682 | Slc16a13          |
| 66251  | 2618 | 10 | 7.37%  | 1.0726<br>7  | 5  | 6.68%  | 0.536<br>936 | Arfgap3           |
| 170740 | 5021 | 10 | 8.88%  | 0.5593<br>01 | 7  | 5.88%  | 0.391<br>949 | Zfp287            |
| 71738  | 3338 | 10 | 14.14% | 0.8412<br>97 | 4  | 5.87%  | 0.336<br>896 | Mamdc2            |
| 76547  | 1576 | 10 | 24.05% | 1.7818<br>84 | 11 | 32.87% | 1.962<br>269 | Tmem10<br>1       |
| 213027 | 1542 | 10 | 25.49% | 1.8211<br>74 | 8  | 17.51% | 1.458<br>572 | Evi5l             |
| 57266  | 1848 | 10 | 23.59% | 1.5196<br>16 | 23 | 34.04% | 3.499<br>033 | Cxcl14            |
| 17536  | 5010 | 10 | 8.80%  | 0.5605<br>29 | -  | -      | -            | Meis2             |
| 68981  | 1250 | 10 | 14.08% | 2.2466       | 6  | 13.20% | 1.349<br>47  | Snrpa1            |
| 93838  | 3158 | 10 | 8.01%  | 0.8892<br>49 | 7  | 7.22%  | 0.623<br>172 | Dqx1              |
| 677289 | 2245 | 10 | 19.29% | 1.2508<br>91 | 2  | 4.37%  | 0.250<br>458 | Gm1449<br>2       |
| 19804  | 121  | 10 | 48.76% | 23.208<br>67 | 6  | 63.64% | 13.94<br>081 | Rn5s              |
| 217944 | 3987 | 10 | 9.61%  | 0.7043<br>52 | 11 | 11.76% | 0.775<br>655 | Rapgef5           |

|                                     |      |    |        |              |    |        |              |                   |
|-------------------------------------|------|----|--------|--------------|----|--------|--------------|-------------------|
| 241066                              | 2604 | 10 | 18.09% | 1.0784<br>37 | 7  | 12.17% | 0.755<br>752 | Carf              |
| 244233                              | 3454 | 10 | 13.09% | 0.8130<br>43 | 2  | 2.84%  | 0.162<br>791 | Cd16311           |
| 19285                               | 3218 | 10 | 13.92% | 0.8726<br>69 | 4  | 6.09%  | 0.349<br>459 | Ptrf              |
| 625237                              | 1275 | 10 | 29.02% | 2.2025<br>49 | 7  | 19.37% | 1.543<br>512 | Gm6566            |
| 258571                              | 3744 | 10 | 11.38% | 0.7500<br>67 | 9  | 10.18% | 0.675<br>816 | Olfr1033          |
| 625403                              | 2874 | 10 | 5.15%  | 0.9771<br>22 | 9  | 3.44%  | 0.880<br>396 | Gm1399<br>8       |
| 12402                               | 5083 | 10 | 5.98%  | 0.5524<br>79 | 3  | 2.89%  | 0.165<br>929 | Cbl               |
| gi 118130717 ref N<br>M_019478.3    | 1059 | 10 | 14.64% | 2.6517<br>94 | 22 | 15.01% | 5.840<br>484 | -                 |
| gi 149249463 ref X<br>M_001477380.1 | 3424 | 10 | 6.51%  | 0.8201<br>66 | 12 | 6.37%  | 0.985<br>303 | -                 |
| 70615                               | 3658 | 10 | 12.03% | 0.7677<br>01 | 7  | 9.38%  | 0.537<br>993 | Ankrd24           |
| 14299                               | 4036 | 10 | 11.97% | 0.6958       | 17 | 17.39% | 1.184<br>186 | Nes1              |
| gi 149271320 ref X<br>M_001477904.1 | 3519 | 10 | 3.64%  | 0.7980<br>25 | 2  | 1.45%  | 0.159<br>784 | -                 |
| 20677                               | 2969 | 10 | 13.91% | 0.9458<br>57 | 7  | 10.58% | 0.662<br>842 | Sox4              |
| 74393                               | 3548 | 10 | 13.81% | 0.7915<br>02 | 5  | 6.48%  | 0.396<br>195 | 4933403<br>G14Rik |
| 66491                               | 1671 | 10 | 14.18% | 1.6805<br>8  | 14 | 23.28% | 2.355<br>449 | Polr2l            |
| 231659                              | 8546 | 10 | 4.25%  | 0.3286<br>04 | 4  | 2.02%  | 0.131<br>589 | Gen111            |
| 17329                               | 2905 | 10 | 13.87% | 0.9666<br>95 | 3  | 5.06%  | 0.290<br>334 | Cxcl9             |
| 18563                               | 4148 | 10 | 10.87% | 0.6770<br>13 | 9  | 9.26%  | 0.609<br>994 | Pcx               |
| 14256                               | 1075 | 10 | 36.93% | 2.6123<br>25 | 13 | 46.70% | 3.399<br>828 | Flt3l             |
| 170826                              | 3656 | 10 | 12.12% | 0.7681<br>21 | 6  | 8.04%  | 0.461<br>389 | Ppargc1b          |
| 74091                               | 1403 | 10 | 31.58% | 2.0016<br>03 | 9  | 25.80% | 1.803<br>462 | Npl               |
| 54141                               | 3822 | 10 | 12.06% | 0.7347<br>59 | 9  | 10.49% | 0.662<br>024 | Spag5             |

|                                     |      |    |        |              |    |        |              |                   |
|-------------------------------------|------|----|--------|--------------|----|--------|--------------|-------------------|
| 76453                               | 3226 | 10 | 13.27% | 0.8705<br>05 | 3  | 4.56%  | 0.261<br>444 | Prss23            |
| 140781                              | 6054 | 10 | 6.59%  | 0.4638<br>67 | 4  | 3.24%  | 0.185<br>755 | Myh7              |
| 106338                              | 1344 | 10 | 32.29% | 2.0894<br>71 | 4  | 12.87% | 0.836<br>725 | Nsun3             |
| 12363                               | 1433 | 10 | 3.70%  | 1.9597       | 7  | 10.19% | 1.373<br>327 | Casp4             |
| 432555                              | 2971 | 10 | 13.43% | 0.9452<br>2  | 3  | 4.95%  | 0.283<br>884 | Gm5431            |
| gi 149254636 ref X<br>M_001476612.1 | 2254 | 10 | 10.56% | 1.2458<br>96 | 12 | 6.57%  | 1.496<br>751 | -                 |
| 94190                               | 3932 | 10 | 11.93% | 0.7142<br>04 | 8  | 8.72%  | 0.572<br>003 | Ophn1             |
| 13371                               | 5843 | 10 | 7.10%  | 0.4806<br>18 | 2  | 1.68%  | 0.096<br>231 | Dio2              |
| 71995                               | 3378 | 10 | 14.51% | 0.8313<br>35 | 1  | 1.45%  | 0.083<br>227 | Erv3              |
| 270151                              | 3706 | 10 | 12.90% | 0.7577<br>58 | 17 | 18.75% | 1.289<br>631 | Nlr1              |
| 71962                               | 1570 | 10 | 24.71% | 1.7886<br>94 | 19 | 38.85% | 3.402<br>327 | Gatsl3            |
| gi 149249608 ref X<br>M_001481333.1 | 2287 | 10 | 14.12% | 1.2279<br>19 | 9  | 13.73% | 1.106<br>365 | -                 |
| 76633                               | 911  | 10 | 37.87% | 3.0826<br>01 | 12 | 42.26% | 3.703<br>267 | 1700112<br>E06Rik |
| gi 149247817 ref X<br>R_033350.1    | 2575 | 10 | 8.62%  | 1.0905<br>82 | 8  | 4.08%  | 0.873<br>444 | -                 |
| 68073                               | 1166 | 10 | 36.62% | 2.4084<br>47 | 8  | 26.84% | 1.928<br>917 | Fam173b           |
| 70997                               | 2264 | 10 | 16.12% | 1.2403<br>93 | 12 | 15.59% | 1.490<br>14  | Spef1             |
| 217666                              | 3338 | 10 | 13.81% | 0.8412<br>97 | 3  | 4.40%  | 0.252<br>672 | L2hgdh            |
| gi 70778977 ref N<br>M_172921.2     | 2892 | 10 | 16.77% | 0.9710<br>41 | 9  | 13.87% | 0.874<br>916 | -                 |
| 66895                               | 1872 | 10 | 25.91% | 1.5001<br>33 | 15 | 32.53% | 2.252<br>722 | 1300014<br>I06Rik |
| 21665                               | 3218 | 10 | 7.77%  | 0.8726<br>69 | 11 | 9.70%  | 0.961<br>012 | Tdg               |
| 76500                               | 1842 | 10 | 10.21% | 1.5245<br>65 | 5  | 8.31%  | 0.763<br>137 | Ip6k2             |
| 21853                               | 4479 | 10 | 8.75%  | 0.6269<br>81 | 8  | 6.56%  | 0.502<br>147 | Timeless          |

|                                     |      |    |        |              |    |        |              |                   |
|-------------------------------------|------|----|--------|--------------|----|--------|--------------|-------------------|
| 232855                              | 2772 | 10 | 16.99% | 1.0130<br>77 | 8  | 12.91% | 0.811<br>37  | Zfp772            |
| gi 149268575 ref X<br>R_033298.1    | 2017 | 10 | 18.39% | 1.3922<br>9  | 16 | 25.63% | 2.230<br>161 | -                 |
| 269952                              | 3520 | 10 | 11.59% | 0.7977<br>98 | 14 | 13.27% | 1.118<br>169 | D330012<br>F22Rik |
| 14586                               | 3462 | 10 | 11.55% | 0.8111<br>64 | 6  | 6.50%  | 0.487<br>244 | Gfra2             |
| gi 149250305 ref X<br>M_001472555.1 | 2595 | 10 | 11.56% | 1.0821<br>77 | 5  | 6.09%  | 0.541<br>695 | -                 |
| 16924                               | 3098 | 10 | 6.75%  | 0.9064<br>72 | 8  | 7.26%  | 0.725<br>99  | LnX1              |
| 230145                              | 2216 | 10 | 19.40% | 1.2672<br>61 | 12 | 23.60% | 1.522<br>417 | Galnt12           |
| 114642                              | 4710 | 10 | 8.45%  | 0.5962<br>31 | 11 | 10.70% | 0.656<br>589 | Brdt              |
| gi 149252967 ref X<br>M_001475530.1 | 1003 | 10 | 39.48% | 2.7998<br>5  | 15 | 35.89% | 4.204<br>481 | -                 |
| 21834                               | 6083 | 10 | 7.25%  | 0.4616<br>55 | 17 | 13.61% | 0.785<br>694 | Thrb              |
| gi 149274347 ref X<br>M_001472404.1 | 375  | 10 | 56.27% | 7.4886<br>66 | -  | -      | -            | -                 |
| 94227                               | 6946 | 10 | 4.66%  | 0.4042<br>97 | 7  | 3.12%  | 0.283<br>325 | Pi15              |
| 68721                               | 1782 | 10 | 19.47% | 1.5758<br>98 | 4  | 9.48%  | 0.631<br>065 | 1110032<br>A03Rik |
| 110033                              | 2086 | 10 | 18.02% | 1.3462<br>37 | 11 | 21.05% | 1.482<br>52  | Kif22             |
| 18223                               | 2733 | 10 | 15.95% | 1.0275<br>34 | 11 | 14.23% | 1.131<br>554 | Numbl             |
| gi 160333403 ref N<br>M_010395.6    | 1635 | 10 | 17.49% | 1.7175<br>84 | 9  | 16.51% | 1.547<br>558 | -                 |
| 243780                              | 1951 | 10 | 20.91% | 1.4393<br>9  | 5  | 8.05%  | 0.720<br>501 | E330009<br>J07Rik |
| 76238                               | 1253 | 10 | 31.52% | 2.2412<br>21 | 11 | 35.67% | 2.468<br>106 | Grhpr             |
| 72180                               | 3001 | 10 | 15.19% | 0.9357<br>71 | 9  | 12.73% | 0.843<br>138 | Zfp661            |
| 69187                               | 953  | 10 | 32.84% | 2.9467<br>47 | 13 | 49.95% | 3.835<br>064 | Erp27             |
| 665001                              | 946  | 10 | 24.95% | 2.9685<br>51 | 13 | 32.35% | 3.863<br>441 | Gm1439<br>1       |
| 13603                               | 1721 | 10 | 22.60% | 1.6317<br>55 | 11 | 23.77% | 1.796<br>941 | Opn3              |



|                                     |      |   |        |              |    |        |              |                   |
|-------------------------------------|------|---|--------|--------------|----|--------|--------------|-------------------|
| 69069                               | 1473 | 9 | 27.97% | 1.7158<br>35 | 14 | 31.23% | 2.672<br>067 | 1810011<br>H11Rik |
| 54646                               | 3328 | 9 | 12.50% | 0.7594<br>43 | 6  | 7.63%  | 0.506<br>862 | Ppp1r3f           |
| 233826                              | 3747 | 9 | 10.57% | 0.6745<br>2  | 9  | 11.77% | 0.675<br>275 | Palb2             |
| 240068                              | 6383 | 9 | 5.97%  | 0.3959<br>62 | 9  | 5.37%  | 0.396<br>406 | Zfp563            |
| 71790                               | 1895 | 9 | 19.16% | 1.3337<br>33 | 7  | 13.09% | 1.038<br>511 | Anxa9             |
| 58220                               | 3409 | 9 | 11.65% | 0.7413<br>98 | 7  | 8.83%  | 0.577<br>289 | Pard6b            |
| 74761                               | 2280 | 9 | 15.96% | 1.1085<br>2  | 2  | 4.30%  | 0.246<br>614 | Mxra8             |
| 271005                              | 1949 | 9 | 17.75% | 1.2967<br>8  | 3  | 7.54%  | 0.432<br>744 | Klhdc1            |
| 208111                              | 4868 | 9 | 8.50%  | 0.5191<br>92 | 4  | 4.03%  | 0.231<br>01  | 9830147<br>E19Rik |
| 24057                               | 1736 | 9 | 22.93% | 1.4558<br>9  | 7  | 17.57% | 1.133<br>628 | Sh3yl1            |
| 71973                               | 1956 | 9 | 18.10% | 1.2921<br>39 | 9  | 17.18% | 1.293<br>587 | Rbpms2            |
| gi 149274846 ref X<br>M_001472877.1 | 588  | 9 | 37.93% | 4.2983<br>41 | 12 | 22.45% | 5.737<br>544 | -                 |
| 385674                              | 5942 | 9 | 6.92%  | 0.4253<br>49 | 4  | 1.67%  | 0.189<br>256 | Zfp174            |
| gi 149269272 ref X<br>M_001475152.1 | 5069 | 9 | 4.77%  | 0.4986<br>04 | 7  | 4.04%  | 0.388<br>238 | -                 |
| 211914                              | 5686 | 9 | 7.76%  | 0.4445       | 17 | 12.50% | 0.840<br>551 | Asap2             |
| 18140                               | 3583 | 9 | 11.55% | 0.7053<br>93 | 11 | 8.57%  | 0.863<br>114 | Uhrf1             |
| gi 154240709 ref N<br>M_153078.2    | 4821 | 9 | 8.50%  | 0.5242<br>53 | 17 | 15.99% | 0.991<br>366 | -                 |
| 68241                               | 816  | 9 | 43.63% | 3.0973<br>34 | 5  | 30.02% | 1.722<br>669 | Fam195a           |
| 170772                              | 6204 | 9 | 5%     | 0.4073<br>86 | 7  | 3.84%  | 0.317<br>211 | Glecc1            |
| gi 149272082 ref X<br>M_985571.2    | 3262 | 9 | 4.29%  | 0.7748<br>08 | 6  | 3.56%  | 0.517<br>118 | -                 |
| 11657                               | 2043 | 9 | 18.84% | 1.2371<br>14 | 9  | 14.68% | 1.238<br>501 | Alb               |
| 108900                              | 2105 | 9 | 19.81% | 1.2006<br>77 | 5  | 11.64% | 0.667<br>79  | Fam72a            |

|                                     |       |   |        |              |    |        |              |                   |
|-------------------------------------|-------|---|--------|--------------|----|--------|--------------|-------------------|
| 67383                               | 2138  | 9 | 10.10% | 1.1821<br>44 | 11 | 9.82%  | 1.446<br>462 | 2410127<br>L17Rik |
| 22164                               | 1609  | 9 | 20.01% | 1.5708<br>05 | 7  | 18.02% | 1.223<br>106 | Tnfsf4            |
| 72634                               | 2665  | 9 | 13.92% | 0.9483<br>77 | 8  | 13.62% | 0.843<br>946 | Tdrkh             |
| gi 94367775 ref X<br>M_977134.1     | 1395  | 9 | 31.25% | 1.8117<br>74 | 4  | 11.04% | 0.806<br>135 | -                 |
| 76813                               | 2215  | 9 | 16.48% | 1.1410<br>5  | 4  | 8.85%  | 0.507<br>701 | Armc6             |
| 243961                              | 7596  | 9 | 5.16%  | 0.3327<br>31 | 1  | 0.65%  | 0.037<br>012 | Shank1            |
| 99887                               | 6224  | 9 | 7.09%  | 0.4060<br>77 | 11 | 8.52%  | 0.496<br>873 | Tmem56            |
| 228576                              | 1967  | 9 | 18.30% | 1.2849<br>13 | 4  | 8.74%  | 0.571<br>713 | Mall              |
| 191578                              | 3688  | 9 | 10.63% | 0.6853<br>1  | 4  | 5.31%  | 0.304<br>924 | Helq              |
| 666060                              | 4827  | 9 | 9.14%  | 0.5236<br>02 | 2  | 2.03%  | 0.116<br>486 | Frmpd1            |
| 108943                              | 3935  | 9 | 10.90% | 0.6422<br>93 | 10 | 10.44% | 0.714<br>459 | Trmt10a           |
| 595139                              | 6361  | 9 | 6.21%  | 0.3973<br>31 | 25 | 15.67% | 1.104<br>935 | E030024<br>N20Rik |
| 17314                               | 857   | 9 | 42.01% | 2.9491<br>54 | 14 | 55.31% | 4.592<br>713 | Mgmt              |
| 68636                               | 1408  | 9 | 31.32% | 1.7950<br>46 | 7  | 22.80% | 1.397<br>711 | Fahd1             |
| 21677                               | 2115  | 9 | 18.96% | 1.195        | 6  | 11.06% | 0.797<br>559 | Tead2             |
| gi 149256866 ref X<br>R_033175.1    | 2436  | 9 | 6.49%  | 1.0375<br>31 | 9  | 5.38%  | 1.038<br>693 | -                 |
| gi 149258016 ref X<br>M_001478931.1 | 2972  | 9 | 13.49% | 0.8504<br>12 | 2  | 3.30%  | 0.189<br>192 | -                 |
| 69572                               | 2169  | 9 | 18.07% | 1.1652<br>49 | 8  | 15.77% | 1.036<br>937 | Mfsd3             |
| 75847                               | 2709  | 9 | 13.84% | 0.9329<br>73 | 4  | 7.24%  | 0.415<br>119 | Ispd              |
| 66447                               | 635   | 9 | 48.50% | 3.9801<br>96 | 22 | 68.50% | 9.740<br>272 | Mgst3             |
| gi 58331141 ref N<br>M_010741.2     | 862   | 9 | 13.23% | 2.9320<br>47 | 2  | 6.73%  | 0.652<br>296 | -                 |
| 15530                               | 14201 | 9 | 2.84%  | 0.1779<br>75 | 7  | 2.11%  | 0.138<br>58  | Hspg2             |

|                                     |      |   |        |              |    |        |              |                   |
|-------------------------------------|------|---|--------|--------------|----|--------|--------------|-------------------|
| gi 149255602 ref X<br>M_001477017.1 | 426  | 9 | 41.55% | 5.9329<br>22 | 6  | 44.13% | 3.959<br>714 | -                 |
| 245527                              | 4798 | 9 | 8.98%  | 0.5267<br>66 | 5  | 5.11%  | 0.292<br>976 | Eda2r             |
| 382045                              | 2820 | 9 | 14.26% | 0.8962<br>5  | 1  | 1.74%  | 0.099<br>695 | Gpr114            |
| 101700                              | 2389 | 9 | 15.70% | 1.0579<br>43 | 3  | 6.15%  | 0.353<br>043 | Trim68            |
| 257633                              | 2236 | 9 | 16.64% | 1.1303<br>33 | 2  | 4.38%  | 0.251<br>467 | Acsf3             |
| 15354                               | 1656 | 9 | 20.95% | 1.5262<br>23 | 9  | 18.42% | 1.527<br>933 | Hmgb3             |
| 381067                              | 4541 | 9 | 9.69%  | 0.5565<br>79 | 7  | 6.56%  | 0.433<br>38  | Zfp229            |
| gi 149275050 ref X<br>M_001000983.2 | 513  | 9 | 14.62% | 4.9267<br>54 | -  | -      | -            | -                 |
| 1E+08                               | 483  | 9 | 11.39% | 5.2327<br>63 | 8  | 10.77% | 4.656<br>558 | LOC100<br>047372  |
| 208836                              | 4621 | 9 | 7.96%  | 0.5469<br>43 | 18 | 13.14% | 1.095<br>112 | Fanci             |
| 72351                               | 2064 | 9 | 19.14% | 1.2245<br>27 | 10 | 19.43% | 1.362<br>111 | Ptar1             |
| gi 31982698 ref N<br>M_020002.2     | 2132 | 9 | 16.18% | 1.1854<br>71 | 1  | 2.30%  | 0.131<br>867 | -                 |
| 70300                               | 1715 | 9 | 21.11% | 1.4737<br>17 | 13 | 31.72% | 2.131<br>088 | Fuz               |
| 12212                               | 7401 | 9 | 4.88%  | 0.3414<br>98 | 5  | 2.86%  | 0.189<br>934 | Chic1             |
| 15958                               | 3949 | 9 | 9.32%  | 0.6400<br>16 | 5  | 6.20%  | 0.355<br>963 | Ifit2             |
| 66365                               | 1615 | 9 | 22.11% | 1.5649<br>69 | 9  | 20.50% | 1.566<br>723 | Ccdc90b           |
| 208638                              | 1594 | 9 | 18.82% | 1.5855<br>86 | 8  | 18.95% | 1.410<br>99  | Slc25a38          |
| 27205                               | 5330 | 9 | 7.41%  | 0.4741<br>88 | 1  | 0.92%  | 0.052<br>747 | Podxl             |
| 68977                               | 1262 | 9 | 24.48% | 2.0027<br>14 | 7  | 22.58% | 1.559<br>412 | Haghl             |
| gi 149257840 ref X<br>M_001471461.1 | 3097 | 9 | 14.24% | 0.8160<br>88 | 2  | 3.16%  | 0.181<br>556 | -                 |
| 93757                               | 1145 | 9 | 28.65% | 2.2073<br>58 | 1  | 4.28%  | 0.245<br>537 | Immp2l            |
| 104732                              | 3371 | 9 | 13.08% | 0.7497<br>55 | 4  | 4.45%  | 0.333<br>598 | 4930427<br>A07Rik |

|                                  |      |   |        |              |    |        |              |                   |
|----------------------------------|------|---|--------|--------------|----|--------|--------------|-------------------|
| 77036                            | 745  | 9 | 39.87% | 3.3925<br>16 | 8  | 38.66% | 3.018<br>949 | 1700109<br>H08Rik |
| gi 149250529 ref X<br>R_033211.1 | 1857 | 9 | 21.43% | 1.3610<br>26 | 9  | 21.27% | 1.362<br>551 | -                 |
| 217517                           | 4325 | 9 | 8.76%  | 0.5843<br>76 | 10 | 5.64%  | 0.650<br>034 | Stxbp6            |
| 20821                            | 2775 | 9 | 15.89% | 0.9107<br>84 | 5  | 7.39%  | 0.506<br>558 | Trim21            |
| 24099                            | 1710 | 9 | 19.18% | 1.4780<br>26 | 22 | 42.22% | 3.617<br>001 | Tnfsf13b          |
| gi 149270868 ref X<br>R_031486.1 | 2473 | 9 | 10.43% | 1.0220<br>08 | 3  | 4.49%  | 0.341<br>051 | -                 |
| 74359                            | 2585 | 9 | 14.04% | 0.9777<br>27 | 1  | 1.90%  | 0.108<br>758 | 4931414<br>P19Rik |
| 12416                            | 3754 | 9 | 11.75% | 0.6732<br>62 | 1  | 1.31%  | 0.074<br>891 | Cbx2              |
| 19294                            | 2735 | 9 | 14.33% | 0.9241<br>04 | 6  | 7.17%  | 0.616<br>76  | Pvr12             |
| 243547                           | 5143 | 9 | 8.57%  | 0.4914<br>3  | 9  | 8.03%  | 0.491<br>981 | Grip2             |
| 213522                           | 3019 | 9 | 13.38% | 0.8371<br>73 | 8  | 11.39% | 0.744<br>988 | Plekhg6           |
| 16995                            | 1392 | 9 | 27.37% | 1.8156<br>79 | 8  | 17.82% | 1.615<br>745 | Ltb4r1            |
| 71233                            | 1227 | 9 | 26.57% | 2.0598<br>41 | 9  | 26.65% | 2.062<br>149 | Enkur             |
| 622675                           | 7625 | 9 | 5.78%  | 0.3314<br>66 | 5  | 3.21%  | 0.184<br>354 | Zfp827            |
| 110891                           | 4252 | 9 | 9.45%  | 0.5944<br>08 | 18 | 16.20% | 1.190<br>149 | Slc8a2            |
| 22158                            | 3401 | 9 | 11.64% | 0.7431<br>42 | 10 | 11.91% | 0.826<br>638 | Tulp3             |
| 56695                            | 2956 | 9 | 7.27%  | 0.8550<br>15 | 13 | 10.72% | 1.236<br>406 | Pnkd              |
| 69922                            | 1906 | 9 | 15.48% | 1.3260<br>36 | 12 | 17.58% | 1.770<br>029 | Vrk2              |
| 19418                            | 7595 | 9 | 5.81%  | 0.3327<br>75 | 5  | 3.17%  | 0.185<br>082 | Rasgrf2           |
| 67390                            | 1492 | 9 | 27.88% | 1.6939<br>84 | 4  | 13.14% | 0.753<br>726 | Rnmt11            |
| 68875                            | 3439 | 9 | 11.86% | 0.7349<br>3  | 14 | 17.48% | 1.144<br>506 | Tmcc2             |
| 13011                            | 986  | 9 | 28.70% | 2.5633<br>11 | 2  | 9.94%  | 0.570<br>263 | Cst7              |

|                                     |      |   |        |              |    |        |              |                   |
|-------------------------------------|------|---|--------|--------------|----|--------|--------------|-------------------|
| 1E+08                               | 3785 | 9 | 5.50%  | 0.6677<br>48 | 2  | 2.59%  | 0.148<br>555 | Gm4511            |
| 83397                               | 6262 | 9 | 7.04%  | 0.4036<br>13 | 9  | 6.45%  | 0.404<br>065 | Akap12            |
| 57911                               | 2726 | 9 | 10.60% | 0.9271<br>55 | 2  | 3.60%  | 0.206<br>265 | Gsdma             |
| gi 149269416 ref X<br>M_001479122.1 | 3159 | 9 | 9.53%  | 0.8000<br>71 | 1  | 1.55%  | 0.088<br>996 | -                 |
| gi 149267815 ref X<br>R_033217.1    | 2890 | 9 | 8.10%  | 0.8745<br>41 | 4  | 5.99%  | 0.389<br>121 | -                 |
| 207596                              | 8796 | 9 | 4.72%  | 0.2873<br>38 | 21 | 11.16% | 0.671<br>207 | Thsd4             |
| 214424                              | 2483 | 9 | 16.11% | 1.0178<br>92 | 2  | 3.95%  | 0.226<br>452 | Parp16            |
| 101401                              | 6056 | 9 | 6.80%  | 0.4173<br>42 | -  | -      | -            | Adams9            |
| 20667                               | 4436 | 9 | 9.04%  | 0.5697<br>53 | 5  | 5.52%  | 0.316<br>884 | Sox12             |
| 227615                              | 914  | 9 | 31.73% | 2.7652<br>35 | 3  | 12.14% | 0.922<br>778 | Tmem20<br>3       |
| 72401                               | 2539 | 9 | 15.12% | 0.9954<br>41 | 2  | 3.86%  | 0.221<br>457 | Slc43a1           |
| 14370                               | 3346 | 9 | 13.18% | 0.7553<br>57 | 19 | 21.49% | 1.596<br>43  | Fzd8              |
| 329416                              | 1820 | 9 | 22.47% | 1.3886<br>95 | 11 | 26.92% | 1.699<br>196 | Nostrin           |
| 73893                               | 1285 | 9 | 31.44% | 1.9668<br>67 | 3  | 11.44% | 0.656<br>357 | Tmem20<br>2       |
| 432763                              | 1360 | 9 | 26.47% | 1.8584       | 12 | 31.84% | 2.480<br>644 | Prr7              |
| 106389                              | 1903 | 9 | 18.86% | 1.3281<br>26 | 7  | 13.93% | 1.034<br>145 | Eaf2              |
| 208967                              | 3899 | 9 | 10.05% | 0.6482<br>24 | 7  | 6.54%  | 0.504<br>739 | Thns11            |
| 67446                               | 1491 | 9 | 19.79% | 1.6951<br>2  | 8  | 20.05% | 1.508<br>462 | Dusp28            |
| 53886                               | 4022 | 9 | 8.48%  | 0.6284       | 2  | 2.44%  | 0.139<br>801 | Cdkl2             |
| 76306                               | 2837 | 9 | 8.64%  | 0.8908<br>79 | 11 | 8.35%  | 1.090<br>073 | 1110021<br>L09Rik |
| 14732                               | 3852 | 9 | 11.45% | 0.6561<br>33 | 3  | 3.82%  | 0.218<br>956 | Gpam              |
| 104103                              | 1399 | 9 | 21.52% | 1.8065<br>94 | 12 | 31.45% | 2.411<br>491 | Airm              |

|                                 |      |   |        |              |    |        |              |                 |
|---------------------------------|------|---|--------|--------------|----|--------|--------------|-----------------|
| 665976                          | 1689 | 9 | 7.70%  | 1.4964<br>03 | 8  | 8.70%  | 1.331<br>627 | Vmn2r-p<br>s129 |
| 26942                           | 3270 | 9 | 12.94% | 0.7729<br>13 | 12 | 16.06% | 1.031<br>705 | Spag1           |
| 239463                          | 2089 | 9 | 3.02%  | 1.2098<br>73 | 7  | 3.88%  | 0.942<br>067 | Fam83a          |
| gi 124486649 ref NM_001081037.1 | 3414 | 9 | 11.98% | 0.7403<br>12 | 1  | 1.44%  | 0.082<br>349 | -               |
| 27356                           | 660  | 9 | 32.42% | 3.8294<br>31 | 6  | 41.21% | 2.555<br>815 | Insl6           |
| 66977                           | 2405 | 9 | 8.86%  | 1.0509<br>04 | 10 | 8.81%  | 1.168<br>98  | Nuf2            |
| 19362                           | 1835 | 9 | 18.75% | 1.3773<br>43 | 4  | 10.68% | 0.612<br>838 | Rad51ap<br>1    |
| gi 149261404 ref XM_001477963.1 | 1468 | 9 | 7.43%  | 1.7216<br>79 | 2  | 6.68%  | 0.383<br>024 | -               |
| 15901                           | 911  | 9 | 33.70% | 2.7743<br>41 | 20 | 58.62% | 6.172<br>111 | Id1             |
| 269854                          | 1612 | 9 | 23.20% | 1.5678<br>81 | 9  | 25.62% | 1.569<br>638 | Nat14           |
| 18606                           | 3242 | 9 | 11.41% | 0.7795<br>88 | -  | -      | -            | Enpp2           |
| 74253                           | 2282 | 9 | 16.35% | 1.1075<br>48 | 1  | 2.15%  | 0.123<br>199 | Klrg2           |
| gi 149234145 ref XM_001473384.1 | 826  | 9 | 19.98% | 3.0598<br>36 | 6  | 18.28% | 2.042<br>177 | -               |
| 21769                           | 2664 | 9 | 5.74%  | 0.9487<br>33 | 5  | 4.09%  | 0.527<br>665 | Zfand3          |
| 76872                           | 3926 | 9 | 11.23% | 0.6437<br>66 | 9  | 9.32%  | 0.644<br>487 | Ccdc116         |
| 109225                          | 921  | 9 | 29.32% | 2.7442<br>18 | 8  | 34.31% | 2.442<br>038 | Ms4a7           |
| 619734                          | 2358 | 9 | 14.63% | 1.0718<br>51 | 12 | 16.41% | 1.430<br>736 | Gm6096          |
| 66192                           | 760  | 9 | 37.50% | 3.3255<br>59 | 15 | 46.71% | 5.548<br>809 | Lage3           |
| 238276                          | 6685 | 9 | 6.25%  | 0.3780<br>74 | 9  | 5.94%  | 0.378<br>498 | Akap5           |
| 74166                           | 2109 | 9 | 17.64% | 1.1984       | -  | -      | -            | Tmem38<br>a     |
| 68043                           | 836  | 9 | 42.46% | 3.0232<br>35 | 3  | 12.68% | 1.008<br>874 | N6amt2          |
| 71723                           | 3801 | 9 | 6.76%  | 0.6649<br>37 | 7  | 9.02%  | 0.517<br>753 | Dhx34           |

|                                     |      |   |        |              |    |        |              |              |
|-------------------------------------|------|---|--------|--------------|----|--------|--------------|--------------|
| 237211                              | 2984 | 9 | 14.78% | 0.8469<br>92 | 4  | 6.57%  | 0.376<br>863 | Fancb        |
| 69962                               | 1475 | 9 | 22.78% | 1.7135<br>08 | 8  | 22.78% | 1.524<br>825 | Mettl18      |
| 56546                               | 1880 | 9 | 20.48% | 1.3443<br>75 | 6  | 15.64% | 0.897<br>254 | Sec1         |
| 18414                               | 4835 | 9 | 7.18%  | 0.5227<br>35 | 4  | 4.05%  | 0.232<br>587 | Osmr         |
| 67219                               | 1677 | 9 | 26.06% | 1.5071<br>11 | 7  | 20.45% | 1.173<br>511 | Med18        |
| gi 256355150 ref N<br>R_015508.1    | 3786 | 9 | 10.59% | 0.6675<br>71 | 9  | 8.11%  | 0.668<br>319 | -            |
| 14924                               | 7791 | 9 | 5.11%  | 0.3244<br>03 | 8  | 3.84%  | 0.288<br>681 | Magi1        |
| 232685                              | 1691 | 9 | 18.10% | 1.4946<br>33 | 1  | 2.90%  | 0.166<br>256 | AB0418<br>03 |
| 1E+08                               | 2053 | 9 | 10.86% | 1.2310<br>88 | 1  | 2.39%  | 0.136<br>941 | Gm4709       |
| 67900                               | 1396 | 9 | 25.36% | 1.8104<br>76 | 1  | 3.51%  | 0.201<br>389 | Mtfp1        |
| 74478                               | 1205 | 9 | 28.22% | 2.0974<br>48 | 1  | 4.07%  | 0.233<br>311 | Snx29        |
| gi 149263767 ref X<br>M_903476.3    | 492  | 9 | 29.07% | 5.1370<br>42 | 5  | 23.78% | 2.857<br>11  | -            |
| gi 142384938 ref N<br>M_175215.3    | 2898 | 9 | 15.22% | 0.8721<br>27 | 1  | 1.69%  | 0.097<br>012 | -            |
| 213081                              | 4403 | 9 | 9.86%  | 0.5740<br>23 | 5  | 5.56%  | 0.319<br>259 | Wdr19        |
| 52033                               | 1663 | 9 | 20.87% | 1.5197<br>98 | 8  | 19.12% | 1.352<br>446 | Pbk          |
| 76980                               | 2711 | 9 | 13.76% | 0.9322<br>85 | 25 | 33.20% | 2.592<br>583 | Ube2q11      |
| 23802                               | 3694 | 9 | 7.36%  | 0.6841<br>97 | 6  | 5.55%  | 0.456<br>643 | Amfr         |
| 18053                               | 3409 | 9 | 11.73% | 0.7413<br>98 | -  | -      | -            | Ngfr         |
| 74407                               | 2818 | 9 | 15.65% | 0.8968<br>86 | 8  | 11.89% | 0.798<br>125 | Ttc25        |
| 75782                               | 4235 | 9 | 9.92%  | 0.5967<br>94 | 4  | 4.63%  | 0.265<br>539 | Lca5         |
| gi 149265589 ref X<br>M_001478188.1 | 2352 | 9 | 6.72%  | 1.0745<br>85 | 5  | 9.48%  | 0.597<br>661 | -            |
| gi 50355991 ref N<br>M_019985.2     | 1134 | 9 | 29.81% | 2.2287<br>7  | 16 | 45.86% | 3.966<br>697 | -            |

|                              |      |   |        |              |    |        |              |                   |
|------------------------------|------|---|--------|--------------|----|--------|--------------|-------------------|
| 20353                        | 3805 | 9 | 10.88% | 0.6642<br>38 | 20 | 20.37% | 1.477<br>738 | Sema4c            |
| 228019                       | 2370 | 9 | 18.48% | 1.0664<br>24 | 13 | 20.17% | 1.542<br>116 | Mettl8            |
| 21809                        | 3401 | 9 | 12.97% | 0.7431<br>42 | 2  | 2.88%  | 0.165<br>328 | Tgfb3             |
| gi 149234318 ref XR_034434.1 | 1278 | 9 | 12.36% | 1.9776<br>41 | 12 | 14.01% | 2.639<br>809 | -                 |
| 67528                        | 1091 | 9 | 32.36% | 2.3166<br>13 | 3  | 13.47% | 0.773<br>07  | Nudt7             |
| 18600                        | 4758 | 9 | 6.66%  | 0.5311<br>95 | 4  | 3.34%  | 0.236<br>351 | Padi2             |
| 76282                        | 1783 | 9 | 18.56% | 1.4175<br>12 | 1  | 2.75%  | 0.157<br>678 | Gpt               |
| 263764                       | 5799 | 9 | 5.81%  | 0.4358<br>38 | 6  | 3.88%  | 0.290<br>884 | Creg2             |
| 75597                        | 696  | 9 | 56.90% | 3.6313<br>57 | 4  | 21.70% | 1.615<br>745 | Ndufaf2           |
| 20964                        | 3249 | 9 | 9.54%  | 0.7779<br>08 | 9  | 13.08% | 0.778<br>78  | Syn1              |
| 213993                       | 2754 | 9 | 4.90%  | 0.9177<br>29 | 2  | 3.56%  | 0.204<br>168 | A630007<br>B06Rik |
| 22350                        | 3070 | 9 | 2.96%  | 0.8232<br>65 | 4  | 1.89%  | 0.366<br>306 | Ezr               |
| 67088                        | 5453 | 9 | 7.46%  | 0.4634<br>93 | 4  | 3.59%  | 0.206<br>228 | Cand2             |
| 213990                       | 3207 | 9 | 8.86%  | 0.7880<br>96 | 4  | 5.08%  | 0.350<br>658 | Agap3             |
| 23863                        | 1584 | 9 | 16.98% | 1.5955<br>96 | 9  | 25.19% | 1.597<br>384 | Dand5             |
| 12766                        | 1608 | 9 | 23.69% | 1.5717<br>82 | 2  | 6.09%  | 0.349<br>676 | Cxcr3             |
| 140859                       | 2832 | 9 | 15.57% | 0.8924<br>52 | 6  | 10.38% | 0.595<br>635 | Nek8              |
| 399558                       | 7099 | 9 | 5.01%  | 0.3560<br>25 | 14 | 9.66%  | 0.554<br>438 | Flrt2             |
| 18618                        | 848  | 9 | 29.13% | 2.9804<br>54 | 8  | 35.61% | 2.652<br>261 | Pemt              |
| 73668                        | 4472 | 9 | 9.41%  | 0.5651<br>67 | 12 | 8.77%  | 0.754<br>4   | Ttc21b            |
| 15248                        | 4247 | 9 | 9.23%  | 0.5951<br>08 | 3  | 3.46%  | 0.198<br>592 | Hic1              |
| 56792                        | 1136 | 9 | 9.60%  | 2.2248<br>46 | -  | -      | -            | Stap1             |



|                                     |      |   |        |              |    |        |              |                   |
|-------------------------------------|------|---|--------|--------------|----|--------|--------------|-------------------|
| 26357                               | 2493 | 9 | 14.68% | 1.0138<br>09 | 19 | 31.85% | 2.142<br>661 | Abcg2             |
| 381318                              | 2973 | 8 | 9.96%  | 0.7556<br>68 | 5  | 4.98%  | 0.472<br>821 | Nsl1              |
| 331524                              | 2898 | 8 | 10.97% | 0.7752<br>24 | -  | -      | -            | Xkrx              |
| 14297                               | 1095 | 8 | 31.51% | 2.0516<br>89 | 7  | 27.12% | 1.797<br>24  | Fxn               |
| gi 149259268 ref X<br>M_001477914.1 | 1256 | 8 | 7.88%  | 1.7886<br>94 | 9  | 4.14%  | 2.014<br>536 | -                 |
| 85308                               | 805  | 8 | 43.35% | 2.7908<br>07 | 4  | 16.02% | 1.396<br>967 | Emc9              |
| gi 149265182 ref X<br>R_030659.1    | 1475 | 8 | 12.27% | 1.5231<br>18 | 5  | 8.68%  | 0.953<br>016 | -                 |
| 195564                              | 3627 | 8 | 9.57%  | 0.6194<br>1  | 11 | 13.04% | 0.852<br>643 | Skint3            |
| 229675                              | 6727 | 8 | 3.03%  | 0.3339<br>68 | 5  | 1.59%  | 0.208<br>964 | Rsb1              |
| 1E+08                               | 2236 | 8 | 16.19% | 1.0047<br>4  | 6  | 9.26%  | 0.754<br>4   | Gm3052            |
| 209027                              | 2914 | 8 | 7.72%  | 0.7709<br>68 | 5  | 8.41%  | 0.482<br>395 | Pycr1             |
| 433408                              | 1385 | 8 | 18.48% | 1.6220<br>94 | 3  | 10.61% | 0.608<br>967 | Gm1337<br>5       |
| gi 94380878 ref X<br>M_486328.4     | 5301 | 8 | 7.02%  | 0.4238<br>07 | 21 | 13.94% | 1.113<br>739 | -                 |
| 69528                               | 2971 | 8 | 11.71% | 0.7561<br>76 | 3  | 4.95%  | 0.283<br>884 | 1700030<br>J22Rik |
| gi 149265193 ref X<br>M_001472989.1 | 3370 | 8 | 10.18% | 0.6666<br>47 | 7  | 8.19%  | 0.583<br>97  | -                 |
| 66129                               | 972  | 8 | 20.78% | 2.3113<br>17 | 12 | 20.78% | 3.470<br>86  | 1110018<br>J18Rik |
| 50997                               | 4142 | 8 | 8.93%  | 0.5423<br>95 | 11 | 11.15% | 0.746<br>629 | Mpp2              |
| 211253                              | 1862 | 8 | 19.17% | 1.2065<br>52 | 8  | 21.05% | 1.207<br>904 | Mtrf1             |
| gi 162417964 ref N<br>M_011210.3    | 5247 | 8 | 1.30%  | 0.4281<br>68 | 3  | 1.47%  | 0.160<br>743 | -                 |
| gi 149275188 ref X<br>M_001480556.1 | 1065 | 8 | 21.69% | 2.1094<br>83 | 4  | 14.46% | 1.055<br>924 | -                 |
| 226970                              | 2738 | 8 | 10.74% | 0.8205<br>26 | 6  | 8.95%  | 0.616<br>084 | Arhgef4           |
| 29861                               | 2278 | 8 | 17.21% | 0.9862<br>16 | 1  | 2.15%  | 0.123<br>415 | Dpf1              |

|                                  |      |   |        |              |    |        |              |                   |
|----------------------------------|------|---|--------|--------------|----|--------|--------------|-------------------|
| 18816                            | 2199 | 8 | 16.87% | 1.0216<br>46 | 9  | 15.37% | 1.150<br>64  | Serpinf2          |
| 20523                            | 1774 | 8 | 19.50% | 1.2664<br>03 | 6  | 15.16% | 0.950<br>867 | Slc25a14          |
| 242570                           | 4006 | 8 | 8.59%  | 0.5608<br>09 | 6  | 6.14%  | 0.421<br>078 | Raver2            |
| 15450                            | 1934 | 8 | 20.27% | 1.1616<br>34 | 4  | 10.13% | 0.581<br>468 | Lipc              |
| gi 94372765 ref X<br>M_357412.3  | 4620 | 8 | 8.46%  | 0.4862<br>77 | 12 | 9.03%  | 0.730<br>233 | -                 |
| 69430                            | 1908 | 8 | 16.04% | 1.1774<br>63 | 5  | 5.92%  | 0.736<br>739 | 1700048<br>O20Rik |
| 233529                           | 2351 | 8 | 16.21% | 0.9555<br>93 | 5  | 9.27%  | 0.597<br>915 | Kctd14            |
| 68472                            | 890  | 8 | 32.58% | 2.5242<br>69 | 6  | 27.42% | 1.895<br>324 | Tmem12<br>6b      |
| gi 142383593 ref N<br>M_029096.2 | 1548 | 8 | 21.51% | 1.4512<br>92 | 6  | 16.15% | 1.089<br>689 | -                 |
| 71336                            | 1047 | 8 | 35.91% | 2.1457<br>49 | 5  | 19.58% | 1.342<br>596 | Rbks              |
| 18286                            | 3921 | 8 | 6.12%  | 0.5729<br>66 | 3  | 2.75%  | 0.215<br>103 | Odf2              |
| 227683                           | 1987 | 8 | 15.80% | 1.1306<br>49 | 10 | 17.36% | 1.414<br>895 | Coq4              |
| 70551                            | 3390 | 8 | 10.12% | 0.6627<br>14 | 10 | 13.01% | 0.829<br>321 | Tmtc4             |
| 245020                           | 1596 | 8 | 24.56% | 1.4076<br>44 | 7  | 19.30% | 1.233<br>069 | Tmem22            |
| 72555                            | 4844 | 8 | 6.07%  | 0.4637<br>9  | -  | -      | -            | Shisa9            |
| gi 256355074 ref N<br>R_015618.1 | 800  | 8 | 34.63% | 2.8082<br>5  | 3  | 18.25% | 1.054<br>274 | -                 |
| 73166                            | 1496 | 8 | 25.67% | 1.5017<br>38 | 6  | 17.91% | 1.127<br>565 | Tm7sf2            |
| 72844                            | 1574 | 8 | 24.90% | 1.4273<br>19 | 5  | 10.48% | 0.893<br>074 | Kctd17            |
| 19416                            | 1609 | 8 | 19.76% | 1.3962<br>71 | 2  | 6.09%  | 0.349<br>459 | Rasd1             |
| 83771                            | 3514 | 8 | 8.48%  | 0.6393<br>28 | 6  | 7.09%  | 0.480<br>034 | Tas1r3            |
| 216148                           | 3974 | 8 | 9.08%  | 0.5653<br>25 | 8  | 9.03%  | 0.565<br>958 | Shc2              |
| 53310                            | 4996 | 8 | 7.85%  | 0.4496<br>8  | 6  | 5.58%  | 0.337<br>638 | Dlg3              |

|                                     |      |   |        |              |    |        |              |              |
|-------------------------------------|------|---|--------|--------------|----|--------|--------------|--------------|
| 68051                               | 1966 | 8 | 14.55% | 1.1427<br>26 | 7  | 14.19% | 1.001<br>006 | Nutf2        |
| 74007                               | 5808 | 8 | 6.75%  | 0.3868<br>11 | 3  | 2.53%  | 0.145<br>217 | Btbd11       |
| gi 149261686 ref X<br>M_484000.4    | 3434 | 8 | 3.87%  | 0.6542<br>22 | 1  | 1.43%  | 0.081<br>869 | -            |
| gi 149261259 ref X<br>M_001474215.1 | 1667 | 8 | 22.56% | 1.3476<br>9  | 5  | 12%    | 0.843<br>25  | -            |
| 228421                              | 3487 | 8 | 10.90% | 0.6442<br>79 | 6  | 8%     | 0.483<br>75  | Kif18a       |
| gi 158508648 ref N<br>M_029842.4    | 2379 | 8 | 16.48% | 0.9443<br>46 | 2  | 4.12%  | 0.236<br>351 | -            |
| 116872                              | 1894 | 8 | 17.37% | 1.1861<br>67 | 7  | 17.11% | 1.039<br>059 | Serpib7      |
| 242864                              | 3673 | 8 | 9.34%  | 0.6116<br>53 | 4  | 5.34%  | 0.306<br>169 | Napepld      |
| 233870                              | 1806 | 8 | 9.91%  | 1.2439<br>64 | 14 | 17.22% | 2.179<br>377 | Tufm         |
| 18400                               | 1560 | 8 | 23.27% | 1.4401<br>28 | 8  | 21.99% | 1.441<br>742 | Slc22a18     |
| 66658                               | 2397 | 8 | 14.48% | 0.9372<br>55 | 6  | 10.68% | 0.703<br>729 | Ccdc51       |
| 70673                               | 8605 | 8 | 4.56%  | 0.2610<br>81 | 4  | 2.28%  | 0.130<br>687 | Prdm16       |
| 14739                               | 2815 | 8 | 13.04% | 0.7980<br>82 | 6  | 10.44% | 0.599<br>232 | S1pr2        |
| 11989                               | 2371 | 8 | 16.20% | 0.9475<br>33 | 8  | 13.67% | 0.948<br>594 | Slc7a3       |
| 56753                               | 1764 | 8 | 20.41% | 1.2735<br>83 | 2  | 5.56%  | 0.318<br>752 | Tacstd2      |
| 276829                              | 2624 | 8 | 6.36%  | 0.8561<br>74 | 4  | 4.46%  | 0.428<br>567 | Smtm12       |
| 239839                              | 4107 | 8 | 9.54%  | 0.5470<br>17 | 8  | 9.50%  | 0.547<br>63  | Ccdc14       |
| 19893                               | 3680 | 8 | 9.32%  | 0.6104<br>89 | 7  | 7.93%  | 0.534<br>777 | Rpgr         |
| 239096                              | 2728 | 8 | 14.37% | 0.8235<br>34 | 6  | 10.78% | 0.618<br>342 | Cdh24        |
| 100382                              | 2745 | 8 | 14.03% | 0.8184<br>33 | 8  | 14.17% | 0.819<br>351 | AW0117<br>38 |
| 434179                              | 3166 | 8 | 11.72% | 0.7096<br>02 | 4  | 6.19%  | 0.355<br>199 | Gm5595       |
| 17864                               | 3564 | 8 | 11%    | 0.6303<br>59 | 7  | 9.01%  | 0.552<br>182 | Mybl1        |

|                                     |      |   |        |              |    |        |              |                   |
|-------------------------------------|------|---|--------|--------------|----|--------|--------------|-------------------|
| 242608                              | 3177 | 8 | 3.62%  | 0.7071<br>45 | -  | -      | -            | Podn              |
| 56075                               | 1638 | 8 | 20.76% | 1.3715<br>5  | 8  | 21.73% | 1.373<br>087 | Pdss1             |
| 56089                               | 1221 | 8 | 6.22%  | 1.8399<br>67 | 5  | 7.53%  | 1.151<br>268 | Ramp3             |
| 231997                              | 2714 | 8 | 14.44% | 0.8277<br>82 | 10 | 18.05% | 1.035<br>887 | Fkbp14            |
| 243833                              | 3850 | 8 | 9.06%  | 0.5835<br>32 | 1  | 1.27%  | 0.073<br>023 | Zfp128            |
| gi 149274986 ref X<br>M_001480796.1 | 4174 | 8 | 3.43%  | 0.5382<br>37 | 2  | 2.35%  | 0.134<br>71  | -                 |
| 320946                              | 3533 | 8 | 11.10% | 0.6358<br>9  | 7  | 8.55%  | 0.557<br>027 | A930035<br>D04Rik |
| 84544                               | 2203 | 8 | 13.39% | 1.0197<br>91 | 1  | 2.22%  | 0.127<br>617 | Cd96              |
| 629016                              | 4641 | 8 | 7.30%  | 0.4840<br>77 | 3  | 3.17%  | 0.181<br>732 | Zfp953            |
| gi 58037276 ref N<br>M_028110.1     | 2068 | 8 | 11.17% | 1.0863<br>63 | -  | -      | -            | -                 |
| 71132                               | 2125 | 8 | 13.93% | 1.0572<br>23 | 9  | 19.34% | 1.190<br>709 | Cabyr             |
| 16992                               | 1423 | 8 | 24.17% | 1.5787<br>77 | 5  | 17.22% | 0.987<br>841 | Lta               |
| 215493                              | 3390 | 8 | 11.56% | 0.6627<br>14 | 9  | 10.77% | 0.746<br>388 | A3galt2           |
| 233836                              | 2341 | 8 | 12.30% | 0.9596<br>75 | 1  | 2.09%  | 0.120<br>094 | Slc5a11           |
| 72350                               | 4482 | 8 | 8.08%  | 0.5012<br>49 | 4  | 4.37%  | 0.250<br>906 | Fam164c           |
| gi 149257633 ref X<br>R_032873.1    | 3107 | 8 | 5.57%  | 0.7230<br>77 | 10 | 11.23% | 0.904<br>859 | -                 |
| 268451                              | 3145 | 8 | 12.46% | 0.7143<br>4  | 2  | 3.12%  | 0.178<br>785 | Rab11fip<br>4     |
| 239546                              | 2318 | 8 | 16.31% | 0.9691<br>97 | 4  | 8.15%  | 0.485<br>142 | Zfp647            |
| 12500                               | 1330 | 8 | 22.33% | 1.6891<br>73 | 1  | 3.68%  | 0.211<br>383 | Cd3d              |
| 67892                               | 780  | 8 | 31.54% | 2.8802<br>56 | 7  | 35%    | 2.523<br>048 | 1810063<br>B05Rik |
| 66994                               | 1701 | 8 | 18.87% | 1.3207<br>52 | 11 | 20.81% | 1.818<br>07  | Cep19             |
| 620913                              | 5264 | 8 | 5.47%  | 0.4267<br>86 | 11 | 5.53%  | 0.587<br>488 | Gm1218<br>5       |

|                                     |      |   |        |              |    |        |              |                   |
|-------------------------------------|------|---|--------|--------------|----|--------|--------------|-------------------|
| 52372                               | 2227 | 8 | 15.40% | 1.0088<br>01 | 5  | 8.85%  | 0.631<br>207 | D6ErtD5<br>27e    |
| 18726                               | 2424 | 8 | 4.04%  | 0.9268<br>15 | 10 | 14.15% | 1.159<br>817 | Lilra6            |
| 667023                              | 810  | 8 | 25.68% | 2.7735<br>8  | 5  | 12.35% | 1.735<br>43  | Gm8425            |
| 73016                               | 2135 | 8 | 6.60%  | 1.0522<br>72 | 10 | 9.27%  | 1.316<br>813 | Kremen2           |
| 100647                              | 2036 | 8 | 18.32% | 1.1034<br>38 | 1  | 2.41%  | 0.138<br>084 | Upk3b             |
| gi 149241112 ref X<br>M_001479630.1 | 6711 | 8 | 2.53%  | 0.3347<br>64 | 3  | 0.77%  | 0.125<br>677 | -                 |
| 449522                              | 3705 | 8 | 6.64%  | 0.6063<br>7  | 14 | 14.41% | 1.062<br>336 | E130314<br>M14Rik |
| 57916                               | 750  | 8 | 45.60% | 2.9954<br>66 | 5  | 16.13% | 1.874<br>264 | Tnfrsf13<br>b     |
| 69408                               | 1026 | 8 | 31.68% | 2.1896<br>68 | 11 | 43.08% | 3.014<br>168 | Dnajc17           |
| 72096                               | 1097 | 8 | 22.24% | 2.0479<br>49 | 13 | 49.04% | 3.331<br>646 | Mettl10           |
| gi 94390707 ref X<br>M_990990.1     | 1596 | 8 | 21.12% | 1.4076<br>44 | 15 | 27.57% | 2.642<br>29  | -                 |
| 212712                              | 5299 | 8 | 7.10%  | 0.4239<br>67 | 9  | 7.93%  | 0.477<br>497 | Satb2             |
| 74356                               | 3571 | 8 | 9.61%  | 0.6291<br>23 | 1  | 1.37%  | 0.078<br>729 | 4931428<br>F04Rik |
| 19331                               | 1371 | 8 | 24.07% | 1.6386<br>58 | 5  | 17.43% | 1.025<br>309 | Rab19             |
| gi 149261422 ref X<br>M_001478511.1 | 1096 | 8 | 25.18% | 2.0498<br>17 | 9  | 22.26% | 2.308<br>629 | -                 |
| 72371                               | 4950 | 8 | 6.73%  | 0.4538<br>59 | 4  | 3.96%  | 0.227<br>184 | 2210408<br>I21Rik |
| 67733                               | 2738 | 8 | 7.82%  | 0.8205<br>26 | 8  | 13.73% | 0.821<br>445 | Itgb3bp           |
| 320705                              | 2318 | 8 | 15.57% | 0.9691<br>97 | 13 | 23.64% | 1.576<br>711 | Bend6             |
| 20419                               | 2244 | 8 | 16%    | 1.0011<br>59 | 9  | 19.34% | 1.127<br>565 | Shcbp1            |
| gi 149246426 ref X<br>M_001472240.1 | 1158 | 8 | 14.08% | 1.9400<br>69 | 12 | 19.52% | 2.913<br>364 | -                 |
| 241112                              | 2101 | 8 | 15.85% | 1.0693       | 5  | 9.19%  | 0.669<br>062 | Gm216             |
| 75475                               | 3970 | 8 | 9.87%  | 0.5658<br>94 | 4  | 4.94%  | 0.283<br>264 | Oplah             |

|                              |       |   |        |              |    |        |              |                   |
|------------------------------|-------|---|--------|--------------|----|--------|--------------|-------------------|
| 245555                       | 10891 | 8 | 3.19%  | 0.2062<br>8  | 2  | 0.90%  | 0.051<br>628 | C77370            |
| gi 6806904 ref NM_009854.1   | 978   | 8 | 38.55% | 2.2971<br>37 | 1  | 5.01%  | 0.287<br>464 | -                 |
| 75723                        | 8951  | 8 | 2.75%  | 0.2509<br>89 | 10 | 2.93%  | 0.314<br>087 | Amod1             |
| 21389                        | 1731  | 8 | 17.39% | 1.2978<br>62 | 8  | 20.85% | 1.299<br>317 | Tbx6              |
| 66847                        | 696   | 8 | 47.56% | 3.2278<br>73 | 7  | 32.47% | 2.827<br>554 | Hint3             |
| 56794                        | 2618  | 8 | 13.41% | 0.8581<br>36 | 8  | 11.34% | 0.859<br>098 | Hac11             |
| gi 149266296 ref XR_004776.2 | 4674  | 8 | 2.25%  | 0.4806<br>59 | 7  | 3.12%  | 0.421<br>048 | -                 |
| 230597                       | 2170  | 8 | 15.90% | 1.0352<br>99 | 8  | 14.79% | 1.036<br>46  | Zfyve9            |
| gi 94372065 ref XR_004941.1  | 2933  | 8 | 2.93%  | 0.7659<br>73 | 8  | 1.70%  | 0.766<br>832 | -                 |
| 68002                        | 675   | 8 | 35.41% | 3.3282<br>96 | 15 | 69.93% | 6.247<br>548 | 1110058<br>L19Rik |
| 15410                        | 3390  | 8 | 9.41%  | 0.6627<br>14 | 2  | 2.89%  | 0.165<br>864 | Hoxb3             |
| 18111                        | 1223  | 8 | 31.81% | 1.8369<br>58 | 8  | 28.05% | 1.839<br>017 | Nnat              |
| gi 149274210 ref XM_486348.4 | 579   | 8 | 27.12% | 3.8801<br>38 | 18 | 28.32% | 8.740<br>093 | -                 |
| 52028                        | 5646  | 8 | 5.12%  | 0.3979<br>1  | 5  | 3.49%  | 0.248<br>972 | Bbs1              |
| 170829                       | 1393  | 8 | 26.63% | 1.6127<br>78 | 4  | 14.07% | 0.807<br>293 | Tram2             |
| 224912                       | 1160  | 8 | 28.79% | 1.9367<br>24 | 1  | 4.22%  | 0.242<br>362 | Crb3              |
| 77505                        | 9794  | 8 | 4%     | 0.2293<br>85 | 5  | 2.38%  | 0.143<br>526 | Dnhd1             |
| 76123                        | 3510  | 8 | 11.17% | 0.6400<br>57 | 10 | 13.96% | 0.800<br>968 | Gpsm2             |
| 269423                       | 2492  | 8 | 13.92% | 0.9015<br>25 | 3  | 3.97%  | 0.338<br>451 | 3110057<br>O12Rik |
| 22276                        | 1811  | 8 | 17.34% | 1.2405<br>3  | 6  | 15.07% | 0.931<br>44  | Uros              |
| 110417                       | 2376  | 8 | 12.88% | 0.9455<br>39 | 10 | 13.43% | 1.183<br>248 | Pigh              |
| 67101                        | 801   | 8 | 43.07% | 2.8047<br>44 | 1  | 6.12%  | 0.350<br>986 | 2310039<br>H08Rik |

|                                     |      |   |        |              |    |        |              |                   |
|-------------------------------------|------|---|--------|--------------|----|--------|--------------|-------------------|
| gi 149259400 ref X<br>M_001471978.1 | 1187 | 8 | 22.33% | 1.8926<br>7  | 6  | 16.09% | 1.421<br>093 | -                 |
| gi 149263145 ref X<br>M_001479036.1 | 1810 | 8 | 14.03% | 1.2412<br>15 | 6  | 7.24%  | 0.931<br>955 | -                 |
| 266614                              | 1056 | 8 | 25.19% | 2.1274<br>62 | 7  | 24.81% | 1.863<br>615 | Ly6g5b            |
| 50722                               | 903  | 8 | 37.87% | 2.4879<br>29 | 5  | 22.92% | 1.556<br>698 | Dkk11             |
| 381549                              | 2381 | 8 | 16.46% | 0.9435<br>53 | 14 | 24.15% | 1.653<br>068 | Zfp69             |
| 55990                               | 3336 | 8 | 10.37% | 0.6734<br>41 | -  | -      | -            | Fmo2              |
| 107771                              | 861  | 8 | 39.95% | 2.6092<br>91 | 2  | 11.38% | 0.653<br>054 | Bmyc              |
| 72287                               | 1559 | 8 | 22.19% | 1.4410<br>52 | 8  | 17.06% | 1.442<br>667 | Plekhf1           |
| 244698                              | 5261 | 8 | 7.45%  | 0.4270<br>29 | 3  | 2.79%  | 0.160<br>315 | Heph11            |
| 66343                               | 3302 | 8 | 11.87% | 0.6803<br>75 | 6  | 7.69%  | 0.510<br>853 | Tmem17<br>7       |
| 232854                              | 2700 | 8 | 14.04% | 0.8320<br>74 | 4  | 7.26%  | 0.416<br>503 | Zfp418            |
| 238988                              | 6083 | 8 | 6.44%  | 0.3693<br>24 | 19 | 13.92% | 0.878<br>128 | Erc2              |
| 74190                               | 2943 | 8 | 9.99%  | 0.7633<br>71 | 7  | 7.10%  | 0.668<br>698 | Exoc3l4           |
| 240518                              | 1937 | 8 | 20.19% | 1.1598<br>35 | 9  | 19.15% | 1.306<br>276 | Peli3             |
| 68554                               | 1513 | 8 | 19.63% | 1.4848<br>64 | 16 | 31.66% | 2.973<br>057 | 1110001<br>A16Rik |
| 234911                              | 1656 | 8 | 23.01% | 1.3566<br>42 | 3  | 8.88%  | 0.509<br>311 | Mmp27             |
| 71870                               | 1822 | 8 | 17.45% | 1.2330<br>4  | 4  | 10.65% | 0.617<br>211 | Ccdc19            |
| 269941                              | 4176 | 8 | 5.63%  | 0.5379<br>79 | 4  | 4.69%  | 0.269<br>291 | Chsy1             |
| 319653                              | 2795 | 8 | 10.30% | 0.8037<br>92 | 7  | 7.26%  | 0.704<br>106 | Slc25a40          |
| gi 149252148 ref X<br>M_991890.2    | 3438 | 8 | 2.36%  | 0.6534<br>61 | 14 | 3.81%  | 1.144<br>839 | -                 |
| 80782                               | 2212 | 8 | 17.36% | 1.0156<br>42 | 7  | 10.94% | 0.889<br>682 | Klrb1b            |
| 66603                               | 1106 | 8 | 33%    | 2.0312<br>84 | 8  | 29.20% | 2.033<br>56  | Sip1              |

|                                  |       |   |        |              |    |        |              |                    |
|----------------------------------|-------|---|--------|--------------|----|--------|--------------|--------------------|
| gi 94383826 ref X<br>M_489247.4  | 2255  | 8 | 13.57% | 0.9962<br>75 | 11 | 12.46% | 1.371<br>413 | -                  |
| 68347                            | 825   | 8 | 32.12% | 2.7231<br>51 | 13 | 51.64% | 4.430<br>08  | 0610011<br>F06Rik  |
| 328330                           | 4263  | 8 | 7.32%  | 0.527        | 8  | 9.20%  | 0.527<br>59  | D130037<br>M23Rik  |
| 26909                            | 5506  | 8 | 7.12%  | 0.4080<br>28 | 5  | 4.45%  | 0.255<br>303 | Exo1               |
| 73139                            | 1044  | 8 | 28.16% | 2.1519<br>15 | 8  | 27.01% | 2.154<br>327 | Cenpv              |
| gi 293629273 ref N<br>M_153581.5 | 3337  | 8 | 10.37% | 0.6732<br>39 | 1  | 1.47%  | 0.084<br>249 | -                  |
| 73047                            | 1299  | 8 | 20.71% | 1.7294<br>84 | 6  | 20.48% | 1.298<br>567 | Camk2n<br>2        |
| 72852                            | 3881  | 8 | 7.99%  | 0.5788<br>71 | 3  | 3.79%  | 0.217<br>32  | Mblac2             |
| gi 270288747 ref N<br>M_183115.4 | 2754  | 8 | 8.21%  | 0.8157<br>59 | 2  | 3.56%  | 0.204<br>168 | -                  |
| gi 149270115 ref X<br>M_923819.2 | 6112  | 8 | 6.41%  | 0.3675<br>72 | 5  | 4.01%  | 0.229<br>99  | -                  |
| 30963                            | 1015  | 8 | 19.11% | 2.2133<br>99 | 13 | 40%    | 3.600<br>804 | Ptpla              |
| 19250                            | 10766 | 8 | 3.64%  | 0.2086<br>75 | -  | -      | -            | Ptpn14             |
| gi 189491670 ref N<br>M_172493.1 | 3805  | 8 | 5.65%  | 0.5904<br>34 | 4  | 4.76%  | 0.295<br>548 | -                  |
| 245240                           | 2403  | 8 | 13.77% | 0.9349<br>15 | 2  | 4.08%  | 0.233<br>991 | 9930111<br>J21Rik2 |
| 69727                            | 3225  | 8 | 12.16% | 0.6966<br>2  | 7  | 10.64% | 0.610<br>226 | Usp46              |
| 16819                            | 853   | 8 | 35.05% | 2.6337<br>63 | 16 | 49.47% | 5.273<br>429 | Lcn2               |
| 18675                            | 6265  | 8 | 3.29%  | 0.3585<br>95 | 13 | 2.08%  | 0.583<br>37  | Phex               |
| 1E+08                            | 2351  | 8 | 10.25% | 0.9555<br>93 | 12 | 9.36%  | 1.434<br>996 | Gm4078             |
| 78473                            | 2190  | 8 | 11.87% | 1.0258<br>45 | -  | -      | -            | Skap1              |
| 20438                            | 1713  | 8 | 19.73% | 1.3115       | 13 | 31.87% | 2.133<br>576 | Siah1b             |
| 17130                            | 2971  | 8 | 11.85% | 0.7561<br>76 | 13 | 18.92% | 1.230<br>163 | Smad6              |
| 66566                            | 1155  | 8 | 28.40% | 1.9451<br>08 | 15 | 42.34% | 3.651<br>164 | Ntper              |



|                                     |      |   |        |              |    |        |              |                   |
|-------------------------------------|------|---|--------|--------------|----|--------|--------------|-------------------|
| 237411                              | 2031 | 8 | 17.97% | 1.1061<br>54 | 7  | 14.92% | 0.968<br>97  | Zfp938            |
| 75766                               | 1993 | 8 | 17.21% | 1.1272<br>45 | 16 | 36.58% | 2.257<br>017 | Destamp           |
| 1E+08                               | 1913 | 8 | 7.84%  | 1.1743<br>86 | 4  | 2.82%  | 0.587<br>851 | A630075<br>F10Rik |
| 673160                              | 1104 | 8 | 19.47% | 2.0349<br>63 | 3  | 6.25%  | 0.763<br>966 | Gm9590            |
| 330483                              | 1635 | 8 | 21.71% | 1.3740<br>67 | 8  | 12.11% | 1.375<br>607 | Ceacam1<br>6      |
| 117592                              | 3213 | 8 | 12.20% | 0.6992<br>22 | 7  | 10.68% | 0.612<br>505 | B3galt6           |
| gi 149274567 ref X<br>M_001478139.1 | 852  | 8 | 14.08% | 2.6368<br>54 | 10 | 15.02% | 3.299<br>761 | -                 |
| 13800                               | 4276 | 8 | 7.02%  | 0.5253<br>97 | 9  | 8.51%  | 0.591<br>735 | Enah              |
| 672646                              | 4718 | 8 | 8.31%  | 0.4761<br>76 | 6  | 6.23%  | 0.357<br>532 | Gm9571            |
| 75284                               | 1271 | 8 | 29.11% | 1.7675<br>84 | 12 | 32.57% | 2.654<br>348 | Bcdin3d           |
| 52850                               | 3825 | 8 | 2.25%  | 0.5873<br>46 | 3  | 1.62%  | 0.220<br>502 | Sgsm1             |
| 210757                              | 3981 | 8 | 8.69%  | 0.5643<br>3  | -  | -      | -            | Themis            |
| gi 198278436 ref N<br>M_133885.3    | 3310 | 8 | 7.85%  | 0.6787<br>31 | 9  | 7.19%  | 0.764<br>428 | -                 |
| 21378                               | 7979 | 8 | 3.17%  | 0.2815<br>64 | 9  | 4.21%  | 0.317<br>115 | Tbrg3             |
| 109685                              | 1830 | 8 | 15.03% | 1.2276<br>5  | 13 | 9.29%  | 1.997<br>167 | Hyal3             |
| 1E+08                               | 1429 | 8 | 22.88% | 1.5721<br>48 | 5  | 16.93% | 0.983<br>694 | Gm3899            |
| 67815                               | 2529 | 8 | 14.39% | 0.8883<br>35 | 2  | 3.88%  | 0.222<br>333 | Sec14l2           |
| 68194                               | 454  | 8 | 14.54% | 4.9484<br>57 | 19 | 18.28% | 11.76<br>576 | Ndufb4            |
| 111175                              | 1205 | 8 | 32.03% | 1.8643<br>98 | 15 | 41.16% | 3.499<br>664 | Pecr              |
| gi 149264427 ref X<br>M_001472312.1 | 2556 | 8 | 15.34% | 0.8789<br>51 | 6  | 11.42% | 0.659<br>952 | -                 |
| 13813                               | 3731 | 8 | 8.93%  | 0.6021<br>44 | -  | -      | -            | Eomes             |
| 225870                              | 4176 | 8 | 9.39%  | 0.5379<br>79 | 6  | 7.04%  | 0.403<br>936 | Rin1              |

|                              |      |   |        |              |    |        |              |                   |
|------------------------------|------|---|--------|--------------|----|--------|--------------|-------------------|
| 1E+08                        | 1277 | 8 | 26.94% | 1.7592<br>79 | 4  | 15.35% | 0.880<br>625 | Gm1320<br>4       |
| 211535                       | 2453 | 8 | 13.09% | 0.9158<br>58 | -  | -      | -            | Ccdc114           |
| 17207                        | 5269 | 8 | 5.58%  | 0.4263<br>81 | 5  | 4.65%  | 0.266<br>787 | Mcf21             |
| 83961                        | 1952 | 8 | 15.47% | 1.1509<br>22 | 6  | 15.06% | 0.864<br>159 | Nrg4              |
| 77352                        | 2154 | 8 | 16.20% | 1.0429<br>9  | 6  | 10.63% | 0.783<br>119 | Axdnd1            |
| 12035                        | 7868 | 7 | 3.79%  | 0.2498<br>44 | 8  | 4.08%  | 0.285<br>856 | Bcat1             |
| 72091                        | 763  | 7 | 38.79% | 2.5763<br>76 | 5  | 27.65% | 1.842<br>331 | Snhg7             |
| 414068                       | 1661 | 7 | 20.65% | 1.1834<br>89 | 14 | 33.05% | 2.369<br>63  | BC0245<br>82      |
| 66953                        | 2361 | 7 | 11.90% | 0.8326<br>03 | 3  | 6.23%  | 0.357<br>23  | Cdca7             |
| 26462                        | 1922 | 7 | 12.38% | 1.0227<br>76 | 7  | 15.92% | 1.023<br>922 | Txnrd2            |
| 170752                       | 2093 | 7 | 15.15% | 0.9392<br>14 | 14 | 27.52% | 1.880<br>533 | Bco2              |
| 214901                       | 3163 | 7 | 10.84% | 0.6214<br>91 | 5  | 6.23%  | 0.444<br>419 | Chtf18            |
| 78895                        | 2848 | 7 | 8.18%  | 0.6902<br>3  | 3  | 4.49%  | 0.296<br>144 | Pus71             |
| 217310                       | 3237 | 7 | 9.14%  | 0.6072<br>83 | 5  | 7.57%  | 0.434<br>26  | C630004<br>H02Rik |
| gi 158518007 ref NM_007755.4 | 2612 | 7 | 13.13% | 0.7525<br>94 | 4  | 7.50%  | 0.430<br>535 | -                 |
| 16196                        | 2475 | 7 | 11.92% | 0.7942<br>52 | 3  | 5.94%  | 0.340<br>775 | Il7               |
| 664968                       | 1051 | 7 | 32.64% | 1.8703<br>85 | 9  | 29.78% | 2.407<br>476 | Tmem23<br>8       |
| 16977                        | 1470 | 7 | 19.52% | 1.3372<br>62 | -  | -      | -            | Lrrc23            |
| 17025                        | 1392 | 7 | 20.40% | 1.4121<br>94 | 7  | 22.70% | 1.413<br>777 | Alad              |
| 74558                        | 9040 | 7 | 2.19%  | 0.2174<br>53 | 5  | 1.37%  | 0.155<br>498 | Gvin1             |
| 104367                       | 118  | 7 | 88.14% | 16.659<br>11 | 5  | 82.20% | 11.91<br>27  | Snora65           |
| gi 149272093 ref XR_032027.1 | 805  | 7 | 19.88% | 2.4419<br>56 | 2  | 7.20%  | 0.698<br>484 | -                 |

|                                     |       |   |        |              |    |        |              |                   |
|-------------------------------------|-------|---|--------|--------------|----|--------|--------------|-------------------|
| 15484                               | 1874  | 7 | 17.13% | 1.0489<br>73 | 1  | 2.61%  | 0.150<br>021 | Hsd11b2           |
| 21859                               | 4681  | 7 | 7.33%  | 0.4199<br>48 | 10 | 9.08%  | 0.600<br>597 | Timp3             |
| 53883                               | 10543 | 7 | 3.25%  | 0.1864<br>53 | 4  | 1.86%  | 0.106<br>664 | Celsr2            |
| 12169                               | 3005  | 7 | 11.41% | 0.6541<br>68 | 13 | 19.10% | 1.216<br>245 | Bmx               |
| 72415                               | 3609  | 7 | 8.67%  | 0.5446<br>87 | 5  | 6.79%  | 0.389<br>498 | Sgol1             |
| gi 149267956 ref X<br>M_001479870.1 | 576   | 7 | 30.38% | 3.4128<br>03 | 3  | 24.48% | 1.464<br>269 | -                 |
| 20215                               | 1718  | 7 | 19.97% | 1.1442<br>23 | 12 | 28.41% | 1.963<br>723 | Sag               |
| 381126                              | 4783  | 7 | 7.17%  | 0.4109<br>92 | 8  | 7.32%  | 0.470<br>232 | Fam59a            |
| 66556                               | 929   | 7 | 18.84% | 2.1160<br>12 | 3  | 13.67% | 0.907<br>878 | Drap1             |
| 17279                               | 2914  | 7 | 11.77% | 0.6745<br>97 | 8  | 12.59% | 0.771<br>832 | Melk              |
| 16499                               | 2537  | 7 | 10.13% | 0.7748<br>42 | 7  | 13.52% | 0.775<br>711 | Kcnab3            |
| gi 149266571 ref X<br>R_030860.1    | 3575  | 7 | 1.73%  | 0.5498<br>67 | 2  | 1.45%  | 0.157<br>281 | -                 |
| 66475                               | 572   | 7 | 18.18% | 3.4366<br>69 | 6  | 20.28% | 2.949<br>017 | Rps23             |
| 403174                              | 2793  | 7 | 12.28% | 0.7038<br>22 | 11 | 16.54% | 1.107<br>245 | A930005<br>I04Rik |
| 217169                              | 4755  | 7 | 6.77%  | 0.4134<br>12 | 8  | 7.34%  | 0.473        | Tns4              |
| 22035                               | 4944  | 7 | 3.86%  | 0.3976<br>08 | 18 | 5.76%  | 1.023<br>567 | Tnfsf10           |
| 75141                               | 2810  | 7 | 12.21% | 0.6995<br>64 | 4  | 6.98%  | 0.400<br>199 | Rasd2             |
| gi 149269277 ref X<br>M_001476489.1 | 1022  | 7 | 28.77% | 1.9234<br>59 | 3  | 14.38% | 0.825<br>263 | -                 |
| gi 162287253 ref N<br>M_177889.4    | 2093  | 7 | 15.38% | 0.9392<br>14 | 2  | 4.68%  | 0.268<br>648 | -                 |
| 68195                               | 1031  | 7 | 13%    | 1.9066<br>68 | 12 | 22.70% | 3.272<br>237 | Rnaset2b          |
| 207839                              | 5715  | 7 | 5.62%  | 0.3439<br>68 | 1  | 0.86%  | 0.049<br>193 | Galnt6            |
| 404634                              | 1910  | 7 | 13.77% | 1.0292<br>01 | 3  | 6.34%  | 0.441<br>581 | H2afy2            |

|                                  |      |   |        |              |    |        |              |                   |
|----------------------------------|------|---|--------|--------------|----|--------|--------------|-------------------|
| 66995                            | 3327 | 7 | 8.84%  | 0.5908<br>55 | 4  | 5.89%  | 0.338<br>01  | Zcchc18           |
| 14582                            | 1823 | 7 | 16.40% | 1.0783<br>19 | 3  | 8.06%  | 0.462<br>654 | Gfi1b             |
| 11628                            | 2413 | 7 | 14.21% | 0.8146<br>6  | 4  | 8.12%  | 0.466<br>042 | Aicda             |
| 1E+08                            | 963  | 7 | 16.30% | 2.0413<br>03 | 3  | 6.85%  | 0.875<br>824 | Tigit             |
| gi 149274729 ref X<br>M_908118.3 | 1755 | 7 | 7.29%  | 1.1201       | 1  | 2.79%  | 0.160<br>194 | -                 |
| 231863                           | 2831 | 7 | 10.88% | 0.6943<br>75 | 4  | 6.92%  | 0.397<br>23  | Fbxl18            |
| 74445                            | 6479 | 7 | 5.29%  | 0.3034<br>07 | 4  | 3.03%  | 0.173<br>57  | 4933412<br>A08Rik |
| 67866                            | 1169 | 7 | 25.66% | 1.6815<br>87 | 1  | 4.19%  | 0.240<br>496 | Wfdc1             |
| 68226                            | 2551 | 7 | 11.60% | 0.7705<br>9  | 12 | 21.13% | 1.322<br>492 | Efcab2            |
| 12581                            | 1271 | 7 | 15.18% | 1.5466<br>36 | 6  | 15.58% | 1.327<br>174 | Cdkn2d            |
| 80733                            | 1125 | 7 | 23.64% | 1.7473<br>55 | 9  | 29.51% | 2.249<br>117 | Car15             |
| 232785                           | 4415 | 7 | 7.77%  | 0.4452<br>49 | 1  | 1.11%  | 0.063<br>678 | Zfp783            |
| gi 149274389 ref X<br>R_034197.1 | 1473 | 7 | 20.57% | 1.3345<br>38 | 7  | 21.66% | 1.336<br>034 | -                 |
| 20317                            | 1497 | 7 | 22.51% | 1.3131<br>43 | 5  | 10.69% | 0.939<br>01  | Serpinf1          |
| 72026                            | 1520 | 7 | 18.75% | 1.2932<br>73 | 3  | 9.67%  | 0.554<br>881 | Trmu              |
| 17957                            | 3693 | 7 | 9.29%  | 0.5322<br>98 | 3  | 3.93%  | 0.228<br>383 | Napb              |
| 69549                            | 571  | 7 | 29.42% | 3.4426<br>88 | 6  | 29.25% | 2.954<br>182 | 2310009<br>B15Rik |
| gi 149265609 ref X<br>M_993473.2 | 778  | 7 | 7.07%  | 2.5267<br>03 | 22 | 6.94%  | 7.949<br>965 | -                 |
| 244152                           | 2760 | 7 | 12.43% | 0.7122<br>37 | 3  | 5.33%  | 0.305<br>587 | Tsku              |
| 60525                            | 2833 | 7 | 11.54% | 0.6938<br>84 | 12 | 17.51% | 1.190<br>849 | Accs2             |
| 668166                           | 5623 | 7 | 4.48%  | 0.3495<br>95 | 14 | 10.26% | 0.699<br>974 | Zxdb              |
| 385499                           | 600  | 7 | 9.67%  | 3.2762<br>91 | 17 | 10%    | 7.965<br>624 | Gm5401            |

|                              |      |   |        |              |    |        |              |         |
|------------------------------|------|---|--------|--------------|----|--------|--------------|---------|
| 268465                       | 2228 | 7 | 14.86% | 0.8823<br>05 | 3  | 6.60%  | 0.378<br>554 | Eme1    |
| 71564                        | 938  | 7 | 25.80% | 2.0957<br>09 | 5  | 24.31% | 1.498<br>612 | Izumo4  |
| 56448                        | 2788 | 7 | 11.05% | 0.7050<br>84 | 2  | 3.52%  | 0.201<br>678 | Cyp2d22 |
| 207742                       | 4336 | 7 | 7.91%  | 0.4533<br>61 | 4  | 4.52%  | 0.259<br>354 | Rnf43   |
| 74481                        | 1433 | 7 | 20.52% | 1.3717<br>9  | 17 | 45.64% | 3.335<br>223 | Batf2   |
| 232933                       | 2010 | 7 | 14.43% | 0.9779<br>97 | 9  | 16.77% | 1.258<br>834 | Ccdc61  |
| 218121                       | 2881 | 7 | 11.91% | 0.6823<br>24 | 5  | 7.81%  | 0.487<br>92  | Mboat1  |
| gi 149247742 ref XR_033326.1 | 842  | 7 | 24.23% | 2.3346<br>49 | 2  | 11.64% | 0.667<br>79  | -       |
| 13867                        | 4020 | 7 | 8.53%  | 0.4889<br>99 | 2  | 2.44%  | 0.139<br>87  | Erbp3   |
| gi 149260688 ref XR_032300.1 | 1177 | 7 | 10.54% | 1.6701<br>57 | 23 | 13.08% | 5.493<br>808 | -       |
| 108079                       | 8201 | 7 | 4.18%  | 0.2396<br>99 | 2  | 1.19%  | 0.068<br>562 | Prkaa2  |
| 263803                       | 2948 | 7 | 11.64% | 0.6668<br>16 | 9  | 13.36% | 0.858<br>296 | Pkn3    |
| 14697                        | 1799 | 7 | 18.01% | 1.0927<br>04 | 1  | 2.72%  | 0.156<br>276 | Gnb5    |
| gi 219803170 ref NR_026574.1 | 4073 | 7 | 3.24%  | 0.4826<br>36 | 9  | 3.12%  | 0.621<br>227 | -       |
| 320557                       | 4570 | 7 | 7.51%  | 0.4301<br>48 | 6  | 6.15%  | 0.369<br>111 | Fam169a |
| 243864                       | 1120 | 7 | 20%    | 1.7551<br>56 | 5  | 18.12% | 1.255<br>088 | Mill2   |
| 235386                       | 5103 | 7 | 5.57%  | 0.3852<br>19 | 3  | 2.88%  | 0.165<br>279 | Agphd1  |
| 117167                       | 3140 | 7 | 10.92% | 0.6260<br>43 | 7  | 10.54% | 0.626<br>744 | Steap4  |
| 78408                        | 2271 | 7 | 11.54% | 0.8655<br>99 | 10 | 16.60% | 1.237<br>955 | Fam131a |
| 328977                       | 5512 | 7 | 6.22%  | 0.3566<br>35 | 2  | 1.78%  | 0.102<br>01  | Zfp532  |
| 66120                        | 799  | 7 | 31.16% | 2.4602<br>94 | 2  | 12.27% | 0.703<br>729 | Fkbp11  |
| 71228                        | 7878 | 7 | 4.35%  | 0.2495<br>27 | 6  | 3.73%  | 0.214<br>12  | Dlg5    |

|                                 |      |   |        |              |    |        |              |                   |
|---------------------------------|------|---|--------|--------------|----|--------|--------------|-------------------|
| 625018                          | 5369 | 7 | 5.49%  | 0.3661<br>34 | 5  | 4.56%  | 0.261<br>818 | C4a               |
| 13052                           | 5538 | 7 | 4.42%  | 0.3549<br>61 | 7  | 4.42%  | 0.355<br>359 | Cxadr             |
| 72958                           | 3274 | 7 | 8.98%  | 0.6004<br>2  | 4  | 5.99%  | 0.343<br>482 | Zfp493            |
| 235582                          | 4226 | 7 | 7.55%  | 0.4651<br>62 | 5  | 5.80%  | 0.332<br>631 | Glyetk            |
| 237886                          | 3856 | 7 | 7.44%  | 0.5097<br>96 | 9  | 5.32%  | 0.656<br>187 | Slfn9             |
| 12189                           | 6648 | 7 | 5.16%  | 0.2956<br>94 | 13 | 9.16%  | 0.549<br>762 | Brca1             |
| 244144                          | 3982 | 7 | 8.26%  | 0.4936<br>65 | 9  | 9.14%  | 0.635<br>424 | Usp35             |
| 26366                           | 1060 | 7 | 32.26% | 1.8545<br>04 | 1  | 4.62%  | 0.265<br>226 | Ceacam1<br>0      |
| 67849                           | 1906 | 7 | 15.48% | 1.0313<br>61 | 2  | 5.14%  | 0.295<br>005 | Cdca5             |
| 170823                          | 2015 | 7 | 14.64% | 0.9755<br>71 | 9  | 19.40% | 1.255<br>711 | Glmn              |
| 66730                           | 1905 | 7 | 12.07% | 1.0319<br>03 | 5  | 10.81% | 0.737<br>899 | 4921531<br>C22Rik |
| 12874                           | 9152 | 7 | 2.29%  | 0.2147<br>92 | 3  | 1.61%  | 0.092<br>157 | Cpd               |
| 16564                           | 6439 | 7 | 5.28%  | 0.3052<br>92 | 5  | 3.80%  | 0.218<br>31  | Kif21a            |
| 69168                           | 729  | 7 | 29.63% | 2.6965<br>36 | 6  | 37.31% | 2.313<br>907 | Bola1             |
| 14538                           | 4021 | 7 | 7.71%  | 0.4888<br>77 | 1  | 1.22%  | 0.069<br>918 | Gcnt2             |
| 109254                          | 2519 | 7 | 2.62%  | 0.7803<br>79 | 6  | 2.46%  | 0.669<br>646 | 9530008<br>L14Rik |
| 330554                          | 3475 | 7 | 8.95%  | 0.5656<br>91 | 3  | 4.23%  | 0.242<br>71  | Fan1              |
| gi 153792153 ref NM_008415.5    | 3378 | 7 | 8.35%  | 0.5819<br>34 | 4  | 5.80%  | 0.332<br>907 | -                 |
| 329554                          | 1097 | 7 | 25.71% | 1.7919<br>55 | 11 | 36.01% | 2.819<br>085 | Gm826             |
| 89867                           | 4611 | 7 | 7.44%  | 0.4263<br>23 | 5  | 3.25%  | 0.304<br>858 | Sec16b            |
| gi 149262388 ref XM_001472960.1 | 286  | 7 | 37.76% | 6.8733<br>38 | 4  | 35.66% | 3.932<br>023 | -                 |
| 94282                           | 3654 | 7 | 9.39%  | 0.5379<br>79 | 4  | 5.15%  | 0.307<br>761 | Sfxn5             |

|                                  |       |   |        |              |    |        |              |                   |
|----------------------------------|-------|---|--------|--------------|----|--------|--------------|-------------------|
| 66962                            | 1846  | 7 | 14.57% | 1.0648<br>83 | 4  | 10.62% | 0.609<br>187 | 2310047<br>B19Rik |
| 18701                            | 980   | 7 | 27.65% | 2.0058<br>93 | 11 | 39.29% | 3.155<br>649 | Pigf              |
| 15485                            | 1317  | 7 | 25.59% | 1.4926<br>16 | 1  | 3.72%  | 0.213<br>47  | Hsd17b1           |
| 60507                            | 1328  | 7 | 11.52% | 1.4802<br>52 | 7  | 13.33% | 1.481<br>911 | Qtrt1             |
| 74637                            | 2781  | 7 | 12.26% | 0.7068<br>59 | 9  | 13.92% | 0.909<br>837 | Shpk              |
| gi 118130869 ref N<br>M_183288.2 | 1426  | 7 | 24.05% | 1.3785<br>24 | 5  | 15.50% | 0.985<br>763 | -                 |
| 16768                            | 2020  | 7 | 16.49% | 0.9731<br>56 | 2  | 4.85%  | 0.278<br>356 | Lag3              |
| 117606                           | 4428  | 7 | 7.75%  | 0.4439<br>42 | 1  | 1.11%  | 0.063<br>491 | Boc               |
| 13877                            | 812   | 7 | 14.29% | 2.4209<br>05 | 7  | 13.30% | 2.423<br>618 | Erh               |
| 217935                           | 3725  | 7 | 8.56%  | 0.5277<br>25 | 4  | 5.26%  | 0.301<br>895 | Wdr60             |
| 211232                           | 2779  | 7 | 7.77%  | 0.7073<br>68 | 7  | 12.34% | 0.708<br>16  | Cpne9             |
| gi 149275067 ref X<br>R_032055.1 | 1975  | 7 | 10.33% | 0.9953<br>29 | 6  | 7.75%  | 0.854<br>095 | -                 |
| 260305                           | 5047  | 7 | 6.50%  | 0.3894<br>94 | 9  | 7.21%  | 0.501<br>339 | Nphp4             |
| 353346                           | 3433  | 7 | 8.77%  | 0.5726<br>11 | 7  | 8.59%  | 0.573<br>253 | Gpr141            |
| 68144                            | 6021  | 7 | 4.40%  | 0.3264<br>86 | 1  | 0.81%  | 0.046<br>693 | 5031426<br>D15Rik |
| 1E+08                            | 2101  | 7 | 5.47%  | 0.9356<br>38 | 14 | 7.62%  | 1.873<br>372 | Gm3853            |
| 76131                            | 3333  | 7 | 7.47%  | 0.5897<br>91 | 4  | 5.88%  | 0.337<br>401 | Depdc1a           |
| 1E+08                            | 2048  | 7 | 5.81%  | 0.9598<br>51 | 7  | 2.93%  | 0.960<br>927 | Gm4031            |
| 20913                            | 6035  | 7 | 5.35%  | 0.3257<br>29 | 8  | 5.19%  | 0.372<br>679 | Stxbp4            |
| 22137                            | 2904  | 7 | 10.12% | 0.6769<br>2  | 3  | 5.06%  | 0.290<br>434 | Ttk               |
| 12325                            | 3703  | 7 | 5.37%  | 0.5308<br>6  | 3  | 3.97%  | 0.227<br>766 | Camk2g            |
| 20511                            | 11571 | 7 | 2.12%  | 0.1698<br>88 | 8  | 3.07%  | 0.194<br>375 | Slc1a2            |

|                                  |       |   |        |              |    |        |              |                   |
|----------------------------------|-------|---|--------|--------------|----|--------|--------------|-------------------|
| gi 149255004 ref X<br>M_914561.3 | 1500  | 7 | 6.53%  | 1.3105<br>16 | 1  | 3.27%  | 0.187<br>426 | -                 |
| 73689                            | 910   | 7 | 20.99% | 2.1601<br>92 | 5  | 15.60% | 1.544<br>723 | Bloc1s2a          |
| 66425                            | 1575  | 7 | 21.78% | 1.2481<br>11 | 3  | 9.33%  | 0.535<br>504 | Pcp411            |
| 67063                            | 2983  | 7 | 10.76% | 0.6589<br>93 | 12 | 16.73% | 1.130<br>967 | Tmem24<br>6       |
| gi 145386586 ref N<br>M_207624.4 | 4885  | 7 | 6.10%  | 0.4024<br>1  | 4  | 4.01%  | 0.230<br>206 | -                 |
| gi 21314829 ref N<br>M_139292.1  | 2011  | 7 | 17.06% | 0.9775<br>11 | 2  | 4.87%  | 0.279<br>602 | -                 |
| 226352                           | 6510  | 7 | 3.01%  | 0.3019<br>62 | 4  | 3.01%  | 0.172<br>743 | Epb4.115          |
| 13617                            | 3643  | 7 | 9.42%  | 0.5396<br>03 | -  | -      | -            | Ednra             |
| 231668                           | 4054  | 7 | 7.33%  | 0.4848<br>98 | 3  | 3.63%  | 0.208<br>046 | Vsig10            |
| 66456                            | 917   | 7 | 36.53% | 2.1437<br>02 | 2  | 10.69% | 0.613<br>173 | 2810001<br>G20Rik |
| gi 16905074 ref N<br>M_054039.1  | 3739  | 7 | 9.17%  | 0.5257<br>49 | 2  | 2.14%  | 0.150<br>382 | -                 |
| 68982                            | 1883  | 7 | 13.49% | 1.0439<br>59 | 8  | 18.22% | 1.194<br>433 | 1500015<br>A07Rik |
| 14733                            | 3552  | 7 | 9.66%  | 0.5534<br>28 | 2  | 2.76%  | 0.158<br>299 | Gpc1              |
| 20743                            | 8254  | 7 | 3.56%  | 0.2381<br>6  | 7  | 4.16%  | 0.238<br>427 | Spnb3             |
| gi 94410339 ref X<br>M_904758.2  | 441   | 7 | 39.46% | 4.4575<br>39 | 3  | 29.93% | 1.912<br>515 | -                 |
| 317750                           | 1951  | 7 | 16.66% | 1.0075<br>73 | 6  | 13.99% | 0.864<br>602 | Slc24a5           |
| 1E+08                            | 116   | 7 | 89.66% | 16.946<br>33 | 4  | 80.17% | 9.694<br>471 | Snora75           |
| 233651                           | 10651 | 7 | 2.94%  | 0.1845<br>62 | 10 | 4.16%  | 0.263<br>956 | Dchs1             |
| 240667                           | 3923  | 7 | 8.74%  | 0.5010<br>9  | 2  | 2.50%  | 0.143<br>329 | Sec31b            |
| 12349                            | 1807  | 7 | 16.33% | 1.0878<br>66 | 6  | 14.72% | 0.933<br>502 | Car2              |
| 67092                            | 2357  | 7 | 13.41% | 0.8340<br>16 | 4  | 8.32%  | 0.477<br>114 | Gatm              |
| 381524                           | 2123  | 7 | 16.16% | 0.9259<br>42 | -  | -      | -            | AI42780<br>9      |



|                                     |      |   |        |              |    |        |              |                   |
|-------------------------------------|------|---|--------|--------------|----|--------|--------------|-------------------|
| 70348                               | 1828 | 7 | 18.54% | 1.0753<br>69 | -  | -      | -            | Ube2cbp           |
| gi 149266134 ref X<br>M_001479333.1 | 3393 | 7 | 9.61%  | 0.5793<br>62 | 13 | 16.21% | 1.077<br>163 | -                 |
| 1E+08                               | 824  | 7 | 30.22% | 2.3856<br>49 | 6  | 17.84% | 2.047<br>133 | Gm2511            |
| 338350                              | 2375 | 7 | 13.09% | 0.8276<br>95 | 5  | 10.32% | 0.591<br>873 | Acad12            |
| 18782                               | 2264 | 7 | 5.57%  | 0.8682<br>75 | 4  | 3.58%  | 0.496<br>713 | Pla2g2d           |
| 68328                               | 1071 | 7 | 21.10% | 1.8354<br>57 | 5  | 19.98% | 1.312<br>51  | Rab13             |
| 71085                               | 5150 | 7 | 6.47%  | 0.3817<br>04 | 7  | 6.66%  | 0.382<br>132 | Arhgap1<br>9      |
| 56520                               | 863  | 7 | 25.26% | 2.2778<br>39 | 8  | 35.57% | 2.606<br>161 | Nme4              |
| 1E+08                               | 1702 | 7 | 6.23%  | 1.1549<br>79 | 23 | 3.35%  | 3.799<br>185 | Gm3817            |
| 69920                               | 707  | 7 | 26.73% | 2.7804<br>45 | 6  | 15.56% | 2.385<br>909 | Polr2i            |
| gi 142386703 ref N<br>M_020574.4    | 1012 | 7 | 25.89% | 1.9424<br>65 | -  | -      | -            | -                 |
| gi 94371496 ref X<br>M_905410.2     | 715  | 7 | 17.06% | 2.7493<br>35 | 8  | 18.88% | 3.145<br>619 | -                 |
| gi 149274378 ref X<br>R_031186.1    | 665  | 7 | 24.96% | 2.9560<br>52 | 5  | 19.55% | 2.113<br>832 | -                 |
| 407800                              | 3626 | 7 | 7.80%  | 0.5421<br>33 | 3  | 1.57%  | 0.232<br>603 | Ecm2              |
| 29873                               | 3881 | 7 | 7.65%  | 0.5065<br>12 | 2  | 2.53%  | 0.144<br>88  | Cspg5             |
| 18099                               | 4507 | 7 | 6.12%  | 0.4361<br>6  | 3  | 3.26%  | 0.187<br>135 | Nlk               |
| 76261                               | 1870 | 7 | 16.47% | 1.0512<br>16 | 6  | 11.60% | 0.902<br>052 | 0610040<br>J01Rik |
| 13845                               | 4164 | 7 | 5.88%  | 0.4720<br>88 | 5  | 5.88%  | 0.337<br>584 | Ephb3             |
| 1E+08                               | 2186 | 7 | 11.25% | 0.8992<br>57 | 6  | 4.62%  | 0.771<br>655 | Gm3697            |
| 69519                               | 1334 | 7 | 20.69% | 1.4735<br>94 | 5  | 17.62% | 1.053<br>747 | Rwdd2a            |
| 230161                              | 5048 | 7 | 3.21%  | 0.3894<br>17 | 11 | 4.99%  | 0.612<br>626 | Acnat1            |
| 381352                              | 3990 | 7 | 8.60%  | 0.4926<br>75 | 4  | 4.91%  | 0.281<br>844 | Mamdc4            |

|                              |      |   |        |              |    |        |              |                   |
|------------------------------|------|---|--------|--------------|----|--------|--------------|-------------------|
| 68126                        | 1242 | 7 | 27.62% | 1.5827<br>49 | 9  | 31.72% | 2.037<br>244 | Fahd2a            |
| 27375                        | 3037 | 7 | 10.27% | 0.6472<br>75 | 7  | 10.54% | 0.648<br>001 | Tjp3              |
| 432779                       | 2746 | 7 | 7.83%  | 0.7158<br>68 | 4  | 2.62%  | 0.409<br>526 | Lrrc14b           |
| 434246                       | 2472 | 7 | 10.48% | 0.7952<br>16 | 8  | 15.86% | 0.909<br>837 | Trim72            |
| 103841                       | 3189 | 7 | 10.44% | 0.6164<br>24 | 14 | 20.73% | 1.234<br>229 | Cuedc1            |
| 75516                        | 1000 | 7 | 32.20% | 1.9657<br>75 | 6  | 21.70% | 1.686<br>838 | Ttc32             |
| 64435                        | 1911 | 7 | 10.15% | 1.0286<br>63 | -  | -      | -            | Fcamr             |
| gi 121674802 ref NM_172732.2 | 1156 | 7 | 26.04% | 1.7004<br>97 | 4  | 14.79% | 0.972<br>802 | -                 |
| 229521                       | 4585 | 7 | 2.33%  | 0.4287<br>4  | 6  | 1.55%  | 0.367<br>904 | Syt11             |
| 14048                        | 4354 | 7 | 7.35%  | 0.4514<br>87 | 2  | 2.25%  | 0.129<br>141 | Eya1              |
| 74559                        | 5453 | 7 | 6.29%  | 0.3604<br>94 | 3  | 2.70%  | 0.154<br>671 | Elovl7            |
| 73919                        | 1276 | 7 | 23.04% | 1.5405<br>76 | 2  | 7.68%  | 0.440<br>658 | Lyrml             |
| 230767                       | 2213 | 7 | 9.31%  | 0.8882<br>85 | 3  | 4.79%  | 0.381<br>12  | Iqcc              |
| 11932                        | 2959 | 7 | 10.44% | 0.6643<br>38 | 2  | 3.31%  | 0.190<br>023 | Atp1b2            |
| 18082                        | 1874 | 7 | 12.86% | 1.0489<br>73 | 3  | 7.84%  | 0.450<br>063 | Nipsnap<br>1      |
| 14254                        | 6280 | 7 | 5.46%  | 0.3130<br>21 | 4  | 3.12%  | 0.179<br>07  | Flt1              |
| 76645                        | 7386 | 7 | 4.64%  | 0.2661<br>49 | 2  | 1.33%  | 0.076<br>128 | Pkd112            |
| 171285                       | 2725 | 7 | 10.83% | 0.7213<br>85 | 3  | 5.39%  | 0.309<br>512 | Havcr2            |
| gi 256355199 ref NR_015537.1 | 2120 | 7 | 13.07% | 0.9272<br>52 | 6  | 11.56% | 0.795<br>678 | -                 |
| 69478                        | 612  | 7 | 42.48% | 3.2120<br>5  | 10 | 49.02% | 4.593<br>785 | 2300009<br>A05Rik |
| 12448                        | 3023 | 7 | 8.47%  | 0.6502<br>73 | 6  | 7.77%  | 0.558<br>001 | Ccne2             |
| 78934                        | 2402 | 7 | 10.70% | 0.8183<br>91 | 4  | 8.16%  | 0.468<br>176 | 4930581<br>F22Rik |

|                                 |      |   |        |              |    |        |              |                   |
|---------------------------------|------|---|--------|--------------|----|--------|--------------|-------------------|
| 11858                           | 684  | 7 | 43.71% | 2.8739<br>4  | 14 | 50.44% | 5.754<br>321 | Rnd2              |
| 22414                           | 3573 | 7 | 9.60%  | 0.5501<br>75 | 2  | 1.65%  | 0.157<br>369 | Wnt2b             |
| gi 142348084 ref NM_177386.4    | 7594 | 7 | 4.41%  | 0.2588<br>59 | 3  | 1.94%  | 0.111<br>064 | -                 |
| 53620                           | 1648 | 7 | 18.99% | 1.1928<br>24 | 3  | 5.95%  | 0.511<br>783 | Vamp5             |
| 23890                           | 1898 | 7 | 18.07% | 1.0357<br>09 | 4  | 10.33% | 0.592<br>497 | Gpr34             |
| 12642                           | 1365 | 7 | 23.66% | 1.4401<br>28 | 35 | 75.24% | 7.208<br>709 | Ch25h             |
| 68157                           | 1439 | 7 | 16.33% | 1.3660<br>7  | 3  | 4.38%  | 0.586<br>115 | 6720475<br>J19Rik |
| 26879                           | 1901 | 7 | 17.89% | 1.0340<br>74 | 7  | 17.57% | 1.035<br>233 | B3galnt1          |
| gi 291045295 ref NM_001173459.1 | 1232 | 7 | 22.40% | 1.5955<br>96 | 2  | 4.63%  | 0.456<br>396 | -                 |
| 27425                           | 529  | 7 | 10.78% | 3.7160<br>2  | 6  | 10.78% | 3.188<br>73  | Atp51             |
| gi 149251810 ref XM_001478242.1 | 4925 | 7 | 4.51%  | 0.3991<br>42 | 4  | 3.11%  | 0.228<br>337 | -                 |
| 13804                           | 1032 | 7 | 28.88% | 1.9048<br>2  | 6  | 12.50% | 1.634<br>533 | Endog             |
| 18126                           | 3990 | 7 | 8.60%  | 0.4926<br>75 | 5  | 5.64%  | 0.352<br>305 | Nos2              |
| 14939                           | 1418 | 7 | 19.96% | 1.3863<br>01 | 2  | 6.91%  | 0.396<br>53  | Gzmb              |
| gi 149263779 ref XM_903418.2    | 474  | 7 | 33.97% | 4.1472<br>04 | 4  | 19.20% | 2.372<br>487 | -                 |
| 319930                          | 3361 | 7 | 1.96%  | 0.5848<br>78 | 8  | 3.57%  | 0.669<br>181 | Ceacam1<br>9      |
| 1E+08                           | 2492 | 7 | 9.03%  | 0.7888<br>34 | 4  | 7.87%  | 0.451<br>268 | Gm4434            |
| 109676                          | 5790 | 6 | 3.61%  | 0.2910<br>1  | 8  | 4.27%  | 0.388<br>449 | Ank2              |
| 11504                           | 4904 | 6 | 6%     | 0.3435<br>87 | 7  | 5.59%  | 0.401<br>3   | Adams1            |
| 54215                           | 2590 | 6 | 11.35% | 0.6505<br>6  | 6  | 10.35% | 0.651<br>289 | Cd160             |
| 109050                          | 4701 | 6 | 6.25%  | 0.3584<br>24 | 1  | 1.04%  | 0.059<br>804 | 6530418<br>L21Rik |
| 73390                           | 2140 | 6 | 11.64% | 0.7873<br>6  | 6  | 13.74% | 0.788<br>242 | Msl312            |

|                                     |      |   |        |              |    |        |              |                   |
|-------------------------------------|------|---|--------|--------------|----|--------|--------------|-------------------|
| 19339                               | 1490 | 6 | 14.56% | 1.1308<br>39 | 2  | 6.58%  | 0.377<br>369 | Rab3a             |
| 1E+08                               | 3300 | 6 | 5.09%  | 0.5105<br>91 | 4  | 5.15%  | 0.340<br>775 | 1110002<br>L01Rik |
| 20300                               | 1098 | 6 | 18.67% | 1.5345<br>63 | 6  | 19.03% | 1.536<br>282 | Ccl25             |
| 12374                               | 4549 | 6 | 6.46%  | 0.3704       | 2  | 2.13%  | 0.123<br>605 | Casr              |
| gi 118130144 ref N<br>M_010789.2    | 3057 | 6 | 9.62%  | 0.5511<br>78 | 6  | 8.08%  | 0.551<br>795 | -                 |
| 67121                               | 4652 | 6 | 4.75%  | 0.3621<br>99 | 4  | 4.21%  | 0.241<br>737 | Mastl             |
| 14841                               | 2818 | 6 | 9.79%  | 0.5979<br>24 | 6  | 7.45%  | 0.598<br>594 | Gsg2              |
| 109346                              | 1786 | 6 | 12.77% | 0.9434<br>21 | 6  | 15.96% | 0.944<br>478 | Ankrd39           |
| 110332                              | 2476 | 6 | 7.15%  | 0.6805<br>13 | 6  | 11.87% | 0.681<br>275 | Pp2d1             |
| 381113                              | 2931 | 6 | 8.19%  | 0.5748<br>72 | 2  | 3.34%  | 0.191<br>839 | Cdkl4             |
| 224598                              | 2988 | 6 | 4.69%  | 0.5639<br>06 | 6  | 8.94%  | 0.564<br>537 | Zfp758            |
| 330695                              | 1242 | 6 | 18.60% | 1.3566<br>42 | 3  | 11.84% | 0.679<br>081 | Ctxn1             |
| 213389                              | 3460 | 6 | 5.61%  | 0.4869<br>8  | 4  | 5.66%  | 0.325<br>017 | Prdm9             |
| 16785                               | 1861 | 6 | 8.22%  | 0.9054       | 8  | 10.80% | 1.208<br>553 | Rpsa              |
| 67629                               | 1349 | 6 | 21.79% | 1.2490<br>36 | 9  | 29.65% | 1.875<br>654 | Sp24              |
| gi 149247788 ref X<br>M_001477670.1 | 1058 | 6 | 13.89% | 1.5925<br>8  | 3  | 11.25% | 0.797<br>182 | -                 |
| 66768                               | 1464 | 6 | 20.01% | 1.1509<br>22 | 6  | 17.35% | 1.152<br>212 | Pacrgl            |
| 53600                               | 1162 | 6 | 9.64%  | 1.4500<br>43 | 8  | 9.98%  | 1.935<br>557 | Timm23            |
| gi 149250517 ref X<br>M_001480261.1 | 1913 | 6 | 8.94%  | 0.8807<br>89 | 4  | 8.63%  | 0.587<br>851 | -                 |
| 74251                               | 2558 | 6 | 10.20% | 0.6586<br>98 | 16 | 19.04% | 1.758<br>497 | Ankrd9            |
| 66468                               | 2669 | 6 | 9.10%  | 0.6313<br>04 | 4  | 7.34%  | 0.421<br>341 | Ska1              |
| 71151                               | 3569 | 6 | 8.01%  | 0.4721<br>07 | 6  | 8.24%  | 0.472<br>636 | Eri2              |

|                                     |      |   |        |              |    |        |              |                   |
|-------------------------------------|------|---|--------|--------------|----|--------|--------------|-------------------|
| 16351                               | 2118 | 6 | 12.98% | 0.7955<br>38 | 8  | 18.08% | 1.061<br>906 | Ipp               |
| 225192                              | 1537 | 6 | 16.01% | 1.0962<br>59 | -  | -      | -            | Hrh4              |
| 329659                              | 1541 | 6 | 19.08% | 1.0934<br>13 | 9  | 21.80% | 1.641<br>958 | E130311<br>K13Rik |
| 52665                               | 3048 | 6 | 5.64%  | 0.5528<br>05 | 9  | 8.79%  | 0.830<br>137 | Echdc1            |
| 1E+08                               | 2816 | 6 | 7.07%  | 0.5983<br>49 | 3  | 5.22%  | 0.299<br>51  | Tgtp2             |
| 16599                               | 2314 | 6 | 8.04%  | 0.7281<br>55 | 6  | 7.43%  | 0.728<br>971 | Klf3              |
| 56030                               | 6563 | 6 | 3.61%  | 0.2567<br>35 | 2  | 1.49%  | 0.085<br>674 | Tmem13<br>1       |
| gi 149274721 ref X<br>M_001481209.1 | 396  | 6 | 31.57% | 4.2549<br>24 | 8  | 54.04% | 5.679<br>589 | -                 |
| gi 295789086 ref N<br>M_001177964.1 | 1434 | 6 | 11.51% | 1.175        | 2  | 6%     | 0.392<br>106 | -                 |
| 668173                              | 1647 | 6 | 17.30% | 1.0230<br>42 | 3  | 8.93%  | 0.512<br>094 | Pex10             |
| 215707                              | 2256 | 6 | 11.13% | 0.7468<br>75 | 2  | 4.34%  | 0.249<br>237 | Ccdc92            |
| gi 142387311 ref N<br>M_025565.2    | 1161 | 6 | 25.32% | 1.4512<br>92 | 10 | 31.87% | 2.421<br>53  | -                 |
| 13983                               | 3362 | 6 | 2.08%  | 0.5011<br>75 | 4  | 1.52%  | 0.334<br>491 | Esr2              |
| gi 149251836 ref X<br>M_001478884.1 | 3562 | 6 | 2.33%  | 0.4730<br>35 | 11 | 2.02%  | 0.868<br>202 | -                 |
| 1E+08                               | 2180 | 6 | 6.74%  | 0.7729<br>13 | 3  | 4.54%  | 0.386<br>889 | Gm4072            |
| 229665                              | 2342 | 6 | 12.55% | 0.7194<br>49 | 6  | 12.55% | 0.720<br>255 | Ampd1             |
| gi 149268467 ref X<br>M_001471837.1 | 1382 | 6 | 21.27% | 1.2192<br>11 | 1  | 3.55%  | 0.203<br>43  | -                 |
| 68481                               | 2356 | 6 | 11.76% | 0.7151<br>74 | 3  | 6.24%  | 0.357<br>988 | Mpz11             |
| 19347                               | 4972 | 6 | 1.87%  | 0.3388<br>88 | 1  | 0.99%  | 0.056<br>545 | Dennd5a           |
| 13388                               | 3444 | 6 | 8.54%  | 0.4892<br>42 | 12 | 14.23% | 0.979<br>581 | Dl11              |
| gi 118130998 ref N<br>M_008080.4    | 2395 | 6 | 6.85%  | 0.7035<br>28 | 2  | 3.30%  | 0.234<br>772 | -                 |
| 14051                               | 4099 | 6 | 7.17%  | 0.4110<br>64 | 1  | 1.20%  | 0.068<br>587 | Eya4              |

|                                     |       |   |        |              |    |        |              |                   |
|-------------------------------------|-------|---|--------|--------------|----|--------|--------------|-------------------|
| 54369                               | 1025  | 6 | 24.10% | 1.6438<br>53 | 6  | 20.29% | 1.645<br>696 | Nme6              |
| gi 94377518 ref X<br>M_994639.1     | 2568  | 6 | 9.07%  | 0.6561<br>33 | 2  | 3.82%  | 0.218<br>956 | -                 |
| 16160                               | 1951  | 6 | 14.25% | 0.8636<br>34 | 3  | 7.53%  | 0.432<br>301 | Il12b             |
| 436022                              | 2189  | 6 | 11.47% | 0.7697<br>35 | 8  | 14.48% | 1.027<br>463 | Dnaaf3            |
| gi 141803204 ref N<br>M_025935.2    | 1097  | 6 | 25.34% | 1.5359<br>62 | 6  | 20.69% | 1.537<br>683 | -                 |
| 60425                               | 1481  | 6 | 19.85% | 1.1377<br>11 | 3  | 9.93%  | 0.569<br>493 | Doc2g             |
| gi 237681132 ref N<br>M_001160239.1 | 570   | 6 | 13.33% | 2.9560<br>52 | 9  | 13.86% | 4.439<br>047 | -                 |
| 53376                               | 3882  | 6 | 7.57%  | 0.4340<br>42 | 11 | 12.11% | 0.796<br>635 | Usp2              |
| 208366                              | 2736  | 6 | 10.20% | 0.6158<br>44 | 13 | 16.89% | 1.335<br>824 | Rpp40             |
| 19341                               | 1427  | 6 | 17.17% | 1.1807<br>64 | 2  | 4.77%  | 0.394<br>029 | Rab4a             |
| 192190                              | 12750 | 6 | 2.31%  | 0.1321<br>53 | 1  | 0.38%  | 0.022<br>05  | Pkhd111           |
| 14865                               | 1684  | 6 | 17.46% | 1.0005<br>64 | 17 | 33.14% | 2.838<br>108 | Gstm4             |
| 1E+08                               | 3419  | 6 | 1.90%  | 0.4928<br>19 | 5  | 2.87%  | 0.411<br>143 | Gm1971            |
| 12224                               | 1728  | 6 | 13.95% | 0.9750<br>87 | 9  | 19.85% | 1.464<br>269 | Klf5              |
| 68431                               | 1365  | 6 | 19.05% | 1.2343<br>95 | 5  | 17.95% | 1.029<br>816 | Fbx115            |
| 68794                               | 9166  | 6 | 2.85%  | 0.1838<br>26 | 5  | 2.17%  | 0.153<br>36  | Flnc              |
| 66046                               | 999   | 6 | 12.71% | 1.6866<br>36 | 3  | 14.01% | 0.844<br>263 | Ndufb5            |
| 77318                               | 2887  | 6 | 8.49%  | 0.5836<br>33 | 2  | 3.39%  | 0.194<br>762 | Ankrd55           |
| 20493                               | 1674  | 6 | 6.81%  | 1.0065<br>41 | 3  | 2.93%  | 0.503<br>835 | Slc10a1           |
| 211135                              | 2002  | 6 | 14.69% | 0.8416<br>33 | 4  | 9.79%  | 0.561<br>718 | D130040<br>H23Rik |
| 69387                               | 1172  | 6 | 21.76% | 1.4376<br>7  | 6  | 19.03% | 1.439<br>282 | Dnajb13           |
| 22646                               | 2004  | 6 | 13.32% | 0.8407<br>93 | 6  | 11.18% | 0.841<br>736 | Zfp105            |

|                                     |      |   |        |              |    |        |              |                   |
|-------------------------------------|------|---|--------|--------------|----|--------|--------------|-------------------|
| 67795                               | 1632 | 6 | 15.13% | 1.0324<br>45 | 8  | 18.01% | 1.378<br>136 | Rnls              |
| 74347                               | 2574 | 6 | 9.95%  | 0.6546<br>04 | 5  | 7.77%  | 0.546<br>114 | 4632415<br>K11Rik |
| 234683                              | 3060 | 6 | 8.01%  | 0.5506<br>37 | 6  | 9.61%  | 0.551<br>254 | Elmo3             |
| 217140                              | 1534 | 6 | 16.95% | 1.0984<br>03 | 4  | 8.02%  | 0.733<br>089 | Scrn2             |
| gi 149256691 ref X<br>M_001481105.1 | 1063 | 6 | 17.69% | 1.5850<br>89 | 6  | 13.73% | 1.586<br>865 | -                 |
| 231946                              | 2096 | 6 | 10.69% | 0.8038<br>88 | 1  | 2.34%  | 0.134<br>132 | D330028<br>D13Rik |
| gi 149266718 ref X<br>M_001477906.1 | 1067 | 6 | 21.56% | 1.5791<br>47 | 7  | 20.24% | 1.844<br>403 | -                 |
| 13587                               | 716  | 6 | 29.61% | 2.3532<br>82 | 3  | 20.53% | 1.177<br>959 | Ear2              |
| gi 149274700 ref X<br>R_033777.1    | 1010 | 6 | 5.74%  | 1.6682<br>67 | 4  | 6.14%  | 1.113<br>424 | -                 |
| gi 94410060 ref X<br>M_912564.2     | 375  | 6 | 61.87% | 4.4931<br>99 | -  | -      | -            | -                 |
| gi 149270659 ref X<br>M_001478369.1 | 3074 | 6 | 7.12%  | 0.5481<br>29 | 5  | 7.97%  | 0.457<br>286 | -                 |
| 80986                               | 2601 | 6 | 11.30% | 0.6478<br>08 | 13 | 18.30% | 1.405<br>158 | Ckap2             |
| gi 94374698 ref X<br>M_897537.2     | 2882 | 6 | 10.20% | 0.5846<br>46 | 2  | 3.40%  | 0.195<br>1   | -                 |
| 237221                              | 1836 | 6 | 11.49% | 0.9177<br>29 | 4  | 8.61%  | 0.612<br>505 | Gemin8            |
| 56720                               | 1646 | 6 | 15.37% | 1.0236<br>63 | 2  | 5.95%  | 0.341<br>603 | Tdo2              |
| 14840                               | 1448 | 6 | 16.23% | 1.1636<br>39 | 2  | 6.77%  | 0.388<br>314 | Gsg1              |
| gi 149268968 ref X<br>M_001477549.1 | 1020 | 6 | 24.22% | 1.6519<br>12 | 5  | 21.86% | 1.378<br>136 | -                 |
| 14221                               | 2446 | 6 | 10.83% | 0.6888<br>59 | 9  | 15.41% | 1.034<br>447 | Fjx1              |
| 15898                               | 2982 | 6 | 9.76%  | 0.5650<br>4  | 1  | 1.64%  | 0.094<br>279 | Icam5             |
| 1E+08                               | 2057 | 6 | 8.65%  | 0.8191<br>3  | 3  | 5.35%  | 0.410<br>024 | Gm1652<br>9       |
| 71078                               | 2362 | 6 | 7.37%  | 0.7133<br>57 | 14 | 27.01% | 1.666<br>365 | Adam30            |
| 67008                               | 3436 | 6 | 8.32%  | 0.4903<br>81 | 4  | 5.70%  | 0.327<br>287 | 1600012<br>F09Rik |

|                                     |      |   |        |              |    |        |              |                   |
|-------------------------------------|------|---|--------|--------------|----|--------|--------------|-------------------|
| 16524                               | 3270 | 6 | 8.99%  | 0.5152<br>75 | 5  | 7.49%  | 0.429<br>877 | Kcnj9             |
| 234542                              | 1923 | 6 | 15.29% | 0.8762<br>09 | 2  | 5.10%  | 0.292<br>397 | Rtbdn             |
| 24050                               | 4731 | 6 | 5.14%  | 0.3561<br>51 | 1  | 1.04%  | 0.059<br>425 | 3-Sep             |
| 626280                              | 3924 | 6 | 6.52%  | 0.4293<br>96 | 2  | 2.50%  | 0.143<br>292 | Gm6661            |
| 14114                               | 3359 | 6 | 8.75%  | 0.5016<br>22 | 1  | 1.46%  | 0.083<br>697 | Fbln1             |
| 69852                               | 4101 | 6 | 7.17%  | 0.4108<br>63 | 5  | 4.95%  | 0.342<br>77  | Tcf23             |
| 50911                               | 1622 | 6 | 13.81% | 1.0388<br>1  | 4  | 10.54% | 0.693<br>316 | Exosc9            |
| 22625                               | 3936 | 6 | 6.33%  | 0.4280<br>87 | -  | -      | -            | Ysk4              |
| 99982                               | 3030 | 6 | 9.60%  | 0.5560<br>89 | 11 | 10.59% | 1.020<br>639 | Kdm1a             |
| 224022                              | 3231 | 6 | 9.10%  | 0.5214<br>95 | 5  | 7.58%  | 0.435<br>066 | Slc7a4            |
| 243897                              | 2653 | 6 | 11.08% | 0.6351<br>11 | 4  | 7.39%  | 0.423<br>882 | Ggn               |
| 57275                               | 668  | 6 | 39.67% | 2.5223<br>8  | 3  | 22.01% | 1.262<br>603 | Lenep             |
| 66176                               | 1130 | 6 | 18.85% | 1.4911<br>06 | 6  | 17.79% | 1.492<br>777 | Nat9              |
| 13835                               | 3273 | 6 | 8.98%  | 0.5148<br>03 | 5  | 6.14%  | 0.429<br>483 | Epha1             |
| 69944                               | 4966 | 6 | 5.92%  | 0.3392<br>97 | 8  | 7.89%  | 0.452<br>903 | 2810021<br>J22Rik |
| gi 149262026 ref X<br>M_001473861.1 | 2024 | 6 | 6.23%  | 0.8324<br>85 | 1  | 2.42%  | 0.138<br>903 | -                 |
| 83922                               | 3393 | 6 | 7.90%  | 0.4965<br>96 | 8  | 9.99%  | 0.662<br>87  | Tsga14            |
| 19376                               | 1721 | 6 | 14.88% | 0.9790<br>53 | 11 | 26.44% | 1.796<br>941 | Rab34             |
| 245631                              | 4600 | 6 | 5.39%  | 0.3662<br>93 | 9  | 8.57%  | 0.550<br>056 | Mum111            |
| 668839                              | 2748 | 6 | 7.24%  | 0.6131<br>55 | 3  | 5.35%  | 0.306<br>921 | Gm9393            |
| gi 149270902 ref X<br>R_031489.1    | 3186 | 6 | 3.39%  | 0.5288<br>61 | 6  | 5.18%  | 0.529<br>453 | -                 |
| 69017                               | 2510 | 6 | 11.71% | 0.6712<br>95 | 2  | 3.90%  | 0.224<br>016 | Prrt2             |



|                                     |       |   |        |              |    |        |              |                   |
|-------------------------------------|-------|---|--------|--------------|----|--------|--------------|-------------------|
| 71988                               | 2899  | 6 | 10.14% | 0.5812<br>18 | 10 | 16.28% | 0.969<br>782 | Esco2             |
| 74032                               | 2835  | 6 | 10.37% | 0.5943<br>39 | 4  | 5.43%  | 0.396<br>67  | Sdr42e1           |
| gi 149258764 ref X<br>M_001478061.1 | 3012  | 6 | 9.43%  | 0.5594<br>12 | 10 | 16.27% | 0.933<br>399 | -                 |
| 268697                              | 2316  | 6 | 11.44% | 0.7275<br>26 | 7  | 10.58% | 0.849<br>731 | Ccnb1             |
| 18197                               | 2243  | 6 | 9.76%  | 0.7512<br>04 | -  | -      | -            | Nsg2              |
| 16012                               | 1305  | 6 | 20.31% | 1.2911<br>49 | 1  | 3.75%  | 0.215<br>433 | Igfbp6            |
| 640020                              | 3694  | 6 | 7.96%  | 0.4561<br>32 | 1  | 1.33%  | 0.076<br>107 | Muc3b             |
| 72000                               | 2047  | 6 | 13.68% | 0.8231<br>31 | -  | -      | -            | 1600016<br>N20Rik |
| 56643                               | 3123  | 6 | 2.18%  | 0.5395<br>29 | 2  | 2.37%  | 0.180<br>045 | Slc15a1           |
| 102124                              | 1307  | 6 | 18.36% | 1.2891<br>74 | 7  | 18.36% | 1.505<br>721 | E130303<br>B06Rik |
| 338369                              | 1147  | 6 | 13.34% | 1.4690<br>06 | 5  | 18.05% | 1.225<br>543 | Tmem22<br>0       |
| 245522                              | 2168  | 6 | 12.41% | 0.7771<br>91 | 2  | 4.52%  | 0.259<br>354 | Zc4h2             |
| 50873                               | 3202  | 6 | 7.87%  | 0.5262<br>18 | 5  | 7.65%  | 0.439<br>006 | Park2             |
| 230863                              | 3158  | 6 | 8.30%  | 0.5335<br>5  | 11 | 13.17% | 0.979<br>271 | Sh2d5             |
| 68550                               | 1302  | 6 | 19.59% | 1.2941<br>24 | 3  | 11.29% | 0.647<br>787 | 1110002<br>N22Rik |
| 114714                              | 2954  | 6 | 8.90%  | 0.5703<br>96 | 16 | 21.73% | 1.522<br>761 | Rad51c            |
| 19116                               | 10328 | 6 | 2.85%  | 0.1631<br>44 | 3  | 1.14%  | 0.081<br>663 | Prlr              |
| 329436                              | 1780  | 6 | 13.37% | 0.9466<br>01 | 2  | 2.81%  | 0.315<br>887 | Gm1446<br>1       |
| 66757                               | 1453  | 6 | 18.03% | 1.1596<br>35 | 2  | 6.74%  | 0.386<br>978 | Adat2             |
| 14164                               | 3909  | 6 | 6.45%  | 0.4310<br>44 | 6  | 4.68%  | 0.431<br>527 | Fgf1              |
| 68708                               | 1650  | 6 | 17.45% | 1.0211<br>82 | 7  | 15.82% | 1.192<br>714 | Rabl2             |
| 53892                               | 2911  | 6 | 5.50%  | 0.5788<br>22 | 11 | 8.04%  | 1.062<br>362 | Ppm1d             |

|                                     |       |   |        |              |    |        |              |                   |
|-------------------------------------|-------|---|--------|--------------|----|--------|--------------|-------------------|
| 243963                              | 3805  | 6 | 7.10%  | 0.4428<br>25 | 2  | 2.58%  | 0.147<br>774 | Zfp473            |
| 22036                               | 2697  | 6 | 10.57% | 0.6247<br>5  | 1  | 1.82%  | 0.104<br>242 | Traip             |
| 11475                               | 1780  | 6 | 11.12% | 0.9466<br>01 | 8  | 21.18% | 1.263<br>549 | Acta2             |
| 226791                              | 1577  | 6 | 18.33% | 1.0684<br>53 | 7  | 16.11% | 1.247<br>925 | Lyplal1           |
| 16597                               | 5742  | 6 | 5.12%  | 0.2934<br>43 | 3  | 2.56%  | 0.146<br>886 | Klf12             |
| 214531                              | 3245  | 6 | 7.67%  | 0.5192<br>45 | 2  | 1.66%  | 0.173<br>276 | Tmprss1<br>3      |
| 320720                              | 2877  | 6 | 7.09%  | 0.5856<br>62 | 5  | 7.89%  | 0.488<br>599 | Fastkd1           |
| gi 31652265 ref N<br>M_145540.2     | 4452  | 6 | 1.91%  | 0.3784<br>7  | 4  | 2.29%  | 0.252<br>596 | -                 |
| 210573                              | 4853  | 6 | 6.06%  | 0.3471<br>98 | 3  | 2.37%  | 0.173<br>793 | Tmem15<br>1b      |
| 70823                               | 3924  | 6 | 6.24%  | 0.4293<br>96 | 2  | 1.27%  | 0.143<br>292 | Hmgxb4            |
| 93737                               | 3143  | 6 | 9.35%  | 0.5360<br>96 | 5  | 7.80%  | 0.447<br>247 | Pard6g            |
| 66204                               | 677   | 6 | 38.26% | 2.4888<br>48 | 12 | 44.76% | 4.983<br>273 | Acyp1             |
| gi 149274768 ref X<br>M_001478915.1 | 444   | 6 | 40.77% | 3.7949<br>32 | 2  | 17.57% | 1.266<br>395 | -                 |
| 11871                               | 864   | 6 | 30.21% | 1.9501<br>73 | 7  | 29.98% | 2.277<br>752 | Art2a-ps          |
| 18166                               | 3007  | 6 | 2.43%  | 0.5603<br>42 | 7  | 4.02%  | 0.654<br>465 | Npy1r             |
| 75729                               | 5187  | 6 | 4.55%  | 0.3248<br>41 | 7  | 3.08%  | 0.379<br>406 | 4933432<br>B09Rik |
| 73261                               | 1099  | 6 | 21.20% | 1.5331<br>66 | 2  | 8.92%  | 0.511<br>628 | 1700037<br>C18Rik |
| 19366                               | 3093  | 6 | 8.73%  | 0.5447<br>62 | 6  | 8.92%  | 0.545<br>373 | Rad54l            |
| 1E+08                               | 2088  | 6 | 5.56%  | 0.8069<br>68 | 3  | 4.98%  | 0.403<br>936 | Gm3714            |
| 22153                               | 2246  | 6 | 13.09% | 0.7502       | 3  | 6.54%  | 0.375<br>52  | Tubb4a            |
| gi 149258109 ref X<br>R_034424.1    | 11526 | 6 | 1.05%  | 0.1461<br>87 | 4  | 1%     | 0.097<br>567 | -                 |
| 271305                              | 3755  | 6 | 7.72%  | 0.4487<br>22 | -  | -      | -            | Phf21b            |

|                                     |      |   |        |              |    |        |              |                   |
|-------------------------------------|------|---|--------|--------------|----|--------|--------------|-------------------|
| 20977                               | 2482 | 6 | 9.71%  | 0.6788<br>68 | 10 | 17.73% | 1.132<br>714 | Syp               |
| 109222                              | 1411 | 6 | 19.56% | 1.1941<br>53 | -  | -      | -            | Rarres1           |
| gi 149261816 ref X<br>M_904084.3    | 3454 | 6 | 4.92%  | 0.4878<br>26 | 3  | 2.84%  | 0.244<br>186 | -                 |
| 69142                               | 1109 | 6 | 19.39% | 1.5193<br>42 | 8  | 22.99% | 2.028<br>059 | Cd209f            |
| gi 149247727 ref X<br>M_001475560.1 | 1137 | 6 | 12.05% | 1.4819<br>26 | 5  | 16.89% | 1.236<br>322 | -                 |
| 1E+08                               | 122  | 6 | 68.85% | 13.811<br>06 | 5  | 80.33% | 11.52<br>212 | Snora28           |
| 231296                              | 3116 | 6 | 9.44%  | 0.5407<br>41 | 2  | 3.15%  | 0.180<br>449 | Lrrc66            |
| gi 149275113 ref X<br>R_033469.1    | 1773 | 6 | 9.31%  | 0.9503<br>38 | 2  | 3.67%  | 0.317<br>134 | -                 |
| 18526                               | 8263 | 6 | 2.37%  | 0.2039<br>15 | 7  | 3.56%  | 0.238<br>167 | Pcdh10            |
| 69066                               | 1100 | 6 | 18.91% | 1.5317<br>73 | 1  | 4.45%  | 0.255<br>582 | 1810010<br>H24Rik |
| 104027                              | 5012 | 6 | 5.61%  | 0.3361<br>83 | 1  | 0.98%  | 0.056<br>093 | Synpo             |
| 432628                              | 3125 | 6 | 9.41%  | 0.5391<br>84 | 6  | 6.34%  | 0.539<br>788 | Mfsd2b            |
| 93701                               | 4480 | 6 | 5.47%  | 0.3761<br>05 | 1  | 1.09%  | 0.062<br>754 | Pcdhgb4           |
| 329514                              | 1396 | 6 | 18.70% | 1.2069<br>84 | 8  | 24.71% | 1.611<br>116 | Gm1404<br>7       |
| 66599                               | 1098 | 6 | 22.68% | 1.5345<br>63 | 18 | 65.48% | 4.608<br>847 | Rdm1              |
| 11596                               | 1399 | 6 | 21.02% | 1.2043<br>96 | 3  | 10.51% | 0.602<br>873 | Ager              |
| 378460                              | 2290 | 6 | 12.84% | 0.7357<br>86 | 7  | 10.31% | 0.859<br>379 | Pram1             |
| 56012                               | 906  | 6 | 31.90% | 1.8597<br>68 | 8  | 37.31% | 2.482<br>469 | Pgam2             |
| 57875                               | 1916 | 6 | 13.31% | 0.8794<br>1  | 5  | 10.91% | 0.733<br>663 | Angptl4           |
| 217125                              | 3334 | 6 | 8.82%  | 0.5053<br>84 | 1  | 1.47%  | 0.084<br>325 | Samd14            |
| 68173                               | 1777 | 6 | 13.79% | 0.9481<br>99 | 3  | 8.27%  | 0.474<br>631 | Ppifos            |
| 194126                              | 2812 | 6 | 9.74%  | 0.5992       | 2  | 3.49%  | 0.199<br>957 | Mtmr11            |

|                                     |      |   |        |              |    |        |              |                   |
|-------------------------------------|------|---|--------|--------------|----|--------|--------------|-------------------|
| gi 149255638 ref X<br>M_001476679.1 | 938  | 6 | 5.44%  | 1.7963<br>22 | 6  | 5.65%  | 1.798<br>335 | -                 |
| 170765                              | 1554 | 6 | 6.11%  | 1.0842<br>66 | 11 | 17.76% | 1.990<br>049 | Ripply3           |
| 1E+08                               | 774  | 6 | 23.77% | 2.1769<br>38 | 2  | 12.66% | 0.726<br>459 | Gm1248<br>0       |
| 78177                               | 5104 | 6 | 5.76%  | 0.3301<br>23 | 3  | 2.88%  | 0.165<br>247 | Nin1              |
| gi 149258967 ref X<br>M_986414.2    | 865  | 6 | 11.10% | 1.9479<br>19 | 2  | 8.09%  | 0.650<br>034 | -                 |
| 72982                               | 918  | 6 | 22.11% | 1.8354<br>57 | 5  | 23.42% | 1.531<br>262 | Tmem13<br>8       |
| 76426                               | 649  | 6 | 32.20% | 2.5962<br>25 | 3  | 8.17%  | 1.299<br>567 | 1700029<br>J11Rik |
| 68044                               | 1328 | 6 | 19.35% | 1.2687<br>87 | 4  | 14.76% | 0.846<br>806 | Chac2             |
| gi 149253125 ref X<br>M_001478120.1 | 752  | 6 | 32.05% | 2.2406<br>25 | 2  | 13.03% | 0.747<br>712 | -                 |
| 213084                              | 2765 | 6 | 10.63% | 0.6093<br>85 | 6  | 10.34% | 0.610<br>068 | Cdk13             |
| 12412                               | 1274 | 6 | 14.21% | 1.3225<br>67 | 8  | 18.92% | 1.765<br>398 | Cbx1              |
| 239552                              | 1838 | 6 | 15.45% | 0.9167<br>3  | -  | -      | -            | Apol8             |
| 17444                               | 2919 | 6 | 8.05%  | 0.5772<br>35 | 2  | 3.36%  | 0.192<br>627 | Grap2             |
| 14422                               | 4086 | 6 | 6.07%  | 0.4123<br>71 | 8  | 7.42%  | 0.550<br>445 | B4galnt2          |
| 433804                              | 2827 | 6 | 8.77%  | 0.5960<br>2  | 4  | 3.64%  | 0.397<br>792 | Gm1315<br>4       |
| 223864                              | 3825 | 6 | 7.69%  | 0.4405<br>1  | 2  | 2.56%  | 0.147<br>001 | Rapgef3           |
| 17896                               | 883  | 6 | 27.97% | 1.9082<br>1  | 6  | 30.80% | 1.910<br>349 | Myl4              |
| 16988                               | 418  | 6 | 38.04% | 4.0309<br>8  | 11 | 60.05% | 7.398<br>412 | Lst1              |
| gi 149258827 ref X<br>M_001476826.1 | 679  | 6 | 19%    | 2.4815<br>17 | 7  | 24.45% | 2.898<br>347 | -                 |
| 104910                              | 1609 | 6 | 14.11% | 1.0472<br>03 | 4  | 12.18% | 0.698<br>918 | Slc25a47          |
| gi 149275192 ref X<br>M_911832.3    | 492  | 6 | 23.58% | 3.4246<br>95 | 2  | 15.24% | 1.142<br>844 | -                 |
| 170748                              | 954  | 6 | 27.88% | 1.7661<br>95 | 5  | 20.65% | 1.473<br>478 | BC0176<br>12      |

|                              |      |   |        |              |    |        |              |                   |
|------------------------------|------|---|--------|--------------|----|--------|--------------|-------------------|
| 16431                        | 1632 | 6 | 17.71% | 1.0324<br>45 | -  | -      | -            | Itm2a             |
| 329831                       | 1348 | 6 | 21.81% | 1.2499<br>63 | 2  | 7.27%  | 0.417<br>121 | Fam166b           |
| 1E+08                        | 712  | 6 | 32.16% | 2.3665<br>02 | 2  | 13.76% | 0.789<br>718 | Gm4358            |
| 216456                       | 2460 | 6 | 11.83% | 0.6849<br>39 | 8  | 14.59% | 0.914<br>275 | Gls2              |
| 26432                        | 3719 | 6 | 6.64%  | 0.4530<br>65 | 11 | 12.26% | 0.831<br>55  | Plod2             |
| 380686                       | 1569 | 6 | 16.95% | 1.0739       | 3  | 9.37%  | 0.537<br>552 | Cnrip1            |
| 17540                        | 5958 | 6 | 4.93%  | 0.2828<br>05 | 18 | 12.29% | 0.849<br>365 | Mrvi1             |
| 320587                       | 3471 | 6 | 4.41%  | 0.4854<br>36 | 2  | 2.62%  | 0.161<br>993 | Tmem88<br>b       |
| 78833                        | 2412 | 6 | 10.16% | 0.6985<br>7  | 4  | 8.13%  | 0.466<br>235 | Gins3             |
| 56525                        | 3521 | 6 | 8.35%  | 0.4785<br>43 | 8  | 11.13% | 0.638<br>772 | Zfp235            |
| 20201                        | 392  | 6 | 50.77% | 4.2983<br>41 | 7  | 57.14% | 5.020<br>351 | S100a8            |
| 70316                        | 800  | 6 | 23.13% | 2.1061<br>87 | 6  | 16.75% | 2.108<br>547 | Ndufab1           |
| 193043                       | 1838 | 6 | 14.36% | 0.9167<br>3  | 1  | 2.67%  | 0.152<br>96  | Zfp3              |
| 110257                       | 587  | 6 | 14.82% | 2.8704<br>43 | 8  | 12.78% | 3.831<br>546 | Hba-a2            |
| 407788                       | 1900 | 6 | 15.16% | 0.8868<br>16 | 3  | 6.21%  | 0.443<br>905 | BC0511<br>42      |
| 72273                        | 575  | 6 | 44.17% | 2.9303<br>47 | 8  | 44.52% | 3.911<br>508 | 2210404<br>O07Rik |
| 17749                        | 619  | 6 | 30.53% | 2.7220<br>51 | 6  | 15.83% | 2.725<br>102 | Polr2k            |
| 56795                        | 1048 | 6 | 27.58% | 1.6077<br>77 | 4  | 11.64% | 1.073<br>052 | Arl10             |
| 107889                       | 2879 | 6 | 8.96%  | 0.5852<br>55 | 3  | 5.11%  | 0.292<br>956 | Gem2              |
| 64706                        | 7824 | 6 | 3.76%  | 0.2153<br>57 | 4  | 2.51%  | 0.143<br>732 | Scube1            |
| gi 256355212 ref NR_015543.1 | 3152 | 6 | 6.19%  | 0.5345<br>65 | 8  | 10.25% | 0.713<br>552 | -                 |
| 239706                       | 1347 | 6 | 21.83% | 1.2508<br>91 | 6  | 20.64% | 1.252<br>292 | Mettl22           |

|                                  |       |   |        |              |    |        |              |              |
|----------------------------------|-------|---|--------|--------------|----|--------|--------------|--------------|
| gi 94409541 ref X<br>M_908887.2  | 431   | 6 | 35.03% | 3.9093<br>96 | 1  | 11.37% | 0.652<br>296 | -            |
| 11419                            | 3800  | 6 | 7.74%  | 0.4434<br>08 | 2  | 2.58%  | 0.147<br>968 | Accn2        |
| 240334                           | 2017  | 6 | 14.58% | 0.8353<br>74 | 3  | 7.29%  | 0.418<br>155 | Pcyox11      |
| 218165                           | 2816  | 6 | 9.94%  | 0.5983<br>49 | 9  | 15.02% | 0.898<br>529 | Ofcc1        |
| 12830                            | 6503  | 6 | 4.52%  | 0.2591<br>03 | 3  | 2.26%  | 0.129<br>697 | Col4a5       |
| 68972                            | 1258  | 6 | 13.04% | 1.3393<br>88 | 3  | 11.69% | 0.670<br>444 | Tatdn3       |
| 23966                            | 10633 | 6 | 2.76%  | 0.1584<br>64 | 5  | 2.30%  | 0.132<br>201 | Tenm4        |
| 1E+08                            | 748   | 6 | 10.96% | 2.2526<br>07 | 4  | 16.84% | 1.503<br>421 | Dynlt1a      |
| 54326                            | 3837  | 6 | 7.66%  | 0.4391<br>32 | 13 | 13.86% | 0.952<br>519 | Elov12       |
| 13038                            | 1482  | 6 | 17.48% | 1.1369<br>43 | 6  | 18.02% | 1.138<br>217 | Ctsk         |
| gi 133892640 ref N<br>M_007558.2 | 1917  | 6 | 13.77% | 0.8789<br>51 | 2  | 5.11%  | 0.293<br>312 | -            |
| 22601                            | 4200  | 6 | 5.52%  | 0.4011<br>79 | 3  | 3.50%  | 0.200<br>814 | Yap1         |
| 107747                           | 3098  | 6 | 8.39%  | 0.5438<br>83 | 11 | 15.98% | 0.998<br>236 | Aldh11l      |
| 103729                           | 1500  | 6 | 16.67% | 1.1233       | 6  | 13.47% | 1.124<br>559 | AI45035<br>3 |
| gi 26986582 ref N<br>M_172274.1  | 5407  | 6 | 5.44%  | 0.3116<br>24 | 6  | 5.44%  | 0.311<br>973 | -            |
| gi 118131214 ref N<br>M_026279.2 | 1453  | 5 | 14.11% | 0.9663<br>63 | 2  | 6.74%  | 0.386<br>978 | -            |
| gi 149260594 ref X<br>R_031876.1 | 3069  | 5 | 7.98%  | 0.4575<br>19 | 3  | 4.79%  | 0.274<br>819 | -            |
| 11668                            | 2032  | 5 | 8.81%  | 0.6910<br>06 | 2  | 4.82%  | 0.276<br>712 | Aldh1a1      |
| 107885                           | 768   | 5 | 16.54% | 1.8282<br>88 | 11 | 25%    | 4.026<br>74  | Mthfs        |
| gi 149267001 ref X<br>M_905288.2 | 1751  | 5 | 13.93% | 0.8018<br>99 | 1  | 2.80%  | 0.160<br>559 | -            |
| 228003                           | 2538  | 5 | 7.84%  | 0.5532<br>41 | 5  | 4.02%  | 0.553<br>861 | Kbtbd10      |
| gi 110815827 ref N<br>M_058214.2 | 3651  | 5 | 6.71%  | 0.3845<br>86 | 10 | 11.48% | 0.770<br>035 | -            |

|                                     |      |   |        |              |    |        |              |                   |
|-------------------------------------|------|---|--------|--------------|----|--------|--------------|-------------------|
| gi 149241413 ref X<br>M_001480453.1 | 429  | 5 | 11.42% | 3.2730<br>18 | 1  | 11.42% | 0.655<br>337 | -                 |
| 1E+08                               | 2322 | 5 | 10.55% | 0.6047<br>05 | 3  | 4.44%  | 0.363<br>23  | Gm1628<br>7       |
| 104871                              | 2076 | 5 | 11.80% | 0.6763<br>61 | 3  | 7.08%  | 0.406<br>271 | Spata7            |
| 11957                               | 797  | 5 | 16.81% | 1.7617<br>63 | 13 | 26.47% | 4.585<br>716 | Atp5j             |
| 72535                               | 2302 | 5 | 10.64% | 0.6099<br>59 | 4  | 8.51%  | 0.488<br>514 | Aldh1b1           |
| 666779                              | 974  | 5 | 15.20% | 1.4416<br>07 | 2  | 10.06% | 0.577<br>289 | Gm8284            |
| 71599                               | 3885 | 5 | 6.31%  | 0.3614<br>22 | 2  | 2.52%  | 0.144<br>731 | Semp8             |
| 12822                               | 5642 | 5 | 4.34%  | 0.2488<br>7  | 40 | 27.77% | 1.993<br>192 | Col18a1           |
| 330503                              | 2955 | 5 | 8.29%  | 0.4751<br>69 | 6  | 8.36%  | 0.570<br>842 | Gm5113            |
| 380785                              | 2728 | 5 | 7.92%  | 0.5147<br>09 | 1  | 1.80%  | 0.103<br>057 | Begain            |
| 80880                               | 2634 | 5 | 9.30%  | 0.5330<br>77 | 9  | 15.83% | 0.960<br>614 | Kank3             |
| 1E+08                               | 1302 | 5 | 6.07%  | 1.0784<br>37 | 4  | 5.68%  | 0.863<br>716 | Gm3593            |
| 1E+08                               | 797  | 5 | 27.85% | 1.7617<br>63 | 3  | 6.78%  | 1.058<br>242 | Gm2270            |
| 106931                              | 3456 | 5 | 7.09%  | 0.4062<br>86 | 2  | 2.84%  | 0.162<br>697 | Kctd1             |
| 72148                               | 2477 | 5 | 9.89%  | 0.5668<br>65 | -  | -      | -            | 2610019<br>F03Rik |
| 668604                              | 423  | 5 | 34.52% | 3.3194<br>44 | 3  | 28.37% | 1.993<br>898 | 1700016<br>P03Rik |
| 381058                              | 2666 | 5 | 8.14%  | 0.5266<br>78 | 3  | 4.16%  | 0.316<br>361 | Unc93a            |
| 257635                              | 1223 | 5 | 20.03% | 1.1480<br>99 | 3  | 12.02% | 0.689<br>631 | Sdsl              |
| 232232                              | 2494 | 5 | 8.90%  | 0.5630<br>01 | 8  | 14.03% | 0.901<br>811 | Hdac11            |
| 667373                              | 2296 | 5 | 10.67% | 0.6115<br>53 | 2  | 4.27%  | 0.244<br>895 | Gm1444<br>6       |
| gi 149260536 ref X<br>M_904559.3    | 1721 | 5 | 9.53%  | 0.8158<br>77 | 4  | 11.39% | 0.653<br>433 | -                 |
| 68240                               | 655  | 5 | 31.45% | 2.1437<br>02 | 11 | 37.25% | 4.721<br>429 | Rpa3              |

|                                 |      |   |        |              |    |        |              |                   |
|---------------------------------|------|---|--------|--------------|----|--------|--------------|-------------------|
| 69576                           | 1267 | 5 | 5.84%  | 1.1082<br>28 | 4  | 9.87%  | 0.887<br>576 | 2310010<br>M20Rik |
| 629303                          | 1875 | 5 | 13.07% | 0.7488<br>67 | 4  | 10.45% | 0.599<br>765 | Gm1143<br>5       |
| 74776                           | 1225 | 5 | 12.41% | 1.1462<br>24 | 7  | 11.76% | 1.606<br>512 | Ppa2              |
| 574418                          | 2570 | 5 | 7.04%  | 0.5463<br>52 | 5  | 9.53%  | 0.546<br>964 | Serinc4           |
| gi 142375548 ref NM_177282.4    | 4853 | 5 | 5.05%  | 0.2893<br>31 | 5  | 5.05%  | 0.289<br>656 | -                 |
| 79565                           | 2831 | 5 | 8.12%  | 0.4959<br>82 | 5  | 8.65%  | 0.496<br>538 | Wbscr27           |
| 68797                           | 1545 | 5 | 13.53% | 0.9088<br>19 | 5  | 11.20% | 0.909<br>837 | Pdgfrl            |
| 407812                          | 3909 | 5 | 5.04%  | 0.3592<br>03 | 2  | 2.51%  | 0.143<br>842 | Zfp941            |
| 17537                           | 1781 | 5 | 8.53%  | 0.7883<br>91 | 10 | 19.09% | 1.578<br>549 | Meis3             |
| 11567                           | 3033 | 5 | 5.44%  | 0.4629<br>49 | 6  | 8.51%  | 0.556<br>162 | Avil              |
| 269870                          | 4914 | 5 | 4.99%  | 0.2857<br>4  | 2  | 1.02%  | 0.114<br>424 | Zfp446            |
| 15213                           | 2215 | 5 | 11.06% | 0.6339<br>16 | 1  | 2.21%  | 0.126<br>925 | Hey1              |
| 71740                           | 3509 | 5 | 6.98%  | 0.4001<br>5  | 3  | 4.19%  | 0.240<br>359 | Pvr14             |
| 637515                          | 4159 | 5 | 4.71%  | 0.3376<br>11 | 6  | 5.89%  | 0.405<br>587 | Nlrp1b            |
| 26878                           | 4578 | 5 | 4.37%  | 0.3067<br>11 | 2  | 2.14%  | 0.122<br>822 | B3galt2           |
| 232670                          | 1959 | 5 | 12.51% | 0.7167<br>56 | -  | -      | -            | Tspan33           |
| 21947                           | 1250 | 5 | 19.28% | 1.1233       | -  | -      | -            | Cd40lg            |
| 225861                          | 1715 | 5 | 14.29% | 0.8187<br>32 | 8  | 20.29% | 1.311<br>439 | Snx32             |
| 67974                           | 4017 | 5 | 4.88%  | 0.3495<br>46 | 4  | 3.73%  | 0.279<br>95  | Ccny              |
| gi 149272185 ref XM_001473042.1 | 1570 | 5 | 11.72% | 0.8943<br>47 | -  | -      | -            | -                 |
| 225341                          | 1688 | 5 | 14.51% | 0.8318<br>27 | 5  | 12.03% | 0.832<br>76  | Lims2             |
| 239759                          | 3811 | 5 | 6.43%  | 0.3684<br>4  | 10 | 11.68% | 0.737<br>706 | Liph              |



|                                     |      |   |        |              |    |        |              |                   |
|-------------------------------------|------|---|--------|--------------|----|--------|--------------|-------------------|
| 20312                               | 3144 | 5 | 7.79%  | 0.4466<br>05 | 1  | 1.56%  | 0.089<br>421 | Cx3cl1            |
| 56711                               | 4635 | 5 | 4.96%  | 0.3029<br>4  | 1  | 1.06%  | 0.060<br>656 | Plag1             |
| gi 94364334 reflX<br>M_001003209.1  | 6284 | 5 | 3.52%  | 0.2234<br>44 | 5  | 2.66%  | 0.223<br>695 | -                 |
| 269589                              | 1940 | 5 | 10.10% | 0.7237<br>76 | 3  | 7.58%  | 0.434<br>752 | Syt11             |
| gi 158533994 reflN<br>M_001110101.1 | 884  | 5 | 22.40% | 1.5883<br>76 | 5  | 19.34% | 1.590<br>156 | -                 |
| 66501                               | 1408 | 5 | 14.91% | 0.9972<br>48 | 6  | 17.19% | 1.198<br>038 | 1700029<br>H14Rik |
| 73422                               | 2682 | 5 | 6.11%  | 0.5235<br>36 | 1  | 1.83%  | 0.104<br>825 | Prox2             |
| 1E+08                               | 1736 | 5 | 14.11% | 0.8088<br>28 | 2  | 5.65%  | 0.323<br>894 | Gm3612            |
| 12305                               | 3814 | 5 | 6.42%  | 0.3681<br>5  | 1  | 1.28%  | 0.073<br>713 | Ddr1              |
| 791260                              | 1354 | 5 | 14.70% | 1.0370<br>2  | 7  | 19.79% | 1.453<br>455 | Tomt              |
| 80797                               | 3654 | 5 | 1.64%  | 0.3842<br>71 | 10 | 1.86%  | 0.769<br>402 | Clca2             |
| 667106                              | 1284 | 5 | 16.51% | 1.0935<br>55 | 4  | 13.47% | 0.875<br>824 | Gm1362<br>0       |
| 241556                              | 3773 | 5 | 6.49%  | 0.3721<br>51 | 6  | 6.20%  | 0.447<br>081 | Tspan18           |
| 269994                              | 3924 | 5 | 2.70%  | 0.3578<br>3  | 4  | 1.48%  | 0.286<br>585 | Gsg11             |
| 101320                              | 2116 | 5 | 9.59%  | 0.6635<br>75 | 1  | 2.32%  | 0.132<br>864 | Dyrk4             |
| 1E+08                               | 3237 | 5 | 7.57%  | 0.4337<br>73 | 1  | 1.51%  | 0.086<br>852 | Gm4650            |
| 216227                              | 4452 | 5 | 4.49%  | 0.3153<br>92 | 5  | 2.49%  | 0.315<br>745 | Slc17a8           |
| 320965                              | 4677 | 5 | 5.24%  | 0.3002<br>19 | 1  | 1.05%  | 0.060<br>111 | 4831440<br>E17Rik |
| 77929                               | 5195 | 5 | 2.89%  | 0.2702<br>84 | 2  | 1.89%  | 0.108<br>235 | Yipf6             |
| 67067                               | 469  | 5 | 17.70% | 2.9938<br>7  | 3  | 17.48% | 1.798<br>335 | Romo1             |
| 12686                               | 1879 | 5 | 10.75% | 0.7472<br>72 | 3  | 7.82%  | 0.448<br>866 | Elovl3            |
| 12827                               | 6426 | 5 | 3.81%  | 0.2185<br>07 | 10 | 7.63%  | 0.437<br>503 | Col4a2            |

|                                 |      |   |        |              |    |        |              |              |   |
|---------------------------------|------|---|--------|--------------|----|--------|--------------|--------------|---|
| gi 149259301 ref XR_033749.1    | 1725 | 5 | 14.20% | 0.8139<br>85 | -  | -      | -            | -            | - |
| 29858                           | 1239 | 5 | 19.77% | 1.1332<br>73 | 9  | 31.48% | 2.042<br>177 | Pmm1         |   |
| 195733                          | 3487 | 5 | 7.03%  | 0.4026<br>74 | 5  | 6.05%  | 0.403<br>125 | Grh11        |   |
| 626055                          | 1547 | 5 | 6.79%  | 0.9076<br>44 | 8  | 10.08% | 1.453<br>857 | Gm1564<br>5  |   |
| 66079                           | 1059 | 5 | 22.47% | 1.3258<br>97 | 11 | 31.26% | 2.920<br>242 | Tmem42       |   |
| gi 142365660 ref NM_026125.2    | 1315 | 5 | 17.87% | 1.0677<br>76 | 9  | 30.27% | 1.924<br>15  | -            |   |
| 14729                           | 2189 | 5 | 10.32% | 0.6414<br>46 | 4  | 8.95%  | 0.513<br>732 | Gp5          |   |
| 72720                           | 3682 | 5 | 5.32%  | 0.3813<br>48 | 3  | 3.99%  | 0.229<br>065 | Zfp248       |   |
| 72309                           | 1744 | 5 | 11.35% | 0.8051<br>17 | 6  | 13.36% | 0.967<br>224 | Tmem15<br>8  |   |
| 68039                           | 701  | 5 | 34.24% | 2.0030<br>31 | 2  | 13.98% | 0.802<br>11  | Nmb          |   |
| 18823                           | 2561 | 5 | 9.57%  | 0.5482<br>72 | 5  | 7.81%  | 0.548<br>886 | Plp1         |   |
| gi 149256086 ref XM_001475879.1 | 3034 | 5 | 8.08%  | 0.4627<br>97 | 1  | 1.62%  | 0.092<br>663 | -            |   |
| 245902                          | 3525 | 5 | 5.82%  | 0.3983<br>33 | 4  | 5.56%  | 0.319<br>024 | Ccdc15       |   |
| 234311                          | 5989 | 5 | 4.09%  | 0.2344<br>51 | 17 | 12.44% | 0.798<br>025 | Ddx60        |   |
| 105651                          | 1852 | 5 | 13.23% | 0.7581<br>67 | 3  | 4.16%  | 0.455<br>41  | Ppp1r3e      |   |
| 15586                           | 2179 | 5 | 11.24% | 0.6443<br>9  | 5  | 8.99%  | 0.645<br>112 | Hyal1        |   |
| 76187                           | 3139 | 5 | 7.81%  | 0.4473<br>16 | 14 | 15.67% | 1.253<br>888 | Adhfe1       |   |
| 78294                           | 821  | 5 | 13.89% | 1.7102<br>62 | 6  | 15.35% | 2.054<br>614 | Rps27a       |   |
| 217887                          | 1915 | 5 | 12.79% | 0.7332<br>24 | 7  | 15.40% | 1.027<br>665 | BC0226<br>87 |   |
| 15571                           | 5027 | 5 | 4.87%  | 0.2793<br>17 | 3  | 2.92%  | 0.167<br>778 | Elavl3       |   |
| 271424                          | 2305 | 5 | 8.94%  | 0.6091<br>65 | 5  | 10.63% | 0.609<br>847 | Ip6k3        |   |
| 233186                          | 2465 | 5 | 7.99%  | 0.5696<br>25 | 2  | 3.98%  | 0.228<br>105 | Siglec5      |   |

|                                     |       |   |        |              |    |        |              |                   |
|-------------------------------------|-------|---|--------|--------------|----|--------|--------------|-------------------|
| 21752                               | 3426  | 5 | 6.86%  | 0.4098<br>44 | 1  | 1.43%  | 0.082<br>061 | Tert              |
| 76074                               | 2459  | 5 | 8.99%  | 0.5710<br>15 | 4  | 7.97%  | 0.457<br>324 | Gbp8              |
| gi 149254555 ref X<br>M_132325.9    | 14537 | 5 | 1.09%  | 0.0965<br>9  | -  | -      | -            | -                 |
| 14788                               | 2676  | 5 | 8.82%  | 0.5247<br>1  | 1  | 1.83%  | 0.105<br>06  | Gpr162            |
| 667315                              | 2915  | 5 | 3.60%  | 0.4816<br>89 | 5  | 1.72%  | 0.482<br>229 | Gm8571            |
| 69810                               | 784   | 5 | 31.25% | 1.7909<br>76 | 2  | 9.18%  | 0.717<br>193 | Clec4b1           |
| gi 149249793 ref X<br>M_001472247.1 | 1076  | 5 | 18.87% | 1.3049<br>49 | 3  | 13.66% | 0.783<br>847 | -                 |
| 232984                              | 1867  | 5 | 13.12% | 0.7520<br>75 | 2  | 5.25%  | 0.301<br>167 | B3gnt8            |
| 545725                              | 1376  | 5 | 8.94%  | 1.0204<br>4  | -  | -      | -            | Mterf             |
| gi 149249670 ref X<br>M_001480448.1 | 1293  | 5 | 15.47% | 1.0859<br>43 | 4  | 7.58%  | 0.869<br>728 | -                 |
| gi 149259046 ref X<br>M_001478153.1 | 1705  | 5 | 3.46%  | 0.8235<br>34 | 5  | 6.74%  | 0.824<br>456 | -                 |
| 242653                              | 4236  | 5 | 4.82%  | 0.3314<br>74 | 4  | 4.63%  | 0.265<br>477 | Cldn19            |
| 320456                              | 2152  | 5 | 9.99%  | 0.6524<br>74 | 8  | 15.43% | 1.045<br>129 | B330016<br>D10Rik |
| 76223                               | 3719  | 5 | 5.43%  | 0.3775<br>54 | 2  | 2.64%  | 0.151<br>191 | Agbl3             |
| 272158                              | 2897  | 5 | 7.25%  | 0.4846<br>82 | 1  | 1.69%  | 0.097<br>045 | Poln              |
| 12859                               | 584   | 5 | 10.62% | 2.4043<br>23 | 11 | 15.24% | 5.295<br>439 | Cox5b             |
| 73254                               | 4682  | 5 | 5.23%  | 0.2998<br>99 | 1  | 1.05%  | 0.060<br>047 | Ccdc18            |
| 66276                               | 615   | 5 | 14.80% | 2.2831<br>3  | 2  | 8.62%  | 0.914<br>275 | 1810009<br>A15Rik |
| 66405                               | 799   | 5 | 26.66% | 1.7573<br>53 | 7  | 33.67% | 2.463<br>051 | Mcts2             |
| gi 149250292 ref X<br>M_979437.2    | 3215  | 5 | 3.64%  | 0.4367<br>42 | 4  | 6.10%  | 0.349<br>785 | -                 |
| 213980                              | 3267  | 5 | 6.49%  | 0.4297<br>9  | 4  | 6%     | 0.344<br>218 | Fbxw10            |
| gi 149363670 ref N<br>M_001033157.3 | 2431  | 5 | 10.08% | 0.5775<br>91 | 2  | 4.03%  | 0.231<br>295 | -                 |

|                                     |       |   |        |              |    |        |              |                   |
|-------------------------------------|-------|---|--------|--------------|----|--------|--------------|-------------------|
| 69698                               | 2698  | 5 | 7.56%  | 0.5204<br>32 | 4  | 7.26%  | 0.416<br>812 | Slc52a3           |
| 19153                               | 5260  | 5 | 4.64%  | 0.2669<br>44 | 3  | 2.79%  | 0.160<br>346 | Prx               |
| 327957                              | 1055  | 5 | 23.22% | 1.3309<br>24 | 2  | 9.29%  | 0.532<br>966 | A430084<br>P05Rik |
| 71835                               | 3657  | 5 | 3.50%  | 0.3839<br>55 | 3  | 3.17%  | 0.230<br>631 | Lanc12            |
| 629750                              | 683   | 5 | 35.87% | 2.0558<br>2  | 2  | 14.35% | 0.823<br>249 | Gm1151<br>7       |
| 66705                               | 1236  | 5 | 12.86% | 1.1360<br>23 | 4  | 14.08% | 0.909<br>837 | Dnase112          |
| 264134                              | 4162  | 5 | 2.76%  | 0.3373<br>68 | 10 | 5.07%  | 0.675<br>492 | Ttc26             |
| 104383                              | 2035  | 5 | 12.04% | 0.6899<br>88 | 3  | 7.22%  | 0.414<br>457 | Rcor2             |
| 26875                               | 20099 | 5 | 0.55%  | 0.0698<br>6  | 6  | 0.48%  | 0.083<br>926 | Pclo              |
| 71876                               | 2467  | 5 | 8.59%  | 0.5691<br>63 | -  | -      | -            | Mlf1ip            |
| 70420                               | 2184  | 5 | 10.21% | 0.6429<br>14 | 3  | 6.73%  | 0.386<br>181 | 2610034<br>B18Rik |
| 15466                               | 2789  | 5 | 8.78%  | 0.5034<br>51 | -  | -      | -            | Hrh2              |
| 74525                               | 4225  | 5 | 5.80%  | 0.3323<br>37 | 6  | 6.75%  | 0.399<br>252 | 8430419<br>L09Rik |
| 319430                              | 3522  | 5 | 5.57%  | 0.3986<br>73 | 15 | 15.42% | 1.197<br>358 | Gpr77             |
| 105734                              | 4851  | 5 | 3.50%  | 0.2894<br>51 | 7  | 7.07%  | 0.405<br>685 | Tigd5             |
| 1E+08                               | 696   | 5 | 8.48%  | 2.0174<br>21 | 5  | 12.07% | 2.019<br>681 | Gm1637<br>8       |
| 240873                              | 2064  | 5 | 11.43% | 0.6802<br>93 | 3  | 7.12%  | 0.408<br>633 | Tnfsf18           |
| 668489                              | 1288  | 5 | 14.52% | 1.0901<br>59 | 1  | 3.80%  | 0.218<br>276 | Gm9199            |
| 14566                               | 1805  | 5 | 12.58% | 0.7779<br>08 | 5  | 11.30% | 0.778<br>78  | Gdf9              |
| 16669                               | 1509  | 5 | 13.32% | 0.9305       | 1  | 3.25%  | 0.186<br>309 | Krt19             |
| gi 149253207 ref X<br>M_001477942.1 | 3393  | 5 | 3.18%  | 0.4138<br>3  | 3  | 2.89%  | 0.248<br>576 | -                 |
| 69837                               | 908   | 5 | 21.15% | 1.5463<br>93 | 3  | 13%    | 0.928<br>876 | Pcgf1             |

|                                  |      |   |        |              |    |        |              |               |
|----------------------------------|------|---|--------|--------------|----|--------|--------------|---------------|
| 14714                            | 532  | 5 | 37.22% | 2.6393<br>32 | 4  | 30.83% | 2.113<br>832 | Gnrh1         |
| 26356                            | 2813 | 5 | 6.15%  | 0.4991<br>56 | 3  | 3.48%  | 0.299<br>829 | Ing1          |
| 114564                           | 2719 | 5 | 7.21%  | 0.5164<br>12 | 4  | 3.97%  | 0.413<br>593 | Csprs         |
| 18028                            | 8772 | 5 | 2.79%  | 0.1600<br>69 | 10 | 5.59%  | 0.320<br>497 | Nfib          |
| 634650                           | 2723 | 5 | 9%     | 0.5156<br>54 | 2  | 3.60%  | 0.206<br>493 | Gbp11         |
| 69159                            | 1227 | 5 | 14.43% | 1.1443<br>56 | 9  | 31.13% | 2.062<br>149 | Rheb11        |
| 20708                            | 1859 | 5 | 13.18% | 0.7553<br>12 | 8  | 19.63% | 1.209<br>853 | Serpinb6<br>b |
| 13051                            | 3729 | 5 | 2.95%  | 0.3765<br>42 | 6  | 4.83%  | 0.452<br>357 | Cx3cr1        |
| 676882                           | 1816 | 5 | 13.11% | 0.7731<br>96 | 2  | 5.40%  | 0.309<br>625 | Gm9693        |
| 21418                            | 3114 | 5 | 6.71%  | 0.4509<br>07 | 4  | 6.29%  | 0.361<br>13  | Tfap2a        |
| 58218                            | 994  | 5 | 24.65% | 1.4126       | 10 | 29.18% | 2.828<br>367 | Trem3         |
| gi 146198557 ref N<br>M_201373.3 | 3601 | 5 | 6.44%  | 0.3899<br>26 | 1  | 1.36%  | 0.078<br>073 | -             |
| gi 283945597 ref N<br>M_030100.3 | 1186 | 5 | 11.47% | 1.1839<br>16 | 1  | 4.13%  | 0.237<br>049 | -             |
| 1E+08                            | 3359 | 5 | 3.30%  | 0.4180<br>19 | 1  | 1.46%  | 0.083<br>697 | Gm2025        |
| 68082                            | 1463 | 5 | 11%    | 0.9597<br>57 | 2  | 6.70%  | 0.384<br>333 | Dusp19        |
| 331487                           | 1112 | 5 | 17.72% | 1.2627<br>02 | 4  | 17.63% | 1.011<br>294 | Uprt          |
| 1E+08                            | 112  | 5 | 66.96% | 12.536<br>83 | 5  | 85.71% | 12.55<br>088 | Snora31       |
| gi 149254377 ref X<br>R_033624.1 | 5374 | 5 | 2.29%  | 0.2612<br>81 | 1  | 0.91%  | 0.052<br>315 | -             |
| 70082                            | 1200 | 5 | 20.17% | 1.1701<br>04 | 6  | 24.50% | 1.405<br>698 | Lysmd2        |
| 22354                            | 4929 | 5 | 4.44%  | 0.2848<br>7  | 2  | 1.99%  | 0.114<br>076 | Vipr1         |
| 54200                            | 1153 | 5 | 21.25% | 1.2178<br>01 | 4  | 17%    | 0.975<br>333 | Sult2b1       |
| 54403                            | 7492 | 5 | 3.27%  | 0.1874<br>17 | 5  | 3.27%  | 0.187<br>627 | Slc4a4        |

|                                  |      |   |        |              |   |        |              |                   |
|----------------------------------|------|---|--------|--------------|---|--------|--------------|-------------------|
| 54371                            | 6256 | 5 | 3.92%  | 0.2244<br>45 | - | -      | -            | Chst2             |
| 66268                            | 692  | 5 | 32.08% | 2.0290<br>82 | 5 | 26.88% | 2.031<br>356 | Pigyl             |
| gi 189458843 ref N<br>M_178078.1 | 8379 | 5 | 0.86%  | 0.1675<br>77 | 2 | 1.17%  | 0.067<br>106 | -                 |
| 238875                           | 2055 | 5 | 5.84%  | 0.6832<br>72 | 2 | 4.77%  | 0.273<br>615 | Gapt              |
| 226849                           | 3082 | 5 | 3.80%  | 0.4555<br>89 | 4 | 4.61%  | 0.364<br>88  | Ppp2r5a           |
| gi 113195691 ref N<br>M_015802.2 | 6122 | 5 | 3.40%  | 0.2293<br>57 | 8 | 5.15%  | 0.367<br>383 | -                 |
| 107260                           | 1677 | 5 | 7.10%  | 0.8372<br>84 | 8 | 6.32%  | 1.341<br>155 | Otub1             |
| 12292                            | 6251 | 5 | 3.57%  | 0.2246<br>24 | 5 | 2.42%  | 0.224<br>876 | Cacna1s           |
| 14812                            | 7515 | 5 | 0.89%  | 0.1868<br>43 | 5 | 0.76%  | 0.187<br>052 | Grin2b            |
| 71836                            | 2045 | 5 | 11.34% | 0.6866<br>14 | 2 | 4.79%  | 0.274<br>953 | Shcbp11           |
| gi 149253659 ref X<br>R_031192.1 | 3824 | 5 | 2.14%  | 0.3671<br>87 | 2 | 2.09%  | 0.147<br>04  | -                 |
| 14115                            | 4477 | 5 | 4.60%  | 0.3136<br>31 | - | -      | -            | Fbln2             |
| 67122                            | 2590 | 5 | 9.46%  | 0.5421<br>33 | 4 | 7.57%  | 0.434<br>193 | Nrarp             |
| 319352                           | 2246 | 5 | 10.91% | 0.6251<br>67 | 1 | 2.18%  | 0.125<br>173 | Pianp             |
| 56047                            | 2135 | 5 | 11.48% | 0.6576<br>7  | 1 | 2.30%  | 0.131<br>681 | Msln              |
| 18405                            | 768  | 5 | 28.91% | 1.8282<br>88 | 2 | 12.76% | 0.732<br>135 | Orm1              |
| 234740                           | 2887 | 5 | 8.28%  | 0.4863<br>61 | 2 | 3.39%  | 0.194<br>762 | Tmem23<br>1       |
| 239559                           | 2145 | 5 | 10.30% | 0.6546<br>04 | - | -      | -            | A4galt            |
| 14675                            | 3383 | 5 | 5.79%  | 0.4150<br>53 | - | -      | -            | Gna14             |
| 1E+08                            | 612  | 5 | 18.14% | 2.2943<br>22 | 4 | 8.01%  | 1.837<br>514 | 4930522<br>L14Rik |
| 70603                            | 1736 | 5 | 11.29% | 0.8088<br>28 | 4 | 11.29% | 0.647<br>787 | Mutyh             |
| 68920                            | 785  | 5 | 28.28% | 1.7886<br>94 | 2 | 6.37%  | 0.716<br>279 | 1110065<br>P20Rik |

|                                     |      |   |        |              |    |        |              |              |
|-------------------------------------|------|---|--------|--------------|----|--------|--------------|--------------|
| 234396                              | 2150 | 5 | 8.28%  | 0.6530<br>81 | 4  | 9.12%  | 0.523<br>051 | Ankle1       |
| 319734                              | 5803 | 5 | 4.22%  | 0.2419<br>65 | 1  | 0.84%  | 0.048<br>447 | Cacna2d<br>4 |
| 1E+08                               | 330  | 5 | 29.09% | 4.2549<br>24 | 3  | 32.42% | 2.555<br>815 | Gm1339<br>1  |
| 14462                               | 3257 | 5 | 7.52%  | 0.4311<br>1  | 1  | 1.50%  | 0.086<br>319 | Gata3        |
| gi 149252252 ref X<br>M_001473370.1 | 708  | 5 | 11.58% | 1.9832<br>27 | 9  | 12.85% | 3.573<br>809 | -            |
| 57434                               | 3230 | 5 | 6.72%  | 0.4347<br>14 | 6  | 9.10%  | 0.522<br>241 | Xrcc2        |
| 74238                               | 1577 | 5 | 10.97% | 0.8903<br>77 | 6  | 18.64% | 1.069<br>65  | Mterfd3      |
| 76954                               | 4255 | 5 | 5.76%  | 0.3299<br>94 | 2  | 2.30%  | 0.132<br>146 | St5          |
| 18196                               | 2140 | 5 | 11.45% | 0.6561<br>33 | 6  | 12.57% | 0.788<br>242 | Nsg1         |
| 353208                              | 1779 | 5 | 12.42% | 0.7892<br>78 | 1  | 2.75%  | 0.158<br>032 | Zfp931       |
| 23955                               | 2714 | 5 | 9.03%  | 0.5173<br>64 | 8  | 12.71% | 0.828<br>709 | Nek4         |
| 52589                               | 3728 | 5 | 6.57%  | 0.3766<br>43 | -  | -      | -            | Ncald        |
| 319757                              | 3977 | 5 | 6.16%  | 0.3530<br>61 | 6  | 7.39%  | 0.424<br>148 | Smo          |
| 1E+08                               | 2346 | 5 | 2.34%  | 0.5985<br>19 | 4  | 2.56%  | 0.479<br>352 | Vmn2r5<br>5  |
| 66541                               | 955  | 5 | 23.77% | 1.4702<br>88 | 1  | 5.13%  | 0.294<br>387 | Immp11       |
| 237611                              | 1790 | 5 | 13.52% | 0.7844<br>27 | 2  | 5.47%  | 0.314<br>123 | Stac3        |
| 57757                               | 2068 | 5 | 11.85% | 0.6789<br>77 | -  | -      | -            | Pglyrp2      |
| gi 149247729 ref X<br>R_032320.1    | 1115 | 5 | 18.03% | 1.2593<br>05 | 4  | 13.45% | 1.008<br>573 | -            |
| 66570                               | 1218 | 5 | 16.17% | 1.1528<br>12 | 7  | 24.55% | 1.615<br>745 | Cenpm        |
| gi 149257472 ref X<br>M_001479969.1 | 2113 | 5 | 11.17% | 0.6645<br>17 | 13 | 24.09% | 1.729<br>681 | -            |
| 215814                              | 1166 | 5 | 20.24% | 1.2042<br>24 | 5  | 13.38% | 1.205<br>573 | Ccdc28a      |
| 381085                              | 3505 | 5 | 4.22%  | 0.4006<br>06 | 4  | 4.51%  | 0.320<br>844 | Tbc1d22<br>b |

|                                  |      |   |        |              |    |        |              |                   |
|----------------------------------|------|---|--------|--------------|----|--------|--------------|-------------------|
| 319801                           | 3653 | 5 | 6.65%  | 0.3843<br>76 | 4  | 5.37%  | 0.307<br>845 | 9630033<br>F20Rik |
| 15199                            | 1086 | 5 | 18.05% | 1.2929<br>33 | 12 | 36.46% | 3.106<br>516 | Hebp1             |
| 68099                            | 1349 | 5 | 14.53% | 1.0408<br>63 | 9  | 24.24% | 1.875<br>654 | Fam92a            |
| 436230                           | 3243 | 5 | 7.55%  | 0.4329<br>71 | 4  | 6.04%  | 0.346<br>765 | BC0653<br>97      |
| 56222                            | 1258 | 5 | 16.30% | 1.1161<br>56 | 2  | 7.79%  | 0.446<br>963 | Cited4            |
| 18132                            | 6604 | 5 | 3.71%  | 0.2126<br>17 | -  | -      | -            | Notch4            |
| 30944                            | 5367 | 5 | 4.56%  | 0.2616<br>22 | 2  | 1.83%  | 0.104<br>766 | Zfp354c           |
| 114663                           | 1386 | 5 | 17.68% | 1.0130<br>77 | 4  | 14.14% | 0.811<br>37  | Impa2             |
| 74030                            | 4668 | 5 | 3.73%  | 0.3007<br>98 | 3  | 2.76%  | 0.180<br>681 | Rin2              |
| 66174                            | 793  | 5 | 25.22% | 1.7706<br>49 | 8  | 45.02% | 2.836<br>213 | Nudt14            |
| 108153                           | 5424 | 5 | 4.52%  | 0.2588<br>73 | 2  | 1.81%  | 0.103<br>665 | Adamts7           |
| 17977                            | 7346 | 5 | 2.55%  | 0.1911<br>41 | 6  | 3.34%  | 0.229<br>627 | Ncoa1             |
| gi 149274200 ref X<br>M_908868.3 | 530  | 5 | 24.34% | 2.6492<br>92 | 2  | 9.81%  | 1.060<br>904 | -                 |
| 669675                           | 670  | 5 | 29.25% | 2.0957<br>09 | 2  | 7.31%  | 0.839<br>223 | Gm9465            |
| 1E+08                            | 2053 | 5 | 5.41%  | 0.6839<br>38 | 4  | 5.41%  | 0.547<br>764 | Gm2173            |
| 71276                            | 3437 | 5 | 7.13%  | 0.4085<br>32 | 7  | 9.57%  | 0.572<br>586 | Ccdc57            |
| 68346                            | 1369 | 5 | 13.88% | 1.0256<br>57 | 4  | 14.32% | 0.821<br>445 | Sirt5             |
| 17967                            | 6993 | 5 | 2.80%  | 0.2007<br>9  | 3  | 1.40%  | 0.120<br>609 | Ncam1             |
| 18670                            | 4083 | 5 | 6%     | 0.3438<br>95 | 4  | 4.80%  | 0.275<br>425 | Abcb4             |
| 64011                            | 1293 | 5 | 14.46% | 1.0859<br>43 | -  | -      | -            | Nrgn              |
| 68693                            | 5726 | 5 | 2.32%  | 0.2452<br>19 | 2  | 0.93%  | 0.098<br>198 | Hrmpul<br>2       |
| 209334                           | 3302 | 5 | 7.42%  | 0.4252<br>35 | 3  | 4.45%  | 0.255<br>427 | Gen1              |



|                                     |      |   |        |              |    |        |              |                   |
|-------------------------------------|------|---|--------|--------------|----|--------|--------------|-------------------|
| 233079                              | 2292 | 5 | 10.69% | 0.6126<br>2  | 2  | 4.28%  | 0.245<br>323 | Ffar2             |
| gi 94378250 ref X<br>M_976380.1     | 2984 | 5 | 4.36%  | 0.4705<br>51 | 2  | 3.28%  | 0.188<br>431 | -                 |
| 14187                               | 1304 | 5 | 12.88% | 1.0767<br>83 | 2  | 7.52%  | 0.431<br>196 | Akr1b8            |
| gi 149257512 ref X<br>M_001478911.1 | 633  | 5 | 15.80% | 2.2182<br>07 | 2  | 7.74%  | 0.888<br>277 | -                 |
| 237387                              | 4311 | 5 | 3.39%  | 0.3257<br>07 | 12 | 7.47%  | 0.782<br>574 | Lrrc3             |
| 68235                               | 1710 | 5 | 12.57% | 0.8211<br>26 | 9  | 23.80% | 1.479<br>682 | 2410066<br>E13Rik |
| 383425                              | 922  | 5 | 6.83%  | 1.5229<br>12 | 1  | 5.31%  | 0.304<br>924 | Gm5243            |
| 19038                               | 1286 | 5 | 15.24% | 1.0918<br>54 | 1  | 3.81%  | 0.218<br>616 | Ppic              |
| 664883                              | 7000 | 5 | 2.80%  | 0.2005<br>89 | 3  | 2.10%  | 0.120<br>488 | Noval             |
| 74762                               | 7566 | 5 | 2.59%  | 0.1855<br>84 | 6  | 3.45%  | 0.222<br>95  | Mdga1             |
| 67030                               | 1775 | 5 | 6.87%  | 0.7910<br>56 | 4  | 9.07%  | 0.633<br>554 | Fanc1             |
| 70036                               | 1036 | 5 | 20.75% | 1.3553<br>33 | 7  | 28.76% | 1.899<br>592 | 2700023<br>E23Rik |
| 1E+08                               | 2106 | 5 | 6.41%  | 0.6667<br>26 | 5  | 9.50%  | 0.667<br>473 | Gm2592            |
| 380728                              | 3784 | 5 | 6.32%  | 0.3710<br>69 | 8  | 10.36% | 0.594<br>376 | Kcnh4             |
| 237988                              | 3700 | 5 | 6.62%  | 0.3794<br>93 | 3  | 3.97%  | 0.227<br>951 | Cdr2l             |
| 635593                              | 1656 | 5 | 5.92%  | 0.8479<br>01 | 1  | 2.96%  | 0.169<br>77  | Gm7161            |
| 226101                              | 7094 | 5 | 2.83%  | 0.1979<br>31 | 7  | 2.73%  | 0.277<br>414 | Myof              |
| 19337                               | 973  | 5 | 24.36% | 1.4430<br>88 | -  | -      | -            | Rab33a            |
| 80794                               | 1677 | 5 | 12.46% | 0.8372<br>84 | 2  | 4.77%  | 0.335<br>289 | Cblc              |
| gi 149255993 ref X<br>M_001475823.1 | 4825 | 5 | 2.96%  | 0.2910<br>1  | 3  | 2.86%  | 0.174<br>802 | -                 |
| 234582                              | 2309 | 5 | 10.61% | 0.6081<br>09 | 2  | 4.24%  | 0.243<br>516 | Ccdc102<br>a      |
| 14063                               | 2773 | 5 | 8.84%  | 0.5063<br>56 | -  | -      | -            | F2r1              |

|                              |       |   |        |              |    |        |              |                   |
|------------------------------|-------|---|--------|--------------|----|--------|--------------|-------------------|
| 66101                        | 2197  | 5 | 8.92%  | 0.6391<br>1  | 8  | 13.79% | 1.023<br>722 | Ppih              |
| 104368                       | 129   | 5 | 76.74% | 10.884<br>69 | 8  | 93.80% | 17.43<br>502 | Snora70           |
| 236690                       | 3635  | 5 | 6.74%  | 0.3862<br>79 | 3  | 2.75%  | 0.232<br>027 | Nyx               |
| 329735                       | 5428  | 5 | 2.80%  | 0.2586<br>82 | 12 | 4.83%  | 0.621<br>532 | 4933431<br>E20Rik |
| 381802                       | 1802  | 5 | 13.60% | 0.7792<br>04 | 5  | 12.82% | 0.780<br>077 | Tsen2             |
| 71733                        | 3255  | 5 | 7.53%  | 0.4313<br>75 | 4  | 6.02%  | 0.345<br>487 | Susd2             |
| 56386                        | 5808  | 5 | 1.43%  | 0.2417<br>57 | 6  | 1.41%  | 0.290<br>434 | B4galt6           |
| 15364                        | 4226  | 5 | 3.69%  | 0.3322<br>59 | 9  | 3.31%  | 0.598<br>736 | Hmga2             |
| 352968                       | 2393  | 5 | 10.24% | 0.5867<br>63 | 2  | 4.10%  | 0.234<br>968 | D830050<br>J10Rik |
| 12704                        | 6898  | 5 | 3.55%  | 0.2035<br>55 | 3  | 2.13%  | 0.122<br>27  | Cit               |
| 433466                       | 1383  | 5 | 17.72% | 1.0152<br>75 | 6  | 12.08% | 1.219<br>695 | Jmjd7             |
| 332993                       | 603   | 5 | 25.87% | 2.3285<br>65 | 4  | 30.02% | 1.864<br>94  | Gm5129            |
| 66634                        | 3203  | 5 | 7.65%  | 0.4383<br>78 | 4  | 6.12%  | 0.351<br>095 | Mcm8              |
| 623223                       | 1105  | 5 | 18.73% | 1.2707<br>01 | 1  | 4.43%  | 0.254<br>425 | Gm6410            |
| 327954                       | 13704 | 5 | 1.79%  | 0.1024<br>61 | 11 | 3.22%  | 0.225<br>667 | Dnahc2            |
| 57765                        | 2552  | 5 | 9.60%  | 0.5502<br>06 | 4  | 5.80%  | 0.440<br>658 | Tbx21             |
| gi 256355045 ref NR_015570.1 | 374   | 5 | 26.47% | 3.7543<br>44 | 2  | 13.37% | 1.503<br>421 | -                 |
| 53857                        | 1432  | 5 | 14.46% | 0.9805<br>34 | -  | -      | -            | Tuba8             |
| 272551                       | 1061  | 5 | 18.47% | 1.3233<br>98 | 6  | 20.17% | 1.589<br>857 | Gins2             |
| 435811                       | 1828  | 5 | 6.62%  | 0.7681<br>21 | 3  | 4.81%  | 0.461<br>389 | Ldlrad2           |
| 15478                        | 3933  | 5 | 6.23%  | 0.3570<br>11 | 1  | 1.25%  | 0.071<br>482 | Hs3st3a1          |
| 76260                        | 2295  | 5 | 10.68% | 0.6118<br>19 | 4  | 8.54%  | 0.490<br>004 | Ttc8              |

|                                 |      |   |        |              |    |        |              |                   |
|---------------------------------|------|---|--------|--------------|----|--------|--------------|-------------------|
| gi 149240918 ref XR_034160.1    | 860  | 5 | 6.05%  | 1.6327<br>03 | -  | -      | -            | -                 |
| gi 149264817 ref XM_001475251.1 | 4436 | 5 | 3.63%  | 0.3165<br>29 | 3  | 1.76%  | 0.190<br>131 | -                 |
| 243277                          | 5163 | 5 | 4.75%  | 0.2719<br>59 | -  | -      | -            | Gpr133            |
| 239731                          | 5848 | 5 | 4.19%  | 0.2401<br>03 | 4  | 3.35%  | 0.192<br>298 | Rimbp3            |
| 70885                           | 2410 | 5 | 8.38%  | 0.5826<br>24 | 3  | 4.85%  | 0.349<br>966 | Ints10            |
| 16890                           | 3221 | 5 | 1.71%  | 0.4359<br>28 | 1  | 1.52%  | 0.087<br>283 | Lipe              |
| 231605                          | 2900 | 5 | 5.76%  | 0.4841<br>81 | 3  | 5.07%  | 0.290<br>834 | Galnt9            |
| 19921                           | 761  | 5 | 6.96%  | 1.8451<br>05 | 4  | 6.57%  | 1.477<br>738 | Rpl19             |
| gi 149256792 ref XM_001476450.1 | 746  | 5 | 20.51% | 1.8822<br>05 | 3  | 19.71% | 1.130<br>588 | -                 |
| 243906                          | 3491 | 5 | 7.02%  | 0.4022<br>13 | 2  | 2.81%  | 0.161<br>065 | Zfp14             |
| gi 146141156 ref NM_026940.3    | 1294 | 5 | 16.85% | 1.0851<br>04 | 1  | 3.79%  | 0.217<br>264 | -                 |
| 225266                          | 4018 | 5 | 5.15%  | 0.3494<br>59 | 3  | 2.94%  | 0.209<br>91  | Klh14             |
| 14415                           | 3231 | 5 | 7.58%  | 0.4345<br>79 | -  | -      | -            | Gad1              |
| 66061                           | 661  | 5 | 30.26% | 2.1242<br>43 | 6  | 44.48% | 2.551<br>949 | Tctex1d2          |
| 27389                           | 1745 | 5 | 12.66% | 0.8046<br>56 | 7  | 17.42% | 1.127<br>781 | Dusp13            |
| 102871                          | 3738 | 5 | 6.55%  | 0.3756<br>35 | 5  | 6.55%  | 0.376<br>056 | D330045<br>A20Rik |
| 66643                           | 3124 | 5 | 3.84%  | 0.4494<br>64 | 1  | 1.57%  | 0.089<br>993 | Lix1              |
| 1E+08                           | 2031 | 5 | 12.06% | 0.6913<br>47 | 1  | 2.41%  | 0.138<br>424 | Gm1611<br>9       |
| 76890                           | 1499 | 5 | 7.87%  | 0.9367<br>08 | 2  | 4.20%  | 0.375<br>103 | Memo1             |
| 11923                           | 3376 | 5 | 7.26%  | 0.4159<br>14 | -  | -      | -            | Neurod4           |
| 72865                           | 965  | 5 | 18.24% | 1.4550<br>52 | 2  | 10.16% | 0.582<br>673 | Cxx1c             |
| 207209                          | 2417 | 5 | 8.36%  | 0.5809<br>37 | 10 | 16.30% | 1.163<br>176 | Ccdc154           |

|                                 |      |   |        |              |   |        |              |         |
|---------------------------------|------|---|--------|--------------|---|--------|--------------|---------|
| 22402                           | 5022 | 5 | 4.88%  | 0.2795<br>95 | 4 | 2.95%  | 0.223<br>926 | Wisp1   |
| gi 149268369 ref XR_035299.1    | 395  | 5 | 40.51% | 3.5547<br>46 | 8 | 46.08% | 5.693<br>968 | -       |
| gi 149254290 ref XM_001475570.1 | 1909 | 5 | 10.90% | 0.7355<br>29 | 4 | 10.27% | 0.589<br>083 | -       |
| 70218                           | 3345 | 5 | 7.06%  | 0.4197<br>68 | 1 | 1.46%  | 0.084<br>048 | Kif18b  |
| 67196                           | 1079 | 5 | 16.22% | 1.3013<br>2  | 4 | 14.74% | 1.042<br>223 | Ube2t   |
| 228714                          | 3748 | 5 | 3.84%  | 0.3746<br>33 | 3 | 2.80%  | 0.225<br>032 | Csrp2bp |
| 231125                          | 3980 | 5 | 6.16%  | 0.3527<br>95 | 2 | 2.09%  | 0.141<br>276 | Zfyve28 |
| 245670                          | 2308 | 5 | 10.49% | 0.6083<br>73 | 5 | 10.62% | 0.609<br>055 | Rragb   |
| gi 149269453 ref XM_001480097.1 | 1696 | 5 | 3.71%  | 0.8279<br>04 | 2 | 5.78%  | 0.331<br>533 | -       |
| 15013                           | 1100 | 5 | 14.18% | 1.2764<br>77 | 4 | 14.18% | 1.022<br>326 | H2-Q2   |
| 12005                           | 3809 | 5 | 1.60%  | 0.3686<br>33 | 7 | 2.57%  | 0.516<br>665 | Axin1   |
| 52882                           | 5828 | 5 | 1.78%  | 0.2409<br>27 | 8 | 2.68%  | 0.385<br>916 | Rgs7bp  |
| 18703                           | 3849 | 5 | 5.22%  | 0.3648<br>02 | 5 | 6.37%  | 0.365<br>211 | Pigr    |
| 545548                          | 623  | 5 | 8.51%  | 2.2538<br>12 | 9 | 8.83%  | 4.061<br>408 | Lce3a   |
| 227801                          | 4352 | 5 | 3.54%  | 0.3226<br>39 | 2 | 1.93%  | 0.129<br>2   | Dennd1a |
| gi 118130906 ref NM_133752.2    | 3828 | 5 | 5.20%  | 0.3668<br>04 | 2 | 2.04%  | 0.146<br>886 | -       |
| gi 149249684 ref XM_001480782.1 | 1155 | 5 | 15.06% | 1.2156<br>92 | 4 | 16.97% | 0.973<br>644 | -       |
